# Supplementary material for: High-Dose Buprenorphine Induction in the Emergency Department for Treatment of Opioid Use Disorder
Source: PubMed Central journal article supplement (PMC8283555; doi:10.1001/jamanetworkopen.2021.17128), 2021-07-15
Supplement: jamanetwopen-e2117128-s001.pdf [file jamanetwopen-e2117128-s001.pdf]

## Supplemental Online Content

Herring AA, Vosooghi AA, Luftig J, et al. High-dose buprenorphine induction in the emergency department for treatment of opioid use disorder. *JAMA Netw Open*. 2021;4(7):e2117128.  
doi:10.1001/jamanetworkopen.2021.17128

### **eTable.** Data Dictionary

This supplemental material has been provided by the authors to give readers additional information about their work.

eTable. Data Dictionary

Data Dictionary Codebook

| #  | Variable / Field Name                                                  | Field Label<br><i>Field Note</i>                                                                                                                                                                              | Field Attributes (Field Type, Validation, Choices, Calculations, etc.)                                                                                                                                                                                                         |   |                    |   |                     |   |                  |   |              |
|----|------------------------------------------------------------------------|---------------------------------------------------------------------------------------------------------------------------------------------------------------------------------------------------------------|--------------------------------------------------------------------------------------------------------------------------------------------------------------------------------------------------------------------------------------------------------------------------------|---|--------------------|---|---------------------|---|------------------|---|--------------|
| 1  | <b>record_id</b>                                                       | <b>Record ID</b>                                                                                                                                                                                              | <b>text</b>                                                                                                                                                                                                                                                                    |   |                    |   |                     |   |                  |   |              |
| 2  | <b>reviewer</b>                                                        | <b>Chart Reviewer Name</b><br><i>Enter as: Last Name, First Initial.</i>                                                                                                                                      | <b>radio, Required</b> <table border="1" style="margin-left: 20px;"> <tr> <td>1</td> <td><b>Herring, A.</b></td> </tr> <tr> <td>2</td> <td><b>Vosooghi, A.</b></td> </tr> <tr> <td>3</td> <td><b>Vuong, C.</b></td> </tr> <tr> <td>4</td> <td><b>Other</b></td> </tr> </table> | 1 | <b>Herring, A.</b> | 2 | <b>Vosooghi, A.</b> | 3 | <b>Vuong, C.</b> | 4 | <b>Other</b> |
| 1  | <b>Herring, A.</b>                                                     |                                                                                                                                                                                                               |                                                                                                                                                                                                                                                                                |   |                    |   |                     |   |                  |   |              |
| 2  | <b>Vosooghi, A.</b>                                                    |                                                                                                                                                                                                               |                                                                                                                                                                                                                                                                                |   |                    |   |                     |   |                  |   |              |
| 3  | <b>Vuong, C.</b>                                                       |                                                                                                                                                                                                               |                                                                                                                                                                                                                                                                                |   |                    |   |                     |   |                  |   |              |
| 4  | <b>Other</b>                                                           |                                                                                                                                                                                                               |                                                                                                                                                                                                                                                                                |   |                    |   |                     |   |                  |   |              |
| 3  | <b>reviewer_oth</b><br><b>Show the field ONLY if: [reviewer] = '4'</b> | <b>If "Other," please specify as "Last name, First initial."</b>                                                                                                                                              | <b>text, Required</b>                                                                                                                                                                                                                                                          |   |                    |   |                     |   |                  |   |              |
| 4  | <b>name</b>                                                            | <b>Section Header: Demographics</b><br><b>Patient's full name as it appears in Wellsoft: Last name, Firstname</b><br><i>Copy and paste from Wellsoft (click on the relevant field in Chart, then Ctrl-C).</i> | <b>text, Required, Identifier</b>                                                                                                                                                                                                                                              |   |                    |   |                     |   |                  |   |              |
| 5  | <b>dob</b>                                                             | <b>Date of birth</b><br><i>Copy and paste from Wellsoft.</i>                                                                                                                                                  | <b>text (date_mdy), Required, Identifier</b>                                                                                                                                                                                                                                   |   |                    |   |                     |   |                  |   |              |
| 6  | <b>age</b>                                                             | <b>Age</b><br><i>Calculated from dob.</i>                                                                                                                                                                     | <b>calc, Required, Identifier</b><br><b>Calculation: rounddown( datediff("today", [dob], "y", "mdy"), 0 )</b>                                                                                                                                                                  |   |                    |   |                     |   |                  |   |              |
| 7  | <b>gender</b>                                                          | <b>Gender</b><br><i>Trans and GNC information can be found in HPI.</i>                                                                                                                                        | <b>radio, Required</b>                                                                                                                                                                                                                                                         |   |                    |   |                     |   |                  |   |              |
| 8  | <b>arrival</b>                                                         | <b>Date and time of arrival</b><br><i>Copy and paste from Wellsoft</i>                                                                                                                                        | <b>text (datetime_mdy), Required, Identifier</b>                                                                                                                                                                                                                               |   |                    |   |                     |   |                  |   |              |
| 9  | <b>mrn</b>                                                             | <b>MRN</b><br><i>Copy and paste from Wellsoft.</i>                                                                                                                                                            | <b>text (integer, Min: 0, Max: 999999999), Required, Identifier</b>                                                                                                                                                                                                            |   |                    |   |                     |   |                  |   |              |
| 10 | <b>encounter</b>                                                       | <b>Encounter #</b><br><i>Copy and paste from Wellsoft.</i>                                                                                                                                                    | <b>text, Required, Identifier</b>                                                                                                                                                                                                                                              |   |                    |   |                     |   |                  |   |              |

|     |                                  |                                                                                                                                              |                                                                                                                                                                                                                                                                                                                                                                                                                                                                                                                                                                                                                                                                                                                                                                                                           |   |                                  |   |                            |     |                           |   |         |   |          |   |                       |   |          |   |        |   |                 |    |             |    |                        |    |            |    |        |    |            |    |       |    |            |     |         |
|-----|----------------------------------|----------------------------------------------------------------------------------------------------------------------------------------------|-----------------------------------------------------------------------------------------------------------------------------------------------------------------------------------------------------------------------------------------------------------------------------------------------------------------------------------------------------------------------------------------------------------------------------------------------------------------------------------------------------------------------------------------------------------------------------------------------------------------------------------------------------------------------------------------------------------------------------------------------------------------------------------------------------------|---|----------------------------------|---|----------------------------|-----|---------------------------|---|---------|---|----------|---|-----------------------|---|----------|---|--------|---|-----------------|----|-------------|----|------------------------|----|------------|----|--------|----|------------|----|-------|----|------------|-----|---------|
| 11  | <b>race</b>                      | <b>Race</b><br><i>Look in "View: Patient Charts - All Fields" in Wellsoft.</i>                                                               | <b>radio, Required</b> <table border="1" data-bbox="1047 115 1482 934"> <tr><td>1</td><td>American Indian or Alaska Native</td></tr> <tr><td>2</td><td>Asian Indian</td></tr> <tr><td>3</td><td>Black</td></tr> <tr><td>4</td><td>Chinese</td></tr> <tr><td>5</td><td>Filipino</td></tr> <tr><td>6</td><td>Guamanian or Chamorro</td></tr> <tr><td>7</td><td>Japanese</td></tr> <tr><td>8</td><td>Korean</td></tr> <tr><td>9</td><td>Native Hawaiian</td></tr> <tr><td>10</td><td>Other Asian</td></tr> <tr><td>11</td><td>Other Pacific Islander</td></tr> <tr><td>12</td><td>Other Race</td></tr> <tr><td>13</td><td>Samoan</td></tr> <tr><td>14</td><td>Vietnamese</td></tr> <tr><td>15</td><td>White</td></tr> <tr><td>16</td><td>Other Race</td></tr> <tr><td>999</td><td>Unknown</td></tr> </table> | 1 | American Indian or Alaska Native | 2 | Asian Indian               | 3   | Black                     | 4 | Chinese | 5 | Filipino | 6 | Guamanian or Chamorro | 7 | Japanese | 8 | Korean | 9 | Native Hawaiian | 10 | Other Asian | 11 | Other Pacific Islander | 12 | Other Race | 13 | Samoan | 14 | Vietnamese | 15 | White | 16 | Other Race | 999 | Unknown |
| 1   | American Indian or Alaska Native |                                                                                                                                              |                                                                                                                                                                                                                                                                                                                                                                                                                                                                                                                                                                                                                                                                                                                                                                                                           |   |                                  |   |                            |     |                           |   |         |   |          |   |                       |   |          |   |        |   |                 |    |             |    |                        |    |            |    |        |    |            |    |       |    |            |     |         |
| 2   | Asian Indian                     |                                                                                                                                              |                                                                                                                                                                                                                                                                                                                                                                                                                                                                                                                                                                                                                                                                                                                                                                                                           |   |                                  |   |                            |     |                           |   |         |   |          |   |                       |   |          |   |        |   |                 |    |             |    |                        |    |            |    |        |    |            |    |       |    |            |     |         |
| 3   | Black                            |                                                                                                                                              |                                                                                                                                                                                                                                                                                                                                                                                                                                                                                                                                                                                                                                                                                                                                                                                                           |   |                                  |   |                            |     |                           |   |         |   |          |   |                       |   |          |   |        |   |                 |    |             |    |                        |    |            |    |        |    |            |    |       |    |            |     |         |
| 4   | Chinese                          |                                                                                                                                              |                                                                                                                                                                                                                                                                                                                                                                                                                                                                                                                                                                                                                                                                                                                                                                                                           |   |                                  |   |                            |     |                           |   |         |   |          |   |                       |   |          |   |        |   |                 |    |             |    |                        |    |            |    |        |    |            |    |       |    |            |     |         |
| 5   | Filipino                         |                                                                                                                                              |                                                                                                                                                                                                                                                                                                                                                                                                                                                                                                                                                                                                                                                                                                                                                                                                           |   |                                  |   |                            |     |                           |   |         |   |          |   |                       |   |          |   |        |   |                 |    |             |    |                        |    |            |    |        |    |            |    |       |    |            |     |         |
| 6   | Guamanian or Chamorro            |                                                                                                                                              |                                                                                                                                                                                                                                                                                                                                                                                                                                                                                                                                                                                                                                                                                                                                                                                                           |   |                                  |   |                            |     |                           |   |         |   |          |   |                       |   |          |   |        |   |                 |    |             |    |                        |    |            |    |        |    |            |    |       |    |            |     |         |
| 7   | Japanese                         |                                                                                                                                              |                                                                                                                                                                                                                                                                                                                                                                                                                                                                                                                                                                                                                                                                                                                                                                                                           |   |                                  |   |                            |     |                           |   |         |   |          |   |                       |   |          |   |        |   |                 |    |             |    |                        |    |            |    |        |    |            |    |       |    |            |     |         |
| 8   | Korean                           |                                                                                                                                              |                                                                                                                                                                                                                                                                                                                                                                                                                                                                                                                                                                                                                                                                                                                                                                                                           |   |                                  |   |                            |     |                           |   |         |   |          |   |                       |   |          |   |        |   |                 |    |             |    |                        |    |            |    |        |    |            |    |       |    |            |     |         |
| 9   | Native Hawaiian                  |                                                                                                                                              |                                                                                                                                                                                                                                                                                                                                                                                                                                                                                                                                                                                                                                                                                                                                                                                                           |   |                                  |   |                            |     |                           |   |         |   |          |   |                       |   |          |   |        |   |                 |    |             |    |                        |    |            |    |        |    |            |    |       |    |            |     |         |
| 10  | Other Asian                      |                                                                                                                                              |                                                                                                                                                                                                                                                                                                                                                                                                                                                                                                                                                                                                                                                                                                                                                                                                           |   |                                  |   |                            |     |                           |   |         |   |          |   |                       |   |          |   |        |   |                 |    |             |    |                        |    |            |    |        |    |            |    |       |    |            |     |         |
| 11  | Other Pacific Islander           |                                                                                                                                              |                                                                                                                                                                                                                                                                                                                                                                                                                                                                                                                                                                                                                                                                                                                                                                                                           |   |                                  |   |                            |     |                           |   |         |   |          |   |                       |   |          |   |        |   |                 |    |             |    |                        |    |            |    |        |    |            |    |       |    |            |     |         |
| 12  | Other Race                       |                                                                                                                                              |                                                                                                                                                                                                                                                                                                                                                                                                                                                                                                                                                                                                                                                                                                                                                                                                           |   |                                  |   |                            |     |                           |   |         |   |          |   |                       |   |          |   |        |   |                 |    |             |    |                        |    |            |    |        |    |            |    |       |    |            |     |         |
| 13  | Samoan                           |                                                                                                                                              |                                                                                                                                                                                                                                                                                                                                                                                                                                                                                                                                                                                                                                                                                                                                                                                                           |   |                                  |   |                            |     |                           |   |         |   |          |   |                       |   |          |   |        |   |                 |    |             |    |                        |    |            |    |        |    |            |    |       |    |            |     |         |
| 14  | Vietnamese                       |                                                                                                                                              |                                                                                                                                                                                                                                                                                                                                                                                                                                                                                                                                                                                                                                                                                                                                                                                                           |   |                                  |   |                            |     |                           |   |         |   |          |   |                       |   |          |   |        |   |                 |    |             |    |                        |    |            |    |        |    |            |    |       |    |            |     |         |
| 15  | White                            |                                                                                                                                              |                                                                                                                                                                                                                                                                                                                                                                                                                                                                                                                                                                                                                                                                                                                                                                                                           |   |                                  |   |                            |     |                           |   |         |   |          |   |                       |   |          |   |        |   |                 |    |             |    |                        |    |            |    |        |    |            |    |       |    |            |     |         |
| 16  | Other Race                       |                                                                                                                                              |                                                                                                                                                                                                                                                                                                                                                                                                                                                                                                                                                                                                                                                                                                                                                                                                           |   |                                  |   |                            |     |                           |   |         |   |          |   |                       |   |          |   |        |   |                 |    |             |    |                        |    |            |    |        |    |            |    |       |    |            |     |         |
| 999 | Unknown                          |                                                                                                                                              |                                                                                                                                                                                                                                                                                                                                                                                                                                                                                                                                                                                                                                                                                                                                                                                                           |   |                                  |   |                            |     |                           |   |         |   |          |   |                       |   |          |   |        |   |                 |    |             |    |                        |    |            |    |        |    |            |    |       |    |            |     |         |
| 12  | <b>ethnicity</b>                 | <b>Ethnicity</b><br><i>1 = Hispanic or Latino; 2 = Non-Hispanic or Non-Latino; 4 = Other Hispanic or Latino</i>                              | <b>radio, Required</b> <table border="1" data-bbox="1047 982 1430 1129"> <tr><td>1</td><td>Hispanic or Latino</td></tr> <tr><td>2</td><td>Non-Hispanic or Non-Latino</td></tr> <tr><td>999</td><td>Unknown/Declined to state</td></tr> </table>                                                                                                                                                                                                                                                                                                                                                                                                                                                                                                                                                           | 1 | Hispanic or Latino               | 2 | Non-Hispanic or Non-Latino | 999 | Unknown/Declined to state |   |         |   |          |   |                       |   |          |   |        |   |                 |    |             |    |                        |    |            |    |        |    |            |    |       |    |            |     |         |
| 1   | Hispanic or Latino               |                                                                                                                                              |                                                                                                                                                                                                                                                                                                                                                                                                                                                                                                                                                                                                                                                                                                                                                                                                           |   |                                  |   |                            |     |                           |   |         |   |          |   |                       |   |          |   |        |   |                 |    |             |    |                        |    |            |    |        |    |            |    |       |    |            |     |         |
| 2   | Non-Hispanic or Non-Latino       |                                                                                                                                              |                                                                                                                                                                                                                                                                                                                                                                                                                                                                                                                                                                                                                                                                                                                                                                                                           |   |                                  |   |                            |     |                           |   |         |   |          |   |                       |   |          |   |        |   |                 |    |             |    |                        |    |            |    |        |    |            |    |       |    |            |     |         |
| 999 | Unknown/Declined to state        |                                                                                                                                              |                                                                                                                                                                                                                                                                                                                                                                                                                                                                                                                                                                                                                                                                                                                                                                                                           |   |                                  |   |                            |     |                           |   |         |   |          |   |                       |   |          |   |        |   |                 |    |             |    |                        |    |            |    |        |    |            |    |       |    |            |     |         |
| 13  | <b>address</b>                   | <b>Mailing Address</b><br><i>Copy and paste from Wellsoft. Write "N/A" if none listed (i.e., homeless).</i>                                  | <b>text, Required, Identifier</b>                                                                                                                                                                                                                                                                                                                                                                                                                                                                                                                                                                                                                                                                                                                                                                         |   |                                  |   |                            |     |                           |   |         |   |          |   |                       |   |          |   |        |   |                 |    |             |    |                        |    |            |    |        |    |            |    |       |    |            |     |         |
| 14  | <b>city</b>                      | <b>City</b><br><i>Copy and paste from Wellsoft. Write "N/A" if none listed.</i>                                                              | <b>text, Required, Identifier</b>                                                                                                                                                                                                                                                                                                                                                                                                                                                                                                                                                                                                                                                                                                                                                                         |   |                                  |   |                            |     |                           |   |         |   |          |   |                       |   |          |   |        |   |                 |    |             |    |                        |    |            |    |        |    |            |    |       |    |            |     |         |
| 15  | <b>state</b>                     | <b>State</b><br><i>Copy and paste from Wellsoft. Write "N/A" if none listed.</i>                                                             | <b>text, Required, Identifier</b>                                                                                                                                                                                                                                                                                                                                                                                                                                                                                                                                                                                                                                                                                                                                                                         |   |                                  |   |                            |     |                           |   |         |   |          |   |                       |   |          |   |        |   |                 |    |             |    |                        |    |            |    |        |    |            |    |       |    |            |     |         |
| 16  | <b>zip</b>                       | <b>Zip code</b><br><i>Enter 99999 if no zip code available.</i>                                                                              | <b>text (zipcode), Required, Identifier</b>                                                                                                                                                                                                                                                                                                                                                                                                                                                                                                                                                                                                                                                                                                                                                               |   |                                  |   |                            |     |                           |   |         |   |          |   |                       |   |          |   |        |   |                 |    |             |    |                        |    |            |    |        |    |            |    |       |    |            |     |         |
| 17  | <b>homeless</b>                  | <b>Homeless</b><br><i>Back-ill from chart, if necessary.</i>                                                                                 | <b>radio, Required</b> <table border="1" data-bbox="1047 1503 1187 1650"> <tr><td>1</td><td>True</td></tr> <tr><td>0</td><td>False</td></tr> <tr><td>999</td><td>Blank</td></tr> </table>                                                                                                                                                                                                                                                                                                                                                                                                                                                                                                                                                                                                                 | 1 | True                             | 0 | False                      | 999 | Blank                     |   |         |   |          |   |                       |   |          |   |        |   |                 |    |             |    |                        |    |            |    |        |    |            |    |       |    |            |     |         |
| 1   | True                             |                                                                                                                                              |                                                                                                                                                                                                                                                                                                                                                                                                                                                                                                                                                                                                                                                                                                                                                                                                           |   |                                  |   |                            |     |                           |   |         |   |          |   |                       |   |          |   |        |   |                 |    |             |    |                        |    |            |    |        |    |            |    |       |    |            |     |         |
| 0   | False                            |                                                                                                                                              |                                                                                                                                                                                                                                                                                                                                                                                                                                                                                                                                                                                                                                                                                                                                                                                                           |   |                                  |   |                            |     |                           |   |         |   |          |   |                       |   |          |   |        |   |                 |    |             |    |                        |    |            |    |        |    |            |    |       |    |            |     |         |
| 999 | Blank                            |                                                                                                                                              |                                                                                                                                                                                                                                                                                                                                                                                                                                                                                                                                                                                                                                                                                                                                                                                                           |   |                                  |   |                            |     |                           |   |         |   |          |   |                       |   |          |   |        |   |                 |    |             |    |                        |    |            |    |        |    |            |    |       |    |            |     |         |
| 18  | <b>emerg_phone</b>               | <b>Section Header:</b> <i>Ext Dmg</i><br><b>Emergency Contact # ****</b><br><i>Found under "Ext Dmg." Enter 999 999 9999 if none listed.</i> | <b>text, Required, Identifier</b>                                                                                                                                                                                                                                                                                                                                                                                                                                                                                                                                                                                                                                                                                                                                                                         |   |                                  |   |                            |     |                           |   |         |   |          |   |                       |   |          |   |        |   |                 |    |             |    |                        |    |            |    |        |    |            |    |       |    |            |     |         |

|     |                                                                             |                                                                                                                                                                                                                                    |                                                                                                                                                                                                                                                                                                                                                                                                                                                                                                                                                                                                                                                                                                                                                                              |   |                                         |         |     |               |          |   |                 |          |       |               |                                  |   |               |                       |   |               |                                            |   |               |                        |   |               |              |     |                 |         |
|-----|-----------------------------------------------------------------------------|------------------------------------------------------------------------------------------------------------------------------------------------------------------------------------------------------------------------------------|------------------------------------------------------------------------------------------------------------------------------------------------------------------------------------------------------------------------------------------------------------------------------------------------------------------------------------------------------------------------------------------------------------------------------------------------------------------------------------------------------------------------------------------------------------------------------------------------------------------------------------------------------------------------------------------------------------------------------------------------------------------------------|---|-----------------------------------------|---------|-----|---------------|----------|---|-----------------|----------|-------|---------------|----------------------------------|---|---------------|-----------------------|---|---------------|--------------------------------------------|---|---------------|------------------------|---|---------------|--------------|-----|-----------------|---------|
| 19  | insurance_1                                                                 | <p><b>Section Header:</b> <i>Financial</i></p> <p><b>Insurance status ****</b><br/> <i>Look in "View: Patient Charts - All Fields" in Wellsoft. If none listed, check against ED Bridge intake form.</i></p>                       | <p><b>checkbox, Required</b></p> <table border="1" data-bbox="1047 115 1523 703"> <tr> <td>1</td> <td>insurance_1_1</td> <td>Private</td> </tr> <tr> <td>2</td> <td>insurance_1_2</td> <td>Medi-Cal</td> </tr> <tr> <td>3</td> <td>insurance_1_3</td> <td>Medicare</td> </tr> <tr> <td>4</td> <td>insurance_1_4</td> <td>Military (i.e. Tricare, VA, etc)</td> </tr> <tr> <td>5</td> <td>insurance_1_5</td> <td>Indian Health Service</td> </tr> <tr> <td>6</td> <td>insurance_1_6</td> <td>County based (HealthPAC, Healthy SF, etc.)</td> </tr> <tr> <td>7</td> <td>insurance_1_7</td> <td>Other public insurance</td> </tr> <tr> <td>8</td> <td>insurance_1_8</td> <td>No insurance</td> </tr> <tr> <td>999</td> <td>insurance_1_999</td> <td>Unknown</td> </tr> </table> | 1 | insurance_1_1                           | Private | 2   | insurance_1_2 | Medi-Cal | 3 | insurance_1_3   | Medicare | 4     | insurance_1_4 | Military (i.e. Tricare, VA, etc) | 5 | insurance_1_5 | Indian Health Service | 6 | insurance_1_6 | County based (HealthPAC, Healthy SF, etc.) | 7 | insurance_1_7 | Other public insurance | 8 | insurance_1_8 | No insurance | 999 | insurance_1_999 | Unknown |
| 1   | insurance_1_1                                                               | Private                                                                                                                                                                                                                            |                                                                                                                                                                                                                                                                                                                                                                                                                                                                                                                                                                                                                                                                                                                                                                              |   |                                         |         |     |               |          |   |                 |          |       |               |                                  |   |               |                       |   |               |                                            |   |               |                        |   |               |              |     |                 |         |
| 2   | insurance_1_2                                                               | Medi-Cal                                                                                                                                                                                                                           |                                                                                                                                                                                                                                                                                                                                                                                                                                                                                                                                                                                                                                                                                                                                                                              |   |                                         |         |     |               |          |   |                 |          |       |               |                                  |   |               |                       |   |               |                                            |   |               |                        |   |               |              |     |                 |         |
| 3   | insurance_1_3                                                               | Medicare                                                                                                                                                                                                                           |                                                                                                                                                                                                                                                                                                                                                                                                                                                                                                                                                                                                                                                                                                                                                                              |   |                                         |         |     |               |          |   |                 |          |       |               |                                  |   |               |                       |   |               |                                            |   |               |                        |   |               |              |     |                 |         |
| 4   | insurance_1_4                                                               | Military (i.e. Tricare, VA, etc)                                                                                                                                                                                                   |                                                                                                                                                                                                                                                                                                                                                                                                                                                                                                                                                                                                                                                                                                                                                                              |   |                                         |         |     |               |          |   |                 |          |       |               |                                  |   |               |                       |   |               |                                            |   |               |                        |   |               |              |     |                 |         |
| 5   | insurance_1_5                                                               | Indian Health Service                                                                                                                                                                                                              |                                                                                                                                                                                                                                                                                                                                                                                                                                                                                                                                                                                                                                                                                                                                                                              |   |                                         |         |     |               |          |   |                 |          |       |               |                                  |   |               |                       |   |               |                                            |   |               |                        |   |               |              |     |                 |         |
| 6   | insurance_1_6                                                               | County based (HealthPAC, Healthy SF, etc.)                                                                                                                                                                                         |                                                                                                                                                                                                                                                                                                                                                                                                                                                                                                                                                                                                                                                                                                                                                                              |   |                                         |         |     |               |          |   |                 |          |       |               |                                  |   |               |                       |   |               |                                            |   |               |                        |   |               |              |     |                 |         |
| 7   | insurance_1_7                                                               | Other public insurance                                                                                                                                                                                                             |                                                                                                                                                                                                                                                                                                                                                                                                                                                                                                                                                                                                                                                                                                                                                                              |   |                                         |         |     |               |          |   |                 |          |       |               |                                  |   |               |                       |   |               |                                            |   |               |                        |   |               |              |     |                 |         |
| 8   | insurance_1_8                                                               | No insurance                                                                                                                                                                                                                       |                                                                                                                                                                                                                                                                                                                                                                                                                                                                                                                                                                                                                                                                                                                                                                              |   |                                         |         |     |               |          |   |                 |          |       |               |                                  |   |               |                       |   |               |                                            |   |               |                        |   |               |              |     |                 |         |
| 999 | insurance_1_999                                                             | Unknown                                                                                                                                                                                                                            |                                                                                                                                                                                                                                                                                                                                                                                                                                                                                                                                                                                                                                                                                                                                                                              |   |                                         |         |     |               |          |   |                 |          |       |               |                                  |   |               |                       |   |               |                                            |   |               |                        |   |               |              |     |                 |         |
| 20  | cc                                                                          | <p><b>Section Header:</b> <i>RN/Triage</i></p> <p><b>Chief complaint</b></p> <p><i>Copy and paste from Wellsoft chart CC. Also use this space to specify "Other" from the ED Bridge Initial Encounter sheet if applicable.</i></p> | <p><b>notes, Required</b></p>                                                                                                                                                                                                                                                                                                                                                                                                                                                                                                                                                                                                                                                                                                                                                |   |                                         |         |     |               |          |   |                 |          |       |               |                                  |   |               |                       |   |               |                                            |   |               |                        |   |               |              |     |                 |         |
| 21  | mode_arrival                                                                | <p><b>Mode of arrival</b></p>                                                                                                                                                                                                      | <p><b>radio, Required</b></p> <table border="1" data-bbox="1047 955 1523 1270"> <tr> <td>1</td> <td>Ambulatory/ Private Vehicle/ Wheelchair</td> </tr> <tr> <td>2</td> <td>ALS</td> </tr> <tr> <td>3</td> <td>BLS</td> </tr> <tr> <td>4</td> <td>Law Enforcement</td> </tr> <tr> <td>5</td> <td>Other</td> </tr> <tr> <td>999</td> <td>None listed</td> </tr> </table>                                                                                                                                                                                                                                                                                                                                                                                                       | 1 | Ambulatory/ Private Vehicle/ Wheelchair | 2       | ALS | 3             | BLS      | 4 | Law Enforcement | 5        | Other | 999           | None listed                      |   |               |                       |   |               |                                            |   |               |                        |   |               |              |     |                 |         |
| 1   | Ambulatory/ Private Vehicle/ Wheelchair                                     |                                                                                                                                                                                                                                    |                                                                                                                                                                                                                                                                                                                                                                                                                                                                                                                                                                                                                                                                                                                                                                              |   |                                         |         |     |               |          |   |                 |          |       |               |                                  |   |               |                       |   |               |                                            |   |               |                        |   |               |              |     |                 |         |
| 2   | ALS                                                                         |                                                                                                                                                                                                                                    |                                                                                                                                                                                                                                                                                                                                                                                                                                                                                                                                                                                                                                                                                                                                                                              |   |                                         |         |     |               |          |   |                 |          |       |               |                                  |   |               |                       |   |               |                                            |   |               |                        |   |               |              |     |                 |         |
| 3   | BLS                                                                         |                                                                                                                                                                                                                                    |                                                                                                                                                                                                                                                                                                                                                                                                                                                                                                                                                                                                                                                                                                                                                                              |   |                                         |         |     |               |          |   |                 |          |       |               |                                  |   |               |                       |   |               |                                            |   |               |                        |   |               |              |     |                 |         |
| 4   | Law Enforcement                                                             |                                                                                                                                                                                                                                    |                                                                                                                                                                                                                                                                                                                                                                                                                                                                                                                                                                                                                                                                                                                                                                              |   |                                         |         |     |               |          |   |                 |          |       |               |                                  |   |               |                       |   |               |                                            |   |               |                        |   |               |              |     |                 |         |
| 5   | Other                                                                       |                                                                                                                                                                                                                                    |                                                                                                                                                                                                                                                                                                                                                                                                                                                                                                                                                                                                                                                                                                                                                                              |   |                                         |         |     |               |          |   |                 |          |       |               |                                  |   |               |                       |   |               |                                            |   |               |                        |   |               |              |     |                 |         |
| 999 | None listed                                                                 |                                                                                                                                                                                                                                    |                                                                                                                                                                                                                                                                                                                                                                                                                                                                                                                                                                                                                                                                                                                                                                              |   |                                         |         |     |               |          |   |                 |          |       |               |                                  |   |               |                       |   |               |                                            |   |               |                        |   |               |              |     |                 |         |
| 22  | <p>mode_arrival_oth</p> <p>Show the field ONLY if: [mode_arrival] = '5'</p> | <p>If "Other," please specify.</p>                                                                                                                                                                                                 | <p><b>text, Required</b></p>                                                                                                                                                                                                                                                                                                                                                                                                                                                                                                                                                                                                                                                                                                                                                 |   |                                         |         |     |               |          |   |                 |          |       |               |                                  |   |               |                       |   |               |                                            |   |               |                        |   |               |              |     |                 |         |
| 23  | ht                                                                          | <p><b>Pt's height (cm)</b><br/> <i>Enter 999 if not done this visit.</i></p>                                                                                                                                                       | <p><b>text, Required</b></p>                                                                                                                                                                                                                                                                                                                                                                                                                                                                                                                                                                                                                                                                                                                                                 |   |                                         |         |     |               |          |   |                 |          |       |               |                                  |   |               |                       |   |               |                                            |   |               |                        |   |               |              |     |                 |         |
| 24  | weight                                                                      | <p><b>Pt's weight (kg)</b><br/> <i>Enter 999 if not done this visit.</i></p>                                                                                                                                                       | <p><b>text, Required</b></p>                                                                                                                                                                                                                                                                                                                                                                                                                                                                                                                                                                                                                                                                                                                                                 |   |                                         |         |     |               |          |   |                 |          |       |               |                                  |   |               |                       |   |               |                                            |   |               |                        |   |               |              |     |                 |         |
| 25  | attending                                                                   | <p><b>Section Header:</b> <i>MD Chart</i></p> <p><b>MD ED</b><br/> <i>Last name and first initial, as it appears in the MD Chart section. Enter "N/A" if none listed.</i></p>                                                      | <p><b>text, Required</b></p>                                                                                                                                                                                                                                                                                                                                                                                                                                                                                                                                                                                                                                                                                                                                                 |   |                                         |         |     |               |          |   |                 |          |       |               |                                  |   |               |                       |   |               |                                            |   |               |                        |   |               |              |     |                 |         |
| 26  | res                                                                         | <p><b>Res/PA/NP</b><br/> <i>Last name and first initial, as it appears in the MD Chart section. Enter "N/A" if none listed.</i></p>                                                                                                | <p><b>text, Required</b></p>                                                                                                                                                                                                                                                                                                                                                                                                                                                                                                                                                                                                                                                                                                                                                 |   |                                         |         |     |               |          |   |                 |          |       |               |                                  |   |               |                       |   |               |                                            |   |               |                        |   |               |              |     |                 |         |
| 27  | bup_rx                                                                      | <p><b>Section Header:</b> <i>Script / Rx</i></p> <p><b>Was a prescription for buprenorphine given during the patient's ED visit? ****</b></p>                                                                                      | <p><b>radio, Required</b></p> <table border="1" data-bbox="1047 1843 1140 1936"> <tr> <td>1</td> <td>Yes</td> </tr> <tr> <td>0</td> <td>No</td> </tr> </table>                                                                                                                                                                                                                                                                                                                                                                                                                                                                                                                                                                                                               | 1 | Yes                                     | 0       | No  |               |          |   |                 |          |       |               |                                  |   |               |                       |   |               |                                            |   |               |                        |   |               |              |     |                 |         |
| 1   | Yes                                                                         |                                                                                                                                                                                                                                    |                                                                                                                                                                                                                                                                                                                                                                                                                                                                                                                                                                                                                                                                                                                                                                              |   |                                         |         |     |               |          |   |                 |          |       |               |                                  |   |               |                       |   |               |                                            |   |               |                        |   |               |              |     |                 |         |
| 0   | No                                                                          |                                                                                                                                                                                                                                    |                                                                                                                                                                                                                                                                                                                                                                                                                                                                                                                                                                                                                                                                                                                                                                              |   |                                         |         |     |               |          |   |                 |          |       |               |                                  |   |               |                       |   |               |                                            |   |               |                        |   |               |              |     |                 |         |

|     |                                                                                       |                                                                              |                                                                                                                                                                                                                                                                                                                                                                                                                                                                                                           |   |                        |   |               |   |     |   |      |   |     |   |    |   |     |   |     |   |       |     |         |    |       |     |         |
|-----|---------------------------------------------------------------------------------------|------------------------------------------------------------------------------|-----------------------------------------------------------------------------------------------------------------------------------------------------------------------------------------------------------------------------------------------------------------------------------------------------------------------------------------------------------------------------------------------------------------------------------------------------------------------------------------------------------|---|------------------------|---|---------------|---|-----|---|------|---|-----|---|----|---|-----|---|-----|---|-------|-----|---------|----|-------|-----|---------|
| 28  | <b>bup_rx_form</b><br>Show the field ONLY if:<br><b>[bup_rx] = '1'</b>                | <b>Formulation</b><br><i>Look under Rx 1, Rx 2, etc.</i>                     | <b>radio, Required</b><br><table border="1" data-bbox="1052 100 1377 195"> <tr> <td>1</td> <td>Buprenorphine/Naloxone</td> </tr> <tr> <td>2</td> <td>Buprenorphine</td> </tr> </table>                                                                                                                                                                                                                                                                                                                    | 1 | Buprenorphine/Naloxone | 2 | Buprenorphine |   |     |   |      |   |     |   |    |   |     |   |     |   |       |     |         |    |       |     |         |
| 1   | Buprenorphine/Naloxone                                                                |                                                                              |                                                                                                                                                                                                                                                                                                                                                                                                                                                                                                           |   |                        |   |               |   |     |   |      |   |     |   |    |   |     |   |     |   |       |     |         |    |       |     |         |
| 2   | Buprenorphine                                                                         |                                                                              |                                                                                                                                                                                                                                                                                                                                                                                                                                                                                                           |   |                        |   |               |   |     |   |      |   |     |   |    |   |     |   |     |   |       |     |         |    |       |     |         |
| 29  | <b>bup_rx_route</b><br>Show the field ONLY if:<br><b>[bup_rx] = '1'</b>               | <b>Route</b><br><i>From "Freq/Rte"</i>                                       | <b>radio, Required</b><br><table border="1" data-bbox="1052 247 1230 724"> <tr><td>1</td><td>SL</td></tr> <tr><td>2</td><td>BUCC</td></tr> <tr><td>3</td><td>TD</td></tr> <tr><td>4</td><td>IJ</td></tr> <tr><td>5</td><td>IV</td></tr> <tr><td>6</td><td>IM</td></tr> <tr><td>7</td><td>ID</td></tr> <tr><td>8</td><td>SQ</td></tr> <tr><td>9</td><td>Other</td></tr> <tr><td>999</td><td>Unknown</td></tr> </table>                                                                                     | 1 | SL                     | 2 | BUCC          | 3 | TD  | 4 | IJ   | 5 | IV  | 6 | IM | 7 | ID  | 8 | SQ  | 9 | Other | 999 | Unknown |    |       |     |         |
| 1   | SL                                                                                    |                                                                              |                                                                                                                                                                                                                                                                                                                                                                                                                                                                                                           |   |                        |   |               |   |     |   |      |   |     |   |    |   |     |   |     |   |       |     |         |    |       |     |         |
| 2   | BUCC                                                                                  |                                                                              |                                                                                                                                                                                                                                                                                                                                                                                                                                                                                                           |   |                        |   |               |   |     |   |      |   |     |   |    |   |     |   |     |   |       |     |         |    |       |     |         |
| 3   | TD                                                                                    |                                                                              |                                                                                                                                                                                                                                                                                                                                                                                                                                                                                                           |   |                        |   |               |   |     |   |      |   |     |   |    |   |     |   |     |   |       |     |         |    |       |     |         |
| 4   | IJ                                                                                    |                                                                              |                                                                                                                                                                                                                                                                                                                                                                                                                                                                                                           |   |                        |   |               |   |     |   |      |   |     |   |    |   |     |   |     |   |       |     |         |    |       |     |         |
| 5   | IV                                                                                    |                                                                              |                                                                                                                                                                                                                                                                                                                                                                                                                                                                                                           |   |                        |   |               |   |     |   |      |   |     |   |    |   |     |   |     |   |       |     |         |    |       |     |         |
| 6   | IM                                                                                    |                                                                              |                                                                                                                                                                                                                                                                                                                                                                                                                                                                                                           |   |                        |   |               |   |     |   |      |   |     |   |    |   |     |   |     |   |       |     |         |    |       |     |         |
| 7   | ID                                                                                    |                                                                              |                                                                                                                                                                                                                                                                                                                                                                                                                                                                                                           |   |                        |   |               |   |     |   |      |   |     |   |    |   |     |   |     |   |       |     |         |    |       |     |         |
| 8   | SQ                                                                                    |                                                                              |                                                                                                                                                                                                                                                                                                                                                                                                                                                                                                           |   |                        |   |               |   |     |   |      |   |     |   |    |   |     |   |     |   |       |     |         |    |       |     |         |
| 9   | Other                                                                                 |                                                                              |                                                                                                                                                                                                                                                                                                                                                                                                                                                                                                           |   |                        |   |               |   |     |   |      |   |     |   |    |   |     |   |     |   |       |     |         |    |       |     |         |
| 999 | Unknown                                                                               |                                                                              |                                                                                                                                                                                                                                                                                                                                                                                                                                                                                                           |   |                        |   |               |   |     |   |      |   |     |   |    |   |     |   |     |   |       |     |         |    |       |     |         |
| 30  | <b>bup_rx_route_oth</b><br>Show the field ONLY if:<br><b>[bup_rx_route] = '9'</b>     | <b>If "Other," please specify.</b>                                           | <b>text, Required</b>                                                                                                                                                                                                                                                                                                                                                                                                                                                                                     |   |                        |   |               |   |     |   |      |   |     |   |    |   |     |   |     |   |       |     |         |    |       |     |         |
| 31  | <b>bup_rx_combo_strength</b><br>Show the field ONLY if:<br><b>[bup_rx_form] = '1'</b> | <b>Strength (in mg buprenorphine/mg naloxone)</b><br><i>From "Dose/Conc"</i> | <b>radio, Required</b><br><table border="1" data-bbox="1052 951 1174 1119"> <tr><td>1</td><td>2/0.5</td></tr> <tr><td>2</td><td>4/1</td></tr> <tr><td>3</td><td>8/2</td></tr> <tr><td>4</td><td>12/3</td></tr> </table>                                                                                                                                                                                                                                                                                   | 1 | 2/0.5                  | 2 | 4/1           | 3 | 8/2 | 4 | 12/3 |   |     |   |    |   |     |   |     |   |       |     |         |    |       |     |         |
| 1   | 2/0.5                                                                                 |                                                                              |                                                                                                                                                                                                                                                                                                                                                                                                                                                                                                           |   |                        |   |               |   |     |   |      |   |     |   |    |   |     |   |     |   |       |     |         |    |       |     |         |
| 2   | 4/1                                                                                   |                                                                              |                                                                                                                                                                                                                                                                                                                                                                                                                                                                                                           |   |                        |   |               |   |     |   |      |   |     |   |    |   |     |   |     |   |       |     |         |    |       |     |         |
| 3   | 8/2                                                                                   |                                                                              |                                                                                                                                                                                                                                                                                                                                                                                                                                                                                                           |   |                        |   |               |   |     |   |      |   |     |   |    |   |     |   |     |   |       |     |         |    |       |     |         |
| 4   | 12/3                                                                                  |                                                                              |                                                                                                                                                                                                                                                                                                                                                                                                                                                                                                           |   |                        |   |               |   |     |   |      |   |     |   |    |   |     |   |     |   |       |     |         |    |       |     |         |
| 32  | <b>bup_rx_mono_strength</b><br>Show the field ONLY if:<br><b>[bup_rx_form] = '2'</b>  | <b>Strength (in mg)</b>                                                      | <b>radio, Required</b><br><table border="1" data-bbox="1052 1182 1117 1266"> <tr><td>1</td><td>2</td></tr> <tr><td>2</td><td>8</td></tr> </table>                                                                                                                                                                                                                                                                                                                                                         | 1 | 2                      | 2 | 8             |   |     |   |      |   |     |   |    |   |     |   |     |   |       |     |         |    |       |     |         |
| 1   | 2                                                                                     |                                                                              |                                                                                                                                                                                                                                                                                                                                                                                                                                                                                                           |   |                        |   |               |   |     |   |      |   |     |   |    |   |     |   |     |   |       |     |         |    |       |     |         |
| 2   | 8                                                                                     |                                                                              |                                                                                                                                                                                                                                                                                                                                                                                                                                                                                                           |   |                        |   |               |   |     |   |      |   |     |   |    |   |     |   |     |   |       |     |         |    |       |     |         |
| 33  | <b>bup_rx_freq</b><br>Show the field ONLY if:<br><b>[bup_rx] = '1'</b>                | <b>Frequency</b><br><i>From "Freq/Rte"</i>                                   | <b>radio, Required</b><br><table border="1" data-bbox="1052 1318 1295 1896"> <tr><td>1</td><td>QD</td></tr> <tr><td>2</td><td>Everyotherday</td></tr> <tr><td>3</td><td>BID</td></tr> <tr><td>4</td><td>TID</td></tr> <tr><td>5</td><td>QID</td></tr> <tr><td>6</td><td>QH</td></tr> <tr><td>7</td><td>QHS</td></tr> <tr><td>8</td><td>Q4h</td></tr> <tr><td>9</td><td>Q4-6h</td></tr> <tr><td>10</td><td>QWK</td></tr> <tr><td>11</td><td>Other</td></tr> <tr><td>999</td><td>Unknown</td></tr> </table> | 1 | QD                     | 2 | Everyotherday | 3 | BID | 4 | TID  | 5 | QID | 6 | QH | 7 | QHS | 8 | Q4h | 9 | Q4-6h | 10  | QWK     | 11 | Other | 999 | Unknown |
| 1   | QD                                                                                    |                                                                              |                                                                                                                                                                                                                                                                                                                                                                                                                                                                                                           |   |                        |   |               |   |     |   |      |   |     |   |    |   |     |   |     |   |       |     |         |    |       |     |         |
| 2   | Everyotherday                                                                         |                                                                              |                                                                                                                                                                                                                                                                                                                                                                                                                                                                                                           |   |                        |   |               |   |     |   |      |   |     |   |    |   |     |   |     |   |       |     |         |    |       |     |         |
| 3   | BID                                                                                   |                                                                              |                                                                                                                                                                                                                                                                                                                                                                                                                                                                                                           |   |                        |   |               |   |     |   |      |   |     |   |    |   |     |   |     |   |       |     |         |    |       |     |         |
| 4   | TID                                                                                   |                                                                              |                                                                                                                                                                                                                                                                                                                                                                                                                                                                                                           |   |                        |   |               |   |     |   |      |   |     |   |    |   |     |   |     |   |       |     |         |    |       |     |         |
| 5   | QID                                                                                   |                                                                              |                                                                                                                                                                                                                                                                                                                                                                                                                                                                                                           |   |                        |   |               |   |     |   |      |   |     |   |    |   |     |   |     |   |       |     |         |    |       |     |         |
| 6   | QH                                                                                    |                                                                              |                                                                                                                                                                                                                                                                                                                                                                                                                                                                                                           |   |                        |   |               |   |     |   |      |   |     |   |    |   |     |   |     |   |       |     |         |    |       |     |         |
| 7   | QHS                                                                                   |                                                                              |                                                                                                                                                                                                                                                                                                                                                                                                                                                                                                           |   |                        |   |               |   |     |   |      |   |     |   |    |   |     |   |     |   |       |     |         |    |       |     |         |
| 8   | Q4h                                                                                   |                                                                              |                                                                                                                                                                                                                                                                                                                                                                                                                                                                                                           |   |                        |   |               |   |     |   |      |   |     |   |    |   |     |   |     |   |       |     |         |    |       |     |         |
| 9   | Q4-6h                                                                                 |                                                                              |                                                                                                                                                                                                                                                                                                                                                                                                                                                                                                           |   |                        |   |               |   |     |   |      |   |     |   |    |   |     |   |     |   |       |     |         |    |       |     |         |
| 10  | QWK                                                                                   |                                                                              |                                                                                                                                                                                                                                                                                                                                                                                                                                                                                                           |   |                        |   |               |   |     |   |      |   |     |   |    |   |     |   |     |   |       |     |         |    |       |     |         |
| 11  | Other                                                                                 |                                                                              |                                                                                                                                                                                                                                                                                                                                                                                                                                                                                                           |   |                        |   |               |   |     |   |      |   |     |   |    |   |     |   |     |   |       |     |         |    |       |     |         |
| 999 | Unknown                                                                               |                                                                              |                                                                                                                                                                                                                                                                                                                                                                                                                                                                                                           |   |                        |   |               |   |     |   |      |   |     |   |    |   |     |   |     |   |       |     |         |    |       |     |         |
| 34  | <b>bup_rx_freq_oth</b><br>Show the field ONLY if:                                     | <b>[bup_rx_freq] = '11'</b>                                                  |                                                                                                                                                                                                                                                                                                                                                                                                                                                                                                           |   |                        |   |               |   |     |   |      |   |     |   |    |   |     |   |     |   |       |     |         |    |       |     |         |

**If "Other," please specify.**

**text, Required**

|     |                                                                                    |                                                                                              |                                                                                                                                                                                                                                                                                                                                                                                                                |   |                        |   |               |   |     |   |      |   |    |   |    |   |    |   |    |   |       |     |         |
|-----|------------------------------------------------------------------------------------|----------------------------------------------------------------------------------------------|----------------------------------------------------------------------------------------------------------------------------------------------------------------------------------------------------------------------------------------------------------------------------------------------------------------------------------------------------------------------------------------------------------------|---|------------------------|---|---------------|---|-----|---|------|---|----|---|----|---|----|---|----|---|-------|-----|---------|
| 35  | <b>bup_rx_num</b><br>Show the field ONLY if:<br>[bup_rx] = '1'                     | <b># of doses</b><br><i>From "Disp." Enter numerical value.</i>                              | text, Required                                                                                                                                                                                                                                                                                                                                                                                                 |   |                        |   |               |   |     |   |      |   |    |   |    |   |    |   |    |   |       |     |         |
| 36  | <b>mult_bup_rx</b><br>Show the field ONLY if:<br>[bup_rx] = '1'                    | <b>Was more than one prescription for buprenorphine given during the patient's ED visit?</b> | yesno, Required<br><table border="1"> <tr> <td>1</td> <td>Yes</td> </tr> <tr> <td>0</td> <td>No</td> </tr> </table>                                                                                                                                                                                                                                                                                            | 1 | Yes                    | 0 | No            |   |     |   |      |   |    |   |    |   |    |   |    |   |       |     |         |
| 1   | Yes                                                                                |                                                                                              |                                                                                                                                                                                                                                                                                                                                                                                                                |   |                        |   |               |   |     |   |      |   |    |   |    |   |    |   |    |   |       |     |         |
| 0   | No                                                                                 |                                                                                              |                                                                                                                                                                                                                                                                                                                                                                                                                |   |                        |   |               |   |     |   |      |   |    |   |    |   |    |   |    |   |       |     |         |
| 37  | <b>bup_rx_form_2</b><br>Show the field ONLY if:<br>[mult_bup_rx] = '1'             | <b>Formulation</b><br><i>Look under Rx 1, Rx 2, etc.</i>                                     | radio, Required<br><table border="1"> <tr> <td>1</td> <td>Buprenorphine/Naloxone</td> </tr> <tr> <td>2</td> <td>Buprenorphine</td> </tr> </table>                                                                                                                                                                                                                                                              | 1 | Buprenorphine/Naloxone | 2 | Buprenorphine |   |     |   |      |   |    |   |    |   |    |   |    |   |       |     |         |
| 1   | Buprenorphine/Naloxone                                                             |                                                                                              |                                                                                                                                                                                                                                                                                                                                                                                                                |   |                        |   |               |   |     |   |      |   |    |   |    |   |    |   |    |   |       |     |         |
| 2   | Buprenorphine                                                                      |                                                                                              |                                                                                                                                                                                                                                                                                                                                                                                                                |   |                        |   |               |   |     |   |      |   |    |   |    |   |    |   |    |   |       |     |         |
| 38  | <b>bup_rx_route_2</b><br>Show the field ONLY if:<br>[mult_bup_rx] = '1'            | <b>Route</b><br><i>From "Freq/Rte"</i>                                                       | radio, Required<br><table border="1"> <tr> <td>1</td> <td>SL</td> </tr> <tr> <td>2</td> <td>BUCC</td> </tr> <tr> <td>3</td> <td>TD</td> </tr> <tr> <td>4</td> <td>IJ</td> </tr> <tr> <td>5</td> <td>IV</td> </tr> <tr> <td>6</td> <td>IM</td> </tr> <tr> <td>7</td> <td>ID</td> </tr> <tr> <td>8</td> <td>SQ</td> </tr> <tr> <td>9</td> <td>Other</td> </tr> <tr> <td>999</td> <td>Unknown</td> </tr> </table> | 1 | SL                     | 2 | BUCC          | 3 | TD  | 4 | IJ   | 5 | IV | 6 | IM | 7 | ID | 8 | SQ | 9 | Other | 999 | Unknown |
| 1   | SL                                                                                 |                                                                                              |                                                                                                                                                                                                                                                                                                                                                                                                                |   |                        |   |               |   |     |   |      |   |    |   |    |   |    |   |    |   |       |     |         |
| 2   | BUCC                                                                               |                                                                                              |                                                                                                                                                                                                                                                                                                                                                                                                                |   |                        |   |               |   |     |   |      |   |    |   |    |   |    |   |    |   |       |     |         |
| 3   | TD                                                                                 |                                                                                              |                                                                                                                                                                                                                                                                                                                                                                                                                |   |                        |   |               |   |     |   |      |   |    |   |    |   |    |   |    |   |       |     |         |
| 4   | IJ                                                                                 |                                                                                              |                                                                                                                                                                                                                                                                                                                                                                                                                |   |                        |   |               |   |     |   |      |   |    |   |    |   |    |   |    |   |       |     |         |
| 5   | IV                                                                                 |                                                                                              |                                                                                                                                                                                                                                                                                                                                                                                                                |   |                        |   |               |   |     |   |      |   |    |   |    |   |    |   |    |   |       |     |         |
| 6   | IM                                                                                 |                                                                                              |                                                                                                                                                                                                                                                                                                                                                                                                                |   |                        |   |               |   |     |   |      |   |    |   |    |   |    |   |    |   |       |     |         |
| 7   | ID                                                                                 |                                                                                              |                                                                                                                                                                                                                                                                                                                                                                                                                |   |                        |   |               |   |     |   |      |   |    |   |    |   |    |   |    |   |       |     |         |
| 8   | SQ                                                                                 |                                                                                              |                                                                                                                                                                                                                                                                                                                                                                                                                |   |                        |   |               |   |     |   |      |   |    |   |    |   |    |   |    |   |       |     |         |
| 9   | Other                                                                              |                                                                                              |                                                                                                                                                                                                                                                                                                                                                                                                                |   |                        |   |               |   |     |   |      |   |    |   |    |   |    |   |    |   |       |     |         |
| 999 | Unknown                                                                            |                                                                                              |                                                                                                                                                                                                                                                                                                                                                                                                                |   |                        |   |               |   |     |   |      |   |    |   |    |   |    |   |    |   |       |     |         |
| 39  | <b>bup_rx_route_oth_2</b><br>Show the field ONLY if:<br>[bup_rx_route_2] = '9'     | If "Other," please specify.                                                                  | text, Required                                                                                                                                                                                                                                                                                                                                                                                                 |   |                        |   |               |   |     |   |      |   |    |   |    |   |    |   |    |   |       |     |         |
| 40  | <b>bup_rx_combo_strength_2</b><br>Show the field ONLY if:<br>[bup_rx_form_2] = '1' | <b>Strength (in mg buprenorphine/mg naloxone)</b><br><i>From "Dose/Conc"</i>                 | radio, Required<br><table border="1"> <tr> <td>1</td> <td>2/0.5</td> </tr> <tr> <td>2</td> <td>4/1</td> </tr> <tr> <td>3</td> <td>8/2</td> </tr> <tr> <td>4</td> <td>12/3</td> </tr> </table>                                                                                                                                                                                                                  | 1 | 2/0.5                  | 2 | 4/1           | 3 | 8/2 | 4 | 12/3 |   |    |   |    |   |    |   |    |   |       |     |         |
| 1   | 2/0.5                                                                              |                                                                                              |                                                                                                                                                                                                                                                                                                                                                                                                                |   |                        |   |               |   |     |   |      |   |    |   |    |   |    |   |    |   |       |     |         |
| 2   | 4/1                                                                                |                                                                                              |                                                                                                                                                                                                                                                                                                                                                                                                                |   |                        |   |               |   |     |   |      |   |    |   |    |   |    |   |    |   |       |     |         |
| 3   | 8/2                                                                                |                                                                                              |                                                                                                                                                                                                                                                                                                                                                                                                                |   |                        |   |               |   |     |   |      |   |    |   |    |   |    |   |    |   |       |     |         |
| 4   | 12/3                                                                               |                                                                                              |                                                                                                                                                                                                                                                                                                                                                                                                                |   |                        |   |               |   |     |   |      |   |    |   |    |   |    |   |    |   |       |     |         |
| 41  | <b>bup_rx_mono_strength_2</b><br>Show the field ONLY if:<br>[bup_rx_form_2] = '2'  | <b>Strength (in mg)</b>                                                                      | radio, Required<br><table border="1"> <tr> <td>1</td> <td>2</td> </tr> <tr> <td>2</td> <td>8</td> </tr> </table>                                                                                                                                                                                                                                                                                               | 1 | 2                      | 2 | 8             |   |     |   |      |   |    |   |    |   |    |   |    |   |       |     |         |
| 1   | 2                                                                                  |                                                                                              |                                                                                                                                                                                                                                                                                                                                                                                                                |   |                        |   |               |   |     |   |      |   |    |   |    |   |    |   |    |   |       |     |         |
| 2   | 8                                                                                  |                                                                                              |                                                                                                                                                                                                                                                                                                                                                                                                                |   |                        |   |               |   |     |   |      |   |    |   |    |   |    |   |    |   |       |     |         |

|     |                                                                                                                                                                                                             |                                                                                             |                                                                                                                                                                                                                                                                                                                                                                                                                                                                         |   |     |   |               |   |     |   |     |   |     |   |     |   |     |   |       |   |     |    |       |     |         |
|-----|-------------------------------------------------------------------------------------------------------------------------------------------------------------------------------------------------------------|---------------------------------------------------------------------------------------------|-------------------------------------------------------------------------------------------------------------------------------------------------------------------------------------------------------------------------------------------------------------------------------------------------------------------------------------------------------------------------------------------------------------------------------------------------------------------------|---|-----|---|---------------|---|-----|---|-----|---|-----|---|-----|---|-----|---|-------|---|-----|----|-------|-----|---------|
| 42  | <b>bup_rx_freq_2</b><br><br><b>Show the field ONLY if:</b><br><b>[mult_bup_rx] = '1'</b>                                                                                                                    | <b>Frequency</b><br><i>From "Freq/Rte"</i>                                                  | <b>radio, Required</b><br><table border="1" data-bbox="1047 115 1295 640"> <tr><td>1</td><td>QD</td></tr> <tr><td>2</td><td>Everyotherday</td></tr> <tr><td>3</td><td>BID</td></tr> <tr><td>4</td><td>TID</td></tr> <tr><td>5</td><td>QID</td></tr> <tr><td>6</td><td>QHS</td></tr> <tr><td>7</td><td>Q4h</td></tr> <tr><td>8</td><td>Q4-6h</td></tr> <tr><td>9</td><td>QWK</td></tr> <tr><td>10</td><td>Other</td></tr> <tr><td>999</td><td>Unknown</td></tr> </table> | 1 | QD  | 2 | Everyotherday | 3 | BID | 4 | TID | 5 | QID | 6 | QHS | 7 | Q4h | 8 | Q4-6h | 9 | QWK | 10 | Other | 999 | Unknown |
| 1   | QD                                                                                                                                                                                                          |                                                                                             |                                                                                                                                                                                                                                                                                                                                                                                                                                                                         |   |     |   |               |   |     |   |     |   |     |   |     |   |     |   |       |   |     |    |       |     |         |
| 2   | Everyotherday                                                                                                                                                                                               |                                                                                             |                                                                                                                                                                                                                                                                                                                                                                                                                                                                         |   |     |   |               |   |     |   |     |   |     |   |     |   |     |   |       |   |     |    |       |     |         |
| 3   | BID                                                                                                                                                                                                         |                                                                                             |                                                                                                                                                                                                                                                                                                                                                                                                                                                                         |   |     |   |               |   |     |   |     |   |     |   |     |   |     |   |       |   |     |    |       |     |         |
| 4   | TID                                                                                                                                                                                                         |                                                                                             |                                                                                                                                                                                                                                                                                                                                                                                                                                                                         |   |     |   |               |   |     |   |     |   |     |   |     |   |     |   |       |   |     |    |       |     |         |
| 5   | QID                                                                                                                                                                                                         |                                                                                             |                                                                                                                                                                                                                                                                                                                                                                                                                                                                         |   |     |   |               |   |     |   |     |   |     |   |     |   |     |   |       |   |     |    |       |     |         |
| 6   | QHS                                                                                                                                                                                                         |                                                                                             |                                                                                                                                                                                                                                                                                                                                                                                                                                                                         |   |     |   |               |   |     |   |     |   |     |   |     |   |     |   |       |   |     |    |       |     |         |
| 7   | Q4h                                                                                                                                                                                                         |                                                                                             |                                                                                                                                                                                                                                                                                                                                                                                                                                                                         |   |     |   |               |   |     |   |     |   |     |   |     |   |     |   |       |   |     |    |       |     |         |
| 8   | Q4-6h                                                                                                                                                                                                       |                                                                                             |                                                                                                                                                                                                                                                                                                                                                                                                                                                                         |   |     |   |               |   |     |   |     |   |     |   |     |   |     |   |       |   |     |    |       |     |         |
| 9   | QWK                                                                                                                                                                                                         |                                                                                             |                                                                                                                                                                                                                                                                                                                                                                                                                                                                         |   |     |   |               |   |     |   |     |   |     |   |     |   |     |   |       |   |     |    |       |     |         |
| 10  | Other                                                                                                                                                                                                       |                                                                                             |                                                                                                                                                                                                                                                                                                                                                                                                                                                                         |   |     |   |               |   |     |   |     |   |     |   |     |   |     |   |       |   |     |    |       |     |         |
| 999 | Unknown                                                                                                                                                                                                     |                                                                                             |                                                                                                                                                                                                                                                                                                                                                                                                                                                                         |   |     |   |               |   |     |   |     |   |     |   |     |   |     |   |       |   |     |    |       |     |         |
| 43  | <b>bup_rx_freq_oth_2</b><br><br><b>Show the field ONLY if:</b><br><b>[bup_rx_freq_2] = '10'</b>                                                                                                             | <b>If "Other," please specify.</b>                                                          | <b>text, Required</b>                                                                                                                                                                                                                                                                                                                                                                                                                                                   |   |     |   |               |   |     |   |     |   |     |   |     |   |     |   |       |   |     |    |       |     |         |
| 44  | <b>bup_rx_num_2</b><br><br><b>Show the field ONLY if:</b><br><b>[mult_bup_rx] = '1'</b>                                                                                                                     | <b># of doses</b><br><i>From "Disp." Enter numerical value.</i>                             | <b>text, Required</b>                                                                                                                                                                                                                                                                                                                                                                                                                                                   |   |     |   |               |   |     |   |     |   |     |   |     |   |     |   |       |   |     |    |       |     |         |
| 45  | <b>bup_prescriber</b><br><br><b>Show the field ONLY if:</b><br><b>[bup_rx] = '1'</b>                                                                                                                        | <b>Name the prescriber.</b><br><i>Copy and paste from "MD ED Last" in Wellsoft</i>          | <b>text, Required</b>                                                                                                                                                                                                                                                                                                                                                                                                                                                   |   |     |   |               |   |     |   |     |   |     |   |     |   |     |   |       |   |     |    |       |     |         |
| 46  | <b>other_rx</b>                                                                                                                                                                                             | <b>Was a medication prescribed to treat a co-occurring medical or psychiatric disorder?</b> | <b>yesno, Required</b><br><table border="1" data-bbox="1047 1081 1136 1176"> <tr><td>1</td><td>Yes</td></tr> <tr><td>0</td><td>No</td></tr> </table>                                                                                                                                                                                                                                                                                                                    | 1 | Yes | 0 | No            |   |     |   |     |   |     |   |     |   |     |   |       |   |     |    |       |     |         |
| 1   | Yes                                                                                                                                                                                                         |                                                                                             |                                                                                                                                                                                                                                                                                                                                                                                                                                                                         |   |     |   |               |   |     |   |     |   |     |   |     |   |     |   |       |   |     |    |       |     |         |
| 0   | No                                                                                                                                                                                                          |                                                                                             |                                                                                                                                                                                                                                                                                                                                                                                                                                                                         |   |     |   |               |   |     |   |     |   |     |   |     |   |     |   |       |   |     |    |       |     |         |
| 47  | <b>oth_rx_num</b><br><br><b>Show the field ONLY if:</b><br><b>[other_rx] = '1'</b>                                                                                                                          | <b>How many other medications were prescribed?</b><br><i>Not including buprenorphine</i>    | <b>radio, Required</b><br><table border="1" data-bbox="1047 1228 1117 1564"> <tr><td>1</td><td>1</td></tr> <tr><td>2</td><td>2</td></tr> <tr><td>3</td><td>3</td></tr> <tr><td>4</td><td>4</td></tr> <tr><td>5</td><td>5</td></tr> <tr><td>6</td><td>6</td></tr> <tr><td>7</td><td>7</td></tr> </table>                                                                                                                                                                 | 1 | 1   | 2 | 2             | 3 | 3   | 4 | 4   | 5 | 5   | 6 | 6   | 7 | 7   |   |       |   |     |    |       |     |         |
| 1   | 1                                                                                                                                                                                                           |                                                                                             |                                                                                                                                                                                                                                                                                                                                                                                                                                                                         |   |     |   |               |   |     |   |     |   |     |   |     |   |     |   |       |   |     |    |       |     |         |
| 2   | 2                                                                                                                                                                                                           |                                                                                             |                                                                                                                                                                                                                                                                                                                                                                                                                                                                         |   |     |   |               |   |     |   |     |   |     |   |     |   |     |   |       |   |     |    |       |     |         |
| 3   | 3                                                                                                                                                                                                           |                                                                                             |                                                                                                                                                                                                                                                                                                                                                                                                                                                                         |   |     |   |               |   |     |   |     |   |     |   |     |   |     |   |       |   |     |    |       |     |         |
| 4   | 4                                                                                                                                                                                                           |                                                                                             |                                                                                                                                                                                                                                                                                                                                                                                                                                                                         |   |     |   |               |   |     |   |     |   |     |   |     |   |     |   |       |   |     |    |       |     |         |
| 5   | 5                                                                                                                                                                                                           |                                                                                             |                                                                                                                                                                                                                                                                                                                                                                                                                                                                         |   |     |   |               |   |     |   |     |   |     |   |     |   |     |   |       |   |     |    |       |     |         |
| 6   | 6                                                                                                                                                                                                           |                                                                                             |                                                                                                                                                                                                                                                                                                                                                                                                                                                                         |   |     |   |               |   |     |   |     |   |     |   |     |   |     |   |       |   |     |    |       |     |         |
| 7   | 7                                                                                                                                                                                                           |                                                                                             |                                                                                                                                                                                                                                                                                                                                                                                                                                                                         |   |     |   |               |   |     |   |     |   |     |   |     |   |     |   |       |   |     |    |       |     |         |
| 48  | <b>oth_rx_1</b><br><br><b>Show the field ONLY if:</b><br><b>[oth_rx_num]='1' or [oth_h_rx_num]='2' or [oth_r_x_num]='3' or [oth_rx_num]='4' or [oth_rx_num]='5' or [oth_rx_num]='6' or [oth_rx_num]='7'</b> | <b>Please list the (first) medication prescribed.</b>                                       | <b>text, Required</b>                                                                                                                                                                                                                                                                                                                                                                                                                                                   |   |     |   |               |   |     |   |     |   |     |   |     |   |     |   |       |   |     |    |       |     |         |



|     |                                                                                                                                                                               |                                                                                                          |                                                                                                                                                                                                                                                                                                                                                                                                                                                                                                                                                                                                                                                                                                                                                   |   |                |              |   |                |                 |   |                |           |   |                |                        |   |                |                                       |   |                |            |   |                |                         |   |                |                 |     |                  |                   |
|-----|-------------------------------------------------------------------------------------------------------------------------------------------------------------------------------|----------------------------------------------------------------------------------------------------------|---------------------------------------------------------------------------------------------------------------------------------------------------------------------------------------------------------------------------------------------------------------------------------------------------------------------------------------------------------------------------------------------------------------------------------------------------------------------------------------------------------------------------------------------------------------------------------------------------------------------------------------------------------------------------------------------------------------------------------------------------|---|----------------|--------------|---|----------------|-----------------|---|----------------|-----------|---|----------------|------------------------|---|----------------|---------------------------------------|---|----------------|------------|---|----------------|-------------------------|---|----------------|-----------------|-----|------------------|-------------------|
| 49  | <b>oth_rx_2</b><br><br><b>Show the field ONLY if:</b><br>[oth_rx_num]='2' or [oth_rx_num]='3' or [oth_rx_num]='4' or [oth_rx_num]='5' or [oth_rx_num]='6' or [oth_rx_num]='7' | <b>Please list the second medication prescribed.</b>                                                     | <b>text, Required</b>                                                                                                                                                                                                                                                                                                                                                                                                                                                                                                                                                                                                                                                                                                                             |   |                |              |   |                |                 |   |                |           |   |                |                        |   |                |                                       |   |                |            |   |                |                         |   |                |                 |     |                  |                   |
| 50  | <b>oth_rx_3</b><br><br><b>Show the field ONLY if:</b><br>[oth_rx_num]='3' or [oth_rx_num]='4' or [oth_rx_num]='5' or [oth_rx_num]='6' or [oth_rx_num]='7'                     | <b>Please list the third medication prescribed.</b>                                                      | <b>text, Required</b>                                                                                                                                                                                                                                                                                                                                                                                                                                                                                                                                                                                                                                                                                                                             |   |                |              |   |                |                 |   |                |           |   |                |                        |   |                |                                       |   |                |            |   |                |                         |   |                |                 |     |                  |                   |
| 51  | <b>oth_rx_4</b><br><br><b>Show the field ONLY if:</b><br>[oth_rx_num]='4' or [oth_rx_num]='5' or [oth_rx_num]='6' or [oth_rx_num]='7'                                         | <b>Please list the fourth medication prescribed.</b>                                                     | <b>text, Required</b>                                                                                                                                                                                                                                                                                                                                                                                                                                                                                                                                                                                                                                                                                                                             |   |                |              |   |                |                 |   |                |           |   |                |                        |   |                |                                       |   |                |            |   |                |                         |   |                |                 |     |                  |                   |
| 52  | <b>oth_rx_5</b><br><br><b>Show the field ONLY if:</b><br>[oth_rx_num]='5' or [oth_rx_num]='6' or [oth_rx_num]='7'                                                             | <b>Please list the fifth medication prescribed.</b>                                                      | <b>text, Required</b>                                                                                                                                                                                                                                                                                                                                                                                                                                                                                                                                                                                                                                                                                                                             |   |                |              |   |                |                 |   |                |           |   |                |                        |   |                |                                       |   |                |            |   |                |                         |   |                |                 |     |                  |                   |
| 53  | <b>oth_rx_6</b><br><br><b>Show the field ONLY if:</b><br>[oth_rx_num]='6' or [oth_rx_num]='7'                                                                                 | <b>Please list the sixth medication prescribed.</b>                                                      | <b>text, Required</b>                                                                                                                                                                                                                                                                                                                                                                                                                                                                                                                                                                                                                                                                                                                             |   |                |              |   |                |                 |   |                |           |   |                |                        |   |                |                                       |   |                |            |   |                |                         |   |                |                 |     |                  |                   |
| 54  | <b>oth_rx_7</b><br><br><b>Show the field ONLY if:</b><br>[oth_rx_num]='7'                                                                                                     | <b>Please list the seventh medication prescribed.</b>                                                    | <b>text, Required</b>                                                                                                                                                                                                                                                                                                                                                                                                                                                                                                                                                                                                                                                                                                                             |   |                |              |   |                |                 |   |                |           |   |                |                        |   |                |                                       |   |                |            |   |                |                         |   |                |                 |     |                  |                   |
| 55  | <b>ancillary_rx</b><br><br><b>Show the field ONLY if:</b><br>[other_rx]='1'                                                                                                   | <b>Which of the following classes of medications was the patient prescribed during their E.D. visit?</b> | <b>checkbox, Required</b> <table border="1"> <tr> <td>1</td> <td>ancillary_rx_1</td> <td>Anti-emetics</td> </tr> <tr> <td>2</td> <td>ancillary_rx_2</td> <td>Anti-diarrheals</td> </tr> <tr> <td>3</td> <td>ancillary_rx_3</td> <td>Clonidine</td> </tr> <tr> <td>4</td> <td>ancillary_rx_4</td> <td>Non-opioid painkillers</td> </tr> <tr> <td>5</td> <td>ancillary_rx_5</td> <td>Opioids (not including buprenorphine)</td> </tr> <tr> <td>6</td> <td>ancillary_rx_6</td> <td>Gabapentin</td> </tr> <tr> <td>7</td> <td>ancillary_rx_7</td> <td>Psychiatric medications</td> </tr> <tr> <td>8</td> <td>ancillary_rx_8</td> <td>Benzodiazepines</td> </tr> <tr> <td>999</td> <td>ancillary_rx_999</td> <td>None of the above</td> </tr> </table> | 1 | ancillary_rx_1 | Anti-emetics | 2 | ancillary_rx_2 | Anti-diarrheals | 3 | ancillary_rx_3 | Clonidine | 4 | ancillary_rx_4 | Non-opioid painkillers | 5 | ancillary_rx_5 | Opioids (not including buprenorphine) | 6 | ancillary_rx_6 | Gabapentin | 7 | ancillary_rx_7 | Psychiatric medications | 8 | ancillary_rx_8 | Benzodiazepines | 999 | ancillary_rx_999 | None of the above |
| 1   | ancillary_rx_1                                                                                                                                                                | Anti-emetics                                                                                             |                                                                                                                                                                                                                                                                                                                                                                                                                                                                                                                                                                                                                                                                                                                                                   |   |                |              |   |                |                 |   |                |           |   |                |                        |   |                |                                       |   |                |            |   |                |                         |   |                |                 |     |                  |                   |
| 2   | ancillary_rx_2                                                                                                                                                                | Anti-diarrheals                                                                                          |                                                                                                                                                                                                                                                                                                                                                                                                                                                                                                                                                                                                                                                                                                                                                   |   |                |              |   |                |                 |   |                |           |   |                |                        |   |                |                                       |   |                |            |   |                |                         |   |                |                 |     |                  |                   |
| 3   | ancillary_rx_3                                                                                                                                                                | Clonidine                                                                                                |                                                                                                                                                                                                                                                                                                                                                                                                                                                                                                                                                                                                                                                                                                                                                   |   |                |              |   |                |                 |   |                |           |   |                |                        |   |                |                                       |   |                |            |   |                |                         |   |                |                 |     |                  |                   |
| 4   | ancillary_rx_4                                                                                                                                                                | Non-opioid painkillers                                                                                   |                                                                                                                                                                                                                                                                                                                                                                                                                                                                                                                                                                                                                                                                                                                                                   |   |                |              |   |                |                 |   |                |           |   |                |                        |   |                |                                       |   |                |            |   |                |                         |   |                |                 |     |                  |                   |
| 5   | ancillary_rx_5                                                                                                                                                                | Opioids (not including buprenorphine)                                                                    |                                                                                                                                                                                                                                                                                                                                                                                                                                                                                                                                                                                                                                                                                                                                                   |   |                |              |   |                |                 |   |                |           |   |                |                        |   |                |                                       |   |                |            |   |                |                         |   |                |                 |     |                  |                   |
| 6   | ancillary_rx_6                                                                                                                                                                | Gabapentin                                                                                               |                                                                                                                                                                                                                                                                                                                                                                                                                                                                                                                                                                                                                                                                                                                                                   |   |                |              |   |                |                 |   |                |           |   |                |                        |   |                |                                       |   |                |            |   |                |                         |   |                |                 |     |                  |                   |
| 7   | ancillary_rx_7                                                                                                                                                                | Psychiatric medications                                                                                  |                                                                                                                                                                                                                                                                                                                                                                                                                                                                                                                                                                                                                                                                                                                                                   |   |                |              |   |                |                 |   |                |           |   |                |                        |   |                |                                       |   |                |            |   |                |                         |   |                |                 |     |                  |                   |
| 8   | ancillary_rx_8                                                                                                                                                                | Benzodiazepines                                                                                          |                                                                                                                                                                                                                                                                                                                                                                                                                                                                                                                                                                                                                                                                                                                                                   |   |                |              |   |                |                 |   |                |           |   |                |                        |   |                |                                       |   |                |            |   |                |                         |   |                |                 |     |                  |                   |
| 999 | ancillary_rx_999                                                                                                                                                              | None of the above                                                                                        |                                                                                                                                                                                                                                                                                                                                                                                                                                                                                                                                                                                                                                                                                                                                                   |   |                |              |   |                |                 |   |                |           |   |                |                        |   |                |                                       |   |                |            |   |                |                         |   |                |                 |     |                  |                   |

|                                                      |                                                      |                                                                                                                                                                                                                                                     |                                                                                                                                                                                                                                                                                                                                                                                                                                                                                                         |   |            |   |            |   |             |   |            |   |              |   |                  |   |                           |   |        |   |                 |    |       |
|------------------------------------------------------|------------------------------------------------------|-----------------------------------------------------------------------------------------------------------------------------------------------------------------------------------------------------------------------------------------------------|---------------------------------------------------------------------------------------------------------------------------------------------------------------------------------------------------------------------------------------------------------------------------------------------------------------------------------------------------------------------------------------------------------------------------------------------------------------------------------------------------------|---|------------|---|------------|---|-------------|---|------------|---|--------------|---|------------------|---|---------------------------|---|--------|---|-----------------|----|-------|
| 56                                                   | moud_appt                                            | <b>Section Header: Dispo</b><br><b>Was an appointment or referral made for this patient's substance use disorder?</b><br><i>Look under "Dispo." Include Pain Clinic, Substance Use Clinic, Cherry Hill, and ED Bridge. Can back-ill from chart.</i> | <b>radio, Required</b><br><table border="1"> <tr> <td>1</td> <td>Yes</td> </tr> <tr> <td>0</td> <td>No</td> </tr> </table>                                                                                                                                                                                                                                                                                                                                                                              | 1 | Yes        | 0 | No         |   |             |   |            |   |              |   |                  |   |                           |   |        |   |                 |    |       |
| 1                                                    | Yes                                                  |                                                                                                                                                                                                                                                     |                                                                                                                                                                                                                                                                                                                                                                                                                                                                                                         |   |            |   |            |   |             |   |            |   |              |   |                  |   |                           |   |        |   |                 |    |       |
| 0                                                    | No                                                   |                                                                                                                                                                                                                                                     |                                                                                                                                                                                                                                                                                                                                                                                                                                                                                                         |   |            |   |            |   |             |   |            |   |              |   |                  |   |                           |   |        |   |                 |    |       |
| 57                                                   | disp                                                 | <b>Disposition</b>                                                                                                                                                                                                                                  | <b>radio, Required</b><br><table border="1"> <tr> <td>1</td> <td>Home</td> </tr> <tr> <td>2</td> <td>Admit</td> </tr> <tr> <td>3</td> <td>Eloped/ AMA</td> </tr> <tr> <td>4</td> <td>LWOT/ LWBS</td> </tr> <tr> <td>5</td> <td>Board &amp; Care</td> </tr> <tr> <td>6</td> <td>Transfer ( JGPH)</td> </tr> <tr> <td>7</td> <td>Transfer (Other hospital)</td> </tr> <tr> <td>8</td> <td>Morgue</td> </tr> <tr> <td>9</td> <td>Law Enforcement</td> </tr> <tr> <td>10</td> <td>Other</td> </tr> </table> | 1 | Home       | 2 | Admit      | 3 | Eloped/ AMA | 4 | LWOT/ LWBS | 5 | Board & Care | 6 | Transfer ( JGPH) | 7 | Transfer (Other hospital) | 8 | Morgue | 9 | Law Enforcement | 10 | Other |
| 1                                                    | Home                                                 |                                                                                                                                                                                                                                                     |                                                                                                                                                                                                                                                                                                                                                                                                                                                                                                         |   |            |   |            |   |             |   |            |   |              |   |                  |   |                           |   |        |   |                 |    |       |
| 2                                                    | Admit                                                |                                                                                                                                                                                                                                                     |                                                                                                                                                                                                                                                                                                                                                                                                                                                                                                         |   |            |   |            |   |             |   |            |   |              |   |                  |   |                           |   |        |   |                 |    |       |
| 3                                                    | Eloped/ AMA                                          |                                                                                                                                                                                                                                                     |                                                                                                                                                                                                                                                                                                                                                                                                                                                                                                         |   |            |   |            |   |             |   |            |   |              |   |                  |   |                           |   |        |   |                 |    |       |
| 4                                                    | LWOT/ LWBS                                           |                                                                                                                                                                                                                                                     |                                                                                                                                                                                                                                                                                                                                                                                                                                                                                                         |   |            |   |            |   |             |   |            |   |              |   |                  |   |                           |   |        |   |                 |    |       |
| 5                                                    | Board & Care                                         |                                                                                                                                                                                                                                                     |                                                                                                                                                                                                                                                                                                                                                                                                                                                                                                         |   |            |   |            |   |             |   |            |   |              |   |                  |   |                           |   |        |   |                 |    |       |
| 6                                                    | Transfer ( JGPH)                                     |                                                                                                                                                                                                                                                     |                                                                                                                                                                                                                                                                                                                                                                                                                                                                                                         |   |            |   |            |   |             |   |            |   |              |   |                  |   |                           |   |        |   |                 |    |       |
| 7                                                    | Transfer (Other hospital)                            |                                                                                                                                                                                                                                                     |                                                                                                                                                                                                                                                                                                                                                                                                                                                                                                         |   |            |   |            |   |             |   |            |   |              |   |                  |   |                           |   |        |   |                 |    |       |
| 8                                                    | Morgue                                               |                                                                                                                                                                                                                                                     |                                                                                                                                                                                                                                                                                                                                                                                                                                                                                                         |   |            |   |            |   |             |   |            |   |              |   |                  |   |                           |   |        |   |                 |    |       |
| 9                                                    | Law Enforcement                                      |                                                                                                                                                                                                                                                     |                                                                                                                                                                                                                                                                                                                                                                                                                                                                                                         |   |            |   |            |   |             |   |            |   |              |   |                  |   |                           |   |        |   |                 |    |       |
| 10                                                   | Other                                                |                                                                                                                                                                                                                                                     |                                                                                                                                                                                                                                                                                                                                                                                                                                                                                                         |   |            |   |            |   |             |   |            |   |              |   |                  |   |                           |   |        |   |                 |    |       |
| 58                                                   | disp_oth<br>Show the field ONLY if: [disp] = '10'    | <b>If "Other," please specify.</b>                                                                                                                                                                                                                  | <b>text, Required</b>                                                                                                                                                                                                                                                                                                                                                                                                                                                                                   |   |            |   |            |   |             |   |            |   |              |   |                  |   |                           |   |        |   |                 |    |       |
| 59                                                   | phone_1                                              | <b>Preferred Phone # ****</b><br><i>Enter 999 999 9999 if no contact number.</i>                                                                                                                                                                    | <b>text (phone), Required, Identifier</b>                                                                                                                                                                                                                                                                                                                                                                                                                                                               |   |            |   |            |   |             |   |            |   |              |   |                  |   |                           |   |        |   |                 |    |       |
| 60                                                   | disp_date                                            | <b>Disposition date</b>                                                                                                                                                                                                                             | <b>text (date_mdy), Required, Identifier</b>                                                                                                                                                                                                                                                                                                                                                                                                                                                            |   |            |   |            |   |             |   |            |   |              |   |                  |   |                           |   |        |   |                 |    |       |
| 61                                                   | disp_time                                            | <b>Disposition time</b><br><i>Military time. xx:xx</i>                                                                                                                                                                                              | <b>text (time), Required</b>                                                                                                                                                                                                                                                                                                                                                                                                                                                                            |   |            |   |            |   |             |   |            |   |              |   |                  |   |                           |   |        |   |                 |    |       |
| 62                                                   | wellsoft_chart_tab_complete                          | <b>Section Header: Form Status</b><br><b>Complete?</b>                                                                                                                                                                                              | <b>dropdown</b><br><table border="1"> <tr> <td>0</td> <td>Incomplete</td> </tr> <tr> <td>1</td> <td>Unverified</td> </tr> <tr> <td>2</td> <td>Complete</td> </tr> </table>                                                                                                                                                                                                                                                                                                                              | 0 | Incomplete | 1 | Unverified | 2 | Complete    |   |            |   |              |   |                  |   |                           |   |        |   |                 |    |       |
| 0                                                    | Incomplete                                           |                                                                                                                                                                                                                                                     |                                                                                                                                                                                                                                                                                                                                                                                                                                                                                                         |   |            |   |            |   |             |   |            |   |              |   |                  |   |                           |   |        |   |                 |    |       |
| 1                                                    | Unverified                                           |                                                                                                                                                                                                                                                     |                                                                                                                                                                                                                                                                                                                                                                                                                                                                                                         |   |            |   |            |   |             |   |            |   |              |   |                  |   |                           |   |        |   |                 |    |       |
| 2                                                    | Complete                                             |                                                                                                                                                                                                                                                     |                                                                                                                                                                                                                                                                                                                                                                                                                                                                                                         |   |            |   |            |   |             |   |            |   |              |   |                  |   |                           |   |        |   |                 |    |       |
| <b>Instrument: ED Visit Vitals (ed_visit_vitals)</b> |                                                      |                                                                                                                                                                                                                                                     |                                                                                                                                                                                                                                                                                                                                                                                                                                                                                                         |   |            |   |            |   |             |   |            |   |              |   |                  |   |                           |   |        |   |                 |    |       |
| 63                                                   | sbp_triage                                           | <b>Triage systolic blood pressure</b><br><i>First recorded SBP. Look in "Vitals."</i>                                                                                                                                                               | <b>text (integer, Min: 0, Max: 300), Required</b>                                                                                                                                                                                                                                                                                                                                                                                                                                                       |   |            |   |            |   |             |   |            |   |              |   |                  |   |                           |   |        |   |                 |    |       |
| 64                                                   | mult_sbp                                             | <b>Was more than one systolic blood pressure measurement recorded for this visit?</b>                                                                                                                                                               | <b>radio, Required</b><br><table border="1"> <tr> <td>1</td> <td>Yes</td> </tr> <tr> <td>0</td> <td>No</td> </tr> </table>                                                                                                                                                                                                                                                                                                                                                                              | 1 | Yes        | 0 | No         |   |             |   |            |   |              |   |                  |   |                           |   |        |   |                 |    |       |
| 1                                                    | Yes                                                  |                                                                                                                                                                                                                                                     |                                                                                                                                                                                                                                                                                                                                                                                                                                                                                                         |   |            |   |            |   |             |   |            |   |              |   |                  |   |                           |   |        |   |                 |    |       |
| 0                                                    | No                                                   |                                                                                                                                                                                                                                                     |                                                                                                                                                                                                                                                                                                                                                                                                                                                                                                         |   |            |   |            |   |             |   |            |   |              |   |                  |   |                           |   |        |   |                 |    |       |
| 65                                                   | sbp_max<br>Show the field ONLY if: [mult_sbp] = '1'  | <b>Maximum systolic blood pressure</b>                                                                                                                                                                                                              | <b>text (integer, Min: 0, Max: 300), Required</b>                                                                                                                                                                                                                                                                                                                                                                                                                                                       |   |            |   |            |   |             |   |            |   |              |   |                  |   |                           |   |        |   |                 |    |       |
| 66                                                   | sbp_min<br>Show the field ONLY if: [mult_sbp] = '1'  | <b>Minimum systolic blood pressure</b>                                                                                                                                                                                                              | <b>text (integer, Min: 0, Max: 300), Required</b>                                                                                                                                                                                                                                                                                                                                                                                                                                                       |   |            |   |            |   |             |   |            |   |              |   |                  |   |                           |   |        |   |                 |    |       |
| 67                                                   | sbp_last<br>Show the field ONLY if: [mult_sbp] = '1' | <b>Last systolic blood pressure before discharge</b><br><i>Last recorded SBP.</i>                                                                                                                                                                   | <b>text (integer, Min: 0, Max: 300), Required</b>                                                                                                                                                                                                                                                                                                                                                                                                                                                       |   |            |   |            |   |             |   |            |   |              |   |                  |   |                           |   |        |   |                 |    |       |
| 68                                                   | dbp_triage                                           | <b>Triage diastolic blood pressure</b>                                                                                                                                                                                                              | <b>text (integer, Min: 0, Max: 300), Required</b>                                                                                                                                                                                                                                                                                                                                                                                                                                                       |   |            |   |            |   |             |   |            |   |              |   |                  |   |                           |   |        |   |                 |    |       |

|    |                                                              |                                                                                                                           |                                                                                                                            |   |     |   |    |
|----|--------------------------------------------------------------|---------------------------------------------------------------------------------------------------------------------------|----------------------------------------------------------------------------------------------------------------------------|---|-----|---|----|
| 69 | <b>hr_triage</b>                                             | <b>Triage heart rate (bpm)</b><br><i>First record pulse. Look in "Vitals."</i>                                            | <b>text (integer, Min: 0, Max: 300), Required</b>                                                                          |   |     |   |    |
| 70 | <b>mult_hr</b>                                               | <b>Was more than one heart rate recorded for this visit?</b>                                                              | <b>radio, Required</b><br><table border="1"> <tr> <td>1</td> <td>Yes</td> </tr> <tr> <td>0</td> <td>No</td> </tr> </table> | 1 | Yes | 0 | No |
| 1  | Yes                                                          |                                                                                                                           |                                                                                                                            |   |     |   |    |
| 0  | No                                                           |                                                                                                                           |                                                                                                                            |   |     |   |    |
| 71 | <b>hr_max</b><br>Show the field ONLY if:<br>[mult_hr] = '1'  | <b>Maximum heart rate (bpm)</b>                                                                                           | <b>text (integer, Min: 0, Max: 300), Required</b>                                                                          |   |     |   |    |
| 72 | <b>hr_min</b><br>Show the field ONLY if:<br>[mult_hr] = '1'  | <b>Minimum heart rate (bpm)</b>                                                                                           | <b>text (integer, Min: 0, Max: 300), Required</b>                                                                          |   |     |   |    |
| 73 | <b>hr_last</b><br>Show the field ONLY if:<br>[mult_hr] = '1' | <b>Last heart rate (bpm) before discharge</b><br><i>Last recorded pulse.</i>                                              | <b>text (integer, Min: 0, Max: 300), Required</b>                                                                          |   |     |   |    |
| 74 | <b>rr_triage</b>                                             | <b>Triage respiratory rate</b>                                                                                            | <b>text (integer, Min: 0, Max: 300), Required</b>                                                                          |   |     |   |    |
| 75 | <b>mult_rr</b>                                               | <b>Was more than one respiratory rate recorded for this visit?</b>                                                        | <b>yesno, Required</b><br><table border="1"> <tr> <td>1</td> <td>Yes</td> </tr> <tr> <td>0</td> <td>No</td> </tr> </table> | 1 | Yes | 0 | No |
| 1  | Yes                                                          |                                                                                                                           |                                                                                                                            |   |     |   |    |
| 0  | No                                                           |                                                                                                                           |                                                                                                                            |   |     |   |    |
| 76 | <b>rr_max</b><br>Show the field ONLY if:<br>[mult_rr] = '1'  | <b>Maximum respiratory rate</b>                                                                                           | <b>text, Required</b>                                                                                                      |   |     |   |    |
| 77 | <b>rr_min</b><br>Show the field ONLY if:<br>[mult_rr] = '1'  | <b>Minimum respiratory rate</b>                                                                                           | <b>text, Required</b>                                                                                                      |   |     |   |    |
| 78 | <b>rr_last</b><br>Show the field ONLY if:<br>[mult_rr] = '1' | <b>Last respiratory rate before discharge</b>                                                                             | <b>text, Required</b>                                                                                                      |   |     |   |    |
| 79 | <b>o2_triage</b>                                             | <b>Triage oxygen saturation (%)</b><br><i>Enter numerical value only (no %). First recorded O2 sat. Look in "Vitals."</i> | <b>text (integer, Min: 0, Max: 100), Required</b>                                                                          |   |     |   |    |
| 80 | <b>mult_o2</b>                                               | <b>Was more than one oxygen saturation measurement recorded for this visit?</b>                                           | <b>yesno, Required</b><br><table border="1"> <tr> <td>1</td> <td>Yes</td> </tr> <tr> <td>0</td> <td>No</td> </tr> </table> | 1 | Yes | 0 | No |
| 1  | Yes                                                          |                                                                                                                           |                                                                                                                            |   |     |   |    |
| 0  | No                                                           |                                                                                                                           |                                                                                                                            |   |     |   |    |
| 81 | <b>o2_max</b><br>Show the field ONLY if:<br>[mult_o2] = '1'  | <b>Maximum oxygen saturation (%)</b><br><i>Enter numerical value only (no%)</i>                                           | <b>text, Required</b>                                                                                                      |   |     |   |    |
| 82 | <b>o2_min</b><br>Show the field ONLY if:<br>[mult_o2] = '1'  | <b>Minimum oxygen saturation (%)</b><br><i>Enter numerical value only (no %)</i>                                          | <b>text (integer, Min: 0, Max: 100), Required</b>                                                                          |   |     |   |    |
| 83 | <b>o2_last</b><br>Show the field ONLY if:<br>[mult_o2] = '1' | <b>Last oxygen saturation before discharge (%)</b><br><i>Enter numerical value only (no %). Last recorded O2 sat.</i>     | <b>text (integer, Min: 0, Max: 100), Required</b>                                                                          |   |     |   |    |

|     |                                                                                   |                                                                                                      |                                                                                                                                                                                                                                                                                                                                                                                                                                                                      |   |     |   |    |   |   |   |   |   |   |   |   |   |   |   |   |   |   |   |   |    |    |     |     |
|-----|-----------------------------------------------------------------------------------|------------------------------------------------------------------------------------------------------|----------------------------------------------------------------------------------------------------------------------------------------------------------------------------------------------------------------------------------------------------------------------------------------------------------------------------------------------------------------------------------------------------------------------------------------------------------------------|---|-----|---|----|---|---|---|---|---|---|---|---|---|---|---|---|---|---|---|---|----|----|-----|-----|
| 84  | nprs                                                                              | <b>Triage Numeric Pain Rating Scale (or any available)</b><br><i>Choose 999 if no NPRS recorded.</i> | <b>dropdown, Required</b><br><table border="1" data-bbox="1047 100 1170 678"> <tr><td>0</td><td>0</td></tr> <tr><td>1</td><td>1</td></tr> <tr><td>2</td><td>2</td></tr> <tr><td>3</td><td>3</td></tr> <tr><td>4</td><td>4</td></tr> <tr><td>5</td><td>5</td></tr> <tr><td>6</td><td>6</td></tr> <tr><td>7</td><td>7</td></tr> <tr><td>8</td><td>8</td></tr> <tr><td>9</td><td>9</td></tr> <tr><td>10</td><td>10</td></tr> <tr><td>999</td><td>999</td></tr> </table> | 0 | 0   | 1 | 1  | 2 | 2 | 3 | 3 | 4 | 4 | 5 | 5 | 6 | 6 | 7 | 7 | 8 | 8 | 9 | 9 | 10 | 10 | 999 | 999 |
| 0   | 0                                                                                 |                                                                                                      |                                                                                                                                                                                                                                                                                                                                                                                                                                                                      |   |     |   |    |   |   |   |   |   |   |   |   |   |   |   |   |   |   |   |   |    |    |     |     |
| 1   | 1                                                                                 |                                                                                                      |                                                                                                                                                                                                                                                                                                                                                                                                                                                                      |   |     |   |    |   |   |   |   |   |   |   |   |   |   |   |   |   |   |   |   |    |    |     |     |
| 2   | 2                                                                                 |                                                                                                      |                                                                                                                                                                                                                                                                                                                                                                                                                                                                      |   |     |   |    |   |   |   |   |   |   |   |   |   |   |   |   |   |   |   |   |    |    |     |     |
| 3   | 3                                                                                 |                                                                                                      |                                                                                                                                                                                                                                                                                                                                                                                                                                                                      |   |     |   |    |   |   |   |   |   |   |   |   |   |   |   |   |   |   |   |   |    |    |     |     |
| 4   | 4                                                                                 |                                                                                                      |                                                                                                                                                                                                                                                                                                                                                                                                                                                                      |   |     |   |    |   |   |   |   |   |   |   |   |   |   |   |   |   |   |   |   |    |    |     |     |
| 5   | 5                                                                                 |                                                                                                      |                                                                                                                                                                                                                                                                                                                                                                                                                                                                      |   |     |   |    |   |   |   |   |   |   |   |   |   |   |   |   |   |   |   |   |    |    |     |     |
| 6   | 6                                                                                 |                                                                                                      |                                                                                                                                                                                                                                                                                                                                                                                                                                                                      |   |     |   |    |   |   |   |   |   |   |   |   |   |   |   |   |   |   |   |   |    |    |     |     |
| 7   | 7                                                                                 |                                                                                                      |                                                                                                                                                                                                                                                                                                                                                                                                                                                                      |   |     |   |    |   |   |   |   |   |   |   |   |   |   |   |   |   |   |   |   |    |    |     |     |
| 8   | 8                                                                                 |                                                                                                      |                                                                                                                                                                                                                                                                                                                                                                                                                                                                      |   |     |   |    |   |   |   |   |   |   |   |   |   |   |   |   |   |   |   |   |    |    |     |     |
| 9   | 9                                                                                 |                                                                                                      |                                                                                                                                                                                                                                                                                                                                                                                                                                                                      |   |     |   |    |   |   |   |   |   |   |   |   |   |   |   |   |   |   |   |   |    |    |     |     |
| 10  | 10                                                                                |                                                                                                      |                                                                                                                                                                                                                                                                                                                                                                                                                                                                      |   |     |   |    |   |   |   |   |   |   |   |   |   |   |   |   |   |   |   |   |    |    |     |     |
| 999 | 999                                                                               |                                                                                                      |                                                                                                                                                                                                                                                                                                                                                                                                                                                                      |   |     |   |    |   |   |   |   |   |   |   |   |   |   |   |   |   |   |   |   |    |    |     |     |
| 85  | mult_nprs                                                                         | <b>Was more than one Numeric Pain Rating Scale recorded for this visit?</b>                          | <b>yesno, Required</b><br><table border="1" data-bbox="1047 730 1138 825"> <tr><td>1</td><td>Yes</td></tr> <tr><td>0</td><td>No</td></tr> </table>                                                                                                                                                                                                                                                                                                                   | 1 | Yes | 0 | No |   |   |   |   |   |   |   |   |   |   |   |   |   |   |   |   |    |    |     |     |
| 1   | Yes                                                                               |                                                                                                      |                                                                                                                                                                                                                                                                                                                                                                                                                                                                      |   |     |   |    |   |   |   |   |   |   |   |   |   |   |   |   |   |   |   |   |    |    |     |     |
| 0   | No                                                                                |                                                                                                      |                                                                                                                                                                                                                                                                                                                                                                                                                                                                      |   |     |   |    |   |   |   |   |   |   |   |   |   |   |   |   |   |   |   |   |    |    |     |     |
| 86  | <b>nprs_max</b><br><br><b>Show the field ONLY if:</b><br><b>[mult_nprs] = '1'</b> | <b>Maximum Numeric Pain Rating Scale</b>                                                             | <b>dropdown, Required</b><br><table border="1" data-bbox="1047 919 1138 1444"> <tr><td>0</td><td>0</td></tr> <tr><td>1</td><td>1</td></tr> <tr><td>2</td><td>2</td></tr> <tr><td>3</td><td>3</td></tr> <tr><td>4</td><td>4</td></tr> <tr><td>5</td><td>5</td></tr> <tr><td>6</td><td>6</td></tr> <tr><td>7</td><td>7</td></tr> <tr><td>8</td><td>8</td></tr> <tr><td>9</td><td>9</td></tr> <tr><td>10</td><td>10</td></tr> </table>                                  | 0 | 0   | 1 | 1  | 2 | 2 | 3 | 3 | 4 | 4 | 5 | 5 | 6 | 6 | 7 | 7 | 8 | 8 | 9 | 9 | 10 | 10 |     |     |
| 0   | 0                                                                                 |                                                                                                      |                                                                                                                                                                                                                                                                                                                                                                                                                                                                      |   |     |   |    |   |   |   |   |   |   |   |   |   |   |   |   |   |   |   |   |    |    |     |     |
| 1   | 1                                                                                 |                                                                                                      |                                                                                                                                                                                                                                                                                                                                                                                                                                                                      |   |     |   |    |   |   |   |   |   |   |   |   |   |   |   |   |   |   |   |   |    |    |     |     |
| 2   | 2                                                                                 |                                                                                                      |                                                                                                                                                                                                                                                                                                                                                                                                                                                                      |   |     |   |    |   |   |   |   |   |   |   |   |   |   |   |   |   |   |   |   |    |    |     |     |
| 3   | 3                                                                                 |                                                                                                      |                                                                                                                                                                                                                                                                                                                                                                                                                                                                      |   |     |   |    |   |   |   |   |   |   |   |   |   |   |   |   |   |   |   |   |    |    |     |     |
| 4   | 4                                                                                 |                                                                                                      |                                                                                                                                                                                                                                                                                                                                                                                                                                                                      |   |     |   |    |   |   |   |   |   |   |   |   |   |   |   |   |   |   |   |   |    |    |     |     |
| 5   | 5                                                                                 |                                                                                                      |                                                                                                                                                                                                                                                                                                                                                                                                                                                                      |   |     |   |    |   |   |   |   |   |   |   |   |   |   |   |   |   |   |   |   |    |    |     |     |
| 6   | 6                                                                                 |                                                                                                      |                                                                                                                                                                                                                                                                                                                                                                                                                                                                      |   |     |   |    |   |   |   |   |   |   |   |   |   |   |   |   |   |   |   |   |    |    |     |     |
| 7   | 7                                                                                 |                                                                                                      |                                                                                                                                                                                                                                                                                                                                                                                                                                                                      |   |     |   |    |   |   |   |   |   |   |   |   |   |   |   |   |   |   |   |   |    |    |     |     |
| 8   | 8                                                                                 |                                                                                                      |                                                                                                                                                                                                                                                                                                                                                                                                                                                                      |   |     |   |    |   |   |   |   |   |   |   |   |   |   |   |   |   |   |   |   |    |    |     |     |
| 9   | 9                                                                                 |                                                                                                      |                                                                                                                                                                                                                                                                                                                                                                                                                                                                      |   |     |   |    |   |   |   |   |   |   |   |   |   |   |   |   |   |   |   |   |    |    |     |     |
| 10  | 10                                                                                |                                                                                                      |                                                                                                                                                                                                                                                                                                                                                                                                                                                                      |   |     |   |    |   |   |   |   |   |   |   |   |   |   |   |   |   |   |   |   |    |    |     |     |
| 87  | <b>nprs_min</b><br><br><b>Show the field ONLY if:</b><br><b>[mult_nprs] = '1'</b> | <b>Minimum Numeric Pain Rating Scale</b>                                                             | <b>dropdown, Required</b><br><table border="1" data-bbox="1047 1497 1138 2022"> <tr><td>0</td><td>0</td></tr> <tr><td>1</td><td>1</td></tr> <tr><td>2</td><td>2</td></tr> <tr><td>3</td><td>3</td></tr> <tr><td>4</td><td>4</td></tr> <tr><td>5</td><td>5</td></tr> <tr><td>6</td><td>6</td></tr> <tr><td>7</td><td>7</td></tr> <tr><td>8</td><td>8</td></tr> <tr><td>9</td><td>9</td></tr> <tr><td>10</td><td>10</td></tr> </table>                                 | 0 | 0   | 1 | 1  | 2 | 2 | 3 | 3 | 4 | 4 | 5 | 5 | 6 | 6 | 7 | 7 | 8 | 8 | 9 | 9 | 10 | 10 |     |     |
| 0   | 0                                                                                 |                                                                                                      |                                                                                                                                                                                                                                                                                                                                                                                                                                                                      |   |     |   |    |   |   |   |   |   |   |   |   |   |   |   |   |   |   |   |   |    |    |     |     |
| 1   | 1                                                                                 |                                                                                                      |                                                                                                                                                                                                                                                                                                                                                                                                                                                                      |   |     |   |    |   |   |   |   |   |   |   |   |   |   |   |   |   |   |   |   |    |    |     |     |
| 2   | 2                                                                                 |                                                                                                      |                                                                                                                                                                                                                                                                                                                                                                                                                                                                      |   |     |   |    |   |   |   |   |   |   |   |   |   |   |   |   |   |   |   |   |    |    |     |     |
| 3   | 3                                                                                 |                                                                                                      |                                                                                                                                                                                                                                                                                                                                                                                                                                                                      |   |     |   |    |   |   |   |   |   |   |   |   |   |   |   |   |   |   |   |   |    |    |     |     |
| 4   | 4                                                                                 |                                                                                                      |                                                                                                                                                                                                                                                                                                                                                                                                                                                                      |   |     |   |    |   |   |   |   |   |   |   |   |   |   |   |   |   |   |   |   |    |    |     |     |
| 5   | 5                                                                                 |                                                                                                      |                                                                                                                                                                                                                                                                                                                                                                                                                                                                      |   |     |   |    |   |   |   |   |   |   |   |   |   |   |   |   |   |   |   |   |    |    |     |     |
| 6   | 6                                                                                 |                                                                                                      |                                                                                                                                                                                                                                                                                                                                                                                                                                                                      |   |     |   |    |   |   |   |   |   |   |   |   |   |   |   |   |   |   |   |   |    |    |     |     |
| 7   | 7                                                                                 |                                                                                                      |                                                                                                                                                                                                                                                                                                                                                                                                                                                                      |   |     |   |    |   |   |   |   |   |   |   |   |   |   |   |   |   |   |   |   |    |    |     |     |
| 8   | 8                                                                                 |                                                                                                      |                                                                                                                                                                                                                                                                                                                                                                                                                                                                      |   |     |   |    |   |   |   |   |   |   |   |   |   |   |   |   |   |   |   |   |    |    |     |     |
| 9   | 9                                                                                 |                                                                                                      |                                                                                                                                                                                                                                                                                                                                                                                                                                                                      |   |     |   |    |   |   |   |   |   |   |   |   |   |   |   |   |   |   |   |   |    |    |     |     |
| 10  | 10                                                                                |                                                                                                      |                                                                                                                                                                                                                                                                                                                                                                                                                                                                      |   |     |   |    |   |   |   |   |   |   |   |   |   |   |   |   |   |   |   |   |    |    |     |     |

|    |                                                                  |                                                        |                                                                                                                                                                                                                                                                                                                                                                                                      |   |            |   |            |   |          |   |   |   |   |   |   |   |   |   |   |   |   |   |   |    |    |
|----|------------------------------------------------------------------|--------------------------------------------------------|------------------------------------------------------------------------------------------------------------------------------------------------------------------------------------------------------------------------------------------------------------------------------------------------------------------------------------------------------------------------------------------------------|---|------------|---|------------|---|----------|---|---|---|---|---|---|---|---|---|---|---|---|---|---|----|----|
| 88 | <b>nprs_last</b><br>Show the field ONLY if:<br>[mult_nprs] = '1' | <b>Last Numeric Pain Rating Scale before discharge</b> | <b>dropdown, Required</b><br><table border="1"> <tr><td>0</td><td>0</td></tr> <tr><td>1</td><td>1</td></tr> <tr><td>2</td><td>2</td></tr> <tr><td>3</td><td>3</td></tr> <tr><td>4</td><td>4</td></tr> <tr><td>5</td><td>5</td></tr> <tr><td>6</td><td>6</td></tr> <tr><td>7</td><td>7</td></tr> <tr><td>8</td><td>8</td></tr> <tr><td>9</td><td>9</td></tr> <tr><td>10</td><td>10</td></tr> </table> | 0 | 0          | 1 | 1          | 2 | 2        | 3 | 3 | 4 | 4 | 5 | 5 | 6 | 6 | 7 | 7 | 8 | 8 | 9 | 9 | 10 | 10 |
| 0  | 0                                                                |                                                        |                                                                                                                                                                                                                                                                                                                                                                                                      |   |            |   |            |   |          |   |   |   |   |   |   |   |   |   |   |   |   |   |   |    |    |
| 1  | 1                                                                |                                                        |                                                                                                                                                                                                                                                                                                                                                                                                      |   |            |   |            |   |          |   |   |   |   |   |   |   |   |   |   |   |   |   |   |    |    |
| 2  | 2                                                                |                                                        |                                                                                                                                                                                                                                                                                                                                                                                                      |   |            |   |            |   |          |   |   |   |   |   |   |   |   |   |   |   |   |   |   |    |    |
| 3  | 3                                                                |                                                        |                                                                                                                                                                                                                                                                                                                                                                                                      |   |            |   |            |   |          |   |   |   |   |   |   |   |   |   |   |   |   |   |   |    |    |
| 4  | 4                                                                |                                                        |                                                                                                                                                                                                                                                                                                                                                                                                      |   |            |   |            |   |          |   |   |   |   |   |   |   |   |   |   |   |   |   |   |    |    |
| 5  | 5                                                                |                                                        |                                                                                                                                                                                                                                                                                                                                                                                                      |   |            |   |            |   |          |   |   |   |   |   |   |   |   |   |   |   |   |   |   |    |    |
| 6  | 6                                                                |                                                        |                                                                                                                                                                                                                                                                                                                                                                                                      |   |            |   |            |   |          |   |   |   |   |   |   |   |   |   |   |   |   |   |   |    |    |
| 7  | 7                                                                |                                                        |                                                                                                                                                                                                                                                                                                                                                                                                      |   |            |   |            |   |          |   |   |   |   |   |   |   |   |   |   |   |   |   |   |    |    |
| 8  | 8                                                                |                                                        |                                                                                                                                                                                                                                                                                                                                                                                                      |   |            |   |            |   |          |   |   |   |   |   |   |   |   |   |   |   |   |   |   |    |    |
| 9  | 9                                                                |                                                        |                                                                                                                                                                                                                                                                                                                                                                                                      |   |            |   |            |   |          |   |   |   |   |   |   |   |   |   |   |   |   |   |   |    |    |
| 10 | 10                                                               |                                                        |                                                                                                                                                                                                                                                                                                                                                                                                      |   |            |   |            |   |          |   |   |   |   |   |   |   |   |   |   |   |   |   |   |    |    |
| 89 | <b>ed_visit_vitals_complete</b>                                  | <b>Section Header: Form Status Complete?</b>           | <b>dropdown</b><br><table border="1"> <tr><td>0</td><td>Incomplete</td></tr> <tr><td>1</td><td>Unverified</td></tr> <tr><td>2</td><td>Complete</td></tr> </table>                                                                                                                                                                                                                                    | 0 | Incomplete | 1 | Unverified | 2 | Complete |   |   |   |   |   |   |   |   |   |   |   |   |   |   |    |    |
| 0  | Incomplete                                                       |                                                        |                                                                                                                                                                                                                                                                                                                                                                                                      |   |            |   |            |   |          |   |   |   |   |   |   |   |   |   |   |   |   |   |   |    |    |
| 1  | Unverified                                                       |                                                        |                                                                                                                                                                                                                                                                                                                                                                                                      |   |            |   |            |   |          |   |   |   |   |   |   |   |   |   |   |   |   |   |   |    |    |
| 2  | Complete                                                         |                                                        |                                                                                                                                                                                                                                                                                                                                                                                                      |   |            |   |            |   |          |   |   |   |   |   |   |   |   |   |   |   |   |   |   |    |    |

**Instrument: Provider Notes and ED Buprenorphine (provider\_notes\_and\_ed\_buprenorphine)**

|    |                    |                                                                                               |                                                                                                                                                                                                                                                                                                                                                                                                                                                                                                                                                                                                                                                                                                                                                                                                                                                                                                                                                                                                                           |   |               |                   |   |               |          |   |               |                             |   |               |                                             |   |               |                                                    |   |               |                            |   |               |              |   |               |               |   |               |                                    |    |                |                                                                   |    |                |                                                                       |
|----|--------------------|-----------------------------------------------------------------------------------------------|---------------------------------------------------------------------------------------------------------------------------------------------------------------------------------------------------------------------------------------------------------------------------------------------------------------------------------------------------------------------------------------------------------------------------------------------------------------------------------------------------------------------------------------------------------------------------------------------------------------------------------------------------------------------------------------------------------------------------------------------------------------------------------------------------------------------------------------------------------------------------------------------------------------------------------------------------------------------------------------------------------------------------|---|---------------|-------------------|---|---------------|----------|---|---------------|-----------------------------|---|---------------|---------------------------------------------|---|---------------|----------------------------------------------------|---|---------------|----------------------------|---|---------------|--------------|---|---------------|---------------|---|---------------|------------------------------------|----|----------------|-------------------------------------------------------------------|----|----------------|-----------------------------------------------------------------------|
| 90 | <b>ed_reason_1</b> | <b>Reason for ED visit ****</b><br><i>Complete based on provider notes in Wellsoft chart.</i> | <b>checkbox, Required</b><br><table border="1"> <tr><td>1</td><td>ed_reason_1_1</td><td>Opioid withdrawal</td></tr> <tr><td>2</td><td>ed_reason_1_2</td><td>Overdose</td></tr> <tr><td>3</td><td>ed_reason_1_3</td><td>Seeking buprenorphine/detox</td></tr> <tr><td>4</td><td>ed_reason_1_4</td><td>Non-opioid substance use (EtOH, stimulants)</td></tr> <tr><td>5</td><td>ed_reason_1_5</td><td>Non-opioid substance withdrawal (EtOH, stimulants)</td></tr> <tr><td>6</td><td>ed_reason_1_6</td><td>SSTI (abscess, cellulitis)</td></tr> <tr><td>7</td><td>ed_reason_1_7</td><td>Endocarditis</td></tr> <tr><td>8</td><td>ed_reason_1_8</td><td>Osteomyelitis</td></tr> <tr><td>9</td><td>ed_reason_1_9</td><td>Pain management (acute or chronic)</td></tr> <tr><td>10</td><td>ed_reason_1_10</td><td>Psychiatric symptoms (depression, anxiety, psych med refill, etc)</td></tr> <tr><td>11</td><td>ed_reason_1_11</td><td>Other medical visit (trauma, med refill, respiratory infection, etc.)</td></tr> </table> | 1 | ed_reason_1_1 | Opioid withdrawal | 2 | ed_reason_1_2 | Overdose | 3 | ed_reason_1_3 | Seeking buprenorphine/detox | 4 | ed_reason_1_4 | Non-opioid substance use (EtOH, stimulants) | 5 | ed_reason_1_5 | Non-opioid substance withdrawal (EtOH, stimulants) | 6 | ed_reason_1_6 | SSTI (abscess, cellulitis) | 7 | ed_reason_1_7 | Endocarditis | 8 | ed_reason_1_8 | Osteomyelitis | 9 | ed_reason_1_9 | Pain management (acute or chronic) | 10 | ed_reason_1_10 | Psychiatric symptoms (depression, anxiety, psych med refill, etc) | 11 | ed_reason_1_11 | Other medical visit (trauma, med refill, respiratory infection, etc.) |
| 1  | ed_reason_1_1      | Opioid withdrawal                                                                             |                                                                                                                                                                                                                                                                                                                                                                                                                                                                                                                                                                                                                                                                                                                                                                                                                                                                                                                                                                                                                           |   |               |                   |   |               |          |   |               |                             |   |               |                                             |   |               |                                                    |   |               |                            |   |               |              |   |               |               |   |               |                                    |    |                |                                                                   |    |                |                                                                       |
| 2  | ed_reason_1_2      | Overdose                                                                                      |                                                                                                                                                                                                                                                                                                                                                                                                                                                                                                                                                                                                                                                                                                                                                                                                                                                                                                                                                                                                                           |   |               |                   |   |               |          |   |               |                             |   |               |                                             |   |               |                                                    |   |               |                            |   |               |              |   |               |               |   |               |                                    |    |                |                                                                   |    |                |                                                                       |
| 3  | ed_reason_1_3      | Seeking buprenorphine/detox                                                                   |                                                                                                                                                                                                                                                                                                                                                                                                                                                                                                                                                                                                                                                                                                                                                                                                                                                                                                                                                                                                                           |   |               |                   |   |               |          |   |               |                             |   |               |                                             |   |               |                                                    |   |               |                            |   |               |              |   |               |               |   |               |                                    |    |                |                                                                   |    |                |                                                                       |
| 4  | ed_reason_1_4      | Non-opioid substance use (EtOH, stimulants)                                                   |                                                                                                                                                                                                                                                                                                                                                                                                                                                                                                                                                                                                                                                                                                                                                                                                                                                                                                                                                                                                                           |   |               |                   |   |               |          |   |               |                             |   |               |                                             |   |               |                                                    |   |               |                            |   |               |              |   |               |               |   |               |                                    |    |                |                                                                   |    |                |                                                                       |
| 5  | ed_reason_1_5      | Non-opioid substance withdrawal (EtOH, stimulants)                                            |                                                                                                                                                                                                                                                                                                                                                                                                                                                                                                                                                                                                                                                                                                                                                                                                                                                                                                                                                                                                                           |   |               |                   |   |               |          |   |               |                             |   |               |                                             |   |               |                                                    |   |               |                            |   |               |              |   |               |               |   |               |                                    |    |                |                                                                   |    |                |                                                                       |
| 6  | ed_reason_1_6      | SSTI (abscess, cellulitis)                                                                    |                                                                                                                                                                                                                                                                                                                                                                                                                                                                                                                                                                                                                                                                                                                                                                                                                                                                                                                                                                                                                           |   |               |                   |   |               |          |   |               |                             |   |               |                                             |   |               |                                                    |   |               |                            |   |               |              |   |               |               |   |               |                                    |    |                |                                                                   |    |                |                                                                       |
| 7  | ed_reason_1_7      | Endocarditis                                                                                  |                                                                                                                                                                                                                                                                                                                                                                                                                                                                                                                                                                                                                                                                                                                                                                                                                                                                                                                                                                                                                           |   |               |                   |   |               |          |   |               |                             |   |               |                                             |   |               |                                                    |   |               |                            |   |               |              |   |               |               |   |               |                                    |    |                |                                                                   |    |                |                                                                       |
| 8  | ed_reason_1_8      | Osteomyelitis                                                                                 |                                                                                                                                                                                                                                                                                                                                                                                                                                                                                                                                                                                                                                                                                                                                                                                                                                                                                                                                                                                                                           |   |               |                   |   |               |          |   |               |                             |   |               |                                             |   |               |                                                    |   |               |                            |   |               |              |   |               |               |   |               |                                    |    |                |                                                                   |    |                |                                                                       |
| 9  | ed_reason_1_9      | Pain management (acute or chronic)                                                            |                                                                                                                                                                                                                                                                                                                                                                                                                                                                                                                                                                                                                                                                                                                                                                                                                                                                                                                                                                                                                           |   |               |                   |   |               |          |   |               |                             |   |               |                                             |   |               |                                                    |   |               |                            |   |               |              |   |               |               |   |               |                                    |    |                |                                                                   |    |                |                                                                       |
| 10 | ed_reason_1_10     | Psychiatric symptoms (depression, anxiety, psych med refill, etc)                             |                                                                                                                                                                                                                                                                                                                                                                                                                                                                                                                                                                                                                                                                                                                                                                                                                                                                                                                                                                                                                           |   |               |                   |   |               |          |   |               |                             |   |               |                                             |   |               |                                                    |   |               |                            |   |               |              |   |               |               |   |               |                                    |    |                |                                                                   |    |                |                                                                       |
| 11 | ed_reason_1_11     | Other medical visit (trauma, med refill, respiratory infection, etc.)                         |                                                                                                                                                                                                                                                                                                                                                                                                                                                                                                                                                                                                                                                                                                                                                                                                                                                                                                                                                                                                                           |   |               |                   |   |               |          |   |               |                             |   |               |                                             |   |               |                                                    |   |               |                            |   |               |              |   |               |               |   |               |                                    |    |                |                                                                   |    |                |                                                                       |

|     |                                                                                       |                                                                                                                                                             |                                                                                                                                                                                                                                                                                                                                                                                                                                                                                                                                                                                                      |   |                   |         |                      |                   |                                           |     |                          |                                         |                     |                   |                     |   |           |   |                            |   |                |    |                |    |       |
|-----|---------------------------------------------------------------------------------------|-------------------------------------------------------------------------------------------------------------------------------------------------------------|------------------------------------------------------------------------------------------------------------------------------------------------------------------------------------------------------------------------------------------------------------------------------------------------------------------------------------------------------------------------------------------------------------------------------------------------------------------------------------------------------------------------------------------------------------------------------------------------------|---|-------------------|---------|----------------------|-------------------|-------------------------------------------|-----|--------------------------|-----------------------------------------|---------------------|-------------------|---------------------|---|-----------|---|----------------------------|---|----------------|----|----------------|----|-------|
| 91  | <b>moud</b><br><br><b>Show the field ONLY if:</b><br><b>[ed_reason_1(3)] = '1'</b>    | <b>If "Seeking buprenorphine/detox," which of the following best describes the patient's ED visit?</b>                                                      | <b>radio, Required</b><br><table border="1" data-bbox="1047 115 1364 304"> <tr><td>1</td><td>Bup Start</td></tr> <tr><td>2</td><td>Bup Lapse Prevention</td></tr> <tr><td>3</td><td>Bup Restart</td></tr> <tr><td>999</td><td>Unclear</td></tr> </table>                                                                                                                                                                                                                                                                                                                                             | 1 | Bup Start         | 2       | Bup Lapse Prevention | 3                 | Bup Restart                               | 999 | Unclear                  |                                         |                     |                   |                     |   |           |   |                            |   |                |    |                |    |       |
| 1   | Bup Start                                                                             |                                                                                                                                                             |                                                                                                                                                                                                                                                                                                                                                                                                                                                                                                                                                                                                      |   |                   |         |                      |                   |                                           |     |                          |                                         |                     |                   |                     |   |           |   |                            |   |                |    |                |    |       |
| 2   | Bup Lapse Prevention                                                                  |                                                                                                                                                             |                                                                                                                                                                                                                                                                                                                                                                                                                                                                                                                                                                                                      |   |                   |         |                      |                   |                                           |     |                          |                                         |                     |                   |                     |   |           |   |                            |   |                |    |                |    |       |
| 3   | Bup Restart                                                                           |                                                                                                                                                             |                                                                                                                                                                                                                                                                                                                                                                                                                                                                                                                                                                                                      |   |                   |         |                      |                   |                                           |     |                          |                                         |                     |                   |                     |   |           |   |                            |   |                |    |                |    |       |
| 999 | Unclear                                                                               |                                                                                                                                                             |                                                                                                                                                                                                                                                                                                                                                                                                                                                                                                                                                                                                      |   |                   |         |                      |                   |                                           |     |                          |                                         |                     |                   |                     |   |           |   |                            |   |                |    |                |    |       |
| 92  | <b>rn_triage</b>                                                                      | <b>Section Header: Clinical Notes</b><br><b>RN triage HPI from Wellsoft</b><br><i>Copy and paste triage RN note.</i>                                        | <b>notes, Required</b>                                                                                                                                                                                                                                                                                                                                                                                                                                                                                                                                                                               |   |                   |         |                      |                   |                                           |     |                          |                                         |                     |                   |                     |   |           |   |                            |   |                |    |                |    |       |
| 93  | <b>referral_yn</b>                                                                    | <b>Was the patient referred to Highland for this ED visit?</b>                                                                                              | <b>yesno, Required</b><br><table border="1" data-bbox="1047 472 1136 562"> <tr><td>1</td><td>Yes</td></tr> <tr><td>0</td><td>No</td></tr> </table>                                                                                                                                                                                                                                                                                                                                                                                                                                                   | 1 | Yes               | 0       | No                   |                   |                                           |     |                          |                                         |                     |                   |                     |   |           |   |                            |   |                |    |                |    |       |
| 1   | Yes                                                                                   |                                                                                                                                                             |                                                                                                                                                                                                                                                                                                                                                                                                                                                                                                                                                                                                      |   |                   |         |                      |                   |                                           |     |                          |                                         |                     |                   |                     |   |           |   |                            |   |                |    |                |    |       |
| 0   | No                                                                                    |                                                                                                                                                             |                                                                                                                                                                                                                                                                                                                                                                                                                                                                                                                                                                                                      |   |                   |         |                      |                   |                                           |     |                          |                                         |                     |                   |                     |   |           |   |                            |   |                |    |                |    |       |
| 94  | <b>referral</b><br><br><b>Show the field ONLY if:</b><br><b>[referral_yn] = '1'</b>   | <b>Where was the patient referred from?</b>                                                                                                                 | <b>radio, Required</b><br><table border="1" data-bbox="1047 615 1425 1144"> <tr><td>1</td><td>Another ED</td></tr> <tr><td>2</td><td>Cherry Hill</td></tr> <tr><td>3</td><td>Sober living environment</td></tr> <tr><td>4</td><td>Family/friends/co-worker</td></tr> <tr><td>5</td><td>Signage/advertising</td></tr> <tr><td>6</td><td>Primary care doctor</td></tr> <tr><td>7</td><td>Counselor</td></tr> <tr><td>8</td><td>Law enforcement/drug court</td></tr> <tr><td>9</td><td>Other hospital</td></tr> <tr><td>10</td><td>Psychiatry/JGP</td></tr> <tr><td>11</td><td>Other</td></tr> </table> | 1 | Another ED        | 2       | Cherry Hill          | 3                 | Sober living environment                  | 4   | Family/friends/co-worker | 5                                       | Signage/advertising | 6                 | Primary care doctor | 7 | Counselor | 8 | Law enforcement/drug court | 9 | Other hospital | 10 | Psychiatry/JGP | 11 | Other |
| 1   | Another ED                                                                            |                                                                                                                                                             |                                                                                                                                                                                                                                                                                                                                                                                                                                                                                                                                                                                                      |   |                   |         |                      |                   |                                           |     |                          |                                         |                     |                   |                     |   |           |   |                            |   |                |    |                |    |       |
| 2   | Cherry Hill                                                                           |                                                                                                                                                             |                                                                                                                                                                                                                                                                                                                                                                                                                                                                                                                                                                                                      |   |                   |         |                      |                   |                                           |     |                          |                                         |                     |                   |                     |   |           |   |                            |   |                |    |                |    |       |
| 3   | Sober living environment                                                              |                                                                                                                                                             |                                                                                                                                                                                                                                                                                                                                                                                                                                                                                                                                                                                                      |   |                   |         |                      |                   |                                           |     |                          |                                         |                     |                   |                     |   |           |   |                            |   |                |    |                |    |       |
| 4   | Family/friends/co-worker                                                              |                                                                                                                                                             |                                                                                                                                                                                                                                                                                                                                                                                                                                                                                                                                                                                                      |   |                   |         |                      |                   |                                           |     |                          |                                         |                     |                   |                     |   |           |   |                            |   |                |    |                |    |       |
| 5   | Signage/advertising                                                                   |                                                                                                                                                             |                                                                                                                                                                                                                                                                                                                                                                                                                                                                                                                                                                                                      |   |                   |         |                      |                   |                                           |     |                          |                                         |                     |                   |                     |   |           |   |                            |   |                |    |                |    |       |
| 6   | Primary care doctor                                                                   |                                                                                                                                                             |                                                                                                                                                                                                                                                                                                                                                                                                                                                                                                                                                                                                      |   |                   |         |                      |                   |                                           |     |                          |                                         |                     |                   |                     |   |           |   |                            |   |                |    |                |    |       |
| 7   | Counselor                                                                             |                                                                                                                                                             |                                                                                                                                                                                                                                                                                                                                                                                                                                                                                                                                                                                                      |   |                   |         |                      |                   |                                           |     |                          |                                         |                     |                   |                     |   |           |   |                            |   |                |    |                |    |       |
| 8   | Law enforcement/drug court                                                            |                                                                                                                                                             |                                                                                                                                                                                                                                                                                                                                                                                                                                                                                                                                                                                                      |   |                   |         |                      |                   |                                           |     |                          |                                         |                     |                   |                     |   |           |   |                            |   |                |    |                |    |       |
| 9   | Other hospital                                                                        |                                                                                                                                                             |                                                                                                                                                                                                                                                                                                                                                                                                                                                                                                                                                                                                      |   |                   |         |                      |                   |                                           |     |                          |                                         |                     |                   |                     |   |           |   |                            |   |                |    |                |    |       |
| 10  | Psychiatry/JGP                                                                        |                                                                                                                                                             |                                                                                                                                                                                                                                                                                                                                                                                                                                                                                                                                                                                                      |   |                   |         |                      |                   |                                           |     |                          |                                         |                     |                   |                     |   |           |   |                            |   |                |    |                |    |       |
| 11  | Other                                                                                 |                                                                                                                                                             |                                                                                                                                                                                                                                                                                                                                                                                                                                                                                                                                                                                                      |   |                   |         |                      |                   |                                           |     |                          |                                         |                     |                   |                     |   |           |   |                            |   |                |    |                |    |       |
| 95  | <b>referall_oth</b><br><br><b>Show the field ONLY if:</b><br><b>[referral] = '11'</b> | <b>If "Other," please specify.</b>                                                                                                                          | <b>text, Required</b>                                                                                                                                                                                                                                                                                                                                                                                                                                                                                                                                                                                |   |                   |         |                      |                   |                                           |     |                          |                                         |                     |                   |                     |   |           |   |                            |   |                |    |                |    |       |
| 96  | <b>prebup_sedation</b>                                                                | <b>Section Header: Pre-Bup Sedation</b><br><b>Which of the following signs or symptoms of sedation were documented before buprenorphine administration?</b> | <b>checkbox, Required</b><br><table border="1" data-bbox="1047 1329 1523 1682"> <tr> <td>1</td> <td>prebup_sedation_1</td> <td>Nodding</td> </tr> <tr> <td>2</td> <td>prebup_sedation_2</td> <td>Sleepy, drowsy, diffi culty staying awake</td> </tr> <tr> <td>3</td> <td>prebup_sedation_3</td> <td>Feelings of general fatigue or weakness</td> </tr> <tr> <td>0</td> <td>prebup_sedation_0</td> <td>None of the above</td> </tr> </table>                                                                                                                                                         | 1 | prebup_sedation_1 | Nodding | 2                    | prebup_sedation_2 | Sleepy, drowsy, diffi culty staying awake | 3   | prebup_sedation_3        | Feelings of general fatigue or weakness | 0                   | prebup_sedation_0 | None of the above   |   |           |   |                            |   |                |    |                |    |       |
| 1   | prebup_sedation_1                                                                     | Nodding                                                                                                                                                     |                                                                                                                                                                                                                                                                                                                                                                                                                                                                                                                                                                                                      |   |                   |         |                      |                   |                                           |     |                          |                                         |                     |                   |                     |   |           |   |                            |   |                |    |                |    |       |
| 2   | prebup_sedation_2                                                                     | Sleepy, drowsy, diffi culty staying awake                                                                                                                   |                                                                                                                                                                                                                                                                                                                                                                                                                                                                                                                                                                                                      |   |                   |         |                      |                   |                                           |     |                          |                                         |                     |                   |                     |   |           |   |                            |   |                |    |                |    |       |
| 3   | prebup_sedation_3                                                                     | Feelings of general fatigue or weakness                                                                                                                     |                                                                                                                                                                                                                                                                                                                                                                                                                                                                                                                                                                                                      |   |                   |         |                      |                   |                                           |     |                          |                                         |                     |                   |                     |   |           |   |                            |   |                |    |                |    |       |
| 0   | prebup_sedation_0                                                                     | None of the above                                                                                                                                           |                                                                                                                                                                                                                                                                                                                                                                                                                                                                                                                                                                                                      |   |                   |         |                      |                   |                                           |     |                          |                                         |                     |                   |                     |   |           |   |                            |   |                |    |                |    |       |

|    |                  |                                                                                                                                                                                       |                                                                                                                                                                                                                                                                                                                                                                                                                                                                                                                                                                                                                                                                                                                                                                                                                                                                                                                                                                                                                                                                                      |   |                  |                                     |   |                  |                                        |   |                  |               |   |                  |                |   |                  |                   |   |                |                   |   |                |                     |   |                |      |   |                |          |    |                 |         |    |                 |                           |    |                 |                              |    |                 |                  |   |                |                   |
|----|------------------|---------------------------------------------------------------------------------------------------------------------------------------------------------------------------------------|--------------------------------------------------------------------------------------------------------------------------------------------------------------------------------------------------------------------------------------------------------------------------------------------------------------------------------------------------------------------------------------------------------------------------------------------------------------------------------------------------------------------------------------------------------------------------------------------------------------------------------------------------------------------------------------------------------------------------------------------------------------------------------------------------------------------------------------------------------------------------------------------------------------------------------------------------------------------------------------------------------------------------------------------------------------------------------------|---|------------------|-------------------------------------|---|------------------|----------------------------------------|---|------------------|---------------|---|------------------|----------------|---|------------------|-------------------|---|----------------|-------------------|---|----------------|---------------------|---|----------------|------|---|----------------|----------|----|-----------------|---------|----|-----------------|---------------------------|----|-----------------|------------------------------|----|-----------------|------------------|---|----------------|-------------------|
| 97 | prebup_intox     | <p><b>Section Header:</b> <i>Pre-Bup Intoxication</i></p> <p><b>Which of the following signs or symptoms of intoxication were documented before buprenorphine administration?</b></p> | <p><b>checkbox, Required</b></p> <table border="1"> <tr> <td>1</td> <td>prebup_intox_1</td> <td>Good mood</td> </tr> <tr> <td>2</td> <td>prebup_intox_2</td> <td>Coasting (Spaced out)</td> </tr> <tr> <td>3</td> <td>prebup_intox_3</td> <td>Pleasant Sick</td> </tr> <tr> <td>4</td> <td>prebup_intox_4</td> <td>Drive (energy)</td> </tr> <tr> <td>5</td> <td>prebup_intox_5</td> <td>High</td> </tr> <tr> <td>6</td> <td>prebup_intox_6</td> <td>Drunken</td> </tr> <tr> <td>7</td> <td>prebup_intox_7</td> <td>Soapbox (talkative)</td> </tr> <tr> <td>8</td> <td>prebup_intox_8</td> <td>Rush</td> </tr> <tr> <td>9</td> <td>prebup_intox_9</td> <td>Friendly</td> </tr> <tr> <td>10</td> <td>prebup_intox_10</td> <td>Relaxed</td> </tr> <tr> <td>11</td> <td>prebup_intox_11</td> <td>Diffi culty concentrating</td> </tr> <tr> <td>12</td> <td>prebup_intox_12</td> <td>Feeling lightheaded or dizzy</td> </tr> <tr> <td>13</td> <td>prebup_intox_13</td> <td>Feeling confused</td> </tr> <tr> <td>0</td> <td>prebup_intox_0</td> <td>None of the above</td> </tr> </table> | 1 | prebup_intox_1   | Good mood                           | 2 | prebup_intox_2   | Coasting (Spaced out)                  | 3 | prebup_intox_3   | Pleasant Sick | 4 | prebup_intox_4   | Drive (energy) | 5 | prebup_intox_5   | High              | 6 | prebup_intox_6 | Drunken           | 7 | prebup_intox_7 | Soapbox (talkative) | 8 | prebup_intox_8 | Rush | 9 | prebup_intox_9 | Friendly | 10 | prebup_intox_10 | Relaxed | 11 | prebup_intox_11 | Diffi culty concentrating | 12 | prebup_intox_12 | Feeling lightheaded or dizzy | 13 | prebup_intox_13 | Feeling confused | 0 | prebup_intox_0 | None of the above |
| 1  | prebup_intox_1   | Good mood                                                                                                                                                                             |                                                                                                                                                                                                                                                                                                                                                                                                                                                                                                                                                                                                                                                                                                                                                                                                                                                                                                                                                                                                                                                                                      |   |                  |                                     |   |                  |                                        |   |                  |               |   |                  |                |   |                  |                   |   |                |                   |   |                |                     |   |                |      |   |                |          |    |                 |         |    |                 |                           |    |                 |                              |    |                 |                  |   |                |                   |
| 2  | prebup_intox_2   | Coasting (Spaced out)                                                                                                                                                                 |                                                                                                                                                                                                                                                                                                                                                                                                                                                                                                                                                                                                                                                                                                                                                                                                                                                                                                                                                                                                                                                                                      |   |                  |                                     |   |                  |                                        |   |                  |               |   |                  |                |   |                  |                   |   |                |                   |   |                |                     |   |                |      |   |                |          |    |                 |         |    |                 |                           |    |                 |                              |    |                 |                  |   |                |                   |
| 3  | prebup_intox_3   | Pleasant Sick                                                                                                                                                                         |                                                                                                                                                                                                                                                                                                                                                                                                                                                                                                                                                                                                                                                                                                                                                                                                                                                                                                                                                                                                                                                                                      |   |                  |                                     |   |                  |                                        |   |                  |               |   |                  |                |   |                  |                   |   |                |                   |   |                |                     |   |                |      |   |                |          |    |                 |         |    |                 |                           |    |                 |                              |    |                 |                  |   |                |                   |
| 4  | prebup_intox_4   | Drive (energy)                                                                                                                                                                        |                                                                                                                                                                                                                                                                                                                                                                                                                                                                                                                                                                                                                                                                                                                                                                                                                                                                                                                                                                                                                                                                                      |   |                  |                                     |   |                  |                                        |   |                  |               |   |                  |                |   |                  |                   |   |                |                   |   |                |                     |   |                |      |   |                |          |    |                 |         |    |                 |                           |    |                 |                              |    |                 |                  |   |                |                   |
| 5  | prebup_intox_5   | High                                                                                                                                                                                  |                                                                                                                                                                                                                                                                                                                                                                                                                                                                                                                                                                                                                                                                                                                                                                                                                                                                                                                                                                                                                                                                                      |   |                  |                                     |   |                  |                                        |   |                  |               |   |                  |                |   |                  |                   |   |                |                   |   |                |                     |   |                |      |   |                |          |    |                 |         |    |                 |                           |    |                 |                              |    |                 |                  |   |                |                   |
| 6  | prebup_intox_6   | Drunken                                                                                                                                                                               |                                                                                                                                                                                                                                                                                                                                                                                                                                                                                                                                                                                                                                                                                                                                                                                                                                                                                                                                                                                                                                                                                      |   |                  |                                     |   |                  |                                        |   |                  |               |   |                  |                |   |                  |                   |   |                |                   |   |                |                     |   |                |      |   |                |          |    |                 |         |    |                 |                           |    |                 |                              |    |                 |                  |   |                |                   |
| 7  | prebup_intox_7   | Soapbox (talkative)                                                                                                                                                                   |                                                                                                                                                                                                                                                                                                                                                                                                                                                                                                                                                                                                                                                                                                                                                                                                                                                                                                                                                                                                                                                                                      |   |                  |                                     |   |                  |                                        |   |                  |               |   |                  |                |   |                  |                   |   |                |                   |   |                |                     |   |                |      |   |                |          |    |                 |         |    |                 |                           |    |                 |                              |    |                 |                  |   |                |                   |
| 8  | prebup_intox_8   | Rush                                                                                                                                                                                  |                                                                                                                                                                                                                                                                                                                                                                                                                                                                                                                                                                                                                                                                                                                                                                                                                                                                                                                                                                                                                                                                                      |   |                  |                                     |   |                  |                                        |   |                  |               |   |                  |                |   |                  |                   |   |                |                   |   |                |                     |   |                |      |   |                |          |    |                 |         |    |                 |                           |    |                 |                              |    |                 |                  |   |                |                   |
| 9  | prebup_intox_9   | Friendly                                                                                                                                                                              |                                                                                                                                                                                                                                                                                                                                                                                                                                                                                                                                                                                                                                                                                                                                                                                                                                                                                                                                                                                                                                                                                      |   |                  |                                     |   |                  |                                        |   |                  |               |   |                  |                |   |                  |                   |   |                |                   |   |                |                     |   |                |      |   |                |          |    |                 |         |    |                 |                           |    |                 |                              |    |                 |                  |   |                |                   |
| 10 | prebup_intox_10  | Relaxed                                                                                                                                                                               |                                                                                                                                                                                                                                                                                                                                                                                                                                                                                                                                                                                                                                                                                                                                                                                                                                                                                                                                                                                                                                                                                      |   |                  |                                     |   |                  |                                        |   |                  |               |   |                  |                |   |                  |                   |   |                |                   |   |                |                     |   |                |      |   |                |          |    |                 |         |    |                 |                           |    |                 |                              |    |                 |                  |   |                |                   |
| 11 | prebup_intox_11  | Diffi culty concentrating                                                                                                                                                             |                                                                                                                                                                                                                                                                                                                                                                                                                                                                                                                                                                                                                                                                                                                                                                                                                                                                                                                                                                                                                                                                                      |   |                  |                                     |   |                  |                                        |   |                  |               |   |                  |                |   |                  |                   |   |                |                   |   |                |                     |   |                |      |   |                |          |    |                 |         |    |                 |                           |    |                 |                              |    |                 |                  |   |                |                   |
| 12 | prebup_intox_12  | Feeling lightheaded or dizzy                                                                                                                                                          |                                                                                                                                                                                                                                                                                                                                                                                                                                                                                                                                                                                                                                                                                                                                                                                                                                                                                                                                                                                                                                                                                      |   |                  |                                     |   |                  |                                        |   |                  |               |   |                  |                |   |                  |                   |   |                |                   |   |                |                     |   |                |      |   |                |          |    |                 |         |    |                 |                           |    |                 |                              |    |                 |                  |   |                |                   |
| 13 | prebup_intox_13  | Feeling confused                                                                                                                                                                      |                                                                                                                                                                                                                                                                                                                                                                                                                                                                                                                                                                                                                                                                                                                                                                                                                                                                                                                                                                                                                                                                                      |   |                  |                                     |   |                  |                                        |   |                  |               |   |                  |                |   |                  |                   |   |                |                   |   |                |                     |   |                |      |   |                |          |    |                 |         |    |                 |                           |    |                 |                              |    |                 |                  |   |                |                   |
| 0  | prebup_intox_0   | None of the above                                                                                                                                                                     |                                                                                                                                                                                                                                                                                                                                                                                                                                                                                                                                                                                                                                                                                                                                                                                                                                                                                                                                                                                                                                                                                      |   |                  |                                     |   |                  |                                        |   |                  |               |   |                  |                |   |                  |                   |   |                |                   |   |                |                     |   |                |      |   |                |          |    |                 |         |    |                 |                           |    |                 |                              |    |                 |                  |   |                |                   |
| 98 | prebup_gi        | <p><b>Section Header:</b> <i>Pre-Bup GI</i></p> <p><b>Which of the following gastrointestinal signs or symptoms were documented before buprenorphine administration?</b></p>          | <p><b>checkbox, Required</b></p> <table border="1"> <tr> <td>1</td> <td>prebup_gi_1</td> <td>Constipation</td> </tr> <tr> <td>2</td> <td>prebup_gi_2</td> <td>Turning of stomach/cramping/abdom pain</td> </tr> <tr> <td>3</td> <td>prebup_gi_3</td> <td>Nausea</td> </tr> <tr> <td>4</td> <td>prebup_gi_4</td> <td>Vomiting</td> </tr> <tr> <td>5</td> <td>prebup_gi_5</td> <td>Diarrhea</td> </tr> <tr> <td>0</td> <td>prebup_gi_0</td> <td>None of the above</td> </tr> </table>                                                                                                                                                                                                                                                                                                                                                                                                                                                                                                                                                                                                  | 1 | prebup_gi_1      | Constipation                        | 2 | prebup_gi_2      | Turning of stomach/cramping/abdom pain | 3 | prebup_gi_3      | Nausea        | 4 | prebup_gi_4      | Vomiting       | 5 | prebup_gi_5      | Diarrhea          | 0 | prebup_gi_0    | None of the above |   |                |                     |   |                |      |   |                |          |    |                 |         |    |                 |                           |    |                 |                              |    |                 |                  |   |                |                   |
| 1  | prebup_gi_1      | Constipation                                                                                                                                                                          |                                                                                                                                                                                                                                                                                                                                                                                                                                                                                                                                                                                                                                                                                                                                                                                                                                                                                                                                                                                                                                                                                      |   |                  |                                     |   |                  |                                        |   |                  |               |   |                  |                |   |                  |                   |   |                |                   |   |                |                     |   |                |      |   |                |          |    |                 |         |    |                 |                           |    |                 |                              |    |                 |                  |   |                |                   |
| 2  | prebup_gi_2      | Turning of stomach/cramping/abdom pain                                                                                                                                                |                                                                                                                                                                                                                                                                                                                                                                                                                                                                                                                                                                                                                                                                                                                                                                                                                                                                                                                                                                                                                                                                                      |   |                  |                                     |   |                  |                                        |   |                  |               |   |                  |                |   |                  |                   |   |                |                   |   |                |                     |   |                |      |   |                |          |    |                 |         |    |                 |                           |    |                 |                              |    |                 |                  |   |                |                   |
| 3  | prebup_gi_3      | Nausea                                                                                                                                                                                |                                                                                                                                                                                                                                                                                                                                                                                                                                                                                                                                                                                                                                                                                                                                                                                                                                                                                                                                                                                                                                                                                      |   |                  |                                     |   |                  |                                        |   |                  |               |   |                  |                |   |                  |                   |   |                |                   |   |                |                     |   |                |      |   |                |          |    |                 |         |    |                 |                           |    |                 |                              |    |                 |                  |   |                |                   |
| 4  | prebup_gi_4      | Vomiting                                                                                                                                                                              |                                                                                                                                                                                                                                                                                                                                                                                                                                                                                                                                                                                                                                                                                                                                                                                                                                                                                                                                                                                                                                                                                      |   |                  |                                     |   |                  |                                        |   |                  |               |   |                  |                |   |                  |                   |   |                |                   |   |                |                     |   |                |      |   |                |          |    |                 |         |    |                 |                           |    |                 |                              |    |                 |                  |   |                |                   |
| 5  | prebup_gi_5      | Diarrhea                                                                                                                                                                              |                                                                                                                                                                                                                                                                                                                                                                                                                                                                                                                                                                                                                                                                                                                                                                                                                                                                                                                                                                                                                                                                                      |   |                  |                                     |   |                  |                                        |   |                  |               |   |                  |                |   |                  |                   |   |                |                   |   |                |                     |   |                |      |   |                |          |    |                 |         |    |                 |                           |    |                 |                              |    |                 |                  |   |                |                   |
| 0  | prebup_gi_0      | None of the above                                                                                                                                                                     |                                                                                                                                                                                                                                                                                                                                                                                                                                                                                                                                                                                                                                                                                                                                                                                                                                                                                                                                                                                                                                                                                      |   |                  |                                     |   |                  |                                        |   |                  |               |   |                  |                |   |                  |                   |   |                |                   |   |                |                     |   |                |      |   |                |          |    |                 |         |    |                 |                           |    |                 |                              |    |                 |                  |   |                |                   |
| 99 | prebup_anxious   | <p><b>Section Header:</b> <i>Pre-Bup Anxiety</i></p> <p><b>Which of the following signs or symptoms of anxiety were documented before buprenorphine administration?</b></p>           | <p><b>checkbox, Required</b></p> <table border="1"> <tr> <td>1</td> <td>prebup_anxious_1</td> <td>Anxiety, irritability, or agitation</td> </tr> <tr> <td>2</td> <td>prebup_anxious_2</td> <td>Nervousness</td> </tr> <tr> <td>3</td> <td>prebup_anxious_3</td> <td>Tremor</td> </tr> <tr> <td>4</td> <td>prebup_anxious_4</td> <td>Restlessness</td> </tr> <tr> <td>0</td> <td>prebup_anxious_0</td> <td>None of the above</td> </tr> </table>                                                                                                                                                                                                                                                                                                                                                                                                                                                                                                                                                                                                                                      | 1 | prebup_anxious_1 | Anxiety, irritability, or agitation | 2 | prebup_anxious_2 | Nervousness                            | 3 | prebup_anxious_3 | Tremor        | 4 | prebup_anxious_4 | Restlessness   | 0 | prebup_anxious_0 | None of the above |   |                |                   |   |                |                     |   |                |      |   |                |          |    |                 |         |    |                 |                           |    |                 |                              |    |                 |                  |   |                |                   |
| 1  | prebup_anxious_1 | Anxiety, irritability, or agitation                                                                                                                                                   |                                                                                                                                                                                                                                                                                                                                                                                                                                                                                                                                                                                                                                                                                                                                                                                                                                                                                                                                                                                                                                                                                      |   |                  |                                     |   |                  |                                        |   |                  |               |   |                  |                |   |                  |                   |   |                |                   |   |                |                     |   |                |      |   |                |          |    |                 |         |    |                 |                           |    |                 |                              |    |                 |                  |   |                |                   |
| 2  | prebup_anxious_2 | Nervousness                                                                                                                                                                           |                                                                                                                                                                                                                                                                                                                                                                                                                                                                                                                                                                                                                                                                                                                                                                                                                                                                                                                                                                                                                                                                                      |   |                  |                                     |   |                  |                                        |   |                  |               |   |                  |                |   |                  |                   |   |                |                   |   |                |                     |   |                |      |   |                |          |    |                 |         |    |                 |                           |    |                 |                              |    |                 |                  |   |                |                   |
| 3  | prebup_anxious_3 | Tremor                                                                                                                                                                                |                                                                                                                                                                                                                                                                                                                                                                                                                                                                                                                                                                                                                                                                                                                                                                                                                                                                                                                                                                                                                                                                                      |   |                  |                                     |   |                  |                                        |   |                  |               |   |                  |                |   |                  |                   |   |                |                   |   |                |                     |   |                |      |   |                |          |    |                 |         |    |                 |                           |    |                 |                              |    |                 |                  |   |                |                   |
| 4  | prebup_anxious_4 | Restlessness                                                                                                                                                                          |                                                                                                                                                                                                                                                                                                                                                                                                                                                                                                                                                                                                                                                                                                                                                                                                                                                                                                                                                                                                                                                                                      |   |                  |                                     |   |                  |                                        |   |                  |               |   |                  |                |   |                  |                   |   |                |                   |   |                |                     |   |                |      |   |                |          |    |                 |         |    |                 |                           |    |                 |                              |    |                 |                  |   |                |                   |
| 0  | prebup_anxious_0 | None of the above                                                                                                                                                                     |                                                                                                                                                                                                                                                                                                                                                                                                                                                                                                                                                                                                                                                                                                                                                                                                                                                                                                                                                                                                                                                                                      |   |                  |                                     |   |                  |                                        |   |                  |               |   |                  |                |   |                  |                   |   |                |                   |   |                |                     |   |                |      |   |                |          |    |                 |         |    |                 |                           |    |                 |                              |    |                 |                  |   |                |                   |

|     |                     |                                                                                                                                                                       |                                                                                                                                                                                                                                                                                                                                                                                                                                                                                                                                                                                                                                                                                                                                                                                                                  |   |                     |                          |         |                     |                                       |     |                     |             |   |                     |                        |   |                     |                                                    |   |                     |                                                      |   |                     |                                                      |   |                     |                   |
|-----|---------------------|-----------------------------------------------------------------------------------------------------------------------------------------------------------------------|------------------------------------------------------------------------------------------------------------------------------------------------------------------------------------------------------------------------------------------------------------------------------------------------------------------------------------------------------------------------------------------------------------------------------------------------------------------------------------------------------------------------------------------------------------------------------------------------------------------------------------------------------------------------------------------------------------------------------------------------------------------------------------------------------------------|---|---------------------|--------------------------|---------|---------------------|---------------------------------------|-----|---------------------|-------------|---|---------------------|------------------------|---|---------------------|----------------------------------------------------|---|---------------------|------------------------------------------------------|---|---------------------|------------------------------------------------------|---|---------------------|-------------------|
| 100 | prebup_vitals       | Which of the following abnormal vital signs were documented before buprenorphine administration?                                                                      | checkbox, Required<br><table border="1"> <tr> <td>1</td> <td>prebup_vitals_1</td> <td>Hypoxia</td> </tr> <tr> <td>2</td> <td>prebup_vitals_2</td> <td>Hypercarbia</td> </tr> <tr> <td>3</td> <td>prebup_vitals_3</td> <td>Hypotension</td> </tr> <tr> <td>4</td> <td>prebup_vitals_4</td> <td>Bradycardia</td> </tr> <tr> <td>0</td> <td>prebup_vitals_0</td> <td>None of the above</td> </tr> </table>                                                                                                                                                                                                                                                                                                                                                                                                          | 1 | prebup_vitals_1     | Hypoxia                  | 2       | prebup_vitals_2     | Hypercarbia                           | 3   | prebup_vitals_3     | Hypotension | 4 | prebup_vitals_4     | Bradycardia            | 0 | prebup_vitals_0     | None of the above                                  |   |                     |                                                      |   |                     |                                                      |   |                     |                   |
| 1   | prebup_vitals_1     | Hypoxia                                                                                                                                                               |                                                                                                                                                                                                                                                                                                                                                                                                                                                                                                                                                                                                                                                                                                                                                                                                                  |   |                     |                          |         |                     |                                       |     |                     |             |   |                     |                        |   |                     |                                                    |   |                     |                                                      |   |                     |                                                      |   |                     |                   |
| 2   | prebup_vitals_2     | Hypercarbia                                                                                                                                                           |                                                                                                                                                                                                                                                                                                                                                                                                                                                                                                                                                                                                                                                                                                                                                                                                                  |   |                     |                          |         |                     |                                       |     |                     |             |   |                     |                        |   |                     |                                                    |   |                     |                                                      |   |                     |                                                      |   |                     |                   |
| 3   | prebup_vitals_3     | Hypotension                                                                                                                                                           |                                                                                                                                                                                                                                                                                                                                                                                                                                                                                                                                                                                                                                                                                                                                                                                                                  |   |                     |                          |         |                     |                                       |     |                     |             |   |                     |                        |   |                     |                                                    |   |                     |                                                      |   |                     |                                                      |   |                     |                   |
| 4   | prebup_vitals_4     | Bradycardia                                                                                                                                                           |                                                                                                                                                                                                                                                                                                                                                                                                                                                                                                                                                                                                                                                                                                                                                                                                                  |   |                     |                          |         |                     |                                       |     |                     |             |   |                     |                        |   |                     |                                                    |   |                     |                                                      |   |                     |                                                      |   |                     |                   |
| 0   | prebup_vitals_0     | None of the above                                                                                                                                                     |                                                                                                                                                                                                                                                                                                                                                                                                                                                                                                                                                                                                                                                                                                                                                                                                                  |   |                     |                          |         |                     |                                       |     |                     |             |   |                     |                        |   |                     |                                                    |   |                     |                                                      |   |                     |                                                      |   |                     |                   |
| 101 | prebup_withdrawal   | Section Header: <i>Pre-Bup Withdrawal</i><br>Which of the following signs or symptoms of withdrawal were documented before buprenorphine administration?              | checkbox, Required<br><table border="1"> <tr> <td>1</td> <td>prebup_withdrawal 1</td> <td>Yawning</td> </tr> <tr> <td>2</td> <td>prebup_withdrawal 2</td> <td>Gooseflesh skin (chills/piloerection)</td> </tr> <tr> <td>3</td> <td>prebup_withdrawal 3</td> <td>Pulse &gt; 80</td> </tr> <tr> <td>4</td> <td>prebup_withdrawal 4</td> <td>Sweating (diaphoresis)</td> </tr> <tr> <td>5</td> <td>prebup_withdrawal 5</td> <td>Pupil size larger than normal (dilation/mydriasis)</td> </tr> <tr> <td>6</td> <td>prebup_withdrawal 6</td> <td>Bone, joint aches, body aches (arthralgias/myalgias)</td> </tr> <tr> <td>7</td> <td>prebup_withdrawal 7</td> <td>Runny nose or tearing (rhinorrhea or lacrimation)</td> </tr> <tr> <td>0</td> <td>prebup_withdrawal 0</td> <td>None of the above</td> </tr> </table> | 1 | prebup_withdrawal 1 | Yawning                  | 2       | prebup_withdrawal 2 | Gooseflesh skin (chills/piloerection) | 3   | prebup_withdrawal 3 | Pulse > 80  | 4 | prebup_withdrawal 4 | Sweating (diaphoresis) | 5 | prebup_withdrawal 5 | Pupil size larger than normal (dilation/mydriasis) | 6 | prebup_withdrawal 6 | Bone, joint aches, body aches (arthralgias/myalgias) | 7 | prebup_withdrawal 7 | Runny nose or tearing (rhinorrhea or lacrimation)    | 0 | prebup_withdrawal 0 | None of the above |
| 1   | prebup_withdrawal 1 | Yawning                                                                                                                                                               |                                                                                                                                                                                                                                                                                                                                                                                                                                                                                                                                                                                                                                                                                                                                                                                                                  |   |                     |                          |         |                     |                                       |     |                     |             |   |                     |                        |   |                     |                                                    |   |                     |                                                      |   |                     |                                                      |   |                     |                   |
| 2   | prebup_withdrawal 2 | Gooseflesh skin (chills/piloerection)                                                                                                                                 |                                                                                                                                                                                                                                                                                                                                                                                                                                                                                                                                                                                                                                                                                                                                                                                                                  |   |                     |                          |         |                     |                                       |     |                     |             |   |                     |                        |   |                     |                                                    |   |                     |                                                      |   |                     |                                                      |   |                     |                   |
| 3   | prebup_withdrawal 3 | Pulse > 80                                                                                                                                                            |                                                                                                                                                                                                                                                                                                                                                                                                                                                                                                                                                                                                                                                                                                                                                                                                                  |   |                     |                          |         |                     |                                       |     |                     |             |   |                     |                        |   |                     |                                                    |   |                     |                                                      |   |                     |                                                      |   |                     |                   |
| 4   | prebup_withdrawal 4 | Sweating (diaphoresis)                                                                                                                                                |                                                                                                                                                                                                                                                                                                                                                                                                                                                                                                                                                                                                                                                                                                                                                                                                                  |   |                     |                          |         |                     |                                       |     |                     |             |   |                     |                        |   |                     |                                                    |   |                     |                                                      |   |                     |                                                      |   |                     |                   |
| 5   | prebup_withdrawal 5 | Pupil size larger than normal (dilation/mydriasis)                                                                                                                    |                                                                                                                                                                                                                                                                                                                                                                                                                                                                                                                                                                                                                                                                                                                                                                                                                  |   |                     |                          |         |                     |                                       |     |                     |             |   |                     |                        |   |                     |                                                    |   |                     |                                                      |   |                     |                                                      |   |                     |                   |
| 6   | prebup_withdrawal 6 | Bone, joint aches, body aches (arthralgias/myalgias)                                                                                                                  |                                                                                                                                                                                                                                                                                                                                                                                                                                                                                                                                                                                                                                                                                                                                                                                                                  |   |                     |                          |         |                     |                                       |     |                     |             |   |                     |                        |   |                     |                                                    |   |                     |                                                      |   |                     |                                                      |   |                     |                   |
| 7   | prebup_withdrawal 7 | Runny nose or tearing (rhinorrhea or lacrimation)                                                                                                                     |                                                                                                                                                                                                                                                                                                                                                                                                                                                                                                                                                                                                                                                                                                                                                                                                                  |   |                     |                          |         |                     |                                       |     |                     |             |   |                     |                        |   |                     |                                                    |   |                     |                                                      |   |                     |                                                      |   |                     |                   |
| 0   | prebup_withdrawal 0 | None of the above                                                                                                                                                     |                                                                                                                                                                                                                                                                                                                                                                                                                                                                                                                                                                                                                                                                                                                                                                                                                  |   |                     |                          |         |                     |                                       |     |                     |             |   |                     |                        |   |                     |                                                    |   |                     |                                                      |   |                     |                                                      |   |                     |                   |
| 102 | prebup_misc_sx      | Section Header: <i>Pre-Bup Miscellaneous</i><br>Which of the following miscellaneous opioid related side effects were documented before buprenorphine administration? | checkbox, Required<br><table border="1"> <tr> <td>1</td> <td>prebup_misc_sx 1</td> <td>Difficulty passing urine</td> </tr> <tr> <td>2</td> <td>prebup_misc_sx 2</td> <td>Itchiness</td> </tr> <tr> <td>3</td> <td>prebup_misc_sx 3</td> <td>Drymouth</td> </tr> <tr> <td>4</td> <td>prebup_misc_sx 4</td> <td>Headache</td> </tr> <tr> <td>5</td> <td>prebup_misc_sx 5</td> <td>Unable to walk</td> </tr> <tr> <td>6</td> <td>prebup_misc_sx 6</td> <td>Unable to discharge</td> </tr> <tr> <td>7</td> <td>prebup_misc_sx 7</td> <td>Pupil size smaller than normal (constriction/miosis)</td> </tr> <tr> <td>0</td> <td>prebup_misc_sx 0</td> <td>None of the above</td> </tr> </table>                                                                                                                         | 1 | prebup_misc_sx 1    | Difficulty passing urine | 2       | prebup_misc_sx 2    | Itchiness                             | 3   | prebup_misc_sx 3    | Drymouth    | 4 | prebup_misc_sx 4    | Headache               | 5 | prebup_misc_sx 5    | Unable to walk                                     | 6 | prebup_misc_sx 6    | Unable to discharge                                  | 7 | prebup_misc_sx 7    | Pupil size smaller than normal (constriction/miosis) | 0 | prebup_misc_sx 0    | None of the above |
| 1   | prebup_misc_sx 1    | Difficulty passing urine                                                                                                                                              |                                                                                                                                                                                                                                                                                                                                                                                                                                                                                                                                                                                                                                                                                                                                                                                                                  |   |                     |                          |         |                     |                                       |     |                     |             |   |                     |                        |   |                     |                                                    |   |                     |                                                      |   |                     |                                                      |   |                     |                   |
| 2   | prebup_misc_sx 2    | Itchiness                                                                                                                                                             |                                                                                                                                                                                                                                                                                                                                                                                                                                                                                                                                                                                                                                                                                                                                                                                                                  |   |                     |                          |         |                     |                                       |     |                     |             |   |                     |                        |   |                     |                                                    |   |                     |                                                      |   |                     |                                                      |   |                     |                   |
| 3   | prebup_misc_sx 3    | Drymouth                                                                                                                                                              |                                                                                                                                                                                                                                                                                                                                                                                                                                                                                                                                                                                                                                                                                                                                                                                                                  |   |                     |                          |         |                     |                                       |     |                     |             |   |                     |                        |   |                     |                                                    |   |                     |                                                      |   |                     |                                                      |   |                     |                   |
| 4   | prebup_misc_sx 4    | Headache                                                                                                                                                              |                                                                                                                                                                                                                                                                                                                                                                                                                                                                                                                                                                                                                                                                                                                                                                                                                  |   |                     |                          |         |                     |                                       |     |                     |             |   |                     |                        |   |                     |                                                    |   |                     |                                                      |   |                     |                                                      |   |                     |                   |
| 5   | prebup_misc_sx 5    | Unable to walk                                                                                                                                                        |                                                                                                                                                                                                                                                                                                                                                                                                                                                                                                                                                                                                                                                                                                                                                                                                                  |   |                     |                          |         |                     |                                       |     |                     |             |   |                     |                        |   |                     |                                                    |   |                     |                                                      |   |                     |                                                      |   |                     |                   |
| 6   | prebup_misc_sx 6    | Unable to discharge                                                                                                                                                   |                                                                                                                                                                                                                                                                                                                                                                                                                                                                                                                                                                                                                                                                                                                                                                                                                  |   |                     |                          |         |                     |                                       |     |                     |             |   |                     |                        |   |                     |                                                    |   |                     |                                                      |   |                     |                                                      |   |                     |                   |
| 7   | prebup_misc_sx 7    | Pupil size smaller than normal (constriction/miosis)                                                                                                                  |                                                                                                                                                                                                                                                                                                                                                                                                                                                                                                                                                                                                                                                                                                                                                                                                                  |   |                     |                          |         |                     |                                       |     |                     |             |   |                     |                        |   |                     |                                                    |   |                     |                                                      |   |                     |                                                      |   |                     |                   |
| 0   | prebup_misc_sx 0    | None of the above                                                                                                                                                     |                                                                                                                                                                                                                                                                                                                                                                                                                                                                                                                                                                                                                                                                                                                                                                                                                  |   |                     |                          |         |                     |                                       |     |                     |             |   |                     |                        |   |                     |                                                    |   |                     |                                                      |   |                     |                                                      |   |                     |                   |
| 103 | pupils              | Section Header: <i>Pre-Bup Pupils</i><br>Pupil Quality                                                                                                                | radio, Required<br><table border="1"> <tr> <td>1</td> <td>Normal</td> </tr> <tr> <td>2</td> <td>Dilated</td> </tr> <tr> <td>3</td> <td>Constricted</td> </tr> <tr> <td>999</td> <td>Not listed</td> </tr> </table>                                                                                                                                                                                                                                                                                                                                                                                                                                                                                                                                                                                               | 1 | Normal              | 2                        | Dilated | 3                   | Constricted                           | 999 | Not listed          |             |   |                     |                        |   |                     |                                                    |   |                     |                                                      |   |                     |                                                      |   |                     |                   |
| 1   | Normal              |                                                                                                                                                                       |                                                                                                                                                                                                                                                                                                                                                                                                                                                                                                                                                                                                                                                                                                                                                                                                                  |   |                     |                          |         |                     |                                       |     |                     |             |   |                     |                        |   |                     |                                                    |   |                     |                                                      |   |                     |                                                      |   |                     |                   |
| 2   | Dilated             |                                                                                                                                                                       |                                                                                                                                                                                                                                                                                                                                                                                                                                                                                                                                                                                                                                                                                                                                                                                                                  |   |                     |                          |         |                     |                                       |     |                     |             |   |                     |                        |   |                     |                                                    |   |                     |                                                      |   |                     |                                                      |   |                     |                   |
| 3   | Constricted         |                                                                                                                                                                       |                                                                                                                                                                                                                                                                                                                                                                                                                                                                                                                                                                                                                                                                                                                                                                                                                  |   |                     |                          |         |                     |                                       |     |                     |             |   |                     |                        |   |                     |                                                    |   |                     |                                                      |   |                     |                                                      |   |                     |                   |
| 999 | Not listed          |                                                                                                                                                                       |                                                                                                                                                                                                                                                                                                                                                                                                                                                                                                                                                                                                                                                                                                                                                                                                                  |   |                     |                          |         |                     |                                       |     |                     |             |   |                     |                        |   |                     |                                                    |   |                     |                                                      |   |                     |                                                      |   |                     |                   |
| 104 | prebup_pupil_mm     | Pupil measurement listed?                                                                                                                                             | yesno, Required<br><table border="1"> <tr> <td>1</td> <td>Yes</td> </tr> <tr> <td>0</td> <td>No</td> </tr> </table>                                                                                                                                                                                                                                                                                                                                                                                                                                                                                                                                                                                                                                                                                              | 1 | Yes                 | 0                        | No      |                     |                                       |     |                     |             |   |                     |                        |   |                     |                                                    |   |                     |                                                      |   |                     |                                                      |   |                     |                   |
| 1   | Yes                 |                                                                                                                                                                       |                                                                                                                                                                                                                                                                                                                                                                                                                                                                                                                                                                                                                                                                                                                                                                                                                  |   |                     |                          |         |                     |                                       |     |                     |             |   |                     |                        |   |                     |                                                    |   |                     |                                                      |   |                     |                                                      |   |                     |                   |
| 0   | No                  |                                                                                                                                                                       |                                                                                                                                                                                                                                                                                                                                                                                                                                                                                                                                                                                                                                                                                                                                                                                                                  |   |                     |                          |         |                     |                                       |     |                     |             |   |                     |                        |   |                     |                                                    |   |                     |                                                      |   |                     |                                                      |   |                     |                   |



|     |                                                                                                                                                                                           |                                                                                                                                                                      |                                      |
|-----|-------------------------------------------------------------------------------------------------------------------------------------------------------------------------------------------|----------------------------------------------------------------------------------------------------------------------------------------------------------------------|--------------------------------------|
| 105 | <p><b>prebup_pupil_size</b></p> <p>Show the field ONLY if:<br/>[prebup_pupil_mm] = '1'</p>                                                                                                | <p>Please enter the pupil size measured (in mm)</p>                                                                                                                  | <p>text, Required</p>                |
| 106 | <p><b>cows</b></p>                                                                                                                                                                        | <p><b>Section Header:</b> <i>Buprenorphine Administration in the E.D.</i><br/>****</p> <p>Was an initial COWS score documented before pt received buprenorphine?</p> | <p>radio, Required</p>               |
| 107 | <p><b>cows_before</b></p> <p>Show the field ONLY if:<br/>[cows] = '1'</p>                                                                                                                 | <p>What was the COWS score before bup?</p>                                                                                                                           | <p>text, Required</p>                |
| 108 | <p><b>bup_ed</b></p>                                                                                                                                                                      | <p>How many doses of buprenorphine did the pt receive in the ED?</p>                                                                                                 | <p>radio, Required</p>               |
| 109 | <p><b>firstbup</b></p> <p>Show the field ONLY if:<br/>[bup_ed] = '1' or [bup_ed] = '2' or [bup_ed] = '3' or [bup_ed] = '4' or [bup_ed] = '5' or [bup_ed] = '6' or [bup_ed] = '7'</p>      | <p>First bup dose</p>                                                                                                                                                | <p>radio, Required</p>               |
| 110 | <p><b>firstbup_oth</b></p> <p>Show the field ONLY if:<br/>[firstbup] = '14'</p>                                                                                                           | <p>If "Other," please specify.</p>                                                                                                                                   | <p>text, Required</p>                |
| 111 | <p><b>firstbup_time</b></p> <p>Show the field ONLY if:<br/>[bup_ed] = '1' or [bup_ed] = '2' or [bup_ed] = '3' or [bup_ed] = '4' or [bup_ed] = '5' or [bup_ed] = '6' or [bup_ed] = '7'</p> | <p>What date and time was this dose administered?</p>                                                                                                                | <p>text (datetime_mdy), Required</p> |

|          |            |
|----------|------------|
| <b>1</b> | <b>Yes</b> |
| <b>0</b> | <b>No</b>  |

|          |          |
|----------|----------|
| <b>0</b> | <b>0</b> |
| <b>1</b> | <b>1</b> |
| <b>2</b> | <b>2</b> |
| <b>3</b> | <b>3</b> |
| <b>4</b> | <b>4</b> |
| <b>5</b> | <b>5</b> |
| <b>6</b> | <b>6</b> |
| <b>7</b> | <b>7</b> |

|           |                     |
|-----------|---------------------|
| <b>1</b>  | <b>0.3 mg IV</b>    |
| <b>2</b>  | <b>2 mg SL</b>      |
| <b>3</b>  | <b>4 mg SL</b>      |
| <b>4</b>  | <b>6 mg SL</b>      |
| <b>5</b>  | <b>8 mg SL</b>      |
| <b>6</b>  | <b>10 mg SL</b>     |
| <b>7</b>  | <b>12 mg SL</b>     |
| <b>8</b>  | <b>14 mg SL</b>     |
| <b>9</b>  | <b>16 mg SL</b>     |
| <b>10</b> | <b>24 mg SL</b>     |
| <b>11</b> | <b>32 mg SL</b>     |
| <b>12</b> | <b>10 mcg patch</b> |
| <b>13</b> | <b>20 mcg patch</b> |
| <b>14</b> | <b>Other</b>        |

|     |                                                                                                                                                                                        |                                                                                                                                                                                            |                                                                                                                                                                                                                                                                                                                                                                                                                                                                                                                                                                                                                                   |   |           |   |         |   |         |     |                             |   |         |   |          |   |          |   |          |   |          |    |          |    |          |    |              |    |              |    |       |
|-----|----------------------------------------------------------------------------------------------------------------------------------------------------------------------------------------|--------------------------------------------------------------------------------------------------------------------------------------------------------------------------------------------|-----------------------------------------------------------------------------------------------------------------------------------------------------------------------------------------------------------------------------------------------------------------------------------------------------------------------------------------------------------------------------------------------------------------------------------------------------------------------------------------------------------------------------------------------------------------------------------------------------------------------------------|---|-----------|---|---------|---|---------|-----|-----------------------------|---|---------|---|----------|---|----------|---|----------|---|----------|----|----------|----|----------|----|--------------|----|--------------|----|-------|
| 112 | <b>bup_admit_1</b><br><br><b>Show the field ONLY if:</b><br>[bup_ed] = '1' or [bup_ed] = '2' or [bup_ed] = '3' or [bup_ed] = '4' or [bup_ed] = '5' or [bup_ed] = '6' or [bup_ed] = '7' | <b>Was this dose of buprenorphine ordered through Soarian Clinicals?</b>                                                                                                                   | <b>yesno, Required</b><br><table border="1" data-bbox="1047 115 1136 210"> <tr> <td>1</td> <td>Yes</td> </tr> <tr> <td>0</td> <td>No</td> </tr> </table>                                                                                                                                                                                                                                                                                                                                                                                                                                                                          | 1 | Yes       | 0 | No      |   |         |     |                             |   |         |   |          |   |          |   |          |   |          |    |          |    |          |    |              |    |              |    |       |
| 1   | Yes                                                                                                                                                                                    |                                                                                                                                                                                            |                                                                                                                                                                                                                                                                                                                                                                                                                                                                                                                                                                                                                                   |   |           |   |         |   |         |     |                             |   |         |   |          |   |          |   |          |   |          |    |          |    |          |    |              |    |              |    |       |
| 0   | No                                                                                                                                                                                     |                                                                                                                                                                                            |                                                                                                                                                                                                                                                                                                                                                                                                                                                                                                                                                                                                                                   |   |           |   |         |   |         |     |                             |   |         |   |          |   |          |   |          |   |          |    |          |    |          |    |              |    |              |    |       |
| 113 | <b>post_bup_pt</b><br><br><b>Show the field ONLY if:</b><br>[bup_ed] = '1' or [bup_ed] = '2' or [bup_ed] = '3' or [bup_ed] = '4' or [bup_ed] = '5' or [bup_ed] = '6' or [bup_ed] = '7' | <b>Does the patient feel same, better, or worse within 90 minutes after this buprenorphine administration?</b><br><br><i>Remember to look in "Vitals" for a decrease/increase in pain.</i> | <b>radio, Required</b><br><table border="1" data-bbox="1047 373 1448 562"> <tr> <td>1</td> <td>Same</td> </tr> <tr> <td>2</td> <td>Better</td> </tr> <tr> <td>3</td> <td>Worse</td> </tr> <tr> <td>999</td> <td>No documentation or unclear</td> </tr> </table>                                                                                                                                                                                                                                                                                                                                                                   | 1 | Same      | 2 | Better  | 3 | Worse   | 999 | No documentation or unclear |   |         |   |          |   |          |   |          |   |          |    |          |    |          |    |              |    |              |    |       |
| 1   | Same                                                                                                                                                                                   |                                                                                                                                                                                            |                                                                                                                                                                                                                                                                                                                                                                                                                                                                                                                                                                                                                                   |   |           |   |         |   |         |     |                             |   |         |   |          |   |          |   |          |   |          |    |          |    |          |    |              |    |              |    |       |
| 2   | Better                                                                                                                                                                                 |                                                                                                                                                                                            |                                                                                                                                                                                                                                                                                                                                                                                                                                                                                                                                                                                                                                   |   |           |   |         |   |         |     |                             |   |         |   |          |   |          |   |          |   |          |    |          |    |          |    |              |    |              |    |       |
| 3   | Worse                                                                                                                                                                                  |                                                                                                                                                                                            |                                                                                                                                                                                                                                                                                                                                                                                                                                                                                                                                                                                                                                   |   |           |   |         |   |         |     |                             |   |         |   |          |   |          |   |          |   |          |    |          |    |          |    |              |    |              |    |       |
| 999 | No documentation or unclear                                                                                                                                                            |                                                                                                                                                                                            |                                                                                                                                                                                                                                                                                                                                                                                                                                                                                                                                                                                                                                   |   |           |   |         |   |         |     |                             |   |         |   |          |   |          |   |          |   |          |    |          |    |          |    |              |    |              |    |       |
| 114 | <b>secondbup</b><br><br><b>Show the field ONLY if:</b><br>[bup_ed] = '2' or [bup_ed] = '3' or [bup_ed] = '4' or [bup_ed] = '5' or [bup_ed] = '6' or [bup_ed] = '7'                     | <b>Second bup dose</b>                                                                                                                                                                     | <b>radio, Required</b><br><table border="1" data-bbox="1047 630 1258 1302"> <tr><td>1</td><td>0.3 mg IV</td></tr> <tr><td>2</td><td>2 mg SL</td></tr> <tr><td>3</td><td>4 mg SL</td></tr> <tr><td>4</td><td>6 mg SL</td></tr> <tr><td>5</td><td>8 mg SL</td></tr> <tr><td>6</td><td>10 mg SL</td></tr> <tr><td>7</td><td>12 mg SL</td></tr> <tr><td>8</td><td>14 mg SL</td></tr> <tr><td>9</td><td>16 mg SL</td></tr> <tr><td>10</td><td>24 mg SL</td></tr> <tr><td>11</td><td>32 mg SL</td></tr> <tr><td>12</td><td>10 mcg patch</td></tr> <tr><td>13</td><td>20 mcg patch</td></tr> <tr><td>14</td><td>Other</td></tr> </table> | 1 | 0.3 mg IV | 2 | 2 mg SL | 3 | 4 mg SL | 4   | 6 mg SL                     | 5 | 8 mg SL | 6 | 10 mg SL | 7 | 12 mg SL | 8 | 14 mg SL | 9 | 16 mg SL | 10 | 24 mg SL | 11 | 32 mg SL | 12 | 10 mcg patch | 13 | 20 mcg patch | 14 | Other |
| 1   | 0.3 mg IV                                                                                                                                                                              |                                                                                                                                                                                            |                                                                                                                                                                                                                                                                                                                                                                                                                                                                                                                                                                                                                                   |   |           |   |         |   |         |     |                             |   |         |   |          |   |          |   |          |   |          |    |          |    |          |    |              |    |              |    |       |
| 2   | 2 mg SL                                                                                                                                                                                |                                                                                                                                                                                            |                                                                                                                                                                                                                                                                                                                                                                                                                                                                                                                                                                                                                                   |   |           |   |         |   |         |     |                             |   |         |   |          |   |          |   |          |   |          |    |          |    |          |    |              |    |              |    |       |
| 3   | 4 mg SL                                                                                                                                                                                |                                                                                                                                                                                            |                                                                                                                                                                                                                                                                                                                                                                                                                                                                                                                                                                                                                                   |   |           |   |         |   |         |     |                             |   |         |   |          |   |          |   |          |   |          |    |          |    |          |    |              |    |              |    |       |
| 4   | 6 mg SL                                                                                                                                                                                |                                                                                                                                                                                            |                                                                                                                                                                                                                                                                                                                                                                                                                                                                                                                                                                                                                                   |   |           |   |         |   |         |     |                             |   |         |   |          |   |          |   |          |   |          |    |          |    |          |    |              |    |              |    |       |
| 5   | 8 mg SL                                                                                                                                                                                |                                                                                                                                                                                            |                                                                                                                                                                                                                                                                                                                                                                                                                                                                                                                                                                                                                                   |   |           |   |         |   |         |     |                             |   |         |   |          |   |          |   |          |   |          |    |          |    |          |    |              |    |              |    |       |
| 6   | 10 mg SL                                                                                                                                                                               |                                                                                                                                                                                            |                                                                                                                                                                                                                                                                                                                                                                                                                                                                                                                                                                                                                                   |   |           |   |         |   |         |     |                             |   |         |   |          |   |          |   |          |   |          |    |          |    |          |    |              |    |              |    |       |
| 7   | 12 mg SL                                                                                                                                                                               |                                                                                                                                                                                            |                                                                                                                                                                                                                                                                                                                                                                                                                                                                                                                                                                                                                                   |   |           |   |         |   |         |     |                             |   |         |   |          |   |          |   |          |   |          |    |          |    |          |    |              |    |              |    |       |
| 8   | 14 mg SL                                                                                                                                                                               |                                                                                                                                                                                            |                                                                                                                                                                                                                                                                                                                                                                                                                                                                                                                                                                                                                                   |   |           |   |         |   |         |     |                             |   |         |   |          |   |          |   |          |   |          |    |          |    |          |    |              |    |              |    |       |
| 9   | 16 mg SL                                                                                                                                                                               |                                                                                                                                                                                            |                                                                                                                                                                                                                                                                                                                                                                                                                                                                                                                                                                                                                                   |   |           |   |         |   |         |     |                             |   |         |   |          |   |          |   |          |   |          |    |          |    |          |    |              |    |              |    |       |
| 10  | 24 mg SL                                                                                                                                                                               |                                                                                                                                                                                            |                                                                                                                                                                                                                                                                                                                                                                                                                                                                                                                                                                                                                                   |   |           |   |         |   |         |     |                             |   |         |   |          |   |          |   |          |   |          |    |          |    |          |    |              |    |              |    |       |
| 11  | 32 mg SL                                                                                                                                                                               |                                                                                                                                                                                            |                                                                                                                                                                                                                                                                                                                                                                                                                                                                                                                                                                                                                                   |   |           |   |         |   |         |     |                             |   |         |   |          |   |          |   |          |   |          |    |          |    |          |    |              |    |              |    |       |
| 12  | 10 mcg patch                                                                                                                                                                           |                                                                                                                                                                                            |                                                                                                                                                                                                                                                                                                                                                                                                                                                                                                                                                                                                                                   |   |           |   |         |   |         |     |                             |   |         |   |          |   |          |   |          |   |          |    |          |    |          |    |              |    |              |    |       |
| 13  | 20 mcg patch                                                                                                                                                                           |                                                                                                                                                                                            |                                                                                                                                                                                                                                                                                                                                                                                                                                                                                                                                                                                                                                   |   |           |   |         |   |         |     |                             |   |         |   |          |   |          |   |          |   |          |    |          |    |          |    |              |    |              |    |       |
| 14  | Other                                                                                                                                                                                  |                                                                                                                                                                                            |                                                                                                                                                                                                                                                                                                                                                                                                                                                                                                                                                                                                                                   |   |           |   |         |   |         |     |                             |   |         |   |          |   |          |   |          |   |          |    |          |    |          |    |              |    |              |    |       |
| 115 | <b>secondbup_oth</b><br><br><b>Show the field ONLY if:</b><br>[secondbup] = '14'                                                                                                       | <b>If "Other," please specify.</b>                                                                                                                                                         | <b>text, Required</b>                                                                                                                                                                                                                                                                                                                                                                                                                                                                                                                                                                                                             |   |           |   |         |   |         |     |                             |   |         |   |          |   |          |   |          |   |          |    |          |    |          |    |              |    |              |    |       |
| 116 | <b>secondbup_time</b><br><br><b>Show the field ONLY if:</b><br>[bup_ed] = '2' or [bup_ed] = '3' or [bup_ed] = '4' or [bup_ed] = '5' or [bup_ed] = '6' or [bup_ed] = '7'                | <b>What date and time was this dose administered?</b>                                                                                                                                      | <b>text (datetime_mdy), Required</b>                                                                                                                                                                                                                                                                                                                                                                                                                                                                                                                                                                                              |   |           |   |         |   |         |     |                             |   |         |   |          |   |          |   |          |   |          |    |          |    |          |    |              |    |              |    |       |
| 117 | <b>bup_admit_2</b><br><br><b>Show the field ONLY if:</b><br>[bup_ed] = '2' or [bup_ed] = '3' or [bup_ed] = '4' or [bup_ed] = '5' or [bup_ed] = '6' or [bup_ed] = '7'                   | <b>Was this dose of buprenorphine ordered through Soarian Clinicals?</b>                                                                                                                   | <b>yesno, Required</b><br><table border="1" data-bbox="1047 1743 1136 1837"> <tr> <td>1</td> <td>Yes</td> </tr> <tr> <td>0</td> <td>No</td> </tr> </table>                                                                                                                                                                                                                                                                                                                                                                                                                                                                        | 1 | Yes       | 0 | No      |   |         |     |                             |   |         |   |          |   |          |   |          |   |          |    |          |    |          |    |              |    |              |    |       |
| 1   | Yes                                                                                                                                                                                    |                                                                                                                                                                                            |                                                                                                                                                                                                                                                                                                                                                                                                                                                                                                                                                                                                                                   |   |           |   |         |   |         |     |                             |   |         |   |          |   |          |   |          |   |          |    |          |    |          |    |              |    |              |    |       |
| 0   | No                                                                                                                                                                                     |                                                                                                                                                                                            |                                                                                                                                                                                                                                                                                                                                                                                                                                                                                                                                                                                                                                   |   |           |   |         |   |         |     |                             |   |         |   |          |   |          |   |          |   |          |    |          |    |          |    |              |    |              |    |       |

|     |                                                                                                                                                                               |                                                                                                                                                                                            |                                                                                                                                                                                                                                                                                                                                                                                                                                                                                                                                                                                                                                 |   |           |   |         |   |         |     |                             |   |         |   |          |   |          |   |          |   |          |    |          |    |          |    |             |    |             |    |       |
|-----|-------------------------------------------------------------------------------------------------------------------------------------------------------------------------------|--------------------------------------------------------------------------------------------------------------------------------------------------------------------------------------------|---------------------------------------------------------------------------------------------------------------------------------------------------------------------------------------------------------------------------------------------------------------------------------------------------------------------------------------------------------------------------------------------------------------------------------------------------------------------------------------------------------------------------------------------------------------------------------------------------------------------------------|---|-----------|---|---------|---|---------|-----|-----------------------------|---|---------|---|----------|---|----------|---|----------|---|----------|----|----------|----|----------|----|-------------|----|-------------|----|-------|
| 118 | <b>post_bup_pt_2</b><br><br><b>Show the field ONLY if:</b><br><b>[bup_ed] = '2' or [bup_ed] = '3' or [bup_ed] = '4' or [bup_ed] = '5' or [bup_ed] = '6' or [bup_ed] = '7'</b> | <b>Does the patient feel same, better, or worse within 90 minutes after this buprenorphine administration?</b><br><br><i>Remember to look in "Vitals" for a decrease/increase in pain.</i> | <b>radio, Required</b><br><table border="1" data-bbox="1047 115 1453 304"> <tr><td>1</td><td>Same</td></tr> <tr><td>2</td><td>Better</td></tr> <tr><td>3</td><td>Worse</td></tr> <tr><td>999</td><td>No documentation or unclear</td></tr> </table>                                                                                                                                                                                                                                                                                                                                                                             | 1 | Same      | 2 | Better  | 3 | Worse   | 999 | No documentation or unclear |   |         |   |          |   |          |   |          |   |          |    |          |    |          |    |             |    |             |    |       |
| 1   | Same                                                                                                                                                                          |                                                                                                                                                                                            |                                                                                                                                                                                                                                                                                                                                                                                                                                                                                                                                                                                                                                 |   |           |   |         |   |         |     |                             |   |         |   |          |   |          |   |          |   |          |    |          |    |          |    |             |    |             |    |       |
| 2   | Better                                                                                                                                                                        |                                                                                                                                                                                            |                                                                                                                                                                                                                                                                                                                                                                                                                                                                                                                                                                                                                                 |   |           |   |         |   |         |     |                             |   |         |   |          |   |          |   |          |   |          |    |          |    |          |    |             |    |             |    |       |
| 3   | Worse                                                                                                                                                                         |                                                                                                                                                                                            |                                                                                                                                                                                                                                                                                                                                                                                                                                                                                                                                                                                                                                 |   |           |   |         |   |         |     |                             |   |         |   |          |   |          |   |          |   |          |    |          |    |          |    |             |    |             |    |       |
| 999 | No documentation or unclear                                                                                                                                                   |                                                                                                                                                                                            |                                                                                                                                                                                                                                                                                                                                                                                                                                                                                                                                                                                                                                 |   |           |   |         |   |         |     |                             |   |         |   |          |   |          |   |          |   |          |    |          |    |          |    |             |    |             |    |       |
| 119 | <b>thirdbup</b><br><br><b>Show the field ONLY if:</b><br><b>[bup_ed] = '3' or [bup_ed] = '4' or [bup_ed] = '5' or [bup_ed] = '6' or [bup_ed] = '7'</b>                        | <b>Third bup dose</b>                                                                                                                                                                      | <b>radio, Required</b><br><table border="1" data-bbox="1047 367 1258 1039"> <tr><td>1</td><td>0.3 mg IV</td></tr> <tr><td>2</td><td>2 mg SL</td></tr> <tr><td>3</td><td>4 mg SL</td></tr> <tr><td>4</td><td>6 mg SL</td></tr> <tr><td>5</td><td>8 mg SL</td></tr> <tr><td>6</td><td>10 mg SL</td></tr> <tr><td>7</td><td>12 mg SL</td></tr> <tr><td>8</td><td>14 mg SL</td></tr> <tr><td>9</td><td>16 mg SL</td></tr> <tr><td>10</td><td>24 mg SL</td></tr> <tr><td>11</td><td>32 mg SL</td></tr> <tr><td>12</td><td>10mcg patch</td></tr> <tr><td>13</td><td>20mcg patch</td></tr> <tr><td>14</td><td>Other</td></tr> </table> | 1 | 0.3 mg IV | 2 | 2 mg SL | 3 | 4 mg SL | 4   | 6 mg SL                     | 5 | 8 mg SL | 6 | 10 mg SL | 7 | 12 mg SL | 8 | 14 mg SL | 9 | 16 mg SL | 10 | 24 mg SL | 11 | 32 mg SL | 12 | 10mcg patch | 13 | 20mcg patch | 14 | Other |
| 1   | 0.3 mg IV                                                                                                                                                                     |                                                                                                                                                                                            |                                                                                                                                                                                                                                                                                                                                                                                                                                                                                                                                                                                                                                 |   |           |   |         |   |         |     |                             |   |         |   |          |   |          |   |          |   |          |    |          |    |          |    |             |    |             |    |       |
| 2   | 2 mg SL                                                                                                                                                                       |                                                                                                                                                                                            |                                                                                                                                                                                                                                                                                                                                                                                                                                                                                                                                                                                                                                 |   |           |   |         |   |         |     |                             |   |         |   |          |   |          |   |          |   |          |    |          |    |          |    |             |    |             |    |       |
| 3   | 4 mg SL                                                                                                                                                                       |                                                                                                                                                                                            |                                                                                                                                                                                                                                                                                                                                                                                                                                                                                                                                                                                                                                 |   |           |   |         |   |         |     |                             |   |         |   |          |   |          |   |          |   |          |    |          |    |          |    |             |    |             |    |       |
| 4   | 6 mg SL                                                                                                                                                                       |                                                                                                                                                                                            |                                                                                                                                                                                                                                                                                                                                                                                                                                                                                                                                                                                                                                 |   |           |   |         |   |         |     |                             |   |         |   |          |   |          |   |          |   |          |    |          |    |          |    |             |    |             |    |       |
| 5   | 8 mg SL                                                                                                                                                                       |                                                                                                                                                                                            |                                                                                                                                                                                                                                                                                                                                                                                                                                                                                                                                                                                                                                 |   |           |   |         |   |         |     |                             |   |         |   |          |   |          |   |          |   |          |    |          |    |          |    |             |    |             |    |       |
| 6   | 10 mg SL                                                                                                                                                                      |                                                                                                                                                                                            |                                                                                                                                                                                                                                                                                                                                                                                                                                                                                                                                                                                                                                 |   |           |   |         |   |         |     |                             |   |         |   |          |   |          |   |          |   |          |    |          |    |          |    |             |    |             |    |       |
| 7   | 12 mg SL                                                                                                                                                                      |                                                                                                                                                                                            |                                                                                                                                                                                                                                                                                                                                                                                                                                                                                                                                                                                                                                 |   |           |   |         |   |         |     |                             |   |         |   |          |   |          |   |          |   |          |    |          |    |          |    |             |    |             |    |       |
| 8   | 14 mg SL                                                                                                                                                                      |                                                                                                                                                                                            |                                                                                                                                                                                                                                                                                                                                                                                                                                                                                                                                                                                                                                 |   |           |   |         |   |         |     |                             |   |         |   |          |   |          |   |          |   |          |    |          |    |          |    |             |    |             |    |       |
| 9   | 16 mg SL                                                                                                                                                                      |                                                                                                                                                                                            |                                                                                                                                                                                                                                                                                                                                                                                                                                                                                                                                                                                                                                 |   |           |   |         |   |         |     |                             |   |         |   |          |   |          |   |          |   |          |    |          |    |          |    |             |    |             |    |       |
| 10  | 24 mg SL                                                                                                                                                                      |                                                                                                                                                                                            |                                                                                                                                                                                                                                                                                                                                                                                                                                                                                                                                                                                                                                 |   |           |   |         |   |         |     |                             |   |         |   |          |   |          |   |          |   |          |    |          |    |          |    |             |    |             |    |       |
| 11  | 32 mg SL                                                                                                                                                                      |                                                                                                                                                                                            |                                                                                                                                                                                                                                                                                                                                                                                                                                                                                                                                                                                                                                 |   |           |   |         |   |         |     |                             |   |         |   |          |   |          |   |          |   |          |    |          |    |          |    |             |    |             |    |       |
| 12  | 10mcg patch                                                                                                                                                                   |                                                                                                                                                                                            |                                                                                                                                                                                                                                                                                                                                                                                                                                                                                                                                                                                                                                 |   |           |   |         |   |         |     |                             |   |         |   |          |   |          |   |          |   |          |    |          |    |          |    |             |    |             |    |       |
| 13  | 20mcg patch                                                                                                                                                                   |                                                                                                                                                                                            |                                                                                                                                                                                                                                                                                                                                                                                                                                                                                                                                                                                                                                 |   |           |   |         |   |         |     |                             |   |         |   |          |   |          |   |          |   |          |    |          |    |          |    |             |    |             |    |       |
| 14  | Other                                                                                                                                                                         |                                                                                                                                                                                            |                                                                                                                                                                                                                                                                                                                                                                                                                                                                                                                                                                                                                                 |   |           |   |         |   |         |     |                             |   |         |   |          |   |          |   |          |   |          |    |          |    |          |    |             |    |             |    |       |
| 120 | <b>thirdbup_oth</b><br><br><b>Show the field ONLY if:</b><br><b>[thirdbup] = '14'</b>                                                                                         | <b>If "Other," please specify.</b>                                                                                                                                                         | <b>text, Required</b>                                                                                                                                                                                                                                                                                                                                                                                                                                                                                                                                                                                                           |   |           |   |         |   |         |     |                             |   |         |   |          |   |          |   |          |   |          |    |          |    |          |    |             |    |             |    |       |
| 121 | <b>thirdbup_time</b><br><br><b>Show the field ONLY if:</b><br><b>[bup_ed] = '3' or [bup_ed] = '4' or [bup_ed] = '5' or [bup_ed] = '6' or [bup_ed] = '7'</b>                   | <b>What date and time was this dose administered?</b>                                                                                                                                      | <b>text (datetime_mdy), Required</b>                                                                                                                                                                                                                                                                                                                                                                                                                                                                                                                                                                                            |   |           |   |         |   |         |     |                             |   |         |   |          |   |          |   |          |   |          |    |          |    |          |    |             |    |             |    |       |
| 122 | <b>bup_admit_3</b><br><br><b>Show the field ONLY if:</b><br><b>[bup_ed] = '3' or [bup_ed] = '4' or [bup_ed] = '5' or [bup_ed] = '6' or [bup_ed] = '7'</b>                     | <b>Was this dose of buprenorphine ordered through Soarian Clinicals?</b>                                                                                                                   | <b>yesno, Required</b><br><table border="1" data-bbox="1047 1449 1136 1543"> <tr><td>1</td><td>Yes</td></tr> <tr><td>0</td><td>No</td></tr> </table>                                                                                                                                                                                                                                                                                                                                                                                                                                                                            | 1 | Yes       | 0 | No      |   |         |     |                             |   |         |   |          |   |          |   |          |   |          |    |          |    |          |    |             |    |             |    |       |
| 1   | Yes                                                                                                                                                                           |                                                                                                                                                                                            |                                                                                                                                                                                                                                                                                                                                                                                                                                                                                                                                                                                                                                 |   |           |   |         |   |         |     |                             |   |         |   |          |   |          |   |          |   |          |    |          |    |          |    |             |    |             |    |       |
| 0   | No                                                                                                                                                                            |                                                                                                                                                                                            |                                                                                                                                                                                                                                                                                                                                                                                                                                                                                                                                                                                                                                 |   |           |   |         |   |         |     |                             |   |         |   |          |   |          |   |          |   |          |    |          |    |          |    |             |    |             |    |       |
| 123 | <b>post_bup_pt_3</b><br><br><b>Show the field ONLY if:</b><br><b>[bup_ed] = '3' or [bup_ed] = '4' or [bup_ed] = '5' or [bup_ed] = '6' or [bup_ed] = '7'</b>                   | <b>Does the patient feel same, better, or worse within 90 minutes after this buprenorphine administration?</b><br><br><i>Remember to look in "Vitals" for a decrease/increase in pain.</i> | <b>radio, Required</b><br><table border="1" data-bbox="1047 1669 1453 1858"> <tr><td>1</td><td>Same</td></tr> <tr><td>2</td><td>Better</td></tr> <tr><td>3</td><td>Worse</td></tr> <tr><td>999</td><td>No documentation or unclear</td></tr> </table>                                                                                                                                                                                                                                                                                                                                                                           | 1 | Same      | 2 | Better  | 3 | Worse   | 999 | No documentation or unclear |   |         |   |          |   |          |   |          |   |          |    |          |    |          |    |             |    |             |    |       |
| 1   | Same                                                                                                                                                                          |                                                                                                                                                                                            |                                                                                                                                                                                                                                                                                                                                                                                                                                                                                                                                                                                                                                 |   |           |   |         |   |         |     |                             |   |         |   |          |   |          |   |          |   |          |    |          |    |          |    |             |    |             |    |       |
| 2   | Better                                                                                                                                                                        |                                                                                                                                                                                            |                                                                                                                                                                                                                                                                                                                                                                                                                                                                                                                                                                                                                                 |   |           |   |         |   |         |     |                             |   |         |   |          |   |          |   |          |   |          |    |          |    |          |    |             |    |             |    |       |
| 3   | Worse                                                                                                                                                                         |                                                                                                                                                                                            |                                                                                                                                                                                                                                                                                                                                                                                                                                                                                                                                                                                                                                 |   |           |   |         |   |         |     |                             |   |         |   |          |   |          |   |          |   |          |    |          |    |          |    |             |    |             |    |       |
| 999 | No documentation or unclear                                                                                                                                                   |                                                                                                                                                                                            |                                                                                                                                                                                                                                                                                                                                                                                                                                                                                                                                                                                                                                 |   |           |   |         |   |         |     |                             |   |         |   |          |   |          |   |          |   |          |    |          |    |          |    |             |    |             |    |       |

|     |                                                                                                                                            |                                                                                                                                                                                            |                                                                                                                                                                                                                                                                                                                                                                                                                                                                                                                                                                                                                              |   |           |   |         |   |         |     |                             |   |         |   |          |   |          |   |          |   |          |    |          |    |          |    |            |    |            |    |       |
|-----|--------------------------------------------------------------------------------------------------------------------------------------------|--------------------------------------------------------------------------------------------------------------------------------------------------------------------------------------------|------------------------------------------------------------------------------------------------------------------------------------------------------------------------------------------------------------------------------------------------------------------------------------------------------------------------------------------------------------------------------------------------------------------------------------------------------------------------------------------------------------------------------------------------------------------------------------------------------------------------------|---|-----------|---|---------|---|---------|-----|-----------------------------|---|---------|---|----------|---|----------|---|----------|---|----------|----|----------|----|----------|----|------------|----|------------|----|-------|
| 124 | <b>fourthbup</b><br><br><b>Show the field ONLY if:</b><br><b>[bup_ed] = '4' or [bup_ed] = '5' or [bup_ed] = '6' or [bup_ed] = '7'</b>      | <b>Fourth bup dose</b>                                                                                                                                                                     | <b>radio, Required</b><br><table border="1" data-bbox="1045 115 1260 783"> <tr><td>1</td><td>0.3 mg IV</td></tr> <tr><td>2</td><td>2 mg SL</td></tr> <tr><td>3</td><td>4 mg SL</td></tr> <tr><td>4</td><td>6 mg SL</td></tr> <tr><td>5</td><td>8 mg SL</td></tr> <tr><td>6</td><td>10 mg SL</td></tr> <tr><td>7</td><td>12 mg SL</td></tr> <tr><td>8</td><td>14 mg SL</td></tr> <tr><td>9</td><td>16 mg SL</td></tr> <tr><td>10</td><td>24 mg SL</td></tr> <tr><td>11</td><td>32 mg SL</td></tr> <tr><td>12</td><td>10mcgpatch</td></tr> <tr><td>13</td><td>20mcgpatch</td></tr> <tr><td>14</td><td>Other</td></tr> </table> | 1 | 0.3 mg IV | 2 | 2 mg SL | 3 | 4 mg SL | 4   | 6 mg SL                     | 5 | 8 mg SL | 6 | 10 mg SL | 7 | 12 mg SL | 8 | 14 mg SL | 9 | 16 mg SL | 10 | 24 mg SL | 11 | 32 mg SL | 12 | 10mcgpatch | 13 | 20mcgpatch | 14 | Other |
| 1   | 0.3 mg IV                                                                                                                                  |                                                                                                                                                                                            |                                                                                                                                                                                                                                                                                                                                                                                                                                                                                                                                                                                                                              |   |           |   |         |   |         |     |                             |   |         |   |          |   |          |   |          |   |          |    |          |    |          |    |            |    |            |    |       |
| 2   | 2 mg SL                                                                                                                                    |                                                                                                                                                                                            |                                                                                                                                                                                                                                                                                                                                                                                                                                                                                                                                                                                                                              |   |           |   |         |   |         |     |                             |   |         |   |          |   |          |   |          |   |          |    |          |    |          |    |            |    |            |    |       |
| 3   | 4 mg SL                                                                                                                                    |                                                                                                                                                                                            |                                                                                                                                                                                                                                                                                                                                                                                                                                                                                                                                                                                                                              |   |           |   |         |   |         |     |                             |   |         |   |          |   |          |   |          |   |          |    |          |    |          |    |            |    |            |    |       |
| 4   | 6 mg SL                                                                                                                                    |                                                                                                                                                                                            |                                                                                                                                                                                                                                                                                                                                                                                                                                                                                                                                                                                                                              |   |           |   |         |   |         |     |                             |   |         |   |          |   |          |   |          |   |          |    |          |    |          |    |            |    |            |    |       |
| 5   | 8 mg SL                                                                                                                                    |                                                                                                                                                                                            |                                                                                                                                                                                                                                                                                                                                                                                                                                                                                                                                                                                                                              |   |           |   |         |   |         |     |                             |   |         |   |          |   |          |   |          |   |          |    |          |    |          |    |            |    |            |    |       |
| 6   | 10 mg SL                                                                                                                                   |                                                                                                                                                                                            |                                                                                                                                                                                                                                                                                                                                                                                                                                                                                                                                                                                                                              |   |           |   |         |   |         |     |                             |   |         |   |          |   |          |   |          |   |          |    |          |    |          |    |            |    |            |    |       |
| 7   | 12 mg SL                                                                                                                                   |                                                                                                                                                                                            |                                                                                                                                                                                                                                                                                                                                                                                                                                                                                                                                                                                                                              |   |           |   |         |   |         |     |                             |   |         |   |          |   |          |   |          |   |          |    |          |    |          |    |            |    |            |    |       |
| 8   | 14 mg SL                                                                                                                                   |                                                                                                                                                                                            |                                                                                                                                                                                                                                                                                                                                                                                                                                                                                                                                                                                                                              |   |           |   |         |   |         |     |                             |   |         |   |          |   |          |   |          |   |          |    |          |    |          |    |            |    |            |    |       |
| 9   | 16 mg SL                                                                                                                                   |                                                                                                                                                                                            |                                                                                                                                                                                                                                                                                                                                                                                                                                                                                                                                                                                                                              |   |           |   |         |   |         |     |                             |   |         |   |          |   |          |   |          |   |          |    |          |    |          |    |            |    |            |    |       |
| 10  | 24 mg SL                                                                                                                                   |                                                                                                                                                                                            |                                                                                                                                                                                                                                                                                                                                                                                                                                                                                                                                                                                                                              |   |           |   |         |   |         |     |                             |   |         |   |          |   |          |   |          |   |          |    |          |    |          |    |            |    |            |    |       |
| 11  | 32 mg SL                                                                                                                                   |                                                                                                                                                                                            |                                                                                                                                                                                                                                                                                                                                                                                                                                                                                                                                                                                                                              |   |           |   |         |   |         |     |                             |   |         |   |          |   |          |   |          |   |          |    |          |    |          |    |            |    |            |    |       |
| 12  | 10mcgpatch                                                                                                                                 |                                                                                                                                                                                            |                                                                                                                                                                                                                                                                                                                                                                                                                                                                                                                                                                                                                              |   |           |   |         |   |         |     |                             |   |         |   |          |   |          |   |          |   |          |    |          |    |          |    |            |    |            |    |       |
| 13  | 20mcgpatch                                                                                                                                 |                                                                                                                                                                                            |                                                                                                                                                                                                                                                                                                                                                                                                                                                                                                                                                                                                                              |   |           |   |         |   |         |     |                             |   |         |   |          |   |          |   |          |   |          |    |          |    |          |    |            |    |            |    |       |
| 14  | Other                                                                                                                                      |                                                                                                                                                                                            |                                                                                                                                                                                                                                                                                                                                                                                                                                                                                                                                                                                                                              |   |           |   |         |   |         |     |                             |   |         |   |          |   |          |   |          |   |          |    |          |    |          |    |            |    |            |    |       |
| 125 | <b>fourthbup_oth</b><br><br><b>Show the field ONLY if:</b><br><b>[fourthbup] = '14'</b>                                                    | <b>If "Other," please specify.</b>                                                                                                                                                         | <b>text, Required</b>                                                                                                                                                                                                                                                                                                                                                                                                                                                                                                                                                                                                        |   |           |   |         |   |         |     |                             |   |         |   |          |   |          |   |          |   |          |    |          |    |          |    |            |    |            |    |       |
| 126 | <b>fourthbup_time</b><br><br><b>Show the field ONLY if:</b><br><b>[bup_ed] = '4' or [bup_ed] = '5' or [bup_ed] = '6' or [bup_ed] = '7'</b> | <b>What date and time was this dose administered?</b>                                                                                                                                      | <b>text (datetime_mdy), Required</b>                                                                                                                                                                                                                                                                                                                                                                                                                                                                                                                                                                                         |   |           |   |         |   |         |     |                             |   |         |   |          |   |          |   |          |   |          |    |          |    |          |    |            |    |            |    |       |
| 127 | <b>bup_admit_4</b><br><br><b>Show the field ONLY if:</b><br><b>[bup_ed] = '4' or [bup_ed] = '5' or [bup_ed] = '6' or [bup_ed] = '7'</b>    | <b>Was this dose of buprenorphine ordered through Soarian Clinicals?</b>                                                                                                                   | <b>yesno, Required</b><br><table border="1" data-bbox="1045 1165 1138 1255"> <tr><td>1</td><td>Yes</td></tr> <tr><td>0</td><td>No</td></tr> </table>                                                                                                                                                                                                                                                                                                                                                                                                                                                                         | 1 | Yes       | 0 | No      |   |         |     |                             |   |         |   |          |   |          |   |          |   |          |    |          |    |          |    |            |    |            |    |       |
| 1   | Yes                                                                                                                                        |                                                                                                                                                                                            |                                                                                                                                                                                                                                                                                                                                                                                                                                                                                                                                                                                                                              |   |           |   |         |   |         |     |                             |   |         |   |          |   |          |   |          |   |          |    |          |    |          |    |            |    |            |    |       |
| 0   | No                                                                                                                                         |                                                                                                                                                                                            |                                                                                                                                                                                                                                                                                                                                                                                                                                                                                                                                                                                                                              |   |           |   |         |   |         |     |                             |   |         |   |          |   |          |   |          |   |          |    |          |    |          |    |            |    |            |    |       |
| 128 | <b>post_bup_pt_4</b><br><br><b>Show the field ONLY if:</b><br><b>[bup_ed] = '4' or [bup_ed] = '5' or [bup_ed] = '6' or [bup_ed] = '7'</b>  | <b>Does the patient feel same, better, or worse within 90 minutes after this buprenorphine administration?</b><br><br><i>Remember to look in "Vitals" for a decrease/increase in pain.</i> | <b>radio, Required</b><br><table border="1" data-bbox="1045 1356 1450 1541"> <tr><td>1</td><td>Same</td></tr> <tr><td>2</td><td>Better</td></tr> <tr><td>3</td><td>Worse</td></tr> <tr><td>999</td><td>No documentation or unclear</td></tr> </table>                                                                                                                                                                                                                                                                                                                                                                        | 1 | Same      | 2 | Better  | 3 | Worse   | 999 | No documentation or unclear |   |         |   |          |   |          |   |          |   |          |    |          |    |          |    |            |    |            |    |       |
| 1   | Same                                                                                                                                       |                                                                                                                                                                                            |                                                                                                                                                                                                                                                                                                                                                                                                                                                                                                                                                                                                                              |   |           |   |         |   |         |     |                             |   |         |   |          |   |          |   |          |   |          |    |          |    |          |    |            |    |            |    |       |
| 2   | Better                                                                                                                                     |                                                                                                                                                                                            |                                                                                                                                                                                                                                                                                                                                                                                                                                                                                                                                                                                                                              |   |           |   |         |   |         |     |                             |   |         |   |          |   |          |   |          |   |          |    |          |    |          |    |            |    |            |    |       |
| 3   | Worse                                                                                                                                      |                                                                                                                                                                                            |                                                                                                                                                                                                                                                                                                                                                                                                                                                                                                                                                                                                                              |   |           |   |         |   |         |     |                             |   |         |   |          |   |          |   |          |   |          |    |          |    |          |    |            |    |            |    |       |
| 999 | No documentation or unclear                                                                                                                |                                                                                                                                                                                            |                                                                                                                                                                                                                                                                                                                                                                                                                                                                                                                                                                                                                              |   |           |   |         |   |         |     |                             |   |         |   |          |   |          |   |          |   |          |    |          |    |          |    |            |    |            |    |       |

|     |                                                                                                                         |                                                                                                                                                                                            |                                                                                                                                                                                                                                                                                                                                                                                                                                                                                                                                                                                                                              |   |           |   |         |   |         |     |                             |   |         |   |          |   |          |   |          |   |          |    |          |    |          |    |            |    |            |    |       |
|-----|-------------------------------------------------------------------------------------------------------------------------|--------------------------------------------------------------------------------------------------------------------------------------------------------------------------------------------|------------------------------------------------------------------------------------------------------------------------------------------------------------------------------------------------------------------------------------------------------------------------------------------------------------------------------------------------------------------------------------------------------------------------------------------------------------------------------------------------------------------------------------------------------------------------------------------------------------------------------|---|-----------|---|---------|---|---------|-----|-----------------------------|---|---------|---|----------|---|----------|---|----------|---|----------|----|----------|----|----------|----|------------|----|------------|----|-------|
| 129 | <b>fifthbup</b><br><br><b>Show the field ONLY if:</b><br><b>[bup_ed] = '5' or [bup_ed] = '6' or [bup_ed] = '7'</b>      | <b>Fifth bup dose</b>                                                                                                                                                                      | <b>radio, Required</b><br><table border="1" data-bbox="1047 115 1260 781"> <tr><td>1</td><td>0.3 mg IV</td></tr> <tr><td>2</td><td>2 mg SL</td></tr> <tr><td>3</td><td>4 mg SL</td></tr> <tr><td>4</td><td>6 mg SL</td></tr> <tr><td>5</td><td>8 mg SL</td></tr> <tr><td>6</td><td>10 mg SL</td></tr> <tr><td>7</td><td>12 mg SL</td></tr> <tr><td>8</td><td>14 mg SL</td></tr> <tr><td>9</td><td>16 mg SL</td></tr> <tr><td>10</td><td>24 mg SL</td></tr> <tr><td>11</td><td>32 mg SL</td></tr> <tr><td>12</td><td>10mcgpatch</td></tr> <tr><td>13</td><td>20mcgpatch</td></tr> <tr><td>14</td><td>Other</td></tr> </table> | 1 | 0.3 mg IV | 2 | 2 mg SL | 3 | 4 mg SL | 4   | 6 mg SL                     | 5 | 8 mg SL | 6 | 10 mg SL | 7 | 12 mg SL | 8 | 14 mg SL | 9 | 16 mg SL | 10 | 24 mg SL | 11 | 32 mg SL | 12 | 10mcgpatch | 13 | 20mcgpatch | 14 | Other |
| 1   | 0.3 mg IV                                                                                                               |                                                                                                                                                                                            |                                                                                                                                                                                                                                                                                                                                                                                                                                                                                                                                                                                                                              |   |           |   |         |   |         |     |                             |   |         |   |          |   |          |   |          |   |          |    |          |    |          |    |            |    |            |    |       |
| 2   | 2 mg SL                                                                                                                 |                                                                                                                                                                                            |                                                                                                                                                                                                                                                                                                                                                                                                                                                                                                                                                                                                                              |   |           |   |         |   |         |     |                             |   |         |   |          |   |          |   |          |   |          |    |          |    |          |    |            |    |            |    |       |
| 3   | 4 mg SL                                                                                                                 |                                                                                                                                                                                            |                                                                                                                                                                                                                                                                                                                                                                                                                                                                                                                                                                                                                              |   |           |   |         |   |         |     |                             |   |         |   |          |   |          |   |          |   |          |    |          |    |          |    |            |    |            |    |       |
| 4   | 6 mg SL                                                                                                                 |                                                                                                                                                                                            |                                                                                                                                                                                                                                                                                                                                                                                                                                                                                                                                                                                                                              |   |           |   |         |   |         |     |                             |   |         |   |          |   |          |   |          |   |          |    |          |    |          |    |            |    |            |    |       |
| 5   | 8 mg SL                                                                                                                 |                                                                                                                                                                                            |                                                                                                                                                                                                                                                                                                                                                                                                                                                                                                                                                                                                                              |   |           |   |         |   |         |     |                             |   |         |   |          |   |          |   |          |   |          |    |          |    |          |    |            |    |            |    |       |
| 6   | 10 mg SL                                                                                                                |                                                                                                                                                                                            |                                                                                                                                                                                                                                                                                                                                                                                                                                                                                                                                                                                                                              |   |           |   |         |   |         |     |                             |   |         |   |          |   |          |   |          |   |          |    |          |    |          |    |            |    |            |    |       |
| 7   | 12 mg SL                                                                                                                |                                                                                                                                                                                            |                                                                                                                                                                                                                                                                                                                                                                                                                                                                                                                                                                                                                              |   |           |   |         |   |         |     |                             |   |         |   |          |   |          |   |          |   |          |    |          |    |          |    |            |    |            |    |       |
| 8   | 14 mg SL                                                                                                                |                                                                                                                                                                                            |                                                                                                                                                                                                                                                                                                                                                                                                                                                                                                                                                                                                                              |   |           |   |         |   |         |     |                             |   |         |   |          |   |          |   |          |   |          |    |          |    |          |    |            |    |            |    |       |
| 9   | 16 mg SL                                                                                                                |                                                                                                                                                                                            |                                                                                                                                                                                                                                                                                                                                                                                                                                                                                                                                                                                                                              |   |           |   |         |   |         |     |                             |   |         |   |          |   |          |   |          |   |          |    |          |    |          |    |            |    |            |    |       |
| 10  | 24 mg SL                                                                                                                |                                                                                                                                                                                            |                                                                                                                                                                                                                                                                                                                                                                                                                                                                                                                                                                                                                              |   |           |   |         |   |         |     |                             |   |         |   |          |   |          |   |          |   |          |    |          |    |          |    |            |    |            |    |       |
| 11  | 32 mg SL                                                                                                                |                                                                                                                                                                                            |                                                                                                                                                                                                                                                                                                                                                                                                                                                                                                                                                                                                                              |   |           |   |         |   |         |     |                             |   |         |   |          |   |          |   |          |   |          |    |          |    |          |    |            |    |            |    |       |
| 12  | 10mcgpatch                                                                                                              |                                                                                                                                                                                            |                                                                                                                                                                                                                                                                                                                                                                                                                                                                                                                                                                                                                              |   |           |   |         |   |         |     |                             |   |         |   |          |   |          |   |          |   |          |    |          |    |          |    |            |    |            |    |       |
| 13  | 20mcgpatch                                                                                                              |                                                                                                                                                                                            |                                                                                                                                                                                                                                                                                                                                                                                                                                                                                                                                                                                                                              |   |           |   |         |   |         |     |                             |   |         |   |          |   |          |   |          |   |          |    |          |    |          |    |            |    |            |    |       |
| 14  | Other                                                                                                                   |                                                                                                                                                                                            |                                                                                                                                                                                                                                                                                                                                                                                                                                                                                                                                                                                                                              |   |           |   |         |   |         |     |                             |   |         |   |          |   |          |   |          |   |          |    |          |    |          |    |            |    |            |    |       |
| 130 | <b>fifthbup_oth</b><br><br><b>Show the field ONLY if:</b><br><b>[fifthbup] = '14'</b>                                   | <b>If "Other," please specify.</b>                                                                                                                                                         | <b>text, Required</b>                                                                                                                                                                                                                                                                                                                                                                                                                                                                                                                                                                                                        |   |           |   |         |   |         |     |                             |   |         |   |          |   |          |   |          |   |          |    |          |    |          |    |            |    |            |    |       |
| 131 | <b>fifthbup_time</b><br><br><b>Show the field ONLY if:</b><br><b>[bup_ed] = '5' or [bup_ed] = '6' or [bup_ed] = '7'</b> | <b>What date and time was this dose administered?</b>                                                                                                                                      | <b>text (datetime_mdy), Required</b>                                                                                                                                                                                                                                                                                                                                                                                                                                                                                                                                                                                         |   |           |   |         |   |         |     |                             |   |         |   |          |   |          |   |          |   |          |    |          |    |          |    |            |    |            |    |       |
| 132 | <b>bup_admit_5</b><br><br><b>Show the field ONLY if:</b><br><b>[bup_ed] = '5' or [bup_ed] = '6' or [bup_ed] = '7'</b>   | <b>Was this dose of buprenorphine ordered through Soarian Clinicals?</b>                                                                                                                   | <b>yesno, Required</b><br><table border="1" data-bbox="1047 1131 1138 1226"> <tr><td>1</td><td>Yes</td></tr> <tr><td>0</td><td>No</td></tr> </table>                                                                                                                                                                                                                                                                                                                                                                                                                                                                         | 1 | Yes       | 0 | No      |   |         |     |                             |   |         |   |          |   |          |   |          |   |          |    |          |    |          |    |            |    |            |    |       |
| 1   | Yes                                                                                                                     |                                                                                                                                                                                            |                                                                                                                                                                                                                                                                                                                                                                                                                                                                                                                                                                                                                              |   |           |   |         |   |         |     |                             |   |         |   |          |   |          |   |          |   |          |    |          |    |          |    |            |    |            |    |       |
| 0   | No                                                                                                                      |                                                                                                                                                                                            |                                                                                                                                                                                                                                                                                                                                                                                                                                                                                                                                                                                                                              |   |           |   |         |   |         |     |                             |   |         |   |          |   |          |   |          |   |          |    |          |    |          |    |            |    |            |    |       |
| 133 | <b>post_bup_pt_5</b><br><br><b>Show the field ONLY if:</b><br><b>[bup_ed] = '5' or [bup_ed] = '6' or [bup_ed] = '7'</b> | <b>Does the patient feel same, better, or worse within 90 minutes after this buprenorphine administration?</b><br><br><i>Remember to look in "Vitals" for a decrease/increase in pain.</i> | <b>radio, Required</b><br><table border="1" data-bbox="1047 1289 1450 1476"> <tr><td>1</td><td>Same</td></tr> <tr><td>2</td><td>Better</td></tr> <tr><td>3</td><td>Worse</td></tr> <tr><td>999</td><td>No documentation or unclear</td></tr> </table>                                                                                                                                                                                                                                                                                                                                                                        | 1 | Same      | 2 | Better  | 3 | Worse   | 999 | No documentation or unclear |   |         |   |          |   |          |   |          |   |          |    |          |    |          |    |            |    |            |    |       |
| 1   | Same                                                                                                                    |                                                                                                                                                                                            |                                                                                                                                                                                                                                                                                                                                                                                                                                                                                                                                                                                                                              |   |           |   |         |   |         |     |                             |   |         |   |          |   |          |   |          |   |          |    |          |    |          |    |            |    |            |    |       |
| 2   | Better                                                                                                                  |                                                                                                                                                                                            |                                                                                                                                                                                                                                                                                                                                                                                                                                                                                                                                                                                                                              |   |           |   |         |   |         |     |                             |   |         |   |          |   |          |   |          |   |          |    |          |    |          |    |            |    |            |    |       |
| 3   | Worse                                                                                                                   |                                                                                                                                                                                            |                                                                                                                                                                                                                                                                                                                                                                                                                                                                                                                                                                                                                              |   |           |   |         |   |         |     |                             |   |         |   |          |   |          |   |          |   |          |    |          |    |          |    |            |    |            |    |       |
| 999 | No documentation or unclear                                                                                             |                                                                                                                                                                                            |                                                                                                                                                                                                                                                                                                                                                                                                                                                                                                                                                                                                                              |   |           |   |         |   |         |     |                             |   |         |   |          |   |          |   |          |   |          |    |          |    |          |    |            |    |            |    |       |

|     |                                                                                                       |                                                                                                                                                                                            |                                                                                                                                                                                                                                                                                                                                                                                                                                                                                                                                                                                                                              |   |           |   |         |   |         |     |                             |   |         |   |          |   |          |   |          |   |          |    |          |    |          |    |            |    |            |    |       |
|-----|-------------------------------------------------------------------------------------------------------|--------------------------------------------------------------------------------------------------------------------------------------------------------------------------------------------|------------------------------------------------------------------------------------------------------------------------------------------------------------------------------------------------------------------------------------------------------------------------------------------------------------------------------------------------------------------------------------------------------------------------------------------------------------------------------------------------------------------------------------------------------------------------------------------------------------------------------|---|-----------|---|---------|---|---------|-----|-----------------------------|---|---------|---|----------|---|----------|---|----------|---|----------|----|----------|----|----------|----|------------|----|------------|----|-------|
| 134 | <b>sixthbup</b><br><br><b>Show the field ONLY if:</b><br><b>[bup_ed] = '6' or [bup_ed] = '7'</b>      | <b>Sixth bup dose</b>                                                                                                                                                                      | <b>radio, Required</b><br><table border="1" data-bbox="1045 113 1260 783"> <tr><td>1</td><td>0.3 mg IV</td></tr> <tr><td>2</td><td>2 mg SL</td></tr> <tr><td>3</td><td>4 mg SL</td></tr> <tr><td>4</td><td>6 mg SL</td></tr> <tr><td>5</td><td>8 mg SL</td></tr> <tr><td>6</td><td>10 mg SL</td></tr> <tr><td>7</td><td>12 mg SL</td></tr> <tr><td>8</td><td>14 mg SL</td></tr> <tr><td>9</td><td>16 mg SL</td></tr> <tr><td>10</td><td>24 mg SL</td></tr> <tr><td>11</td><td>32 mg SL</td></tr> <tr><td>12</td><td>10mcgpatch</td></tr> <tr><td>13</td><td>20mcgpatch</td></tr> <tr><td>14</td><td>Other</td></tr> </table> | 1 | 0.3 mg IV | 2 | 2 mg SL | 3 | 4 mg SL | 4   | 6 mg SL                     | 5 | 8 mg SL | 6 | 10 mg SL | 7 | 12 mg SL | 8 | 14 mg SL | 9 | 16 mg SL | 10 | 24 mg SL | 11 | 32 mg SL | 12 | 10mcgpatch | 13 | 20mcgpatch | 14 | Other |
| 1   | 0.3 mg IV                                                                                             |                                                                                                                                                                                            |                                                                                                                                                                                                                                                                                                                                                                                                                                                                                                                                                                                                                              |   |           |   |         |   |         |     |                             |   |         |   |          |   |          |   |          |   |          |    |          |    |          |    |            |    |            |    |       |
| 2   | 2 mg SL                                                                                               |                                                                                                                                                                                            |                                                                                                                                                                                                                                                                                                                                                                                                                                                                                                                                                                                                                              |   |           |   |         |   |         |     |                             |   |         |   |          |   |          |   |          |   |          |    |          |    |          |    |            |    |            |    |       |
| 3   | 4 mg SL                                                                                               |                                                                                                                                                                                            |                                                                                                                                                                                                                                                                                                                                                                                                                                                                                                                                                                                                                              |   |           |   |         |   |         |     |                             |   |         |   |          |   |          |   |          |   |          |    |          |    |          |    |            |    |            |    |       |
| 4   | 6 mg SL                                                                                               |                                                                                                                                                                                            |                                                                                                                                                                                                                                                                                                                                                                                                                                                                                                                                                                                                                              |   |           |   |         |   |         |     |                             |   |         |   |          |   |          |   |          |   |          |    |          |    |          |    |            |    |            |    |       |
| 5   | 8 mg SL                                                                                               |                                                                                                                                                                                            |                                                                                                                                                                                                                                                                                                                                                                                                                                                                                                                                                                                                                              |   |           |   |         |   |         |     |                             |   |         |   |          |   |          |   |          |   |          |    |          |    |          |    |            |    |            |    |       |
| 6   | 10 mg SL                                                                                              |                                                                                                                                                                                            |                                                                                                                                                                                                                                                                                                                                                                                                                                                                                                                                                                                                                              |   |           |   |         |   |         |     |                             |   |         |   |          |   |          |   |          |   |          |    |          |    |          |    |            |    |            |    |       |
| 7   | 12 mg SL                                                                                              |                                                                                                                                                                                            |                                                                                                                                                                                                                                                                                                                                                                                                                                                                                                                                                                                                                              |   |           |   |         |   |         |     |                             |   |         |   |          |   |          |   |          |   |          |    |          |    |          |    |            |    |            |    |       |
| 8   | 14 mg SL                                                                                              |                                                                                                                                                                                            |                                                                                                                                                                                                                                                                                                                                                                                                                                                                                                                                                                                                                              |   |           |   |         |   |         |     |                             |   |         |   |          |   |          |   |          |   |          |    |          |    |          |    |            |    |            |    |       |
| 9   | 16 mg SL                                                                                              |                                                                                                                                                                                            |                                                                                                                                                                                                                                                                                                                                                                                                                                                                                                                                                                                                                              |   |           |   |         |   |         |     |                             |   |         |   |          |   |          |   |          |   |          |    |          |    |          |    |            |    |            |    |       |
| 10  | 24 mg SL                                                                                              |                                                                                                                                                                                            |                                                                                                                                                                                                                                                                                                                                                                                                                                                                                                                                                                                                                              |   |           |   |         |   |         |     |                             |   |         |   |          |   |          |   |          |   |          |    |          |    |          |    |            |    |            |    |       |
| 11  | 32 mg SL                                                                                              |                                                                                                                                                                                            |                                                                                                                                                                                                                                                                                                                                                                                                                                                                                                                                                                                                                              |   |           |   |         |   |         |     |                             |   |         |   |          |   |          |   |          |   |          |    |          |    |          |    |            |    |            |    |       |
| 12  | 10mcgpatch                                                                                            |                                                                                                                                                                                            |                                                                                                                                                                                                                                                                                                                                                                                                                                                                                                                                                                                                                              |   |           |   |         |   |         |     |                             |   |         |   |          |   |          |   |          |   |          |    |          |    |          |    |            |    |            |    |       |
| 13  | 20mcgpatch                                                                                            |                                                                                                                                                                                            |                                                                                                                                                                                                                                                                                                                                                                                                                                                                                                                                                                                                                              |   |           |   |         |   |         |     |                             |   |         |   |          |   |          |   |          |   |          |    |          |    |          |    |            |    |            |    |       |
| 14  | Other                                                                                                 |                                                                                                                                                                                            |                                                                                                                                                                                                                                                                                                                                                                                                                                                                                                                                                                                                                              |   |           |   |         |   |         |     |                             |   |         |   |          |   |          |   |          |   |          |    |          |    |          |    |            |    |            |    |       |
| 135 | <b>sixthbup_oth</b><br><br><b>Show the field ONLY if:</b><br><b>[sixthbup] = '14'</b>                 | <b>If "Other," please specify.</b>                                                                                                                                                         | <b>text, Required</b>                                                                                                                                                                                                                                                                                                                                                                                                                                                                                                                                                                                                        |   |           |   |         |   |         |     |                             |   |         |   |          |   |          |   |          |   |          |    |          |    |          |    |            |    |            |    |       |
| 136 | <b>sixthbup_time</b><br><br><b>Show the field ONLY if:</b><br><b>[bup_ed] = '6' or [bup_ed] = '7'</b> | <b>What date and time was this dose administered?</b>                                                                                                                                      | <b>text (datetime_mdy), Required</b>                                                                                                                                                                                                                                                                                                                                                                                                                                                                                                                                                                                         |   |           |   |         |   |         |     |                             |   |         |   |          |   |          |   |          |   |          |    |          |    |          |    |            |    |            |    |       |
| 137 | <b>bup_admit_6</b><br><br><b>Show the field ONLY if:</b><br><b>[bup_ed] = '6' or [bup_ed] = '7'</b>   | <b>Was this dose of buprenorphine ordered through Soarian Clinicals?</b>                                                                                                                   | <b>yesno, Required</b><br><table border="1" data-bbox="1045 1129 1138 1226"> <tr><td>1</td><td>Yes</td></tr> <tr><td>0</td><td>No</td></tr> </table>                                                                                                                                                                                                                                                                                                                                                                                                                                                                         | 1 | Yes       | 0 | No      |   |         |     |                             |   |         |   |          |   |          |   |          |   |          |    |          |    |          |    |            |    |            |    |       |
| 1   | Yes                                                                                                   |                                                                                                                                                                                            |                                                                                                                                                                                                                                                                                                                                                                                                                                                                                                                                                                                                                              |   |           |   |         |   |         |     |                             |   |         |   |          |   |          |   |          |   |          |    |          |    |          |    |            |    |            |    |       |
| 0   | No                                                                                                    |                                                                                                                                                                                            |                                                                                                                                                                                                                                                                                                                                                                                                                                                                                                                                                                                                                              |   |           |   |         |   |         |     |                             |   |         |   |          |   |          |   |          |   |          |    |          |    |          |    |            |    |            |    |       |
| 138 | <b>post_bup_pt_6</b><br><br><b>Show the field ONLY if:</b><br><b>[bup_ed] = '6' or [bup_ed] = '7'</b> | <b>Does the patient feel same, better, or worse within 90 minutes after this buprenorphine administration?</b><br><br><i>Remember to look in "Vitals" for a decrease/increase in pain.</i> | <b>radio, Required</b><br><table border="1" data-bbox="1045 1289 1450 1478"> <tr><td>1</td><td>Same</td></tr> <tr><td>2</td><td>Better</td></tr> <tr><td>3</td><td>Worse</td></tr> <tr><td>999</td><td>No documentation or unclear</td></tr> </table>                                                                                                                                                                                                                                                                                                                                                                        | 1 | Same      | 2 | Better  | 3 | Worse   | 999 | No documentation or unclear |   |         |   |          |   |          |   |          |   |          |    |          |    |          |    |            |    |            |    |       |
| 1   | Same                                                                                                  |                                                                                                                                                                                            |                                                                                                                                                                                                                                                                                                                                                                                                                                                                                                                                                                                                                              |   |           |   |         |   |         |     |                             |   |         |   |          |   |          |   |          |   |          |    |          |    |          |    |            |    |            |    |       |
| 2   | Better                                                                                                |                                                                                                                                                                                            |                                                                                                                                                                                                                                                                                                                                                                                                                                                                                                                                                                                                                              |   |           |   |         |   |         |     |                             |   |         |   |          |   |          |   |          |   |          |    |          |    |          |    |            |    |            |    |       |
| 3   | Worse                                                                                                 |                                                                                                                                                                                            |                                                                                                                                                                                                                                                                                                                                                                                                                                                                                                                                                                                                                              |   |           |   |         |   |         |     |                             |   |         |   |          |   |          |   |          |   |          |    |          |    |          |    |            |    |            |    |       |
| 999 | No documentation or unclear                                                                           |                                                                                                                                                                                            |                                                                                                                                                                                                                                                                                                                                                                                                                                                                                                                                                                                                                              |   |           |   |         |   |         |     |                             |   |         |   |          |   |          |   |          |   |          |    |          |    |          |    |            |    |            |    |       |

|     |                                                                         |                                                                                                                                                                                 |                                                                                                                                                                                                                                                                                                                                                                                                                                                                                                                                                                                                                              |   |           |   |         |   |         |     |                             |   |         |   |          |   |          |   |          |   |          |    |          |    |          |    |            |    |            |    |       |
|-----|-------------------------------------------------------------------------|---------------------------------------------------------------------------------------------------------------------------------------------------------------------------------|------------------------------------------------------------------------------------------------------------------------------------------------------------------------------------------------------------------------------------------------------------------------------------------------------------------------------------------------------------------------------------------------------------------------------------------------------------------------------------------------------------------------------------------------------------------------------------------------------------------------------|---|-----------|---|---------|---|---------|-----|-----------------------------|---|---------|---|----------|---|----------|---|----------|---|----------|----|----------|----|----------|----|------------|----|------------|----|-------|
| 139 | <b>seventhbup</b><br>Show the field ONLY if:<br>[bup_ed] = '7'          | <b>Seventh bup dose</b>                                                                                                                                                         | <b>radio, Required</b><br><table border="1" data-bbox="1047 115 1258 785"> <tr><td>1</td><td>0.3 mg IV</td></tr> <tr><td>2</td><td>2 mg SL</td></tr> <tr><td>3</td><td>4 mg SL</td></tr> <tr><td>4</td><td>6 mg SL</td></tr> <tr><td>5</td><td>8 mg SL</td></tr> <tr><td>6</td><td>10 mg SL</td></tr> <tr><td>7</td><td>12 mg SL</td></tr> <tr><td>8</td><td>14 mg SL</td></tr> <tr><td>9</td><td>16 mg SL</td></tr> <tr><td>10</td><td>24 mg SL</td></tr> <tr><td>11</td><td>32 mg SL</td></tr> <tr><td>12</td><td>10mcgpatch</td></tr> <tr><td>13</td><td>20mcgpatch</td></tr> <tr><td>14</td><td>Other</td></tr> </table> | 1 | 0.3 mg IV | 2 | 2 mg SL | 3 | 4 mg SL | 4   | 6 mg SL                     | 5 | 8 mg SL | 6 | 10 mg SL | 7 | 12 mg SL | 8 | 14 mg SL | 9 | 16 mg SL | 10 | 24 mg SL | 11 | 32 mg SL | 12 | 10mcgpatch | 13 | 20mcgpatch | 14 | Other |
| 1   | 0.3 mg IV                                                               |                                                                                                                                                                                 |                                                                                                                                                                                                                                                                                                                                                                                                                                                                                                                                                                                                                              |   |           |   |         |   |         |     |                             |   |         |   |          |   |          |   |          |   |          |    |          |    |          |    |            |    |            |    |       |
| 2   | 2 mg SL                                                                 |                                                                                                                                                                                 |                                                                                                                                                                                                                                                                                                                                                                                                                                                                                                                                                                                                                              |   |           |   |         |   |         |     |                             |   |         |   |          |   |          |   |          |   |          |    |          |    |          |    |            |    |            |    |       |
| 3   | 4 mg SL                                                                 |                                                                                                                                                                                 |                                                                                                                                                                                                                                                                                                                                                                                                                                                                                                                                                                                                                              |   |           |   |         |   |         |     |                             |   |         |   |          |   |          |   |          |   |          |    |          |    |          |    |            |    |            |    |       |
| 4   | 6 mg SL                                                                 |                                                                                                                                                                                 |                                                                                                                                                                                                                                                                                                                                                                                                                                                                                                                                                                                                                              |   |           |   |         |   |         |     |                             |   |         |   |          |   |          |   |          |   |          |    |          |    |          |    |            |    |            |    |       |
| 5   | 8 mg SL                                                                 |                                                                                                                                                                                 |                                                                                                                                                                                                                                                                                                                                                                                                                                                                                                                                                                                                                              |   |           |   |         |   |         |     |                             |   |         |   |          |   |          |   |          |   |          |    |          |    |          |    |            |    |            |    |       |
| 6   | 10 mg SL                                                                |                                                                                                                                                                                 |                                                                                                                                                                                                                                                                                                                                                                                                                                                                                                                                                                                                                              |   |           |   |         |   |         |     |                             |   |         |   |          |   |          |   |          |   |          |    |          |    |          |    |            |    |            |    |       |
| 7   | 12 mg SL                                                                |                                                                                                                                                                                 |                                                                                                                                                                                                                                                                                                                                                                                                                                                                                                                                                                                                                              |   |           |   |         |   |         |     |                             |   |         |   |          |   |          |   |          |   |          |    |          |    |          |    |            |    |            |    |       |
| 8   | 14 mg SL                                                                |                                                                                                                                                                                 |                                                                                                                                                                                                                                                                                                                                                                                                                                                                                                                                                                                                                              |   |           |   |         |   |         |     |                             |   |         |   |          |   |          |   |          |   |          |    |          |    |          |    |            |    |            |    |       |
| 9   | 16 mg SL                                                                |                                                                                                                                                                                 |                                                                                                                                                                                                                                                                                                                                                                                                                                                                                                                                                                                                                              |   |           |   |         |   |         |     |                             |   |         |   |          |   |          |   |          |   |          |    |          |    |          |    |            |    |            |    |       |
| 10  | 24 mg SL                                                                |                                                                                                                                                                                 |                                                                                                                                                                                                                                                                                                                                                                                                                                                                                                                                                                                                                              |   |           |   |         |   |         |     |                             |   |         |   |          |   |          |   |          |   |          |    |          |    |          |    |            |    |            |    |       |
| 11  | 32 mg SL                                                                |                                                                                                                                                                                 |                                                                                                                                                                                                                                                                                                                                                                                                                                                                                                                                                                                                                              |   |           |   |         |   |         |     |                             |   |         |   |          |   |          |   |          |   |          |    |          |    |          |    |            |    |            |    |       |
| 12  | 10mcgpatch                                                              |                                                                                                                                                                                 |                                                                                                                                                                                                                                                                                                                                                                                                                                                                                                                                                                                                                              |   |           |   |         |   |         |     |                             |   |         |   |          |   |          |   |          |   |          |    |          |    |          |    |            |    |            |    |       |
| 13  | 20mcgpatch                                                              |                                                                                                                                                                                 |                                                                                                                                                                                                                                                                                                                                                                                                                                                                                                                                                                                                                              |   |           |   |         |   |         |     |                             |   |         |   |          |   |          |   |          |   |          |    |          |    |          |    |            |    |            |    |       |
| 14  | Other                                                                   |                                                                                                                                                                                 |                                                                                                                                                                                                                                                                                                                                                                                                                                                                                                                                                                                                                              |   |           |   |         |   |         |     |                             |   |         |   |          |   |          |   |          |   |          |    |          |    |          |    |            |    |            |    |       |
| 140 | <b>seventhbup_oth</b><br>Show the field ONLY if:<br>[seventhbup] = '14' | If "Other," please specify.                                                                                                                                                     | text, Required                                                                                                                                                                                                                                                                                                                                                                                                                                                                                                                                                                                                               |   |           |   |         |   |         |     |                             |   |         |   |          |   |          |   |          |   |          |    |          |    |          |    |            |    |            |    |       |
| 141 | <b>seventhbup_time</b><br>Show the field ONLY if:<br>[bup_ed] = '7'     | What date and time was this dose administered?                                                                                                                                  | text (datetime_mdy), Required                                                                                                                                                                                                                                                                                                                                                                                                                                                                                                                                                                                                |   |           |   |         |   |         |     |                             |   |         |   |          |   |          |   |          |   |          |    |          |    |          |    |            |    |            |    |       |
| 142 | <b>bup_admit_7</b><br>Show the field ONLY if:<br>[bup_ed] = '7'         | Was this dose of buprenorphine ordered through Soarian Clinicals?                                                                                                               | <table border="1" data-bbox="1047 1098 1138 1194"> <tr><td>1</td><td>Yes</td></tr> <tr><td>0</td><td>No</td></tr> </table> Required                                                                                                                                                                                                                                                                                                                                                                                                                                                                                          | 1 | Yes       | 0 | No      |   |         |     |                             |   |         |   |          |   |          |   |          |   |          |    |          |    |          |    |            |    |            |    |       |
| 1   | Yes                                                                     |                                                                                                                                                                                 |                                                                                                                                                                                                                                                                                                                                                                                                                                                                                                                                                                                                                              |   |           |   |         |   |         |     |                             |   |         |   |          |   |          |   |          |   |          |    |          |    |          |    |            |    |            |    |       |
| 0   | No                                                                      |                                                                                                                                                                                 |                                                                                                                                                                                                                                                                                                                                                                                                                                                                                                                                                                                                                              |   |           |   |         |   |         |     |                             |   |         |   |          |   |          |   |          |   |          |    |          |    |          |    |            |    |            |    |       |
| 143 | <b>post_bup_pt_7</b><br>Show the field ONLY if:<br>[bup_ed] = '7'       | Does the patient feel same, better, or worse within 90 minutes after this buprenorphine administration?<br><i>Remember to look in "Vitals" for a decrease/increase in pain.</i> | <table border="1" data-bbox="1047 1243 1450 1436"> <tr><td>1</td><td>Same</td></tr> <tr><td>2</td><td>Better</td></tr> <tr><td>3</td><td>Worse</td></tr> <tr><td>999</td><td>No documentation or unclear</td></tr> </table> radio, Required                                                                                                                                                                                                                                                                                                                                                                                  | 1 | Same      | 2 | Better  | 3 | Worse   | 999 | No documentation or unclear |   |         |   |          |   |          |   |          |   |          |    |          |    |          |    |            |    |            |    |       |
| 1   | Same                                                                    |                                                                                                                                                                                 |                                                                                                                                                                                                                                                                                                                                                                                                                                                                                                                                                                                                                              |   |           |   |         |   |         |     |                             |   |         |   |          |   |          |   |          |   |          |    |          |    |          |    |            |    |            |    |       |
| 2   | Better                                                                  |                                                                                                                                                                                 |                                                                                                                                                                                                                                                                                                                                                                                                                                                                                                                                                                                                                              |   |           |   |         |   |         |     |                             |   |         |   |          |   |          |   |          |   |          |    |          |    |          |    |            |    |            |    |       |
| 3   | Worse                                                                   |                                                                                                                                                                                 |                                                                                                                                                                                                                                                                                                                                                                                                                                                                                                                                                                                                                              |   |           |   |         |   |         |     |                             |   |         |   |          |   |          |   |          |   |          |    |          |    |          |    |            |    |            |    |       |
| 999 | No documentation or unclear                                             |                                                                                                                                                                                 |                                                                                                                                                                                                                                                                                                                                                                                                                                                                                                                                                                                                                              |   |           |   |         |   |         |     |                             |   |         |   |          |   |          |   |          |   |          |    |          |    |          |    |            |    |            |    |       |
| 144 | <b>buptotalcheck_1</b><br>Show the field ONLY if:<br>[bup_ed] = '1'     | You have indicated bup administration of [firstbup]. Is this correct?                                                                                                           | <table border="1" data-bbox="1047 1484 1138 1581"> <tr><td>1</td><td>Yes</td></tr> <tr><td>0</td><td>No</td></tr> </table> Required                                                                                                                                                                                                                                                                                                                                                                                                                                                                                          | 1 | Yes       | 0 | No      |   |         |     |                             |   |         |   |          |   |          |   |          |   |          |    |          |    |          |    |            |    |            |    |       |
| 1   | Yes                                                                     |                                                                                                                                                                                 |                                                                                                                                                                                                                                                                                                                                                                                                                                                                                                                                                                                                                              |   |           |   |         |   |         |     |                             |   |         |   |          |   |          |   |          |   |          |    |          |    |          |    |            |    |            |    |       |
| 0   | No                                                                      |                                                                                                                                                                                 |                                                                                                                                                                                                                                                                                                                                                                                                                                                                                                                                                                                                                              |   |           |   |         |   |         |     |                             |   |         |   |          |   |          |   |          |   |          |    |          |    |          |    |            |    |            |    |       |
| 145 | <b>buptotalcheck_2</b><br>Show the field ONLY if:<br>[bup_ed] = '2'     | You have indicated bup administration of [firstbup], [secondbup]. Is this correct?                                                                                              | <table border="1" data-bbox="1047 1629 1138 1726"> <tr><td>1</td><td>Yes</td></tr> <tr><td>0</td><td>No</td></tr> </table> Required                                                                                                                                                                                                                                                                                                                                                                                                                                                                                          | 1 | Yes       | 0 | No      |   |         |     |                             |   |         |   |          |   |          |   |          |   |          |    |          |    |          |    |            |    |            |    |       |
| 1   | Yes                                                                     |                                                                                                                                                                                 |                                                                                                                                                                                                                                                                                                                                                                                                                                                                                                                                                                                                                              |   |           |   |         |   |         |     |                             |   |         |   |          |   |          |   |          |   |          |    |          |    |          |    |            |    |            |    |       |
| 0   | No                                                                      |                                                                                                                                                                                 |                                                                                                                                                                                                                                                                                                                                                                                                                                                                                                                                                                                                                              |   |           |   |         |   |         |     |                             |   |         |   |          |   |          |   |          |   |          |    |          |    |          |    |            |    |            |    |       |
| 146 | <b>buptotalcheck_3</b><br>Show the field ONLY if:<br>[bup_ed] = '3'     | You have indicated bup administration of [firstbup], [secondbup], [thirdbup]. Is this correct?                                                                                  | <table border="1" data-bbox="1047 1774 1138 1871"> <tr><td>1</td><td>Yes</td></tr> <tr><td>0</td><td>No</td></tr> </table> Required                                                                                                                                                                                                                                                                                                                                                                                                                                                                                          | 1 | Yes       | 0 | No      |   |         |     |                             |   |         |   |          |   |          |   |          |   |          |    |          |    |          |    |            |    |            |    |       |
| 1   | Yes                                                                     |                                                                                                                                                                                 |                                                                                                                                                                                                                                                                                                                                                                                                                                                                                                                                                                                                                              |   |           |   |         |   |         |     |                             |   |         |   |          |   |          |   |          |   |          |    |          |    |          |    |            |    |            |    |       |
| 0   | No                                                                      |                                                                                                                                                                                 |                                                                                                                                                                                                                                                                                                                                                                                                                                                                                                                                                                                                                              |   |           |   |         |   |         |     |                             |   |         |   |          |   |          |   |          |   |          |    |          |    |          |    |            |    |            |    |       |



|     |                                                                                                                                                                                                                                                                 |                                                                                                                                                   |                                                                                                               |   |     |   |    |
|-----|-----------------------------------------------------------------------------------------------------------------------------------------------------------------------------------------------------------------------------------------------------------------|---------------------------------------------------------------------------------------------------------------------------------------------------|---------------------------------------------------------------------------------------------------------------|---|-----|---|----|
| 147 | <b>buptotalcheck_4</b><br>Show the field ONLY if:<br>[bup_ed] = '4'                                                                                                                                                                                             | You have indicated bup administration of [firstbup], [secondbup], [thirdbup], [fourthbup]. Is this correct?                                       | yesno, Required<br><table border="1"> <tr><td>1</td><td>Yes</td></tr> <tr><td>0</td><td>No</td></tr> </table> | 1 | Yes | 0 | No |
| 1   | Yes                                                                                                                                                                                                                                                             |                                                                                                                                                   |                                                                                                               |   |     |   |    |
| 0   | No                                                                                                                                                                                                                                                              |                                                                                                                                                   |                                                                                                               |   |     |   |    |
| 148 | <b>buptotalcheck_5</b><br>Show the field ONLY if:<br>[bup_ed] = '5'                                                                                                                                                                                             | You have indicated bup administration of [firstbup], [secondbup], [thirdbup], [fourthbup], [fifthbup]. Is this correct?                           | yesno, Required<br><table border="1"> <tr><td>1</td><td>Yes</td></tr> <tr><td>0</td><td>No</td></tr> </table> | 1 | Yes | 0 | No |
| 1   | Yes                                                                                                                                                                                                                                                             |                                                                                                                                                   |                                                                                                               |   |     |   |    |
| 0   | No                                                                                                                                                                                                                                                              |                                                                                                                                                   |                                                                                                               |   |     |   |    |
| 149 | <b>buptotalcheck_6</b><br>Show the field ONLY if:<br>[bup_ed] = '6'                                                                                                                                                                                             | You have indicated bup administration of [firstbup], [secondbup], [thirdbup], [fourthbup], [fifthbup], [sixthbup]. Is this correct?               | yesno, Required<br><table border="1"> <tr><td>1</td><td>Yes</td></tr> <tr><td>0</td><td>No</td></tr> </table> | 1 | Yes | 0 | No |
| 1   | Yes                                                                                                                                                                                                                                                             |                                                                                                                                                   |                                                                                                               |   |     |   |    |
| 0   | No                                                                                                                                                                                                                                                              |                                                                                                                                                   |                                                                                                               |   |     |   |    |
| 150 | <b>buptotalcheck_7</b><br>Show the field ONLY if:<br>[bup_ed] = '7'                                                                                                                                                                                             | You have indicated bup administration of [firstbup], [secondbup], [thirdbup], [fourthbup], [fifthbup], [sixthbup], [seventhbup]. Is this correct? | yesno, Required<br><table border="1"> <tr><td>1</td><td>Yes</td></tr> <tr><td>0</td><td>No</td></tr> </table> | 1 | Yes | 0 | No |
| 1   | Yes                                                                                                                                                                                                                                                             |                                                                                                                                                   |                                                                                                               |   |     |   |    |
| 0   | No                                                                                                                                                                                                                                                              |                                                                                                                                                   |                                                                                                               |   |     |   |    |
| 151 | <b>buptotalfix</b><br>Show the field ONLY if:<br>[buptotalcheck_1] = '0' or<br>[buptotalcheck_2] = '0'<br>or [buptotalcheck_3] =<br>'0' or [buptotalcheck_4]<br>= '0' or [buptotalcheck_5]<br>= '0' or [buptotalcheck_6]<br>= '0' or [buptotalcheck_7]<br>= '0' | Check chart and fix buprenorphine doses.                                                                                                          | radio                                                                                                         |   |     |   |    |
| 152 | <b>sumbup_sl</b><br>Show the field ONLY if:<br>[bup_ed] = '1' or [bup_ed] =<br>'2' or [bup_ed] = '3'<br>or [bup_ed] = '4' or [bup_ed]<br>= '5' or [bup_ed] =<br>'6' or [bup_ed] = '7'                                                                           | Double check chart and above. Add up the total SL bup administered (mg)<br><i>Add up all SL doses.</i>                                            | text, Required                                                                                                |   |     |   |    |
| 153 | <b>iv_bup</b>                                                                                                                                                                                                                                                   | Did the patient receive IV buprenorphine?                                                                                                         | yesno, Required<br><table border="1"> <tr><td>1</td><td>Yes</td></tr> <tr><td>0</td><td>No</td></tr> </table> | 1 | Yes | 0 | No |
| 1   | Yes                                                                                                                                                                                                                                                             |                                                                                                                                                   |                                                                                                               |   |     |   |    |
| 0   | No                                                                                                                                                                                                                                                              |                                                                                                                                                   |                                                                                                               |   |     |   |    |
| 154 | <b>sumbup_iv</b>                                                                                                                                                                                                                                                | Double check chart and above. Add up the total IV bup administered (mg)<br><i>Add up all IV doses.</i>                                            | text, Required                                                                                                |   |     |   |    |
| 155 | <b>cows_post</b><br>Show the field ONLY if:<br>[bup_ed] = '1' or [bup_ed] =<br>'2' or [bup_ed] = '3'<br>or [bup_ed] = '4' or [bup_ed]<br>= '5' or [bup_ed] =<br>'6' or [bup_ed] = '7'                                                                           | Were any COWS scores recorded after pt received buprenorphine in the ED?                                                                          | radio, Required<br><table border="1"> <tr><td>1</td><td>Yes</td></tr> <tr><td>0</td><td>No</td></tr> </table> | 1 | Yes | 0 | No |
| 1   | Yes                                                                                                                                                                                                                                                             |                                                                                                                                                   |                                                                                                               |   |     |   |    |
| 0   | No                                                                                                                                                                                                                                                              |                                                                                                                                                   |                                                                                                               |   |     |   |    |

|     |                                                                                                                                                                                                            |                                                                                                  |                                                                                                                                                                                                          |   |   |   |   |   |   |   |   |   |   |
|-----|------------------------------------------------------------------------------------------------------------------------------------------------------------------------------------------------------------|--------------------------------------------------------------------------------------------------|----------------------------------------------------------------------------------------------------------------------------------------------------------------------------------------------------------|---|---|---|---|---|---|---|---|---|---|
| 156 | <p><b>cows_post_number</b></p> <p>Show the field ONLY if:<br/>[cows_post] = '1'</p>                                                                                                                        | <p>How many COWS scores were recorded after buprenorphine administration?</p>                    | <p>radio, Required</p> <table border="1"> <tr><td>1</td><td>1</td></tr> <tr><td>2</td><td>2</td></tr> <tr><td>3</td><td>3</td></tr> <tr><td>4</td><td>4</td></tr> <tr><td>5</td><td>5</td></tr> </table> | 1 | 1 | 2 | 2 | 3 | 3 | 4 | 4 | 5 | 5 |
| 1   | 1                                                                                                                                                                                                          |                                                                                                  |                                                                                                                                                                                                          |   |   |   |   |   |   |   |   |   |   |
| 2   | 2                                                                                                                                                                                                          |                                                                                                  |                                                                                                                                                                                                          |   |   |   |   |   |   |   |   |   |   |
| 3   | 3                                                                                                                                                                                                          |                                                                                                  |                                                                                                                                                                                                          |   |   |   |   |   |   |   |   |   |   |
| 4   | 4                                                                                                                                                                                                          |                                                                                                  |                                                                                                                                                                                                          |   |   |   |   |   |   |   |   |   |   |
| 5   | 5                                                                                                                                                                                                          |                                                                                                  |                                                                                                                                                                                                          |   |   |   |   |   |   |   |   |   |   |
| 157 | <p><b>cows_post_1</b></p> <p>Show the field ONLY if:<br/>[cows_post_number] = '1' or [cows_post_number] = '2' or [cows_post_number] = '3' or [cows_post_number] = '4' or [cows_post_number] = '5'</p>      | <p>First COWS score post-buprenorphine.</p>                                                      | <p>text, Required</p>                                                                                                                                                                                    |   |   |   |   |   |   |   |   |   |   |
| 158 | <p><b>cows_post_time_1</b></p> <p>Show the field ONLY if:<br/>[cows_post_number] = '1' or [cows_post_number] = '2' or [cows_post_number] = '3' or [cows_post_number] = '4' or [cows_post_number] = '5'</p> | <p>Date and time of first COWS score post-buprenorphine.<br/><i>Leave blank if unknown.</i></p>  | <p>text (datetime_mdy)</p>                                                                                                                                                                               |   |   |   |   |   |   |   |   |   |   |
| 159 | <p><b>cows_post_2</b></p> <p>Show the field ONLY if:<br/>[cows_post_number] = '2' or [cows_post_number] = '3' or [cows_post_number] = '4' or [cows_post_number] = '5'</p>                                  | <p>Second COWS score post-buprenorphine.</p>                                                     | <p>text, Required</p>                                                                                                                                                                                    |   |   |   |   |   |   |   |   |   |   |
| 160 | <p><b>cows_post_time_2</b></p> <p>Show the field ONLY if:<br/>[cows_post_number] = '2' or [cows_post_number] = '3' or [cows_post_number] = '4' or [cows_post_number] = '5'</p>                             | <p>Date and time of second COWS score post-buprenorphine.<br/><i>Leave blank if unknown.</i></p> | <p>text (datetime_mdy)</p>                                                                                                                                                                               |   |   |   |   |   |   |   |   |   |   |
| 161 | <p><b>cows_post_3</b></p> <p>Show the field ONLY if:<br/>[cows_post_number] = '3' or [cows_post_number] = '4' or [cows_post_number] = '5'</p>                                                              | <p>Third COWS score post-buprenorphine.</p>                                                      | <p>text, Required</p>                                                                                                                                                                                    |   |   |   |   |   |   |   |   |   |   |
| 162 | <p><b>cows_post_time_3</b></p> <p>Show the field ONLY if:<br/>[cows_post_number] = '3' or [cows_post_number] = '4' or [cows_post_number] = '5'</p>                                                         | <p>Date and time of third COWS score post-buprenorphine.<br/><i>Leave blank if unknown.</i></p>  | <p>text (datetime_mdy)</p>                                                                                                                                                                               |   |   |   |   |   |   |   |   |   |   |

|     |                                                                                                                |                                                                                                                                                                                                                                               |                                                                                                                                                                                                                                                                                                                                                                                                          |   |                    |         |          |                    |                                          |     |                    |                                         |   |                    |                   |
|-----|----------------------------------------------------------------------------------------------------------------|-----------------------------------------------------------------------------------------------------------------------------------------------------------------------------------------------------------------------------------------------|----------------------------------------------------------------------------------------------------------------------------------------------------------------------------------------------------------------------------------------------------------------------------------------------------------------------------------------------------------------------------------------------------------|---|--------------------|---------|----------|--------------------|------------------------------------------|-----|--------------------|-----------------------------------------|---|--------------------|-------------------|
| 163 | <b>cows_post_4</b><br><br>Show the field ONLY if:<br>[cows_post_number] = '4' or [cows_post_number] = '5'      | <b>Fourth COWS score post-buprenorphine.</b>                                                                                                                                                                                                  | text, Required                                                                                                                                                                                                                                                                                                                                                                                           |   |                    |         |          |                    |                                          |     |                    |                                         |   |                    |                   |
| 164 | <b>cows_post_time_4</b><br><br>Show the field ONLY if:<br>[cows_post_number] = '4' or [cows_post_number] = '5' | <b>Date and time of fourth COWS score post-buprenorphine.</b><br><i>Leave blank if unknown.</i>                                                                                                                                               | text (datetime_mdy)                                                                                                                                                                                                                                                                                                                                                                                      |   |                    |         |          |                    |                                          |     |                    |                                         |   |                    |                   |
| 165 | <b>cows_post_5</b><br><br>Show the field ONLY if:<br>[cows_post_number] = '5'                                  | <b>Fifth COWS score post-buprenorphine.</b>                                                                                                                                                                                                   | text, Required                                                                                                                                                                                                                                                                                                                                                                                           |   |                    |         |          |                    |                                          |     |                    |                                         |   |                    |                   |
| 166 | <b>cows_post_time_5</b><br><br>Show the field ONLY if:<br>[cows_post_number] = '5'                             | <b>Date and time of fifth COWS score post-buprenorphine.</b><br><i>Leave blank if unknown.</i>                                                                                                                                                | text (datetime_mdy)                                                                                                                                                                                                                                                                                                                                                                                      |   |                    |         |          |                    |                                          |     |                    |                                         |   |                    |                   |
| 167 | <b>post_bup</b>                                                                                                | <b>Compare the clinical impression at presentation with the clinical impression after all buprenorphine administrations. At discharge is the patient's overall clinical status:</b>                                                           | radio, Required<br><table border="1"> <tr> <td>1</td> <td>Unchanged</td> </tr> <tr> <td>2</td> <td>Improved</td> </tr> <tr> <td>3</td> <td>Worse</td> </tr> <tr> <td>999</td> <td>Can't tell</td> </tr> </table>                                                                                                                                                                                         | 1 | Unchanged          | 2       | Improved | 3                  | Worse                                    | 999 | Can't tell         |                                         |   |                    |                   |
| 1   | Unchanged                                                                                                      |                                                                                                                                                                                                                                               |                                                                                                                                                                                                                                                                                                                                                                                                          |   |                    |         |          |                    |                                          |     |                    |                                         |   |                    |                   |
| 2   | Improved                                                                                                       |                                                                                                                                                                                                                                               |                                                                                                                                                                                                                                                                                                                                                                                                          |   |                    |         |          |                    |                                          |     |                    |                                         |   |                    |                   |
| 3   | Worse                                                                                                          |                                                                                                                                                                                                                                               |                                                                                                                                                                                                                                                                                                                                                                                                          |   |                    |         |          |                    |                                          |     |                    |                                         |   |                    |                   |
| 999 | Can't tell                                                                                                     |                                                                                                                                                                                                                                               |                                                                                                                                                                                                                                                                                                                                                                                                          |   |                    |         |          |                    |                                          |     |                    |                                         |   |                    |                   |
| 168 | <b>postbup_ss</b>                                                                                              | <b>Section Header:</b> <i>Post-Bup Signs and Symptoms</i><br><br><b>Were any of the signs or symptom listed above documented within 6 hours after the patient received buprenorphine?</b>                                                     | yesno, Required<br><table border="1"> <tr> <td>1</td> <td>Yes</td> </tr> <tr> <td>0</td> <td>No</td> </tr> </table>                                                                                                                                                                                                                                                                                      | 1 | Yes                | 0       | No       |                    |                                          |     |                    |                                         |   |                    |                   |
| 1   | Yes                                                                                                            |                                                                                                                                                                                                                                               |                                                                                                                                                                                                                                                                                                                                                                                                          |   |                    |         |          |                    |                                          |     |                    |                                         |   |                    |                   |
| 0   | No                                                                                                             |                                                                                                                                                                                                                                               |                                                                                                                                                                                                                                                                                                                                                                                                          |   |                    |         |          |                    |                                          |     |                    |                                         |   |                    |                   |
| 169 | <b>postbup_sedation</b><br><br>Show the field ONLY if:<br>[postbup_ss] = '1'                                   | <b>Section Header:</b> <i>Post-Bup Sedation</i><br><br><b>Please review the entire clinical chart and note if any of the following signs or symptoms of sedation were documented within 6 hours after first buprenorphine administration.</b> | checkbox, Required<br><table border="1"> <tr> <td>1</td> <td>postbup_sedation_1</td> <td>Nodding</td> </tr> <tr> <td>2</td> <td>postbup_sedation_2</td> <td>Sleepy, drowsy, difficulty staying awake</td> </tr> <tr> <td>3</td> <td>postbup_sedation_3</td> <td>Feelings of general fatigue or weakness</td> </tr> <tr> <td>0</td> <td>postbup_sedation_0</td> <td>None of the above</td> </tr> </table> | 1 | postbup_sedation_1 | Nodding | 2        | postbup_sedation_2 | Sleepy, drowsy, difficulty staying awake | 3   | postbup_sedation_3 | Feelings of general fatigue or weakness | 0 | postbup_sedation_0 | None of the above |
| 1   | postbup_sedation_1                                                                                             | Nodding                                                                                                                                                                                                                                       |                                                                                                                                                                                                                                                                                                                                                                                                          |   |                    |         |          |                    |                                          |     |                    |                                         |   |                    |                   |
| 2   | postbup_sedation_2                                                                                             | Sleepy, drowsy, difficulty staying awake                                                                                                                                                                                                      |                                                                                                                                                                                                                                                                                                                                                                                                          |   |                    |         |          |                    |                                          |     |                    |                                         |   |                    |                   |
| 3   | postbup_sedation_3                                                                                             | Feelings of general fatigue or weakness                                                                                                                                                                                                       |                                                                                                                                                                                                                                                                                                                                                                                                          |   |                    |         |          |                    |                                          |     |                    |                                         |   |                    |                   |
| 0   | postbup_sedation_0                                                                                             | None of the above                                                                                                                                                                                                                             |                                                                                                                                                                                                                                                                                                                                                                                                          |   |                    |         |          |                    |                                          |     |                    |                                         |   |                    |                   |
| 170 | <b>nodding_time_yn</b><br><br>Show the field ONLY if:<br>[postbup_sedation(1)] = '1'                           | <b>Did the provider document the time(s) at which nodding was noted?</b>                                                                                                                                                                      | yesno, Required<br><table border="1"> <tr> <td>1</td> <td>Yes</td> </tr> <tr> <td>0</td> <td>No</td> </tr> </table>                                                                                                                                                                                                                                                                                      | 1 | Yes                | 0       | No       |                    |                                          |     |                    |                                         |   |                    |                   |
| 1   | Yes                                                                                                            |                                                                                                                                                                                                                                               |                                                                                                                                                                                                                                                                                                                                                                                                          |   |                    |         |          |                    |                                          |     |                    |                                         |   |                    |                   |
| 0   | No                                                                                                             |                                                                                                                                                                                                                                               |                                                                                                                                                                                                                                                                                                                                                                                                          |   |                    |         |          |                    |                                          |     |                    |                                         |   |                    |                   |

|     |                                                                                                                                                                            |                                                                                                                                                    |                                                                                                                                                                                                                                           |   |     |   |    |   |   |   |   |   |   |   |   |
|-----|----------------------------------------------------------------------------------------------------------------------------------------------------------------------------|----------------------------------------------------------------------------------------------------------------------------------------------------|-------------------------------------------------------------------------------------------------------------------------------------------------------------------------------------------------------------------------------------------|---|-----|---|----|---|---|---|---|---|---|---|---|
| 171 | <b>nodding_num</b><br>Show the field ONLY if:<br>[nodding_time_yn] = '1'                                                                                                   | How many instances of nodding were documented with timestamps within 6 hours after first buprenorphine administration?                             | <b>radio, Required</b><br><table border="1"> <tr><td>0</td><td>0</td></tr> <tr><td>1</td><td>1</td></tr> <tr><td>2</td><td>2</td></tr> <tr><td>3</td><td>3</td></tr> <tr><td>4</td><td>4</td></tr> <tr><td>5</td><td>5</td></tr> </table> | 0 | 0   | 1 | 1  | 2 | 2 | 3 | 3 | 4 | 4 | 5 | 5 |
| 0   | 0                                                                                                                                                                          |                                                                                                                                                    |                                                                                                                                                                                                                                           |   |     |   |    |   |   |   |   |   |   |   |   |
| 1   | 1                                                                                                                                                                          |                                                                                                                                                    |                                                                                                                                                                                                                                           |   |     |   |    |   |   |   |   |   |   |   |   |
| 2   | 2                                                                                                                                                                          |                                                                                                                                                    |                                                                                                                                                                                                                                           |   |     |   |    |   |   |   |   |   |   |   |   |
| 3   | 3                                                                                                                                                                          |                                                                                                                                                    |                                                                                                                                                                                                                                           |   |     |   |    |   |   |   |   |   |   |   |   |
| 4   | 4                                                                                                                                                                          |                                                                                                                                                    |                                                                                                                                                                                                                                           |   |     |   |    |   |   |   |   |   |   |   |   |
| 5   | 5                                                                                                                                                                          |                                                                                                                                                    |                                                                                                                                                                                                                                           |   |     |   |    |   |   |   |   |   |   |   |   |
| 172 | <b>nod_time1</b><br>Show the field ONLY if:<br>[nodding_num] = '1' or<br>[nodding_num] = '2' or<br>[nodding_num] = '3' or<br>[nodding_num] = '4' or<br>[nodding_num] = '5' | Record the date and time of the first instance of nodding                                                                                          | <b>text (datetime_mdy), Required</b>                                                                                                                                                                                                      |   |     |   |    |   |   |   |   |   |   |   |   |
| 173 | <b>nod_time2</b><br>Show the field ONLY if:<br>[nodding_num] = '2' or<br>[nodding_num] = '3' or<br>[nodding_num] = '4' or<br>[nodding_num] = '5'                           | Record the date and time of the second instance of nodding                                                                                         | <b>text (datetime_mdy), Required</b>                                                                                                                                                                                                      |   |     |   |    |   |   |   |   |   |   |   |   |
| 174 | <b>nod_time3</b><br>Show the field ONLY if:<br>[nodding_num] = '3' or<br>[nodding_num] = '4' or<br>[nodding_num] = '5'                                                     | Record the date and time of the third instance of nodding                                                                                          | <b>text (datetime_mdy), Required</b>                                                                                                                                                                                                      |   |     |   |    |   |   |   |   |   |   |   |   |
| 175 | <b>nod_time4</b><br>Show the field ONLY if:<br>[nodding_num] = '4' or<br>[nodding_num] = '5'                                                                               | Record the date and time of the fourth instance of nodding                                                                                         | <b>text (datetime_mdy), Required</b>                                                                                                                                                                                                      |   |     |   |    |   |   |   |   |   |   |   |   |
| 176 | <b>nod_time5</b><br>Show the field ONLY if:<br>[nodding_num] = '5'                                                                                                         | Record the date and time of the fifth instance of nodding                                                                                          | <b>text (datetime_mdy), Required</b>                                                                                                                                                                                                      |   |     |   |    |   |   |   |   |   |   |   |   |
| 177 | <b>sleepy_time_yn</b><br>Show the field ONLY if:<br>[postbup_sedation(2)] = '1'                                                                                            | Did the provider document the time(s) at which sleepiness, drowsiness, or difficulty staying awake were noted?                                     | <b>yesno, Required</b><br><table border="1"> <tr><td>1</td><td>Yes</td></tr> <tr><td>0</td><td>No</td></tr> </table>                                                                                                                      | 1 | Yes | 0 | No |   |   |   |   |   |   |   |   |
| 1   | Yes                                                                                                                                                                        |                                                                                                                                                    |                                                                                                                                                                                                                                           |   |     |   |    |   |   |   |   |   |   |   |   |
| 0   | No                                                                                                                                                                         |                                                                                                                                                    |                                                                                                                                                                                                                                           |   |     |   |    |   |   |   |   |   |   |   |   |
| 178 | <b>sleepy_num</b><br>Show the field ONLY if:<br>[sleepy_time_yn] = '1'                                                                                                     | How many instances of sleepiness, drowsiness, or difficulty staying awake were documented within 6 hours after first buprenorphine administration? | <b>radio, Required</b><br><table border="1"> <tr><td>0</td><td>0</td></tr> <tr><td>1</td><td>1</td></tr> <tr><td>2</td><td>2</td></tr> <tr><td>3</td><td>3</td></tr> <tr><td>4</td><td>4</td></tr> <tr><td>5</td><td>5</td></tr> </table> | 0 | 0   | 1 | 1  | 2 | 2 | 3 | 3 | 4 | 4 | 5 | 5 |
| 0   | 0                                                                                                                                                                          |                                                                                                                                                    |                                                                                                                                                                                                                                           |   |     |   |    |   |   |   |   |   |   |   |   |
| 1   | 1                                                                                                                                                                          |                                                                                                                                                    |                                                                                                                                                                                                                                           |   |     |   |    |   |   |   |   |   |   |   |   |
| 2   | 2                                                                                                                                                                          |                                                                                                                                                    |                                                                                                                                                                                                                                           |   |     |   |    |   |   |   |   |   |   |   |   |
| 3   | 3                                                                                                                                                                          |                                                                                                                                                    |                                                                                                                                                                                                                                           |   |     |   |    |   |   |   |   |   |   |   |   |
| 4   | 4                                                                                                                                                                          |                                                                                                                                                    |                                                                                                                                                                                                                                           |   |     |   |    |   |   |   |   |   |   |   |   |
| 5   | 5                                                                                                                                                                          |                                                                                                                                                    |                                                                                                                                                                                                                                           |   |     |   |    |   |   |   |   |   |   |   |   |

|     |                                                                                                                                                                           |                                                                                                                                                        |                                                                                                                                                                                                                                                             |   |     |   |    |   |   |   |   |   |   |   |   |
|-----|---------------------------------------------------------------------------------------------------------------------------------------------------------------------------|--------------------------------------------------------------------------------------------------------------------------------------------------------|-------------------------------------------------------------------------------------------------------------------------------------------------------------------------------------------------------------------------------------------------------------|---|-----|---|----|---|---|---|---|---|---|---|---|
| 179 | <b>sleepy_time1</b><br><b>Show the field ONLY if:</b><br>[sleepy_num] = '1' or [sleepy_num] = '2' or [sleepy_num] = '3' or [sleepy_num] = '4' or [sleepy_num] = '5'       | Record the date and time of the first instance of sleepiness, drowsiness, or difficulty staying awake.                                                 | text (datetime_mdy), Required                                                                                                                                                                                                                               |   |     |   |    |   |   |   |   |   |   |   |   |
| 180 | <b>sleepy_time2</b><br><b>Show the field ONLY if:</b><br>[sleepy_num] = '2' or [sleepy_num] = '3' or [sleepy_num] = '4' or [sleepy_num] = '5'                             | Record the date and time of the second instance of sleepiness, drowsiness, or difficulty staying awake.                                                | text (datetime_mdy), Required                                                                                                                                                                                                                               |   |     |   |    |   |   |   |   |   |   |   |   |
| 181 | <b>sleepy_time3</b><br><b>Show the field ONLY if:</b><br>[sleepy_num] = '3' or [sleepy_num] = '4' or [sleepy_num] = '5'                                                   | Record the date time of the third instance of sleepiness, drowsiness, or difficulty staying awake.                                                     | text (datetime_mdy), Required                                                                                                                                                                                                                               |   |     |   |    |   |   |   |   |   |   |   |   |
| 182 | <b>sleepy_time4</b><br><b>Show the field ONLY if:</b><br>[sleepy_num] = '4' or [sleepy_num] = '5'                                                                         | Record the date and time of the fourth instance of sleepiness, drowsiness, or difficulty staying awake.                                                | text (datetime_mdy), Required                                                                                                                                                                                                                               |   |     |   |    |   |   |   |   |   |   |   |   |
| 183 | <b>sleepy_time5</b><br><b>Show the field ONLY if:</b><br>[sleepy_num] = '5'                                                                                               | Record the date and time of the fifth instance of sleepiness, drowsiness, or difficulty staying awake.                                                 | text (datetime_mdy), Required                                                                                                                                                                                                                               |   |     |   |    |   |   |   |   |   |   |   |   |
| 184 | <b>fatigue_time_yn</b><br><b>Show the field ONLY if:</b><br>[postbup_sedation(3)] = '1'                                                                                   | Did the provider document the time(s) at which general fatigue or feelings of weakness were noted?                                                     | <b>yesno, Required</b><br><table border="1"> <tr> <td>1</td> <td>Yes</td> </tr> <tr> <td>0</td> <td>No</td> </tr> </table>                                                                                                                                  | 1 | Yes | 0 | No |   |   |   |   |   |   |   |   |
| 1   | Yes                                                                                                                                                                       |                                                                                                                                                        |                                                                                                                                                                                                                                                             |   |     |   |    |   |   |   |   |   |   |   |   |
| 0   | No                                                                                                                                                                        |                                                                                                                                                        |                                                                                                                                                                                                                                                             |   |     |   |    |   |   |   |   |   |   |   |   |
| 185 | <b>fatigue_num</b><br><b>Show the field ONLY if:</b><br>[fatigue_time_yn] = '1'                                                                                           | How many instances of general fatigue or feelings of weakness were documented with timestamps within 6 hours after first buprenorphine administration? | <b>radio, Required</b><br><table border="1"> <tr> <td>0</td> <td>0</td> </tr> <tr> <td>1</td> <td>1</td> </tr> <tr> <td>2</td> <td>2</td> </tr> <tr> <td>3</td> <td>3</td> </tr> <tr> <td>4</td> <td>4</td> </tr> <tr> <td>5</td> <td>5</td> </tr> </table> | 0 | 0   | 1 | 1  | 2 | 2 | 3 | 3 | 4 | 4 | 5 | 5 |
| 0   | 0                                                                                                                                                                         |                                                                                                                                                        |                                                                                                                                                                                                                                                             |   |     |   |    |   |   |   |   |   |   |   |   |
| 1   | 1                                                                                                                                                                         |                                                                                                                                                        |                                                                                                                                                                                                                                                             |   |     |   |    |   |   |   |   |   |   |   |   |
| 2   | 2                                                                                                                                                                         |                                                                                                                                                        |                                                                                                                                                                                                                                                             |   |     |   |    |   |   |   |   |   |   |   |   |
| 3   | 3                                                                                                                                                                         |                                                                                                                                                        |                                                                                                                                                                                                                                                             |   |     |   |    |   |   |   |   |   |   |   |   |
| 4   | 4                                                                                                                                                                         |                                                                                                                                                        |                                                                                                                                                                                                                                                             |   |     |   |    |   |   |   |   |   |   |   |   |
| 5   | 5                                                                                                                                                                         |                                                                                                                                                        |                                                                                                                                                                                                                                                             |   |     |   |    |   |   |   |   |   |   |   |   |
| 186 | <b>fatigue_time1</b><br><b>Show the field ONLY if:</b><br>[fatigue_num] = '1' or [fatigue_num] = '2' or [fatigue_num] = '3' or [fatigue_num] = '4' or [fatigue_num] = '5' | Record the date and time of the first instance of general fatigue or weakness.                                                                         | text (datetime_mdy), Required                                                                                                                                                                                                                               |   |     |   |    |   |   |   |   |   |   |   |   |

|     |                                                                                                                                     |                                                                                                                                                                                                                                            |                                                                                                                                                                                                                                                                                                                                                                                                                                                                                                                                                                                                                                                                                                                                                                                                                                                                                                                                                                                                                                                                                               |   |                 |           |    |                 |                       |   |                 |               |   |                 |                |   |                 |      |   |                 |         |   |                 |                     |   |                 |      |   |                 |          |    |                  |         |    |                  |                          |    |                  |                              |    |                  |                  |   |                 |                   |
|-----|-------------------------------------------------------------------------------------------------------------------------------------|--------------------------------------------------------------------------------------------------------------------------------------------------------------------------------------------------------------------------------------------|-----------------------------------------------------------------------------------------------------------------------------------------------------------------------------------------------------------------------------------------------------------------------------------------------------------------------------------------------------------------------------------------------------------------------------------------------------------------------------------------------------------------------------------------------------------------------------------------------------------------------------------------------------------------------------------------------------------------------------------------------------------------------------------------------------------------------------------------------------------------------------------------------------------------------------------------------------------------------------------------------------------------------------------------------------------------------------------------------|---|-----------------|-----------|----|-----------------|-----------------------|---|-----------------|---------------|---|-----------------|----------------|---|-----------------|------|---|-----------------|---------|---|-----------------|---------------------|---|-----------------|------|---|-----------------|----------|----|------------------|---------|----|------------------|--------------------------|----|------------------|------------------------------|----|------------------|------------------|---|-----------------|-------------------|
| 187 | <b>fatigue_time2</b><br>Show the field ONLY if:<br>[fatigue_num]='2' or [fatigue_num]='3' or [fatigue_num]='4' or [fatigue_num]='5' | Record the date and time of the second instance of general fatigue or weakness.                                                                                                                                                            | text (datetime_mdy), Required                                                                                                                                                                                                                                                                                                                                                                                                                                                                                                                                                                                                                                                                                                                                                                                                                                                                                                                                                                                                                                                                 |   |                 |           |    |                 |                       |   |                 |               |   |                 |                |   |                 |      |   |                 |         |   |                 |                     |   |                 |      |   |                 |          |    |                  |         |    |                  |                          |    |                  |                              |    |                  |                  |   |                 |                   |
| 188 | <b>fatigue_time3</b><br>Show the field ONLY if:<br>[fatigue_num]='3' or [fatigue_num]='4' or [fatigue_num]='5'                      | Record the date and time of the third instance of general fatigue or weakness.                                                                                                                                                             | text (datetime_mdy), Required                                                                                                                                                                                                                                                                                                                                                                                                                                                                                                                                                                                                                                                                                                                                                                                                                                                                                                                                                                                                                                                                 |   |                 |           |    |                 |                       |   |                 |               |   |                 |                |   |                 |      |   |                 |         |   |                 |                     |   |                 |      |   |                 |          |    |                  |         |    |                  |                          |    |                  |                              |    |                  |                  |   |                 |                   |
| 189 | <b>fatigue_time4</b><br>Show the field ONLY if:<br>[fatigue_num]='4' or [fatigue_num]='5'                                           | Record the date and time of the fourth instance of general fatigue or weakness.                                                                                                                                                            | text (datetime_mdy), Required                                                                                                                                                                                                                                                                                                                                                                                                                                                                                                                                                                                                                                                                                                                                                                                                                                                                                                                                                                                                                                                                 |   |                 |           |    |                 |                       |   |                 |               |   |                 |                |   |                 |      |   |                 |         |   |                 |                     |   |                 |      |   |                 |          |    |                  |         |    |                  |                          |    |                  |                              |    |                  |                  |   |                 |                   |
| 190 | <b>fatigue_time5</b><br>Show the field ONLY if:<br>[fatigue_num]='5'                                                                | Record the date and time of the fifth instance of general fatigue or weakness.                                                                                                                                                             | text (datetime_mdy), Required                                                                                                                                                                                                                                                                                                                                                                                                                                                                                                                                                                                                                                                                                                                                                                                                                                                                                                                                                                                                                                                                 |   |                 |           |    |                 |                       |   |                 |               |   |                 |                |   |                 |      |   |                 |         |   |                 |                     |   |                 |      |   |                 |          |    |                  |         |    |                  |                          |    |                  |                              |    |                  |                  |   |                 |                   |
| 191 | <b>postbup_intox</b><br>Show the field ONLY if:<br>[postbup_ss]='1'                                                                 | <b>Section Header: <i>Post-Bup Intoxication</i></b><br>Please review the entire clinical chart and note if any of the following signs or symptoms of intoxication were documented within 6 hours after first buprenorphine administration. | <b>checkbox, Required</b><br><table border="1"> <tr> <td>1</td> <td>postbup_intox_1</td> <td>Good mood</td> </tr> <tr> <td>2</td> <td>postbup_intox_2</td> <td>Coasting (Spaced out)</td> </tr> <tr> <td>3</td> <td>postbup_intox_3</td> <td>Pleasant Sick</td> </tr> <tr> <td>4</td> <td>postbup_intox_4</td> <td>Drive (energy)</td> </tr> <tr> <td>5</td> <td>postbup_intox_5</td> <td>High</td> </tr> <tr> <td>6</td> <td>postbup_intox_6</td> <td>Drunken</td> </tr> <tr> <td>7</td> <td>postbup_intox_7</td> <td>Soapbox (talkative)</td> </tr> <tr> <td>8</td> <td>postbup_intox_8</td> <td>Rush</td> </tr> <tr> <td>9</td> <td>postbup_intox_9</td> <td>Friendly</td> </tr> <tr> <td>10</td> <td>postbup_intox_10</td> <td>Relaxed</td> </tr> <tr> <td>11</td> <td>postbup_intox_11</td> <td>Difficulty concentrating</td> </tr> <tr> <td>12</td> <td>postbup_intox_12</td> <td>Feeling lightheaded or dizzy</td> </tr> <tr> <td>13</td> <td>postbup_intox_13</td> <td>Feeling confused</td> </tr> <tr> <td>0</td> <td>postbup_intox_0</td> <td>None of the above</td> </tr> </table> | 1 | postbup_intox_1 | Good mood | 2  | postbup_intox_2 | Coasting (Spaced out) | 3 | postbup_intox_3 | Pleasant Sick | 4 | postbup_intox_4 | Drive (energy) | 5 | postbup_intox_5 | High | 6 | postbup_intox_6 | Drunken | 7 | postbup_intox_7 | Soapbox (talkative) | 8 | postbup_intox_8 | Rush | 9 | postbup_intox_9 | Friendly | 10 | postbup_intox_10 | Relaxed | 11 | postbup_intox_11 | Difficulty concentrating | 12 | postbup_intox_12 | Feeling lightheaded or dizzy | 13 | postbup_intox_13 | Feeling confused | 0 | postbup_intox_0 | None of the above |
| 1   | postbup_intox_1                                                                                                                     | Good mood                                                                                                                                                                                                                                  |                                                                                                                                                                                                                                                                                                                                                                                                                                                                                                                                                                                                                                                                                                                                                                                                                                                                                                                                                                                                                                                                                               |   |                 |           |    |                 |                       |   |                 |               |   |                 |                |   |                 |      |   |                 |         |   |                 |                     |   |                 |      |   |                 |          |    |                  |         |    |                  |                          |    |                  |                              |    |                  |                  |   |                 |                   |
| 2   | postbup_intox_2                                                                                                                     | Coasting (Spaced out)                                                                                                                                                                                                                      |                                                                                                                                                                                                                                                                                                                                                                                                                                                                                                                                                                                                                                                                                                                                                                                                                                                                                                                                                                                                                                                                                               |   |                 |           |    |                 |                       |   |                 |               |   |                 |                |   |                 |      |   |                 |         |   |                 |                     |   |                 |      |   |                 |          |    |                  |         |    |                  |                          |    |                  |                              |    |                  |                  |   |                 |                   |
| 3   | postbup_intox_3                                                                                                                     | Pleasant Sick                                                                                                                                                                                                                              |                                                                                                                                                                                                                                                                                                                                                                                                                                                                                                                                                                                                                                                                                                                                                                                                                                                                                                                                                                                                                                                                                               |   |                 |           |    |                 |                       |   |                 |               |   |                 |                |   |                 |      |   |                 |         |   |                 |                     |   |                 |      |   |                 |          |    |                  |         |    |                  |                          |    |                  |                              |    |                  |                  |   |                 |                   |
| 4   | postbup_intox_4                                                                                                                     | Drive (energy)                                                                                                                                                                                                                             |                                                                                                                                                                                                                                                                                                                                                                                                                                                                                                                                                                                                                                                                                                                                                                                                                                                                                                                                                                                                                                                                                               |   |                 |           |    |                 |                       |   |                 |               |   |                 |                |   |                 |      |   |                 |         |   |                 |                     |   |                 |      |   |                 |          |    |                  |         |    |                  |                          |    |                  |                              |    |                  |                  |   |                 |                   |
| 5   | postbup_intox_5                                                                                                                     | High                                                                                                                                                                                                                                       |                                                                                                                                                                                                                                                                                                                                                                                                                                                                                                                                                                                                                                                                                                                                                                                                                                                                                                                                                                                                                                                                                               |   |                 |           |    |                 |                       |   |                 |               |   |                 |                |   |                 |      |   |                 |         |   |                 |                     |   |                 |      |   |                 |          |    |                  |         |    |                  |                          |    |                  |                              |    |                  |                  |   |                 |                   |
| 6   | postbup_intox_6                                                                                                                     | Drunken                                                                                                                                                                                                                                    |                                                                                                                                                                                                                                                                                                                                                                                                                                                                                                                                                                                                                                                                                                                                                                                                                                                                                                                                                                                                                                                                                               |   |                 |           |    |                 |                       |   |                 |               |   |                 |                |   |                 |      |   |                 |         |   |                 |                     |   |                 |      |   |                 |          |    |                  |         |    |                  |                          |    |                  |                              |    |                  |                  |   |                 |                   |
| 7   | postbup_intox_7                                                                                                                     | Soapbox (talkative)                                                                                                                                                                                                                        |                                                                                                                                                                                                                                                                                                                                                                                                                                                                                                                                                                                                                                                                                                                                                                                                                                                                                                                                                                                                                                                                                               |   |                 |           |    |                 |                       |   |                 |               |   |                 |                |   |                 |      |   |                 |         |   |                 |                     |   |                 |      |   |                 |          |    |                  |         |    |                  |                          |    |                  |                              |    |                  |                  |   |                 |                   |
| 8   | postbup_intox_8                                                                                                                     | Rush                                                                                                                                                                                                                                       |                                                                                                                                                                                                                                                                                                                                                                                                                                                                                                                                                                                                                                                                                                                                                                                                                                                                                                                                                                                                                                                                                               |   |                 |           |    |                 |                       |   |                 |               |   |                 |                |   |                 |      |   |                 |         |   |                 |                     |   |                 |      |   |                 |          |    |                  |         |    |                  |                          |    |                  |                              |    |                  |                  |   |                 |                   |
| 9   | postbup_intox_9                                                                                                                     | Friendly                                                                                                                                                                                                                                   |                                                                                                                                                                                                                                                                                                                                                                                                                                                                                                                                                                                                                                                                                                                                                                                                                                                                                                                                                                                                                                                                                               |   |                 |           |    |                 |                       |   |                 |               |   |                 |                |   |                 |      |   |                 |         |   |                 |                     |   |                 |      |   |                 |          |    |                  |         |    |                  |                          |    |                  |                              |    |                  |                  |   |                 |                   |
| 10  | postbup_intox_10                                                                                                                    | Relaxed                                                                                                                                                                                                                                    |                                                                                                                                                                                                                                                                                                                                                                                                                                                                                                                                                                                                                                                                                                                                                                                                                                                                                                                                                                                                                                                                                               |   |                 |           |    |                 |                       |   |                 |               |   |                 |                |   |                 |      |   |                 |         |   |                 |                     |   |                 |      |   |                 |          |    |                  |         |    |                  |                          |    |                  |                              |    |                  |                  |   |                 |                   |
| 11  | postbup_intox_11                                                                                                                    | Difficulty concentrating                                                                                                                                                                                                                   |                                                                                                                                                                                                                                                                                                                                                                                                                                                                                                                                                                                                                                                                                                                                                                                                                                                                                                                                                                                                                                                                                               |   |                 |           |    |                 |                       |   |                 |               |   |                 |                |   |                 |      |   |                 |         |   |                 |                     |   |                 |      |   |                 |          |    |                  |         |    |                  |                          |    |                  |                              |    |                  |                  |   |                 |                   |
| 12  | postbup_intox_12                                                                                                                    | Feeling lightheaded or dizzy                                                                                                                                                                                                               |                                                                                                                                                                                                                                                                                                                                                                                                                                                                                                                                                                                                                                                                                                                                                                                                                                                                                                                                                                                                                                                                                               |   |                 |           |    |                 |                       |   |                 |               |   |                 |                |   |                 |      |   |                 |         |   |                 |                     |   |                 |      |   |                 |          |    |                  |         |    |                  |                          |    |                  |                              |    |                  |                  |   |                 |                   |
| 13  | postbup_intox_13                                                                                                                    | Feeling confused                                                                                                                                                                                                                           |                                                                                                                                                                                                                                                                                                                                                                                                                                                                                                                                                                                                                                                                                                                                                                                                                                                                                                                                                                                                                                                                                               |   |                 |           |    |                 |                       |   |                 |               |   |                 |                |   |                 |      |   |                 |         |   |                 |                     |   |                 |      |   |                 |          |    |                  |         |    |                  |                          |    |                  |                              |    |                  |                  |   |                 |                   |
| 0   | postbup_intox_0                                                                                                                     | None of the above                                                                                                                                                                                                                          |                                                                                                                                                                                                                                                                                                                                                                                                                                                                                                                                                                                                                                                                                                                                                                                                                                                                                                                                                                                                                                                                                               |   |                 |           |    |                 |                       |   |                 |               |   |                 |                |   |                 |      |   |                 |         |   |                 |                     |   |                 |      |   |                 |          |    |                  |         |    |                  |                          |    |                  |                              |    |                  |                  |   |                 |                   |
| 192 | <b>mood_time_yn</b><br>Show the field ONLY if:<br>[postbup_intox(1)]= '1'                                                           | Did the provider document the time(s) at which good mood was noted?                                                                                                                                                                        | <b>yesno, Required</b><br><table border="1"> <tr> <td>1</td> <td>Yes</td> </tr> <tr> <td>0</td> <td>No</td> </tr> </table>                                                                                                                                                                                                                                                                                                                                                                                                                                                                                                                                                                                                                                                                                                                                                                                                                                                                                                                                                                    | 1 | Yes             | 0         | No |                 |                       |   |                 |               |   |                 |                |   |                 |      |   |                 |         |   |                 |                     |   |                 |      |   |                 |          |    |                  |         |    |                  |                          |    |                  |                              |    |                  |                  |   |                 |                   |
| 1   | Yes                                                                                                                                 |                                                                                                                                                                                                                                            |                                                                                                                                                                                                                                                                                                                                                                                                                                                                                                                                                                                                                                                                                                                                                                                                                                                                                                                                                                                                                                                                                               |   |                 |           |    |                 |                       |   |                 |               |   |                 |                |   |                 |      |   |                 |         |   |                 |                     |   |                 |      |   |                 |          |    |                  |         |    |                  |                          |    |                  |                              |    |                  |                  |   |                 |                   |
| 0   | No                                                                                                                                  |                                                                                                                                                                                                                                            |                                                                                                                                                                                                                                                                                                                                                                                                                                                                                                                                                                                                                                                                                                                                                                                                                                                                                                                                                                                                                                                                                               |   |                 |           |    |                 |                       |   |                 |               |   |                 |                |   |                 |      |   |                 |         |   |                 |                     |   |                 |      |   |                 |          |    |                  |         |    |                  |                          |    |                  |                              |    |                  |                  |   |                 |                   |

|     |                                                                                                                                        |                                                                                                                          |                                                                                                                                                                                                                                           |   |     |   |    |   |   |   |   |   |   |   |   |
|-----|----------------------------------------------------------------------------------------------------------------------------------------|--------------------------------------------------------------------------------------------------------------------------|-------------------------------------------------------------------------------------------------------------------------------------------------------------------------------------------------------------------------------------------|---|-----|---|----|---|---|---|---|---|---|---|---|
| 193 | <b>mood_num</b><br>Show the field ONLY if:<br>[mood_time_yn] = '1'                                                                     | How many instances of good mood were documented with timestamps within 6 hours after first buprenorphine administration? | <b>radio, Required</b><br><table border="1"> <tr><td>0</td><td>0</td></tr> <tr><td>1</td><td>1</td></tr> <tr><td>2</td><td>2</td></tr> <tr><td>3</td><td>3</td></tr> <tr><td>4</td><td>4</td></tr> <tr><td>5</td><td>5</td></tr> </table> | 0 | 0   | 1 | 1  | 2 | 2 | 3 | 3 | 4 | 4 | 5 | 5 |
| 0   | 0                                                                                                                                      |                                                                                                                          |                                                                                                                                                                                                                                           |   |     |   |    |   |   |   |   |   |   |   |   |
| 1   | 1                                                                                                                                      |                                                                                                                          |                                                                                                                                                                                                                                           |   |     |   |    |   |   |   |   |   |   |   |   |
| 2   | 2                                                                                                                                      |                                                                                                                          |                                                                                                                                                                                                                                           |   |     |   |    |   |   |   |   |   |   |   |   |
| 3   | 3                                                                                                                                      |                                                                                                                          |                                                                                                                                                                                                                                           |   |     |   |    |   |   |   |   |   |   |   |   |
| 4   | 4                                                                                                                                      |                                                                                                                          |                                                                                                                                                                                                                                           |   |     |   |    |   |   |   |   |   |   |   |   |
| 5   | 5                                                                                                                                      |                                                                                                                          |                                                                                                                                                                                                                                           |   |     |   |    |   |   |   |   |   |   |   |   |
| 194 | <b>mood_time1</b><br>Show the field ONLY if:<br>[mood_num]='1' or [mood_num]='2' or [mood_num]='3' or [mood_num]='4' or [mood_num]='5' | Record the date and time of the first instance of good mood.                                                             | <b>text (datetime_mdy), Required</b>                                                                                                                                                                                                      |   |     |   |    |   |   |   |   |   |   |   |   |
| 195 | <b>mood_time2</b><br>Show the field ONLY if:<br>[mood_num]='2' or [mood_num]='3' or [mood_num]='4' or [mood_num]='5'                   | Record the date and time of the second instance of good mood.                                                            | <b>text (datetime_mdy), Required</b>                                                                                                                                                                                                      |   |     |   |    |   |   |   |   |   |   |   |   |
| 196 | <b>mood_time3</b><br>Show the field ONLY if:<br>[mood_num]='3' or [mood_num]='4' or [mood_num]='5'                                     | Record the date and time of third instance of good mood.                                                                 | <b>text (datetime_mdy), Required</b>                                                                                                                                                                                                      |   |     |   |    |   |   |   |   |   |   |   |   |
| 197 | <b>mood_time4</b><br>Show the field ONLY if:<br>[mood_num]='4' or [mood_num]='5'                                                       | Record the date and time of fourth instance of good mood.                                                                | <b>text (datetime_mdy), Required</b>                                                                                                                                                                                                      |   |     |   |    |   |   |   |   |   |   |   |   |
| 198 | <b>mood_time5</b><br>Show the field ONLY if:<br>[mood_num]='5'                                                                         | Record the date and time of fifth instance of good mood.                                                                 | <b>text (datetime_mdy), Required</b>                                                                                                                                                                                                      |   |     |   |    |   |   |   |   |   |   |   |   |
| 199 | <b>coasting_time_yn</b><br>Show the field ONLY if:<br>[postbup_intox(2)]= '1'                                                          | Did the provider document the time(s) at which coasting was noted?                                                       | <b>yesno, Required</b><br><table border="1"> <tr><td>1</td><td>Yes</td></tr> <tr><td>0</td><td>No</td></tr> </table>                                                                                                                      | 1 | Yes | 0 | No |   |   |   |   |   |   |   |   |
| 1   | Yes                                                                                                                                    |                                                                                                                          |                                                                                                                                                                                                                                           |   |     |   |    |   |   |   |   |   |   |   |   |
| 0   | No                                                                                                                                     |                                                                                                                          |                                                                                                                                                                                                                                           |   |     |   |    |   |   |   |   |   |   |   |   |
| 200 | <b>coasting_num</b><br>Show the field ONLY if:<br>[coasting_time_yn] = '1'                                                             | How many instances of coasting were documented with timestamps within 6 hours after first buprenorphine administration?  | <b>radio, Required</b><br><table border="1"> <tr><td>0</td><td>0</td></tr> <tr><td>1</td><td>1</td></tr> <tr><td>2</td><td>2</td></tr> <tr><td>3</td><td>3</td></tr> <tr><td>4</td><td>4</td></tr> <tr><td>5</td><td>5</td></tr> </table> | 0 | 0   | 1 | 1  | 2 | 2 | 3 | 3 | 4 | 4 | 5 | 5 |
| 0   | 0                                                                                                                                      |                                                                                                                          |                                                                                                                                                                                                                                           |   |     |   |    |   |   |   |   |   |   |   |   |
| 1   | 1                                                                                                                                      |                                                                                                                          |                                                                                                                                                                                                                                           |   |     |   |    |   |   |   |   |   |   |   |   |
| 2   | 2                                                                                                                                      |                                                                                                                          |                                                                                                                                                                                                                                           |   |     |   |    |   |   |   |   |   |   |   |   |
| 3   | 3                                                                                                                                      |                                                                                                                          |                                                                                                                                                                                                                                           |   |     |   |    |   |   |   |   |   |   |   |   |
| 4   | 4                                                                                                                                      |                                                                                                                          |                                                                                                                                                                                                                                           |   |     |   |    |   |   |   |   |   |   |   |   |
| 5   | 5                                                                                                                                      |                                                                                                                          |                                                                                                                                                                                                                                           |   |     |   |    |   |   |   |   |   |   |   |   |

|     |                                                                                                                                                                                      |                                                                                                                                  |                                                                                                                                                                                                                                                             |   |     |   |    |   |   |   |   |   |   |   |   |
|-----|--------------------------------------------------------------------------------------------------------------------------------------------------------------------------------------|----------------------------------------------------------------------------------------------------------------------------------|-------------------------------------------------------------------------------------------------------------------------------------------------------------------------------------------------------------------------------------------------------------|---|-----|---|----|---|---|---|---|---|---|---|---|
| 201 | <b>coasting_time1</b><br>Show the field ONLY if:<br>[coasting_num] = '1' or<br>[coasting_num] = '2' or<br>[coasting_num] = '3' or<br>[coasting_num] = '4' or<br>[coasting_num] = '5' | Record the date and time of the first instance of coasting.                                                                      | text (datetime_mdy), Required                                                                                                                                                                                                                               |   |     |   |    |   |   |   |   |   |   |   |   |
| 202 | <b>coasting_time2</b><br>Show the field ONLY if:<br>[coasting_num] = '2' or<br>[coasting_num] = '3' or<br>[coasting_num] = '4' or<br>[coasting_num] = '5'                            | Record the date and time of the second instance of coasting.                                                                     | text (datetime_mdy), Required                                                                                                                                                                                                                               |   |     |   |    |   |   |   |   |   |   |   |   |
| 203 | <b>coasting_time3</b><br>Show the field ONLY if:<br>[coasting_num] = '3' or<br>[coasting_num] = '4' or<br>[coasting_num] = '5'                                                       | Record the date and time of the third instance of coasting.                                                                      | text (datetime_mdy), Required                                                                                                                                                                                                                               |   |     |   |    |   |   |   |   |   |   |   |   |
| 204 | <b>coasting_time4</b><br>Show the field ONLY if:<br>[coasting_num] = '4' or<br>[coasting_num] = '5'                                                                                  | Record the date and time of the fourth instance of coasting.                                                                     | text (datetime_mdy), Required                                                                                                                                                                                                                               |   |     |   |    |   |   |   |   |   |   |   |   |
| 205 | <b>coasting_time5</b><br>Show the field ONLY if:<br>[coasting_num] = '5'                                                                                                             | Record the date and time of the fifth instance of coasting.                                                                      | text (datetime_mdy), Required                                                                                                                                                                                                                               |   |     |   |    |   |   |   |   |   |   |   |   |
| 206 | <b>pleasant_time_yn</b><br>Show the field ONLY if:<br>[postbup_intox(3)]='1'                                                                                                         | Did the provider document the time(s) at which pleasant sickness was noted?                                                      | <b>yesno, Required</b><br><table border="1"> <tr> <td>1</td> <td>Yes</td> </tr> <tr> <td>0</td> <td>No</td> </tr> </table>                                                                                                                                  | 1 | Yes | 0 | No |   |   |   |   |   |   |   |   |
| 1   | Yes                                                                                                                                                                                  |                                                                                                                                  |                                                                                                                                                                                                                                                             |   |     |   |    |   |   |   |   |   |   |   |   |
| 0   | No                                                                                                                                                                                   |                                                                                                                                  |                                                                                                                                                                                                                                                             |   |     |   |    |   |   |   |   |   |   |   |   |
| 207 | <b>pleasant_num</b><br>Show the field ONLY if:<br>[pleasant_time_yn] = '1'                                                                                                           | How many instances of pleasant sickness were documented with timestamps within 6 hours after first buprenorphine administration? | <b>radio, Required</b><br><table border="1"> <tr> <td>0</td> <td>0</td> </tr> <tr> <td>1</td> <td>1</td> </tr> <tr> <td>2</td> <td>2</td> </tr> <tr> <td>3</td> <td>3</td> </tr> <tr> <td>4</td> <td>4</td> </tr> <tr> <td>5</td> <td>5</td> </tr> </table> | 0 | 0   | 1 | 1  | 2 | 2 | 3 | 3 | 4 | 4 | 5 | 5 |
| 0   | 0                                                                                                                                                                                    |                                                                                                                                  |                                                                                                                                                                                                                                                             |   |     |   |    |   |   |   |   |   |   |   |   |
| 1   | 1                                                                                                                                                                                    |                                                                                                                                  |                                                                                                                                                                                                                                                             |   |     |   |    |   |   |   |   |   |   |   |   |
| 2   | 2                                                                                                                                                                                    |                                                                                                                                  |                                                                                                                                                                                                                                                             |   |     |   |    |   |   |   |   |   |   |   |   |
| 3   | 3                                                                                                                                                                                    |                                                                                                                                  |                                                                                                                                                                                                                                                             |   |     |   |    |   |   |   |   |   |   |   |   |
| 4   | 4                                                                                                                                                                                    |                                                                                                                                  |                                                                                                                                                                                                                                                             |   |     |   |    |   |   |   |   |   |   |   |   |
| 5   | 5                                                                                                                                                                                    |                                                                                                                                  |                                                                                                                                                                                                                                                             |   |     |   |    |   |   |   |   |   |   |   |   |
| 208 | <b>pleasant_time1</b><br>Show the field ONLY if:<br>[pleasant_num] = '1' or<br>[pleasant_num] = '2' or<br>[pleasant_num] = '3' or<br>[pleasant_num] = '4' or<br>[pleasant_num] = '5' | Record the date and time of the first instance of pleasant sickness.                                                             | text (datetime_mdy), Required                                                                                                                                                                                                                               |   |     |   |    |   |   |   |   |   |   |   |   |
| 209 | <b>pleasant_time2</b><br>Show the field ONLY if:<br>[pleasant_num] = '2' or<br>[pleasant_num] = '3' or<br>[pleasant_num] = '4' or<br>[pleasant_num] = '5'                            | Record the date and time of the second instance of pleasant sickness.                                                            | text (datetime_mdy), Required                                                                                                                                                                                                                               |   |     |   |    |   |   |   |   |   |   |   |   |



|     |                                                                                                                                              |                                                                                                                      |                                                                                                                                                                                                                                                      |   |     |   |    |   |   |   |   |   |   |   |   |
|-----|----------------------------------------------------------------------------------------------------------------------------------------------|----------------------------------------------------------------------------------------------------------------------|------------------------------------------------------------------------------------------------------------------------------------------------------------------------------------------------------------------------------------------------------|---|-----|---|----|---|---|---|---|---|---|---|---|
| 210 | <b>pleasant_time3</b><br>Show the field ONLY if:<br>[pleasant_num] = '3' or<br>[pleasant_num] = '4' or<br>[pleasant_num] = '5'               | Record the date and time of the third instance of pleasant sickness.                                                 | text (datetime_mdy), Required                                                                                                                                                                                                                        |   |     |   |    |   |   |   |   |   |   |   |   |
| 211 | <b>pleasant_time4</b><br>Show the field ONLY if:<br>[pleasant_num] = '4' or<br>[pleasant_num] = '5'                                          | Record the date and time of the fourth instance of pleasant sickness.                                                | text (datetime_mdy), Required                                                                                                                                                                                                                        |   |     |   |    |   |   |   |   |   |   |   |   |
| 212 | <b>pleasant_time5</b><br>Show the field ONLY if:<br>[pleasant_num] = '5'                                                                     | Record the date and time of the fifth instance of pleasant sickness.                                                 | text (datetime_mdy), Required                                                                                                                                                                                                                        |   |     |   |    |   |   |   |   |   |   |   |   |
| 213 | <b>drive_time_yn</b><br>Show the field ONLY if:<br>[postbup_intox(4)]='1'                                                                    | Did the provider document the time(s) at which having drive was noted?                                               | yesno, Required<br><table border="1"> <tr> <td>1</td> <td>Yes</td> </tr> <tr> <td>0</td> <td>No</td> </tr> </table>                                                                                                                                  | 1 | Yes | 0 | No |   |   |   |   |   |   |   |   |
| 1   | Yes                                                                                                                                          |                                                                                                                      |                                                                                                                                                                                                                                                      |   |     |   |    |   |   |   |   |   |   |   |   |
| 0   | No                                                                                                                                           |                                                                                                                      |                                                                                                                                                                                                                                                      |   |     |   |    |   |   |   |   |   |   |   |   |
| 214 | <b>drive_num</b><br>Show the field ONLY if:<br>[drive_time_yn] = '1'                                                                         | How many instances of drive were documented with timestamps within 6 hours after first buprenorphine administration? | radio, Required<br><table border="1"> <tr> <td>0</td> <td>0</td> </tr> <tr> <td>1</td> <td>1</td> </tr> <tr> <td>2</td> <td>2</td> </tr> <tr> <td>3</td> <td>3</td> </tr> <tr> <td>4</td> <td>4</td> </tr> <tr> <td>5</td> <td>5</td> </tr> </table> | 0 | 0   | 1 | 1  | 2 | 2 | 3 | 3 | 4 | 4 | 5 | 5 |
| 0   | 0                                                                                                                                            |                                                                                                                      |                                                                                                                                                                                                                                                      |   |     |   |    |   |   |   |   |   |   |   |   |
| 1   | 1                                                                                                                                            |                                                                                                                      |                                                                                                                                                                                                                                                      |   |     |   |    |   |   |   |   |   |   |   |   |
| 2   | 2                                                                                                                                            |                                                                                                                      |                                                                                                                                                                                                                                                      |   |     |   |    |   |   |   |   |   |   |   |   |
| 3   | 3                                                                                                                                            |                                                                                                                      |                                                                                                                                                                                                                                                      |   |     |   |    |   |   |   |   |   |   |   |   |
| 4   | 4                                                                                                                                            |                                                                                                                      |                                                                                                                                                                                                                                                      |   |     |   |    |   |   |   |   |   |   |   |   |
| 5   | 5                                                                                                                                            |                                                                                                                      |                                                                                                                                                                                                                                                      |   |     |   |    |   |   |   |   |   |   |   |   |
| 215 | <b>drive_time1</b><br>Show the field ONLY if:<br>[drive_num]='1' or [drive_num]='2' or [drive_num]='3' or [drive_num]='4' or [drive_num]='5' | Record the date and time of the first instance of drive.                                                             | text (datetime_mdy), Required                                                                                                                                                                                                                        |   |     |   |    |   |   |   |   |   |   |   |   |
| 216 | <b>drive_time2</b><br>Show the field ONLY if:<br>[drive_num]='2' or [drive_num]='3' or [drive_num]='4' or [drive_num]='5'                    | Record the date and time of the second instance of drive.                                                            | text (datetime_mdy), Required                                                                                                                                                                                                                        |   |     |   |    |   |   |   |   |   |   |   |   |
| 217 | <b>drive_time3</b><br>Show the field ONLY if:<br>[drive_num]='3' or [drive_num]='4' or [drive_num]='5'                                       | Record the date and time of the third instance of drive.                                                             | text (datetime_mdy), Required                                                                                                                                                                                                                        |   |     |   |    |   |   |   |   |   |   |   |   |
| 218 | <b>drive_time4</b><br>Show the field ONLY if:<br>[drive_num]='4' or [drive_num]='5'                                                          | Record the date and time of the fourth instance of drive.                                                            | text (datetime_mdy), Required                                                                                                                                                                                                                        |   |     |   |    |   |   |   |   |   |   |   |   |
| 219 | <b>drive_time5</b><br>Show the field ONLY if:<br>[drive_num] = '5'                                                                           | Record the date and time of the fifth instance of drive.                                                             | text (datetime_mdy), Required                                                                                                                                                                                                                        |   |     |   |    |   |   |   |   |   |   |   |   |

|     |                                                                                                                                                  |                                                                                                                            |                                                                                                                                                                                                                                                             |   |     |   |    |   |   |   |   |   |   |   |   |
|-----|--------------------------------------------------------------------------------------------------------------------------------------------------|----------------------------------------------------------------------------------------------------------------------------|-------------------------------------------------------------------------------------------------------------------------------------------------------------------------------------------------------------------------------------------------------------|---|-----|---|----|---|---|---|---|---|---|---|---|
| 220 | <b>high_time_yn</b><br>Show the field ONLY if:<br>[postbup_intox(5)='1']                                                                         | Did the provider document the time(s) at which being high was noted?                                                       | <b>yesno, Required</b><br><table border="1"> <tr> <td>1</td> <td>Yes</td> </tr> <tr> <td>0</td> <td>No</td> </tr> </table>                                                                                                                                  | 1 | Yes | 0 | No |   |   |   |   |   |   |   |   |
| 1   | Yes                                                                                                                                              |                                                                                                                            |                                                                                                                                                                                                                                                             |   |     |   |    |   |   |   |   |   |   |   |   |
| 0   | No                                                                                                                                               |                                                                                                                            |                                                                                                                                                                                                                                                             |   |     |   |    |   |   |   |   |   |   |   |   |
| 221 | <b>high_num</b><br>Show the field ONLY if:<br>[high_time_yn] = '1'                                                                               | How many instances of being high were documented with timestamps within 6 hours after first buprenorphine administration?  | <b>radio, Required</b><br><table border="1"> <tr> <td>0</td> <td>0</td> </tr> <tr> <td>1</td> <td>1</td> </tr> <tr> <td>2</td> <td>2</td> </tr> <tr> <td>3</td> <td>3</td> </tr> <tr> <td>4</td> <td>4</td> </tr> <tr> <td>5</td> <td>5</td> </tr> </table> | 0 | 0   | 1 | 1  | 2 | 2 | 3 | 3 | 4 | 4 | 5 | 5 |
| 0   | 0                                                                                                                                                |                                                                                                                            |                                                                                                                                                                                                                                                             |   |     |   |    |   |   |   |   |   |   |   |   |
| 1   | 1                                                                                                                                                |                                                                                                                            |                                                                                                                                                                                                                                                             |   |     |   |    |   |   |   |   |   |   |   |   |
| 2   | 2                                                                                                                                                |                                                                                                                            |                                                                                                                                                                                                                                                             |   |     |   |    |   |   |   |   |   |   |   |   |
| 3   | 3                                                                                                                                                |                                                                                                                            |                                                                                                                                                                                                                                                             |   |     |   |    |   |   |   |   |   |   |   |   |
| 4   | 4                                                                                                                                                |                                                                                                                            |                                                                                                                                                                                                                                                             |   |     |   |    |   |   |   |   |   |   |   |   |
| 5   | 5                                                                                                                                                |                                                                                                                            |                                                                                                                                                                                                                                                             |   |     |   |    |   |   |   |   |   |   |   |   |
| 222 | <b>high_time1</b><br>Show the field ONLY if:<br>[high_num] = '1' or [high_num] = '2' or [high_num] = '3' or [high_num] = '4' or [high_num] = '5' | Record the date and time of the first instance of being high.                                                              | <b>text (datetime_mdy), Required</b>                                                                                                                                                                                                                        |   |     |   |    |   |   |   |   |   |   |   |   |
| 223 | <b>high_time2</b><br>Show the field ONLY if:<br>[high_num] = '2' or [high_num] = '3' or [high_num] = '4' or [high_num] = '5'                     | Record the date and time of the second instance of being high.                                                             | <b>text (datetime_mdy), Required</b>                                                                                                                                                                                                                        |   |     |   |    |   |   |   |   |   |   |   |   |
| 224 | <b>high_time3</b><br>Show the field ONLY if:<br>[high_num] = '3' or [high_num] = '4' or [high_num] = '5'                                         | Record the date and time of the third instance of being high.                                                              | <b>text (datetime_mdy), Required</b>                                                                                                                                                                                                                        |   |     |   |    |   |   |   |   |   |   |   |   |
| 225 | <b>high_time4</b><br>Show the field ONLY if:<br>[high_num] = '4' or [high_num] = '5'                                                             | Record the date and time of the fourth instance of being high.                                                             | <b>text (datetime_mdy), Required</b>                                                                                                                                                                                                                        |   |     |   |    |   |   |   |   |   |   |   |   |
| 226 | <b>high_time5</b><br>Show the field ONLY if:<br>[high_num] = '5'                                                                                 | Record the date and time of the fifth instance of being high.                                                              | <b>text (datetime_mdy), Required</b>                                                                                                                                                                                                                        |   |     |   |    |   |   |   |   |   |   |   |   |
| 227 | <b>drunk_time_yn</b><br>Show the field ONLY if:<br>[postbup_intox(6)='1']                                                                        | Did the provider document the time(s) at which drunkenness was noted?                                                      | <b>yesno, Required</b><br><table border="1"> <tr> <td>1</td> <td>Yes</td> </tr> <tr> <td>0</td> <td>No</td> </tr> </table>                                                                                                                                  | 1 | Yes | 0 | No |   |   |   |   |   |   |   |   |
| 1   | Yes                                                                                                                                              |                                                                                                                            |                                                                                                                                                                                                                                                             |   |     |   |    |   |   |   |   |   |   |   |   |
| 0   | No                                                                                                                                               |                                                                                                                            |                                                                                                                                                                                                                                                             |   |     |   |    |   |   |   |   |   |   |   |   |
| 228 | <b>drunk_num</b><br>Show the field ONLY if:<br>[drunk_time_yn] = '1'                                                                             | How many instances of drunkenness were documented with timestamps within 6 hours after first buprenorphine administration? | <b>radio, Required</b><br><table border="1"> <tr> <td>0</td> <td>0</td> </tr> <tr> <td>1</td> <td>1</td> </tr> <tr> <td>2</td> <td>2</td> </tr> <tr> <td>3</td> <td>3</td> </tr> <tr> <td>4</td> <td>4</td> </tr> <tr> <td>5</td> <td>5</td> </tr> </table> | 0 | 0   | 1 | 1  | 2 | 2 | 3 | 3 | 4 | 4 | 5 | 5 |
| 0   | 0                                                                                                                                                |                                                                                                                            |                                                                                                                                                                                                                                                             |   |     |   |    |   |   |   |   |   |   |   |   |
| 1   | 1                                                                                                                                                |                                                                                                                            |                                                                                                                                                                                                                                                             |   |     |   |    |   |   |   |   |   |   |   |   |
| 2   | 2                                                                                                                                                |                                                                                                                            |                                                                                                                                                                                                                                                             |   |     |   |    |   |   |   |   |   |   |   |   |
| 3   | 3                                                                                                                                                |                                                                                                                            |                                                                                                                                                                                                                                                             |   |     |   |    |   |   |   |   |   |   |   |   |
| 4   | 4                                                                                                                                                |                                                                                                                            |                                                                                                                                                                                                                                                             |   |     |   |    |   |   |   |   |   |   |   |   |
| 5   | 5                                                                                                                                                |                                                                                                                            |                                                                                                                                                                                                                                                             |   |     |   |    |   |   |   |   |   |   |   |   |

|     |                                                                                                                                                                    |                                                                                                                              |                                                                                                                                                                                                                                                      |   |     |   |    |   |   |   |   |   |   |   |   |
|-----|--------------------------------------------------------------------------------------------------------------------------------------------------------------------|------------------------------------------------------------------------------------------------------------------------------|------------------------------------------------------------------------------------------------------------------------------------------------------------------------------------------------------------------------------------------------------|---|-----|---|----|---|---|---|---|---|---|---|---|
| 229 | <b>drunk_time1</b><br>Show the field ONLY if:<br>[drunk_num] = '1' or [drunk_num] = '2' or [drunk_num] = '3' or [drunk_num] = '4' or [drunk_num] = '5'             | Record the date and time of the first instance of drunkenness.                                                               | text (datetime_mdy), Required                                                                                                                                                                                                                        |   |     |   |    |   |   |   |   |   |   |   |   |
| 230 | <b>drunk_time2</b><br>Show the field ONLY if:<br>[drunk_num] = '2' or [drunk_num] = '3' or [drunk_num] = '4' or [drunk_num] = '5'                                  | Record the date and time of the second instance of drunkenness.                                                              | text (datetime_mdy), Required                                                                                                                                                                                                                        |   |     |   |    |   |   |   |   |   |   |   |   |
| 231 | <b>drunk_time3</b><br>Show the field ONLY if:<br>[drunk_num] = '3' or [drunk_num] = '4' or [drunk_num] = '5'                                                       | Record the date and time of the third instance of drunkenness.                                                               | text (datetime_mdy), Required                                                                                                                                                                                                                        |   |     |   |    |   |   |   |   |   |   |   |   |
| 232 | <b>drunk_time4</b><br>Show the field ONLY if:<br>[drunk_num] = '4' or [drunk_num] = '5'                                                                            | Record the date and time of the fourth instance of drunkenness.                                                              | text (datetime_mdy), Required                                                                                                                                                                                                                        |   |     |   |    |   |   |   |   |   |   |   |   |
| 233 | <b>drunk_time5</b><br>Show the field ONLY if:<br>[drunk_num] = '5'                                                                                                 | Record the date and time of the fifth instance of drunkenness.                                                               | text (datetime_mdy), Required                                                                                                                                                                                                                        |   |     |   |    |   |   |   |   |   |   |   |   |
| 234 | <b>soapbox_time_yn</b><br>Show the field ONLY if:<br>[postbup_intox(7)]='1'                                                                                        | Did the provider document the time(s) at which talkativeness (soapbox) was noted?                                            | yesno, Required<br><table border="1"> <tr> <td>1</td> <td>Yes</td> </tr> <tr> <td>0</td> <td>No</td> </tr> </table>                                                                                                                                  | 1 | Yes | 0 | No |   |   |   |   |   |   |   |   |
| 1   | Yes                                                                                                                                                                |                                                                                                                              |                                                                                                                                                                                                                                                      |   |     |   |    |   |   |   |   |   |   |   |   |
| 0   | No                                                                                                                                                                 |                                                                                                                              |                                                                                                                                                                                                                                                      |   |     |   |    |   |   |   |   |   |   |   |   |
| 235 | <b>soapbox_num</b><br>Show the field ONLY if:<br>[soapbox_time_yn] = '1'                                                                                           | How many instances of talkativeness were documented with timestamps within 6 hours after first buprenorphine administration? | radio, Required<br><table border="1"> <tr> <td>0</td> <td>0</td> </tr> <tr> <td>1</td> <td>1</td> </tr> <tr> <td>2</td> <td>2</td> </tr> <tr> <td>3</td> <td>3</td> </tr> <tr> <td>4</td> <td>4</td> </tr> <tr> <td>5</td> <td>5</td> </tr> </table> | 0 | 0   | 1 | 1  | 2 | 2 | 3 | 3 | 4 | 4 | 5 | 5 |
| 0   | 0                                                                                                                                                                  |                                                                                                                              |                                                                                                                                                                                                                                                      |   |     |   |    |   |   |   |   |   |   |   |   |
| 1   | 1                                                                                                                                                                  |                                                                                                                              |                                                                                                                                                                                                                                                      |   |     |   |    |   |   |   |   |   |   |   |   |
| 2   | 2                                                                                                                                                                  |                                                                                                                              |                                                                                                                                                                                                                                                      |   |     |   |    |   |   |   |   |   |   |   |   |
| 3   | 3                                                                                                                                                                  |                                                                                                                              |                                                                                                                                                                                                                                                      |   |     |   |    |   |   |   |   |   |   |   |   |
| 4   | 4                                                                                                                                                                  |                                                                                                                              |                                                                                                                                                                                                                                                      |   |     |   |    |   |   |   |   |   |   |   |   |
| 5   | 5                                                                                                                                                                  |                                                                                                                              |                                                                                                                                                                                                                                                      |   |     |   |    |   |   |   |   |   |   |   |   |
| 236 | <b>soapbox_time1</b><br>Show the field ONLY if:<br>[soapbox_num] = '1' or [soapbox_num] = '2' or [soapbox_num] = '3' or [soapbox_num] = '4' or [soapbox_num] = '5' | Record the date and time of the first instance of talkativeness.                                                             | text (datetime_mdy), Required                                                                                                                                                                                                                        |   |     |   |    |   |   |   |   |   |   |   |   |
| 237 | <b>soapbox_time2</b><br>Show the field ONLY if:<br>[soapbox_num] = '2' or [soapbox_num] = '3' or [soapbox_num] = '4' or [soapbox_num] = '5'                        | Record the date and time of the second instance of talkativeness.                                                            | text (datetime_mdy), Required                                                                                                                                                                                                                        |   |     |   |    |   |   |   |   |   |   |   |   |

|     |                                                                                                                                          |                                                                                                                     |                                                                                                                                                                                                                                                             |   |     |   |    |   |   |   |   |   |   |   |   |
|-----|------------------------------------------------------------------------------------------------------------------------------------------|---------------------------------------------------------------------------------------------------------------------|-------------------------------------------------------------------------------------------------------------------------------------------------------------------------------------------------------------------------------------------------------------|---|-----|---|----|---|---|---|---|---|---|---|---|
| 238 | <b>soapbox_time3</b><br>Show the field ONLY if:<br>[soapbox_num]='3' or<br>[soapbox_num]='4' or<br>[soapbox_num]='5'                     | Record the date and time of the third instance of talkativeness.                                                    | text (datetime_mdy), Required                                                                                                                                                                                                                               |   |     |   |    |   |   |   |   |   |   |   |   |
| 239 | <b>soapbox_time4</b><br>Show the field ONLY if:<br>[soapbox_num]='4' or<br>[soapbox_num]='5'                                             | Record the date and time of the fourth instance of talkativeness.                                                   | text (datetime_mdy), Required                                                                                                                                                                                                                               |   |     |   |    |   |   |   |   |   |   |   |   |
| 240 | <b>soapbox_time5</b><br>Show the field ONLY if:<br>[soapbox_num] = '5'                                                                   | Record the date and time of the fifth instance of talkativeness.                                                    | text (datetime_mdy), Required                                                                                                                                                                                                                               |   |     |   |    |   |   |   |   |   |   |   |   |
| 241 | <b>rush_time_yn</b><br>Show the field ONLY if:<br>[postbup_intox(8)]= '1'                                                                | Did the provider document the time(s) at which rush was noted?                                                      | <b>yesno, Required</b><br><table border="1"> <tr> <td>1</td> <td>Yes</td> </tr> <tr> <td>0</td> <td>No</td> </tr> </table>                                                                                                                                  | 1 | Yes | 0 | No |   |   |   |   |   |   |   |   |
| 1   | Yes                                                                                                                                      |                                                                                                                     |                                                                                                                                                                                                                                                             |   |     |   |    |   |   |   |   |   |   |   |   |
| 0   | No                                                                                                                                       |                                                                                                                     |                                                                                                                                                                                                                                                             |   |     |   |    |   |   |   |   |   |   |   |   |
| 242 | <b>rush_num</b><br>Show the field ONLY if:<br>[rush_time_yn] = '1'                                                                       | How many instances of rush were documented with timestamps within 6 hours after first buprenorphine administration? | <b>radio, Required</b><br><table border="1"> <tr> <td>0</td> <td>0</td> </tr> <tr> <td>1</td> <td>1</td> </tr> <tr> <td>2</td> <td>2</td> </tr> <tr> <td>3</td> <td>3</td> </tr> <tr> <td>4</td> <td>4</td> </tr> <tr> <td>5</td> <td>5</td> </tr> </table> | 0 | 0   | 1 | 1  | 2 | 2 | 3 | 3 | 4 | 4 | 5 | 5 |
| 0   | 0                                                                                                                                        |                                                                                                                     |                                                                                                                                                                                                                                                             |   |     |   |    |   |   |   |   |   |   |   |   |
| 1   | 1                                                                                                                                        |                                                                                                                     |                                                                                                                                                                                                                                                             |   |     |   |    |   |   |   |   |   |   |   |   |
| 2   | 2                                                                                                                                        |                                                                                                                     |                                                                                                                                                                                                                                                             |   |     |   |    |   |   |   |   |   |   |   |   |
| 3   | 3                                                                                                                                        |                                                                                                                     |                                                                                                                                                                                                                                                             |   |     |   |    |   |   |   |   |   |   |   |   |
| 4   | 4                                                                                                                                        |                                                                                                                     |                                                                                                                                                                                                                                                             |   |     |   |    |   |   |   |   |   |   |   |   |
| 5   | 5                                                                                                                                        |                                                                                                                     |                                                                                                                                                                                                                                                             |   |     |   |    |   |   |   |   |   |   |   |   |
| 243 | <b>rush_time1</b><br>Show the field ONLY if:<br>[rush_num]='1' or [rush_h_num]='2' or [rush_num]='3' or [rush_num]='4' or [rush_num]='5' | Record the date and time of the first instance of rush.                                                             | text (datetime_mdy), Required                                                                                                                                                                                                                               |   |     |   |    |   |   |   |   |   |   |   |   |
| 244 | <b>rush_time2</b><br>Show the field ONLY if:<br>[rush_num]='2' or [rush_h_num]='3' or [rush_num]='4' or [rush_num]='5'                   | Record the date and time of the second instance of rush.                                                            | text (datetime_mdy), Required                                                                                                                                                                                                                               |   |     |   |    |   |   |   |   |   |   |   |   |
| 245 | <b>rush_time3</b><br>Show the field ONLY if:<br>[rush_num]='3' or [rush_h_num]='4' or [rush_num]='5'                                     | Record the date and time of the third instance of rush.                                                             | text (datetime_mdy), Required                                                                                                                                                                                                                               |   |     |   |    |   |   |   |   |   |   |   |   |
| 246 | <b>rush_time4</b><br>Show the field ONLY if:<br>[rush_num] = '4' or [rush_h_num] = '5'                                                   | Record the date and time of the fourth instance of rush.                                                            | text (datetime_mdy), Required                                                                                                                                                                                                                               |   |     |   |    |   |   |   |   |   |   |   |   |
| 247 | <b>rush_time5</b><br>Show the field ONLY if:<br>[rush_num] = '5'                                                                         | Record the date and time of the fifth instance of rush.                                                             | text (datetime_mdy), Required                                                                                                                                                                                                                               |   |     |   |    |   |   |   |   |   |   |   |   |

|     |                                                                                                                                                                                |                                                                                                                                    |                                                                                                                                                                                                                                                             |   |     |   |    |   |   |   |   |   |   |   |   |
|-----|--------------------------------------------------------------------------------------------------------------------------------------------------------------------------------|------------------------------------------------------------------------------------------------------------------------------------|-------------------------------------------------------------------------------------------------------------------------------------------------------------------------------------------------------------------------------------------------------------|---|-----|---|----|---|---|---|---|---|---|---|---|
| 248 | <b>friendly_time_yn</b><br>Show the field ONLY if:<br>[postbup_intox(9)='1']                                                                                                   | Did the provider document the time(s) at which<br>friendliness was noted?                                                          | <b>yesno, Required</b><br><table border="1"> <tr> <td>1</td> <td>Yes</td> </tr> <tr> <td>0</td> <td>No</td> </tr> </table>                                                                                                                                  | 1 | Yes | 0 | No |   |   |   |   |   |   |   |   |
| 1   | Yes                                                                                                                                                                            |                                                                                                                                    |                                                                                                                                                                                                                                                             |   |     |   |    |   |   |   |   |   |   |   |   |
| 0   | No                                                                                                                                                                             |                                                                                                                                    |                                                                                                                                                                                                                                                             |   |     |   |    |   |   |   |   |   |   |   |   |
| 249 | <b>friendly_num</b><br>Show the field ONLY if:<br>[friendly_time_yn]='1']                                                                                                      | How many instances of friendliness were<br>documented with timestamps within 6 hours<br>after first buprenorphine administration?  | <b>radio, Required</b><br><table border="1"> <tr> <td>0</td> <td>0</td> </tr> <tr> <td>1</td> <td>1</td> </tr> <tr> <td>2</td> <td>2</td> </tr> <tr> <td>3</td> <td>3</td> </tr> <tr> <td>4</td> <td>4</td> </tr> <tr> <td>5</td> <td>5</td> </tr> </table> | 0 | 0   | 1 | 1  | 2 | 2 | 3 | 3 | 4 | 4 | 5 | 5 |
| 0   | 0                                                                                                                                                                              |                                                                                                                                    |                                                                                                                                                                                                                                                             |   |     |   |    |   |   |   |   |   |   |   |   |
| 1   | 1                                                                                                                                                                              |                                                                                                                                    |                                                                                                                                                                                                                                                             |   |     |   |    |   |   |   |   |   |   |   |   |
| 2   | 2                                                                                                                                                                              |                                                                                                                                    |                                                                                                                                                                                                                                                             |   |     |   |    |   |   |   |   |   |   |   |   |
| 3   | 3                                                                                                                                                                              |                                                                                                                                    |                                                                                                                                                                                                                                                             |   |     |   |    |   |   |   |   |   |   |   |   |
| 4   | 4                                                                                                                                                                              |                                                                                                                                    |                                                                                                                                                                                                                                                             |   |     |   |    |   |   |   |   |   |   |   |   |
| 5   | 5                                                                                                                                                                              |                                                                                                                                    |                                                                                                                                                                                                                                                             |   |     |   |    |   |   |   |   |   |   |   |   |
| 250 | <b>friendly_time1</b><br>Show the field ONLY if:<br>[friendly_num]='1' or [f<br>riendly_num]='2' or [fri<br>endly_num]='3' or [frie<br>ndly_num]='4' or [frien<br>dly_num]='5' | Record the date and time of the first instance of<br>friendliness.                                                                 | <b>text (datetime_mdy), Required</b>                                                                                                                                                                                                                        |   |     |   |    |   |   |   |   |   |   |   |   |
| 251 | <b>friendly_time2</b><br>Show the field ONLY if:<br>[friendly_num]='2' or [f<br>riendly_num]='3' or [fri<br>endly_num]='4' or [frie<br>ndly_num]='5'                           | Record the date and time of the second<br>instance of friendliness.                                                                | <b>text (datetime_mdy), Required</b>                                                                                                                                                                                                                        |   |     |   |    |   |   |   |   |   |   |   |   |
| 252 | <b>friendly_time3</b><br>Show the field ONLY if:<br>[friendly_num]='3' or [f<br>riendly_num]='4' or [fri<br>endly_num]='5'                                                     | Record the date and time of the third instance<br>of friendliness.                                                                 | <b>text (datetime_mdy), Required</b>                                                                                                                                                                                                                        |   |     |   |    |   |   |   |   |   |   |   |   |
| 253 | <b>friendly_time4</b><br>Show the field ONLY if:<br>[friendly_num]='4' or [f<br>riendly_num]='5'                                                                               | Record date and the time of the fourth instance<br>of friendliness.                                                                | <b>text (datetime_mdy), Required</b>                                                                                                                                                                                                                        |   |     |   |    |   |   |   |   |   |   |   |   |
| 254 | <b>friendly_time5</b><br>Show the field ONLY if:<br>[friendly_num]='5'                                                                                                         | Record the date and time of the fifth instance of<br>friendliness.                                                                 | <b>text (datetime_mdy), Required</b>                                                                                                                                                                                                                        |   |     |   |    |   |   |   |   |   |   |   |   |
| 255 | <b>relaxed_time_yn</b><br>Show the field ONLY if:<br>[postbup_intox(10)='1']                                                                                                   | Did the provider document the time(s) at which<br>being relaxed was noted?                                                         | <b>yesno, Required</b><br><table border="1"> <tr> <td>1</td> <td>Yes</td> </tr> <tr> <td>0</td> <td>No</td> </tr> </table>                                                                                                                                  | 1 | Yes | 0 | No |   |   |   |   |   |   |   |   |
| 1   | Yes                                                                                                                                                                            |                                                                                                                                    |                                                                                                                                                                                                                                                             |   |     |   |    |   |   |   |   |   |   |   |   |
| 0   | No                                                                                                                                                                             |                                                                                                                                    |                                                                                                                                                                                                                                                             |   |     |   |    |   |   |   |   |   |   |   |   |
| 256 | <b>relaxed_num</b><br>Show the field ONLY if:<br>[relaxed_time_yn]='1']                                                                                                        | How many instances of being relaxed were<br>documented with timestamps within 6 hours<br>after first buprenorphine administration? | <b>radio, Required</b><br><table border="1"> <tr> <td>0</td> <td>0</td> </tr> <tr> <td>1</td> <td>1</td> </tr> <tr> <td>2</td> <td>2</td> </tr> <tr> <td>3</td> <td>3</td> </tr> <tr> <td>4</td> <td>4</td> </tr> <tr> <td>5</td> <td>5</td> </tr> </table> | 0 | 0   | 1 | 1  | 2 | 2 | 3 | 3 | 4 | 4 | 5 | 5 |
| 0   | 0                                                                                                                                                                              |                                                                                                                                    |                                                                                                                                                                                                                                                             |   |     |   |    |   |   |   |   |   |   |   |   |
| 1   | 1                                                                                                                                                                              |                                                                                                                                    |                                                                                                                                                                                                                                                             |   |     |   |    |   |   |   |   |   |   |   |   |
| 2   | 2                                                                                                                                                                              |                                                                                                                                    |                                                                                                                                                                                                                                                             |   |     |   |    |   |   |   |   |   |   |   |   |
| 3   | 3                                                                                                                                                                              |                                                                                                                                    |                                                                                                                                                                                                                                                             |   |     |   |    |   |   |   |   |   |   |   |   |
| 4   | 4                                                                                                                                                                              |                                                                                                                                    |                                                                                                                                                                                                                                                             |   |     |   |    |   |   |   |   |   |   |   |   |
| 5   | 5                                                                                                                                                                              |                                                                                                                                    |                                                                                                                                                                                                                                                             |   |     |   |    |   |   |   |   |   |   |   |   |

|     |                                                                                                                                                                                                        |                                                                                                                                         |                                                                                                                                                                                                                                                          |   |     |   |    |   |   |   |   |   |   |   |   |
|-----|--------------------------------------------------------------------------------------------------------------------------------------------------------------------------------------------------------|-----------------------------------------------------------------------------------------------------------------------------------------|----------------------------------------------------------------------------------------------------------------------------------------------------------------------------------------------------------------------------------------------------------|---|-----|---|----|---|---|---|---|---|---|---|---|
| 257 | <p><b>relaxed_time1</b></p> <p>Show the field ONLY if:<br/>[relaxed_num]='1' or [relaxed_num]='2' or [relaxed_num]='3' or [relaxed_num]='4' or [relaxed_num]='5'</p>                                   | Record the date and time of the first instance of being relaxed.                                                                        | text (datetime_mdy), Required                                                                                                                                                                                                                            |   |     |   |    |   |   |   |   |   |   |   |   |
| 258 | <p><b>relaxed_time2</b></p> <p>Show the field ONLY if:<br/>[relaxed_num]='2' or [relaxed_num]='3' or [relaxed_num]='4' or [relaxed_num]='5'</p>                                                        | Record the date and time of the second instance of being relaxed.                                                                       | text (datetime_mdy), Required                                                                                                                                                                                                                            |   |     |   |    |   |   |   |   |   |   |   |   |
| 259 | <p><b>relaxed_time3</b></p> <p>Show the field ONLY if:<br/>[relaxed_num]='3' or [relaxed_num]='4' or [relaxed_num]='5'</p>                                                                             | Record the date and time of the third instance of being relaxed.                                                                        | text (datetime_mdy), Required                                                                                                                                                                                                                            |   |     |   |    |   |   |   |   |   |   |   |   |
| 260 | <p><b>relaxed_time4</b></p> <p>Show the field ONLY if:<br/>[relaxed_num]='4' or [relaxed_num]='5'</p>                                                                                                  | Record the date and time of the fourth instance of being relaxed.                                                                       | text (datetime_mdy), Required                                                                                                                                                                                                                            |   |     |   |    |   |   |   |   |   |   |   |   |
| 261 | <p><b>relaxed_time5</b></p> <p>Show the field ONLY if:<br/>[relaxed_num]='5'</p>                                                                                                                       | Record the date and time of the fifth instance of being relaxed.                                                                        | text (datetime_mdy), Required                                                                                                                                                                                                                            |   |     |   |    |   |   |   |   |   |   |   |   |
| 262 | <p><b>concentrate_time_yn</b></p> <p>Show the field ONLY if:<br/>[postbup_intox(11)]= '1'</p>                                                                                                          | Did the provider document the time(s) at which difficulty concentrating was noted?                                                      | <p>yesno, Required</p> <table border="1"> <tr> <td>1</td> <td>Yes</td> </tr> <tr> <td>0</td> <td>No</td> </tr> </table>                                                                                                                                  | 1 | Yes | 0 | No |   |   |   |   |   |   |   |   |
| 1   | Yes                                                                                                                                                                                                    |                                                                                                                                         |                                                                                                                                                                                                                                                          |   |     |   |    |   |   |   |   |   |   |   |   |
| 0   | No                                                                                                                                                                                                     |                                                                                                                                         |                                                                                                                                                                                                                                                          |   |     |   |    |   |   |   |   |   |   |   |   |
| 263 | <p><b>concentrate_num</b></p> <p>Show the field ONLY if:<br/>[concentrate_time_yn] = '1'</p>                                                                                                           | How many instances of difficulty concentrating were documented with timestamps within 6 hours after first buprenorphine administration? | <p>radio, Required</p> <table border="1"> <tr> <td>0</td> <td>0</td> </tr> <tr> <td>1</td> <td>1</td> </tr> <tr> <td>2</td> <td>2</td> </tr> <tr> <td>3</td> <td>3</td> </tr> <tr> <td>4</td> <td>4</td> </tr> <tr> <td>5</td> <td>5</td> </tr> </table> | 0 | 0   | 1 | 1  | 2 | 2 | 3 | 3 | 4 | 4 | 5 | 5 |
| 0   | 0                                                                                                                                                                                                      |                                                                                                                                         |                                                                                                                                                                                                                                                          |   |     |   |    |   |   |   |   |   |   |   |   |
| 1   | 1                                                                                                                                                                                                      |                                                                                                                                         |                                                                                                                                                                                                                                                          |   |     |   |    |   |   |   |   |   |   |   |   |
| 2   | 2                                                                                                                                                                                                      |                                                                                                                                         |                                                                                                                                                                                                                                                          |   |     |   |    |   |   |   |   |   |   |   |   |
| 3   | 3                                                                                                                                                                                                      |                                                                                                                                         |                                                                                                                                                                                                                                                          |   |     |   |    |   |   |   |   |   |   |   |   |
| 4   | 4                                                                                                                                                                                                      |                                                                                                                                         |                                                                                                                                                                                                                                                          |   |     |   |    |   |   |   |   |   |   |   |   |
| 5   | 5                                                                                                                                                                                                      |                                                                                                                                         |                                                                                                                                                                                                                                                          |   |     |   |    |   |   |   |   |   |   |   |   |
| 264 | <p><b>concentrate_time1</b></p> <p>Show the field ONLY if:<br/>[concentrate_num] = '1' or [concentrate_num] = '2' or [concentrate_num] = '3' or [concentrate_num] = '4' or [concentrate_num] = '5'</p> | Record the date and time of the first instance of difficulty concentrating.                                                             | text (datetime_mdy), Required                                                                                                                                                                                                                            |   |     |   |    |   |   |   |   |   |   |   |   |

|     |                                                                                                                                                                             |                                                                                                                                             |                                                                                                                                                                                                                                                      |   |     |   |    |   |   |   |   |   |   |   |   |
|-----|-----------------------------------------------------------------------------------------------------------------------------------------------------------------------------|---------------------------------------------------------------------------------------------------------------------------------------------|------------------------------------------------------------------------------------------------------------------------------------------------------------------------------------------------------------------------------------------------------|---|-----|---|----|---|---|---|---|---|---|---|---|
| 265 | <b>concentrate_time2</b><br>Show the field ONLY if:<br>[concentrate_num] = '2'<br>or [concentrate_num] =<br>'3' or [concentrate_num]<br>= '4' or [concentrate_num]<br>= '5' | Record the date and time of the second instance of difficulty concentrating.                                                                | text (datetime_mdy), Required                                                                                                                                                                                                                        |   |     |   |    |   |   |   |   |   |   |   |   |
| 266 | <b>concentrate_time3</b><br>Show the field ONLY if:<br>[concentrate_num] = '3'<br>or [concentrate_num] =<br>'4' or [concentrate_num]<br>= '5'                               | Record the date and time of the third instance of difficulty concentrating.                                                                 | text (datetime_mdy), Required                                                                                                                                                                                                                        |   |     |   |    |   |   |   |   |   |   |   |   |
| 267 | <b>concentrate_time4</b><br>Show the field ONLY if:<br>[concentrate_num] = '4'<br>or [concentrate_num] =<br>'5'                                                             | Record the date and time of the fourth instance of difficulty concentrating.                                                                | text (datetime_mdy), Required                                                                                                                                                                                                                        |   |     |   |    |   |   |   |   |   |   |   |   |
| 268 | <b>concentrate_time5</b><br>Show the field ONLY if:<br>[concentrate_num] = '5'                                                                                              | Record the date and time of the fifth instance of difficulty concentrating.                                                                 | text (datetime_mdy), Required                                                                                                                                                                                                                        |   |     |   |    |   |   |   |   |   |   |   |   |
| 269 | <b>dizzy_time_yn</b><br>Show the field ONLY if:<br>[postbup_intox(12)]= '1'                                                                                                 | Did the provider document the time(s) at which lightheadedness or dizziness were noted?                                                     | yesno, Required<br><table border="1"> <tr> <td>1</td> <td>Yes</td> </tr> <tr> <td>0</td> <td>No</td> </tr> </table>                                                                                                                                  | 1 | Yes | 0 | No |   |   |   |   |   |   |   |   |
| 1   | Yes                                                                                                                                                                         |                                                                                                                                             |                                                                                                                                                                                                                                                      |   |     |   |    |   |   |   |   |   |   |   |   |
| 0   | No                                                                                                                                                                          |                                                                                                                                             |                                                                                                                                                                                                                                                      |   |     |   |    |   |   |   |   |   |   |   |   |
| 270 | <b>dizzy_num</b><br>Show the field ONLY if:<br>[dizzy_time_yn] = '1'                                                                                                        | How many instances of lightheadedness or dizziness were documented with timestamps within 6 hours after first buprenorphine administration? | radio, Required<br><table border="1"> <tr> <td>0</td> <td>0</td> </tr> <tr> <td>1</td> <td>1</td> </tr> <tr> <td>2</td> <td>2</td> </tr> <tr> <td>3</td> <td>3</td> </tr> <tr> <td>4</td> <td>4</td> </tr> <tr> <td>5</td> <td>5</td> </tr> </table> | 0 | 0   | 1 | 1  | 2 | 2 | 3 | 3 | 4 | 4 | 5 | 5 |
| 0   | 0                                                                                                                                                                           |                                                                                                                                             |                                                                                                                                                                                                                                                      |   |     |   |    |   |   |   |   |   |   |   |   |
| 1   | 1                                                                                                                                                                           |                                                                                                                                             |                                                                                                                                                                                                                                                      |   |     |   |    |   |   |   |   |   |   |   |   |
| 2   | 2                                                                                                                                                                           |                                                                                                                                             |                                                                                                                                                                                                                                                      |   |     |   |    |   |   |   |   |   |   |   |   |
| 3   | 3                                                                                                                                                                           |                                                                                                                                             |                                                                                                                                                                                                                                                      |   |     |   |    |   |   |   |   |   |   |   |   |
| 4   | 4                                                                                                                                                                           |                                                                                                                                             |                                                                                                                                                                                                                                                      |   |     |   |    |   |   |   |   |   |   |   |   |
| 5   | 5                                                                                                                                                                           |                                                                                                                                             |                                                                                                                                                                                                                                                      |   |     |   |    |   |   |   |   |   |   |   |   |
| 271 | <b>dizzy_time1</b><br>Show the field ONLY if:<br>[dizzy_num] = '1' or [dizz<br>y_num] = '2' or [dizzy_n<br>um] = '3' or [dizzy_num]<br>= '4' or [dizzy_num] = '5'           | Record the date and time of the first instance of lightheadedness or dizziness.                                                             | text (datetime_mdy), Required                                                                                                                                                                                                                        |   |     |   |    |   |   |   |   |   |   |   |   |
| 272 | <b>dizzy_time2</b><br>Show the field ONLY if:<br>[dizzy_num] = '2' or [dizz<br>y_num] = '3' or [dizzy_n<br>um] = '4' or [dizzy_num]<br>= '5'                                | Record the date and time of the second instance of lightheadedness or dizziness.                                                            | text (datetime_mdy), Required                                                                                                                                                                                                                        |   |     |   |    |   |   |   |   |   |   |   |   |
| 273 | <b>dizzy_time3</b><br>Show the field ONLY if:<br>[dizzy_num] = '3' or [dizz<br>y_num] = '4' or [dizzy_n<br>um] = '5'                                                        | Record the date and time of the third instance of lightheadedness or dizziness.                                                             | text (datetime_mdy), Required                                                                                                                                                                                                                        |   |     |   |    |   |   |   |   |   |   |   |   |

|     |                                                                                                                                                                                  |                                                                                                                          |                                                                                                                                                                                                                                                      |   |     |   |    |   |   |   |   |   |   |   |   |
|-----|----------------------------------------------------------------------------------------------------------------------------------------------------------------------------------|--------------------------------------------------------------------------------------------------------------------------|------------------------------------------------------------------------------------------------------------------------------------------------------------------------------------------------------------------------------------------------------|---|-----|---|----|---|---|---|---|---|---|---|---|
| 274 | <b>dizzy_time4</b><br>Show the field ONLY if:<br>[dizzy_num]='4' or [dizzy_num]='5'                                                                                              | Record the date and time of the fourth instance of lightheadedness or dizziness.                                         | text (datetime_mdy), Required                                                                                                                                                                                                                        |   |     |   |    |   |   |   |   |   |   |   |   |
| 275 | <b>dizzy_time5</b><br>Show the field ONLY if:<br>[dizzy_num]='5'                                                                                                                 | Record the date and time of the fifth instance of lightheadedness or dizziness.                                          | text (datetime_mdy), Required                                                                                                                                                                                                                        |   |     |   |    |   |   |   |   |   |   |   |   |
| 276 | <b>confusion_time_yn</b><br>Show the field ONLY if:<br>[postbup_intox(13)]= '1'                                                                                                  | Did the provider document the time(s) at which confusion was noted?                                                      | yesno, Required<br><table border="1"> <tr> <td>1</td> <td>Yes</td> </tr> <tr> <td>0</td> <td>No</td> </tr> </table>                                                                                                                                  | 1 | Yes | 0 | No |   |   |   |   |   |   |   |   |
| 1   | Yes                                                                                                                                                                              |                                                                                                                          |                                                                                                                                                                                                                                                      |   |     |   |    |   |   |   |   |   |   |   |   |
| 0   | No                                                                                                                                                                               |                                                                                                                          |                                                                                                                                                                                                                                                      |   |     |   |    |   |   |   |   |   |   |   |   |
| 277 | <b>confusion_num</b><br>Show the field ONLY if:<br>[confusion_time_yn]='1'                                                                                                       | How many instances of confusion were documented with timestamps within 6 hours after first buprenorphine administration? | radio, Required<br><table border="1"> <tr> <td>0</td> <td>0</td> </tr> <tr> <td>1</td> <td>1</td> </tr> <tr> <td>2</td> <td>2</td> </tr> <tr> <td>3</td> <td>3</td> </tr> <tr> <td>4</td> <td>4</td> </tr> <tr> <td>5</td> <td>5</td> </tr> </table> | 0 | 0   | 1 | 1  | 2 | 2 | 3 | 3 | 4 | 4 | 5 | 5 |
| 0   | 0                                                                                                                                                                                |                                                                                                                          |                                                                                                                                                                                                                                                      |   |     |   |    |   |   |   |   |   |   |   |   |
| 1   | 1                                                                                                                                                                                |                                                                                                                          |                                                                                                                                                                                                                                                      |   |     |   |    |   |   |   |   |   |   |   |   |
| 2   | 2                                                                                                                                                                                |                                                                                                                          |                                                                                                                                                                                                                                                      |   |     |   |    |   |   |   |   |   |   |   |   |
| 3   | 3                                                                                                                                                                                |                                                                                                                          |                                                                                                                                                                                                                                                      |   |     |   |    |   |   |   |   |   |   |   |   |
| 4   | 4                                                                                                                                                                                |                                                                                                                          |                                                                                                                                                                                                                                                      |   |     |   |    |   |   |   |   |   |   |   |   |
| 5   | 5                                                                                                                                                                                |                                                                                                                          |                                                                                                                                                                                                                                                      |   |     |   |    |   |   |   |   |   |   |   |   |
| 278 | <b>confusion_time1</b><br>Show the field ONLY if:<br>[confusion_num]='1' or<br>[confusion_num]='2' or<br>[confusion_num]='3' or<br>[confusion_num]='4' or<br>[confusion_num]='5' | Record the date and time of the first instance of confusion.                                                             | text (datetime_mdy), Required                                                                                                                                                                                                                        |   |     |   |    |   |   |   |   |   |   |   |   |
| 279 | <b>confusion_time2</b><br>Show the field ONLY if:<br>[confusion_num]='2' or<br>[confusion_num]='3' or<br>[confusion_num]='4' or<br>[confusion_num]='5'                           | Record the date and time of the second instance of confusion.                                                            | text (datetime_mdy), Required                                                                                                                                                                                                                        |   |     |   |    |   |   |   |   |   |   |   |   |
| 280 | <b>confusion_time3</b><br>Show the field ONLY if:<br>[confusion_num]='3' or<br>[confusion_num]='4' or<br>[confusion_num]='5'                                                     | Record the date and time of the third instance of confusion.                                                             | text (datetime_mdy), Required                                                                                                                                                                                                                        |   |     |   |    |   |   |   |   |   |   |   |   |
| 281 | <b>confusion_time4</b><br>Show the field ONLY if:<br>[confusion_num]='4' or<br>[confusion_num]='5'                                                                               | Record the date and time of the fourth instance of confusion.                                                            | text (datetime_mdy), Required                                                                                                                                                                                                                        |   |     |   |    |   |   |   |   |   |   |   |   |
| 282 | <b>confusion_time5</b><br>Show the field ONLY if:<br>[confusion_num]='5'                                                                                                         | Record the date and time of the fifth instance of confusion.                                                             | text (datetime_mdy), Required                                                                                                                                                                                                                        |   |     |   |    |   |   |   |   |   |   |   |   |



|     |                                                                                                                                                                                                                                                            |                                                                                                                                                                                                                                                       |                                                                                                                                                                                                                                                                                                                                                                                                                                                                                                                   |   |              |              |    |              |                                      |   |              |        |   |              |          |   |              |          |   |              |                   |
|-----|------------------------------------------------------------------------------------------------------------------------------------------------------------------------------------------------------------------------------------------------------------|-------------------------------------------------------------------------------------------------------------------------------------------------------------------------------------------------------------------------------------------------------|-------------------------------------------------------------------------------------------------------------------------------------------------------------------------------------------------------------------------------------------------------------------------------------------------------------------------------------------------------------------------------------------------------------------------------------------------------------------------------------------------------------------|---|--------------|--------------|----|--------------|--------------------------------------|---|--------------|--------|---|--------------|----------|---|--------------|----------|---|--------------|-------------------|
| 283 | <b>postbup_gi</b><br><br><b>Show the field ONLY if:</b><br><b>[postbup_ss] = '1'</b>                                                                                                                                                                       | <b>Section Header: <i>Post-Bup GI Symptoms</i></b><br><br><b>Please review the entire clinical chart and note if any of the following gastrointestinal signs or symptoms were documented within 6 hours after first buprenorphine administration.</b> | <b>checkbox, Required</b><br><table border="1" data-bbox="1047 115 1542 472"> <tr> <td>1</td> <td>postbup_gi_1</td> <td>Constipation</td> </tr> <tr> <td>2</td> <td>postbup_gi_2</td> <td>Turning of stomach/cramping/abd pain</td> </tr> <tr> <td>3</td> <td>postbup_gi_3</td> <td>Nausea</td> </tr> <tr> <td>4</td> <td>postbup_gi_4</td> <td>Vomiting</td> </tr> <tr> <td>5</td> <td>postbup_gi_5</td> <td>Diarrhea</td> </tr> <tr> <td>0</td> <td>postbup_gi_0</td> <td>None of the above</td> </tr> </table> | 1 | postbup_gi_1 | Constipation | 2  | postbup_gi_2 | Turning of stomach/cramping/abd pain | 3 | postbup_gi_3 | Nausea | 4 | postbup_gi_4 | Vomiting | 5 | postbup_gi_5 | Diarrhea | 0 | postbup_gi_0 | None of the above |
| 1   | postbup_gi_1                                                                                                                                                                                                                                               | Constipation                                                                                                                                                                                                                                          |                                                                                                                                                                                                                                                                                                                                                                                                                                                                                                                   |   |              |              |    |              |                                      |   |              |        |   |              |          |   |              |          |   |              |                   |
| 2   | postbup_gi_2                                                                                                                                                                                                                                               | Turning of stomach/cramping/abd pain                                                                                                                                                                                                                  |                                                                                                                                                                                                                                                                                                                                                                                                                                                                                                                   |   |              |              |    |              |                                      |   |              |        |   |              |          |   |              |          |   |              |                   |
| 3   | postbup_gi_3                                                                                                                                                                                                                                               | Nausea                                                                                                                                                                                                                                                |                                                                                                                                                                                                                                                                                                                                                                                                                                                                                                                   |   |              |              |    |              |                                      |   |              |        |   |              |          |   |              |          |   |              |                   |
| 4   | postbup_gi_4                                                                                                                                                                                                                                               | Vomiting                                                                                                                                                                                                                                              |                                                                                                                                                                                                                                                                                                                                                                                                                                                                                                                   |   |              |              |    |              |                                      |   |              |        |   |              |          |   |              |          |   |              |                   |
| 5   | postbup_gi_5                                                                                                                                                                                                                                               | Diarrhea                                                                                                                                                                                                                                              |                                                                                                                                                                                                                                                                                                                                                                                                                                                                                                                   |   |              |              |    |              |                                      |   |              |        |   |              |          |   |              |          |   |              |                   |
| 0   | postbup_gi_0                                                                                                                                                                                                                                               | None of the above                                                                                                                                                                                                                                     |                                                                                                                                                                                                                                                                                                                                                                                                                                                                                                                   |   |              |              |    |              |                                      |   |              |        |   |              |          |   |              |          |   |              |                   |
| 284 | <b>constipation_time_yn</b><br><br><b>Show the field ONLY if:</b><br><b>[postbup_gi(1)] = '1'</b>                                                                                                                                                          | <b>Did the provider document the time(s) at which constipation was noted?</b>                                                                                                                                                                         | <b>yesno, Required</b><br><table border="1" data-bbox="1047 514 1144 609"> <tr> <td>1</td> <td>Yes</td> </tr> <tr> <td>0</td> <td>No</td> </tr> </table>                                                                                                                                                                                                                                                                                                                                                          | 1 | Yes          | 0            | No |              |                                      |   |              |        |   |              |          |   |              |          |   |              |                   |
| 1   | Yes                                                                                                                                                                                                                                                        |                                                                                                                                                                                                                                                       |                                                                                                                                                                                                                                                                                                                                                                                                                                                                                                                   |   |              |              |    |              |                                      |   |              |        |   |              |          |   |              |          |   |              |                   |
| 0   | No                                                                                                                                                                                                                                                         |                                                                                                                                                                                                                                                       |                                                                                                                                                                                                                                                                                                                                                                                                                                                                                                                   |   |              |              |    |              |                                      |   |              |        |   |              |          |   |              |          |   |              |                   |
| 285 | <b>constipation_num</b><br><br><b>Show the field ONLY if:</b><br><b>[constipation_time_yn] = '1'</b>                                                                                                                                                       | <b>How many instances of constipation were documented with timestamps within 6 hours after first buprenorphine administration?</b>                                                                                                                    | <b>radio, Required</b><br><table border="1" data-bbox="1047 661 1120 945"> <tr> <td>0</td> <td>0</td> </tr> <tr> <td>1</td> <td>1</td> </tr> <tr> <td>2</td> <td>2</td> </tr> <tr> <td>3</td> <td>3</td> </tr> <tr> <td>4</td> <td>4</td> </tr> <tr> <td>5</td> <td>5</td> </tr> </table>                                                                                                                                                                                                                         | 0 | 0            | 1            | 1  | 2            | 2                                    | 3 | 3            | 4      | 4 | 5            | 5        |   |              |          |   |              |                   |
| 0   | 0                                                                                                                                                                                                                                                          |                                                                                                                                                                                                                                                       |                                                                                                                                                                                                                                                                                                                                                                                                                                                                                                                   |   |              |              |    |              |                                      |   |              |        |   |              |          |   |              |          |   |              |                   |
| 1   | 1                                                                                                                                                                                                                                                          |                                                                                                                                                                                                                                                       |                                                                                                                                                                                                                                                                                                                                                                                                                                                                                                                   |   |              |              |    |              |                                      |   |              |        |   |              |          |   |              |          |   |              |                   |
| 2   | 2                                                                                                                                                                                                                                                          |                                                                                                                                                                                                                                                       |                                                                                                                                                                                                                                                                                                                                                                                                                                                                                                                   |   |              |              |    |              |                                      |   |              |        |   |              |          |   |              |          |   |              |                   |
| 3   | 3                                                                                                                                                                                                                                                          |                                                                                                                                                                                                                                                       |                                                                                                                                                                                                                                                                                                                                                                                                                                                                                                                   |   |              |              |    |              |                                      |   |              |        |   |              |          |   |              |          |   |              |                   |
| 4   | 4                                                                                                                                                                                                                                                          |                                                                                                                                                                                                                                                       |                                                                                                                                                                                                                                                                                                                                                                                                                                                                                                                   |   |              |              |    |              |                                      |   |              |        |   |              |          |   |              |          |   |              |                   |
| 5   | 5                                                                                                                                                                                                                                                          |                                                                                                                                                                                                                                                       |                                                                                                                                                                                                                                                                                                                                                                                                                                                                                                                   |   |              |              |    |              |                                      |   |              |        |   |              |          |   |              |          |   |              |                   |
| 286 | <b>constipation_time1</b><br><br><b>Show the field ONLY if:</b><br><b>[constipation_num] = '1'</b><br><b>or [constipation_num] = '2'</b><br><b>or [constipation_num] = '3'</b><br><b>or [constipation_num] = '4'</b><br><b>or [constipation_num] = '5'</b> | <b>Record the date and time of the first instance of constipation.</b>                                                                                                                                                                                | <b>text (datetime_mdy), Required</b>                                                                                                                                                                                                                                                                                                                                                                                                                                                                              |   |              |              |    |              |                                      |   |              |        |   |              |          |   |              |          |   |              |                   |
| 287 | <b>constipation_time2</b><br><br><b>Show the field ONLY if:</b><br><b>[constipation_num] = '2'</b><br><b>or [constipation_num] = '3'</b><br><b>or [constipation_num] = '4'</b><br><b>or [constipation_num] = '5'</b>                                       | <b>Record the date and time of the second instance of constipation.</b>                                                                                                                                                                               | <b>text (datetime_mdy), Required</b>                                                                                                                                                                                                                                                                                                                                                                                                                                                                              |   |              |              |    |              |                                      |   |              |        |   |              |          |   |              |          |   |              |                   |
| 288 | <b>constipation_time3</b><br><br><b>Show the field ONLY if:</b><br><b>[constipation_num] = '3'</b><br><b>or [constipation_num] = '4'</b><br><b>or [constipation_num] = '5'</b>                                                                             | <b>Record the date and time of the third instance of constipation.</b>                                                                                                                                                                                | <b>text (datetime_mdy), Required</b>                                                                                                                                                                                                                                                                                                                                                                                                                                                                              |   |              |              |    |              |                                      |   |              |        |   |              |          |   |              |          |   |              |                   |
| 289 | <b>constipation_time4</b><br><br><b>Show the field ONLY if:</b><br><b>[constipation_num] = '4'</b><br><b>or [constipation_num] = '5'</b>                                                                                                                   | <b>Record the date and time of the fourth instance of constipation.</b>                                                                                                                                                                               | <b>text (datetime_mdy), Required</b>                                                                                                                                                                                                                                                                                                                                                                                                                                                                              |   |              |              |    |              |                                      |   |              |        |   |              |          |   |              |          |   |              |                   |

|     |                                                                                                                                                                                |                                                                                                                                |                                                                                                                                                                                                                                                             |   |     |   |    |   |   |   |   |   |   |   |   |
|-----|--------------------------------------------------------------------------------------------------------------------------------------------------------------------------------|--------------------------------------------------------------------------------------------------------------------------------|-------------------------------------------------------------------------------------------------------------------------------------------------------------------------------------------------------------------------------------------------------------|---|-----|---|----|---|---|---|---|---|---|---|---|
| 290 | <b>constipation_time5</b><br>Show the field ONLY if:<br>[constipation_num] = '5'                                                                                               | Record the date and time of the fifth instance of constipation.                                                                | text (datetime_mdy), Required                                                                                                                                                                                                                               |   |     |   |    |   |   |   |   |   |   |   |   |
| 291 | <b>stomach_time_yn</b><br>Show the field ONLY if:<br>[postbup_gi(2)] = '1'                                                                                                     | Did the provider document the time(s) at which stomach turning (stomach cramps) was noted?                                     | <b>yesno, Required</b><br><table border="1"> <tr> <td>1</td> <td>Yes</td> </tr> <tr> <td>0</td> <td>No</td> </tr> </table>                                                                                                                                  | 1 | Yes | 0 | No |   |   |   |   |   |   |   |   |
| 1   | Yes                                                                                                                                                                            |                                                                                                                                |                                                                                                                                                                                                                                                             |   |     |   |    |   |   |   |   |   |   |   |   |
| 0   | No                                                                                                                                                                             |                                                                                                                                |                                                                                                                                                                                                                                                             |   |     |   |    |   |   |   |   |   |   |   |   |
| 292 | <b>stomach_num</b><br>Show the field ONLY if:<br>[stomach_time_yn] = '1'                                                                                                       | How many instances of stomach turning were documented with timestamps within 6 hours after first buprenorphine administration? | <b>radio, Required</b><br><table border="1"> <tr> <td>0</td> <td>0</td> </tr> <tr> <td>1</td> <td>1</td> </tr> <tr> <td>2</td> <td>2</td> </tr> <tr> <td>3</td> <td>3</td> </tr> <tr> <td>4</td> <td>4</td> </tr> <tr> <td>5</td> <td>5</td> </tr> </table> | 0 | 0   | 1 | 1  | 2 | 2 | 3 | 3 | 4 | 4 | 5 | 5 |
| 0   | 0                                                                                                                                                                              |                                                                                                                                |                                                                                                                                                                                                                                                             |   |     |   |    |   |   |   |   |   |   |   |   |
| 1   | 1                                                                                                                                                                              |                                                                                                                                |                                                                                                                                                                                                                                                             |   |     |   |    |   |   |   |   |   |   |   |   |
| 2   | 2                                                                                                                                                                              |                                                                                                                                |                                                                                                                                                                                                                                                             |   |     |   |    |   |   |   |   |   |   |   |   |
| 3   | 3                                                                                                                                                                              |                                                                                                                                |                                                                                                                                                                                                                                                             |   |     |   |    |   |   |   |   |   |   |   |   |
| 4   | 4                                                                                                                                                                              |                                                                                                                                |                                                                                                                                                                                                                                                             |   |     |   |    |   |   |   |   |   |   |   |   |
| 5   | 5                                                                                                                                                                              |                                                                                                                                |                                                                                                                                                                                                                                                             |   |     |   |    |   |   |   |   |   |   |   |   |
| 293 | <b>stomach_time1</b><br>Show the field ONLY if:<br>[stomach_num] = '1' or<br>[stomach_num] = '2' or<br>[stomach_num] = '3' or<br>[stomach_num] = '4' or<br>[stomach_num] = '5' | Record the date and time of the first instance of stomach turning.                                                             | text (datetime_mdy), Required                                                                                                                                                                                                                               |   |     |   |    |   |   |   |   |   |   |   |   |
| 294 | <b>stomach_time2</b><br>Show the field ONLY if:<br>[stomach_num] = '2' or<br>[stomach_num] = '3' or<br>[stomach_num] = '4' or<br>[stomach_num] = '5'                           | Record the date and time of the second instance of stomach turning.                                                            | text (datetime_mdy), Required                                                                                                                                                                                                                               |   |     |   |    |   |   |   |   |   |   |   |   |
| 295 | <b>stomach_time3</b><br>Show the field ONLY if:<br>[stomach_num] = '3' or<br>[stomach_num] = '4' or<br>[stomach_num] = '5'                                                     | Record the date and time of the third instance of stomach turning.                                                             | text (datetime_mdy), Required                                                                                                                                                                                                                               |   |     |   |    |   |   |   |   |   |   |   |   |
| 296 | <b>stomach_time4</b><br>Show the field ONLY if:<br>[stomach_num] = '4' or<br>[stomach_num] = '5'                                                                               | Record the date and time of the fourth instance of stomach turning.                                                            | text (datetime_mdy), Required                                                                                                                                                                                                                               |   |     |   |    |   |   |   |   |   |   |   |   |
| 297 | <b>stomach_time5</b><br>Show the field ONLY if:<br>[stomach_num] = '5'                                                                                                         | Record the date and time of the fifth instance of stomach turning.                                                             | text (datetime_mdy), Required                                                                                                                                                                                                                               |   |     |   |    |   |   |   |   |   |   |   |   |
| 298 | <b>nausea_time_yn</b><br>Show the field ONLY if:<br>[postbup_gi(3)] = '1'                                                                                                      | Did the provider document the time(s) at which nausea was noted?                                                               | <b>yesno, Required</b><br><table border="1"> <tr> <td>1</td> <td>Yes</td> </tr> <tr> <td>0</td> <td>No</td> </tr> </table>                                                                                                                                  | 1 | Yes | 0 | No |   |   |   |   |   |   |   |   |
| 1   | Yes                                                                                                                                                                            |                                                                                                                                |                                                                                                                                                                                                                                                             |   |     |   |    |   |   |   |   |   |   |   |   |
| 0   | No                                                                                                                                                                             |                                                                                                                                |                                                                                                                                                                                                                                                             |   |     |   |    |   |   |   |   |   |   |   |   |

|     |                                                                                                                                                                          |                                                                                                                                |                                                                                                                                                                                                                                        |   |     |   |    |   |   |   |   |   |   |   |   |
|-----|--------------------------------------------------------------------------------------------------------------------------------------------------------------------------|--------------------------------------------------------------------------------------------------------------------------------|----------------------------------------------------------------------------------------------------------------------------------------------------------------------------------------------------------------------------------------|---|-----|---|----|---|---|---|---|---|---|---|---|
| 299 | <p><b>nausea_num</b></p> <p>Show the field ONLY if:<br/>[nausea_time_yn] = '1'</p>                                                                                       | <p>How many instances of nausea were documented with timestamps within 6 hours after first buprenorphine administration?</p>   | <p>radio, Required</p> <table border="1"> <tr><td>0</td><td>0</td></tr> <tr><td>1</td><td>1</td></tr> <tr><td>2</td><td>2</td></tr> <tr><td>3</td><td>3</td></tr> <tr><td>4</td><td>4</td></tr> <tr><td>5</td><td>5</td></tr> </table> | 0 | 0   | 1 | 1  | 2 | 2 | 3 | 3 | 4 | 4 | 5 | 5 |
| 0   | 0                                                                                                                                                                        |                                                                                                                                |                                                                                                                                                                                                                                        |   |     |   |    |   |   |   |   |   |   |   |   |
| 1   | 1                                                                                                                                                                        |                                                                                                                                |                                                                                                                                                                                                                                        |   |     |   |    |   |   |   |   |   |   |   |   |
| 2   | 2                                                                                                                                                                        |                                                                                                                                |                                                                                                                                                                                                                                        |   |     |   |    |   |   |   |   |   |   |   |   |
| 3   | 3                                                                                                                                                                        |                                                                                                                                |                                                                                                                                                                                                                                        |   |     |   |    |   |   |   |   |   |   |   |   |
| 4   | 4                                                                                                                                                                        |                                                                                                                                |                                                                                                                                                                                                                                        |   |     |   |    |   |   |   |   |   |   |   |   |
| 5   | 5                                                                                                                                                                        |                                                                                                                                |                                                                                                                                                                                                                                        |   |     |   |    |   |   |   |   |   |   |   |   |
| 300 | <p><b>nausea_time1</b></p> <p>Show the field ONLY if:<br/>[nausea_num] = '1' or [nausea_num] = '2' or [nausea_num] = '3' or [nausea_num] = '4' or [nausea_num] = '5'</p> | <p>Record the date and time of the first instance of nausea.</p>                                                               | <p>text (datetime_mdy), Required</p>                                                                                                                                                                                                   |   |     |   |    |   |   |   |   |   |   |   |   |
| 301 | <p><b>nausea_time2</b></p> <p>Show the field ONLY if:<br/>[nausea_num] = '2' or [nausea_num] = '3' or [nausea_num] = '4' or [nausea_num] = '5'</p>                       | <p>Record the date and time of the second instance of nausea.</p>                                                              | <p>text (datetime_mdy), Required</p>                                                                                                                                                                                                   |   |     |   |    |   |   |   |   |   |   |   |   |
| 302 | <p><b>nausea_time3</b></p> <p>Show the field ONLY if:<br/>[nausea_num] = '3' or [nausea_num] = '4' or [nausea_num] = '5'</p>                                             | <p>Record the date and time of the third instance of nausea.</p>                                                               | <p>text (datetime_mdy), Required</p>                                                                                                                                                                                                   |   |     |   |    |   |   |   |   |   |   |   |   |
| 303 | <p><b>nausea_time4</b></p> <p>Show the field ONLY if:<br/>[nausea_num] = '4' or [nausea_num] = '5'</p>                                                                   | <p>Record the date and time of the fourth instance of nausea.</p>                                                              | <p>text (datetime_mdy), Required</p>                                                                                                                                                                                                   |   |     |   |    |   |   |   |   |   |   |   |   |
| 304 | <p><b>nausea_time5</b></p> <p>Show the field ONLY if:<br/>[nausea_num] = '5'</p>                                                                                         | <p>Record the date and time of the fifth instance of nausea.</p>                                                               | <p>text (datetime_mdy), Required</p>                                                                                                                                                                                                   |   |     |   |    |   |   |   |   |   |   |   |   |
| 305 | <p><b>vomit_time_yn</b></p> <p>Show the field ONLY if:<br/>[postbup_gi(4)] = '1'</p>                                                                                     | <p>Did the provider document the time(s) at which vomiting was noted?</p>                                                      | <p>yesno, Required</p> <table border="1"> <tr><td>1</td><td>Yes</td></tr> <tr><td>0</td><td>No</td></tr> </table>                                                                                                                      | 1 | Yes | 0 | No |   |   |   |   |   |   |   |   |
| 1   | Yes                                                                                                                                                                      |                                                                                                                                |                                                                                                                                                                                                                                        |   |     |   |    |   |   |   |   |   |   |   |   |
| 0   | No                                                                                                                                                                       |                                                                                                                                |                                                                                                                                                                                                                                        |   |     |   |    |   |   |   |   |   |   |   |   |
| 306 | <p><b>vomit_num</b></p> <p>Show the field ONLY if:<br/>[vomit_time_yn] = '1'</p>                                                                                         | <p>How many instances of vomiting were documented with timestamps within 6 hours after first buprenorphine administration?</p> | <p>radio, Required</p> <table border="1"> <tr><td>0</td><td>0</td></tr> <tr><td>1</td><td>1</td></tr> <tr><td>2</td><td>2</td></tr> <tr><td>3</td><td>3</td></tr> <tr><td>4</td><td>4</td></tr> <tr><td>5</td><td>5</td></tr> </table> | 0 | 0   | 1 | 1  | 2 | 2 | 3 | 3 | 4 | 4 | 5 | 5 |
| 0   | 0                                                                                                                                                                        |                                                                                                                                |                                                                                                                                                                                                                                        |   |     |   |    |   |   |   |   |   |   |   |   |
| 1   | 1                                                                                                                                                                        |                                                                                                                                |                                                                                                                                                                                                                                        |   |     |   |    |   |   |   |   |   |   |   |   |
| 2   | 2                                                                                                                                                                        |                                                                                                                                |                                                                                                                                                                                                                                        |   |     |   |    |   |   |   |   |   |   |   |   |
| 3   | 3                                                                                                                                                                        |                                                                                                                                |                                                                                                                                                                                                                                        |   |     |   |    |   |   |   |   |   |   |   |   |
| 4   | 4                                                                                                                                                                        |                                                                                                                                |                                                                                                                                                                                                                                        |   |     |   |    |   |   |   |   |   |   |   |   |
| 5   | 5                                                                                                                                                                        |                                                                                                                                |                                                                                                                                                                                                                                        |   |     |   |    |   |   |   |   |   |   |   |   |

|     |                                                                                                                                                                                 |                                                                                                                         |                                                                                                                                                                                                                                                             |   |     |   |    |   |   |   |   |   |   |   |   |
|-----|---------------------------------------------------------------------------------------------------------------------------------------------------------------------------------|-------------------------------------------------------------------------------------------------------------------------|-------------------------------------------------------------------------------------------------------------------------------------------------------------------------------------------------------------------------------------------------------------|---|-----|---|----|---|---|---|---|---|---|---|---|
| 307 | <b>vomit_time1</b><br><b>Show the field ONLY if:</b><br>[vomit_num] = '1' or [vomit_num] = '2' or [vomit_num] = '3' or [vomit_num] = '4' or [vomit_num] = '5'                   | Record the date and time of the first instance of vomiting.                                                             | text (datetime_mdy), Required                                                                                                                                                                                                                               |   |     |   |    |   |   |   |   |   |   |   |   |
| 308 | <b>vomit_time2</b><br><b>Show the field ONLY if:</b><br>[vomit_num] = '2' or [vomit_num] = '3' or [vomit_num] = '4' or [vomit_num] = '5'                                        | Record the date and time of the second instance of vomiting.                                                            | text (datetime_mdy), Required                                                                                                                                                                                                                               |   |     |   |    |   |   |   |   |   |   |   |   |
| 309 | <b>vomit_time3</b><br><b>Show the field ONLY if:</b><br>[vomit_num] = '3' or [vomit_num] = '4' or [vomit_num] = '5'                                                             | Record the date and time of the third instance of vomiting.                                                             | text (datetime_mdy), Required                                                                                                                                                                                                                               |   |     |   |    |   |   |   |   |   |   |   |   |
| 310 | <b>vomit_time4</b><br><b>Show the field ONLY if:</b><br>[vomit_num] = '4' or [vomit_num] = '5'                                                                                  | Record the date and time of the fourth instance of vomiting.                                                            | text (datetime_mdy), Required                                                                                                                                                                                                                               |   |     |   |    |   |   |   |   |   |   |   |   |
| 311 | <b>vomit_time5</b><br><b>Show the field ONLY if:</b><br>[vomit_num] = '5'                                                                                                       | Record the date and time of the fifth instance of vomiting.                                                             | text (datetime_mdy), Required                                                                                                                                                                                                                               |   |     |   |    |   |   |   |   |   |   |   |   |
| 312 | <b>diarrhea_time_yn</b><br><b>Show the field ONLY if:</b><br>[postbup_gi(5)] = '1'                                                                                              | Did the provider document the time(s) at which diarrhea was noted?                                                      | <b>yesno, Required</b><br><table border="1"> <tr> <td>1</td> <td>Yes</td> </tr> <tr> <td>0</td> <td>No</td> </tr> </table>                                                                                                                                  | 1 | Yes | 0 | No |   |   |   |   |   |   |   |   |
| 1   | Yes                                                                                                                                                                             |                                                                                                                         |                                                                                                                                                                                                                                                             |   |     |   |    |   |   |   |   |   |   |   |   |
| 0   | No                                                                                                                                                                              |                                                                                                                         |                                                                                                                                                                                                                                                             |   |     |   |    |   |   |   |   |   |   |   |   |
| 313 | <b>diarrhea_num</b><br><b>Show the field ONLY if:</b><br>[diarrhea_time_yn] = '1'                                                                                               | How many instances of diarrhea were documented with timestamps within 6 hours after first buprenorphine administration? | <b>radio, Required</b><br><table border="1"> <tr> <td>0</td> <td>0</td> </tr> <tr> <td>1</td> <td>1</td> </tr> <tr> <td>2</td> <td>2</td> </tr> <tr> <td>3</td> <td>3</td> </tr> <tr> <td>4</td> <td>4</td> </tr> <tr> <td>5</td> <td>5</td> </tr> </table> | 0 | 0   | 1 | 1  | 2 | 2 | 3 | 3 | 4 | 4 | 5 | 5 |
| 0   | 0                                                                                                                                                                               |                                                                                                                         |                                                                                                                                                                                                                                                             |   |     |   |    |   |   |   |   |   |   |   |   |
| 1   | 1                                                                                                                                                                               |                                                                                                                         |                                                                                                                                                                                                                                                             |   |     |   |    |   |   |   |   |   |   |   |   |
| 2   | 2                                                                                                                                                                               |                                                                                                                         |                                                                                                                                                                                                                                                             |   |     |   |    |   |   |   |   |   |   |   |   |
| 3   | 3                                                                                                                                                                               |                                                                                                                         |                                                                                                                                                                                                                                                             |   |     |   |    |   |   |   |   |   |   |   |   |
| 4   | 4                                                                                                                                                                               |                                                                                                                         |                                                                                                                                                                                                                                                             |   |     |   |    |   |   |   |   |   |   |   |   |
| 5   | 5                                                                                                                                                                               |                                                                                                                         |                                                                                                                                                                                                                                                             |   |     |   |    |   |   |   |   |   |   |   |   |
| 314 | <b>diarrhea_time1</b><br><b>Show the field ONLY if:</b><br>[diarrhea_num] = '1' or [diarrhea_num] = '2' or [diarrhea_num] = '3' or [diarrhea_num] = '4' or [diarrhea_num] = '5' | Record the date and time of the first instance of diarrhea.                                                             | text (datetime_mdy), Required                                                                                                                                                                                                                               |   |     |   |    |   |   |   |   |   |   |   |   |
| 315 | <b>diarrhea_time2</b><br><b>Show the field ONLY if:</b><br>[diarrhea_num] = '2' or [diarrhea_num] = '3' or [diarrhea_num] = '4' or [diarrhea_num] = '5'                         | Record the date and time of the second instance of diarrhea.                                                            | text (datetime_mdy), Required                                                                                                                                                                                                                               |   |     |   |    |   |   |   |   |   |   |   |   |

|     |                                                                                                                                                          |                                                                                                                                                                                                                                      |                                                                                                                                                                                                                                                                                                                                                                                                                                                  |   |                   |                                     |    |                   |             |   |                   |        |   |                   |              |   |                   |                   |
|-----|----------------------------------------------------------------------------------------------------------------------------------------------------------|--------------------------------------------------------------------------------------------------------------------------------------------------------------------------------------------------------------------------------------|--------------------------------------------------------------------------------------------------------------------------------------------------------------------------------------------------------------------------------------------------------------------------------------------------------------------------------------------------------------------------------------------------------------------------------------------------|---|-------------------|-------------------------------------|----|-------------------|-------------|---|-------------------|--------|---|-------------------|--------------|---|-------------------|-------------------|
| 316 | <b>diarrhea_time3</b><br>Show the field ONLY if:<br>[diarrhea_num] = '3' or<br>[diarrhea_num] = '4' or<br>[diarrhea_num] = '5'                           | Record the date and time of the third instance of diarrhea.                                                                                                                                                                          | text (datetime_mdy), Required                                                                                                                                                                                                                                                                                                                                                                                                                    |   |                   |                                     |    |                   |             |   |                   |        |   |                   |              |   |                   |                   |
| 317 | <b>diarrhea_time4</b><br>Show the field ONLY if:<br>[diarrhea_num] = '4' or<br>[diarrhea_num] = '5'                                                      | Record the date and time of the fourth instance of diarrhea.                                                                                                                                                                         | text (datetime_mdy), Required                                                                                                                                                                                                                                                                                                                                                                                                                    |   |                   |                                     |    |                   |             |   |                   |        |   |                   |              |   |                   |                   |
| 318 | <b>diarrhea_time5</b><br>Show the field ONLY if:<br>[diarrhea_num] = '5'                                                                                 | Record the date and time of the fifth instance of diarrhea.                                                                                                                                                                          | text (datetime_mdy), Required                                                                                                                                                                                                                                                                                                                                                                                                                    |   |                   |                                     |    |                   |             |   |                   |        |   |                   |              |   |                   |                   |
| 319 | <b>postbup_anxious</b><br>Show the field ONLY if:<br>[postbup_ss] = '1'                                                                                  | <b>Section Header:</b> <i>Post-Bup Anxiety</i><br><br>Please review the entire clinical chart and note if any of the following signs or symptoms of anxiety were documented within 6 hours after first buprenorphine administration. | <b>checkbox, Required</b><br><table border="1"> <tr> <td>1</td> <td>postbup_anxious_1</td> <td>Anxiety, irritability, or agitation</td> </tr> <tr> <td>2</td> <td>postbup_anxious_2</td> <td>Nervousness</td> </tr> <tr> <td>3</td> <td>postbup_anxious_3</td> <td>Tremor</td> </tr> <tr> <td>4</td> <td>postbup_anxious_4</td> <td>Restlessness</td> </tr> <tr> <td>0</td> <td>postbup_anxious_0</td> <td>None of the above</td> </tr> </table> | 1 | postbup_anxious_1 | Anxiety, irritability, or agitation | 2  | postbup_anxious_2 | Nervousness | 3 | postbup_anxious_3 | Tremor | 4 | postbup_anxious_4 | Restlessness | 0 | postbup_anxious_0 | None of the above |
| 1   | postbup_anxious_1                                                                                                                                        | Anxiety, irritability, or agitation                                                                                                                                                                                                  |                                                                                                                                                                                                                                                                                                                                                                                                                                                  |   |                   |                                     |    |                   |             |   |                   |        |   |                   |              |   |                   |                   |
| 2   | postbup_anxious_2                                                                                                                                        | Nervousness                                                                                                                                                                                                                          |                                                                                                                                                                                                                                                                                                                                                                                                                                                  |   |                   |                                     |    |                   |             |   |                   |        |   |                   |              |   |                   |                   |
| 3   | postbup_anxious_3                                                                                                                                        | Tremor                                                                                                                                                                                                                               |                                                                                                                                                                                                                                                                                                                                                                                                                                                  |   |                   |                                     |    |                   |             |   |                   |        |   |                   |              |   |                   |                   |
| 4   | postbup_anxious_4                                                                                                                                        | Restlessness                                                                                                                                                                                                                         |                                                                                                                                                                                                                                                                                                                                                                                                                                                  |   |                   |                                     |    |                   |             |   |                   |        |   |                   |              |   |                   |                   |
| 0   | postbup_anxious_0                                                                                                                                        | None of the above                                                                                                                                                                                                                    |                                                                                                                                                                                                                                                                                                                                                                                                                                                  |   |                   |                                     |    |                   |             |   |                   |        |   |                   |              |   |                   |                   |
| 320 | <b>anxiety_time_yn</b><br>Show the field ONLY if:<br>[postbup_anxious(1)] = '1'                                                                          | Did the provider document the time(s) at which anxiety, irritability, or agitation were noted?                                                                                                                                       | <b>yesno, Required</b><br><table border="1"> <tr> <td>1</td> <td>Yes</td> </tr> <tr> <td>0</td> <td>No</td> </tr> </table>                                                                                                                                                                                                                                                                                                                       | 1 | Yes               | 0                                   | No |                   |             |   |                   |        |   |                   |              |   |                   |                   |
| 1   | Yes                                                                                                                                                      |                                                                                                                                                                                                                                      |                                                                                                                                                                                                                                                                                                                                                                                                                                                  |   |                   |                                     |    |                   |             |   |                   |        |   |                   |              |   |                   |                   |
| 0   | No                                                                                                                                                       |                                                                                                                                                                                                                                      |                                                                                                                                                                                                                                                                                                                                                                                                                                                  |   |                   |                                     |    |                   |             |   |                   |        |   |                   |              |   |                   |                   |
| 321 | <b>anxiety_num</b><br>Show the field ONLY if:<br>[anxiety_time_yn] = '1'                                                                                 | How many instances of anxiety, irritability, or agitation were documented with timestamps within 6 hours after first buprenorphine administration?                                                                                   | <b>radio, Required</b><br><table border="1"> <tr> <td>0</td> <td>0</td> </tr> <tr> <td>1</td> <td>1</td> </tr> <tr> <td>2</td> <td>2</td> </tr> <tr> <td>3</td> <td>3</td> </tr> <tr> <td>4</td> <td>4</td> </tr> <tr> <td>5</td> <td>5</td> </tr> </table>                                                                                                                                                                                      | 0 | 0                 | 1                                   | 1  | 2                 | 2           | 3 | 3                 | 4      | 4 | 5                 | 5            |   |                   |                   |
| 0   | 0                                                                                                                                                        |                                                                                                                                                                                                                                      |                                                                                                                                                                                                                                                                                                                                                                                                                                                  |   |                   |                                     |    |                   |             |   |                   |        |   |                   |              |   |                   |                   |
| 1   | 1                                                                                                                                                        |                                                                                                                                                                                                                                      |                                                                                                                                                                                                                                                                                                                                                                                                                                                  |   |                   |                                     |    |                   |             |   |                   |        |   |                   |              |   |                   |                   |
| 2   | 2                                                                                                                                                        |                                                                                                                                                                                                                                      |                                                                                                                                                                                                                                                                                                                                                                                                                                                  |   |                   |                                     |    |                   |             |   |                   |        |   |                   |              |   |                   |                   |
| 3   | 3                                                                                                                                                        |                                                                                                                                                                                                                                      |                                                                                                                                                                                                                                                                                                                                                                                                                                                  |   |                   |                                     |    |                   |             |   |                   |        |   |                   |              |   |                   |                   |
| 4   | 4                                                                                                                                                        |                                                                                                                                                                                                                                      |                                                                                                                                                                                                                                                                                                                                                                                                                                                  |   |                   |                                     |    |                   |             |   |                   |        |   |                   |              |   |                   |                   |
| 5   | 5                                                                                                                                                        |                                                                                                                                                                                                                                      |                                                                                                                                                                                                                                                                                                                                                                                                                                                  |   |                   |                                     |    |                   |             |   |                   |        |   |                   |              |   |                   |                   |
| 322 | <b>anxiety_time1</b><br>Show the field ONLY if:<br>[anxiety_num]='1' or [anxiety_num]='2' or [anxiety_num]='3' or [anxiety_num]='4' or [anxiety_num]='5' | Record the date and time of the first instance of anxiety, irritability, or agitation.                                                                                                                                               | text (datetime_mdy), Required                                                                                                                                                                                                                                                                                                                                                                                                                    |   |                   |                                     |    |                   |             |   |                   |        |   |                   |              |   |                   |                   |
| 323 | <b>anxiety_time2</b><br>Show the field ONLY if:<br>[anxiety_num]='2' or [anxiety_num]='3' or [anxiety_num]='4' or [anxiety_num]='5'                      | Record the date and time of the second instance of anxiety, irritability, or agitation.                                                                                                                                              | text (datetime_mdy), Required                                                                                                                                                                                                                                                                                                                                                                                                                    |   |                   |                                     |    |                   |             |   |                   |        |   |                   |              |   |                   |                   |

|     |                                                                                                                                                                        |                                                                                                                                   |                                                                                                                                                                                                                                                             |   |     |   |    |   |   |   |   |   |   |   |   |
|-----|------------------------------------------------------------------------------------------------------------------------------------------------------------------------|-----------------------------------------------------------------------------------------------------------------------------------|-------------------------------------------------------------------------------------------------------------------------------------------------------------------------------------------------------------------------------------------------------------|---|-----|---|----|---|---|---|---|---|---|---|---|
| 324 | <b>anxiety_time3</b><br><b>Show the field ONLY if:</b><br><b>[anxiety_num]='3' or [anxiety_num]='4' or [anxiety_num]='5'</b>                                           | <b>Record the date and time of the third instance of anxiety, irritability, or agitation.</b>                                     | <b>text (datetime_mdy), Required</b>                                                                                                                                                                                                                        |   |     |   |    |   |   |   |   |   |   |   |   |
| 325 | <b>anxiety_time4</b><br><b>Show the field ONLY if:</b><br><b>[anxiety_num]='4' or [anxiety_num]='5'</b>                                                                | <b>Record the date and time of the fourth instance of anxiety, irritability, or agitation.</b>                                    | <b>text (datetime_mdy), Required</b>                                                                                                                                                                                                                        |   |     |   |    |   |   |   |   |   |   |   |   |
| 326 | <b>anxiety_time5</b><br><b>Show the field ONLY if:</b><br><b>[anxiety_num]='5'</b>                                                                                     | <b>Record the date and time of the fifth instance of anxiety, irritability, or agitation.</b>                                     | <b>text (datetime_mdy), Required</b>                                                                                                                                                                                                                        |   |     |   |    |   |   |   |   |   |   |   |   |
| 327 | <b>nervous_time_yn</b><br><b>Show the field ONLY if:</b><br><b>[postbup_anxious(2)]='1'</b>                                                                            | <b>Did the provider document the time(s) at which nervousness was noted?</b>                                                      | <b>yesno, Required</b><br><table border="1"> <tr> <td>1</td> <td>Yes</td> </tr> <tr> <td>0</td> <td>No</td> </tr> </table>                                                                                                                                  | 1 | Yes | 0 | No |   |   |   |   |   |   |   |   |
| 1   | Yes                                                                                                                                                                    |                                                                                                                                   |                                                                                                                                                                                                                                                             |   |     |   |    |   |   |   |   |   |   |   |   |
| 0   | No                                                                                                                                                                     |                                                                                                                                   |                                                                                                                                                                                                                                                             |   |     |   |    |   |   |   |   |   |   |   |   |
| 328 | <b>nervous_num</b><br><b>Show the field ONLY if:</b><br><b>[nervous_time_yn]='1'</b>                                                                                   | <b>How many instances of nervousness were documented with timestamps within 6 hours after first buprenorphine administration?</b> | <b>radio, Required</b><br><table border="1"> <tr> <td>0</td> <td>0</td> </tr> <tr> <td>1</td> <td>1</td> </tr> <tr> <td>2</td> <td>2</td> </tr> <tr> <td>3</td> <td>3</td> </tr> <tr> <td>4</td> <td>4</td> </tr> <tr> <td>5</td> <td>5</td> </tr> </table> | 0 | 0   | 1 | 1  | 2 | 2 | 3 | 3 | 4 | 4 | 5 | 5 |
| 0   | 0                                                                                                                                                                      |                                                                                                                                   |                                                                                                                                                                                                                                                             |   |     |   |    |   |   |   |   |   |   |   |   |
| 1   | 1                                                                                                                                                                      |                                                                                                                                   |                                                                                                                                                                                                                                                             |   |     |   |    |   |   |   |   |   |   |   |   |
| 2   | 2                                                                                                                                                                      |                                                                                                                                   |                                                                                                                                                                                                                                                             |   |     |   |    |   |   |   |   |   |   |   |   |
| 3   | 3                                                                                                                                                                      |                                                                                                                                   |                                                                                                                                                                                                                                                             |   |     |   |    |   |   |   |   |   |   |   |   |
| 4   | 4                                                                                                                                                                      |                                                                                                                                   |                                                                                                                                                                                                                                                             |   |     |   |    |   |   |   |   |   |   |   |   |
| 5   | 5                                                                                                                                                                      |                                                                                                                                   |                                                                                                                                                                                                                                                             |   |     |   |    |   |   |   |   |   |   |   |   |
| 329 | <b>nervous_time1</b><br><b>Show the field ONLY if:</b><br><b>[nervous_num]='1' or [nervous_num]='2' or [nervous_num]='3' or [nervous_num]='4' or [nervous_num]='5'</b> | <b>Record the date and time of the first instance of nervousness.</b>                                                             | <b>text (datetime_mdy), Required</b>                                                                                                                                                                                                                        |   |     |   |    |   |   |   |   |   |   |   |   |
| 330 | <b>nervous_time2</b><br><b>Show the field ONLY if:</b><br><b>[nervous_num]='2' or [nervous_num]='3' or [nervous_num]='4' or [nervous_num]='5'</b>                      | <b>Record the date and time of the second instance of nervousness.</b>                                                            | <b>text (datetime_mdy), Required</b>                                                                                                                                                                                                                        |   |     |   |    |   |   |   |   |   |   |   |   |
| 331 | <b>nervous_time3</b><br><b>Show the field ONLY if:</b><br><b>[nervous_num]='3' or [nervous_num]='4' or [nervous_num]='5'</b>                                           | <b>Record the date and time of the third instance of nervousness.</b>                                                             | <b>text (datetime_mdy), Required</b>                                                                                                                                                                                                                        |   |     |   |    |   |   |   |   |   |   |   |   |
| 332 | <b>nervous_time4</b><br><b>Show the field ONLY if:</b><br><b>[nervous_num]='4' or [nervous_num]='5'</b>                                                                | <b>Record the date and time of the fourth instance of nervousness.</b>                                                            | <b>text (datetime_mdy), Required</b>                                                                                                                                                                                                                        |   |     |   |    |   |   |   |   |   |   |   |   |

|     |                                                                                                                                                       |                                                                                                                       |                                                                                                                                                                                                                                                      |   |     |   |    |   |   |   |   |   |   |   |   |
|-----|-------------------------------------------------------------------------------------------------------------------------------------------------------|-----------------------------------------------------------------------------------------------------------------------|------------------------------------------------------------------------------------------------------------------------------------------------------------------------------------------------------------------------------------------------------|---|-----|---|----|---|---|---|---|---|---|---|---|
| 333 | nervous_time5<br>Show the field ONLY if:<br>[nervous_num] = '5'                                                                                       | Record the date and time of the fifth instance of nervousness.                                                        | text (datetime_mdy), Required                                                                                                                                                                                                                        |   |     |   |    |   |   |   |   |   |   |   |   |
| 334 | tremor_time_yn<br>Show the field ONLY if:<br>[postbup_anxious(3)] = '1'                                                                               | Did the provider document the time(s) at which tremor was noted?                                                      | yesno, Required<br><table border="1"> <tr> <td>1</td> <td>Yes</td> </tr> <tr> <td>0</td> <td>No</td> </tr> </table>                                                                                                                                  | 1 | Yes | 0 | No |   |   |   |   |   |   |   |   |
| 1   | Yes                                                                                                                                                   |                                                                                                                       |                                                                                                                                                                                                                                                      |   |     |   |    |   |   |   |   |   |   |   |   |
| 0   | No                                                                                                                                                    |                                                                                                                       |                                                                                                                                                                                                                                                      |   |     |   |    |   |   |   |   |   |   |   |   |
| 335 | tremor_num<br>Show the field ONLY if:<br>[tremor_time_yn] = '1'                                                                                       | How many instances of tremor were documented with timestamps within 6 hours after first buprenorphine administration? | radio, Required<br><table border="1"> <tr> <td>0</td> <td>0</td> </tr> <tr> <td>1</td> <td>1</td> </tr> <tr> <td>2</td> <td>2</td> </tr> <tr> <td>3</td> <td>3</td> </tr> <tr> <td>4</td> <td>4</td> </tr> <tr> <td>5</td> <td>5</td> </tr> </table> | 0 | 0   | 1 | 1  | 2 | 2 | 3 | 3 | 4 | 4 | 5 | 5 |
| 0   | 0                                                                                                                                                     |                                                                                                                       |                                                                                                                                                                                                                                                      |   |     |   |    |   |   |   |   |   |   |   |   |
| 1   | 1                                                                                                                                                     |                                                                                                                       |                                                                                                                                                                                                                                                      |   |     |   |    |   |   |   |   |   |   |   |   |
| 2   | 2                                                                                                                                                     |                                                                                                                       |                                                                                                                                                                                                                                                      |   |     |   |    |   |   |   |   |   |   |   |   |
| 3   | 3                                                                                                                                                     |                                                                                                                       |                                                                                                                                                                                                                                                      |   |     |   |    |   |   |   |   |   |   |   |   |
| 4   | 4                                                                                                                                                     |                                                                                                                       |                                                                                                                                                                                                                                                      |   |     |   |    |   |   |   |   |   |   |   |   |
| 5   | 5                                                                                                                                                     |                                                                                                                       |                                                                                                                                                                                                                                                      |   |     |   |    |   |   |   |   |   |   |   |   |
| 336 | tremor_time1<br>Show the field ONLY if:<br>[tremor_num] = '1' or [tremor_num] = '2' or [tremor_num] = '3' or [tremor_num] = '4' or [tremor_num] = '5' | Record the date and time of the first instance of tremor.<br><i>Enter military time (xx:xx).</i>                      | text (datetime_mdy), Required                                                                                                                                                                                                                        |   |     |   |    |   |   |   |   |   |   |   |   |
| 337 | tremor_time2<br>Show the field ONLY if:<br>[tremor_num] = '2' or [tremor_num] = '3' or [tremor_num] = '4' or [tremor_num] = '5'                       | Record the date and time of the second instance of tremor.                                                            | text (datetime_mdy), Required                                                                                                                                                                                                                        |   |     |   |    |   |   |   |   |   |   |   |   |
| 338 | tremor_time3<br>Show the field ONLY if:<br>[tremor_num] = '3' or [tremor_num] = '4' or [tremor_num] = '5'                                             | Record the date and time of the third instance of tremor.                                                             | text (datetime_mdy), Required                                                                                                                                                                                                                        |   |     |   |    |   |   |   |   |   |   |   |   |
| 339 | tremor_time4<br>Show the field ONLY if:<br>[tremor_num] = '4' or [tremor_num] = '5'                                                                   | Record the date and time of the fourth instance of tremor.                                                            | text (datetime_mdy), Required                                                                                                                                                                                                                        |   |     |   |    |   |   |   |   |   |   |   |   |
| 340 | tremor_time5<br>Show the field ONLY if:<br>[tremor_num] = '5'                                                                                         | Record the date and time of the fifth instance of tremor.                                                             | text (datetime_mdy), Required                                                                                                                                                                                                                        |   |     |   |    |   |   |   |   |   |   |   |   |
| 341 | restless_time_yn<br>Show the field ONLY if:<br>[postbup_anxious(4)] = '1'                                                                             | Did the provider document the time(s) at which restlessness was noted?                                                | yesno, Required<br><table border="1"> <tr> <td>1</td> <td>Yes</td> </tr> <tr> <td>0</td> <td>No</td> </tr> </table>                                                                                                                                  | 1 | Yes | 0 | No |   |   |   |   |   |   |   |   |
| 1   | Yes                                                                                                                                                   |                                                                                                                       |                                                                                                                                                                                                                                                      |   |     |   |    |   |   |   |   |   |   |   |   |
| 0   | No                                                                                                                                                    |                                                                                                                       |                                                                                                                                                                                                                                                      |   |     |   |    |   |   |   |   |   |   |   |   |

|     |                                                                                                                                                                                            |                                                                                                                                    |                                                                                                                                                                                                                                                                         |   |   |   |   |   |   |   |   |   |   |   |   |
|-----|--------------------------------------------------------------------------------------------------------------------------------------------------------------------------------------------|------------------------------------------------------------------------------------------------------------------------------------|-------------------------------------------------------------------------------------------------------------------------------------------------------------------------------------------------------------------------------------------------------------------------|---|---|---|---|---|---|---|---|---|---|---|---|
| 342 | <b>restless_num</b><br><br><b>Show the field ONLY if:</b><br><b>[restless_time_yn] = '1'</b>                                                                                               | <b>How many instances of restlessness were documented with timestamps within 6 hours after first buprenorphine administration?</b> | <b>radio, Required</b><br><table border="1" data-bbox="1047 115 1117 401"> <tr><td>0</td><td>0</td></tr> <tr><td>1</td><td>1</td></tr> <tr><td>2</td><td>2</td></tr> <tr><td>3</td><td>3</td></tr> <tr><td>4</td><td>4</td></tr> <tr><td>5</td><td>5</td></tr> </table> | 0 | 0 | 1 | 1 | 2 | 2 | 3 | 3 | 4 | 4 | 5 | 5 |
| 0   | 0                                                                                                                                                                                          |                                                                                                                                    |                                                                                                                                                                                                                                                                         |   |   |   |   |   |   |   |   |   |   |   |   |
| 1   | 1                                                                                                                                                                                          |                                                                                                                                    |                                                                                                                                                                                                                                                                         |   |   |   |   |   |   |   |   |   |   |   |   |
| 2   | 2                                                                                                                                                                                          |                                                                                                                                    |                                                                                                                                                                                                                                                                         |   |   |   |   |   |   |   |   |   |   |   |   |
| 3   | 3                                                                                                                                                                                          |                                                                                                                                    |                                                                                                                                                                                                                                                                         |   |   |   |   |   |   |   |   |   |   |   |   |
| 4   | 4                                                                                                                                                                                          |                                                                                                                                    |                                                                                                                                                                                                                                                                         |   |   |   |   |   |   |   |   |   |   |   |   |
| 5   | 5                                                                                                                                                                                          |                                                                                                                                    |                                                                                                                                                                                                                                                                         |   |   |   |   |   |   |   |   |   |   |   |   |
| 343 | <b>restless_time1</b><br><br><b>Show the field ONLY if:</b><br><b>[restless_num] = '1' or [restless_num] = '2' or [restless_num] = '3' or [restless_num] = '4' or [restless_num] = '5'</b> | <b>Record the date and time of the first instance of restlessness.</b>                                                             | <b>text (datetime_mdy), Required</b>                                                                                                                                                                                                                                    |   |   |   |   |   |   |   |   |   |   |   |   |
| 344 | <b>restless_time2</b><br><br><b>Show the field ONLY if:</b><br><b>[restless_num] = '2' or [restless_num] = '3' or [restless_num] = '4' or [restless_num] = '5'</b>                         | <b>Record the date and time of the second instance of restlessness.</b>                                                            | <b>text (datetime_mdy), Required</b>                                                                                                                                                                                                                                    |   |   |   |   |   |   |   |   |   |   |   |   |
| 345 | <b>restless_time3</b><br><br><b>Show the field ONLY if:</b><br><b>[restless_num] = '3' or [restless_num] = '4' or [restless_num] = '5'</b>                                                 | <b>Record the date and time of the third instance of restlessness.</b>                                                             | <b>text (datetime_mdy), Required</b>                                                                                                                                                                                                                                    |   |   |   |   |   |   |   |   |   |   |   |   |
| 346 | <b>restless_time4</b><br><br><b>Show the field ONLY if:</b><br><b>[restless_num] = '4' or [restless_num] = '5'</b>                                                                         | <b>Record the date and time of the fourth instance of restlessness.</b>                                                            | <b>text (datetime_mdy), Required</b>                                                                                                                                                                                                                                    |   |   |   |   |   |   |   |   |   |   |   |   |
| 347 | <b>restless_time5</b><br><br><b>Show the field ONLY if:</b><br><b>[restless_num] = '5'</b>                                                                                                 | <b>Record the date and time of the fifth instance of restlessness.</b>                                                             | <b>text (datetime_mdy), Required</b>                                                                                                                                                                                                                                    |   |   |   |   |   |   |   |   |   |   |   |   |



|     |                                                                                                                                                                                                                              |                                                                                                                                                                                                                                                   |                                                                                                                                                                                                                                                                                                                                                                                                                                                                                                                                                                                                                                                                                                                                                                                                                             |   |                      |         |    |                      |                                       |   |                      |            |   |                      |                        |   |                      |                                                 |   |                      |                                                        |   |                      |                                                |   |                      |                   |
|-----|------------------------------------------------------------------------------------------------------------------------------------------------------------------------------------------------------------------------------|---------------------------------------------------------------------------------------------------------------------------------------------------------------------------------------------------------------------------------------------------|-----------------------------------------------------------------------------------------------------------------------------------------------------------------------------------------------------------------------------------------------------------------------------------------------------------------------------------------------------------------------------------------------------------------------------------------------------------------------------------------------------------------------------------------------------------------------------------------------------------------------------------------------------------------------------------------------------------------------------------------------------------------------------------------------------------------------------|---|----------------------|---------|----|----------------------|---------------------------------------|---|----------------------|------------|---|----------------------|------------------------|---|----------------------|-------------------------------------------------|---|----------------------|--------------------------------------------------------|---|----------------------|------------------------------------------------|---|----------------------|-------------------|
| 348 | <b>postbup_withdrawal</b><br><br><b>Show the field ONLY if:</b><br><b>[postbup_ss] = '1'</b>                                                                                                                                 | <b>Section Header:</b> <i>Post-Bup Withdrawal</i><br><br><b>Please review the entire clinical chart and note if any of the following signs or symptoms of withdrawal were documented within 6 hours after first buprenorphine administration.</b> | <b>checkbox, Required</b><br><table border="1"> <tr> <td>1</td> <td>postbup_withdrawal_1</td> <td>Yawning</td> </tr> <tr> <td>2</td> <td>postbup_withdrawal_2</td> <td>Gooseflesh skin (chills/piloerection)</td> </tr> <tr> <td>3</td> <td>postbup_withdrawal_3</td> <td>Pulse &gt; 80</td> </tr> <tr> <td>4</td> <td>postbup_withdrawal_4</td> <td>Sweating (diaphoresis)</td> </tr> <tr> <td>5</td> <td>postbup_withdrawal_5</td> <td>Pupil size large or normal (dilation/mydriasis)</td> </tr> <tr> <td>6</td> <td>postbup_withdrawal_6</td> <td>Bone, joint aches or body aches (arthralgias/myalgias)</td> </tr> <tr> <td>7</td> <td>postbup_withdrawal_7</td> <td>Runny nose or tearing (rhinorrhea/lacrimation)</td> </tr> <tr> <td>0</td> <td>postbup_withdrawal_0</td> <td>None of the above</td> </tr> </table> | 1 | postbup_withdrawal_1 | Yawning | 2  | postbup_withdrawal_2 | Gooseflesh skin (chills/piloerection) | 3 | postbup_withdrawal_3 | Pulse > 80 | 4 | postbup_withdrawal_4 | Sweating (diaphoresis) | 5 | postbup_withdrawal_5 | Pupil size large or normal (dilation/mydriasis) | 6 | postbup_withdrawal_6 | Bone, joint aches or body aches (arthralgias/myalgias) | 7 | postbup_withdrawal_7 | Runny nose or tearing (rhinorrhea/lacrimation) | 0 | postbup_withdrawal_0 | None of the above |
| 1   | postbup_withdrawal_1                                                                                                                                                                                                         | Yawning                                                                                                                                                                                                                                           |                                                                                                                                                                                                                                                                                                                                                                                                                                                                                                                                                                                                                                                                                                                                                                                                                             |   |                      |         |    |                      |                                       |   |                      |            |   |                      |                        |   |                      |                                                 |   |                      |                                                        |   |                      |                                                |   |                      |                   |
| 2   | postbup_withdrawal_2                                                                                                                                                                                                         | Gooseflesh skin (chills/piloerection)                                                                                                                                                                                                             |                                                                                                                                                                                                                                                                                                                                                                                                                                                                                                                                                                                                                                                                                                                                                                                                                             |   |                      |         |    |                      |                                       |   |                      |            |   |                      |                        |   |                      |                                                 |   |                      |                                                        |   |                      |                                                |   |                      |                   |
| 3   | postbup_withdrawal_3                                                                                                                                                                                                         | Pulse > 80                                                                                                                                                                                                                                        |                                                                                                                                                                                                                                                                                                                                                                                                                                                                                                                                                                                                                                                                                                                                                                                                                             |   |                      |         |    |                      |                                       |   |                      |            |   |                      |                        |   |                      |                                                 |   |                      |                                                        |   |                      |                                                |   |                      |                   |
| 4   | postbup_withdrawal_4                                                                                                                                                                                                         | Sweating (diaphoresis)                                                                                                                                                                                                                            |                                                                                                                                                                                                                                                                                                                                                                                                                                                                                                                                                                                                                                                                                                                                                                                                                             |   |                      |         |    |                      |                                       |   |                      |            |   |                      |                        |   |                      |                                                 |   |                      |                                                        |   |                      |                                                |   |                      |                   |
| 5   | postbup_withdrawal_5                                                                                                                                                                                                         | Pupil size large or normal (dilation/mydriasis)                                                                                                                                                                                                   |                                                                                                                                                                                                                                                                                                                                                                                                                                                                                                                                                                                                                                                                                                                                                                                                                             |   |                      |         |    |                      |                                       |   |                      |            |   |                      |                        |   |                      |                                                 |   |                      |                                                        |   |                      |                                                |   |                      |                   |
| 6   | postbup_withdrawal_6                                                                                                                                                                                                         | Bone, joint aches or body aches (arthralgias/myalgias)                                                                                                                                                                                            |                                                                                                                                                                                                                                                                                                                                                                                                                                                                                                                                                                                                                                                                                                                                                                                                                             |   |                      |         |    |                      |                                       |   |                      |            |   |                      |                        |   |                      |                                                 |   |                      |                                                        |   |                      |                                                |   |                      |                   |
| 7   | postbup_withdrawal_7                                                                                                                                                                                                         | Runny nose or tearing (rhinorrhea/lacrimation)                                                                                                                                                                                                    |                                                                                                                                                                                                                                                                                                                                                                                                                                                                                                                                                                                                                                                                                                                                                                                                                             |   |                      |         |    |                      |                                       |   |                      |            |   |                      |                        |   |                      |                                                 |   |                      |                                                        |   |                      |                                                |   |                      |                   |
| 0   | postbup_withdrawal_0                                                                                                                                                                                                         | None of the above                                                                                                                                                                                                                                 |                                                                                                                                                                                                                                                                                                                                                                                                                                                                                                                                                                                                                                                                                                                                                                                                                             |   |                      |         |    |                      |                                       |   |                      |            |   |                      |                        |   |                      |                                                 |   |                      |                                                        |   |                      |                                                |   |                      |                   |
| 349 | <b>yawning_time_yn</b><br><br><b>Show the field ONLY if:</b><br><b>[postbup_withdrawal(1)] = '1'</b>                                                                                                                         | <b>Did the provider document the time(s) at which yawning was noted?</b>                                                                                                                                                                          | <b>yesno, Required</b><br><table border="1"> <tr> <td>1</td> <td>Yes</td> </tr> <tr> <td>0</td> <td>No</td> </tr> </table>                                                                                                                                                                                                                                                                                                                                                                                                                                                                                                                                                                                                                                                                                                  | 1 | Yes                  | 0       | No |                      |                                       |   |                      |            |   |                      |                        |   |                      |                                                 |   |                      |                                                        |   |                      |                                                |   |                      |                   |
| 1   | Yes                                                                                                                                                                                                                          |                                                                                                                                                                                                                                                   |                                                                                                                                                                                                                                                                                                                                                                                                                                                                                                                                                                                                                                                                                                                                                                                                                             |   |                      |         |    |                      |                                       |   |                      |            |   |                      |                        |   |                      |                                                 |   |                      |                                                        |   |                      |                                                |   |                      |                   |
| 0   | No                                                                                                                                                                                                                           |                                                                                                                                                                                                                                                   |                                                                                                                                                                                                                                                                                                                                                                                                                                                                                                                                                                                                                                                                                                                                                                                                                             |   |                      |         |    |                      |                                       |   |                      |            |   |                      |                        |   |                      |                                                 |   |                      |                                                        |   |                      |                                                |   |                      |                   |
| 350 | <b>yawning_num</b><br><br><b>Show the field ONLY if:</b><br><b>[yawning_time_yn] = '1'</b>                                                                                                                                   | <b>How many instances of yawning were documented with timestamps within 6 hours after first buprenorphine administration?</b>                                                                                                                     | <b>radio, Required</b><br><table border="1"> <tr> <td>0</td> <td>0</td> </tr> <tr> <td>1</td> <td>1</td> </tr> <tr> <td>2</td> <td>2</td> </tr> <tr> <td>3</td> <td>3</td> </tr> <tr> <td>4</td> <td>4</td> </tr> <tr> <td>5</td> <td>5</td> </tr> </table>                                                                                                                                                                                                                                                                                                                                                                                                                                                                                                                                                                 | 0 | 0                    | 1       | 1  | 2                    | 2                                     | 3 | 3                    | 4          | 4 | 5                    | 5                      |   |                      |                                                 |   |                      |                                                        |   |                      |                                                |   |                      |                   |
| 0   | 0                                                                                                                                                                                                                            |                                                                                                                                                                                                                                                   |                                                                                                                                                                                                                                                                                                                                                                                                                                                                                                                                                                                                                                                                                                                                                                                                                             |   |                      |         |    |                      |                                       |   |                      |            |   |                      |                        |   |                      |                                                 |   |                      |                                                        |   |                      |                                                |   |                      |                   |
| 1   | 1                                                                                                                                                                                                                            |                                                                                                                                                                                                                                                   |                                                                                                                                                                                                                                                                                                                                                                                                                                                                                                                                                                                                                                                                                                                                                                                                                             |   |                      |         |    |                      |                                       |   |                      |            |   |                      |                        |   |                      |                                                 |   |                      |                                                        |   |                      |                                                |   |                      |                   |
| 2   | 2                                                                                                                                                                                                                            |                                                                                                                                                                                                                                                   |                                                                                                                                                                                                                                                                                                                                                                                                                                                                                                                                                                                                                                                                                                                                                                                                                             |   |                      |         |    |                      |                                       |   |                      |            |   |                      |                        |   |                      |                                                 |   |                      |                                                        |   |                      |                                                |   |                      |                   |
| 3   | 3                                                                                                                                                                                                                            |                                                                                                                                                                                                                                                   |                                                                                                                                                                                                                                                                                                                                                                                                                                                                                                                                                                                                                                                                                                                                                                                                                             |   |                      |         |    |                      |                                       |   |                      |            |   |                      |                        |   |                      |                                                 |   |                      |                                                        |   |                      |                                                |   |                      |                   |
| 4   | 4                                                                                                                                                                                                                            |                                                                                                                                                                                                                                                   |                                                                                                                                                                                                                                                                                                                                                                                                                                                                                                                                                                                                                                                                                                                                                                                                                             |   |                      |         |    |                      |                                       |   |                      |            |   |                      |                        |   |                      |                                                 |   |                      |                                                        |   |                      |                                                |   |                      |                   |
| 5   | 5                                                                                                                                                                                                                            |                                                                                                                                                                                                                                                   |                                                                                                                                                                                                                                                                                                                                                                                                                                                                                                                                                                                                                                                                                                                                                                                                                             |   |                      |         |    |                      |                                       |   |                      |            |   |                      |                        |   |                      |                                                 |   |                      |                                                        |   |                      |                                                |   |                      |                   |
| 351 | <b>yawning_time1</b><br><br><b>Show the field ONLY if:</b><br><b>[yawning_num] = '1' or</b><br><b>[yawning_num] = '2' or</b><br><b>[yawning_num] = '3' or</b><br><b>[yawning_num] = '4' or</b><br><b>[yawning_num] = '5'</b> | <b>Record the date and time of the first instance of yawning.</b>                                                                                                                                                                                 | <b>text (datetime_mdy), Required</b>                                                                                                                                                                                                                                                                                                                                                                                                                                                                                                                                                                                                                                                                                                                                                                                        |   |                      |         |    |                      |                                       |   |                      |            |   |                      |                        |   |                      |                                                 |   |                      |                                                        |   |                      |                                                |   |                      |                   |
| 352 | <b>yawning_time2</b><br><br><b>Show the field ONLY if:</b><br><b>[yawning_num] = '2' or</b><br><b>[yawning_num] = '3' or</b><br><b>[yawning_num] = '4' or</b><br><b>[yawning_num] = '5'</b>                                  | <b>Record the date and time of the second instance of yawning.</b>                                                                                                                                                                                | <b>text (datetime_mdy), Required</b>                                                                                                                                                                                                                                                                                                                                                                                                                                                                                                                                                                                                                                                                                                                                                                                        |   |                      |         |    |                      |                                       |   |                      |            |   |                      |                        |   |                      |                                                 |   |                      |                                                        |   |                      |                                                |   |                      |                   |
| 353 | <b>yawning_time3</b><br><br><b>Show the field ONLY if:</b><br><b>[yawning_num] = '3' or</b><br><b>[yawning_num] = '4' or</b><br><b>[yawning_num] = '5'</b>                                                                   | <b>Record the date and time of the third instance of yawning.</b>                                                                                                                                                                                 | <b>text (datetime_mdy), Required</b>                                                                                                                                                                                                                                                                                                                                                                                                                                                                                                                                                                                                                                                                                                                                                                                        |   |                      |         |    |                      |                                       |   |                      |            |   |                      |                        |   |                      |                                                 |   |                      |                                                        |   |                      |                                                |   |                      |                   |

|     |                                                                                                                                                              |                                                                                                                       |                                                                                                                                                                                                                                                      |   |     |   |    |   |   |   |   |   |   |   |   |
|-----|--------------------------------------------------------------------------------------------------------------------------------------------------------------|-----------------------------------------------------------------------------------------------------------------------|------------------------------------------------------------------------------------------------------------------------------------------------------------------------------------------------------------------------------------------------------|---|-----|---|----|---|---|---|---|---|---|---|---|
| 354 | <b>yawning_time4</b><br>Show the field ONLY if:<br>[yawning_num] = '4' or<br>[yawning_num]='5'                                                               | Record the date and time of the fourth instance of yawning.                                                           | text (datetime_mdy), Required                                                                                                                                                                                                                        |   |     |   |    |   |   |   |   |   |   |   |   |
| 355 | <b>yawning_time5</b><br>Show the field ONLY if:<br>[yawning_num] = '5'                                                                                       | Record the date and time of the fifth instance of yawning.                                                            | text (datetime_mdy), Required                                                                                                                                                                                                                        |   |     |   |    |   |   |   |   |   |   |   |   |
| 356 | <b>chills_time_yn</b><br>Show the field ONLY if:<br>[postbup_withdrawal(2)] = '1'                                                                            | Did the provider document the time(s) at which gooseflesh skin (chills/piloerection) was noted?                       | yesno, Required<br><table border="1"> <tr> <td>1</td> <td>Yes</td> </tr> <tr> <td>0</td> <td>No</td> </tr> </table>                                                                                                                                  | 1 | Yes | 0 | No |   |   |   |   |   |   |   |   |
| 1   | Yes                                                                                                                                                          |                                                                                                                       |                                                                                                                                                                                                                                                      |   |     |   |    |   |   |   |   |   |   |   |   |
| 0   | No                                                                                                                                                           |                                                                                                                       |                                                                                                                                                                                                                                                      |   |     |   |    |   |   |   |   |   |   |   |   |
| 357 | <b>chills_num</b><br>Show the field ONLY if:<br>[chills_time_yn] = '1'                                                                                       | How many instances of chills were documented with timestamps within 6 hours after first buprenorphine administration? | radio, Required<br><table border="1"> <tr> <td>0</td> <td>0</td> </tr> <tr> <td>1</td> <td>1</td> </tr> <tr> <td>2</td> <td>2</td> </tr> <tr> <td>3</td> <td>3</td> </tr> <tr> <td>4</td> <td>4</td> </tr> <tr> <td>5</td> <td>5</td> </tr> </table> | 0 | 0   | 1 | 1  | 2 | 2 | 3 | 3 | 4 | 4 | 5 | 5 |
| 0   | 0                                                                                                                                                            |                                                                                                                       |                                                                                                                                                                                                                                                      |   |     |   |    |   |   |   |   |   |   |   |   |
| 1   | 1                                                                                                                                                            |                                                                                                                       |                                                                                                                                                                                                                                                      |   |     |   |    |   |   |   |   |   |   |   |   |
| 2   | 2                                                                                                                                                            |                                                                                                                       |                                                                                                                                                                                                                                                      |   |     |   |    |   |   |   |   |   |   |   |   |
| 3   | 3                                                                                                                                                            |                                                                                                                       |                                                                                                                                                                                                                                                      |   |     |   |    |   |   |   |   |   |   |   |   |
| 4   | 4                                                                                                                                                            |                                                                                                                       |                                                                                                                                                                                                                                                      |   |     |   |    |   |   |   |   |   |   |   |   |
| 5   | 5                                                                                                                                                            |                                                                                                                       |                                                                                                                                                                                                                                                      |   |     |   |    |   |   |   |   |   |   |   |   |
| 358 | <b>chills_time1</b><br>Show the field ONLY if:<br>[chills_num] = '1' or [chills_num] = '2' or [chills_num] = '3' or [chills_num] = '4' or [chills_num] = '5' | Record the date and time of the first instance of chills.                                                             | text (datetime_mdy), Required                                                                                                                                                                                                                        |   |     |   |    |   |   |   |   |   |   |   |   |
| 359 | <b>chills_time2</b><br>Show the field ONLY if:<br>[chills_num] = '2' or [chills_num] = '3' or [chills_num] = '4' or [chills_num] = '5'                       | Record the date and time of the second instance of chills.                                                            | text (datetime_mdy), Required                                                                                                                                                                                                                        |   |     |   |    |   |   |   |   |   |   |   |   |
| 360 | <b>chills_time3</b><br>Show the field ONLY if:<br>[chills_num] = '3' or [chills_num] = '4' or [chills_num] = '5'                                             | Record the date and time of the third instance of chills.                                                             | text (datetime_mdy), Required                                                                                                                                                                                                                        |   |     |   |    |   |   |   |   |   |   |   |   |
| 361 | <b>chills_time4</b><br>Show the field ONLY if:<br>[chills_num] = '4' or [chills_num] = '5'                                                                   | Record the date and time of the fourth instance of chills.                                                            | text (datetime_mdy), Required                                                                                                                                                                                                                        |   |     |   |    |   |   |   |   |   |   |   |   |
| 362 | <b>chills_time5</b><br>Show the field ONLY if:<br>[chills_num] = '5'                                                                                         | Record the date and time of the fifth instance of chills.                                                             | text (datetime_mdy), Required                                                                                                                                                                                                                        |   |     |   |    |   |   |   |   |   |   |   |   |
| 363 | <b>tachy_time_yn</b><br>Show the field ONLY if:<br>[postbup_withdrawal(3)] = '1'                                                                             | Did the provider document the time(s) at which a pulse > 80 bpm was noted?                                            | yesno, Required<br><table border="1"> <tr> <td>1</td> <td>Yes</td> </tr> <tr> <td>0</td> <td>No</td> </tr> </table>                                                                                                                                  | 1 | Yes | 0 | No |   |   |   |   |   |   |   |   |
| 1   | Yes                                                                                                                                                          |                                                                                                                       |                                                                                                                                                                                                                                                      |   |     |   |    |   |   |   |   |   |   |   |   |
| 0   | No                                                                                                                                                           |                                                                                                                       |                                                                                                                                                                                                                                                      |   |     |   |    |   |   |   |   |   |   |   |   |

|     |                                                                                                                                                        |                                                                                                                                 |                                                                                                                                                                                                                                           |   |     |   |    |   |   |   |   |   |   |   |   |
|-----|--------------------------------------------------------------------------------------------------------------------------------------------------------|---------------------------------------------------------------------------------------------------------------------------------|-------------------------------------------------------------------------------------------------------------------------------------------------------------------------------------------------------------------------------------------|---|-----|---|----|---|---|---|---|---|---|---|---|
| 364 | <b>tachy_num</b><br>Show the field ONLY if:<br>[tachy_time_yn] = '1'                                                                                   | How many instances of a pulse > 80 bpm were documented with timestamps within 6 hours after first buprenorphine administration? | <b>radio, Required</b><br><table border="1"> <tr><td>0</td><td>0</td></tr> <tr><td>1</td><td>1</td></tr> <tr><td>2</td><td>2</td></tr> <tr><td>3</td><td>3</td></tr> <tr><td>4</td><td>4</td></tr> <tr><td>5</td><td>5</td></tr> </table> | 0 | 0   | 1 | 1  | 2 | 2 | 3 | 3 | 4 | 4 | 5 | 5 |
| 0   | 0                                                                                                                                                      |                                                                                                                                 |                                                                                                                                                                                                                                           |   |     |   |    |   |   |   |   |   |   |   |   |
| 1   | 1                                                                                                                                                      |                                                                                                                                 |                                                                                                                                                                                                                                           |   |     |   |    |   |   |   |   |   |   |   |   |
| 2   | 2                                                                                                                                                      |                                                                                                                                 |                                                                                                                                                                                                                                           |   |     |   |    |   |   |   |   |   |   |   |   |
| 3   | 3                                                                                                                                                      |                                                                                                                                 |                                                                                                                                                                                                                                           |   |     |   |    |   |   |   |   |   |   |   |   |
| 4   | 4                                                                                                                                                      |                                                                                                                                 |                                                                                                                                                                                                                                           |   |     |   |    |   |   |   |   |   |   |   |   |
| 5   | 5                                                                                                                                                      |                                                                                                                                 |                                                                                                                                                                                                                                           |   |     |   |    |   |   |   |   |   |   |   |   |
| 365 | <b>tachy_time1</b><br>Show the field ONLY if:<br>[tachy_num] = '1' or [tachy_num] = '2' or [tachy_num] = '3' or [tachy_num] = '4' or [tachy_num] = '5' | Record the date and time of the first instance of pulse > 80 bpm.                                                               | <b>text (datetime_mdy), Required</b>                                                                                                                                                                                                      |   |     |   |    |   |   |   |   |   |   |   |   |
| 366 | <b>tachy_time2</b><br>Show the field ONLY if:<br>[tachy_num] = '2' or [tachy_num] = '3' or [tachy_num] = '4' or [tachy_num] = '5'                      | Record the date and time of the second instance of pulse > 80 bpm.                                                              | <b>text (datetime_mdy), Required</b>                                                                                                                                                                                                      |   |     |   |    |   |   |   |   |   |   |   |   |
| 367 | <b>tachy_time3</b><br>Show the field ONLY if:<br>[tachy_num] = '3' or [tachy_num] = '4' or [tachy_num] = '5'                                           | Record the date and time of the third instance of pulse > 80 bpm.                                                               | <b>text (datetime_mdy), Required</b>                                                                                                                                                                                                      |   |     |   |    |   |   |   |   |   |   |   |   |
| 368 | <b>tachy_time4</b><br>Show the field ONLY if:<br>[tachy_num] = '4' or [tachy_num] = '5'                                                                | Record the date and time of the fourth instance of pulse > 80 bpm.                                                              | <b>text (datetime_mdy), Required</b>                                                                                                                                                                                                      |   |     |   |    |   |   |   |   |   |   |   |   |
| 369 | <b>tachy_time5</b><br>Show the field ONLY if:<br>[tachy_num] = '5'                                                                                     | Record the date and time of the fifth instance of pulse > 80 bpm.                                                               | <b>text (datetime_mdy), Required</b>                                                                                                                                                                                                      |   |     |   |    |   |   |   |   |   |   |   |   |
| 370 | <b>sweat_time_yn</b><br>Show the field ONLY if:<br>[postbup_withdrawal(4)] = '1'                                                                       | Did the provider document the time(s) at which sweating was noted?                                                              | <b>yesno, Required</b><br><table border="1"> <tr><td>1</td><td>Yes</td></tr> <tr><td>0</td><td>No</td></tr> </table>                                                                                                                      | 1 | Yes | 0 | No |   |   |   |   |   |   |   |   |
| 1   | Yes                                                                                                                                                    |                                                                                                                                 |                                                                                                                                                                                                                                           |   |     |   |    |   |   |   |   |   |   |   |   |
| 0   | No                                                                                                                                                     |                                                                                                                                 |                                                                                                                                                                                                                                           |   |     |   |    |   |   |   |   |   |   |   |   |
| 371 | <b>sweat_num</b><br>Show the field ONLY if:<br>[sweat_time_yn] = '1'                                                                                   | How many instances of sweating were documented with timestamps within 6 hours after first buprenorphine administration?         | <b>radio, Required</b><br><table border="1"> <tr><td>0</td><td>0</td></tr> <tr><td>1</td><td>1</td></tr> <tr><td>2</td><td>2</td></tr> <tr><td>3</td><td>3</td></tr> <tr><td>4</td><td>4</td></tr> <tr><td>5</td><td>5</td></tr> </table> | 0 | 0   | 1 | 1  | 2 | 2 | 3 | 3 | 4 | 4 | 5 | 5 |
| 0   | 0                                                                                                                                                      |                                                                                                                                 |                                                                                                                                                                                                                                           |   |     |   |    |   |   |   |   |   |   |   |   |
| 1   | 1                                                                                                                                                      |                                                                                                                                 |                                                                                                                                                                                                                                           |   |     |   |    |   |   |   |   |   |   |   |   |
| 2   | 2                                                                                                                                                      |                                                                                                                                 |                                                                                                                                                                                                                                           |   |     |   |    |   |   |   |   |   |   |   |   |
| 3   | 3                                                                                                                                                      |                                                                                                                                 |                                                                                                                                                                                                                                           |   |     |   |    |   |   |   |   |   |   |   |   |
| 4   | 4                                                                                                                                                      |                                                                                                                                 |                                                                                                                                                                                                                                           |   |     |   |    |   |   |   |   |   |   |   |   |
| 5   | 5                                                                                                                                                      |                                                                                                                                 |                                                                                                                                                                                                                                           |   |     |   |    |   |   |   |   |   |   |   |   |

|     |                                                                                                                                                                                      |                                                                                                                               |                                                                                                                                                                                                                                                          |   |     |   |    |   |   |   |   |   |   |   |   |
|-----|--------------------------------------------------------------------------------------------------------------------------------------------------------------------------------------|-------------------------------------------------------------------------------------------------------------------------------|----------------------------------------------------------------------------------------------------------------------------------------------------------------------------------------------------------------------------------------------------------|---|-----|---|----|---|---|---|---|---|---|---|---|
| 372 | <p><b>sweat_time1</b></p> <p>Show the field ONLY if:<br/>[sweat_num] = '1' or [sweat_num] = '2' or [sweat_num] = '3' or [sweat_num] = '4' or [sweat_num] = '5'</p>                   | Record the date and time of the first instance of sweating.                                                                   | text (datetime_mdy), Required                                                                                                                                                                                                                            |   |     |   |    |   |   |   |   |   |   |   |   |
| 373 | <p><b>sweat_time2</b></p> <p>Show the field ONLY if:<br/>[sweat_num] = '2' or [sweat_num] = '3' or [sweat_num] = '4' or [sweat_num] = '5'</p>                                        | Record the date and time of the second instance of sweating.                                                                  | text (datetime_mdy), Required                                                                                                                                                                                                                            |   |     |   |    |   |   |   |   |   |   |   |   |
| 374 | <p><b>sweat_time3</b></p> <p>Show the field ONLY if:<br/>[sweat_num] = '3' or [sweat_num] = '4' or [sweat_num] = '5'</p>                                                             | Record the date and time of the third instance of sweating.                                                                   | text (datetime_mdy), Required                                                                                                                                                                                                                            |   |     |   |    |   |   |   |   |   |   |   |   |
| 375 | <p><b>sweat_time4</b></p> <p>Show the field ONLY if:<br/>[sweat_num] = '4' or [sweat_num] = '5'</p>                                                                                  | Record the date and time of the fourth instance of sweating.                                                                  | text (datetime_mdy), Required                                                                                                                                                                                                                            |   |     |   |    |   |   |   |   |   |   |   |   |
| 376 | <p><b>sweat_time5</b></p> <p>Show the field ONLY if:<br/>[sweat_num] = '5'</p>                                                                                                       | Record the date and time of the fifth instance of sweating.                                                                   | text (datetime_mdy), Required                                                                                                                                                                                                                            |   |     |   |    |   |   |   |   |   |   |   |   |
| 377 | <p><b>dilation_time_yn</b></p> <p>Show the field ONLY if:<br/>[postbup_withdrawal(5)] = '1'</p>                                                                                      | Did the provider document the time(s) at which pupil dilation (mydriasis) was noted?                                          | <p>yesno, Required</p> <table border="1"> <tr> <td>1</td> <td>Yes</td> </tr> <tr> <td>0</td> <td>No</td> </tr> </table>                                                                                                                                  | 1 | Yes | 0 | No |   |   |   |   |   |   |   |   |
| 1   | Yes                                                                                                                                                                                  |                                                                                                                               |                                                                                                                                                                                                                                                          |   |     |   |    |   |   |   |   |   |   |   |   |
| 0   | No                                                                                                                                                                                   |                                                                                                                               |                                                                                                                                                                                                                                                          |   |     |   |    |   |   |   |   |   |   |   |   |
| 378 | <p><b>dilation_num</b></p> <p>Show the field ONLY if:<br/>[dilation_time_yn] = '1'</p>                                                                                               | How many instances of pupil dilation were documented with timestamps within 6 hours after first buprenorphine administration? | <p>radio, Required</p> <table border="1"> <tr> <td>0</td> <td>0</td> </tr> <tr> <td>1</td> <td>1</td> </tr> <tr> <td>2</td> <td>2</td> </tr> <tr> <td>3</td> <td>3</td> </tr> <tr> <td>4</td> <td>4</td> </tr> <tr> <td>5</td> <td>5</td> </tr> </table> | 0 | 0   | 1 | 1  | 2 | 2 | 3 | 3 | 4 | 4 | 5 | 5 |
| 0   | 0                                                                                                                                                                                    |                                                                                                                               |                                                                                                                                                                                                                                                          |   |     |   |    |   |   |   |   |   |   |   |   |
| 1   | 1                                                                                                                                                                                    |                                                                                                                               |                                                                                                                                                                                                                                                          |   |     |   |    |   |   |   |   |   |   |   |   |
| 2   | 2                                                                                                                                                                                    |                                                                                                                               |                                                                                                                                                                                                                                                          |   |     |   |    |   |   |   |   |   |   |   |   |
| 3   | 3                                                                                                                                                                                    |                                                                                                                               |                                                                                                                                                                                                                                                          |   |     |   |    |   |   |   |   |   |   |   |   |
| 4   | 4                                                                                                                                                                                    |                                                                                                                               |                                                                                                                                                                                                                                                          |   |     |   |    |   |   |   |   |   |   |   |   |
| 5   | 5                                                                                                                                                                                    |                                                                                                                               |                                                                                                                                                                                                                                                          |   |     |   |    |   |   |   |   |   |   |   |   |
| 379 | <p><b>dilation_time1</b></p> <p>Show the field ONLY if:<br/>[dilation_num] = '1' or [dilation_num] = '2' or [dilation_num] = '3' or [dilation_num] = '4' or [dilation_num] = '5'</p> | Record the date and time of the first instance of pupil dilation.                                                             | text (datetime_mdy), Required                                                                                                                                                                                                                            |   |     |   |    |   |   |   |   |   |   |   |   |

|     |                                                                                                                                                                                 |                                                                    |                                                                                                                                |   |     |   |    |
|-----|---------------------------------------------------------------------------------------------------------------------------------------------------------------------------------|--------------------------------------------------------------------|--------------------------------------------------------------------------------------------------------------------------------|---|-----|---|----|
| 380 | <p><b>postbup_dilate_mm_1</b></p> <p>Show the field ONLY if:<br/>[dilation_num]='1' or [dilation_num]='2' or [dilation_num]='3' or [dilation_num]='4' or [dilation_num]='5'</p> | Pupil measurement listed?                                          | <p><b>yesno, Required</b></p> <table border="1"> <tr> <td>1</td> <td>Yes</td> </tr> <tr> <td>0</td> <td>No</td> </tr> </table> | 1 | Yes | 0 | No |
| 1   | Yes                                                                                                                                                                             |                                                                    |                                                                                                                                |   |     |   |    |
| 0   | No                                                                                                                                                                              |                                                                    |                                                                                                                                |   |     |   |    |
| 381 | <p><b>postbup_dilate_size_1</b></p> <p>Show the field ONLY if:<br/>[postbup_dilate_mm_1]='1'</p>                                                                                | Please enter the pupil size measured (in mm)                       | text, Required                                                                                                                 |   |     |   |    |
| 382 | <p><b>dilation_time2</b></p> <p>Show the field ONLY if:<br/>[dilation_num]='2' or [dilation_num]='3' or [dilation_num]='4' or [dilation_num]='5'</p>                            | Record the date and time of the second instance of pupil dilation. | text (datetime_mdy), Required                                                                                                  |   |     |   |    |
| 383 | <p><b>postbup_dilate_mm_2</b></p> <p>Show the field ONLY if:<br/>[dilation_num]='2' or [dilation_num]='3' or [dilation_num]='4' or [dilation_num]='5'</p>                       | Pupil measurement listed?                                          | <p><b>yesno, Required</b></p> <table border="1"> <tr> <td>1</td> <td>Yes</td> </tr> <tr> <td>0</td> <td>No</td> </tr> </table> | 1 | Yes | 0 | No |
| 1   | Yes                                                                                                                                                                             |                                                                    |                                                                                                                                |   |     |   |    |
| 0   | No                                                                                                                                                                              |                                                                    |                                                                                                                                |   |     |   |    |
| 384 | <p><b>postbup_dilate_size_2</b></p> <p>Show the field ONLY if:<br/>[postbup_dilate_mm_2]='1'</p>                                                                                | Please enter the pupil size measured (in mm)                       | text, Required                                                                                                                 |   |     |   |    |
| 385 | <p><b>dilation_time3</b></p> <p>Show the field ONLY if:<br/>[dilation_num]='3' or [dilation_num]='4' or [dilation_num]='5'</p>                                                  | Record the date and time of the third instance of pupil dilation.  | text (datetime_mdy), Required                                                                                                  |   |     |   |    |
| 386 | <p><b>postbup_dilate_mm_3</b></p> <p>Show the field ONLY if:<br/>[dilation_num]='3' or [dilation_num]='4' or [dilation_num]='5'</p>                                             | Pupil measurement listed?                                          | <p><b>yesno, Required</b></p> <table border="1"> <tr> <td>1</td> <td>Yes</td> </tr> <tr> <td>0</td> <td>No</td> </tr> </table> | 1 | Yes | 0 | No |
| 1   | Yes                                                                                                                                                                             |                                                                    |                                                                                                                                |   |     |   |    |
| 0   | No                                                                                                                                                                              |                                                                    |                                                                                                                                |   |     |   |    |
| 387 | <p><b>postbup_dilate_size_3</b></p> <p>Show the field ONLY if:<br/>[postbup_dilate_mm_3]='1'</p>                                                                                | Please enter the pupil size measured (in mm)                       | text, Required                                                                                                                 |   |     |   |    |
| 388 | <p><b>dilation_time4</b></p> <p>Show the field ONLY if:<br/>[dilation_num]='4' or [dilation_num]='5'</p>                                                                        | Record the date and time of the fourth instance of pupil dilation. | text (datetime_mdy), Required                                                                                                  |   |     |   |    |
| 389 | <p><b>postbup_dilate_mm_4</b></p> <p>Show the field ONLY if:<br/>[dilation_num]='4' or [dilation_num]='5'</p>                                                                   | Pupil measurement listed?                                          | <p><b>yesno, Required</b></p> <table border="1"> <tr> <td>1</td> <td>Yes</td> </tr> <tr> <td>0</td> <td>No</td> </tr> </table> | 1 | Yes | 0 | No |
| 1   | Yes                                                                                                                                                                             |                                                                    |                                                                                                                                |   |     |   |    |
| 0   | No                                                                                                                                                                              |                                                                    |                                                                                                                                |   |     |   |    |

|     |                                                                                                                                                        |                                                                                                                                           |                                                                                                                                                                                                                                                      |   |     |   |    |   |   |   |   |   |   |   |   |
|-----|--------------------------------------------------------------------------------------------------------------------------------------------------------|-------------------------------------------------------------------------------------------------------------------------------------------|------------------------------------------------------------------------------------------------------------------------------------------------------------------------------------------------------------------------------------------------------|---|-----|---|----|---|---|---|---|---|---|---|---|
| 390 | <b>postbup_dilate_size_4</b><br>Show the field ONLY if:<br>[postbup_dilate_mm_4]<br>= '1'                                                              | Please enter the pupil size measured (in mm)                                                                                              | text, Required                                                                                                                                                                                                                                       |   |     |   |    |   |   |   |   |   |   |   |   |
| 391 | <b>dilation_time5</b><br>Show the field ONLY if:<br>[dilation_num] = '5'                                                                               | Record the date and time of the fifth instance of pupil dilation.                                                                         | text (datetime_mdy), Required                                                                                                                                                                                                                        |   |     |   |    |   |   |   |   |   |   |   |   |
| 392 | <b>postbup_dilate_mm_5</b><br>Show the field ONLY if:<br>[dilation_num] = '5'                                                                          | Pupil measurement listed?                                                                                                                 | yesno, Required<br><table border="1"> <tr> <td>1</td> <td>Yes</td> </tr> <tr> <td>0</td> <td>No</td> </tr> </table>                                                                                                                                  | 1 | Yes | 0 | No |   |   |   |   |   |   |   |   |
| 1   | Yes                                                                                                                                                    |                                                                                                                                           |                                                                                                                                                                                                                                                      |   |     |   |    |   |   |   |   |   |   |   |   |
| 0   | No                                                                                                                                                     |                                                                                                                                           |                                                                                                                                                                                                                                                      |   |     |   |    |   |   |   |   |   |   |   |   |
| 393 | <b>postbup_dilate_size_5</b><br>Show the field ONLY if:<br>[postbup_dilate_mm_5]<br>= '1'                                                              | Please enter the pupil size measured (in mm)                                                                                              | text, Required                                                                                                                                                                                                                                       |   |     |   |    |   |   |   |   |   |   |   |   |
| 394 | <b>aches_time_yn</b><br>Show the field ONLY if:<br>[postbup_withdrawal(6)]<br>= '1'                                                                    | Did the provider document the time(s) at which bone, joint, or body aches were noted?                                                     | yesno, Required<br><table border="1"> <tr> <td>1</td> <td>Yes</td> </tr> <tr> <td>0</td> <td>No</td> </tr> </table>                                                                                                                                  | 1 | Yes | 0 | No |   |   |   |   |   |   |   |   |
| 1   | Yes                                                                                                                                                    |                                                                                                                                           |                                                                                                                                                                                                                                                      |   |     |   |    |   |   |   |   |   |   |   |   |
| 0   | No                                                                                                                                                     |                                                                                                                                           |                                                                                                                                                                                                                                                      |   |     |   |    |   |   |   |   |   |   |   |   |
| 395 | <b>aches_num</b><br>Show the field ONLY if:<br>[aches_time_yn] = '1'                                                                                   | How many instances of bone, joint, or body aches were documented with timestamps within 6 hours after first buprenorphine administration? | radio, Required<br><table border="1"> <tr> <td>0</td> <td>0</td> </tr> <tr> <td>1</td> <td>1</td> </tr> <tr> <td>2</td> <td>2</td> </tr> <tr> <td>3</td> <td>3</td> </tr> <tr> <td>4</td> <td>4</td> </tr> <tr> <td>5</td> <td>5</td> </tr> </table> | 0 | 0   | 1 | 1  | 2 | 2 | 3 | 3 | 4 | 4 | 5 | 5 |
| 0   | 0                                                                                                                                                      |                                                                                                                                           |                                                                                                                                                                                                                                                      |   |     |   |    |   |   |   |   |   |   |   |   |
| 1   | 1                                                                                                                                                      |                                                                                                                                           |                                                                                                                                                                                                                                                      |   |     |   |    |   |   |   |   |   |   |   |   |
| 2   | 2                                                                                                                                                      |                                                                                                                                           |                                                                                                                                                                                                                                                      |   |     |   |    |   |   |   |   |   |   |   |   |
| 3   | 3                                                                                                                                                      |                                                                                                                                           |                                                                                                                                                                                                                                                      |   |     |   |    |   |   |   |   |   |   |   |   |
| 4   | 4                                                                                                                                                      |                                                                                                                                           |                                                                                                                                                                                                                                                      |   |     |   |    |   |   |   |   |   |   |   |   |
| 5   | 5                                                                                                                                                      |                                                                                                                                           |                                                                                                                                                                                                                                                      |   |     |   |    |   |   |   |   |   |   |   |   |
| 396 | <b>aches_time1</b><br>Show the field ONLY if:<br>[aches_num] = '1' or [aches_num] = '2' or [aches_num] = '3' or [aches_num] = '4' or [aches_num] = '5' | Record the date and time of the first instance of bone, joint, or body aches.                                                             | text (datetime_mdy), Required                                                                                                                                                                                                                        |   |     |   |    |   |   |   |   |   |   |   |   |
| 397 | <b>aches_time2</b><br>Show the field ONLY if:<br>[aches_num] = '2' or [aches_num] = '3' or [aches_num] = '4' or [aches_num] = '5'                      | Record the date and time of the second instance of bone, joint, or body aches.                                                            | text (datetime_mdy), Required                                                                                                                                                                                                                        |   |     |   |    |   |   |   |   |   |   |   |   |
| 398 | <b>aches_time3</b><br>Show the field ONLY if:<br>[aches_num] = '3' or [aches_num] = '4' or [aches_num] = '5'                                           | Record the date and time of the third instance of bone, joint, or body aches.                                                             | text (datetime_mdy), Required                                                                                                                                                                                                                        |   |     |   |    |   |   |   |   |   |   |   |   |
| 399 | <b>aches_time4</b><br>Show the field ONLY if:<br>[aches_num] = '4' or [aches_num] = '5'                                                                | Record the date and time of the fourth instance of bone, joint, or body aches.                                                            | text (datetime_mdy), Required                                                                                                                                                                                                                        |   |     |   |    |   |   |   |   |   |   |   |   |

|     |                                                                                                                                       |                                                                                                                                                                                                                                |                                                                                                                                                                                                                                                                                                                                                                                                              |   |                  |         |    |                  |             |   |                  |             |   |                  |             |   |                  |                   |
|-----|---------------------------------------------------------------------------------------------------------------------------------------|--------------------------------------------------------------------------------------------------------------------------------------------------------------------------------------------------------------------------------|--------------------------------------------------------------------------------------------------------------------------------------------------------------------------------------------------------------------------------------------------------------------------------------------------------------------------------------------------------------------------------------------------------------|---|------------------|---------|----|------------------|-------------|---|------------------|-------------|---|------------------|-------------|---|------------------|-------------------|
| 400 | aches_time5<br>Show the field ONLY if:<br>[aches_num] = '5'                                                                           | Record the date and time of the fifth instance of bone, joint, or body aches.                                                                                                                                                  | text (datetime_mdy), Required                                                                                                                                                                                                                                                                                                                                                                                |   |                  |         |    |                  |             |   |                  |             |   |                  |             |   |                  |                   |
| 401 | teary_time_yn<br>Show the field ONLY if:<br>[postbup_withdrawal(7)] = '1'                                                             | Did the provider document the time(s) at which a runny nose or tearing (rhinorrhea or lacrimation) were noted?                                                                                                                 | yesno, Required<br><table border="1"> <tr> <td>1</td> <td>Yes</td> </tr> <tr> <td>0</td> <td>No</td> </tr> </table>                                                                                                                                                                                                                                                                                          | 1 | Yes              | 0       | No |                  |             |   |                  |             |   |                  |             |   |                  |                   |
| 1   | Yes                                                                                                                                   |                                                                                                                                                                                                                                |                                                                                                                                                                                                                                                                                                                                                                                                              |   |                  |         |    |                  |             |   |                  |             |   |                  |             |   |                  |                   |
| 0   | No                                                                                                                                    |                                                                                                                                                                                                                                |                                                                                                                                                                                                                                                                                                                                                                                                              |   |                  |         |    |                  |             |   |                  |             |   |                  |             |   |                  |                   |
| 402 | teary_num<br>Show the field ONLY if:<br>[teary_time_yn] = '1'                                                                         | How many instances of a runny nose or tearing were documented with timestamps within 6 hours after first buprenorphine administration?                                                                                         | radio, Required<br><table border="1"> <tr> <td>0</td> <td>0</td> </tr> <tr> <td>1</td> <td>1</td> </tr> <tr> <td>2</td> <td>2</td> </tr> <tr> <td>3</td> <td>3</td> </tr> <tr> <td>4</td> <td>4</td> </tr> <tr> <td>5</td> <td>5</td> </tr> </table>                                                                                                                                                         | 0 | 0                | 1       | 1  | 2                | 2           | 3 | 3                | 4           | 4 | 5                | 5           |   |                  |                   |
| 0   | 0                                                                                                                                     |                                                                                                                                                                                                                                |                                                                                                                                                                                                                                                                                                                                                                                                              |   |                  |         |    |                  |             |   |                  |             |   |                  |             |   |                  |                   |
| 1   | 1                                                                                                                                     |                                                                                                                                                                                                                                |                                                                                                                                                                                                                                                                                                                                                                                                              |   |                  |         |    |                  |             |   |                  |             |   |                  |             |   |                  |                   |
| 2   | 2                                                                                                                                     |                                                                                                                                                                                                                                |                                                                                                                                                                                                                                                                                                                                                                                                              |   |                  |         |    |                  |             |   |                  |             |   |                  |             |   |                  |                   |
| 3   | 3                                                                                                                                     |                                                                                                                                                                                                                                |                                                                                                                                                                                                                                                                                                                                                                                                              |   |                  |         |    |                  |             |   |                  |             |   |                  |             |   |                  |                   |
| 4   | 4                                                                                                                                     |                                                                                                                                                                                                                                |                                                                                                                                                                                                                                                                                                                                                                                                              |   |                  |         |    |                  |             |   |                  |             |   |                  |             |   |                  |                   |
| 5   | 5                                                                                                                                     |                                                                                                                                                                                                                                |                                                                                                                                                                                                                                                                                                                                                                                                              |   |                  |         |    |                  |             |   |                  |             |   |                  |             |   |                  |                   |
| 403 | teary_time1<br>Show the field ONLY if:<br>[teary_num]='1' or [teary_num]='2' or [teary_num]='3' or [teary_num]='4' or [teary_num]='5' | Record the date and time of the first instance of a runny nose or tearing.                                                                                                                                                     | text (datetime_mdy), Required                                                                                                                                                                                                                                                                                                                                                                                |   |                  |         |    |                  |             |   |                  |             |   |                  |             |   |                  |                   |
| 404 | teary_time2<br>Show the field ONLY if:<br>[teary_num]='2' or [teary_num]='3' or [teary_num]='4' or [teary_num]='5'                    | Record the date and time of the second instance of a runny nose or tearing.                                                                                                                                                    | text (datetime_mdy), Required                                                                                                                                                                                                                                                                                                                                                                                |   |                  |         |    |                  |             |   |                  |             |   |                  |             |   |                  |                   |
| 405 | teary_time3<br>Show the field ONLY if:<br>[teary_num]='3' or [teary_num]='4' or [teary_num]='5'                                       | Record the date and time of the third instance of a runny nose or tearing.                                                                                                                                                     | text (datetime_mdy), Required                                                                                                                                                                                                                                                                                                                                                                                |   |                  |         |    |                  |             |   |                  |             |   |                  |             |   |                  |                   |
| 406 | teary_time4<br>Show the field ONLY if:<br>[teary_num]='4' or [teary_num]='5'                                                          | Record the date and time of the fourth instance of a runny nose or tearing.                                                                                                                                                    | text (datetime_mdy), Required                                                                                                                                                                                                                                                                                                                                                                                |   |                  |         |    |                  |             |   |                  |             |   |                  |             |   |                  |                   |
| 407 | teary_time5<br>Show the field ONLY if:<br>[teary_num] = '5'                                                                           | Record the date and time of the fifth instance of a runny nose or tearing.                                                                                                                                                     | text (datetime_mdy), Required                                                                                                                                                                                                                                                                                                                                                                                |   |                  |         |    |                  |             |   |                  |             |   |                  |             |   |                  |                   |
| 408 | postbup_vitals<br>Show the field ONLY if:<br>[postbup_ss] = '1'                                                                       | Section Header: <i>Post-Bup Abnormal Vital Signs</i><br>Please review the entire clinical chart and note if any of the following abnormal vital signs were documented within 6 hours after first buprenorphine administration. | checkbox, Required<br><table border="1"> <tr> <td>1</td> <td>postbup_vitals_1</td> <td>Hypoxia</td> </tr> <tr> <td>2</td> <td>postbup_vitals_2</td> <td>Hypercarbia</td> </tr> <tr> <td>3</td> <td>postbup_vitals_3</td> <td>Hypotension</td> </tr> <tr> <td>4</td> <td>postbup_vitals_4</td> <td>Bradycardia</td> </tr> <tr> <td>0</td> <td>postbup_vitals_0</td> <td>None of the above</td> </tr> </table> | 1 | postbup_vitals_1 | Hypoxia | 2  | postbup_vitals_2 | Hypercarbia | 3 | postbup_vitals_3 | Hypotension | 4 | postbup_vitals_4 | Bradycardia | 0 | postbup_vitals_0 | None of the above |
| 1   | postbup_vitals_1                                                                                                                      | Hypoxia                                                                                                                                                                                                                        |                                                                                                                                                                                                                                                                                                                                                                                                              |   |                  |         |    |                  |             |   |                  |             |   |                  |             |   |                  |                   |
| 2   | postbup_vitals_2                                                                                                                      | Hypercarbia                                                                                                                                                                                                                    |                                                                                                                                                                                                                                                                                                                                                                                                              |   |                  |         |    |                  |             |   |                  |             |   |                  |             |   |                  |                   |
| 3   | postbup_vitals_3                                                                                                                      | Hypotension                                                                                                                                                                                                                    |                                                                                                                                                                                                                                                                                                                                                                                                              |   |                  |         |    |                  |             |   |                  |             |   |                  |             |   |                  |                   |
| 4   | postbup_vitals_4                                                                                                                      | Bradycardia                                                                                                                                                                                                                    |                                                                                                                                                                                                                                                                                                                                                                                                              |   |                  |         |    |                  |             |   |                  |             |   |                  |             |   |                  |                   |
| 0   | postbup_vitals_0                                                                                                                      | None of the above                                                                                                                                                                                                              |                                                                                                                                                                                                                                                                                                                                                                                                              |   |                  |         |    |                  |             |   |                  |             |   |                  |             |   |                  |                   |

|     |                                                                                                                                                                                                |                                                                                                                                   |                                                                                                                                                                                                                                                                 |   |     |   |    |   |   |   |   |   |   |   |   |
|-----|------------------------------------------------------------------------------------------------------------------------------------------------------------------------------------------------|-----------------------------------------------------------------------------------------------------------------------------------|-----------------------------------------------------------------------------------------------------------------------------------------------------------------------------------------------------------------------------------------------------------------|---|-----|---|----|---|---|---|---|---|---|---|---|
| 409 | <p><b>hypoxia_time_yn</b></p> <p>Show the field ONLY if:<br/>[postbup_vitals(1)] = '1'</p>                                                                                                     | <p>Did the provider document the time(s) at which hypoxia was noted?</p>                                                          | <p><b>yesno, Required</b></p> <table border="1"> <tr> <td>1</td> <td>Yes</td> </tr> <tr> <td>0</td> <td>No</td> </tr> </table>                                                                                                                                  | 1 | Yes | 0 | No |   |   |   |   |   |   |   |   |
| 1   | Yes                                                                                                                                                                                            |                                                                                                                                   |                                                                                                                                                                                                                                                                 |   |     |   |    |   |   |   |   |   |   |   |   |
| 0   | No                                                                                                                                                                                             |                                                                                                                                   |                                                                                                                                                                                                                                                                 |   |     |   |    |   |   |   |   |   |   |   |   |
| 410 | <p><b>hypoxia_num</b></p> <p>Show the field ONLY if:<br/>[hypoxia_time_yn] = '1'</p>                                                                                                           | <p>How many instances of hypoxia were documented with timestamps within 6 hours after first buprenorphine administration?</p>     | <p><b>radio, Required</b></p> <table border="1"> <tr> <td>0</td> <td>0</td> </tr> <tr> <td>1</td> <td>1</td> </tr> <tr> <td>2</td> <td>2</td> </tr> <tr> <td>3</td> <td>3</td> </tr> <tr> <td>4</td> <td>4</td> </tr> <tr> <td>5</td> <td>5</td> </tr> </table> | 0 | 0   | 1 | 1  | 2 | 2 | 3 | 3 | 4 | 4 | 5 | 5 |
| 0   | 0                                                                                                                                                                                              |                                                                                                                                   |                                                                                                                                                                                                                                                                 |   |     |   |    |   |   |   |   |   |   |   |   |
| 1   | 1                                                                                                                                                                                              |                                                                                                                                   |                                                                                                                                                                                                                                                                 |   |     |   |    |   |   |   |   |   |   |   |   |
| 2   | 2                                                                                                                                                                                              |                                                                                                                                   |                                                                                                                                                                                                                                                                 |   |     |   |    |   |   |   |   |   |   |   |   |
| 3   | 3                                                                                                                                                                                              |                                                                                                                                   |                                                                                                                                                                                                                                                                 |   |     |   |    |   |   |   |   |   |   |   |   |
| 4   | 4                                                                                                                                                                                              |                                                                                                                                   |                                                                                                                                                                                                                                                                 |   |     |   |    |   |   |   |   |   |   |   |   |
| 5   | 5                                                                                                                                                                                              |                                                                                                                                   |                                                                                                                                                                                                                                                                 |   |     |   |    |   |   |   |   |   |   |   |   |
| 411 | <p><b>hypoxia_time1</b></p> <p>Show the field ONLY if:<br/>[hypoxia_num] = '1' or<br/>[hypoxia_num] = '2' or<br/>[hypoxia_num] = '3' or<br/>[hypoxia_num] = '4' or<br/>[hypoxia_num] = '5'</p> | <p>Record the date and time of the first instance of hypoxia.</p>                                                                 | <p><b>text (datetime_mdy), Required</b></p>                                                                                                                                                                                                                     |   |     |   |    |   |   |   |   |   |   |   |   |
| 412 | <p><b>hypoxia_time2</b></p> <p>Show the field ONLY if:<br/>[hypoxia_num] = '2' or<br/>[hypoxia_num] = '3' or<br/>[hypoxia_num] = '4' or<br/>[hypoxia_num] = '5'</p>                            | <p>Record the date and time of the second instance of hypoxia.</p>                                                                | <p><b>text (datetime_mdy), Required</b></p>                                                                                                                                                                                                                     |   |     |   |    |   |   |   |   |   |   |   |   |
| 413 | <p><b>hypoxia_time3</b></p> <p>Show the field ONLY if:<br/>[hypoxia_num] = '3' or<br/>[hypoxia_num] = '4' or<br/>[hypoxia_num] = '5'</p>                                                       | <p>Record the date and time of the third instance of hypoxia.</p>                                                                 | <p><b>text (datetime_mdy), Required</b></p>                                                                                                                                                                                                                     |   |     |   |    |   |   |   |   |   |   |   |   |
| 414 | <p><b>hypoxia_time4</b></p> <p>Show the field ONLY if:<br/>[hypoxia_num] = '4' or<br/>[hypoxia_num] = '5'</p>                                                                                  | <p>Record the date and time of the fourth instance of hypoxia.</p>                                                                | <p><b>text (datetime_mdy), Required</b></p>                                                                                                                                                                                                                     |   |     |   |    |   |   |   |   |   |   |   |   |
| 415 | <p><b>hypoxia_time5</b></p> <p>Show the field ONLY if:<br/>[hypoxia_num] = '5'</p>                                                                                                             | <p>Record the date and time of the fifth instance of hypoxia.</p>                                                                 | <p><b>text (datetime_mdy), Required</b></p>                                                                                                                                                                                                                     |   |     |   |    |   |   |   |   |   |   |   |   |
| 416 | <p><b>co2_time_yn</b></p> <p>Show the field ONLY if:<br/>[postbup_vitals(2)] = '1'</p>                                                                                                         | <p>Did the provider document the time(s) at which hypercarbia was noted?</p>                                                      | <p><b>yesno, Required</b></p> <table border="1"> <tr> <td>1</td> <td>Yes</td> </tr> <tr> <td>0</td> <td>No</td> </tr> </table>                                                                                                                                  | 1 | Yes | 0 | No |   |   |   |   |   |   |   |   |
| 1   | Yes                                                                                                                                                                                            |                                                                                                                                   |                                                                                                                                                                                                                                                                 |   |     |   |    |   |   |   |   |   |   |   |   |
| 0   | No                                                                                                                                                                                             |                                                                                                                                   |                                                                                                                                                                                                                                                                 |   |     |   |    |   |   |   |   |   |   |   |   |
| 417 | <p><b>co2_num</b></p> <p>Show the field ONLY if:<br/>[co2_time_yn] = '1'</p>                                                                                                                   | <p>How many instances of hypercarbia were documented with timestamps within 6 hours after first buprenorphine administration?</p> | <p><b>radio, Required</b></p> <table border="1"> <tr> <td>0</td> <td>0</td> </tr> <tr> <td>1</td> <td>1</td> </tr> <tr> <td>2</td> <td>2</td> </tr> <tr> <td>3</td> <td>3</td> </tr> <tr> <td>4</td> <td>4</td> </tr> <tr> <td>5</td> <td>5</td> </tr> </table> | 0 | 0   | 1 | 1  | 2 | 2 | 3 | 3 | 4 | 4 | 5 | 5 |
| 0   | 0                                                                                                                                                                                              |                                                                                                                                   |                                                                                                                                                                                                                                                                 |   |     |   |    |   |   |   |   |   |   |   |   |
| 1   | 1                                                                                                                                                                                              |                                                                                                                                   |                                                                                                                                                                                                                                                                 |   |     |   |    |   |   |   |   |   |   |   |   |
| 2   | 2                                                                                                                                                                                              |                                                                                                                                   |                                                                                                                                                                                                                                                                 |   |     |   |    |   |   |   |   |   |   |   |   |
| 3   | 3                                                                                                                                                                                              |                                                                                                                                   |                                                                                                                                                                                                                                                                 |   |     |   |    |   |   |   |   |   |   |   |   |
| 4   | 4                                                                                                                                                                                              |                                                                                                                                   |                                                                                                                                                                                                                                                                 |   |     |   |    |   |   |   |   |   |   |   |   |
| 5   | 5                                                                                                                                                                                              |                                                                                                                                   |                                                                                                                                                                                                                                                                 |   |     |   |    |   |   |   |   |   |   |   |   |



|     |                                                                                                                                        |                                                                                                                            |                                                                                                                                                                                                                                                             |   |     |   |    |   |   |   |   |   |   |   |   |
|-----|----------------------------------------------------------------------------------------------------------------------------------------|----------------------------------------------------------------------------------------------------------------------------|-------------------------------------------------------------------------------------------------------------------------------------------------------------------------------------------------------------------------------------------------------------|---|-----|---|----|---|---|---|---|---|---|---|---|
| 418 | <b>co2_time1</b><br>Show the field ONLY if:<br>[co2_num]='1' or [co2_num]='2' or [co2_num]='3' or [co2_num]='4' or [co2_num]='5'       | Record the date and time of the first instance of hypercarbia.                                                             | text (datetime_mdy), Required                                                                                                                                                                                                                               |   |     |   |    |   |   |   |   |   |   |   |   |
| 419 | <b>co2_time2</b><br>Show the field ONLY if:<br>[co2_num]='2' or [co2_num]='3' or [co2_num]='4' or [co2_num]='5'                        | Record the date and time of the second instance of hypercarbia.                                                            | text (datetime_mdy), Required                                                                                                                                                                                                                               |   |     |   |    |   |   |   |   |   |   |   |   |
| 420 | <b>co2_time3</b><br>Show the field ONLY if:<br>[co2_num]='3' or [co2_num]='4' or [co2_num]='5'                                         | Record the date and time of the third instance of hypercarbia.                                                             | text (datetime_mdy), Required                                                                                                                                                                                                                               |   |     |   |    |   |   |   |   |   |   |   |   |
| 421 | <b>co2_time4</b><br>Show the field ONLY if:<br>[co2_num]='4' or [co2_num]='5'                                                          | Record the date and time of the fourth instance of hypercarbia.                                                            | text (datetime_mdy), Required                                                                                                                                                                                                                               |   |     |   |    |   |   |   |   |   |   |   |   |
| 422 | <b>co2_time5</b><br>Show the field ONLY if:<br>[co2_num]='5'                                                                           | Record the date and time of the fifth instance of hypercarbia.                                                             | text (datetime_mdy), Required                                                                                                                                                                                                                               |   |     |   |    |   |   |   |   |   |   |   |   |
| 423 | <b>hypo_time_yn</b><br>Show the field ONLY if:<br>[postbup_vitals(3)] = '1'                                                            | Did the provider document the time(s) at which hypotension was noted?                                                      | <b>yesno, Required</b><br><table border="1"> <tr> <td>1</td> <td>Yes</td> </tr> <tr> <td>0</td> <td>No</td> </tr> </table>                                                                                                                                  | 1 | Yes | 0 | No |   |   |   |   |   |   |   |   |
| 1   | Yes                                                                                                                                    |                                                                                                                            |                                                                                                                                                                                                                                                             |   |     |   |    |   |   |   |   |   |   |   |   |
| 0   | No                                                                                                                                     |                                                                                                                            |                                                                                                                                                                                                                                                             |   |     |   |    |   |   |   |   |   |   |   |   |
| 424 | <b>hypo_num</b><br>Show the field ONLY if:<br>[hypo_time_yn] = '1'                                                                     | How many instances of hypotension were documented with timestamps within 6 hours after first buprenorphine administration? | <b>radio, Required</b><br><table border="1"> <tr> <td>0</td> <td>0</td> </tr> <tr> <td>1</td> <td>1</td> </tr> <tr> <td>2</td> <td>2</td> </tr> <tr> <td>3</td> <td>3</td> </tr> <tr> <td>4</td> <td>4</td> </tr> <tr> <td>5</td> <td>5</td> </tr> </table> | 0 | 0   | 1 | 1  | 2 | 2 | 3 | 3 | 4 | 4 | 5 | 5 |
| 0   | 0                                                                                                                                      |                                                                                                                            |                                                                                                                                                                                                                                                             |   |     |   |    |   |   |   |   |   |   |   |   |
| 1   | 1                                                                                                                                      |                                                                                                                            |                                                                                                                                                                                                                                                             |   |     |   |    |   |   |   |   |   |   |   |   |
| 2   | 2                                                                                                                                      |                                                                                                                            |                                                                                                                                                                                                                                                             |   |     |   |    |   |   |   |   |   |   |   |   |
| 3   | 3                                                                                                                                      |                                                                                                                            |                                                                                                                                                                                                                                                             |   |     |   |    |   |   |   |   |   |   |   |   |
| 4   | 4                                                                                                                                      |                                                                                                                            |                                                                                                                                                                                                                                                             |   |     |   |    |   |   |   |   |   |   |   |   |
| 5   | 5                                                                                                                                      |                                                                                                                            |                                                                                                                                                                                                                                                             |   |     |   |    |   |   |   |   |   |   |   |   |
| 425 | <b>hypo_time1</b><br>Show the field ONLY if:<br>[hypo_num]='1' or [hypo_num]='2' or [hypo_num]='3' or [hypo_num]='4' or [hypo_num]='5' | Record the date and time of the first instance of hypotension.                                                             | text (datetime_mdy), Required                                                                                                                                                                                                                               |   |     |   |    |   |   |   |   |   |   |   |   |
| 426 | <b>hypo_time2</b><br>Show the field ONLY if:<br>[hypo_num]='2' or [hypo_num]='3' or [hypo_num]='4' or [hypo_num]='5'                   | Record the date and time of the second instance of hypotension.                                                            | text (datetime_mdy), Required                                                                                                                                                                                                                               |   |     |   |    |   |   |   |   |   |   |   |   |

|     |                                                                                                                                                        |                                                                                                                            |                                                                                                                                                                                                                                                             |   |     |   |    |   |   |   |   |   |   |   |   |
|-----|--------------------------------------------------------------------------------------------------------------------------------------------------------|----------------------------------------------------------------------------------------------------------------------------|-------------------------------------------------------------------------------------------------------------------------------------------------------------------------------------------------------------------------------------------------------------|---|-----|---|----|---|---|---|---|---|---|---|---|
| 427 | <b>hypo_time3</b><br>Show the field ONLY if:<br>[hypo_num] = '3' or [hypo_num] = '4' or [hypo_num] = '5'                                               | Record the date and time of the third instance of hypotension.                                                             | text (datetime_mdy), Required                                                                                                                                                                                                                               |   |     |   |    |   |   |   |   |   |   |   |   |
| 428 | <b>hypo_time4</b><br>Show the field ONLY if:<br>[hypo_num] = '4' or [hypo_num] = '5'                                                                   | Record the date and time of the fourth instance of hypotension.                                                            | text (datetime_mdy), Required                                                                                                                                                                                                                               |   |     |   |    |   |   |   |   |   |   |   |   |
| 429 | <b>hypo_time5</b><br>Show the field ONLY if:<br>[hypo_num] = '5'                                                                                       | Record the date and time of the fifth instance of hypotension.                                                             | text (datetime_mdy), Required                                                                                                                                                                                                                               |   |     |   |    |   |   |   |   |   |   |   |   |
| 430 | <b>brady_time_yn</b><br>Show the field ONLY if:<br>[postbup_vitals(4)] = '1'                                                                           | Did the provider document the time(s) at which bradycardia was noted?                                                      | <b>yesno, Required</b><br><table border="1"> <tr> <td>1</td> <td>Yes</td> </tr> <tr> <td>0</td> <td>No</td> </tr> </table>                                                                                                                                  | 1 | Yes | 0 | No |   |   |   |   |   |   |   |   |
| 1   | Yes                                                                                                                                                    |                                                                                                                            |                                                                                                                                                                                                                                                             |   |     |   |    |   |   |   |   |   |   |   |   |
| 0   | No                                                                                                                                                     |                                                                                                                            |                                                                                                                                                                                                                                                             |   |     |   |    |   |   |   |   |   |   |   |   |
| 431 | <b>brady_num</b><br>Show the field ONLY if:<br>[brady_time_yn] = '1'                                                                                   | How many instances of bradycardia were documented with timestamps within 6 hours after first buprenorphine administration? | <b>radio, Required</b><br><table border="1"> <tr> <td>0</td> <td>0</td> </tr> <tr> <td>1</td> <td>1</td> </tr> <tr> <td>2</td> <td>2</td> </tr> <tr> <td>3</td> <td>3</td> </tr> <tr> <td>4</td> <td>4</td> </tr> <tr> <td>5</td> <td>5</td> </tr> </table> | 0 | 0   | 1 | 1  | 2 | 2 | 3 | 3 | 4 | 4 | 5 | 5 |
| 0   | 0                                                                                                                                                      |                                                                                                                            |                                                                                                                                                                                                                                                             |   |     |   |    |   |   |   |   |   |   |   |   |
| 1   | 1                                                                                                                                                      |                                                                                                                            |                                                                                                                                                                                                                                                             |   |     |   |    |   |   |   |   |   |   |   |   |
| 2   | 2                                                                                                                                                      |                                                                                                                            |                                                                                                                                                                                                                                                             |   |     |   |    |   |   |   |   |   |   |   |   |
| 3   | 3                                                                                                                                                      |                                                                                                                            |                                                                                                                                                                                                                                                             |   |     |   |    |   |   |   |   |   |   |   |   |
| 4   | 4                                                                                                                                                      |                                                                                                                            |                                                                                                                                                                                                                                                             |   |     |   |    |   |   |   |   |   |   |   |   |
| 5   | 5                                                                                                                                                      |                                                                                                                            |                                                                                                                                                                                                                                                             |   |     |   |    |   |   |   |   |   |   |   |   |
| 432 | <b>brady_time1</b><br>Show the field ONLY if:<br>[brady_num] = '1' or [brady_num] = '2' or [brady_num] = '3' or [brady_num] = '4' or [brady_num] = '5' | Record the date and time of the first instance of bradycardia.                                                             | text (datetime_mdy), Required                                                                                                                                                                                                                               |   |     |   |    |   |   |   |   |   |   |   |   |
| 433 | <b>brady_time2</b><br>Show the field ONLY if:<br>[brady_num] = '2' or [brady_num] = '3' or [brady_num] = '4' or [brady_num] = '5'                      | Record the date and time of the second instance of bradycardia.                                                            | text (datetime_mdy), Required                                                                                                                                                                                                                               |   |     |   |    |   |   |   |   |   |   |   |   |
| 434 | <b>brady_time3</b><br>Show the field ONLY if:<br>[brady_num] = '3' or [brady_num] = '4' or [brady_num] = '5'                                           | Record the date and time of the third instance of bradycardia.                                                             | text (datetime_mdy), Required                                                                                                                                                                                                                               |   |     |   |    |   |   |   |   |   |   |   |   |
| 435 | <b>brady_time4</b><br>Show the field ONLY if:<br>[brady_num] = '4' or [brady_num] = '5'                                                                | Record the date and time of the fourth instance of bradycardia.                                                            | text (datetime_mdy), Required                                                                                                                                                                                                                               |   |     |   |    |   |   |   |   |   |   |   |   |
| 436 | <b>brady_time5</b><br>Show the field ONLY if:<br>[brady_num] = '5'                                                                                     | Record the date and time of the fifth instance of bradycardia.                                                             | text (datetime_mdy), Required                                                                                                                                                                                                                               |   |     |   |    |   |   |   |   |   |   |   |   |

|     |                                                                                                                                                                          |                                                                                                                                                                                                                                                                                            |                                                                                                                                                                                                                                                                                                                                                                                                                                                                                                                                                                                                                                                                                                                                                                                                                              |   |                   |                          |    |                   |           |   |                   |           |   |                   |          |   |                   |                |   |                   |                     |   |                   |                                                      |   |                   |                             |   |                   |                   |
|-----|--------------------------------------------------------------------------------------------------------------------------------------------------------------------------|--------------------------------------------------------------------------------------------------------------------------------------------------------------------------------------------------------------------------------------------------------------------------------------------|------------------------------------------------------------------------------------------------------------------------------------------------------------------------------------------------------------------------------------------------------------------------------------------------------------------------------------------------------------------------------------------------------------------------------------------------------------------------------------------------------------------------------------------------------------------------------------------------------------------------------------------------------------------------------------------------------------------------------------------------------------------------------------------------------------------------------|---|-------------------|--------------------------|----|-------------------|-----------|---|-------------------|-----------|---|-------------------|----------|---|-------------------|----------------|---|-------------------|---------------------|---|-------------------|------------------------------------------------------|---|-------------------|-----------------------------|---|-------------------|-------------------|
| 437 | <b>postbup_misc_sx</b><br><br><b>Show the field ONLY if:</b><br><b>[postbup_ss] = '1'</b>                                                                                | <b>Section Header:</b> <i>Post-Bup Miscellaneous Opioid Related Side Effects</i><br><br><b>Please review the entire clinical chart and note if any of the following miscellaneous opioid related side effects were documented within 6 hours after first buprenorphine administration.</b> | <b>checkbox, Required</b><br><table border="1" data-bbox="1047 115 1549 682"> <tr> <td>1</td> <td>postbup_misc_sx_1</td> <td>Difficulty passing urine</td> </tr> <tr> <td>2</td> <td>postbup_misc_sx_2</td> <td>Itchiness</td> </tr> <tr> <td>3</td> <td>postbup_misc_sx_3</td> <td>Dry mouth</td> </tr> <tr> <td>4</td> <td>postbup_misc_sx_4</td> <td>Headache</td> </tr> <tr> <td>5</td> <td>postbup_misc_sx_5</td> <td>Unable to walk</td> </tr> <tr> <td>6</td> <td>postbup_misc_sx_6</td> <td>Unable to discharge</td> </tr> <tr> <td>7</td> <td>postbup_misc_sx_7</td> <td>Pupil size smaller than normal (constriction/miosis)</td> </tr> <tr> <td>8</td> <td>postbup_misc_sx_8</td> <td>Pupil size return to normal</td> </tr> <tr> <td>0</td> <td>postbup_misc_sx_0</td> <td>None of the above</td> </tr> </table> | 1 | postbup_misc_sx_1 | Difficulty passing urine | 2  | postbup_misc_sx_2 | Itchiness | 3 | postbup_misc_sx_3 | Dry mouth | 4 | postbup_misc_sx_4 | Headache | 5 | postbup_misc_sx_5 | Unable to walk | 6 | postbup_misc_sx_6 | Unable to discharge | 7 | postbup_misc_sx_7 | Pupil size smaller than normal (constriction/miosis) | 8 | postbup_misc_sx_8 | Pupil size return to normal | 0 | postbup_misc_sx_0 | None of the above |
| 1   | postbup_misc_sx_1                                                                                                                                                        | Difficulty passing urine                                                                                                                                                                                                                                                                   |                                                                                                                                                                                                                                                                                                                                                                                                                                                                                                                                                                                                                                                                                                                                                                                                                              |   |                   |                          |    |                   |           |   |                   |           |   |                   |          |   |                   |                |   |                   |                     |   |                   |                                                      |   |                   |                             |   |                   |                   |
| 2   | postbup_misc_sx_2                                                                                                                                                        | Itchiness                                                                                                                                                                                                                                                                                  |                                                                                                                                                                                                                                                                                                                                                                                                                                                                                                                                                                                                                                                                                                                                                                                                                              |   |                   |                          |    |                   |           |   |                   |           |   |                   |          |   |                   |                |   |                   |                     |   |                   |                                                      |   |                   |                             |   |                   |                   |
| 3   | postbup_misc_sx_3                                                                                                                                                        | Dry mouth                                                                                                                                                                                                                                                                                  |                                                                                                                                                                                                                                                                                                                                                                                                                                                                                                                                                                                                                                                                                                                                                                                                                              |   |                   |                          |    |                   |           |   |                   |           |   |                   |          |   |                   |                |   |                   |                     |   |                   |                                                      |   |                   |                             |   |                   |                   |
| 4   | postbup_misc_sx_4                                                                                                                                                        | Headache                                                                                                                                                                                                                                                                                   |                                                                                                                                                                                                                                                                                                                                                                                                                                                                                                                                                                                                                                                                                                                                                                                                                              |   |                   |                          |    |                   |           |   |                   |           |   |                   |          |   |                   |                |   |                   |                     |   |                   |                                                      |   |                   |                             |   |                   |                   |
| 5   | postbup_misc_sx_5                                                                                                                                                        | Unable to walk                                                                                                                                                                                                                                                                             |                                                                                                                                                                                                                                                                                                                                                                                                                                                                                                                                                                                                                                                                                                                                                                                                                              |   |                   |                          |    |                   |           |   |                   |           |   |                   |          |   |                   |                |   |                   |                     |   |                   |                                                      |   |                   |                             |   |                   |                   |
| 6   | postbup_misc_sx_6                                                                                                                                                        | Unable to discharge                                                                                                                                                                                                                                                                        |                                                                                                                                                                                                                                                                                                                                                                                                                                                                                                                                                                                                                                                                                                                                                                                                                              |   |                   |                          |    |                   |           |   |                   |           |   |                   |          |   |                   |                |   |                   |                     |   |                   |                                                      |   |                   |                             |   |                   |                   |
| 7   | postbup_misc_sx_7                                                                                                                                                        | Pupil size smaller than normal (constriction/miosis)                                                                                                                                                                                                                                       |                                                                                                                                                                                                                                                                                                                                                                                                                                                                                                                                                                                                                                                                                                                                                                                                                              |   |                   |                          |    |                   |           |   |                   |           |   |                   |          |   |                   |                |   |                   |                     |   |                   |                                                      |   |                   |                             |   |                   |                   |
| 8   | postbup_misc_sx_8                                                                                                                                                        | Pupil size return to normal                                                                                                                                                                                                                                                                |                                                                                                                                                                                                                                                                                                                                                                                                                                                                                                                                                                                                                                                                                                                                                                                                                              |   |                   |                          |    |                   |           |   |                   |           |   |                   |          |   |                   |                |   |                   |                     |   |                   |                                                      |   |                   |                             |   |                   |                   |
| 0   | postbup_misc_sx_0                                                                                                                                                        | None of the above                                                                                                                                                                                                                                                                          |                                                                                                                                                                                                                                                                                                                                                                                                                                                                                                                                                                                                                                                                                                                                                                                                                              |   |                   |                          |    |                   |           |   |                   |           |   |                   |          |   |                   |                |   |                   |                     |   |                   |                                                      |   |                   |                             |   |                   |                   |
| 438 | <b>urine_time_yn</b><br><br><b>Show the field ONLY if:</b><br><b>[postbup_misc_sx(1)] = '1'</b>                                                                          | <b>Did the provider document the time(s) at which difficulty urinating was noted?</b>                                                                                                                                                                                                      | <b>yesno, Required</b><br><table border="1" data-bbox="1047 724 1144 819"> <tr> <td>1</td> <td>Yes</td> </tr> <tr> <td>0</td> <td>No</td> </tr> </table>                                                                                                                                                                                                                                                                                                                                                                                                                                                                                                                                                                                                                                                                     | 1 | Yes               | 0                        | No |                   |           |   |                   |           |   |                   |          |   |                   |                |   |                   |                     |   |                   |                                                      |   |                   |                             |   |                   |                   |
| 1   | Yes                                                                                                                                                                      |                                                                                                                                                                                                                                                                                            |                                                                                                                                                                                                                                                                                                                                                                                                                                                                                                                                                                                                                                                                                                                                                                                                                              |   |                   |                          |    |                   |           |   |                   |           |   |                   |          |   |                   |                |   |                   |                     |   |                   |                                                      |   |                   |                             |   |                   |                   |
| 0   | No                                                                                                                                                                       |                                                                                                                                                                                                                                                                                            |                                                                                                                                                                                                                                                                                                                                                                                                                                                                                                                                                                                                                                                                                                                                                                                                                              |   |                   |                          |    |                   |           |   |                   |           |   |                   |          |   |                   |                |   |                   |                     |   |                   |                                                      |   |                   |                             |   |                   |                   |
| 439 | <b>urine_num</b><br><br><b>Show the field ONLY if:</b><br><b>[urine_time_yn] = '1'</b>                                                                                   | <b>How many instances of difficulty urinating were documented with timestamps within 6 hours after first buprenorphine administration?</b>                                                                                                                                                 | <b>radio, Required</b><br><table border="1" data-bbox="1047 892 1120 1165"> <tr> <td>0</td> <td>0</td> </tr> <tr> <td>1</td> <td>1</td> </tr> <tr> <td>2</td> <td>2</td> </tr> <tr> <td>3</td> <td>3</td> </tr> <tr> <td>4</td> <td>4</td> </tr> <tr> <td>5</td> <td>5</td> </tr> </table>                                                                                                                                                                                                                                                                                                                                                                                                                                                                                                                                   | 0 | 0                 | 1                        | 1  | 2                 | 2         | 3 | 3                 | 4         | 4 | 5                 | 5        |   |                   |                |   |                   |                     |   |                   |                                                      |   |                   |                             |   |                   |                   |
| 0   | 0                                                                                                                                                                        |                                                                                                                                                                                                                                                                                            |                                                                                                                                                                                                                                                                                                                                                                                                                                                                                                                                                                                                                                                                                                                                                                                                                              |   |                   |                          |    |                   |           |   |                   |           |   |                   |          |   |                   |                |   |                   |                     |   |                   |                                                      |   |                   |                             |   |                   |                   |
| 1   | 1                                                                                                                                                                        |                                                                                                                                                                                                                                                                                            |                                                                                                                                                                                                                                                                                                                                                                                                                                                                                                                                                                                                                                                                                                                                                                                                                              |   |                   |                          |    |                   |           |   |                   |           |   |                   |          |   |                   |                |   |                   |                     |   |                   |                                                      |   |                   |                             |   |                   |                   |
| 2   | 2                                                                                                                                                                        |                                                                                                                                                                                                                                                                                            |                                                                                                                                                                                                                                                                                                                                                                                                                                                                                                                                                                                                                                                                                                                                                                                                                              |   |                   |                          |    |                   |           |   |                   |           |   |                   |          |   |                   |                |   |                   |                     |   |                   |                                                      |   |                   |                             |   |                   |                   |
| 3   | 3                                                                                                                                                                        |                                                                                                                                                                                                                                                                                            |                                                                                                                                                                                                                                                                                                                                                                                                                                                                                                                                                                                                                                                                                                                                                                                                                              |   |                   |                          |    |                   |           |   |                   |           |   |                   |          |   |                   |                |   |                   |                     |   |                   |                                                      |   |                   |                             |   |                   |                   |
| 4   | 4                                                                                                                                                                        |                                                                                                                                                                                                                                                                                            |                                                                                                                                                                                                                                                                                                                                                                                                                                                                                                                                                                                                                                                                                                                                                                                                                              |   |                   |                          |    |                   |           |   |                   |           |   |                   |          |   |                   |                |   |                   |                     |   |                   |                                                      |   |                   |                             |   |                   |                   |
| 5   | 5                                                                                                                                                                        |                                                                                                                                                                                                                                                                                            |                                                                                                                                                                                                                                                                                                                                                                                                                                                                                                                                                                                                                                                                                                                                                                                                                              |   |                   |                          |    |                   |           |   |                   |           |   |                   |          |   |                   |                |   |                   |                     |   |                   |                                                      |   |                   |                             |   |                   |                   |
| 440 | <b>urine_time1</b><br><br><b>Show the field ONLY if:</b><br><b>[urine_num] = '1' or [urine_num] = '2' or [urine_num] = '3' or [urine_num] = '4' or [urine_num] = '5'</b> | <b>Record the date and time of the first instance of difficulty urinating.</b>                                                                                                                                                                                                             | <b>text (datetime_mdy), Required</b>                                                                                                                                                                                                                                                                                                                                                                                                                                                                                                                                                                                                                                                                                                                                                                                         |   |                   |                          |    |                   |           |   |                   |           |   |                   |          |   |                   |                |   |                   |                     |   |                   |                                                      |   |                   |                             |   |                   |                   |
| 441 | <b>urine_time2</b><br><br><b>Show the field ONLY if:</b><br><b>[urine_num] = '2' or [urine_num] = '3' or [urine_num] = '4' or [urine_num] = '5'</b>                      | <b>Record the date and time of the second instance of difficulty urinating.</b>                                                                                                                                                                                                            | <b>text (datetime_mdy), Required</b>                                                                                                                                                                                                                                                                                                                                                                                                                                                                                                                                                                                                                                                                                                                                                                                         |   |                   |                          |    |                   |           |   |                   |           |   |                   |          |   |                   |                |   |                   |                     |   |                   |                                                      |   |                   |                             |   |                   |                   |
| 442 | <b>urine_time3</b><br><br><b>Show the field ONLY if:</b><br><b>[urine_num] = '3' or [urine_num] = '4' or [urine_num] = '5'</b>                                           | <b>Record the date and time of the third instance of difficulty urinating.</b>                                                                                                                                                                                                             | <b>text (datetime_mdy), Required</b>                                                                                                                                                                                                                                                                                                                                                                                                                                                                                                                                                                                                                                                                                                                                                                                         |   |                   |                          |    |                   |           |   |                   |           |   |                   |          |   |                   |                |   |                   |                     |   |                   |                                                      |   |                   |                             |   |                   |                   |
| 443 | <b>urine_time4</b><br><br><b>Show the field ONLY if:</b><br><b>[urine_num] = '4' or [urine_num] = '5'</b>                                                                | <b>Record the date and time of the fourth instance of difficulty urinating.</b>                                                                                                                                                                                                            | <b>text (datetime_mdy), Required</b>                                                                                                                                                                                                                                                                                                                                                                                                                                                                                                                                                                                                                                                                                                                                                                                         |   |                   |                          |    |                   |           |   |                   |           |   |                   |          |   |                   |                |   |                   |                     |   |                   |                                                      |   |                   |                             |   |                   |                   |

|     |                                                                                                                                                        |                                                                                                                          |                                                                                                                                                                                                                                                             |   |     |   |    |   |   |   |   |   |   |   |   |
|-----|--------------------------------------------------------------------------------------------------------------------------------------------------------|--------------------------------------------------------------------------------------------------------------------------|-------------------------------------------------------------------------------------------------------------------------------------------------------------------------------------------------------------------------------------------------------------|---|-----|---|----|---|---|---|---|---|---|---|---|
| 444 | <b>urine_time5</b><br>Show the field ONLY if:<br>[urine_num] = '5'                                                                                     | Record the date and time of the fifth instance of difficulty urinating.                                                  | text (datetime_mdy), Required                                                                                                                                                                                                                               |   |     |   |    |   |   |   |   |   |   |   |   |
| 445 | <b>itchy_time_yn</b><br>Show the field ONLY if:<br>[postbup_misc_sx(2)] = '1'                                                                          | Did the provider document the time(s) at which itchiness was noted?                                                      | <b>yesno, Required</b><br><table border="1"> <tr> <td>1</td> <td>Yes</td> </tr> <tr> <td>0</td> <td>No</td> </tr> </table>                                                                                                                                  | 1 | Yes | 0 | No |   |   |   |   |   |   |   |   |
| 1   | Yes                                                                                                                                                    |                                                                                                                          |                                                                                                                                                                                                                                                             |   |     |   |    |   |   |   |   |   |   |   |   |
| 0   | No                                                                                                                                                     |                                                                                                                          |                                                                                                                                                                                                                                                             |   |     |   |    |   |   |   |   |   |   |   |   |
| 446 | <b>itchy_num</b><br>Show the field ONLY if:<br>[itchy_time_yn] = '1'                                                                                   | How many instances of itchiness were documented with timestamps within 6 hours after first buprenorphine administration? | <b>radio, Required</b><br><table border="1"> <tr> <td>0</td> <td>0</td> </tr> <tr> <td>1</td> <td>1</td> </tr> <tr> <td>2</td> <td>2</td> </tr> <tr> <td>3</td> <td>3</td> </tr> <tr> <td>4</td> <td>4</td> </tr> <tr> <td>5</td> <td>5</td> </tr> </table> | 0 | 0   | 1 | 1  | 2 | 2 | 3 | 3 | 4 | 4 | 5 | 5 |
| 0   | 0                                                                                                                                                      |                                                                                                                          |                                                                                                                                                                                                                                                             |   |     |   |    |   |   |   |   |   |   |   |   |
| 1   | 1                                                                                                                                                      |                                                                                                                          |                                                                                                                                                                                                                                                             |   |     |   |    |   |   |   |   |   |   |   |   |
| 2   | 2                                                                                                                                                      |                                                                                                                          |                                                                                                                                                                                                                                                             |   |     |   |    |   |   |   |   |   |   |   |   |
| 3   | 3                                                                                                                                                      |                                                                                                                          |                                                                                                                                                                                                                                                             |   |     |   |    |   |   |   |   |   |   |   |   |
| 4   | 4                                                                                                                                                      |                                                                                                                          |                                                                                                                                                                                                                                                             |   |     |   |    |   |   |   |   |   |   |   |   |
| 5   | 5                                                                                                                                                      |                                                                                                                          |                                                                                                                                                                                                                                                             |   |     |   |    |   |   |   |   |   |   |   |   |
| 447 | <b>itchy_time1</b><br>Show the field ONLY if:<br>[itchy_num] = '1' or [itchy_num] = '2' or [itchy_num] = '3' or [itchy_num] = '4' or [itchy_num] = '5' | Record the date and time of the first instance of itchiness.                                                             | text (datetime_mdy), Required                                                                                                                                                                                                                               |   |     |   |    |   |   |   |   |   |   |   |   |
| 448 | <b>itchy_time2</b><br>Show the field ONLY if:<br>[itchy_num] = '2' or [itchy_num] = '3' or [itchy_num] = '4' or [itchy_num] = '5'                      | Record the date and time of the second instance of itchiness.                                                            | text (datetime_mdy), Required                                                                                                                                                                                                                               |   |     |   |    |   |   |   |   |   |   |   |   |
| 449 | <b>itchy_time3</b><br>Show the field ONLY if:<br>[itchy_num] = '3' or [itchy_num] = '4' or [itchy_num] = '5'                                           | Record the date and time of the third instance of itchiness.                                                             | text (datetime_mdy), Required                                                                                                                                                                                                                               |   |     |   |    |   |   |   |   |   |   |   |   |
| 450 | <b>itchy_time4</b><br>Show the field ONLY if:<br>[itchy_num] = '4' or [itchy_num] = '5'                                                                | Record the date and time of the fourth instance of itchiness.                                                            | text (datetime_mdy), Required                                                                                                                                                                                                                               |   |     |   |    |   |   |   |   |   |   |   |   |
| 451 | <b>itchy_time5</b><br>Show the field ONLY if:<br>[itchy_num] = '5'                                                                                     | Record the date and time of the fifth instance of itchiness.                                                             | text (datetime_mdy), Required                                                                                                                                                                                                                               |   |     |   |    |   |   |   |   |   |   |   |   |
| 452 | <b>mouth_time_yn</b><br>Show the field ONLY if:<br>[postbup_misc_sx(3)] = '1'                                                                          | Did the provider document the time(s) at which dry mouth was noted?                                                      | <b>yesno, Required</b><br><table border="1"> <tr> <td>1</td> <td>Yes</td> </tr> <tr> <td>0</td> <td>No</td> </tr> </table>                                                                                                                                  | 1 | Yes | 0 | No |   |   |   |   |   |   |   |   |
| 1   | Yes                                                                                                                                                    |                                                                                                                          |                                                                                                                                                                                                                                                             |   |     |   |    |   |   |   |   |   |   |   |   |
| 0   | No                                                                                                                                                     |                                                                                                                          |                                                                                                                                                                                                                                                             |   |     |   |    |   |   |   |   |   |   |   |   |

|     |                                                                                                                                                        |                                                                                                                          |                                                                                                                                                                                                                                           |   |     |   |    |   |   |   |   |   |   |   |   |
|-----|--------------------------------------------------------------------------------------------------------------------------------------------------------|--------------------------------------------------------------------------------------------------------------------------|-------------------------------------------------------------------------------------------------------------------------------------------------------------------------------------------------------------------------------------------|---|-----|---|----|---|---|---|---|---|---|---|---|
| 453 | <b>mouth_num</b><br>Show the field ONLY if:<br>[mouth_time_yn] = '1'                                                                                   | How many instances of dry mouth were documented with timestamps within 6 hours after first buprenorphine administration? | <b>radio, Required</b><br><table border="1"> <tr><td>0</td><td>0</td></tr> <tr><td>1</td><td>1</td></tr> <tr><td>2</td><td>2</td></tr> <tr><td>3</td><td>3</td></tr> <tr><td>4</td><td>4</td></tr> <tr><td>5</td><td>5</td></tr> </table> | 0 | 0   | 1 | 1  | 2 | 2 | 3 | 3 | 4 | 4 | 5 | 5 |
| 0   | 0                                                                                                                                                      |                                                                                                                          |                                                                                                                                                                                                                                           |   |     |   |    |   |   |   |   |   |   |   |   |
| 1   | 1                                                                                                                                                      |                                                                                                                          |                                                                                                                                                                                                                                           |   |     |   |    |   |   |   |   |   |   |   |   |
| 2   | 2                                                                                                                                                      |                                                                                                                          |                                                                                                                                                                                                                                           |   |     |   |    |   |   |   |   |   |   |   |   |
| 3   | 3                                                                                                                                                      |                                                                                                                          |                                                                                                                                                                                                                                           |   |     |   |    |   |   |   |   |   |   |   |   |
| 4   | 4                                                                                                                                                      |                                                                                                                          |                                                                                                                                                                                                                                           |   |     |   |    |   |   |   |   |   |   |   |   |
| 5   | 5                                                                                                                                                      |                                                                                                                          |                                                                                                                                                                                                                                           |   |     |   |    |   |   |   |   |   |   |   |   |
| 454 | <b>mouth_time1</b><br>Show the field ONLY if:<br>[mouth_num] = '1' or [mouth_num] = '2' or [mouth_num] = '3' or [mouth_num] = '4' or [mouth_num] = '5' | Record the date and time of the first instance of dry mouth.                                                             | <b>text (datetime_mdy), Required</b>                                                                                                                                                                                                      |   |     |   |    |   |   |   |   |   |   |   |   |
| 455 | <b>mouth_time2</b><br>Show the field ONLY if:<br>[mouth_num] = '2' or [mouth_num] = '3' or [mouth_num] = '4' or [mouth_num] = '5'                      | Record the date and time of the second instance of dry mouth.                                                            | <b>text (datetime_mdy), Required</b>                                                                                                                                                                                                      |   |     |   |    |   |   |   |   |   |   |   |   |
| 456 | <b>mouth_time3</b><br>Show the field ONLY if:<br>[mouth_num] = '3' or [mouth_num] = '4' or [mouth_num] = '5'                                           | Record the date and time of the third instance of dry mouth.                                                             | <b>text (datetime_mdy), Required</b>                                                                                                                                                                                                      |   |     |   |    |   |   |   |   |   |   |   |   |
| 457 | <b>mouth_time4</b><br>Show the field ONLY if:<br>[mouth_num] = '4' or [mouth_num] = '5'                                                                | Record the date and time of the fourth instance of dry mouth.                                                            | <b>text (datetime_mdy), Required</b>                                                                                                                                                                                                      |   |     |   |    |   |   |   |   |   |   |   |   |
| 458 | <b>mouth_time5</b><br>Show the field ONLY if:<br>[mouth_num] = '5'                                                                                     | Record the date and time of the fifth instance of dry mouth.                                                             | <b>text (datetime_mdy), Required</b>                                                                                                                                                                                                      |   |     |   |    |   |   |   |   |   |   |   |   |
| 459 | <b>headache_time_yn</b><br>Show the field ONLY if:<br>[postbup_misc_sx(4)] = '1'                                                                       | Did the provider document the time(s) at which headache was noted?                                                       | <b>yesno, Required</b><br><table border="1"> <tr><td>1</td><td>Yes</td></tr> <tr><td>0</td><td>No</td></tr> </table>                                                                                                                      | 1 | Yes | 0 | No |   |   |   |   |   |   |   |   |
| 1   | Yes                                                                                                                                                    |                                                                                                                          |                                                                                                                                                                                                                                           |   |     |   |    |   |   |   |   |   |   |   |   |
| 0   | No                                                                                                                                                     |                                                                                                                          |                                                                                                                                                                                                                                           |   |     |   |    |   |   |   |   |   |   |   |   |
| 460 | <b>headache_num</b><br>Show the field ONLY if:<br>[headache_time_yn] = '1'                                                                             | How many instances of headache were documented with timestamps within 6 hours after first buprenorphine administration?  | <b>radio, Required</b><br><table border="1"> <tr><td>0</td><td>0</td></tr> <tr><td>1</td><td>1</td></tr> <tr><td>2</td><td>2</td></tr> <tr><td>3</td><td>3</td></tr> <tr><td>4</td><td>4</td></tr> <tr><td>5</td><td>5</td></tr> </table> | 0 | 0   | 1 | 1  | 2 | 2 | 3 | 3 | 4 | 4 | 5 | 5 |
| 0   | 0                                                                                                                                                      |                                                                                                                          |                                                                                                                                                                                                                                           |   |     |   |    |   |   |   |   |   |   |   |   |
| 1   | 1                                                                                                                                                      |                                                                                                                          |                                                                                                                                                                                                                                           |   |     |   |    |   |   |   |   |   |   |   |   |
| 2   | 2                                                                                                                                                      |                                                                                                                          |                                                                                                                                                                                                                                           |   |     |   |    |   |   |   |   |   |   |   |   |
| 3   | 3                                                                                                                                                      |                                                                                                                          |                                                                                                                                                                                                                                           |   |     |   |    |   |   |   |   |   |   |   |   |
| 4   | 4                                                                                                                                                      |                                                                                                                          |                                                                                                                                                                                                                                           |   |     |   |    |   |   |   |   |   |   |   |   |
| 5   | 5                                                                                                                                                      |                                                                                                                          |                                                                                                                                                                                                                                           |   |     |   |    |   |   |   |   |   |   |   |   |

|     |                                                                                                                                                                                      |                                                                                                                                  |                                                                                                                                                                                                                                                             |   |     |   |    |   |   |   |   |   |   |   |   |
|-----|--------------------------------------------------------------------------------------------------------------------------------------------------------------------------------------|----------------------------------------------------------------------------------------------------------------------------------|-------------------------------------------------------------------------------------------------------------------------------------------------------------------------------------------------------------------------------------------------------------|---|-----|---|----|---|---|---|---|---|---|---|---|
| 461 | <b>headache_time1</b><br>Show the field ONLY if:<br>[headache_num] = '1' or<br>[headache_num] = '2' or<br>[headache_num] = '3' or<br>[headache_num] = '4' or<br>[headache_num] = '5' | Record the date and time of the first instance of headache.                                                                      | text (datetime_mdy), Required                                                                                                                                                                                                                               |   |     |   |    |   |   |   |   |   |   |   |   |
| 462 | <b>headache_time2</b><br>Show the field ONLY if:<br>[headache_num] = '2' or<br>[headache_num] = '3' or<br>[headache_num] = '4' or<br>[headache_num] = '5'                            | Record the date and time of the second instance of headache.                                                                     | text (datetime_mdy), Required                                                                                                                                                                                                                               |   |     |   |    |   |   |   |   |   |   |   |   |
| 463 | <b>headache_time3</b><br>Show the field ONLY if:<br>[headache_num] = '3' or<br>[headache_num] = '4' or<br>[headache_num] = '5'                                                       | Record the date and time of the third instance of headache.                                                                      | text (datetime_mdy), Required                                                                                                                                                                                                                               |   |     |   |    |   |   |   |   |   |   |   |   |
| 464 | <b>headache_time4</b><br>Show the field ONLY if:<br>[headache_num] = '4' or<br>[headache_num] = '5'                                                                                  | Record the date and time of the fourth instance of headache.                                                                     | text (datetime_mdy), Required                                                                                                                                                                                                                               |   |     |   |    |   |   |   |   |   |   |   |   |
| 465 | <b>headache_time5</b><br>Show the field ONLY if:<br>[headache_num] = '5'                                                                                                             | Record the date and time of the fifth instance of headache.                                                                      | text (datetime_mdy), Required                                                                                                                                                                                                                               |   |     |   |    |   |   |   |   |   |   |   |   |
| 466 | <b>nowalk_time_yn</b><br>Show the field ONLY if:<br>[postbup_misc_sx(5)] = '1'                                                                                                       | Did the provider document the time(s) at which inability to walk was noted?                                                      | <b>yesno, Required</b><br><table border="1"> <tr> <td>1</td> <td>Yes</td> </tr> <tr> <td>0</td> <td>No</td> </tr> </table>                                                                                                                                  | 1 | Yes | 0 | No |   |   |   |   |   |   |   |   |
| 1   | Yes                                                                                                                                                                                  |                                                                                                                                  |                                                                                                                                                                                                                                                             |   |     |   |    |   |   |   |   |   |   |   |   |
| 0   | No                                                                                                                                                                                   |                                                                                                                                  |                                                                                                                                                                                                                                                             |   |     |   |    |   |   |   |   |   |   |   |   |
| 467 | <b>nowalk_num</b><br>Show the field ONLY if:<br>[nowalk_time_yn] = '1'                                                                                                               | How many instances of inability to walk were documented with timestamps within 6 hours after first buprenorphine administration? | <b>radio, Required</b><br><table border="1"> <tr> <td>0</td> <td>0</td> </tr> <tr> <td>1</td> <td>1</td> </tr> <tr> <td>2</td> <td>2</td> </tr> <tr> <td>3</td> <td>3</td> </tr> <tr> <td>4</td> <td>4</td> </tr> <tr> <td>5</td> <td>5</td> </tr> </table> | 0 | 0   | 1 | 1  | 2 | 2 | 3 | 3 | 4 | 4 | 5 | 5 |
| 0   | 0                                                                                                                                                                                    |                                                                                                                                  |                                                                                                                                                                                                                                                             |   |     |   |    |   |   |   |   |   |   |   |   |
| 1   | 1                                                                                                                                                                                    |                                                                                                                                  |                                                                                                                                                                                                                                                             |   |     |   |    |   |   |   |   |   |   |   |   |
| 2   | 2                                                                                                                                                                                    |                                                                                                                                  |                                                                                                                                                                                                                                                             |   |     |   |    |   |   |   |   |   |   |   |   |
| 3   | 3                                                                                                                                                                                    |                                                                                                                                  |                                                                                                                                                                                                                                                             |   |     |   |    |   |   |   |   |   |   |   |   |
| 4   | 4                                                                                                                                                                                    |                                                                                                                                  |                                                                                                                                                                                                                                                             |   |     |   |    |   |   |   |   |   |   |   |   |
| 5   | 5                                                                                                                                                                                    |                                                                                                                                  |                                                                                                                                                                                                                                                             |   |     |   |    |   |   |   |   |   |   |   |   |
| 468 | <b>nowalk_time1</b><br>Show the field ONLY if:<br>[nowalk_num] = '1' or [nowalk_num] = '2' or [nowalk_num] = '3' or [nowalk_num] = '4' or [nowalk_num] = '5'                         | Record the date and time of the first instance of inability to walk.                                                             | text (datetime_mdy), Required                                                                                                                                                                                                                               |   |     |   |    |   |   |   |   |   |   |   |   |

|     |                                                                                                                                                  |                                                                                                                                       |                                                                                                                                                                                                                                                      |   |     |   |    |   |   |   |   |   |   |   |   |
|-----|--------------------------------------------------------------------------------------------------------------------------------------------------|---------------------------------------------------------------------------------------------------------------------------------------|------------------------------------------------------------------------------------------------------------------------------------------------------------------------------------------------------------------------------------------------------|---|-----|---|----|---|---|---|---|---|---|---|---|
| 469 | <b>nowalk_time2</b><br>Show the field ONLY if:<br>[nowalk_num] = '2' or [nowalk_num] = '3' or [nowalk_num] = '4' or [nowalk_num] = '5'           | Record the date and time of the second instance of inability to walk.                                                                 | text (datetime_mdy), Required                                                                                                                                                                                                                        |   |     |   |    |   |   |   |   |   |   |   |   |
| 470 | <b>nowalk_time3</b><br>Show the field ONLY if:<br>[nowalk_num] = '3' or [nowalk_num] = '4' or [nowalk_num] = '5'                                 | Record the date and time of the third instance of inability to walk.                                                                  | text (datetime_mdy), Required                                                                                                                                                                                                                        |   |     |   |    |   |   |   |   |   |   |   |   |
| 471 | <b>nowalk_time4</b><br>Show the field ONLY if:<br>[nowalk_num] = '4' or [nowalk_num] = '5'                                                       | Record the date and time of the fourth instance of inability to walk.                                                                 | text (datetime_mdy), Required                                                                                                                                                                                                                        |   |     |   |    |   |   |   |   |   |   |   |   |
| 472 | <b>nowalk_time5</b><br>Show the field ONLY if:<br>[nowalk_num] = '5'                                                                             | Record the date and time of the fifth instance of inability to walk.                                                                  | text (datetime_mdy), Required                                                                                                                                                                                                                        |   |     |   |    |   |   |   |   |   |   |   |   |
| 473 | <b>nodc_time_yn</b><br>Show the field ONLY if:<br>[postbup_misc_sx(6)] = '1'                                                                     | Did the provider document the time(s) at which inability to discharge the patient was noted?                                          | yesno, Required<br><table border="1"> <tr> <td>1</td> <td>Yes</td> </tr> <tr> <td>0</td> <td>No</td> </tr> </table>                                                                                                                                  | 1 | Yes | 0 | No |   |   |   |   |   |   |   |   |
| 1   | Yes                                                                                                                                              |                                                                                                                                       |                                                                                                                                                                                                                                                      |   |     |   |    |   |   |   |   |   |   |   |   |
| 0   | No                                                                                                                                               |                                                                                                                                       |                                                                                                                                                                                                                                                      |   |     |   |    |   |   |   |   |   |   |   |   |
| 474 | <b>nodc_num</b><br>Show the field ONLY if:<br>[nodc_time_yn] = '1'                                                                               | How many instances of inability to discharge were documented with timestamps within 6 hours after first buprenorphine administration? | radio, Required<br><table border="1"> <tr> <td>0</td> <td>0</td> </tr> <tr> <td>1</td> <td>1</td> </tr> <tr> <td>2</td> <td>2</td> </tr> <tr> <td>3</td> <td>3</td> </tr> <tr> <td>4</td> <td>4</td> </tr> <tr> <td>5</td> <td>5</td> </tr> </table> | 0 | 0   | 1 | 1  | 2 | 2 | 3 | 3 | 4 | 4 | 5 | 5 |
| 0   | 0                                                                                                                                                |                                                                                                                                       |                                                                                                                                                                                                                                                      |   |     |   |    |   |   |   |   |   |   |   |   |
| 1   | 1                                                                                                                                                |                                                                                                                                       |                                                                                                                                                                                                                                                      |   |     |   |    |   |   |   |   |   |   |   |   |
| 2   | 2                                                                                                                                                |                                                                                                                                       |                                                                                                                                                                                                                                                      |   |     |   |    |   |   |   |   |   |   |   |   |
| 3   | 3                                                                                                                                                |                                                                                                                                       |                                                                                                                                                                                                                                                      |   |     |   |    |   |   |   |   |   |   |   |   |
| 4   | 4                                                                                                                                                |                                                                                                                                       |                                                                                                                                                                                                                                                      |   |     |   |    |   |   |   |   |   |   |   |   |
| 5   | 5                                                                                                                                                |                                                                                                                                       |                                                                                                                                                                                                                                                      |   |     |   |    |   |   |   |   |   |   |   |   |
| 475 | <b>nodc_time1</b><br>Show the field ONLY if:<br>[nodc_num] = '1' or [nodc_num] = '2' or [nodc_num] = '3' or [nodc_num] = '4' or [nodc_num] = '5' | Record the date and time of the first instance of inability to discharge.                                                             | text (datetime_mdy), Required                                                                                                                                                                                                                        |   |     |   |    |   |   |   |   |   |   |   |   |
| 476 | <b>nodc_time2</b><br>Show the field ONLY if:<br>[nodc_num] = '2' or [nodc_num] = '3' or [nodc_num] = '4' or [nodc_num] = '5'                     | Record the date and time of the second instance of inability to discharge.                                                            | text (datetime_mdy), Required                                                                                                                                                                                                                        |   |     |   |    |   |   |   |   |   |   |   |   |
| 477 | <b>nodc_time3</b><br>Show the field ONLY if:<br>[nodc_num] = '3' or [nodc_num] = '4' or [nodc_num] = '5'                                         | Record the date and time of the third instance of inability to discharge.                                                             | text (datetime_mdy), Required                                                                                                                                                                                                                        |   |     |   |    |   |   |   |   |   |   |   |   |

|     |                                                                                                                                                                     |                                                                                                                                   |                                                                                                                                                                                                                                    |   |     |   |    |   |   |   |   |   |   |   |   |
|-----|---------------------------------------------------------------------------------------------------------------------------------------------------------------------|-----------------------------------------------------------------------------------------------------------------------------------|------------------------------------------------------------------------------------------------------------------------------------------------------------------------------------------------------------------------------------|---|-----|---|----|---|---|---|---|---|---|---|---|
| 478 | <b>nodc_time4</b><br>Show the field ONLY if:<br>[nodc_num] = '4' or [nodc_num] = '5'                                                                                | Record the date and time of the fourth instance of inability to discharge.                                                        | text (datetime_mdy), Required                                                                                                                                                                                                      |   |     |   |    |   |   |   |   |   |   |   |   |
| 479 | <b>nodc_time5</b><br>Show the field ONLY if:<br>[nodc_num] = '5'                                                                                                    | Record the date and time of the fifth instance of inability to discharge.                                                         | text (datetime_mdy), Required                                                                                                                                                                                                      |   |     |   |    |   |   |   |   |   |   |   |   |
| 480 | <b>miosis_time_yn</b><br>Show the field ONLY if:<br>[postbup_misc_sx(7)] = '1'                                                                                      | Did the provider document the time(s) at which pupil constriction was noted?                                                      | yesno, Required<br><table border="1"> <tr><td>1</td><td>Yes</td></tr> <tr><td>0</td><td>No</td></tr> </table>                                                                                                                      | 1 | Yes | 0 | No |   |   |   |   |   |   |   |   |
| 1   | Yes                                                                                                                                                                 |                                                                                                                                   |                                                                                                                                                                                                                                    |   |     |   |    |   |   |   |   |   |   |   |   |
| 0   | No                                                                                                                                                                  |                                                                                                                                   |                                                                                                                                                                                                                                    |   |     |   |    |   |   |   |   |   |   |   |   |
| 481 | <b>miosis_num</b><br>Show the field ONLY if:<br>[miosis_time_yn] = '1'                                                                                              | How many instances of pupil constriction were documented with timestamps within 6 hours after first buprenorphine administration? | radio, Required<br><table border="1"> <tr><td>0</td><td>0</td></tr> <tr><td>1</td><td>1</td></tr> <tr><td>2</td><td>2</td></tr> <tr><td>3</td><td>3</td></tr> <tr><td>4</td><td>4</td></tr> <tr><td>5</td><td>5</td></tr> </table> | 0 | 0   | 1 | 1  | 2 | 2 | 3 | 3 | 4 | 4 | 5 | 5 |
| 0   | 0                                                                                                                                                                   |                                                                                                                                   |                                                                                                                                                                                                                                    |   |     |   |    |   |   |   |   |   |   |   |   |
| 1   | 1                                                                                                                                                                   |                                                                                                                                   |                                                                                                                                                                                                                                    |   |     |   |    |   |   |   |   |   |   |   |   |
| 2   | 2                                                                                                                                                                   |                                                                                                                                   |                                                                                                                                                                                                                                    |   |     |   |    |   |   |   |   |   |   |   |   |
| 3   | 3                                                                                                                                                                   |                                                                                                                                   |                                                                                                                                                                                                                                    |   |     |   |    |   |   |   |   |   |   |   |   |
| 4   | 4                                                                                                                                                                   |                                                                                                                                   |                                                                                                                                                                                                                                    |   |     |   |    |   |   |   |   |   |   |   |   |
| 5   | 5                                                                                                                                                                   |                                                                                                                                   |                                                                                                                                                                                                                                    |   |     |   |    |   |   |   |   |   |   |   |   |
| 482 | <b>miosis_time1</b><br>Show the field ONLY if:<br>[miosis_num] = '1' or [miosis_num] = '2' or [miosis_num] = '3' or [miosis_num] = '4' or [miosis_num] = '5'        | Record the date and time of the first instance of pupil constriction.                                                             | text (datetime_mdy), Required                                                                                                                                                                                                      |   |     |   |    |   |   |   |   |   |   |   |   |
| 483 | <b>postbup_miosis_mm_1</b><br>Show the field ONLY if:<br>[miosis_num] = '1' or [miosis_num] = '2' or [miosis_num] = '3' or [miosis_num] = '4' or [miosis_num] = '5' | Pupil measurement listed?                                                                                                         | yesno, Required<br><table border="1"> <tr><td>1</td><td>Yes</td></tr> <tr><td>0</td><td>No</td></tr> </table>                                                                                                                      | 1 | Yes | 0 | No |   |   |   |   |   |   |   |   |
| 1   | Yes                                                                                                                                                                 |                                                                                                                                   |                                                                                                                                                                                                                                    |   |     |   |    |   |   |   |   |   |   |   |   |
| 0   | No                                                                                                                                                                  |                                                                                                                                   |                                                                                                                                                                                                                                    |   |     |   |    |   |   |   |   |   |   |   |   |
| 484 | <b>postbup_miosis_size_1</b><br>Show the field ONLY if:<br>[postbup_miosis_mm_1] = '1'                                                                              | Please enter the pupil size measured (in mm)                                                                                      | text, Required                                                                                                                                                                                                                     |   |     |   |    |   |   |   |   |   |   |   |   |
| 485 | <b>miosis_time2</b><br>Show the field ONLY if:<br>[miosis_num] = '2' or [miosis_num] = '3' or [miosis_num] = '4' or [miosis_num] = '5'                              | Record the date and time of the second instance of pupil constriction.                                                            | text (datetime_mdy), Required                                                                                                                                                                                                      |   |     |   |    |   |   |   |   |   |   |   |   |
| 486 | <b>postbup_miosis_mm_2</b><br>Show the field ONLY if:<br>[miosis_num] = '2' or [miosis_num] = '3' or [miosis_num] = '4' or [miosis_num] = '5'                       | Pupil measurement listed?                                                                                                         | yesno, Required<br><table border="1"> <tr><td>1</td><td>Yes</td></tr> <tr><td>0</td><td>No</td></tr> </table>                                                                                                                      | 1 | Yes | 0 | No |   |   |   |   |   |   |   |   |
| 1   | Yes                                                                                                                                                                 |                                                                                                                                   |                                                                                                                                                                                                                                    |   |     |   |    |   |   |   |   |   |   |   |   |
| 0   | No                                                                                                                                                                  |                                                                                                                                   |                                                                                                                                                                                                                                    |   |     |   |    |   |   |   |   |   |   |   |   |



|     |                                                                                                                         |                                                                                       |                                                                                                                            |   |     |   |    |
|-----|-------------------------------------------------------------------------------------------------------------------------|---------------------------------------------------------------------------------------|----------------------------------------------------------------------------------------------------------------------------|---|-----|---|----|
| 487 | <b>postbup_miosis_size_2</b><br>Show the field ONLY if:<br>[postbup_miosis_mm_2] = '1'                                  | Please enter the pupil size measured (in mm)                                          | text, Required                                                                                                             |   |     |   |    |
| 488 | <b>miosis_time3</b><br>Show the field ONLY if:<br>[miosis_num] = '3' or [miosis_num] = '4' or [miosis_num] = '5'        | Record the date and time of the third instance of pupil constriction.                 | text (datetime_mdy), Required                                                                                              |   |     |   |    |
| 489 | <b>postbup_miosis_mm_3</b><br>Show the field ONLY if:<br>[miosis_num] = '3' or [miosis_num] = '4' or [miosis_num] = '5' | Pupil measurement listed?                                                             | <b>yesno, Required</b><br><table border="1"> <tr> <td>1</td> <td>Yes</td> </tr> <tr> <td>0</td> <td>No</td> </tr> </table> | 1 | Yes | 0 | No |
| 1   | Yes                                                                                                                     |                                                                                       |                                                                                                                            |   |     |   |    |
| 0   | No                                                                                                                      |                                                                                       |                                                                                                                            |   |     |   |    |
| 490 | <b>postbup_miosis_size_3</b><br>Show the field ONLY if:<br>[postbup_miosis_mm_3] = '1'                                  | Please enter the pupil size measured (in mm)                                          | text, Required                                                                                                             |   |     |   |    |
| 491 | <b>miosis_time4</b><br>Show the field ONLY if:<br>[miosis_num] = '4' or [miosis_num] = '5'                              | Record the date and time of the fourth instance of pupil constriction.                | text (datetime_mdy), Required                                                                                              |   |     |   |    |
| 492 | <b>postbup_miosis_mm_4</b><br>Show the field ONLY if:<br>[miosis_num] = '4' or [miosis_num] = '5'                       | Pupil measurement listed?                                                             | <b>yesno, Required</b><br><table border="1"> <tr> <td>1</td> <td>Yes</td> </tr> <tr> <td>0</td> <td>No</td> </tr> </table> | 1 | Yes | 0 | No |
| 1   | Yes                                                                                                                     |                                                                                       |                                                                                                                            |   |     |   |    |
| 0   | No                                                                                                                      |                                                                                       |                                                                                                                            |   |     |   |    |
| 493 | <b>postbup_miosis_size_4</b><br>Show the field ONLY if:<br>[postbup_miosis_mm_4] = '1'                                  | Please enter the pupil size measured (in mm)                                          | text, Required                                                                                                             |   |     |   |    |
| 494 | <b>miosis_time5</b><br>Show the field ONLY if:<br>[miosis_num] = '5'                                                    | Record the date and time of the fifth instance of pupil constriction.                 | text (datetime_mdy), Required                                                                                              |   |     |   |    |
| 495 | <b>postbup_miosis_mm_5</b><br>Show the field ONLY if:<br>[miosis_num] = '5'                                             | Pupil measurement listed?                                                             | <b>yesno, Required</b><br><table border="1"> <tr> <td>1</td> <td>Yes</td> </tr> <tr> <td>0</td> <td>No</td> </tr> </table> | 1 | Yes | 0 | No |
| 1   | Yes                                                                                                                     |                                                                                       |                                                                                                                            |   |     |   |    |
| 0   | No                                                                                                                      |                                                                                       |                                                                                                                            |   |     |   |    |
| 496 | <b>postbup_miosis_size_5</b><br>Show the field ONLY if:<br>[postbup_miosis_mm_5] = '1'                                  | Please enter the pupil size measured (in mm)                                          | text, Required                                                                                                             |   |     |   |    |
| 497 | <b>postbup_perrl_time_yn</b><br>Show the field ONLY if:<br>[postbup_misc_sx(8)] = '1'                                   | Did the provider document the time(s) at which return to normal pupil size was noted? | <b>yesno, Required</b><br><table border="1"> <tr> <td>1</td> <td>Yes</td> </tr> <tr> <td>0</td> <td>No</td> </tr> </table> | 1 | Yes | 0 | No |
| 1   | Yes                                                                                                                     |                                                                                       |                                                                                                                            |   |     |   |    |
| 0   | No                                                                                                                      |                                                                                       |                                                                                                                            |   |     |   |    |

|     |                                                                                                                                                                           |                                                                                                                                                   |                                                                                                                                                                                                                                               |   |     |   |    |   |   |   |   |   |   |   |   |
|-----|---------------------------------------------------------------------------------------------------------------------------------------------------------------------------|---------------------------------------------------------------------------------------------------------------------------------------------------|-----------------------------------------------------------------------------------------------------------------------------------------------------------------------------------------------------------------------------------------------|---|-----|---|----|---|---|---|---|---|---|---|---|
| 498 | <p><b>perrl_num</b></p> <p>Show the field ONLY if:<br/>[postbup_perrl_time_yn] = '1'</p>                                                                                  | <p>How many instances of return to normal pupil size were documented with timestamps within 6 hours after first buprenorphine administration?</p> | <p><b>radio, Required</b></p> <table border="1"> <tr><td>0</td><td>0</td></tr> <tr><td>1</td><td>1</td></tr> <tr><td>2</td><td>2</td></tr> <tr><td>3</td><td>3</td></tr> <tr><td>4</td><td>4</td></tr> <tr><td>5</td><td>5</td></tr> </table> | 0 | 0   | 1 | 1  | 2 | 2 | 3 | 3 | 4 | 4 | 5 | 5 |
| 0   | 0                                                                                                                                                                         |                                                                                                                                                   |                                                                                                                                                                                                                                               |   |     |   |    |   |   |   |   |   |   |   |   |
| 1   | 1                                                                                                                                                                         |                                                                                                                                                   |                                                                                                                                                                                                                                               |   |     |   |    |   |   |   |   |   |   |   |   |
| 2   | 2                                                                                                                                                                         |                                                                                                                                                   |                                                                                                                                                                                                                                               |   |     |   |    |   |   |   |   |   |   |   |   |
| 3   | 3                                                                                                                                                                         |                                                                                                                                                   |                                                                                                                                                                                                                                               |   |     |   |    |   |   |   |   |   |   |   |   |
| 4   | 4                                                                                                                                                                         |                                                                                                                                                   |                                                                                                                                                                                                                                               |   |     |   |    |   |   |   |   |   |   |   |   |
| 5   | 5                                                                                                                                                                         |                                                                                                                                                   |                                                                                                                                                                                                                                               |   |     |   |    |   |   |   |   |   |   |   |   |
| 499 | <p><b>perrl_time1</b></p> <p>Show the field ONLY if:<br/>[perrl_num] = '1' or [perrl_num] = '2' or [perrl_num] = '3' or [perrl_num] = '4' or [perrl_num] = '5'</p>        | <p>Record the date and time of the first instance of return to normal pupil size.</p>                                                             | <p><b>text (datetime_mdy), Required</b></p>                                                                                                                                                                                                   |   |     |   |    |   |   |   |   |   |   |   |   |
| 500 | <p><b>postbup_perrl_mm_1</b></p> <p>Show the field ONLY if:<br/>[perrl_num] = '1' or [perrl_num] = '2' or [perrl_num] = '3' or [perrl_num] = '4' or [perrl_num] = '5'</p> | <p>Pupil measurement listed?</p>                                                                                                                  | <p><b>yesno, Required</b></p> <table border="1"> <tr><td>1</td><td>Yes</td></tr> <tr><td>0</td><td>No</td></tr> </table>                                                                                                                      | 1 | Yes | 0 | No |   |   |   |   |   |   |   |   |
| 1   | Yes                                                                                                                                                                       |                                                                                                                                                   |                                                                                                                                                                                                                                               |   |     |   |    |   |   |   |   |   |   |   |   |
| 0   | No                                                                                                                                                                        |                                                                                                                                                   |                                                                                                                                                                                                                                               |   |     |   |    |   |   |   |   |   |   |   |   |
| 501 | <p><b>postbup_perrl_size_1</b></p> <p>Show the field ONLY if:<br/>[postbup_perrl_mm_1] = '1'</p>                                                                          | <p>Please enter the pupil size measured (in mm)</p>                                                                                               | <p><b>text, Required</b></p>                                                                                                                                                                                                                  |   |     |   |    |   |   |   |   |   |   |   |   |
| 502 | <p><b>perrl_time2</b></p> <p>Show the field ONLY if:<br/>[perrl_num] = '2' or [perrl_num] = '3' or [perrl_num] = '4' or [perrl_num] = '5'</p>                             | <p>Record the date and time of the second instance of return to normal pupil size.</p>                                                            | <p><b>text (datetime_mdy), Required</b></p>                                                                                                                                                                                                   |   |     |   |    |   |   |   |   |   |   |   |   |
| 503 | <p><b>postbup_perrl_mm_2</b></p> <p>Show the field ONLY if:<br/>[perrl_num] = '2' or [perrl_num] = '3' or [perrl_num] = '4' or [perrl_num] = '5'</p>                      | <p>Pupil measurement listed?</p>                                                                                                                  | <p><b>yesno, Required</b></p> <table border="1"> <tr><td>1</td><td>Yes</td></tr> <tr><td>0</td><td>No</td></tr> </table>                                                                                                                      | 1 | Yes | 0 | No |   |   |   |   |   |   |   |   |
| 1   | Yes                                                                                                                                                                       |                                                                                                                                                   |                                                                                                                                                                                                                                               |   |     |   |    |   |   |   |   |   |   |   |   |
| 0   | No                                                                                                                                                                        |                                                                                                                                                   |                                                                                                                                                                                                                                               |   |     |   |    |   |   |   |   |   |   |   |   |
| 504 | <p><b>postbup_perrl_size_2</b></p> <p>Show the field ONLY if:<br/>[postbup_perrl_mm_2] = '1'</p>                                                                          | <p>Please enter the pupil size measured (in mm)</p>                                                                                               | <p><b>text, Required</b></p>                                                                                                                                                                                                                  |   |     |   |    |   |   |   |   |   |   |   |   |
| 505 | <p><b>perrl_time3</b></p> <p>Show the field ONLY if:<br/>[perrl_num] = '3' or [perrl_num] = '4' or [perrl_num] = '5'</p>                                                  | <p>Record the date and time of the third instance of return to normal pupil size.</p>                                                             | <p><b>text (datetime_mdy), Required</b></p>                                                                                                                                                                                                   |   |     |   |    |   |   |   |   |   |   |   |   |

|                           |                                                                                                                                   |                                                                                                                                                                                                                            |                                                                                                                                                                                                                                                                                                                                                                                                                                                                        |  |                           |     |                |    |                 |  |   |                 |                                                 |   |                 |                                                |   |                 |                          |
|---------------------------|-----------------------------------------------------------------------------------------------------------------------------------|----------------------------------------------------------------------------------------------------------------------------------------------------------------------------------------------------------------------------|------------------------------------------------------------------------------------------------------------------------------------------------------------------------------------------------------------------------------------------------------------------------------------------------------------------------------------------------------------------------------------------------------------------------------------------------------------------------|--|---------------------------|-----|----------------|----|-----------------|--|---|-----------------|-------------------------------------------------|---|-----------------|------------------------------------------------|---|-----------------|--------------------------|
| 506                       | <b>postbup_perri_mm_3</b><br><b>Show the field ONLY if:</b><br><b>[perri_num] = '3' or [perri_num] = '4' or [perri_num] = '5'</b> | <b>Pupil measurement listed?</b>                                                                                                                                                                                           | <b>yesno, Required</b><br><table border="1"> <tr> <td>1</td> <td>Yes</td> </tr> <tr> <td>0</td> <td>No</td> </tr> </table>                                                                                                                                                                                                                                                                                                                                             |  | 1                         | Yes | 0              | No |                 |  |   |                 |                                                 |   |                 |                                                |   |                 |                          |
| 1                         | Yes                                                                                                                               |                                                                                                                                                                                                                            |                                                                                                                                                                                                                                                                                                                                                                                                                                                                        |  |                           |     |                |    |                 |  |   |                 |                                                 |   |                 |                                                |   |                 |                          |
| 0                         | No                                                                                                                                |                                                                                                                                                                                                                            |                                                                                                                                                                                                                                                                                                                                                                                                                                                                        |  |                           |     |                |    |                 |  |   |                 |                                                 |   |                 |                                                |   |                 |                          |
| 507                       | <b>postbup_perri_size_3</b><br><b>Show the field ONLY if:</b><br><b>[postbup_perri_mm_3] = '1'</b>                                | <b>Please enter the pupil size measured (in mm)</b>                                                                                                                                                                        | <b>text, Required</b>                                                                                                                                                                                                                                                                                                                                                                                                                                                  |  |                           |     |                |    |                 |  |   |                 |                                                 |   |                 |                                                |   |                 |                          |
| 508                       | <b>perri_time4</b><br><b>Show the field ONLY if:</b><br><b>[perri_num] = '4' or [perri_num] = '5'</b>                             | <b>Record the date and time of the fourth instance of return to normal pupil size.</b>                                                                                                                                     | <b>text (datetime_mdy), Required</b>                                                                                                                                                                                                                                                                                                                                                                                                                                   |  |                           |     |                |    |                 |  |   |                 |                                                 |   |                 |                                                |   |                 |                          |
| 509                       | <b>postbup_perri_mm_4</b><br><b>Show the field ONLY if:</b><br><b>[perri_num] = '4' or [perri_num] = '5'</b>                      | <b>Pupil measurement listed?</b>                                                                                                                                                                                           | <b>yesno, Required</b><br><table border="1"> <tr> <td>1</td> <td>Yes</td> </tr> <tr> <td>0</td> <td>No</td> </tr> </table>                                                                                                                                                                                                                                                                                                                                             |  | 1                         | Yes | 0              | No |                 |  |   |                 |                                                 |   |                 |                                                |   |                 |                          |
| 1                         | Yes                                                                                                                               |                                                                                                                                                                                                                            |                                                                                                                                                                                                                                                                                                                                                                                                                                                                        |  |                           |     |                |    |                 |  |   |                 |                                                 |   |                 |                                                |   |                 |                          |
| 0                         | No                                                                                                                                |                                                                                                                                                                                                                            |                                                                                                                                                                                                                                                                                                                                                                                                                                                                        |  |                           |     |                |    |                 |  |   |                 |                                                 |   |                 |                                                |   |                 |                          |
| 510                       | <b>postbup_perri_size_4</b><br><b>Show the field ONLY if:</b><br><b>[postbup_perri_mm_4] = '1'</b>                                | <b>Please enter the pupil size measured (in mm)</b>                                                                                                                                                                        | <b>text, Required</b>                                                                                                                                                                                                                                                                                                                                                                                                                                                  |  |                           |     |                |    |                 |  |   |                 |                                                 |   |                 |                                                |   |                 |                          |
| 511                       | <b>perri_time5</b><br><b>Show the field ONLY if:</b><br><b>[perri_num] = '5'</b>                                                  | <b>Record the date and time of the fifth instance of return to normal pupil size.</b>                                                                                                                                      | <b>text (datetime_mdy), Required</b>                                                                                                                                                                                                                                                                                                                                                                                                                                   |  |                           |     |                |    |                 |  |   |                 |                                                 |   |                 |                                                |   |                 |                          |
| 512                       | <b>postbup_perri_mm_5</b><br><b>Show the field ONLY if:</b><br><b>[perri_num] = '5'</b>                                           | <b>Pupil measurement listed?</b>                                                                                                                                                                                           | <b>yesno, Required</b><br><table border="1"> <tr> <td>1</td> <td>Yes</td> </tr> <tr> <td>0</td> <td>No</td> </tr> </table>                                                                                                                                                                                                                                                                                                                                             |  | 1                         | Yes | 0              | No |                 |  |   |                 |                                                 |   |                 |                                                |   |                 |                          |
| 1                         | Yes                                                                                                                               |                                                                                                                                                                                                                            |                                                                                                                                                                                                                                                                                                                                                                                                                                                                        |  |                           |     |                |    |                 |  |   |                 |                                                 |   |                 |                                                |   |                 |                          |
| 0                         | No                                                                                                                                |                                                                                                                                                                                                                            |                                                                                                                                                                                                                                                                                                                                                                                                                                                                        |  |                           |     |                |    |                 |  |   |                 |                                                 |   |                 |                                                |   |                 |                          |
| 513                       | <b>postbup_perri_size_5</b><br><b>Show the field ONLY if:</b><br><b>[postbup_perri_mm_5] = '1'</b>                                | <b>Please enter the pupil size measured (in mm)</b>                                                                                                                                                                        | <b>text, Required</b>                                                                                                                                                                                                                                                                                                                                                                                                                                                  |  |                           |     |                |    |                 |  |   |                 |                                                 |   |                 |                                                |   |                 |                          |
| 514                       | <b>late_ss</b>                                                                                                                    | <b>Section Header:</b> <i>Late-Developed Signs and Symptoms</i><br><b>Did any of the above signs or symptoms newly develop after the first 6 hours following first buprenorphine administration until discharge?</b>       | <b>yesno, Required</b><br><table border="1"> <tr> <td>1</td> <td>Yes</td> </tr> <tr> <td>0</td> <td>No</td> </tr> </table>                                                                                                                                                                                                                                                                                                                                             |  | 1                         | Yes | 0              | No |                 |  |   |                 |                                                 |   |                 |                                                |   |                 |                          |
| 1                         | Yes                                                                                                                               |                                                                                                                                                                                                                            |                                                                                                                                                                                                                                                                                                                                                                                                                                                                        |  |                           |     |                |    |                 |  |   |                 |                                                 |   |                 |                                                |   |                 |                          |
| 0                         | No                                                                                                                                |                                                                                                                                                                                                                            |                                                                                                                                                                                                                                                                                                                                                                                                                                                                        |  |                           |     |                |    |                 |  |   |                 |                                                 |   |                 |                                                |   |                 |                          |
| 515                       | <b>late_sedation</b><br><b>Show the field ONLY if:</b><br><b>[late_ss] = '1'</b>                                                  | <b>Section Header:</b> <i>Late-Developed Sedation</i><br><b>Which of the following signs or symptoms of sedation were documented after the first 6 hours following first buprenorphine administration until discharge?</b> | <table border="1"> <tr> <td colspan="2"><b>checkbox, Required</b></td> <td><b>Nodding</b></td> </tr> <tr> <td>1</td> <td>late_sedation_1</td> <td></td> </tr> <tr> <td>2</td> <td>late_sedation_2</td> <td><b>Sleepy, drowsy, difficulty staying awake</b></td> </tr> <tr> <td>3</td> <td>late_sedation_3</td> <td><b>Feelings of general fatigue or weakness</b></td> </tr> <tr> <td>0</td> <td>late_sedation_0</td> <td><b>None of the above</b></td> </tr> </table> |  | <b>checkbox, Required</b> |     | <b>Nodding</b> | 1  | late_sedation_1 |  | 2 | late_sedation_2 | <b>Sleepy, drowsy, difficulty staying awake</b> | 3 | late_sedation_3 | <b>Feelings of general fatigue or weakness</b> | 0 | late_sedation_0 | <b>None of the above</b> |
| <b>checkbox, Required</b> |                                                                                                                                   | <b>Nodding</b>                                                                                                                                                                                                             |                                                                                                                                                                                                                                                                                                                                                                                                                                                                        |  |                           |     |                |    |                 |  |   |                 |                                                 |   |                 |                                                |   |                 |                          |
| 1                         | late_sedation_1                                                                                                                   |                                                                                                                                                                                                                            |                                                                                                                                                                                                                                                                                                                                                                                                                                                                        |  |                           |     |                |    |                 |  |   |                 |                                                 |   |                 |                                                |   |                 |                          |
| 2                         | late_sedation_2                                                                                                                   | <b>Sleepy, drowsy, difficulty staying awake</b>                                                                                                                                                                            |                                                                                                                                                                                                                                                                                                                                                                                                                                                                        |  |                           |     |                |    |                 |  |   |                 |                                                 |   |                 |                                                |   |                 |                          |
| 3                         | late_sedation_3                                                                                                                   | <b>Feelings of general fatigue or weakness</b>                                                                                                                                                                             |                                                                                                                                                                                                                                                                                                                                                                                                                                                                        |  |                           |     |                |    |                 |  |   |                 |                                                 |   |                 |                                                |   |                 |                          |
| 0                         | late_sedation_0                                                                                                                   | <b>None of the above</b>                                                                                                                                                                                                   |                                                                                                                                                                                                                                                                                                                                                                                                                                                                        |  |                           |     |                |    |                 |  |   |                 |                                                 |   |                 |                                                |   |                 |                          |

|     |                                                                                     |                                                                                                                                                                                                                                        |                                                                                                                                                                                                                                                                                                                                                                                                                                                                                                                                                                                                                                                                                                                                                                                                                                                                                                                                                                                             |   |                |                                     |   |                |                                            |   |                |               |   |                |                |   |                |                   |   |              |                   |   |              |                     |   |              |      |   |              |          |    |               |         |    |               |                          |    |               |                              |    |               |                  |   |              |                   |
|-----|-------------------------------------------------------------------------------------|----------------------------------------------------------------------------------------------------------------------------------------------------------------------------------------------------------------------------------------|---------------------------------------------------------------------------------------------------------------------------------------------------------------------------------------------------------------------------------------------------------------------------------------------------------------------------------------------------------------------------------------------------------------------------------------------------------------------------------------------------------------------------------------------------------------------------------------------------------------------------------------------------------------------------------------------------------------------------------------------------------------------------------------------------------------------------------------------------------------------------------------------------------------------------------------------------------------------------------------------|---|----------------|-------------------------------------|---|----------------|--------------------------------------------|---|----------------|---------------|---|----------------|----------------|---|----------------|-------------------|---|--------------|-------------------|---|--------------|---------------------|---|--------------|------|---|--------------|----------|----|---------------|---------|----|---------------|--------------------------|----|---------------|------------------------------|----|---------------|------------------|---|--------------|-------------------|
| 516 | <b>late_intox</b><br><br><b>Show the field ONLY if:</b><br><b>[late_ss] = '1'</b>   | <b>Section Header:</b> <i>Late-Developed Intoxication</i><br><br><b>Which of the following signs or symptoms of intoxication were documented after the first 6 hours following first buprenorphine administration until discharge?</b> | <b>checkbox, Required</b><br><table border="1"> <tr><td>1</td><td>late_intox_1</td><td>Good mood</td></tr> <tr><td>2</td><td>late_intox_2</td><td>Coasting (Spaced out)</td></tr> <tr><td>3</td><td>late_intox_3</td><td>Pleasant Sick</td></tr> <tr><td>4</td><td>late_intox_4</td><td>Drive (energy)</td></tr> <tr><td>5</td><td>late_intox_5</td><td>High</td></tr> <tr><td>6</td><td>late_intox_6</td><td>Drunken</td></tr> <tr><td>7</td><td>late_intox_7</td><td>Soapbox (talkative)</td></tr> <tr><td>8</td><td>late_intox_8</td><td>Rush</td></tr> <tr><td>9</td><td>late_intox_9</td><td>Friendly</td></tr> <tr><td>10</td><td>late_intox_10</td><td>Relaxed</td></tr> <tr><td>11</td><td>late_intox_11</td><td>Difficulty concentrating</td></tr> <tr><td>12</td><td>late_intox_12</td><td>Feeling lightheaded or dizzy</td></tr> <tr><td>13</td><td>late_intox_13</td><td>Feeling confused</td></tr> <tr><td>0</td><td>late_intox_0</td><td>None of the above</td></tr> </table> | 1 | late_intox_1   | Good mood                           | 2 | late_intox_2   | Coasting (Spaced out)                      | 3 | late_intox_3   | Pleasant Sick | 4 | late_intox_4   | Drive (energy) | 5 | late_intox_5   | High              | 6 | late_intox_6 | Drunken           | 7 | late_intox_7 | Soapbox (talkative) | 8 | late_intox_8 | Rush | 9 | late_intox_9 | Friendly | 10 | late_intox_10 | Relaxed | 11 | late_intox_11 | Difficulty concentrating | 12 | late_intox_12 | Feeling lightheaded or dizzy | 13 | late_intox_13 | Feeling confused | 0 | late_intox_0 | None of the above |
| 1   | late_intox_1                                                                        | Good mood                                                                                                                                                                                                                              |                                                                                                                                                                                                                                                                                                                                                                                                                                                                                                                                                                                                                                                                                                                                                                                                                                                                                                                                                                                             |   |                |                                     |   |                |                                            |   |                |               |   |                |                |   |                |                   |   |              |                   |   |              |                     |   |              |      |   |              |          |    |               |         |    |               |                          |    |               |                              |    |               |                  |   |              |                   |
| 2   | late_intox_2                                                                        | Coasting (Spaced out)                                                                                                                                                                                                                  |                                                                                                                                                                                                                                                                                                                                                                                                                                                                                                                                                                                                                                                                                                                                                                                                                                                                                                                                                                                             |   |                |                                     |   |                |                                            |   |                |               |   |                |                |   |                |                   |   |              |                   |   |              |                     |   |              |      |   |              |          |    |               |         |    |               |                          |    |               |                              |    |               |                  |   |              |                   |
| 3   | late_intox_3                                                                        | Pleasant Sick                                                                                                                                                                                                                          |                                                                                                                                                                                                                                                                                                                                                                                                                                                                                                                                                                                                                                                                                                                                                                                                                                                                                                                                                                                             |   |                |                                     |   |                |                                            |   |                |               |   |                |                |   |                |                   |   |              |                   |   |              |                     |   |              |      |   |              |          |    |               |         |    |               |                          |    |               |                              |    |               |                  |   |              |                   |
| 4   | late_intox_4                                                                        | Drive (energy)                                                                                                                                                                                                                         |                                                                                                                                                                                                                                                                                                                                                                                                                                                                                                                                                                                                                                                                                                                                                                                                                                                                                                                                                                                             |   |                |                                     |   |                |                                            |   |                |               |   |                |                |   |                |                   |   |              |                   |   |              |                     |   |              |      |   |              |          |    |               |         |    |               |                          |    |               |                              |    |               |                  |   |              |                   |
| 5   | late_intox_5                                                                        | High                                                                                                                                                                                                                                   |                                                                                                                                                                                                                                                                                                                                                                                                                                                                                                                                                                                                                                                                                                                                                                                                                                                                                                                                                                                             |   |                |                                     |   |                |                                            |   |                |               |   |                |                |   |                |                   |   |              |                   |   |              |                     |   |              |      |   |              |          |    |               |         |    |               |                          |    |               |                              |    |               |                  |   |              |                   |
| 6   | late_intox_6                                                                        | Drunken                                                                                                                                                                                                                                |                                                                                                                                                                                                                                                                                                                                                                                                                                                                                                                                                                                                                                                                                                                                                                                                                                                                                                                                                                                             |   |                |                                     |   |                |                                            |   |                |               |   |                |                |   |                |                   |   |              |                   |   |              |                     |   |              |      |   |              |          |    |               |         |    |               |                          |    |               |                              |    |               |                  |   |              |                   |
| 7   | late_intox_7                                                                        | Soapbox (talkative)                                                                                                                                                                                                                    |                                                                                                                                                                                                                                                                                                                                                                                                                                                                                                                                                                                                                                                                                                                                                                                                                                                                                                                                                                                             |   |                |                                     |   |                |                                            |   |                |               |   |                |                |   |                |                   |   |              |                   |   |              |                     |   |              |      |   |              |          |    |               |         |    |               |                          |    |               |                              |    |               |                  |   |              |                   |
| 8   | late_intox_8                                                                        | Rush                                                                                                                                                                                                                                   |                                                                                                                                                                                                                                                                                                                                                                                                                                                                                                                                                                                                                                                                                                                                                                                                                                                                                                                                                                                             |   |                |                                     |   |                |                                            |   |                |               |   |                |                |   |                |                   |   |              |                   |   |              |                     |   |              |      |   |              |          |    |               |         |    |               |                          |    |               |                              |    |               |                  |   |              |                   |
| 9   | late_intox_9                                                                        | Friendly                                                                                                                                                                                                                               |                                                                                                                                                                                                                                                                                                                                                                                                                                                                                                                                                                                                                                                                                                                                                                                                                                                                                                                                                                                             |   |                |                                     |   |                |                                            |   |                |               |   |                |                |   |                |                   |   |              |                   |   |              |                     |   |              |      |   |              |          |    |               |         |    |               |                          |    |               |                              |    |               |                  |   |              |                   |
| 10  | late_intox_10                                                                       | Relaxed                                                                                                                                                                                                                                |                                                                                                                                                                                                                                                                                                                                                                                                                                                                                                                                                                                                                                                                                                                                                                                                                                                                                                                                                                                             |   |                |                                     |   |                |                                            |   |                |               |   |                |                |   |                |                   |   |              |                   |   |              |                     |   |              |      |   |              |          |    |               |         |    |               |                          |    |               |                              |    |               |                  |   |              |                   |
| 11  | late_intox_11                                                                       | Difficulty concentrating                                                                                                                                                                                                               |                                                                                                                                                                                                                                                                                                                                                                                                                                                                                                                                                                                                                                                                                                                                                                                                                                                                                                                                                                                             |   |                |                                     |   |                |                                            |   |                |               |   |                |                |   |                |                   |   |              |                   |   |              |                     |   |              |      |   |              |          |    |               |         |    |               |                          |    |               |                              |    |               |                  |   |              |                   |
| 12  | late_intox_12                                                                       | Feeling lightheaded or dizzy                                                                                                                                                                                                           |                                                                                                                                                                                                                                                                                                                                                                                                                                                                                                                                                                                                                                                                                                                                                                                                                                                                                                                                                                                             |   |                |                                     |   |                |                                            |   |                |               |   |                |                |   |                |                   |   |              |                   |   |              |                     |   |              |      |   |              |          |    |               |         |    |               |                          |    |               |                              |    |               |                  |   |              |                   |
| 13  | late_intox_13                                                                       | Feeling confused                                                                                                                                                                                                                       |                                                                                                                                                                                                                                                                                                                                                                                                                                                                                                                                                                                                                                                                                                                                                                                                                                                                                                                                                                                             |   |                |                                     |   |                |                                            |   |                |               |   |                |                |   |                |                   |   |              |                   |   |              |                     |   |              |      |   |              |          |    |               |         |    |               |                          |    |               |                              |    |               |                  |   |              |                   |
| 0   | late_intox_0                                                                        | None of the above                                                                                                                                                                                                                      |                                                                                                                                                                                                                                                                                                                                                                                                                                                                                                                                                                                                                                                                                                                                                                                                                                                                                                                                                                                             |   |                |                                     |   |                |                                            |   |                |               |   |                |                |   |                |                   |   |              |                   |   |              |                     |   |              |      |   |              |          |    |               |         |    |               |                          |    |               |                              |    |               |                  |   |              |                   |
| 517 | <b>late_gi</b><br><br><b>Show the field ONLY if:</b><br><b>[late_ss] = '1'</b>      | <b>Section Header:</b> <i>Late-Developed GI Symptoms</i><br><br><b>Which of the following gastrointestinal signs or symptoms were documented after the first 6 hours following first buprenorphine administration until discharge?</b> | <b>checkbox, Required</b><br><table border="1"> <tr><td>1</td><td>late_gi_1</td><td>Constipation</td></tr> <tr><td>2</td><td>late_gi_2</td><td>Turning of stomach/cramping/abdominal pain</td></tr> <tr><td>3</td><td>late_gi_3</td><td>Nausea</td></tr> <tr><td>4</td><td>late_gi_4</td><td>Vomiting</td></tr> <tr><td>5</td><td>late_gi_5</td><td>Diarrhea</td></tr> <tr><td>0</td><td>late_gi_0</td><td>None of the above</td></tr> </table>                                                                                                                                                                                                                                                                                                                                                                                                                                                                                                                                             | 1 | late_gi_1      | Constipation                        | 2 | late_gi_2      | Turning of stomach/cramping/abdominal pain | 3 | late_gi_3      | Nausea        | 4 | late_gi_4      | Vomiting       | 5 | late_gi_5      | Diarrhea          | 0 | late_gi_0    | None of the above |   |              |                     |   |              |      |   |              |          |    |               |         |    |               |                          |    |               |                              |    |               |                  |   |              |                   |
| 1   | late_gi_1                                                                           | Constipation                                                                                                                                                                                                                           |                                                                                                                                                                                                                                                                                                                                                                                                                                                                                                                                                                                                                                                                                                                                                                                                                                                                                                                                                                                             |   |                |                                     |   |                |                                            |   |                |               |   |                |                |   |                |                   |   |              |                   |   |              |                     |   |              |      |   |              |          |    |               |         |    |               |                          |    |               |                              |    |               |                  |   |              |                   |
| 2   | late_gi_2                                                                           | Turning of stomach/cramping/abdominal pain                                                                                                                                                                                             |                                                                                                                                                                                                                                                                                                                                                                                                                                                                                                                                                                                                                                                                                                                                                                                                                                                                                                                                                                                             |   |                |                                     |   |                |                                            |   |                |               |   |                |                |   |                |                   |   |              |                   |   |              |                     |   |              |      |   |              |          |    |               |         |    |               |                          |    |               |                              |    |               |                  |   |              |                   |
| 3   | late_gi_3                                                                           | Nausea                                                                                                                                                                                                                                 |                                                                                                                                                                                                                                                                                                                                                                                                                                                                                                                                                                                                                                                                                                                                                                                                                                                                                                                                                                                             |   |                |                                     |   |                |                                            |   |                |               |   |                |                |   |                |                   |   |              |                   |   |              |                     |   |              |      |   |              |          |    |               |         |    |               |                          |    |               |                              |    |               |                  |   |              |                   |
| 4   | late_gi_4                                                                           | Vomiting                                                                                                                                                                                                                               |                                                                                                                                                                                                                                                                                                                                                                                                                                                                                                                                                                                                                                                                                                                                                                                                                                                                                                                                                                                             |   |                |                                     |   |                |                                            |   |                |               |   |                |                |   |                |                   |   |              |                   |   |              |                     |   |              |      |   |              |          |    |               |         |    |               |                          |    |               |                              |    |               |                  |   |              |                   |
| 5   | late_gi_5                                                                           | Diarrhea                                                                                                                                                                                                                               |                                                                                                                                                                                                                                                                                                                                                                                                                                                                                                                                                                                                                                                                                                                                                                                                                                                                                                                                                                                             |   |                |                                     |   |                |                                            |   |                |               |   |                |                |   |                |                   |   |              |                   |   |              |                     |   |              |      |   |              |          |    |               |         |    |               |                          |    |               |                              |    |               |                  |   |              |                   |
| 0   | late_gi_0                                                                           | None of the above                                                                                                                                                                                                                      |                                                                                                                                                                                                                                                                                                                                                                                                                                                                                                                                                                                                                                                                                                                                                                                                                                                                                                                                                                                             |   |                |                                     |   |                |                                            |   |                |               |   |                |                |   |                |                   |   |              |                   |   |              |                     |   |              |      |   |              |          |    |               |         |    |               |                          |    |               |                              |    |               |                  |   |              |                   |
| 518 | <b>late_anxious</b><br><br><b>Show the field ONLY if:</b><br><b>[late_ss] = '1'</b> | <b>Section Header:</b> <i>Late-Developed Anxiety</i><br><br><b>Which of the following signs or symptoms of anxiety were documented after the first 6 hours following first buprenorphine administration until discharge?</b>           | <b>checkbox, Required</b><br><table border="1"> <tr><td>1</td><td>late_anxious_1</td><td>Anxiety, irritability, or agitation</td></tr> <tr><td>2</td><td>late_anxious_2</td><td>Nervousness</td></tr> <tr><td>3</td><td>late_anxious_3</td><td>Tremor</td></tr> <tr><td>4</td><td>late_anxious_4</td><td>Restlessness</td></tr> <tr><td>0</td><td>late_anxious_0</td><td>None of the above</td></tr> </table>                                                                                                                                                                                                                                                                                                                                                                                                                                                                                                                                                                               | 1 | late_anxious_1 | Anxiety, irritability, or agitation | 2 | late_anxious_2 | Nervousness                                | 3 | late_anxious_3 | Tremor        | 4 | late_anxious_4 | Restlessness   | 0 | late_anxious_0 | None of the above |   |              |                   |   |              |                     |   |              |      |   |              |          |    |               |         |    |               |                          |    |               |                              |    |               |                  |   |              |                   |
| 1   | late_anxious_1                                                                      | Anxiety, irritability, or agitation                                                                                                                                                                                                    |                                                                                                                                                                                                                                                                                                                                                                                                                                                                                                                                                                                                                                                                                                                                                                                                                                                                                                                                                                                             |   |                |                                     |   |                |                                            |   |                |               |   |                |                |   |                |                   |   |              |                   |   |              |                     |   |              |      |   |              |          |    |               |         |    |               |                          |    |               |                              |    |               |                  |   |              |                   |
| 2   | late_anxious_2                                                                      | Nervousness                                                                                                                                                                                                                            |                                                                                                                                                                                                                                                                                                                                                                                                                                                                                                                                                                                                                                                                                                                                                                                                                                                                                                                                                                                             |   |                |                                     |   |                |                                            |   |                |               |   |                |                |   |                |                   |   |              |                   |   |              |                     |   |              |      |   |              |          |    |               |         |    |               |                          |    |               |                              |    |               |                  |   |              |                   |
| 3   | late_anxious_3                                                                      | Tremor                                                                                                                                                                                                                                 |                                                                                                                                                                                                                                                                                                                                                                                                                                                                                                                                                                                                                                                                                                                                                                                                                                                                                                                                                                                             |   |                |                                     |   |                |                                            |   |                |               |   |                |                |   |                |                   |   |              |                   |   |              |                     |   |              |      |   |              |          |    |               |         |    |               |                          |    |               |                              |    |               |                  |   |              |                   |
| 4   | late_anxious_4                                                                      | Restlessness                                                                                                                                                                                                                           |                                                                                                                                                                                                                                                                                                                                                                                                                                                                                                                                                                                                                                                                                                                                                                                                                                                                                                                                                                                             |   |                |                                     |   |                |                                            |   |                |               |   |                |                |   |                |                   |   |              |                   |   |              |                     |   |              |      |   |              |          |    |               |         |    |               |                          |    |               |                              |    |               |                  |   |              |                   |
| 0   | late_anxious_0                                                                      | None of the above                                                                                                                                                                                                                      |                                                                                                                                                                                                                                                                                                                                                                                                                                                                                                                                                                                                                                                                                                                                                                                                                                                                                                                                                                                             |   |                |                                     |   |                |                                            |   |                |               |   |                |                |   |                |                   |   |              |                   |   |              |                     |   |              |      |   |              |          |    |               |         |    |               |                          |    |               |                              |    |               |                  |   |              |                   |

|     |                                                                                        |                                                                                                                                                                                                                                                                             |                                                                                                                                                                                                                                                                                                                                                                                                                                                                                                                                                                                                                                                                                                                                                                                                         |   |                   |                          |    |                   |                                       |   |                   |             |   |                   |                        |   |                   |                                                    |   |                   |                                                         |   |                   |                                                      |   |                   |                   |
|-----|----------------------------------------------------------------------------------------|-----------------------------------------------------------------------------------------------------------------------------------------------------------------------------------------------------------------------------------------------------------------------------|---------------------------------------------------------------------------------------------------------------------------------------------------------------------------------------------------------------------------------------------------------------------------------------------------------------------------------------------------------------------------------------------------------------------------------------------------------------------------------------------------------------------------------------------------------------------------------------------------------------------------------------------------------------------------------------------------------------------------------------------------------------------------------------------------------|---|-------------------|--------------------------|----|-------------------|---------------------------------------|---|-------------------|-------------|---|-------------------|------------------------|---|-------------------|----------------------------------------------------|---|-------------------|---------------------------------------------------------|---|-------------------|------------------------------------------------------|---|-------------------|-------------------|
| 519 | <b>late_withdrawal</b><br><br><b>Show the field ONLY if:</b><br><b>[late_ss] = '1'</b> | <b>Section Header:</b> <i>Late-Developed Withdrawal</i><br><br><b>Which of the following signs or symptoms of withdrawal were documented after the first 6 hours following first buprenorphine administration until discharge?</b>                                          | <b>checkbox, Required</b><br><table border="1"> <tr> <td>1</td> <td>late_withdrawal_1</td> <td>Yawning</td> </tr> <tr> <td>2</td> <td>late_withdrawal_2</td> <td>Gooseflesh skin (chills/piloerection)</td> </tr> <tr> <td>3</td> <td>late_withdrawal_3</td> <td>Pulse &gt; 80</td> </tr> <tr> <td>4</td> <td>late_withdrawal_4</td> <td>Sweating (diaphoresis)</td> </tr> <tr> <td>5</td> <td>late_withdrawal_5</td> <td>Pupil size larger than normal (dilation/mydriasis)</td> </tr> <tr> <td>6</td> <td>late_withdrawal_6</td> <td>Bone, joint aches, or body aches (arthralgias/myalgias)</td> </tr> <tr> <td>7</td> <td>late_withdrawal_7</td> <td>Runny nose or tearing (rhinorrhea/lacrimation)</td> </tr> <tr> <td>0</td> <td>late_withdrawal_0</td> <td>None of the above</td> </tr> </table> | 1 | late_withdrawal_1 | Yawning                  | 2  | late_withdrawal_2 | Gooseflesh skin (chills/piloerection) | 3 | late_withdrawal_3 | Pulse > 80  | 4 | late_withdrawal_4 | Sweating (diaphoresis) | 5 | late_withdrawal_5 | Pupil size larger than normal (dilation/mydriasis) | 6 | late_withdrawal_6 | Bone, joint aches, or body aches (arthralgias/myalgias) | 7 | late_withdrawal_7 | Runny nose or tearing (rhinorrhea/lacrimation)       | 0 | late_withdrawal_0 | None of the above |
| 1   | late_withdrawal_1                                                                      | Yawning                                                                                                                                                                                                                                                                     |                                                                                                                                                                                                                                                                                                                                                                                                                                                                                                                                                                                                                                                                                                                                                                                                         |   |                   |                          |    |                   |                                       |   |                   |             |   |                   |                        |   |                   |                                                    |   |                   |                                                         |   |                   |                                                      |   |                   |                   |
| 2   | late_withdrawal_2                                                                      | Gooseflesh skin (chills/piloerection)                                                                                                                                                                                                                                       |                                                                                                                                                                                                                                                                                                                                                                                                                                                                                                                                                                                                                                                                                                                                                                                                         |   |                   |                          |    |                   |                                       |   |                   |             |   |                   |                        |   |                   |                                                    |   |                   |                                                         |   |                   |                                                      |   |                   |                   |
| 3   | late_withdrawal_3                                                                      | Pulse > 80                                                                                                                                                                                                                                                                  |                                                                                                                                                                                                                                                                                                                                                                                                                                                                                                                                                                                                                                                                                                                                                                                                         |   |                   |                          |    |                   |                                       |   |                   |             |   |                   |                        |   |                   |                                                    |   |                   |                                                         |   |                   |                                                      |   |                   |                   |
| 4   | late_withdrawal_4                                                                      | Sweating (diaphoresis)                                                                                                                                                                                                                                                      |                                                                                                                                                                                                                                                                                                                                                                                                                                                                                                                                                                                                                                                                                                                                                                                                         |   |                   |                          |    |                   |                                       |   |                   |             |   |                   |                        |   |                   |                                                    |   |                   |                                                         |   |                   |                                                      |   |                   |                   |
| 5   | late_withdrawal_5                                                                      | Pupil size larger than normal (dilation/mydriasis)                                                                                                                                                                                                                          |                                                                                                                                                                                                                                                                                                                                                                                                                                                                                                                                                                                                                                                                                                                                                                                                         |   |                   |                          |    |                   |                                       |   |                   |             |   |                   |                        |   |                   |                                                    |   |                   |                                                         |   |                   |                                                      |   |                   |                   |
| 6   | late_withdrawal_6                                                                      | Bone, joint aches, or body aches (arthralgias/myalgias)                                                                                                                                                                                                                     |                                                                                                                                                                                                                                                                                                                                                                                                                                                                                                                                                                                                                                                                                                                                                                                                         |   |                   |                          |    |                   |                                       |   |                   |             |   |                   |                        |   |                   |                                                    |   |                   |                                                         |   |                   |                                                      |   |                   |                   |
| 7   | late_withdrawal_7                                                                      | Runny nose or tearing (rhinorrhea/lacrimation)                                                                                                                                                                                                                              |                                                                                                                                                                                                                                                                                                                                                                                                                                                                                                                                                                                                                                                                                                                                                                                                         |   |                   |                          |    |                   |                                       |   |                   |             |   |                   |                        |   |                   |                                                    |   |                   |                                                         |   |                   |                                                      |   |                   |                   |
| 0   | late_withdrawal_0                                                                      | None of the above                                                                                                                                                                                                                                                           |                                                                                                                                                                                                                                                                                                                                                                                                                                                                                                                                                                                                                                                                                                                                                                                                         |   |                   |                          |    |                   |                                       |   |                   |             |   |                   |                        |   |                   |                                                    |   |                   |                                                         |   |                   |                                                      |   |                   |                   |
| 520 | <b>late_vitals</b><br><br><b>Show the field ONLY if:</b><br><b>[late_ss] = '1'</b>     | <b>Section Header:</b> <i>Late-Developed Abnormal Vital Signs</i><br><br><b>Which of the following abnormal vital signs were documented after the first 6 hours following first buprenorphine administration until discharge?</b>                                           | <b>checkbox, Required</b><br><table border="1"> <tr> <td>1</td> <td>late_vitals_1</td> <td>Hypoxia</td> </tr> <tr> <td>2</td> <td>late_vitals_2</td> <td>Hypercarbia</td> </tr> <tr> <td>3</td> <td>late_vitals_3</td> <td>Hypotension</td> </tr> <tr> <td>4</td> <td>late_vitals_4</td> <td>Bradycardia</td> </tr> <tr> <td>0</td> <td>late_vitals_0</td> <td>None of the above</td> </tr> </table>                                                                                                                                                                                                                                                                                                                                                                                                    | 1 | late_vitals_1     | Hypoxia                  | 2  | late_vitals_2     | Hypercarbia                           | 3 | late_vitals_3     | Hypotension | 4 | late_vitals_4     | Bradycardia            | 0 | late_vitals_0     | None of the above                                  |   |                   |                                                         |   |                   |                                                      |   |                   |                   |
| 1   | late_vitals_1                                                                          | Hypoxia                                                                                                                                                                                                                                                                     |                                                                                                                                                                                                                                                                                                                                                                                                                                                                                                                                                                                                                                                                                                                                                                                                         |   |                   |                          |    |                   |                                       |   |                   |             |   |                   |                        |   |                   |                                                    |   |                   |                                                         |   |                   |                                                      |   |                   |                   |
| 2   | late_vitals_2                                                                          | Hypercarbia                                                                                                                                                                                                                                                                 |                                                                                                                                                                                                                                                                                                                                                                                                                                                                                                                                                                                                                                                                                                                                                                                                         |   |                   |                          |    |                   |                                       |   |                   |             |   |                   |                        |   |                   |                                                    |   |                   |                                                         |   |                   |                                                      |   |                   |                   |
| 3   | late_vitals_3                                                                          | Hypotension                                                                                                                                                                                                                                                                 |                                                                                                                                                                                                                                                                                                                                                                                                                                                                                                                                                                                                                                                                                                                                                                                                         |   |                   |                          |    |                   |                                       |   |                   |             |   |                   |                        |   |                   |                                                    |   |                   |                                                         |   |                   |                                                      |   |                   |                   |
| 4   | late_vitals_4                                                                          | Bradycardia                                                                                                                                                                                                                                                                 |                                                                                                                                                                                                                                                                                                                                                                                                                                                                                                                                                                                                                                                                                                                                                                                                         |   |                   |                          |    |                   |                                       |   |                   |             |   |                   |                        |   |                   |                                                    |   |                   |                                                         |   |                   |                                                      |   |                   |                   |
| 0   | late_vitals_0                                                                          | None of the above                                                                                                                                                                                                                                                           |                                                                                                                                                                                                                                                                                                                                                                                                                                                                                                                                                                                                                                                                                                                                                                                                         |   |                   |                          |    |                   |                                       |   |                   |             |   |                   |                        |   |                   |                                                    |   |                   |                                                         |   |                   |                                                      |   |                   |                   |
| 521 | <b>late_misc_sx</b><br><br><b>Show the field ONLY if:</b><br><b>[late_ss] = '1'</b>    | <b>Section Header:</b> <i>Late-Developed Miscellaneous Opioid Related Side Effects</i><br><br><b>Which of the following miscellaneous opioid related side effects were documented after the first 6 hours following first buprenorphine administration until discharge?</b> | <b>checkbox, Required</b><br><table border="1"> <tr> <td>1</td> <td>late_misc_sx_1</td> <td>Difficulty passing urine</td> </tr> <tr> <td>2</td> <td>late_misc_sx_2</td> <td>Itchiness</td> </tr> <tr> <td>3</td> <td>late_misc_sx_3</td> <td>Dry mouth</td> </tr> <tr> <td>4</td> <td>late_misc_sx_4</td> <td>Headache</td> </tr> <tr> <td>5</td> <td>late_misc_sx_5</td> <td>Unable to walk</td> </tr> <tr> <td>6</td> <td>late_misc_sx_6</td> <td>Unable to discharge</td> </tr> <tr> <td>7</td> <td>late_misc_sx_7</td> <td>Pupil size smaller than normal (constriction/miosis)</td> </tr> <tr> <td>0</td> <td>late_misc_sx_0</td> <td>None of the above</td> </tr> </table>                                                                                                                        | 1 | late_misc_sx_1    | Difficulty passing urine | 2  | late_misc_sx_2    | Itchiness                             | 3 | late_misc_sx_3    | Dry mouth   | 4 | late_misc_sx_4    | Headache               | 5 | late_misc_sx_5    | Unable to walk                                     | 6 | late_misc_sx_6    | Unable to discharge                                     | 7 | late_misc_sx_7    | Pupil size smaller than normal (constriction/miosis) | 0 | late_misc_sx_0    | None of the above |
| 1   | late_misc_sx_1                                                                         | Difficulty passing urine                                                                                                                                                                                                                                                    |                                                                                                                                                                                                                                                                                                                                                                                                                                                                                                                                                                                                                                                                                                                                                                                                         |   |                   |                          |    |                   |                                       |   |                   |             |   |                   |                        |   |                   |                                                    |   |                   |                                                         |   |                   |                                                      |   |                   |                   |
| 2   | late_misc_sx_2                                                                         | Itchiness                                                                                                                                                                                                                                                                   |                                                                                                                                                                                                                                                                                                                                                                                                                                                                                                                                                                                                                                                                                                                                                                                                         |   |                   |                          |    |                   |                                       |   |                   |             |   |                   |                        |   |                   |                                                    |   |                   |                                                         |   |                   |                                                      |   |                   |                   |
| 3   | late_misc_sx_3                                                                         | Dry mouth                                                                                                                                                                                                                                                                   |                                                                                                                                                                                                                                                                                                                                                                                                                                                                                                                                                                                                                                                                                                                                                                                                         |   |                   |                          |    |                   |                                       |   |                   |             |   |                   |                        |   |                   |                                                    |   |                   |                                                         |   |                   |                                                      |   |                   |                   |
| 4   | late_misc_sx_4                                                                         | Headache                                                                                                                                                                                                                                                                    |                                                                                                                                                                                                                                                                                                                                                                                                                                                                                                                                                                                                                                                                                                                                                                                                         |   |                   |                          |    |                   |                                       |   |                   |             |   |                   |                        |   |                   |                                                    |   |                   |                                                         |   |                   |                                                      |   |                   |                   |
| 5   | late_misc_sx_5                                                                         | Unable to walk                                                                                                                                                                                                                                                              |                                                                                                                                                                                                                                                                                                                                                                                                                                                                                                                                                                                                                                                                                                                                                                                                         |   |                   |                          |    |                   |                                       |   |                   |             |   |                   |                        |   |                   |                                                    |   |                   |                                                         |   |                   |                                                      |   |                   |                   |
| 6   | late_misc_sx_6                                                                         | Unable to discharge                                                                                                                                                                                                                                                         |                                                                                                                                                                                                                                                                                                                                                                                                                                                                                                                                                                                                                                                                                                                                                                                                         |   |                   |                          |    |                   |                                       |   |                   |             |   |                   |                        |   |                   |                                                    |   |                   |                                                         |   |                   |                                                      |   |                   |                   |
| 7   | late_misc_sx_7                                                                         | Pupil size smaller than normal (constriction/miosis)                                                                                                                                                                                                                        |                                                                                                                                                                                                                                                                                                                                                                                                                                                                                                                                                                                                                                                                                                                                                                                                         |   |                   |                          |    |                   |                                       |   |                   |             |   |                   |                        |   |                   |                                                    |   |                   |                                                         |   |                   |                                                      |   |                   |                   |
| 0   | late_misc_sx_0                                                                         | None of the above                                                                                                                                                                                                                                                           |                                                                                                                                                                                                                                                                                                                                                                                                                                                                                                                                                                                                                                                                                                                                                                                                         |   |                   |                          |    |                   |                                       |   |                   |             |   |                   |                        |   |                   |                                                    |   |                   |                                                         |   |                   |                                                      |   |                   |                   |
| 522 | <b>ed_death</b>                                                                        | <b>Section Header:</b> <i>Death</i><br><br><b>Did the ED chart indicate that the patient died?</b>                                                                                                                                                                          | <b>yesno, Required</b><br><table border="1"> <tr> <td>1</td> <td>Yes</td> </tr> <tr> <td>0</td> <td>No</td> </tr> </table>                                                                                                                                                                                                                                                                                                                                                                                                                                                                                                                                                                                                                                                                              | 1 | Yes               | 0                        | No |                   |                                       |   |                   |             |   |                   |                        |   |                   |                                                    |   |                   |                                                         |   |                   |                                                      |   |                   |                   |
| 1   | Yes                                                                                    |                                                                                                                                                                                                                                                                             |                                                                                                                                                                                                                                                                                                                                                                                                                                                                                                                                                                                                                                                                                                                                                                                                         |   |                   |                          |    |                   |                                       |   |                   |             |   |                   |                        |   |                   |                                                    |   |                   |                                                         |   |                   |                                                      |   |                   |                   |
| 0   | No                                                                                     |                                                                                                                                                                                                                                                                             |                                                                                                                                                                                                                                                                                                                                                                                                                                                                                                                                                                                                                                                                                                                                                                                                         |   |                   |                          |    |                   |                                       |   |                   |             |   |                   |                        |   |                   |                                                    |   |                   |                                                         |   |                   |                                                      |   |                   |                   |
| 523 | <b>other_meds</b>                                                                      | <b>Section Header:</b> <i>Other E.D. Medications</i><br><br><b>Was the patient given any medications before bup or within the first six hours after bup?</b>                                                                                                                | <b>yesno, Required</b><br><table border="1"> <tr> <td>1</td> <td>Yes</td> </tr> <tr> <td>0</td> <td>No</td> </tr> </table>                                                                                                                                                                                                                                                                                                                                                                                                                                                                                                                                                                                                                                                                              | 1 | Yes               | 0                        | No |                   |                                       |   |                   |             |   |                   |                        |   |                   |                                                    |   |                   |                                                         |   |                   |                                                      |   |                   |                   |
| 1   | Yes                                                                                    |                                                                                                                                                                                                                                                                             |                                                                                                                                                                                                                                                                                                                                                                                                                                                                                                                                                                                                                                                                                                                                                                                                         |   |                   |                          |    |                   |                                       |   |                   |             |   |                   |                        |   |                   |                                                    |   |                   |                                                         |   |                   |                                                      |   |                   |                   |
| 0   | No                                                                                     |                                                                                                                                                                                                                                                                             |                                                                                                                                                                                                                                                                                                                                                                                                                                                                                                                                                                                                                                                                                                                                                                                                         |   |                   |                          |    |                   |                                       |   |                   |             |   |                   |                        |   |                   |                                                    |   |                   |                                                         |   |                   |                                                      |   |                   |                   |

|     |                                                                                                                                                                                                                                                                                                                                                                                                                             |                                                      |                                                                                                                                                                                                                                                                                                                                                                                                   |   |   |   |   |   |   |   |   |   |   |   |   |   |   |   |   |   |   |    |    |
|-----|-----------------------------------------------------------------------------------------------------------------------------------------------------------------------------------------------------------------------------------------------------------------------------------------------------------------------------------------------------------------------------------------------------------------------------|------------------------------------------------------|---------------------------------------------------------------------------------------------------------------------------------------------------------------------------------------------------------------------------------------------------------------------------------------------------------------------------------------------------------------------------------------------------|---|---|---|---|---|---|---|---|---|---|---|---|---|---|---|---|---|---|----|----|
| 524 | <b>other_meds_num</b><br><b>Show the field ONLY if:</b><br><b>[other_meds] = '1'</b>                                                                                                                                                                                                                                                                                                                                        | <b>How many other unique medications were given?</b> | <b>radio, Required</b><br><table border="1" data-bbox="1047 115 1144 588"> <tr><td>1</td><td>1</td></tr> <tr><td>2</td><td>2</td></tr> <tr><td>3</td><td>3</td></tr> <tr><td>4</td><td>4</td></tr> <tr><td>5</td><td>5</td></tr> <tr><td>6</td><td>6</td></tr> <tr><td>7</td><td>7</td></tr> <tr><td>8</td><td>8</td></tr> <tr><td>9</td><td>9</td></tr> <tr><td>10</td><td>10</td></tr> </table> | 1 | 1 | 2 | 2 | 3 | 3 | 4 | 4 | 5 | 5 | 6 | 6 | 7 | 7 | 8 | 8 | 9 | 9 | 10 | 10 |
| 1   | 1                                                                                                                                                                                                                                                                                                                                                                                                                           |                                                      |                                                                                                                                                                                                                                                                                                                                                                                                   |   |   |   |   |   |   |   |   |   |   |   |   |   |   |   |   |   |   |    |    |
| 2   | 2                                                                                                                                                                                                                                                                                                                                                                                                                           |                                                      |                                                                                                                                                                                                                                                                                                                                                                                                   |   |   |   |   |   |   |   |   |   |   |   |   |   |   |   |   |   |   |    |    |
| 3   | 3                                                                                                                                                                                                                                                                                                                                                                                                                           |                                                      |                                                                                                                                                                                                                                                                                                                                                                                                   |   |   |   |   |   |   |   |   |   |   |   |   |   |   |   |   |   |   |    |    |
| 4   | 4                                                                                                                                                                                                                                                                                                                                                                                                                           |                                                      |                                                                                                                                                                                                                                                                                                                                                                                                   |   |   |   |   |   |   |   |   |   |   |   |   |   |   |   |   |   |   |    |    |
| 5   | 5                                                                                                                                                                                                                                                                                                                                                                                                                           |                                                      |                                                                                                                                                                                                                                                                                                                                                                                                   |   |   |   |   |   |   |   |   |   |   |   |   |   |   |   |   |   |   |    |    |
| 6   | 6                                                                                                                                                                                                                                                                                                                                                                                                                           |                                                      |                                                                                                                                                                                                                                                                                                                                                                                                   |   |   |   |   |   |   |   |   |   |   |   |   |   |   |   |   |   |   |    |    |
| 7   | 7                                                                                                                                                                                                                                                                                                                                                                                                                           |                                                      |                                                                                                                                                                                                                                                                                                                                                                                                   |   |   |   |   |   |   |   |   |   |   |   |   |   |   |   |   |   |   |    |    |
| 8   | 8                                                                                                                                                                                                                                                                                                                                                                                                                           |                                                      |                                                                                                                                                                                                                                                                                                                                                                                                   |   |   |   |   |   |   |   |   |   |   |   |   |   |   |   |   |   |   |    |    |
| 9   | 9                                                                                                                                                                                                                                                                                                                                                                                                                           |                                                      |                                                                                                                                                                                                                                                                                                                                                                                                   |   |   |   |   |   |   |   |   |   |   |   |   |   |   |   |   |   |   |    |    |
| 10  | 10                                                                                                                                                                                                                                                                                                                                                                                                                          |                                                      |                                                                                                                                                                                                                                                                                                                                                                                                   |   |   |   |   |   |   |   |   |   |   |   |   |   |   |   |   |   |   |    |    |
| 525 | <b>other_meds_1</b><br><b>Show the field ONLY if:</b><br><b>[other_meds_num] = '1'</b><br><b>or [other_meds_num] = '2'</b><br><b>or [other_meds_num] = '3'</b><br><b>or [other_meds_num] = '4'</b><br><b>or [other_meds_num] = '5'</b><br><b>or [other_meds_num] = '6'</b><br><b>or [other_meds_num] = '7'</b><br><b>or [other_meds_num] = '8'</b><br><b>or [other_meds_num] = '9'</b><br><b>or [other_meds_num] = '10'</b> | <b>Please name the (first) medication</b>            | <b>text, Required</b>                                                                                                                                                                                                                                                                                                                                                                             |   |   |   |   |   |   |   |   |   |   |   |   |   |   |   |   |   |   |    |    |
| 526 | <b>other_meds_2</b><br><b>Show the field ONLY if:</b><br><b>[other_meds_num] = '2'</b><br><b>or [other_meds_num] = '3'</b><br><b>or [other_meds_num] = '4'</b><br><b>or [other_meds_num] = '5'</b><br><b>or [other_meds_num] = '6'</b><br><b>or [other_meds_num] = '7'</b><br><b>or [other_meds_num] = '8'</b><br><b>or [other_meds_num] = '9'</b><br><b>or [other_meds_num] = '10'</b>                                     | <b>Please name the second medication</b>             | <b>text, Required</b>                                                                                                                                                                                                                                                                                                                                                                             |   |   |   |   |   |   |   |   |   |   |   |   |   |   |   |   |   |   |    |    |
| 527 | <b>other_meds_3</b><br><b>Show the field ONLY if:</b><br><b>[other_meds_num] = '3'</b><br><b>or [other_meds_num] = '4'</b><br><b>or [other_meds_num] = '5'</b><br><b>or [other_meds_num] = '6'</b><br><b>or [other_meds_num] = '7'</b><br><b>or [other_meds_num] = '8'</b><br><b>or [other_meds_num] = '9'</b><br><b>or [other_meds_num] = '10'</b>                                                                         | <b>Please name the third medication</b>              | <b>text, Required</b>                                                                                                                                                                                                                                                                                                                                                                             |   |   |   |   |   |   |   |   |   |   |   |   |   |   |   |   |   |   |    |    |

|     |                                                                                                                                                                                                                                                                |                                           |                       |
|-----|----------------------------------------------------------------------------------------------------------------------------------------------------------------------------------------------------------------------------------------------------------------|-------------------------------------------|-----------------------|
| 528 | <b>other_meds_4</b><br><br>Show the field ONLY if:<br>[other_meds_num] = '4'<br>or [other_meds_num] =<br>'5' or [other_meds_num]<br>= '6' or [other_meds_num]<br>= '7' or [other_meds_num]<br>= '8' or [other_meds_num]<br>= '9' or [other_meds_num]<br>= '10' | <b>Please name the fourth medication</b>  | <b>text, Required</b> |
| 529 | <b>other_meds_5</b><br><br>Show the field ONLY if:<br>[other_meds_num] = '5'<br>or [other_meds_num] =<br>'6' or [other_meds_num]<br>= '7' or [other_meds_num]<br>= '8' or [other_meds_num]<br>= '9' or [other_meds_num]<br>= '10'                              | <b>Please name the fifth medication</b>   | <b>text, Required</b> |
| 530 | <b>other_meds_6</b><br><br>Show the field ONLY if:<br>[other_meds_num] = '6'<br>or [other_meds_num] =<br>'7' or [other_meds_num]<br>= '8' or [other_meds_num]<br>= '9' or [other_meds_num]<br>= '10'                                                           | <b>Please name the sixth medication</b>   | <b>text, Required</b> |
| 531 | <b>other_meds_7</b><br><br>Show the field ONLY if:<br>[other_meds_num] = '7'<br>or [other_meds_num] =<br>'8' or [other_meds_num]<br>= '9' or [other_meds_num]<br>= '10'                                                                                        | <b>Please name the seventh medication</b> | <b>text, Required</b> |
| 532 | <b>other_meds_8</b><br><br>Show the field ONLY if:<br>[other_meds_num] = '8'<br>or [other_meds_num] =<br>'9' or [other_meds_num]<br>= '10'                                                                                                                     | <b>Please name the eighth medication</b>  | <b>text, Required</b> |
| 533 | <b>other_meds_9</b><br><br>Show the field ONLY if:<br>[other_meds_num] = '9'<br>or [other_meds_num] =<br>'10'                                                                                                                                                  | <b>Please name the ninth medication</b>   | <b>text, Required</b> |
| 534 | <b>other_meds_10</b><br><br>Show the field ONLY if:<br>[other_meds_num] = '10'                                                                                                                                                                                 | <b>Please name the tenth medication</b>   | <b>text, Required</b> |

|     |                                                                                        |                                                                                                                  |                                                                                                                                                                                                                                                                                                                                                                                                                                                                                                                                                                                                                                                                                                                                                                                                                                                                                                                                                                                                                                                                                                                                                         |   |                |                                |   |                |                                              |   |                |                               |   |                |                        |   |                |                                       |   |                |                                               |   |                |                                                               |   |                |                                                                |   |                |                   |    |        |                    |    |        |        |    |        |         |    |        |       |   |       |                   |
|-----|----------------------------------------------------------------------------------------|------------------------------------------------------------------------------------------------------------------|---------------------------------------------------------------------------------------------------------------------------------------------------------------------------------------------------------------------------------------------------------------------------------------------------------------------------------------------------------------------------------------------------------------------------------------------------------------------------------------------------------------------------------------------------------------------------------------------------------------------------------------------------------------------------------------------------------------------------------------------------------------------------------------------------------------------------------------------------------------------------------------------------------------------------------------------------------------------------------------------------------------------------------------------------------------------------------------------------------------------------------------------------------|---|----------------|--------------------------------|---|----------------|----------------------------------------------|---|----------------|-------------------------------|---|----------------|------------------------|---|----------------|---------------------------------------|---|----------------|-----------------------------------------------|---|----------------|---------------------------------------------------------------|---|----------------|----------------------------------------------------------------|---|----------------|-------------------|----|--------|--------------------|----|--------|--------|----|--------|---------|----|--------|-------|---|-------|-------------------|
| 535 | <b>ancillary_ed</b><br><br><b>Show the field ONLY if:</b><br><b>[other_meds] = '1'</b> | <b>Which of the following classes of medications was the patient given during their E.D. visit?</b>              | <b>checkbox, Required</b> <table border="1" data-bbox="1047 115 1523 672"> <tr> <td>1</td> <td>ancillary_ed_1</td> <td>Anti-emetics</td> </tr> <tr> <td>2</td> <td>ancillary_ed_2</td> <td>Anti-diarrheals</td> </tr> <tr> <td>3</td> <td>ancillary_ed_3</td> <td>Clonidine</td> </tr> <tr> <td>4</td> <td>ancillary_ed_4</td> <td>Non-opioid painkillers</td> </tr> <tr> <td>5</td> <td>ancillary_ed_5</td> <td>Opioids (not including buprenorphine)</td> </tr> <tr> <td>6</td> <td>ancillary_ed_6</td> <td>Gabapentin</td> </tr> <tr> <td>7</td> <td>ancillary_ed_7</td> <td>Psychiatric medications</td> </tr> <tr> <td>8</td> <td>ancillary_ed_8</td> <td>Benzodiazepines</td> </tr> <tr> <td>0</td> <td>ancillary_ed_0</td> <td>None of the above</td> </tr> </table>                                                                                                                                                                                                                                                                                                                                                                             | 1 | ancillary_ed_1 | Anti-emetics                   | 2 | ancillary_ed_2 | Anti-diarrheals                              | 3 | ancillary_ed_3 | Clonidine                     | 4 | ancillary_ed_4 | Non-opioid painkillers | 5 | ancillary_ed_5 | Opioids (not including buprenorphine) | 6 | ancillary_ed_6 | Gabapentin                                    | 7 | ancillary_ed_7 | Psychiatric medications                                       | 8 | ancillary_ed_8 | Benzodiazepines                                                | 0 | ancillary_ed_0 | None of the above |    |        |                    |    |        |        |    |        |         |    |        |       |   |       |                   |
| 1   | ancillary_ed_1                                                                         | Anti-emetics                                                                                                     |                                                                                                                                                                                                                                                                                                                                                                                                                                                                                                                                                                                                                                                                                                                                                                                                                                                                                                                                                                                                                                                                                                                                                         |   |                |                                |   |                |                                              |   |                |                               |   |                |                        |   |                |                                       |   |                |                                               |   |                |                                                               |   |                |                                                                |   |                |                   |    |        |                    |    |        |        |    |        |         |    |        |       |   |       |                   |
| 2   | ancillary_ed_2                                                                         | Anti-diarrheals                                                                                                  |                                                                                                                                                                                                                                                                                                                                                                                                                                                                                                                                                                                                                                                                                                                                                                                                                                                                                                                                                                                                                                                                                                                                                         |   |                |                                |   |                |                                              |   |                |                               |   |                |                        |   |                |                                       |   |                |                                               |   |                |                                                               |   |                |                                                                |   |                |                   |    |        |                    |    |        |        |    |        |         |    |        |       |   |       |                   |
| 3   | ancillary_ed_3                                                                         | Clonidine                                                                                                        |                                                                                                                                                                                                                                                                                                                                                                                                                                                                                                                                                                                                                                                                                                                                                                                                                                                                                                                                                                                                                                                                                                                                                         |   |                |                                |   |                |                                              |   |                |                               |   |                |                        |   |                |                                       |   |                |                                               |   |                |                                                               |   |                |                                                                |   |                |                   |    |        |                    |    |        |        |    |        |         |    |        |       |   |       |                   |
| 4   | ancillary_ed_4                                                                         | Non-opioid painkillers                                                                                           |                                                                                                                                                                                                                                                                                                                                                                                                                                                                                                                                                                                                                                                                                                                                                                                                                                                                                                                                                                                                                                                                                                                                                         |   |                |                                |   |                |                                              |   |                |                               |   |                |                        |   |                |                                       |   |                |                                               |   |                |                                                               |   |                |                                                                |   |                |                   |    |        |                    |    |        |        |    |        |         |    |        |       |   |       |                   |
| 5   | ancillary_ed_5                                                                         | Opioids (not including buprenorphine)                                                                            |                                                                                                                                                                                                                                                                                                                                                                                                                                                                                                                                                                                                                                                                                                                                                                                                                                                                                                                                                                                                                                                                                                                                                         |   |                |                                |   |                |                                              |   |                |                               |   |                |                        |   |                |                                       |   |                |                                               |   |                |                                                               |   |                |                                                                |   |                |                   |    |        |                    |    |        |        |    |        |         |    |        |       |   |       |                   |
| 6   | ancillary_ed_6                                                                         | Gabapentin                                                                                                       |                                                                                                                                                                                                                                                                                                                                                                                                                                                                                                                                                                                                                                                                                                                                                                                                                                                                                                                                                                                                                                                                                                                                                         |   |                |                                |   |                |                                              |   |                |                               |   |                |                        |   |                |                                       |   |                |                                               |   |                |                                                               |   |                |                                                                |   |                |                   |    |        |                    |    |        |        |    |        |         |    |        |       |   |       |                   |
| 7   | ancillary_ed_7                                                                         | Psychiatric medications                                                                                          |                                                                                                                                                                                                                                                                                                                                                                                                                                                                                                                                                                                                                                                                                                                                                                                                                                                                                                                                                                                                                                                                                                                                                         |   |                |                                |   |                |                                              |   |                |                               |   |                |                        |   |                |                                       |   |                |                                               |   |                |                                                               |   |                |                                                                |   |                |                   |    |        |                    |    |        |        |    |        |         |    |        |       |   |       |                   |
| 8   | ancillary_ed_8                                                                         | Benzodiazepines                                                                                                  |                                                                                                                                                                                                                                                                                                                                                                                                                                                                                                                                                                                                                                                                                                                                                                                                                                                                                                                                                                                                                                                                                                                                                         |   |                |                                |   |                |                                              |   |                |                               |   |                |                        |   |                |                                       |   |                |                                               |   |                |                                                               |   |                |                                                                |   |                |                   |    |        |                    |    |        |        |    |        |         |    |        |       |   |       |                   |
| 0   | ancillary_ed_0                                                                         | None of the above                                                                                                |                                                                                                                                                                                                                                                                                                                                                                                                                                                                                                                                                                                                                                                                                                                                                                                                                                                                                                                                                                                                                                                                                                                                                         |   |                |                                |   |                |                                              |   |                |                               |   |                |                        |   |                |                                       |   |                |                                               |   |                |                                                               |   |                |                                                                |   |                |                   |    |        |                    |    |        |        |    |        |         |    |        |       |   |       |                   |
| 536 | <b>md_hpi</b>                                                                          | <b>Section Header:</b> <i>MD Notes</i><br><b>MD/MLP HPI from Wellsoft</b><br><i>Copy and paste from MD note.</i> | <b>notes, Required</b>                                                                                                                                                                                                                                                                                                                                                                                                                                                                                                                                                                                                                                                                                                                                                                                                                                                                                                                                                                                                                                                                                                                                  |   |                |                                |   |                |                                              |   |                |                               |   |                |                        |   |                |                                       |   |                |                                               |   |                |                                                               |   |                |                                                                |   |                |                   |    |        |                    |    |        |        |    |        |         |    |        |       |   |       |                   |
| 537 | <b>pmh</b>                                                                             | <b>Past medical history (check all that apply)</b>                                                               | <b>checkbox, Required</b> <table border="1" data-bbox="1047 835 1523 1793"> <tr> <td>1</td> <td>pmh_1</td> <td>Congestive heart failure (CHF)</td> </tr> <tr> <td>2</td> <td>pmh_2</td> <td>Chronic obstructive pulmonary disease (COPD)</td> </tr> <tr> <td>3</td> <td>pmh_3</td> <td>Coronary artery disease (CAD)</td> </tr> <tr> <td>4</td> <td>pmh_4</td> <td>Diabetes mellitus (DM)</td> </tr> <tr> <td>5</td> <td>pmh_5</td> <td>Asthma</td> </tr> <tr> <td>6</td> <td>pmh_6</td> <td>HIV (check if rapid test comes back positive)</td> </tr> <tr> <td>7</td> <td>pmh_7</td> <td>Hepatitis C (if known; do not check if only Ab test positive)</td> </tr> <tr> <td>8</td> <td>pmh_8</td> <td>Chronic kidney disease (CKD) or end-stage renal disease (ESRD)</td> </tr> <tr> <td>9</td> <td>pmh_9</td> <td>Cirrhosis</td> </tr> <tr> <td>10</td> <td>pmh_10</td> <td>Hypertension (HTN)</td> </tr> <tr> <td>11</td> <td>pmh_11</td> <td>Cancer</td> </tr> <tr> <td>12</td> <td>pmh_12</td> <td>Seizure</td> </tr> <tr> <td>13</td> <td>pmh_13</td> <td>Other</td> </tr> <tr> <td>0</td> <td>pmh_0</td> <td>None of the above</td> </tr> </table> | 1 | pmh_1          | Congestive heart failure (CHF) | 2 | pmh_2          | Chronic obstructive pulmonary disease (COPD) | 3 | pmh_3          | Coronary artery disease (CAD) | 4 | pmh_4          | Diabetes mellitus (DM) | 5 | pmh_5          | Asthma                                | 6 | pmh_6          | HIV (check if rapid test comes back positive) | 7 | pmh_7          | Hepatitis C (if known; do not check if only Ab test positive) | 8 | pmh_8          | Chronic kidney disease (CKD) or end-stage renal disease (ESRD) | 9 | pmh_9          | Cirrhosis         | 10 | pmh_10 | Hypertension (HTN) | 11 | pmh_11 | Cancer | 12 | pmh_12 | Seizure | 13 | pmh_13 | Other | 0 | pmh_0 | None of the above |
| 1   | pmh_1                                                                                  | Congestive heart failure (CHF)                                                                                   |                                                                                                                                                                                                                                                                                                                                                                                                                                                                                                                                                                                                                                                                                                                                                                                                                                                                                                                                                                                                                                                                                                                                                         |   |                |                                |   |                |                                              |   |                |                               |   |                |                        |   |                |                                       |   |                |                                               |   |                |                                                               |   |                |                                                                |   |                |                   |    |        |                    |    |        |        |    |        |         |    |        |       |   |       |                   |
| 2   | pmh_2                                                                                  | Chronic obstructive pulmonary disease (COPD)                                                                     |                                                                                                                                                                                                                                                                                                                                                                                                                                                                                                                                                                                                                                                                                                                                                                                                                                                                                                                                                                                                                                                                                                                                                         |   |                |                                |   |                |                                              |   |                |                               |   |                |                        |   |                |                                       |   |                |                                               |   |                |                                                               |   |                |                                                                |   |                |                   |    |        |                    |    |        |        |    |        |         |    |        |       |   |       |                   |
| 3   | pmh_3                                                                                  | Coronary artery disease (CAD)                                                                                    |                                                                                                                                                                                                                                                                                                                                                                                                                                                                                                                                                                                                                                                                                                                                                                                                                                                                                                                                                                                                                                                                                                                                                         |   |                |                                |   |                |                                              |   |                |                               |   |                |                        |   |                |                                       |   |                |                                               |   |                |                                                               |   |                |                                                                |   |                |                   |    |        |                    |    |        |        |    |        |         |    |        |       |   |       |                   |
| 4   | pmh_4                                                                                  | Diabetes mellitus (DM)                                                                                           |                                                                                                                                                                                                                                                                                                                                                                                                                                                                                                                                                                                                                                                                                                                                                                                                                                                                                                                                                                                                                                                                                                                                                         |   |                |                                |   |                |                                              |   |                |                               |   |                |                        |   |                |                                       |   |                |                                               |   |                |                                                               |   |                |                                                                |   |                |                   |    |        |                    |    |        |        |    |        |         |    |        |       |   |       |                   |
| 5   | pmh_5                                                                                  | Asthma                                                                                                           |                                                                                                                                                                                                                                                                                                                                                                                                                                                                                                                                                                                                                                                                                                                                                                                                                                                                                                                                                                                                                                                                                                                                                         |   |                |                                |   |                |                                              |   |                |                               |   |                |                        |   |                |                                       |   |                |                                               |   |                |                                                               |   |                |                                                                |   |                |                   |    |        |                    |    |        |        |    |        |         |    |        |       |   |       |                   |
| 6   | pmh_6                                                                                  | HIV (check if rapid test comes back positive)                                                                    |                                                                                                                                                                                                                                                                                                                                                                                                                                                                                                                                                                                                                                                                                                                                                                                                                                                                                                                                                                                                                                                                                                                                                         |   |                |                                |   |                |                                              |   |                |                               |   |                |                        |   |                |                                       |   |                |                                               |   |                |                                                               |   |                |                                                                |   |                |                   |    |        |                    |    |        |        |    |        |         |    |        |       |   |       |                   |
| 7   | pmh_7                                                                                  | Hepatitis C (if known; do not check if only Ab test positive)                                                    |                                                                                                                                                                                                                                                                                                                                                                                                                                                                                                                                                                                                                                                                                                                                                                                                                                                                                                                                                                                                                                                                                                                                                         |   |                |                                |   |                |                                              |   |                |                               |   |                |                        |   |                |                                       |   |                |                                               |   |                |                                                               |   |                |                                                                |   |                |                   |    |        |                    |    |        |        |    |        |         |    |        |       |   |       |                   |
| 8   | pmh_8                                                                                  | Chronic kidney disease (CKD) or end-stage renal disease (ESRD)                                                   |                                                                                                                                                                                                                                                                                                                                                                                                                                                                                                                                                                                                                                                                                                                                                                                                                                                                                                                                                                                                                                                                                                                                                         |   |                |                                |   |                |                                              |   |                |                               |   |                |                        |   |                |                                       |   |                |                                               |   |                |                                                               |   |                |                                                                |   |                |                   |    |        |                    |    |        |        |    |        |         |    |        |       |   |       |                   |
| 9   | pmh_9                                                                                  | Cirrhosis                                                                                                        |                                                                                                                                                                                                                                                                                                                                                                                                                                                                                                                                                                                                                                                                                                                                                                                                                                                                                                                                                                                                                                                                                                                                                         |   |                |                                |   |                |                                              |   |                |                               |   |                |                        |   |                |                                       |   |                |                                               |   |                |                                                               |   |                |                                                                |   |                |                   |    |        |                    |    |        |        |    |        |         |    |        |       |   |       |                   |
| 10  | pmh_10                                                                                 | Hypertension (HTN)                                                                                               |                                                                                                                                                                                                                                                                                                                                                                                                                                                                                                                                                                                                                                                                                                                                                                                                                                                                                                                                                                                                                                                                                                                                                         |   |                |                                |   |                |                                              |   |                |                               |   |                |                        |   |                |                                       |   |                |                                               |   |                |                                                               |   |                |                                                                |   |                |                   |    |        |                    |    |        |        |    |        |         |    |        |       |   |       |                   |
| 11  | pmh_11                                                                                 | Cancer                                                                                                           |                                                                                                                                                                                                                                                                                                                                                                                                                                                                                                                                                                                                                                                                                                                                                                                                                                                                                                                                                                                                                                                                                                                                                         |   |                |                                |   |                |                                              |   |                |                               |   |                |                        |   |                |                                       |   |                |                                               |   |                |                                                               |   |                |                                                                |   |                |                   |    |        |                    |    |        |        |    |        |         |    |        |       |   |       |                   |
| 12  | pmh_12                                                                                 | Seizure                                                                                                          |                                                                                                                                                                                                                                                                                                                                                                                                                                                                                                                                                                                                                                                                                                                                                                                                                                                                                                                                                                                                                                                                                                                                                         |   |                |                                |   |                |                                              |   |                |                               |   |                |                        |   |                |                                       |   |                |                                               |   |                |                                                               |   |                |                                                                |   |                |                   |    |        |                    |    |        |        |    |        |         |    |        |       |   |       |                   |
| 13  | pmh_13                                                                                 | Other                                                                                                            |                                                                                                                                                                                                                                                                                                                                                                                                                                                                                                                                                                                                                                                                                                                                                                                                                                                                                                                                                                                                                                                                                                                                                         |   |                |                                |   |                |                                              |   |                |                               |   |                |                        |   |                |                                       |   |                |                                               |   |                |                                                               |   |                |                                                                |   |                |                   |    |        |                    |    |        |        |    |        |         |    |        |       |   |       |                   |
| 0   | pmh_0                                                                                  | None of the above                                                                                                |                                                                                                                                                                                                                                                                                                                                                                                                                                                                                                                                                                                                                                                                                                                                                                                                                                                                                                                                                                                                                                                                                                                                                         |   |                |                                |   |                |                                              |   |                |                               |   |                |                        |   |                |                                       |   |                |                                               |   |                |                                                               |   |                |                                                                |   |                |                   |    |        |                    |    |        |        |    |        |         |    |        |       |   |       |                   |
| 538 | <b>pmh_oth</b><br><br><b>Show the field ONLY if:</b><br><b>[pmh(13)] = '1'</b>         | <b>If "Other," please specify.</b>                                                                               | <b>text, Required</b>                                                                                                                                                                                                                                                                                                                                                                                                                                                                                                                                                                                                                                                                                                                                                                                                                                                                                                                                                                                                                                                                                                                                   |   |                |                                |   |                |                                              |   |                |                               |   |                |                        |   |                |                                       |   |                |                                               |   |                |                                                               |   |                |                                                                |   |                |                   |    |        |                    |    |        |        |    |        |         |    |        |       |   |       |                   |



|     |                                                                                        |                                                                                                                             |                                                                                                                                                                                                                                                                                                                                                                                                                                                                                                                                                                                                                                                                                                                                                                                                                                         |   |            |                  |    |            |            |   |            |                  |   |            |                                        |   |            |         |   |            |                                       |   |          |         |   |          |         |   |          |                         |    |           |                              |   |          |                   |
|-----|----------------------------------------------------------------------------------------|-----------------------------------------------------------------------------------------------------------------------------|-----------------------------------------------------------------------------------------------------------------------------------------------------------------------------------------------------------------------------------------------------------------------------------------------------------------------------------------------------------------------------------------------------------------------------------------------------------------------------------------------------------------------------------------------------------------------------------------------------------------------------------------------------------------------------------------------------------------------------------------------------------------------------------------------------------------------------------------|---|------------|------------------|----|------------|------------|---|------------|------------------|---|------------|----------------------------------------|---|------------|---------|---|------------|---------------------------------------|---|----------|---------|---|----------|---------|---|----------|-------------------------|----|-----------|------------------------------|---|----------|-------------------|
| 539 | <b>sud_hx</b><br><br>                                                                  | <b>Other past and present substance use (check all that apply).</b><br><br>                                                 | <b>checkbox, Required</b><br><table border="1" data-bbox="1045 115 1523 766"> <tr> <td>1</td> <td>sud_hx_1</td> <td>Methamphetamines</td> </tr> <tr> <td>2</td> <td>sud_hx_2</td> <td>Cocaine</td> </tr> <tr> <td>3</td> <td>sud_hx_3</td> <td>Cannabis</td> </tr> <tr> <td>4</td> <td>sud_hx_4</td> <td>Hallucinogens (including Ecstasy/MDMA)</td> </tr> <tr> <td>5</td> <td>sud_hx_5</td> <td>LSD</td> </tr> <tr> <td>6</td> <td>sud_hx_6</td> <td>Benzodiazepines</td> </tr> <tr> <td>7</td> <td>sud_hx_7</td> <td>Alcohol</td> </tr> <tr> <td>8</td> <td>sud_hx_8</td> <td>Tobacco</td> </tr> <tr> <td>9</td> <td>sud_hx_9</td> <td>Other stimulant use NOS</td> </tr> <tr> <td>10</td> <td>sud_hx_10</td> <td>Other (note any heavy usage)</td> </tr> <tr> <td>0</td> <td>sud_hx_0</td> <td>None of the above</td> </tr> </table> | 1 | sud_hx_1   | Methamphetamines | 2  | sud_hx_2   | Cocaine    | 3 | sud_hx_3   | Cannabis         | 4 | sud_hx_4   | Hallucinogens (including Ecstasy/MDMA) | 5 | sud_hx_5   | LSD     | 6 | sud_hx_6   | Benzodiazepines                       | 7 | sud_hx_7 | Alcohol | 8 | sud_hx_8 | Tobacco | 9 | sud_hx_9 | Other stimulant use NOS | 10 | sud_hx_10 | Other (note any heavy usage) | 0 | sud_hx_0 | None of the above |
| 1   | sud_hx_1                                                                               | Methamphetamines                                                                                                            |                                                                                                                                                                                                                                                                                                                                                                                                                                                                                                                                                                                                                                                                                                                                                                                                                                         |   |            |                  |    |            |            |   |            |                  |   |            |                                        |   |            |         |   |            |                                       |   |          |         |   |          |         |   |          |                         |    |           |                              |   |          |                   |
| 2   | sud_hx_2                                                                               | Cocaine                                                                                                                     |                                                                                                                                                                                                                                                                                                                                                                                                                                                                                                                                                                                                                                                                                                                                                                                                                                         |   |            |                  |    |            |            |   |            |                  |   |            |                                        |   |            |         |   |            |                                       |   |          |         |   |          |         |   |          |                         |    |           |                              |   |          |                   |
| 3   | sud_hx_3                                                                               | Cannabis                                                                                                                    |                                                                                                                                                                                                                                                                                                                                                                                                                                                                                                                                                                                                                                                                                                                                                                                                                                         |   |            |                  |    |            |            |   |            |                  |   |            |                                        |   |            |         |   |            |                                       |   |          |         |   |          |         |   |          |                         |    |           |                              |   |          |                   |
| 4   | sud_hx_4                                                                               | Hallucinogens (including Ecstasy/MDMA)                                                                                      |                                                                                                                                                                                                                                                                                                                                                                                                                                                                                                                                                                                                                                                                                                                                                                                                                                         |   |            |                  |    |            |            |   |            |                  |   |            |                                        |   |            |         |   |            |                                       |   |          |         |   |          |         |   |          |                         |    |           |                              |   |          |                   |
| 5   | sud_hx_5                                                                               | LSD                                                                                                                         |                                                                                                                                                                                                                                                                                                                                                                                                                                                                                                                                                                                                                                                                                                                                                                                                                                         |   |            |                  |    |            |            |   |            |                  |   |            |                                        |   |            |         |   |            |                                       |   |          |         |   |          |         |   |          |                         |    |           |                              |   |          |                   |
| 6   | sud_hx_6                                                                               | Benzodiazepines                                                                                                             |                                                                                                                                                                                                                                                                                                                                                                                                                                                                                                                                                                                                                                                                                                                                                                                                                                         |   |            |                  |    |            |            |   |            |                  |   |            |                                        |   |            |         |   |            |                                       |   |          |         |   |          |         |   |          |                         |    |           |                              |   |          |                   |
| 7   | sud_hx_7                                                                               | Alcohol                                                                                                                     |                                                                                                                                                                                                                                                                                                                                                                                                                                                                                                                                                                                                                                                                                                                                                                                                                                         |   |            |                  |    |            |            |   |            |                  |   |            |                                        |   |            |         |   |            |                                       |   |          |         |   |          |         |   |          |                         |    |           |                              |   |          |                   |
| 8   | sud_hx_8                                                                               | Tobacco                                                                                                                     |                                                                                                                                                                                                                                                                                                                                                                                                                                                                                                                                                                                                                                                                                                                                                                                                                                         |   |            |                  |    |            |            |   |            |                  |   |            |                                        |   |            |         |   |            |                                       |   |          |         |   |          |         |   |          |                         |    |           |                              |   |          |                   |
| 9   | sud_hx_9                                                                               | Other stimulant use NOS                                                                                                     |                                                                                                                                                                                                                                                                                                                                                                                                                                                                                                                                                                                                                                                                                                                                                                                                                                         |   |            |                  |    |            |            |   |            |                  |   |            |                                        |   |            |         |   |            |                                       |   |          |         |   |          |         |   |          |                         |    |           |                              |   |          |                   |
| 10  | sud_hx_10                                                                              | Other (note any heavy usage)                                                                                                |                                                                                                                                                                                                                                                                                                                                                                                                                                                                                                                                                                                                                                                                                                                                                                                                                                         |   |            |                  |    |            |            |   |            |                  |   |            |                                        |   |            |         |   |            |                                       |   |          |         |   |          |         |   |          |                         |    |           |                              |   |          |                   |
| 0   | sud_hx_0                                                                               | None of the above                                                                                                           |                                                                                                                                                                                                                                                                                                                                                                                                                                                                                                                                                                                                                                                                                                                                                                                                                                         |   |            |                  |    |            |            |   |            |                  |   |            |                                        |   |            |         |   |            |                                       |   |          |         |   |          |         |   |          |                         |    |           |                              |   |          |                   |
| 540 | <b>sud_hx_oth</b><br><br><b>Show the field ONLY if:</b><br><b>[sud_hx(10)] = '1'</b>   | <b>If "Other," please specify.</b><br><br>                                                                                  | <b>text, Required</b><br><br>                                                                                                                                                                                                                                                                                                                                                                                                                                                                                                                                                                                                                                                                                                                                                                                                           |   |            |                  |    |            |            |   |            |                  |   |            |                                        |   |            |         |   |            |                                       |   |          |         |   |          |         |   |          |                         |    |           |                              |   |          |                   |
| 541 | <b>psych_admit</b><br><br>                                                             | <b>Does the patient have a history of admission to an inpatient psychiatric unit?</b><br><i>E.g., John George Pavillion</i> | <b>yesno, Required</b><br><table border="1" data-bbox="1045 953 1138 1045"> <tr> <td>1</td> <td>Yes</td> </tr> <tr> <td>0</td> <td>No</td> </tr> </table>                                                                                                                                                                                                                                                                                                                                                                                                                                                                                                                                                                                                                                                                               | 1 | Yes        | 0                | No |            |            |   |            |                  |   |            |                                        |   |            |         |   |            |                                       |   |          |         |   |          |         |   |          |                         |    |           |                              |   |          |                   |
| 1   | Yes                                                                                    |                                                                                                                             |                                                                                                                                                                                                                                                                                                                                                                                                                                                                                                                                                                                                                                                                                                                                                                                                                                         |   |            |                  |    |            |            |   |            |                  |   |            |                                        |   |            |         |   |            |                                       |   |          |         |   |          |         |   |          |                         |    |           |                              |   |          |                   |
| 0   | No                                                                                     |                                                                                                                             |                                                                                                                                                                                                                                                                                                                                                                                                                                                                                                                                                                                                                                                                                                                                                                                                                                         |   |            |                  |    |            |            |   |            |                  |   |            |                                        |   |            |         |   |            |                                       |   |          |         |   |          |         |   |          |                         |    |           |                              |   |          |                   |
| 542 | <b>psych_disorder</b><br><br>                                                          | <b>Any mention of a psychiatric disorder?</b>                                                                               | <b>yesno, Required</b><br><table border="1" data-bbox="1045 1100 1138 1192"> <tr> <td>1</td> <td>Yes</td> </tr> <tr> <td>0</td> <td>No</td> </tr> </table>                                                                                                                                                                                                                                                                                                                                                                                                                                                                                                                                                                                                                                                                              | 1 | Yes        | 0                | No |            |            |   |            |                  |   |            |                                        |   |            |         |   |            |                                       |   |          |         |   |          |         |   |          |                         |    |           |                              |   |          |                   |
| 1   | Yes                                                                                    |                                                                                                                             |                                                                                                                                                                                                                                                                                                                                                                                                                                                                                                                                                                                                                                                                                                                                                                                                                                         |   |            |                  |    |            |            |   |            |                  |   |            |                                        |   |            |         |   |            |                                       |   |          |         |   |          |         |   |          |                         |    |           |                              |   |          |                   |
| 0   | No                                                                                     |                                                                                                                             |                                                                                                                                                                                                                                                                                                                                                                                                                                                                                                                                                                                                                                                                                                                                                                                                                                         |   |            |                  |    |            |            |   |            |                  |   |            |                                        |   |            |         |   |            |                                       |   |          |         |   |          |         |   |          |                         |    |           |                              |   |          |                   |
| 543 | <b>psych_hx</b><br><br><b>Show the field ONLY if:</b><br><b>[psych_disorder] = '1'</b> | <b>Please choose from the following psychiatric disorders.</b><br><i>If "Other," or not specified, choose: "Psych NOS."</i> | <b>checkbox, Required</b><br><table border="1" data-bbox="1045 1247 1523 1558"> <tr> <td>1</td> <td>psych_hx_1</td> <td>Psych NOS</td> </tr> <tr> <td>2</td> <td>psych_hx_2</td> <td>Depression</td> </tr> <tr> <td>3</td> <td>psych_hx_3</td> <td>Bipolar disorder</td> </tr> <tr> <td>4</td> <td>psych_hx_4</td> <td>Schizophrenia</td> </tr> <tr> <td>5</td> <td>psych_hx_5</td> <td>Anxiety</td> </tr> <tr> <td>6</td> <td>psych_hx_6</td> <td>Post-traumatic stress disorder (PTSD)</td> </tr> </table>                                                                                                                                                                                                                                                                                                                            | 1 | psych_hx_1 | Psych NOS        | 2  | psych_hx_2 | Depression | 3 | psych_hx_3 | Bipolar disorder | 4 | psych_hx_4 | Schizophrenia                          | 5 | psych_hx_5 | Anxiety | 6 | psych_hx_6 | Post-traumatic stress disorder (PTSD) |   |          |         |   |          |         |   |          |                         |    |           |                              |   |          |                   |
| 1   | psych_hx_1                                                                             | Psych NOS                                                                                                                   |                                                                                                                                                                                                                                                                                                                                                                                                                                                                                                                                                                                                                                                                                                                                                                                                                                         |   |            |                  |    |            |            |   |            |                  |   |            |                                        |   |            |         |   |            |                                       |   |          |         |   |          |         |   |          |                         |    |           |                              |   |          |                   |
| 2   | psych_hx_2                                                                             | Depression                                                                                                                  |                                                                                                                                                                                                                                                                                                                                                                                                                                                                                                                                                                                                                                                                                                                                                                                                                                         |   |            |                  |    |            |            |   |            |                  |   |            |                                        |   |            |         |   |            |                                       |   |          |         |   |          |         |   |          |                         |    |           |                              |   |          |                   |
| 3   | psych_hx_3                                                                             | Bipolar disorder                                                                                                            |                                                                                                                                                                                                                                                                                                                                                                                                                                                                                                                                                                                                                                                                                                                                                                                                                                         |   |            |                  |    |            |            |   |            |                  |   |            |                                        |   |            |         |   |            |                                       |   |          |         |   |          |         |   |          |                         |    |           |                              |   |          |                   |
| 4   | psych_hx_4                                                                             | Schizophrenia                                                                                                               |                                                                                                                                                                                                                                                                                                                                                                                                                                                                                                                                                                                                                                                                                                                                                                                                                                         |   |            |                  |    |            |            |   |            |                  |   |            |                                        |   |            |         |   |            |                                       |   |          |         |   |          |         |   |          |                         |    |           |                              |   |          |                   |
| 5   | psych_hx_5                                                                             | Anxiety                                                                                                                     |                                                                                                                                                                                                                                                                                                                                                                                                                                                                                                                                                                                                                                                                                                                                                                                                                                         |   |            |                  |    |            |            |   |            |                  |   |            |                                        |   |            |         |   |            |                                       |   |          |         |   |          |         |   |          |                         |    |           |                              |   |          |                   |
| 6   | psych_hx_6                                                                             | Post-traumatic stress disorder (PTSD)                                                                                       |                                                                                                                                                                                                                                                                                                                                                                                                                                                                                                                                                                                                                                                                                                                                                                                                                                         |   |            |                  |    |            |            |   |            |                  |   |            |                                        |   |            |         |   |            |                                       |   |          |         |   |          |         |   |          |                         |    |           |                              |   |          |                   |

|     |                                                                                                   |                                                                                                                                    |                                                                                                                                                                                                                                                                                                                                                                                                                                                                                                                                                                                                                                                                                                                               |   |                    |              |                   |                    |                                                   |   |                    |                                    |   |                    |                              |   |                    |                          |   |                    |                         |   |                    |                 |     |                      |                   |
|-----|---------------------------------------------------------------------------------------------------|------------------------------------------------------------------------------------------------------------------------------------|-------------------------------------------------------------------------------------------------------------------------------------------------------------------------------------------------------------------------------------------------------------------------------------------------------------------------------------------------------------------------------------------------------------------------------------------------------------------------------------------------------------------------------------------------------------------------------------------------------------------------------------------------------------------------------------------------------------------------------|---|--------------------|--------------|-------------------|--------------------|---------------------------------------------------|---|--------------------|------------------------------------|---|--------------------|------------------------------|---|--------------------|--------------------------|---|--------------------|-------------------------|---|--------------------|-----------------|-----|----------------------|-------------------|
| 544 | <b>ancillary_home</b><br><br>                                                                     | <b>Which of the following classes of prescribed supportive medications does the patient currently take?</b><br><br>                | <b>checkbox, Required</b><br><table border="1"> <tr> <td>1</td> <td>ancillary_home_1</td> <td>Anti-emetics</td> </tr> <tr> <td>2</td> <td>ancillary_home_2</td> <td>Anti-diarrheals</td> </tr> <tr> <td>3</td> <td>ancillary_home_3</td> <td>Clonidine</td> </tr> <tr> <td>4</td> <td>ancillary_home_4</td> <td>Non-opioid painkillers</td> </tr> <tr> <td>6</td> <td>ancillary_home_6</td> <td>Gabapentin</td> </tr> <tr> <td>7</td> <td>ancillary_home_7</td> <td>Psychiatric medications</td> </tr> <tr> <td>8</td> <td>ancillary_home_8</td> <td>Benzodiazepines</td> </tr> <tr> <td>0</td> <td>ancillary_home_0</td> <td>None of the above</td> </tr> </table>                                                           | 1 | ancillary_home_1   | Anti-emetics | 2                 | ancillary_home_2   | Anti-diarrheals                                   | 3 | ancillary_home_3   | Clonidine                          | 4 | ancillary_home_4   | Non-opioid painkillers       | 6 | ancillary_home_6   | Gabapentin               | 7 | ancillary_home_7   | Psychiatric medications | 8 | ancillary_home_8   | Benzodiazepines | 0   | ancillary_home_0     | None of the above |
| 1   | ancillary_home_1                                                                                  | Anti-emetics                                                                                                                       |                                                                                                                                                                                                                                                                                                                                                                                                                                                                                                                                                                                                                                                                                                                               |   |                    |              |                   |                    |                                                   |   |                    |                                    |   |                    |                              |   |                    |                          |   |                    |                         |   |                    |                 |     |                      |                   |
| 2   | ancillary_home_2                                                                                  | Anti-diarrheals                                                                                                                    |                                                                                                                                                                                                                                                                                                                                                                                                                                                                                                                                                                                                                                                                                                                               |   |                    |              |                   |                    |                                                   |   |                    |                                    |   |                    |                              |   |                    |                          |   |                    |                         |   |                    |                 |     |                      |                   |
| 3   | ancillary_home_3                                                                                  | Clonidine                                                                                                                          |                                                                                                                                                                                                                                                                                                                                                                                                                                                                                                                                                                                                                                                                                                                               |   |                    |              |                   |                    |                                                   |   |                    |                                    |   |                    |                              |   |                    |                          |   |                    |                         |   |                    |                 |     |                      |                   |
| 4   | ancillary_home_4                                                                                  | Non-opioid painkillers                                                                                                             |                                                                                                                                                                                                                                                                                                                                                                                                                                                                                                                                                                                                                                                                                                                               |   |                    |              |                   |                    |                                                   |   |                    |                                    |   |                    |                              |   |                    |                          |   |                    |                         |   |                    |                 |     |                      |                   |
| 6   | ancillary_home_6                                                                                  | Gabapentin                                                                                                                         |                                                                                                                                                                                                                                                                                                                                                                                                                                                                                                                                                                                                                                                                                                                               |   |                    |              |                   |                    |                                                   |   |                    |                                    |   |                    |                              |   |                    |                          |   |                    |                         |   |                    |                 |     |                      |                   |
| 7   | ancillary_home_7                                                                                  | Psychiatric medications                                                                                                            |                                                                                                                                                                                                                                                                                                                                                                                                                                                                                                                                                                                                                                                                                                                               |   |                    |              |                   |                    |                                                   |   |                    |                                    |   |                    |                              |   |                    |                          |   |                    |                         |   |                    |                 |     |                      |                   |
| 8   | ancillary_home_8                                                                                  | Benzodiazepines                                                                                                                    |                                                                                                                                                                                                                                                                                                                                                                                                                                                                                                                                                                                                                                                                                                                               |   |                    |              |                   |                    |                                                   |   |                    |                                    |   |                    |                              |   |                    |                          |   |                    |                         |   |                    |                 |     |                      |                   |
| 0   | ancillary_home_0                                                                                  | None of the above                                                                                                                  |                                                                                                                                                                                                                                                                                                                                                                                                                                                                                                                                                                                                                                                                                                                               |   |                    |              |                   |                    |                                                   |   |                    |                                    |   |                    |                              |   |                    |                          |   |                    |                         |   |                    |                 |     |                      |                   |
| 545 | <b>last_illicit</b><br><br>                                                                       | <b>Last illicit opioid use known?</b><br><br>                                                                                      | <b>radio, Required</b><br><table border="1"> <tr> <td>1</td> <td>Yes</td> </tr> <tr> <td>0</td> <td>No/Not applicable</td> </tr> </table>                                                                                                                                                                                                                                                                                                                                                                                                                                                                                                                                                                                     | 1 | Yes                | 0            | No/Not applicable |                    |                                                   |   |                    |                                    |   |                    |                              |   |                    |                          |   |                    |                         |   |                    |                 |     |                      |                   |
| 1   | Yes                                                                                               |                                                                                                                                    |                                                                                                                                                                                                                                                                                                                                                                                                                                                                                                                                                                                                                                                                                                                               |   |                    |              |                   |                    |                                                   |   |                    |                                    |   |                    |                              |   |                    |                          |   |                    |                         |   |                    |                 |     |                      |                   |
| 0   | No/Not applicable                                                                                 |                                                                                                                                    |                                                                                                                                                                                                                                                                                                                                                                                                                                                                                                                                                                                                                                                                                                                               |   |                    |              |                   |                    |                                                   |   |                    |                                    |   |                    |                              |   |                    |                          |   |                    |                         |   |                    |                 |     |                      |                   |
| 546 | <b>last_opioid_type</b><br><br><b>Show the field ONLY if:</b><br><b>[last_illicit] = '1'</b>      | <b>Last opioid(s) used before ED visit</b><br><i>Brand names listed in parantheses</i><br><br>                                     | <b>checkbox, Required</b><br><table border="1"> <tr> <td>1</td> <td>last_opioid_type_1</td> <td>Heroin</td> </tr> <tr> <td>2</td> <td>last_opioid_type_2</td> <td>Oxycodone (OxyContin, Percocet, Roxicodone, etc.)</td> </tr> <tr> <td>3</td> <td>last_opioid_type_3</td> <td>Hydrocodone (Norco, Vicodin, etc.)</td> </tr> <tr> <td>4</td> <td>last_opioid_type_4</td> <td>Fentanyl (Duragesic, Ionsys)</td> </tr> <tr> <td>5</td> <td>last_opioid_type_5</td> <td>Hydromorphone (Dilaudid)</td> </tr> <tr> <td>6</td> <td>last_opioid_type_6</td> <td>Morphine</td> </tr> <tr> <td>7</td> <td>last_opioid_type_7</td> <td>Other</td> </tr> <tr> <td>999</td> <td>last_opioid_type_999</td> <td>Unknown</td> </tr> </table> | 1 | last_opioid_type_1 | Heroin       | 2                 | last_opioid_type_2 | Oxycodone (OxyContin, Percocet, Roxicodone, etc.) | 3 | last_opioid_type_3 | Hydrocodone (Norco, Vicodin, etc.) | 4 | last_opioid_type_4 | Fentanyl (Duragesic, Ionsys) | 5 | last_opioid_type_5 | Hydromorphone (Dilaudid) | 6 | last_opioid_type_6 | Morphine                | 7 | last_opioid_type_7 | Other           | 999 | last_opioid_type_999 | Unknown           |
| 1   | last_opioid_type_1                                                                                | Heroin                                                                                                                             |                                                                                                                                                                                                                                                                                                                                                                                                                                                                                                                                                                                                                                                                                                                               |   |                    |              |                   |                    |                                                   |   |                    |                                    |   |                    |                              |   |                    |                          |   |                    |                         |   |                    |                 |     |                      |                   |
| 2   | last_opioid_type_2                                                                                | Oxycodone (OxyContin, Percocet, Roxicodone, etc.)                                                                                  |                                                                                                                                                                                                                                                                                                                                                                                                                                                                                                                                                                                                                                                                                                                               |   |                    |              |                   |                    |                                                   |   |                    |                                    |   |                    |                              |   |                    |                          |   |                    |                         |   |                    |                 |     |                      |                   |
| 3   | last_opioid_type_3                                                                                | Hydrocodone (Norco, Vicodin, etc.)                                                                                                 |                                                                                                                                                                                                                                                                                                                                                                                                                                                                                                                                                                                                                                                                                                                               |   |                    |              |                   |                    |                                                   |   |                    |                                    |   |                    |                              |   |                    |                          |   |                    |                         |   |                    |                 |     |                      |                   |
| 4   | last_opioid_type_4                                                                                | Fentanyl (Duragesic, Ionsys)                                                                                                       |                                                                                                                                                                                                                                                                                                                                                                                                                                                                                                                                                                                                                                                                                                                               |   |                    |              |                   |                    |                                                   |   |                    |                                    |   |                    |                              |   |                    |                          |   |                    |                         |   |                    |                 |     |                      |                   |
| 5   | last_opioid_type_5                                                                                | Hydromorphone (Dilaudid)                                                                                                           |                                                                                                                                                                                                                                                                                                                                                                                                                                                                                                                                                                                                                                                                                                                               |   |                    |              |                   |                    |                                                   |   |                    |                                    |   |                    |                              |   |                    |                          |   |                    |                         |   |                    |                 |     |                      |                   |
| 6   | last_opioid_type_6                                                                                | Morphine                                                                                                                           |                                                                                                                                                                                                                                                                                                                                                                                                                                                                                                                                                                                                                                                                                                                               |   |                    |              |                   |                    |                                                   |   |                    |                                    |   |                    |                              |   |                    |                          |   |                    |                         |   |                    |                 |     |                      |                   |
| 7   | last_opioid_type_7                                                                                | Other                                                                                                                              |                                                                                                                                                                                                                                                                                                                                                                                                                                                                                                                                                                                                                                                                                                                               |   |                    |              |                   |                    |                                                   |   |                    |                                    |   |                    |                              |   |                    |                          |   |                    |                         |   |                    |                 |     |                      |                   |
| 999 | last_opioid_type_999                                                                              | Unknown                                                                                                                            |                                                                                                                                                                                                                                                                                                                                                                                                                                                                                                                                                                                                                                                                                                                               |   |                    |              |                   |                    |                                                   |   |                    |                                    |   |                    |                              |   |                    |                          |   |                    |                         |   |                    |                 |     |                      |                   |
| 547 | <b>last_heroin_mx</b><br><br><b>Show the field ONLY if:</b><br><b>[last_opioid_type(1)] = '1'</b> | <b>Section Header: Last Heroin Use</b><br><br><b>Are there discrepant values documented for when the patient last used heroin?</b> | <b>yesno, Required</b><br><table border="1"> <tr> <td>1</td> <td>Yes</td> </tr> <tr> <td>0</td> <td>No</td> </tr> </table>                                                                                                                                                                                                                                                                                                                                                                                                                                                                                                                                                                                                    | 1 | Yes                | 0            | No                |                    |                                                   |   |                    |                                    |   |                    |                              |   |                    |                          |   |                    |                         |   |                    |                 |     |                      |                   |
| 1   | Yes                                                                                               |                                                                                                                                    |                                                                                                                                                                                                                                                                                                                                                                                                                                                                                                                                                                                                                                                                                                                               |   |                    |              |                   |                    |                                                   |   |                    |                                    |   |                    |                              |   |                    |                          |   |                    |                         |   |                    |                 |     |                      |                   |
| 0   | No                                                                                                |                                                                                                                                    |                                                                                                                                                                                                                                                                                                                                                                                                                                                                                                                                                                                                                                                                                                                               |   |                    |              |                   |                    |                                                   |   |                    |                                    |   |                    |                              |   |                    |                          |   |                    |                         |   |                    |                 |     |                      |                   |
| 548 | <b>heroin_old</b><br><br><b>Show the field ONLY if:</b><br><b>[last_heroin_mx] = '1'</b>          | <b>Oldest heroin use documented</b><br><i>Enter numerical value.</i>                                                               | <b>text, Required</b><br><br>                                                                                                                                                                                                                                                                                                                                                                                                                                                                                                                                                                                                                                                                                                 |   |                    |              |                   |                    |                                                   |   |                    |                                    |   |                    |                              |   |                    |                          |   |                    |                         |   |                    |                 |     |                      |                   |
| 549 | <b>heroin_new</b><br><br><b>Show the field ONLY if:</b><br><b>[last_heroin_mx] = '1'</b>          | <b>Most recent heroin use documented</b><br><i>Enter numerical value.</i>                                                          | <b>text, Required</b><br><br>                                                                                                                                                                                                                                                                                                                                                                                                                                                                                                                                                                                                                                                                                                 |   |                    |              |                   |                    |                                                   |   |                    |                                    |   |                    |                              |   |                    |                          |   |                    |                         |   |                    |                 |     |                      |                   |
| 550 | <b>heroin_avg</b><br><br><b>Show the field ONLY if:</b><br><b>[last_heroin_mx] = '1'</b>          | <b>Average</b><br><br>                                                                                                             | <b>calc, Required</b><br><b>Calculation: mean([heroin_old], [heroin_new])</b>                                                                                                                                                                                                                                                                                                                                                                                                                                                                                                                                                                                                                                                 |   |                    |              |                   |                    |                                                   |   |                    |                                    |   |                    |                              |   |                    |                          |   |                    |                         |   |                    |                 |     |                      |                   |

|     |                                                                                    |                                                                                                                                      |                                                                                                                                                                                                                                                                                                                            |   |                     |           |      |                     |       |   |                     |       |            |                       |                 |
|-----|------------------------------------------------------------------------------------|--------------------------------------------------------------------------------------------------------------------------------------|----------------------------------------------------------------------------------------------------------------------------------------------------------------------------------------------------------------------------------------------------------------------------------------------------------------------------|---|---------------------|-----------|------|---------------------|-------|---|---------------------|-------|------------|-----------------------|-----------------|
| 551 | <b>last_heroin_use</b><br>Show the field ONLY if:<br>[last_heroin_mx] = '0'        | <b>Last heroin use</b><br><i>Enter 999 if unknown. Use numerical value.</i>                                                          | <b>text, Required</b>                                                                                                                                                                                                                                                                                                      |   |                     |           |      |                     |       |   |                     |       |            |                       |                 |
| 552 | <b>last_heroin_unit</b><br>Show the field ONLY if:<br>[last_opioid_type(1)] = '1'  | <b>Unit of time</b>                                                                                                                  | <b>radio, Required</b><br><table border="1"> <tr><td>1</td><td>Hours</td></tr> <tr><td>2</td><td>Days</td></tr> <tr><td>3</td><td>Weeks</td></tr> <tr><td>4</td><td>Months</td></tr> <tr><td>5</td><td>Years</td></tr> <tr><td>999</td><td>Unknown/Unclear</td></tr> </table>                                              | 1 | Hours               | 2         | Days | 3                   | Weeks | 4 | Months              | 5     | Years      | 999                   | Unknown/Unclear |
| 1   | Hours                                                                              |                                                                                                                                      |                                                                                                                                                                                                                                                                                                                            |   |                     |           |      |                     |       |   |                     |       |            |                       |                 |
| 2   | Days                                                                               |                                                                                                                                      |                                                                                                                                                                                                                                                                                                                            |   |                     |           |      |                     |       |   |                     |       |            |                       |                 |
| 3   | Weeks                                                                              |                                                                                                                                      |                                                                                                                                                                                                                                                                                                                            |   |                     |           |      |                     |       |   |                     |       |            |                       |                 |
| 4   | Months                                                                             |                                                                                                                                      |                                                                                                                                                                                                                                                                                                                            |   |                     |           |      |                     |       |   |                     |       |            |                       |                 |
| 5   | Years                                                                              |                                                                                                                                      |                                                                                                                                                                                                                                                                                                                            |   |                     |           |      |                     |       |   |                     |       |            |                       |                 |
| 999 | Unknown/Unclear                                                                    |                                                                                                                                      |                                                                                                                                                                                                                                                                                                                            |   |                     |           |      |                     |       |   |                     |       |            |                       |                 |
| 553 | <b>last_heroin_amt</b><br>Show the field ONLY if:<br>[last_opioid_type(1)] = '1'   | <b>Is the amount of last heroin use documented?</b>                                                                                  | <b>yesno, Required</b><br><table border="1"> <tr><td>1</td><td>Yes</td></tr> <tr><td>0</td><td>No</td></tr> </table>                                                                                                                                                                                                       | 1 | Yes                 | 0         | No   |                     |       |   |                     |       |            |                       |                 |
| 1   | Yes                                                                                |                                                                                                                                      |                                                                                                                                                                                                                                                                                                                            |   |                     |           |      |                     |       |   |                     |       |            |                       |                 |
| 0   | No                                                                                 |                                                                                                                                      |                                                                                                                                                                                                                                                                                                                            |   |                     |           |      |                     |       |   |                     |       |            |                       |                 |
| 554 | <b>last_heroin_amt_type</b><br>Show the field ONLY if:<br>[last_heroin_amt] = '1'  | <b>Amount type</b>                                                                                                                   | <b>radio, Required</b><br><table border="1"> <tr><td>1</td><td>grams</td></tr> <tr><td>2</td><td>\$</td></tr> <tr><td>3</td><td>bags</td></tr> <tr><td>4</td><td>pills</td></tr> <tr><td>5</td><td>milligrams</td></tr> <tr><td>6</td><td>micrograms</td></tr> </table>                                                    | 1 | grams               | 2         | \$   | 3                   | bags  | 4 | pills               | 5     | milligrams | 6                     | micrograms      |
| 1   | grams                                                                              |                                                                                                                                      |                                                                                                                                                                                                                                                                                                                            |   |                     |           |      |                     |       |   |                     |       |            |                       |                 |
| 2   | \$                                                                                 |                                                                                                                                      |                                                                                                                                                                                                                                                                                                                            |   |                     |           |      |                     |       |   |                     |       |            |                       |                 |
| 3   | bags                                                                               |                                                                                                                                      |                                                                                                                                                                                                                                                                                                                            |   |                     |           |      |                     |       |   |                     |       |            |                       |                 |
| 4   | pills                                                                              |                                                                                                                                      |                                                                                                                                                                                                                                                                                                                            |   |                     |           |      |                     |       |   |                     |       |            |                       |                 |
| 5   | milligrams                                                                         |                                                                                                                                      |                                                                                                                                                                                                                                                                                                                            |   |                     |           |      |                     |       |   |                     |       |            |                       |                 |
| 6   | micrograms                                                                         |                                                                                                                                      |                                                                                                                                                                                                                                                                                                                            |   |                     |           |      |                     |       |   |                     |       |            |                       |                 |
| 555 | <b>last_heroin_amt_spec</b><br>Show the field ONLY if:<br>[last_heroin_amt] = '1'  | <b>Please specify amount used</b><br><i>Enter numerical value. E.g., if "2 grams," enter "2." Enter "999" if unknown.</i>            | <b>text, Required</b>                                                                                                                                                                                                                                                                                                      |   |                     |           |      |                     |       |   |                     |       |            |                       |                 |
| 556 | <b>last_heroin_route</b><br>Show the field ONLY if:<br>[last_opioid_type(1)] = '1' | <b>Route of Administration</b>                                                                                                       | <b>checkbox, Required</b><br><table border="1"> <tr><td>1</td><td>last_heroin_route_1</td><td>Injection</td></tr> <tr><td>2</td><td>last_heroin_route_2</td><td>Snort</td></tr> <tr><td>3</td><td>last_heroin_route_3</td><td>Smoke</td></tr> <tr><td>999</td><td>last_heroin_route_999</td><td>Unknown</td></tr> </table> | 1 | last_heroin_route_1 | Injection | 2    | last_heroin_route_2 | Snort | 3 | last_heroin_route_3 | Smoke | 999        | last_heroin_route_999 | Unknown         |
| 1   | last_heroin_route_1                                                                | Injection                                                                                                                            |                                                                                                                                                                                                                                                                                                                            |   |                     |           |      |                     |       |   |                     |       |            |                       |                 |
| 2   | last_heroin_route_2                                                                | Snort                                                                                                                                |                                                                                                                                                                                                                                                                                                                            |   |                     |           |      |                     |       |   |                     |       |            |                       |                 |
| 3   | last_heroin_route_3                                                                | Smoke                                                                                                                                |                                                                                                                                                                                                                                                                                                                            |   |                     |           |      |                     |       |   |                     |       |            |                       |                 |
| 999 | last_heroin_route_999                                                              | Unknown                                                                                                                              |                                                                                                                                                                                                                                                                                                                            |   |                     |           |      |                     |       |   |                     |       |            |                       |                 |
| 557 | <b>last_oxy_mx</b><br>Show the field ONLY if:<br>[last_opioid_type(2)] = '1'       | <b>Section Header: Last Oxycodone Use</b><br><b>Are there discrepant values documented for when the patient last used oxycodone?</b> | <b>yesno, Required</b><br><table border="1"> <tr><td>1</td><td>Yes</td></tr> <tr><td>0</td><td>No</td></tr> </table>                                                                                                                                                                                                       | 1 | Yes                 | 0         | No   |                     |       |   |                     |       |            |                       |                 |
| 1   | Yes                                                                                |                                                                                                                                      |                                                                                                                                                                                                                                                                                                                            |   |                     |           |      |                     |       |   |                     |       |            |                       |                 |
| 0   | No                                                                                 |                                                                                                                                      |                                                                                                                                                                                                                                                                                                                            |   |                     |           |      |                     |       |   |                     |       |            |                       |                 |
| 558 | <b>oxy_old</b><br>Show the field ONLY if:<br>[last_oxy_mx] = '1'                   | <b>Oldest oxycodone use documented</b><br><i>Enter numerical value.</i>                                                              | <b>text, Required</b>                                                                                                                                                                                                                                                                                                      |   |                     |           |      |                     |       |   |                     |       |            |                       |                 |
| 559 | <b>oxy_new</b><br>Show the field ONLY if:<br>[last_oxy_mx] = '1'                   | <b>Most recent oxycodone use documented</b><br><i>Enter numerical value.</i>                                                         | <b>text, Required</b>                                                                                                                                                                                                                                                                                                      |   |                     |           |      |                     |       |   |                     |       |            |                       |                 |
| 560 | <b>oxy_avg</b><br>Show the field ONLY if:<br>[last_oxy_mx] = '1'                   | <b>Average</b>                                                                                                                       | <b>calc, Required</b><br><b>Calculation: mean([oxy_old] , [oxy_new])</b>                                                                                                                                                                                                                                                   |   |                     |           |      |                     |       |   |                     |       |            |                       |                 |

| 561      | <b>last_oxy_use</b><br><b>Show the field ONLY if:</b><br><b>[last_oxy_mx] = '0'</b>           | <b>Last oxycodone use</b><br><i>Enter 999 if unknown. Use numerical value.</i>                                                           | <b>text, Required</b>                                                                                                                                                                                                                                                                                                                                                                                       |          |                  |           |      |                  |       |   |                  |       |            |                  |                 |     |                    |         |
|----------|-----------------------------------------------------------------------------------------------|------------------------------------------------------------------------------------------------------------------------------------------|-------------------------------------------------------------------------------------------------------------------------------------------------------------------------------------------------------------------------------------------------------------------------------------------------------------------------------------------------------------------------------------------------------------|----------|------------------|-----------|------|------------------|-------|---|------------------|-------|------------|------------------|-----------------|-----|--------------------|---------|
| 562      | <b>last_oxy_unit</b><br><b>Show the field ONLY if:</b><br><b>[last_opioid_type(2)] = '1'</b>  | <b>Unit of time</b>                                                                                                                      | <b>radio, Required</b><br><table border="1"> <tr><td>1</td><td>Hours</td></tr> <tr><td>2</td><td>Days</td></tr> <tr><td>3</td><td>Weeks</td></tr> <tr><td>4</td><td>Months</td></tr> <tr><td>5</td><td>Years</td></tr> <tr><td>999</td><td>Unknown/Unclear</td></tr> </table>                                                                                                                               | 1        | Hours            | 2         | Days | 3                | Weeks | 4 | Months           | 5     | Years      | 999              | Unknown/Unclear |     |                    |         |
| 1        | Hours                                                                                         |                                                                                                                                          |                                                                                                                                                                                                                                                                                                                                                                                                             |          |                  |           |      |                  |       |   |                  |       |            |                  |                 |     |                    |         |
| 2        | Days                                                                                          |                                                                                                                                          |                                                                                                                                                                                                                                                                                                                                                                                                             |          |                  |           |      |                  |       |   |                  |       |            |                  |                 |     |                    |         |
| 3        | Weeks                                                                                         |                                                                                                                                          |                                                                                                                                                                                                                                                                                                                                                                                                             |          |                  |           |      |                  |       |   |                  |       |            |                  |                 |     |                    |         |
| 4        | Months                                                                                        |                                                                                                                                          |                                                                                                                                                                                                                                                                                                                                                                                                             |          |                  |           |      |                  |       |   |                  |       |            |                  |                 |     |                    |         |
| 5        | Years                                                                                         |                                                                                                                                          |                                                                                                                                                                                                                                                                                                                                                                                                             |          |                  |           |      |                  |       |   |                  |       |            |                  |                 |     |                    |         |
| 999      | Unknown/Unclear                                                                               |                                                                                                                                          |                                                                                                                                                                                                                                                                                                                                                                                                             |          |                  |           |      |                  |       |   |                  |       |            |                  |                 |     |                    |         |
| 563      | <b>last_oxy_amt</b><br><b>Show the field ONLY if:</b><br><b>[last_opioid_type(2)] = '1'</b>   | <b>Is the amount of last illicit oxycodone use documented?</b>                                                                           | <b>yesno, Required</b><br><table border="1"> <tr><td>1</td><td>Yes</td></tr> <tr><td>0</td><td>No</td></tr> </table>                                                                                                                                                                                                                                                                                        | 1        | Yes              | 0         | No   |                  |       |   |                  |       |            |                  |                 |     |                    |         |
| 1        | Yes                                                                                           |                                                                                                                                          |                                                                                                                                                                                                                                                                                                                                                                                                             |          |                  |           |      |                  |       |   |                  |       |            |                  |                 |     |                    |         |
| 0        | No                                                                                            |                                                                                                                                          |                                                                                                                                                                                                                                                                                                                                                                                                             |          |                  |           |      |                  |       |   |                  |       |            |                  |                 |     |                    |         |
| 564      | <b>last_oxy_amt_type</b><br><b>Show the field ONLY if:</b><br><b>[last_oxy_amt] = '1'</b>     | <b>Amount type</b>                                                                                                                       | <b>radio, Required</b><br><table border="1"> <tr><td>1</td><td>grams</td></tr> <tr><td>2</td><td>\$</td></tr> <tr><td>3</td><td>bags</td></tr> <tr><td>4</td><td>pills</td></tr> <tr><td>5</td><td>milligrams</td></tr> <tr><td>6</td><td>micrograms</td></tr> </table>                                                                                                                                     | 1        | grams            | 2         | \$   | 3                | bags  | 4 | pills            | 5     | milligrams | 6                | micrograms      |     |                    |         |
| 1        | grams                                                                                         |                                                                                                                                          |                                                                                                                                                                                                                                                                                                                                                                                                             |          |                  |           |      |                  |       |   |                  |       |            |                  |                 |     |                    |         |
| 2        | \$                                                                                            |                                                                                                                                          |                                                                                                                                                                                                                                                                                                                                                                                                             |          |                  |           |      |                  |       |   |                  |       |            |                  |                 |     |                    |         |
| 3        | bags                                                                                          |                                                                                                                                          |                                                                                                                                                                                                                                                                                                                                                                                                             |          |                  |           |      |                  |       |   |                  |       |            |                  |                 |     |                    |         |
| 4        | pills                                                                                         |                                                                                                                                          |                                                                                                                                                                                                                                                                                                                                                                                                             |          |                  |           |      |                  |       |   |                  |       |            |                  |                 |     |                    |         |
| 5        | milligrams                                                                                    |                                                                                                                                          |                                                                                                                                                                                                                                                                                                                                                                                                             |          |                  |           |      |                  |       |   |                  |       |            |                  |                 |     |                    |         |
| 6        | micrograms                                                                                    |                                                                                                                                          |                                                                                                                                                                                                                                                                                                                                                                                                             |          |                  |           |      |                  |       |   |                  |       |            |                  |                 |     |                    |         |
| 565      | <b>last_oxy_amt_spec</b><br><b>Show the field ONLY if:</b><br><b>[last_oxy_amt] = '1'</b>     | <b>Please specify amount used</b><br><i>Enter numerical value. E.g., if "2 grams," enter "2." Enter "999" if unknown.</i>                | <b>text, Required</b>                                                                                                                                                                                                                                                                                                                                                                                       |          |                  |           |      |                  |       |   |                  |       |            |                  |                 |     |                    |         |
| 566      | <b>last_oxy_route</b><br><b>Show the field ONLY if:</b><br><b>[last_opioid_type(2)] = '1'</b> | <b>Route of Administration</b>                                                                                                           | <table border="1"> <thead> <tr> <th>checkbox</th> <th>last_oxy_route_1</th> <th>Injection</th> </tr> </thead> <tbody> <tr> <td>2</td> <td>last_oxy_route_2</td> <td>Snort</td> </tr> <tr> <td>3</td> <td>last_oxy_route_3</td> <td>Smoke</td> </tr> <tr> <td>4</td> <td>last_oxy_route_4</td> <td>Swallow</td> </tr> <tr> <td>999</td> <td>last_oxy_route_999</td> <td>Unknown</td> </tr> </tbody> </table> | checkbox | last_oxy_route_1 | Injection | 2    | last_oxy_route_2 | Snort | 3 | last_oxy_route_3 | Smoke | 4          | last_oxy_route_4 | Swallow         | 999 | last_oxy_route_999 | Unknown |
| checkbox | last_oxy_route_1                                                                              | Injection                                                                                                                                |                                                                                                                                                                                                                                                                                                                                                                                                             |          |                  |           |      |                  |       |   |                  |       |            |                  |                 |     |                    |         |
| 2        | last_oxy_route_2                                                                              | Snort                                                                                                                                    |                                                                                                                                                                                                                                                                                                                                                                                                             |          |                  |           |      |                  |       |   |                  |       |            |                  |                 |     |                    |         |
| 3        | last_oxy_route_3                                                                              | Smoke                                                                                                                                    |                                                                                                                                                                                                                                                                                                                                                                                                             |          |                  |           |      |                  |       |   |                  |       |            |                  |                 |     |                    |         |
| 4        | last_oxy_route_4                                                                              | Swallow                                                                                                                                  |                                                                                                                                                                                                                                                                                                                                                                                                             |          |                  |           |      |                  |       |   |                  |       |            |                  |                 |     |                    |         |
| 999      | last_oxy_route_999                                                                            | Unknown                                                                                                                                  |                                                                                                                                                                                                                                                                                                                                                                                                             |          |                  |           |      |                  |       |   |                  |       |            |                  |                 |     |                    |         |
| 567      | <b>last_hyd_mx</b><br><b>Show the field ONLY if:</b><br><b>[last_opioid_type(3)] = '1'</b>    | <b>Section Header: Last Hydrocodone Use</b><br><b>Are there discrepant values documented for when the patient last used hydrocodone?</b> | <b>yesno, Required</b><br><table border="1"> <tr><td>1</td><td>Yes</td></tr> <tr><td>0</td><td>No</td></tr> </table>                                                                                                                                                                                                                                                                                        | 1        | Yes              | 0         | No   |                  |       |   |                  |       |            |                  |                 |     |                    |         |
| 1        | Yes                                                                                           |                                                                                                                                          |                                                                                                                                                                                                                                                                                                                                                                                                             |          |                  |           |      |                  |       |   |                  |       |            |                  |                 |     |                    |         |
| 0        | No                                                                                            |                                                                                                                                          |                                                                                                                                                                                                                                                                                                                                                                                                             |          |                  |           |      |                  |       |   |                  |       |            |                  |                 |     |                    |         |
| 568      | <b>hyd_old</b><br><b>Show the field ONLY if:</b><br><b>[last_hyd_mx] = '1'</b>                | <b>Oldest hydrocodone use documented</b><br><i>Enter numerical value.</i>                                                                | <b>text, Required</b>                                                                                                                                                                                                                                                                                                                                                                                       |          |                  |           |      |                  |       |   |                  |       |            |                  |                 |     |                    |         |
| 569      | <b>hyd_new</b><br><b>Show the field ONLY if:</b><br><b>[last_hyd_mx] = '1'</b>                | <b>Most recent hydrocodone use documented</b><br><i>Enter numerical value.</i>                                                           | <b>text, Required</b>                                                                                                                                                                                                                                                                                                                                                                                       |          |                  |           |      |                  |       |   |                  |       |            |                  |                 |     |                    |         |
| 570      | <b>hyd_avg</b><br><b>Show the field ONLY if:</b><br><b>[last_hyd_mx] = '1'</b>                | <b>Average</b>                                                                                                                           | <b>calc, Required</b><br><b>Calculation: mean([hyd_old] , [hyd_new])</b>                                                                                                                                                                                                                                                                                                                                    |          |                  |           |      |                  |       |   |                  |       |            |                  |                 |     |                    |         |

|     |                                                                                 |                                                                                                                                    |                                                                                                                                                                                                                                                                                                                                                                      |   |                  |           |      |                  |       |   |                  |       |            |                  |                 |     |                    |         |
|-----|---------------------------------------------------------------------------------|------------------------------------------------------------------------------------------------------------------------------------|----------------------------------------------------------------------------------------------------------------------------------------------------------------------------------------------------------------------------------------------------------------------------------------------------------------------------------------------------------------------|---|------------------|-----------|------|------------------|-------|---|------------------|-------|------------|------------------|-----------------|-----|--------------------|---------|
| 571 | <b>last_hyd_use</b><br>Show the field ONLY if:<br>[last_hyd_mx] = '0'           | <b>Last hydrocodone use</b><br><i>Enter 999 if unknown. Use numerical value.</i>                                                   | text, Required                                                                                                                                                                                                                                                                                                                                                       |   |                  |           |      |                  |       |   |                  |       |            |                  |                 |     |                    |         |
| 572 | <b>last_hyd_unit</b><br>Show the field ONLY if:<br>[last_opioid_type(3)] = '1'  | <b>Unit of time</b>                                                                                                                | radio, Required<br><table border="1"> <tr><td>1</td><td>Hours</td></tr> <tr><td>2</td><td>Days</td></tr> <tr><td>3</td><td>Weeks</td></tr> <tr><td>4</td><td>Months</td></tr> <tr><td>5</td><td>Years</td></tr> <tr><td>999</td><td>Unknown/Unclear</td></tr> </table>                                                                                               | 1 | Hours            | 2         | Days | 3                | Weeks | 4 | Months           | 5     | Years      | 999              | Unknown/Unclear |     |                    |         |
| 1   | Hours                                                                           |                                                                                                                                    |                                                                                                                                                                                                                                                                                                                                                                      |   |                  |           |      |                  |       |   |                  |       |            |                  |                 |     |                    |         |
| 2   | Days                                                                            |                                                                                                                                    |                                                                                                                                                                                                                                                                                                                                                                      |   |                  |           |      |                  |       |   |                  |       |            |                  |                 |     |                    |         |
| 3   | Weeks                                                                           |                                                                                                                                    |                                                                                                                                                                                                                                                                                                                                                                      |   |                  |           |      |                  |       |   |                  |       |            |                  |                 |     |                    |         |
| 4   | Months                                                                          |                                                                                                                                    |                                                                                                                                                                                                                                                                                                                                                                      |   |                  |           |      |                  |       |   |                  |       |            |                  |                 |     |                    |         |
| 5   | Years                                                                           |                                                                                                                                    |                                                                                                                                                                                                                                                                                                                                                                      |   |                  |           |      |                  |       |   |                  |       |            |                  |                 |     |                    |         |
| 999 | Unknown/Unclear                                                                 |                                                                                                                                    |                                                                                                                                                                                                                                                                                                                                                                      |   |                  |           |      |                  |       |   |                  |       |            |                  |                 |     |                    |         |
| 573 | <b>last_hyd_amt</b><br>Show the field ONLY if:<br>[last_opioid_type(3)] = '1'   | <b>Is the amount of last illicit hydrocodone use documented?</b>                                                                   | yesno, Required<br><table border="1"> <tr><td>1</td><td>Yes</td></tr> <tr><td>0</td><td>No</td></tr> </table>                                                                                                                                                                                                                                                        | 1 | Yes              | 0         | No   |                  |       |   |                  |       |            |                  |                 |     |                    |         |
| 1   | Yes                                                                             |                                                                                                                                    |                                                                                                                                                                                                                                                                                                                                                                      |   |                  |           |      |                  |       |   |                  |       |            |                  |                 |     |                    |         |
| 0   | No                                                                              |                                                                                                                                    |                                                                                                                                                                                                                                                                                                                                                                      |   |                  |           |      |                  |       |   |                  |       |            |                  |                 |     |                    |         |
| 574 | <b>last_hyd_amt_type</b><br>Show the field ONLY if:<br>[last_hyd_amt] = '1'     | <b>Amount type</b>                                                                                                                 | radio, Required<br><table border="1"> <tr><td>1</td><td>grams</td></tr> <tr><td>2</td><td>\$</td></tr> <tr><td>3</td><td>bags</td></tr> <tr><td>4</td><td>pills</td></tr> <tr><td>5</td><td>milligrams</td></tr> <tr><td>6</td><td>micrograms</td></tr> </table>                                                                                                     | 1 | grams            | 2         | \$   | 3                | bags  | 4 | pills            | 5     | milligrams | 6                | micrograms      |     |                    |         |
| 1   | grams                                                                           |                                                                                                                                    |                                                                                                                                                                                                                                                                                                                                                                      |   |                  |           |      |                  |       |   |                  |       |            |                  |                 |     |                    |         |
| 2   | \$                                                                              |                                                                                                                                    |                                                                                                                                                                                                                                                                                                                                                                      |   |                  |           |      |                  |       |   |                  |       |            |                  |                 |     |                    |         |
| 3   | bags                                                                            |                                                                                                                                    |                                                                                                                                                                                                                                                                                                                                                                      |   |                  |           |      |                  |       |   |                  |       |            |                  |                 |     |                    |         |
| 4   | pills                                                                           |                                                                                                                                    |                                                                                                                                                                                                                                                                                                                                                                      |   |                  |           |      |                  |       |   |                  |       |            |                  |                 |     |                    |         |
| 5   | milligrams                                                                      |                                                                                                                                    |                                                                                                                                                                                                                                                                                                                                                                      |   |                  |           |      |                  |       |   |                  |       |            |                  |                 |     |                    |         |
| 6   | micrograms                                                                      |                                                                                                                                    |                                                                                                                                                                                                                                                                                                                                                                      |   |                  |           |      |                  |       |   |                  |       |            |                  |                 |     |                    |         |
| 575 | <b>last_hyd_amt_spec</b><br>Show the field ONLY if:<br>[last_hyd_amt] = '1'     | <b>Please specify amount used</b><br><i>Enter numerical value. E.g., if "2 grams," enter "2." Enter "999" if unknown.</i>          | text, Required                                                                                                                                                                                                                                                                                                                                                       |   |                  |           |      |                  |       |   |                  |       |            |                  |                 |     |                    |         |
| 576 | <b>last_hyd_route</b><br>Show the field ONLY if:<br>[last_opioid_type(3)] = '1' | <b>Route of Administration</b>                                                                                                     | checkbox, Required<br><table border="1"> <tr><td>1</td><td>last_hyd_route_1</td><td>Injection</td></tr> <tr><td>2</td><td>last_hyd_route_2</td><td>Snort</td></tr> <tr><td>3</td><td>last_hyd_route_3</td><td>Smoke</td></tr> <tr><td>4</td><td>last_hyd_route_4</td><td>Swallow</td></tr> <tr><td>999</td><td>last_hyd_route_999</td><td>Unknown</td></tr> </table> | 1 | last_hyd_route_1 | Injection | 2    | last_hyd_route_2 | Snort | 3 | last_hyd_route_3 | Smoke | 4          | last_hyd_route_4 | Swallow         | 999 | last_hyd_route_999 | Unknown |
| 1   | last_hyd_route_1                                                                | Injection                                                                                                                          |                                                                                                                                                                                                                                                                                                                                                                      |   |                  |           |      |                  |       |   |                  |       |            |                  |                 |     |                    |         |
| 2   | last_hyd_route_2                                                                | Snort                                                                                                                              |                                                                                                                                                                                                                                                                                                                                                                      |   |                  |           |      |                  |       |   |                  |       |            |                  |                 |     |                    |         |
| 3   | last_hyd_route_3                                                                | Smoke                                                                                                                              |                                                                                                                                                                                                                                                                                                                                                                      |   |                  |           |      |                  |       |   |                  |       |            |                  |                 |     |                    |         |
| 4   | last_hyd_route_4                                                                | Swallow                                                                                                                            |                                                                                                                                                                                                                                                                                                                                                                      |   |                  |           |      |                  |       |   |                  |       |            |                  |                 |     |                    |         |
| 999 | last_hyd_route_999                                                              | Unknown                                                                                                                            |                                                                                                                                                                                                                                                                                                                                                                      |   |                  |           |      |                  |       |   |                  |       |            |                  |                 |     |                    |         |
| 577 | <b>last_fent_mx</b><br>Show the field ONLY if:<br>[last_opioid_type(4)] = '1'   | <b>Section Header: Last Fentanyl Use</b><br><b>Are there discrepant values documented for when the patient last used fentanyl?</b> | yesno, Required<br><table border="1"> <tr><td>1</td><td>Yes</td></tr> <tr><td>0</td><td>No</td></tr> </table>                                                                                                                                                                                                                                                        | 1 | Yes              | 0         | No   |                  |       |   |                  |       |            |                  |                 |     |                    |         |
| 1   | Yes                                                                             |                                                                                                                                    |                                                                                                                                                                                                                                                                                                                                                                      |   |                  |           |      |                  |       |   |                  |       |            |                  |                 |     |                    |         |
| 0   | No                                                                              |                                                                                                                                    |                                                                                                                                                                                                                                                                                                                                                                      |   |                  |           |      |                  |       |   |                  |       |            |                  |                 |     |                    |         |
| 578 | <b>fent_old</b><br>Show the field ONLY if:<br>[last_fent_mx] = '1'              | <b>Oldest fentanyl use documented</b><br><i>Enter numerical value.</i>                                                             | text, Required                                                                                                                                                                                                                                                                                                                                                       |   |                  |           |      |                  |       |   |                  |       |            |                  |                 |     |                    |         |
| 579 | <b>fent_new</b><br>Show the field ONLY if:<br>[last_fent_mx] = '1'              | <b>Most recent fentanyl use documented</b><br><i>Enter numerical value.</i>                                                        | text, Required                                                                                                                                                                                                                                                                                                                                                       |   |                  |           |      |                  |       |   |                  |       |            |                  |                 |     |                    |         |
| 580 | <b>fent_avg</b><br>Show the field ONLY if:<br>[last_fent_mx] = '1'              | <b>Average</b>                                                                                                                     | calc, Required<br>Calculation: mean([fent_old] , [fent_new])                                                                                                                                                                                                                                                                                                         |   |                  |           |      |                  |       |   |                  |       |            |                  |                 |     |                    |         |

|     |                                                                                                |                                                                                                                                                     |                                                                                                                                                                                                                                                                                                                                                                                                                                                                                                                             |   |                          |                  |             |                          |              |   |                          |              |                   |                          |                        |   |                          |              |     |                            |                |
|-----|------------------------------------------------------------------------------------------------|-----------------------------------------------------------------------------------------------------------------------------------------------------|-----------------------------------------------------------------------------------------------------------------------------------------------------------------------------------------------------------------------------------------------------------------------------------------------------------------------------------------------------------------------------------------------------------------------------------------------------------------------------------------------------------------------------|---|--------------------------|------------------|-------------|--------------------------|--------------|---|--------------------------|--------------|-------------------|--------------------------|------------------------|---|--------------------------|--------------|-----|----------------------------|----------------|
| 581 | <b>last_fent_use</b><br><b>Show the field ONLY if:</b><br><b>[last_fent_mx] = '0'</b>          | <b>Last fentanyl use</b><br><i>Enter 999 if unknown. Use numerical value.</i>                                                                       | <b>text, Required</b>                                                                                                                                                                                                                                                                                                                                                                                                                                                                                                       |   |                          |                  |             |                          |              |   |                          |              |                   |                          |                        |   |                          |              |     |                            |                |
| 582 | <b>last_fent_unit</b><br><b>Show the field ONLY if:</b><br><b>[last_opioid_type(4)] = '1'</b>  | <b>Unit of time</b>                                                                                                                                 | <table border="1"> <tr> <td>1</td> <td><b>Hours</b></td> </tr> <tr> <td>2</td> <td><b>Days</b></td> </tr> <tr> <td>3</td> <td><b>Weeks</b></td> </tr> <tr> <td>4</td> <td><b>Months</b></td> </tr> <tr> <td>5</td> <td><b>Years</b></td> </tr> <tr> <td>999</td> <td><b>Unknown/Unclear</b></td> </tr> </table>                                                                                                                                                                                                             | 1 | <b>Hours</b>             | 2                | <b>Days</b> | 3                        | <b>Weeks</b> | 4 | <b>Months</b>            | 5            | <b>Years</b>      | 999                      | <b>Unknown/Unclear</b> |   |                          |              |     |                            |                |
| 1   | <b>Hours</b>                                                                                   |                                                                                                                                                     |                                                                                                                                                                                                                                                                                                                                                                                                                                                                                                                             |   |                          |                  |             |                          |              |   |                          |              |                   |                          |                        |   |                          |              |     |                            |                |
| 2   | <b>Days</b>                                                                                    |                                                                                                                                                     |                                                                                                                                                                                                                                                                                                                                                                                                                                                                                                                             |   |                          |                  |             |                          |              |   |                          |              |                   |                          |                        |   |                          |              |     |                            |                |
| 3   | <b>Weeks</b>                                                                                   |                                                                                                                                                     |                                                                                                                                                                                                                                                                                                                                                                                                                                                                                                                             |   |                          |                  |             |                          |              |   |                          |              |                   |                          |                        |   |                          |              |     |                            |                |
| 4   | <b>Months</b>                                                                                  |                                                                                                                                                     |                                                                                                                                                                                                                                                                                                                                                                                                                                                                                                                             |   |                          |                  |             |                          |              |   |                          |              |                   |                          |                        |   |                          |              |     |                            |                |
| 5   | <b>Years</b>                                                                                   |                                                                                                                                                     |                                                                                                                                                                                                                                                                                                                                                                                                                                                                                                                             |   |                          |                  |             |                          |              |   |                          |              |                   |                          |                        |   |                          |              |     |                            |                |
| 999 | <b>Unknown/Unclear</b>                                                                         |                                                                                                                                                     |                                                                                                                                                                                                                                                                                                                                                                                                                                                                                                                             |   |                          |                  |             |                          |              |   |                          |              |                   |                          |                        |   |                          |              |     |                            |                |
| 583 | <b>last_fent_amt</b><br><b>Show the field ONLY if:</b><br><b>[last_opioid_type(4)] = '1'</b>   | <b>Is the amount of last illicit fentanyl use documented?</b>                                                                                       | <table border="1"> <tr> <td>1</td> <td><b>Yes</b></td> </tr> <tr> <td>0</td> <td><b>No</b></td> </tr> </table>                                                                                                                                                                                                                                                                                                                                                                                                              | 1 | <b>Yes</b>               | 0                | <b>No</b>   |                          |              |   |                          |              |                   |                          |                        |   |                          |              |     |                            |                |
| 1   | <b>Yes</b>                                                                                     |                                                                                                                                                     |                                                                                                                                                                                                                                                                                                                                                                                                                                                                                                                             |   |                          |                  |             |                          |              |   |                          |              |                   |                          |                        |   |                          |              |     |                            |                |
| 0   | <b>No</b>                                                                                      |                                                                                                                                                     |                                                                                                                                                                                                                                                                                                                                                                                                                                                                                                                             |   |                          |                  |             |                          |              |   |                          |              |                   |                          |                        |   |                          |              |     |                            |                |
| 584 | <b>last_fent_amt_type</b><br><b>Show the field ONLY if:</b><br><b>[last_fent_amt] = '1'</b>    | <b>Amount type</b>                                                                                                                                  | <table border="1"> <tr> <td>1</td> <td><b>grams</b></td> </tr> <tr> <td>2</td> <td><b>\$</b></td> </tr> <tr> <td>3</td> <td><b>bags</b></td> </tr> <tr> <td>4</td> <td><b>pills</b></td> </tr> <tr> <td>5</td> <td><b>milligrams</b></td> </tr> <tr> <td>6</td> <td><b>micrograms</b></td> </tr> </table>                                                                                                                                                                                                                   | 1 | <b>grams</b>             | 2                | <b>\$</b>   | 3                        | <b>bags</b>  | 4 | <b>pills</b>             | 5            | <b>milligrams</b> | 6                        | <b>micrograms</b>      |   |                          |              |     |                            |                |
| 1   | <b>grams</b>                                                                                   |                                                                                                                                                     |                                                                                                                                                                                                                                                                                                                                                                                                                                                                                                                             |   |                          |                  |             |                          |              |   |                          |              |                   |                          |                        |   |                          |              |     |                            |                |
| 2   | <b>\$</b>                                                                                      |                                                                                                                                                     |                                                                                                                                                                                                                                                                                                                                                                                                                                                                                                                             |   |                          |                  |             |                          |              |   |                          |              |                   |                          |                        |   |                          |              |     |                            |                |
| 3   | <b>bags</b>                                                                                    |                                                                                                                                                     |                                                                                                                                                                                                                                                                                                                                                                                                                                                                                                                             |   |                          |                  |             |                          |              |   |                          |              |                   |                          |                        |   |                          |              |     |                            |                |
| 4   | <b>pills</b>                                                                                   |                                                                                                                                                     |                                                                                                                                                                                                                                                                                                                                                                                                                                                                                                                             |   |                          |                  |             |                          |              |   |                          |              |                   |                          |                        |   |                          |              |     |                            |                |
| 5   | <b>milligrams</b>                                                                              |                                                                                                                                                     |                                                                                                                                                                                                                                                                                                                                                                                                                                                                                                                             |   |                          |                  |             |                          |              |   |                          |              |                   |                          |                        |   |                          |              |     |                            |                |
| 6   | <b>micrograms</b>                                                                              |                                                                                                                                                     |                                                                                                                                                                                                                                                                                                                                                                                                                                                                                                                             |   |                          |                  |             |                          |              |   |                          |              |                   |                          |                        |   |                          |              |     |                            |                |
| 585 | <b>last_fent_amt_spec</b><br><b>Show the field ONLY if:</b><br><b>[last_fent_amt] = '1'</b>    | <b>Please specify amount used</b><br><i>Enter numerical value. E.g., if "2 grams," enter "2." Enter "999" if unknown.</i>                           | <b>text, Required</b>                                                                                                                                                                                                                                                                                                                                                                                                                                                                                                       |   |                          |                  |             |                          |              |   |                          |              |                   |                          |                        |   |                          |              |     |                            |                |
| 586 | <b>last_fent_route</b><br><b>Show the field ONLY if:</b><br><b>[last_opioid_type(4)] = '1'</b> | <b>Route of Administration</b>                                                                                                                      | <table border="1"> <tr> <td>1</td> <td><b>last_fent_route_1</b></td> <td><b>Injection</b></td> </tr> <tr> <td>2</td> <td><b>last_fent_route_2</b></td> <td><b>Snort</b></td> </tr> <tr> <td>3</td> <td><b>last_fent_route_3</b></td> <td><b>Smoke</b></td> </tr> <tr> <td>4</td> <td><b>last_fent_route_4</b></td> <td><b>Swallow</b></td> </tr> <tr> <td>5</td> <td><b>last_fent_route_5</b></td> <td><b>Patch</b></td> </tr> <tr> <td>999</td> <td><b>last_fent_route_999</b></td> <td><b>Unknown</b></td> </tr> </table> | 1 | <b>last_fent_route_1</b> | <b>Injection</b> | 2           | <b>last_fent_route_2</b> | <b>Snort</b> | 3 | <b>last_fent_route_3</b> | <b>Smoke</b> | 4                 | <b>last_fent_route_4</b> | <b>Swallow</b>         | 5 | <b>last_fent_route_5</b> | <b>Patch</b> | 999 | <b>last_fent_route_999</b> | <b>Unknown</b> |
| 1   | <b>last_fent_route_1</b>                                                                       | <b>Injection</b>                                                                                                                                    |                                                                                                                                                                                                                                                                                                                                                                                                                                                                                                                             |   |                          |                  |             |                          |              |   |                          |              |                   |                          |                        |   |                          |              |     |                            |                |
| 2   | <b>last_fent_route_2</b>                                                                       | <b>Snort</b>                                                                                                                                        |                                                                                                                                                                                                                                                                                                                                                                                                                                                                                                                             |   |                          |                  |             |                          |              |   |                          |              |                   |                          |                        |   |                          |              |     |                            |                |
| 3   | <b>last_fent_route_3</b>                                                                       | <b>Smoke</b>                                                                                                                                        |                                                                                                                                                                                                                                                                                                                                                                                                                                                                                                                             |   |                          |                  |             |                          |              |   |                          |              |                   |                          |                        |   |                          |              |     |                            |                |
| 4   | <b>last_fent_route_4</b>                                                                       | <b>Swallow</b>                                                                                                                                      |                                                                                                                                                                                                                                                                                                                                                                                                                                                                                                                             |   |                          |                  |             |                          |              |   |                          |              |                   |                          |                        |   |                          |              |     |                            |                |
| 5   | <b>last_fent_route_5</b>                                                                       | <b>Patch</b>                                                                                                                                        |                                                                                                                                                                                                                                                                                                                                                                                                                                                                                                                             |   |                          |                  |             |                          |              |   |                          |              |                   |                          |                        |   |                          |              |     |                            |                |
| 999 | <b>last_fent_route_999</b>                                                                     | <b>Unknown</b>                                                                                                                                      |                                                                                                                                                                                                                                                                                                                                                                                                                                                                                                                             |   |                          |                  |             |                          |              |   |                          |              |                   |                          |                        |   |                          |              |     |                            |                |
| 587 | <b>last_hm_mx</b><br><b>Show the field ONLY if:</b><br><b>[last_opioid_type(5)] = '1'</b>      | <b>Section Header:</b> <i>Last Hydromorphone Use</i><br><b>Are there discrepant values documented for when the patient last used hydromorphone?</b> | <table border="1"> <tr> <td>1</td> <td><b>Yes</b></td> </tr> <tr> <td>0</td> <td><b>No</b></td> </tr> </table>                                                                                                                                                                                                                                                                                                                                                                                                              | 1 | <b>Yes</b>               | 0                | <b>No</b>   |                          |              |   |                          |              |                   |                          |                        |   |                          |              |     |                            |                |
| 1   | <b>Yes</b>                                                                                     |                                                                                                                                                     |                                                                                                                                                                                                                                                                                                                                                                                                                                                                                                                             |   |                          |                  |             |                          |              |   |                          |              |                   |                          |                        |   |                          |              |     |                            |                |
| 0   | <b>No</b>                                                                                      |                                                                                                                                                     |                                                                                                                                                                                                                                                                                                                                                                                                                                                                                                                             |   |                          |                  |             |                          |              |   |                          |              |                   |                          |                        |   |                          |              |     |                            |                |
| 588 | <b>hm_old</b><br><b>Show the field ONLY if:</b><br><b>[last_hm_mx] = '1'</b>                   | <b>Oldest hydromorphone use documented</b><br><i>Enter numerical value.</i>                                                                         | <b>text, Required</b>                                                                                                                                                                                                                                                                                                                                                                                                                                                                                                       |   |                          |                  |             |                          |              |   |                          |              |                   |                          |                        |   |                          |              |     |                            |                |
| 589 | <b>hm_new</b><br><b>Show the field ONLY if:</b><br><b>[last_hm_mx] = '1'</b>                   | <b>Most recent hydromorphone use documented</b><br><i>Enter numerical value.</i>                                                                    | <b>text, Required</b>                                                                                                                                                                                                                                                                                                                                                                                                                                                                                                       |   |                          |                  |             |                          |              |   |                          |              |                   |                          |                        |   |                          |              |     |                            |                |

|                           |                                                                                       |                                                                                                                                    |                                                                                                                                                                                                                                                                                                                                                                                                     |                           |                        |                  |      |                 |       |   |                 |       |            |                 |                 |     |                   |         |
|---------------------------|---------------------------------------------------------------------------------------|------------------------------------------------------------------------------------------------------------------------------------|-----------------------------------------------------------------------------------------------------------------------------------------------------------------------------------------------------------------------------------------------------------------------------------------------------------------------------------------------------------------------------------------------------|---------------------------|------------------------|------------------|------|-----------------|-------|---|-----------------|-------|------------|-----------------|-----------------|-----|-------------------|---------|
| 590                       | <b>hm_avg</b><br><b>Show the field ONLY if:</b><br>[last_hm_mx] = '1'                 | <b>Average</b>                                                                                                                     | <b>calc, Required</b><br><b>Calculation:</b> mean([hm_old] , [hm_new])                                                                                                                                                                                                                                                                                                                              |                           |                        |                  |      |                 |       |   |                 |       |            |                 |                 |     |                   |         |
| 591                       | <b>last_hm_use</b><br><b>Show the field ONLY if:</b><br>[last_hm_mx] = '0'            | <b>Last hydromorphone use</b><br><i>Enter 999 if unknown. Use numerical value.</i>                                                 | <b>text, Required</b>                                                                                                                                                                                                                                                                                                                                                                               |                           |                        |                  |      |                 |       |   |                 |       |            |                 |                 |     |                   |         |
| 592                       | <b>last_hm_unit</b><br><b>Show the field ONLY if:</b><br>[last_opioid_type(5)] = '1'  | <b>Unit of time</b>                                                                                                                | <b>radio, Required</b> <table border="1"> <tr><td>1</td><td>Hours</td></tr> <tr><td>2</td><td>Days</td></tr> <tr><td>3</td><td>Weeks</td></tr> <tr><td>4</td><td>Months</td></tr> <tr><td>5</td><td>Years</td></tr> <tr><td>999</td><td>Unknown/Unclear</td></tr> </table>                                                                                                                          | 1                         | Hours                  | 2                | Days | 3               | Weeks | 4 | Months          | 5     | Years      | 999             | Unknown/Unclear |     |                   |         |
| 1                         | Hours                                                                                 |                                                                                                                                    |                                                                                                                                                                                                                                                                                                                                                                                                     |                           |                        |                  |      |                 |       |   |                 |       |            |                 |                 |     |                   |         |
| 2                         | Days                                                                                  |                                                                                                                                    |                                                                                                                                                                                                                                                                                                                                                                                                     |                           |                        |                  |      |                 |       |   |                 |       |            |                 |                 |     |                   |         |
| 3                         | Weeks                                                                                 |                                                                                                                                    |                                                                                                                                                                                                                                                                                                                                                                                                     |                           |                        |                  |      |                 |       |   |                 |       |            |                 |                 |     |                   |         |
| 4                         | Months                                                                                |                                                                                                                                    |                                                                                                                                                                                                                                                                                                                                                                                                     |                           |                        |                  |      |                 |       |   |                 |       |            |                 |                 |     |                   |         |
| 5                         | Years                                                                                 |                                                                                                                                    |                                                                                                                                                                                                                                                                                                                                                                                                     |                           |                        |                  |      |                 |       |   |                 |       |            |                 |                 |     |                   |         |
| 999                       | Unknown/Unclear                                                                       |                                                                                                                                    |                                                                                                                                                                                                                                                                                                                                                                                                     |                           |                        |                  |      |                 |       |   |                 |       |            |                 |                 |     |                   |         |
| 593                       | <b>last_hm_amt</b><br><b>Show the field ONLY if:</b><br>[last_opioid_type(5)] = '1'   | <b>Is the amount of last illicit hydromorphone use documented?</b>                                                                 | <b>yesno, Required</b> <table border="1"> <tr><td>1</td><td>Yes</td></tr> <tr><td>0</td><td>No</td></tr> </table>                                                                                                                                                                                                                                                                                   | 1                         | Yes                    | 0                | No   |                 |       |   |                 |       |            |                 |                 |     |                   |         |
| 1                         | Yes                                                                                   |                                                                                                                                    |                                                                                                                                                                                                                                                                                                                                                                                                     |                           |                        |                  |      |                 |       |   |                 |       |            |                 |                 |     |                   |         |
| 0                         | No                                                                                    |                                                                                                                                    |                                                                                                                                                                                                                                                                                                                                                                                                     |                           |                        |                  |      |                 |       |   |                 |       |            |                 |                 |     |                   |         |
| 594                       | <b>last_hm_amt_type</b><br><b>Show the field ONLY if:</b><br>[last_hm_amt] = '1'      | <b>Amount type</b>                                                                                                                 | <b>radio, Required</b> <table border="1"> <tr><td>1</td><td>grams</td></tr> <tr><td>2</td><td>\$</td></tr> <tr><td>3</td><td>bags</td></tr> <tr><td>4</td><td>pills</td></tr> <tr><td>5</td><td>milligrams</td></tr> <tr><td>6</td><td>micrograms</td></tr> </table>                                                                                                                                | 1                         | grams                  | 2                | \$   | 3               | bags  | 4 | pills           | 5     | milligrams | 6               | micrograms      |     |                   |         |
| 1                         | grams                                                                                 |                                                                                                                                    |                                                                                                                                                                                                                                                                                                                                                                                                     |                           |                        |                  |      |                 |       |   |                 |       |            |                 |                 |     |                   |         |
| 2                         | \$                                                                                    |                                                                                                                                    |                                                                                                                                                                                                                                                                                                                                                                                                     |                           |                        |                  |      |                 |       |   |                 |       |            |                 |                 |     |                   |         |
| 3                         | bags                                                                                  |                                                                                                                                    |                                                                                                                                                                                                                                                                                                                                                                                                     |                           |                        |                  |      |                 |       |   |                 |       |            |                 |                 |     |                   |         |
| 4                         | pills                                                                                 |                                                                                                                                    |                                                                                                                                                                                                                                                                                                                                                                                                     |                           |                        |                  |      |                 |       |   |                 |       |            |                 |                 |     |                   |         |
| 5                         | milligrams                                                                            |                                                                                                                                    |                                                                                                                                                                                                                                                                                                                                                                                                     |                           |                        |                  |      |                 |       |   |                 |       |            |                 |                 |     |                   |         |
| 6                         | micrograms                                                                            |                                                                                                                                    |                                                                                                                                                                                                                                                                                                                                                                                                     |                           |                        |                  |      |                 |       |   |                 |       |            |                 |                 |     |                   |         |
| 595                       | <b>last_hm_amt_spec</b><br><b>Show the field ONLY if:</b><br>[last_hm_amt] = '1'      | <b>Please specify amount used</b><br><i>Enter numerical value. E.g., if "2 grams," enter "2." Enter "999" if unknown.</i>          | <b>text, Required</b>                                                                                                                                                                                                                                                                                                                                                                               |                           |                        |                  |      |                 |       |   |                 |       |            |                 |                 |     |                   |         |
| 596                       | <b>last_hm_route</b><br><b>Show the field ONLY if:</b><br>[last_opioid_type(5)] = '1' | <b>Route of Administration</b>                                                                                                     | <table border="1"> <tr> <td><b>checkbox, Required</b></td> <td><b>last_hm_route_1</b></td> <td><b>Injection</b></td> </tr> <tr> <td>2</td> <td>last_hm_route_2</td> <td>Snort</td> </tr> <tr> <td>3</td> <td>last_hm_route_3</td> <td>Smoke</td> </tr> <tr> <td>4</td> <td>last_hm_route_4</td> <td>Swallow</td> </tr> <tr> <td>999</td> <td>last_hm_route_999</td> <td>Unknown</td> </tr> </table> | <b>checkbox, Required</b> | <b>last_hm_route_1</b> | <b>Injection</b> | 2    | last_hm_route_2 | Snort | 3 | last_hm_route_3 | Smoke | 4          | last_hm_route_4 | Swallow         | 999 | last_hm_route_999 | Unknown |
| <b>checkbox, Required</b> | <b>last_hm_route_1</b>                                                                | <b>Injection</b>                                                                                                                   |                                                                                                                                                                                                                                                                                                                                                                                                     |                           |                        |                  |      |                 |       |   |                 |       |            |                 |                 |     |                   |         |
| 2                         | last_hm_route_2                                                                       | Snort                                                                                                                              |                                                                                                                                                                                                                                                                                                                                                                                                     |                           |                        |                  |      |                 |       |   |                 |       |            |                 |                 |     |                   |         |
| 3                         | last_hm_route_3                                                                       | Smoke                                                                                                                              |                                                                                                                                                                                                                                                                                                                                                                                                     |                           |                        |                  |      |                 |       |   |                 |       |            |                 |                 |     |                   |         |
| 4                         | last_hm_route_4                                                                       | Swallow                                                                                                                            |                                                                                                                                                                                                                                                                                                                                                                                                     |                           |                        |                  |      |                 |       |   |                 |       |            |                 |                 |     |                   |         |
| 999                       | last_hm_route_999                                                                     | Unknown                                                                                                                            |                                                                                                                                                                                                                                                                                                                                                                                                     |                           |                        |                  |      |                 |       |   |                 |       |            |                 |                 |     |                   |         |
| 597                       | <b>last_mor_mx</b><br><b>Show the field ONLY if:</b><br>[last_opioid_type(6)] = '1'   | <b>Section Header:</b> Last Morphine Use<br><b>Are there discrepant values documented for when the patient last used morphine?</b> | <b>yesno, Required</b> <table border="1"> <tr><td>1</td><td>Yes</td></tr> <tr><td>0</td><td>No</td></tr> </table>                                                                                                                                                                                                                                                                                   | 1                         | Yes                    | 0                | No   |                 |       |   |                 |       |            |                 |                 |     |                   |         |
| 1                         | Yes                                                                                   |                                                                                                                                    |                                                                                                                                                                                                                                                                                                                                                                                                     |                           |                        |                  |      |                 |       |   |                 |       |            |                 |                 |     |                   |         |
| 0                         | No                                                                                    |                                                                                                                                    |                                                                                                                                                                                                                                                                                                                                                                                                     |                           |                        |                  |      |                 |       |   |                 |       |            |                 |                 |     |                   |         |
| 598                       | <b>mor_old</b><br><b>Show the field ONLY if:</b><br>[last_mor_mx] = '1'               | <b>Oldest morphine use documented</b><br><i>Enter numerical value.</i>                                                             | <b>text, Required</b>                                                                                                                                                                                                                                                                                                                                                                               |                           |                        |                  |      |                 |       |   |                 |       |            |                 |                 |     |                   |         |
| 599                       | <b>mor_new</b><br><b>Show the field ONLY if:</b><br>[last_mor_mx] = '1'               | <b>Most recent morphine use documented</b><br><i>Enter numerical value.</i>                                                        | <b>text, Required</b>                                                                                                                                                                                                                                                                                                                                                                               |                           |                        |                  |      |                 |       |   |                 |       |            |                 |                 |     |                   |         |

|     |                                                                                  |                                                                                                                           |                                                                                                                                                                                                                                                                                                                                                                             |   |                  |           |      |                  |       |   |                  |       |            |                  |                 |     |                    |         |
|-----|----------------------------------------------------------------------------------|---------------------------------------------------------------------------------------------------------------------------|-----------------------------------------------------------------------------------------------------------------------------------------------------------------------------------------------------------------------------------------------------------------------------------------------------------------------------------------------------------------------------|---|------------------|-----------|------|------------------|-------|---|------------------|-------|------------|------------------|-----------------|-----|--------------------|---------|
| 600 | <b>mor_avg</b><br>Show the field ONLY if:<br>[last_mor_mx] = '1'                 | <b>Average</b>                                                                                                            | <b>calc, Required</b><br>Calculation: mean([mor_old] , [mor_new])                                                                                                                                                                                                                                                                                                           |   |                  |           |      |                  |       |   |                  |       |            |                  |                 |     |                    |         |
| 601 | <b>last_mor_use</b><br>Show the field ONLY if:<br>[last_mor_mx] = '0'            | <b>Last morphine use</b><br><i>Enter 999 if unknown. Use numerical value.</i>                                             | <b>text, Required</b>                                                                                                                                                                                                                                                                                                                                                       |   |                  |           |      |                  |       |   |                  |       |            |                  |                 |     |                    |         |
| 602 | <b>last_mor_unit</b><br>Show the field ONLY if:<br>[last_opioid_type(6)] = '1'   | <b>Unit of time</b>                                                                                                       | <b>radio, Required</b><br><table border="1"> <tr><td>1</td><td>Hours</td></tr> <tr><td>2</td><td>Days</td></tr> <tr><td>3</td><td>Weeks</td></tr> <tr><td>4</td><td>Months</td></tr> <tr><td>5</td><td>Years</td></tr> <tr><td>999</td><td>Unknown/Unclear</td></tr> </table>                                                                                               | 1 | Hours            | 2         | Days | 3                | Weeks | 4 | Months           | 5     | Years      | 999              | Unknown/Unclear |     |                    |         |
| 1   | Hours                                                                            |                                                                                                                           |                                                                                                                                                                                                                                                                                                                                                                             |   |                  |           |      |                  |       |   |                  |       |            |                  |                 |     |                    |         |
| 2   | Days                                                                             |                                                                                                                           |                                                                                                                                                                                                                                                                                                                                                                             |   |                  |           |      |                  |       |   |                  |       |            |                  |                 |     |                    |         |
| 3   | Weeks                                                                            |                                                                                                                           |                                                                                                                                                                                                                                                                                                                                                                             |   |                  |           |      |                  |       |   |                  |       |            |                  |                 |     |                    |         |
| 4   | Months                                                                           |                                                                                                                           |                                                                                                                                                                                                                                                                                                                                                                             |   |                  |           |      |                  |       |   |                  |       |            |                  |                 |     |                    |         |
| 5   | Years                                                                            |                                                                                                                           |                                                                                                                                                                                                                                                                                                                                                                             |   |                  |           |      |                  |       |   |                  |       |            |                  |                 |     |                    |         |
| 999 | Unknown/Unclear                                                                  |                                                                                                                           |                                                                                                                                                                                                                                                                                                                                                                             |   |                  |           |      |                  |       |   |                  |       |            |                  |                 |     |                    |         |
| 603 | <b>last_mor_amt</b><br>Show the field ONLY if:<br>[last_opioid_type(6)] = '1'    | <b>Is the amount of last illicit morphine use documented?</b>                                                             | <b>yesno, Required</b><br><table border="1"> <tr><td>0</td><td>No</td></tr> </table>                                                                                                                                                                                                                                                                                        | 0 | No               |           |      |                  |       |   |                  |       |            |                  |                 |     |                    |         |
| 0   | No                                                                               |                                                                                                                           |                                                                                                                                                                                                                                                                                                                                                                             |   |                  |           |      |                  |       |   |                  |       |            |                  |                 |     |                    |         |
| 604 | <b>last_mor_amt_type</b><br>Show the field ONLY if:<br>[last_mor_amt] = '1'      | <b>Amount type</b>                                                                                                        | <b>radio, Required</b><br><table border="1"> <tr><td>1</td><td>grams</td></tr> <tr><td>2</td><td>\$</td></tr> <tr><td>3</td><td>bags</td></tr> <tr><td>4</td><td>pills</td></tr> <tr><td>5</td><td>milligrams</td></tr> <tr><td>6</td><td>micrograms</td></tr> </table>                                                                                                     | 1 | grams            | 2         | \$   | 3                | bags  | 4 | pills            | 5     | milligrams | 6                | micrograms      |     |                    |         |
| 1   | grams                                                                            |                                                                                                                           |                                                                                                                                                                                                                                                                                                                                                                             |   |                  |           |      |                  |       |   |                  |       |            |                  |                 |     |                    |         |
| 2   | \$                                                                               |                                                                                                                           |                                                                                                                                                                                                                                                                                                                                                                             |   |                  |           |      |                  |       |   |                  |       |            |                  |                 |     |                    |         |
| 3   | bags                                                                             |                                                                                                                           |                                                                                                                                                                                                                                                                                                                                                                             |   |                  |           |      |                  |       |   |                  |       |            |                  |                 |     |                    |         |
| 4   | pills                                                                            |                                                                                                                           |                                                                                                                                                                                                                                                                                                                                                                             |   |                  |           |      |                  |       |   |                  |       |            |                  |                 |     |                    |         |
| 5   | milligrams                                                                       |                                                                                                                           |                                                                                                                                                                                                                                                                                                                                                                             |   |                  |           |      |                  |       |   |                  |       |            |                  |                 |     |                    |         |
| 6   | micrograms                                                                       |                                                                                                                           |                                                                                                                                                                                                                                                                                                                                                                             |   |                  |           |      |                  |       |   |                  |       |            |                  |                 |     |                    |         |
| 605 | <b>last_mor_amt_spec</b><br>Show the field ONLY if:<br>[last_mor_amt] = '1'      | <b>Please specify amount used</b><br><i>Enter numerical value. E.g., if "2 grams," enter "2." Enter "999" if unknown.</i> | <b>text, Required</b>                                                                                                                                                                                                                                                                                                                                                       |   |                  |           |      |                  |       |   |                  |       |            |                  |                 |     |                    |         |
| 606 | <b>last_mor_route</b><br>Show the field ONLY if:<br>[last_opioid_type(6)] = '1'  | <b>Route of Administration</b>                                                                                            | <b>checkbox, Required</b><br><table border="1"> <tr><td>1</td><td>last_mor_route_1</td><td>Injection</td></tr> <tr><td>2</td><td>last_mor_route_2</td><td>Snort</td></tr> <tr><td>3</td><td>last_mor_route_3</td><td>Smoke</td></tr> <tr><td>4</td><td>last_mor_route_4</td><td>Swallow</td></tr> <tr><td>999</td><td>last_mor_route_999</td><td>Unknown</td></tr> </table> | 1 | last_mor_route_1 | Injection | 2    | last_mor_route_2 | Snort | 3 | last_mor_route_3 | Smoke | 4          | last_mor_route_4 | Swallow         | 999 | last_mor_route_999 | Unknown |
| 1   | last_mor_route_1                                                                 | Injection                                                                                                                 |                                                                                                                                                                                                                                                                                                                                                                             |   |                  |           |      |                  |       |   |                  |       |            |                  |                 |     |                    |         |
| 2   | last_mor_route_2                                                                 | Snort                                                                                                                     |                                                                                                                                                                                                                                                                                                                                                                             |   |                  |           |      |                  |       |   |                  |       |            |                  |                 |     |                    |         |
| 3   | last_mor_route_3                                                                 | Smoke                                                                                                                     |                                                                                                                                                                                                                                                                                                                                                                             |   |                  |           |      |                  |       |   |                  |       |            |                  |                 |     |                    |         |
| 4   | last_mor_route_4                                                                 | Swallow                                                                                                                   |                                                                                                                                                                                                                                                                                                                                                                             |   |                  |           |      |                  |       |   |                  |       |            |                  |                 |     |                    |         |
| 999 | last_mor_route_999                                                               | Unknown                                                                                                                   |                                                                                                                                                                                                                                                                                                                                                                             |   |                  |           |      |                  |       |   |                  |       |            |                  |                 |     |                    |         |
| 607 | <b>last_opioid_oth</b><br>Show the field ONLY if:<br>[last_opioid_type(7)] = '1' | <b>Section Header: Last [last_opioid_oth] Use</b><br>If "Other" opioid was selected, please specify.                      | <b>text, Required</b>                                                                                                                                                                                                                                                                                                                                                       |   |                  |           |      |                  |       |   |                  |       |            |                  |                 |     |                    |         |
| 608 | <b>last_oth_mx</b><br>Show the field ONLY if:<br>[last_opioid_type(7)] = '1'     | <b>Are there discrepant values documented for when the patient last used [last_opioid_oth]?</b>                           | <b>yesno, Required</b><br><table border="1"> <tr><td>1</td><td>Yes</td></tr> <tr><td>0</td><td>No</td></tr> </table>                                                                                                                                                                                                                                                        | 1 | Yes              | 0         | No   |                  |       |   |                  |       |            |                  |                 |     |                    |         |
| 1   | Yes                                                                              |                                                                                                                           |                                                                                                                                                                                                                                                                                                                                                                             |   |                  |           |      |                  |       |   |                  |       |            |                  |                 |     |                    |         |
| 0   | No                                                                               |                                                                                                                           |                                                                                                                                                                                                                                                                                                                                                                             |   |                  |           |      |                  |       |   |                  |       |            |                  |                 |     |                    |         |



|     |                                                                          |                                                                                                                                         |                                                                                                                                                                                                                                                                        |   |       |   |      |   |       |   |        |   |            |     |                 |
|-----|--------------------------------------------------------------------------|-----------------------------------------------------------------------------------------------------------------------------------------|------------------------------------------------------------------------------------------------------------------------------------------------------------------------------------------------------------------------------------------------------------------------|---|-------|---|------|---|-------|---|--------|---|------------|-----|-----------------|
| 609 | oth_old<br>Show the field ONLY if:<br>[last_oth_mx] = '1'                | <b>Oldest use documented</b><br><i>Enter numerical value.</i>                                                                           | text, Required                                                                                                                                                                                                                                                         |   |       |   |      |   |       |   |        |   |            |     |                 |
| 610 | oth_new<br>Show the field ONLY if:<br>[last_oth_mx] = '1'                | <b>Most recent use documented</b><br><i>Enter numerical value.</i>                                                                      | text, Required                                                                                                                                                                                                                                                         |   |       |   |      |   |       |   |        |   |            |     |                 |
| 611 | oth_avg<br>Show the field ONLY if:<br>[last_oth_mx] = '1'                | <b>Average</b>                                                                                                                          | calc, Required<br>Calculation: mean([oth_old] , [oth_new])                                                                                                                                                                                                             |   |       |   |      |   |       |   |        |   |            |     |                 |
| 612 | last_oth_use<br>Show the field ONLY if:<br>[last_oth_mx] = '0'           | <b>Last use</b><br><i>Enter 999 if unknown. Use numerical value.</i>                                                                    | text, Required                                                                                                                                                                                                                                                         |   |       |   |      |   |       |   |        |   |            |     |                 |
| 613 | last_oth_unit<br>Show the field ONLY if:<br>[last_opioid_type(7)] = '1'  | <b>Unit of time</b>                                                                                                                     | radio, Required<br><table border="1"> <tr><td>1</td><td>Hours</td></tr> <tr><td>2</td><td>Days</td></tr> <tr><td>3</td><td>Weeks</td></tr> <tr><td>4</td><td>Months</td></tr> <tr><td>5</td><td>Years</td></tr> <tr><td>999</td><td>Unknown/Unclear</td></tr> </table> | 1 | Hours | 2 | Days | 3 | Weeks | 4 | Months | 5 | Years      | 999 | Unknown/Unclear |
| 1   | Hours                                                                    |                                                                                                                                         |                                                                                                                                                                                                                                                                        |   |       |   |      |   |       |   |        |   |            |     |                 |
| 2   | Days                                                                     |                                                                                                                                         |                                                                                                                                                                                                                                                                        |   |       |   |      |   |       |   |        |   |            |     |                 |
| 3   | Weeks                                                                    |                                                                                                                                         |                                                                                                                                                                                                                                                                        |   |       |   |      |   |       |   |        |   |            |     |                 |
| 4   | Months                                                                   |                                                                                                                                         |                                                                                                                                                                                                                                                                        |   |       |   |      |   |       |   |        |   |            |     |                 |
| 5   | Years                                                                    |                                                                                                                                         |                                                                                                                                                                                                                                                                        |   |       |   |      |   |       |   |        |   |            |     |                 |
| 999 | Unknown/Unclear                                                          |                                                                                                                                         |                                                                                                                                                                                                                                                                        |   |       |   |      |   |       |   |        |   |            |     |                 |
| 614 | last_oth_amt<br>Show the field ONLY if:<br>[last_opioid_type(7)] = '1'   | <b>Is the amount of last illicit use documented for [last_opioid_oth]?</b>                                                              | yesno, Required<br><table border="1"> <tr><td>1</td><td>Yes</td></tr> <tr><td>0</td><td>No</td></tr> </table>                                                                                                                                                          | 1 | Yes   | 0 | No   |   |       |   |        |   |            |     |                 |
| 1   | Yes                                                                      |                                                                                                                                         |                                                                                                                                                                                                                                                                        |   |       |   |      |   |       |   |        |   |            |     |                 |
| 0   | No                                                                       |                                                                                                                                         |                                                                                                                                                                                                                                                                        |   |       |   |      |   |       |   |        |   |            |     |                 |
| 615 | last_oth_amt_type<br>Show the field ONLY if:<br>[last_oth_amt] = '1'     | <b>Amount type</b>                                                                                                                      | radio, Required<br><table border="1"> <tr><td>1</td><td>grams</td></tr> <tr><td>2</td><td>\$</td></tr> <tr><td>3</td><td>bags</td></tr> <tr><td>4</td><td>pills</td></tr> <tr><td>5</td><td>milligrams</td></tr> <tr><td>6</td><td>micrograms</td></tr> </table>       | 1 | grams | 2 | \$   | 3 | bags  | 4 | pills  | 5 | milligrams | 6   | micrograms      |
| 1   | grams                                                                    |                                                                                                                                         |                                                                                                                                                                                                                                                                        |   |       |   |      |   |       |   |        |   |            |     |                 |
| 2   | \$                                                                       |                                                                                                                                         |                                                                                                                                                                                                                                                                        |   |       |   |      |   |       |   |        |   |            |     |                 |
| 3   | bags                                                                     |                                                                                                                                         |                                                                                                                                                                                                                                                                        |   |       |   |      |   |       |   |        |   |            |     |                 |
| 4   | pills                                                                    |                                                                                                                                         |                                                                                                                                                                                                                                                                        |   |       |   |      |   |       |   |        |   |            |     |                 |
| 5   | milligrams                                                               |                                                                                                                                         |                                                                                                                                                                                                                                                                        |   |       |   |      |   |       |   |        |   |            |     |                 |
| 6   | micrograms                                                               |                                                                                                                                         |                                                                                                                                                                                                                                                                        |   |       |   |      |   |       |   |        |   |            |     |                 |
| 616 | last_oth_amt_spec<br>Show the field ONLY if:<br>[last_oth_amt] = '1'     | <b>Please specify amount used</b><br><i>Enter numerical value. E.g., if "2 grams," enter "2." Enter "999" if unknown.</i>               | text, Required                                                                                                                                                                                                                                                         |   |       |   |      |   |       |   |        |   |            |     |                 |
| 617 | last_oth_route<br>Show the field ONLY if:<br>[last_opioid_type(7)] = '1' | <b>Route of Administration</b>                                                                                                          | checkbox, Required                                                                                                                                                                                                                                                     |   |       |   |      |   |       |   |        |   |            |     |                 |
| 618 | last_unk_mx<br>Show the field ONLY if:<br>[last_opioid_type(999)] = '1'  | <b>Section Header: Last Unspecified Opioid Use</b><br><b>Are there discrepant values documented for when the patient last used this</b> | unknown/unspecified opioid?                                                                                                                                                                                                                                            |   |       |   |      |   |       |   |        |   |            |     |                 |

|     |                    |         |
|-----|--------------------|---------|
| 4   | last_oth_route_4   | Swallow |
| 999 | last_oth_route_999 | Unknown |

**yesno, Required**

|   |     |
|---|-----|
| 1 | Yes |
| 0 | No  |

|     |                                                                           |                                                                                                                                                                                   |                                                                                                                                                                                                                                                                                                                                                     |   |            |         |      |            |                                            |     |             |                  |       |            |                 |   |            |       |
|-----|---------------------------------------------------------------------------|-----------------------------------------------------------------------------------------------------------------------------------------------------------------------------------|-----------------------------------------------------------------------------------------------------------------------------------------------------------------------------------------------------------------------------------------------------------------------------------------------------------------------------------------------------|---|------------|---------|------|------------|--------------------------------------------|-----|-------------|------------------|-------|------------|-----------------|---|------------|-------|
| 619 | unk_old<br>Show the field ONLY if:<br>[last_unk_mx] = '1'                 | <b>Oldest use documented</b><br><i>Enter numerical value.</i>                                                                                                                     | text, Required                                                                                                                                                                                                                                                                                                                                      |   |            |         |      |            |                                            |     |             |                  |       |            |                 |   |            |       |
| 620 | unk_new<br>Show the field ONLY if:<br>[last_unk_mx] = '1'                 | <b>Most recent use documented</b><br><i>Enter numerical value.</i>                                                                                                                | text, Required                                                                                                                                                                                                                                                                                                                                      |   |            |         |      |            |                                            |     |             |                  |       |            |                 |   |            |       |
| 621 | unk_avg<br>Show the field ONLY if:<br>[last_unk_mx] = '1'                 | <b>Average</b>                                                                                                                                                                    | calc, Required<br>Calculation: mean([unk_old] , [unk_new])                                                                                                                                                                                                                                                                                          |   |            |         |      |            |                                            |     |             |                  |       |            |                 |   |            |       |
| 622 | last_unk_use<br>Show the field ONLY if:<br>[last_unk_mx] = '0'            | <b>Last use</b><br><i>Enter 999 if unknown. Use numerical value.</i>                                                                                                              | text, Required                                                                                                                                                                                                                                                                                                                                      |   |            |         |      |            |                                            |     |             |                  |       |            |                 |   |            |       |
| 623 | last_unk_unit<br>Show the field ONLY if:<br>[last_opioid_type(999)] = '1' | <b>Unit of time</b>                                                                                                                                                               | radio, Required<br><table border="1"> <tr><td>1</td><td>Hours</td></tr> <tr><td>2</td><td>Days</td></tr> <tr><td>3</td><td>Weeks</td></tr> <tr><td>4</td><td>Months</td></tr> <tr><td>5</td><td>Years</td></tr> <tr><td>999</td><td>Unknown/Unclear</td></tr> </table>                                                                              | 1 | Hours      | 2       | Days | 3          | Weeks                                      | 4   | Months      | 5                | Years | 999        | Unknown/Unclear |   |            |       |
| 1   | Hours                                                                     |                                                                                                                                                                                   |                                                                                                                                                                                                                                                                                                                                                     |   |            |         |      |            |                                            |     |             |                  |       |            |                 |   |            |       |
| 2   | Days                                                                      |                                                                                                                                                                                   |                                                                                                                                                                                                                                                                                                                                                     |   |            |         |      |            |                                            |     |             |                  |       |            |                 |   |            |       |
| 3   | Weeks                                                                     |                                                                                                                                                                                   |                                                                                                                                                                                                                                                                                                                                                     |   |            |         |      |            |                                            |     |             |                  |       |            |                 |   |            |       |
| 4   | Months                                                                    |                                                                                                                                                                                   |                                                                                                                                                                                                                                                                                                                                                     |   |            |         |      |            |                                            |     |             |                  |       |            |                 |   |            |       |
| 5   | Years                                                                     |                                                                                                                                                                                   |                                                                                                                                                                                                                                                                                                                                                     |   |            |         |      |            |                                            |     |             |                  |       |            |                 |   |            |       |
| 999 | Unknown/Unclear                                                           |                                                                                                                                                                                   |                                                                                                                                                                                                                                                                                                                                                     |   |            |         |      |            |                                            |     |             |                  |       |            |                 |   |            |       |
| 624 | od                                                                        | <b>Section Header:</b> <i>Overdose</i><br><b>Any mention of substance overdose in this chart? ****</b><br><i>Includes non-opioid substances (e.g., stimulants, alcohol, etc.)</i> | radio, Required<br><table border="1"> <tr><td>1</td><td>Yes</td></tr> <tr><td>0</td><td>No</td></tr> </table>                                                                                                                                                                                                                                       | 1 | Yes        | 0       | No   |            |                                            |     |             |                  |       |            |                 |   |            |       |
| 1   | Yes                                                                       |                                                                                                                                                                                   |                                                                                                                                                                                                                                                                                                                                                     |   |            |         |      |            |                                            |     |             |                  |       |            |                 |   |            |       |
| 0   | No                                                                        |                                                                                                                                                                                   |                                                                                                                                                                                                                                                                                                                                                     |   |            |         |      |            |                                            |     |             |                  |       |            |                 |   |            |       |
| 625 | od_spec<br>Show the field ONLY if:<br>[od] = '1'                          | <b>Please specify the overdose:</b>                                                                                                                                               | checkbox, Required<br><table border="1"> <tr><td>1</td><td>od_spec_1</td><td>Opioid</td></tr> <tr><td>2</td><td>od_spec_2</td><td>Intoxication/overdose from other substance</td></tr> <tr><td>999</td><td>od_spec_999</td><td>Unknown</td></tr> </table>                                                                                           | 1 | od_spec_1  | Opioid  | 2    | od_spec_2  | Intoxication/overdose from other substance | 999 | od_spec_999 | Unknown          |       |            |                 |   |            |       |
| 1   | od_spec_1                                                                 | Opioid                                                                                                                                                                            |                                                                                                                                                                                                                                                                                                                                                     |   |            |         |      |            |                                            |     |             |                  |       |            |                 |   |            |       |
| 2   | od_spec_2                                                                 | Intoxication/overdose from other substance                                                                                                                                        |                                                                                                                                                                                                                                                                                                                                                     |   |            |         |      |            |                                            |     |             |                  |       |            |                 |   |            |       |
| 999 | od_spec_999                                                               | Unknown                                                                                                                                                                           |                                                                                                                                                                                                                                                                                                                                                     |   |            |         |      |            |                                            |     |             |                  |       |            |                 |   |            |       |
| 626 | od_intox<br>Show the field ONLY if:<br>[od_spec(2)] = '1'                 | <b>Which of the following substances were mentioned in the overdose documentation (check all that apply):</b>                                                                     | checkbox, Required<br><table border="1"> <tr><td>1</td><td>od_intox_1</td><td>Alcohol</td></tr> <tr><td>2</td><td>od_intox_2</td><td>Benzodiazepines</td></tr> <tr><td>3</td><td>od_intox_3</td><td>Methamphetamines</td></tr> <tr><td>4</td><td>od_intox_4</td><td>Cocaine</td></tr> <tr><td>5</td><td>od_intox_5</td><td>Other</td></tr> </table> | 1 | od_intox_1 | Alcohol | 2    | od_intox_2 | Benzodiazepines                            | 3   | od_intox_3  | Methamphetamines | 4     | od_intox_4 | Cocaine         | 5 | od_intox_5 | Other |
| 1   | od_intox_1                                                                | Alcohol                                                                                                                                                                           |                                                                                                                                                                                                                                                                                                                                                     |   |            |         |      |            |                                            |     |             |                  |       |            |                 |   |            |       |
| 2   | od_intox_2                                                                | Benzodiazepines                                                                                                                                                                   |                                                                                                                                                                                                                                                                                                                                                     |   |            |         |      |            |                                            |     |             |                  |       |            |                 |   |            |       |
| 3   | od_intox_3                                                                | Methamphetamines                                                                                                                                                                  |                                                                                                                                                                                                                                                                                                                                                     |   |            |         |      |            |                                            |     |             |                  |       |            |                 |   |            |       |
| 4   | od_intox_4                                                                | Cocaine                                                                                                                                                                           |                                                                                                                                                                                                                                                                                                                                                     |   |            |         |      |            |                                            |     |             |                  |       |            |                 |   |            |       |
| 5   | od_intox_5                                                                | Other                                                                                                                                                                             |                                                                                                                                                                                                                                                                                                                                                     |   |            |         |      |            |                                            |     |             |                  |       |            |                 |   |            |       |
| 627 | od_oth<br>Show the field ONLY if:<br>[od_intox(5)] = '1'                  | <b>If "Other," please specify.</b>                                                                                                                                                | text, Required                                                                                                                                                                                                                                                                                                                                      |   |            |         |      |            |                                            |     |             |                  |       |            |                 |   |            |       |
| 628 | mat_notes                                                                 | <b>Section Header:</b> <i>MAT Notes</i><br><b>Wellsoft notes by MAT coordinator (Christian Hailozian), if any.</b><br><i>Copy and paste from Other Notes.</i>                     | notes                                                                                                                                                                                                                                                                                                                                               |   |            |         |      |            |                                            |     |             |                  |       |            |                 |   |            |       |

|     |                                                                                                     |                                                                                                                    |                                                                                                                                                                                                                                                                                                                                                                                                                |   |                        |                    |               |               |         |     |                 |                 |    |   |    |   |    |   |    |   |       |     |         |
|-----|-----------------------------------------------------------------------------------------------------|--------------------------------------------------------------------------------------------------------------------|----------------------------------------------------------------------------------------------------------------------------------------------------------------------------------------------------------------------------------------------------------------------------------------------------------------------------------------------------------------------------------------------------------------|---|------------------------|--------------------|---------------|---------------|---------|-----|-----------------|-----------------|----|---|----|---|----|---|----|---|-------|-----|---------|
| 629 | previous_bup                                                                                        | Section Header: <i>Buprenorphine Treatment History ****</i><br>Has the patient ever been exposed to buprenorphine? | radio, Required<br><table border="1"> <tr> <td>1</td> <td>Yes</td> </tr> <tr> <td>0</td> <td>No/Unclear</td> </tr> </table>                                                                                                                                                                                                                                                                                    | 1 | Yes                    | 0                  | No/Unclear    |               |         |     |                 |                 |    |   |    |   |    |   |    |   |       |     |         |
| 1   | Yes                                                                                                 |                                                                                                                    |                                                                                                                                                                                                                                                                                                                                                                                                                |   |                        |                    |               |               |         |     |                 |                 |    |   |    |   |    |   |    |   |       |     |         |
| 0   | No/Unclear                                                                                          |                                                                                                                    |                                                                                                                                                                                                                                                                                                                                                                                                                |   |                        |                    |               |               |         |     |                 |                 |    |   |    |   |    |   |    |   |       |     |         |
| 630 | bup_setting<br><br>Show the field ONLY if:<br>[previous_bup] = '1'                                  | Setting of exposure                                                                                                | checkbox, Required<br><table border="1"> <tr> <td>1</td> <td>bup_setting_1</td> <td>Healthcare setting</td> </tr> <tr> <td>2</td> <td>bup_setting_2</td> <td>Street</td> </tr> <tr> <td>999</td> <td>bup_setting_999</td> <td>Unknown/Unclear</td> </tr> </table>                                                                                                                                              | 1 | bup_setting_1          | Healthcare setting | 2             | bup_setting_2 | Street  | 999 | bup_setting_999 | Unknown/Unclear |    |   |    |   |    |   |    |   |       |     |         |
| 1   | bup_setting_1                                                                                       | Healthcare setting                                                                                                 |                                                                                                                                                                                                                                                                                                                                                                                                                |   |                        |                    |               |               |         |     |                 |                 |    |   |    |   |    |   |    |   |       |     |         |
| 2   | bup_setting_2                                                                                       | Street                                                                                                             |                                                                                                                                                                                                                                                                                                                                                                                                                |   |                        |                    |               |               |         |     |                 |                 |    |   |    |   |    |   |    |   |       |     |         |
| 999 | bup_setting_999                                                                                     | Unknown/Unclear                                                                                                    |                                                                                                                                                                                                                                                                                                                                                                                                                |   |                        |                    |               |               |         |     |                 |                 |    |   |    |   |    |   |    |   |       |     |         |
| 631 | bup_form<br><br>Show the field ONLY if:<br>[previous_bup] = '1'                                     | Formulation of most recent buprenorphine treatment (e.g., Suboxone, Subutex, etc.)                                 | radio, Required<br><table border="1"> <tr> <td>1</td> <td>Buprenorphine/Naloxone</td> </tr> <tr> <td>2</td> <td>Buprenorphine</td> </tr> <tr> <td>999</td> <td>Unknown</td> </tr> </table>                                                                                                                                                                                                                     | 1 | Buprenorphine/Naloxone | 2                  | Buprenorphine | 999           | Unknown |     |                 |                 |    |   |    |   |    |   |    |   |       |     |         |
| 1   | Buprenorphine/Naloxone                                                                              |                                                                                                                    |                                                                                                                                                                                                                                                                                                                                                                                                                |   |                        |                    |               |               |         |     |                 |                 |    |   |    |   |    |   |    |   |       |     |         |
| 2   | Buprenorphine                                                                                       |                                                                                                                    |                                                                                                                                                                                                                                                                                                                                                                                                                |   |                        |                    |               |               |         |     |                 |                 |    |   |    |   |    |   |    |   |       |     |         |
| 999 | Unknown                                                                                             |                                                                                                                    |                                                                                                                                                                                                                                                                                                                                                                                                                |   |                        |                    |               |               |         |     |                 |                 |    |   |    |   |    |   |    |   |       |     |         |
| 632 | prev_bup_amt<br><br>Show the field ONLY if:<br>[previous_bup] = '1'                                 | Amount/strength of buprenorphine treatment known?                                                                  | yesno, Required<br><table border="1"> <tr> <td>1</td> <td>Yes</td> </tr> <tr> <td>0</td> <td>No</td> </tr> </table>                                                                                                                                                                                                                                                                                            | 1 | Yes                    | 0                  | No            |               |         |     |                 |                 |    |   |    |   |    |   |    |   |       |     |         |
| 1   | Yes                                                                                                 |                                                                                                                    |                                                                                                                                                                                                                                                                                                                                                                                                                |   |                        |                    |               |               |         |     |                 |                 |    |   |    |   |    |   |    |   |       |     |         |
| 0   | No                                                                                                  |                                                                                                                    |                                                                                                                                                                                                                                                                                                                                                                                                                |   |                        |                    |               |               |         |     |                 |                 |    |   |    |   |    |   |    |   |       |     |         |
| 633 | prev_bup_freq<br><br>Show the field ONLY if:<br>[previous_bup] = '1'                                | Frequency of buprenorphine treatment known?                                                                        | yesno, Required<br><table border="1"> <tr> <td>1</td> <td>Yes</td> </tr> <tr> <td>0</td> <td>No</td> </tr> </table>                                                                                                                                                                                                                                                                                            | 1 | Yes                    | 0                  | No            |               |         |     |                 |                 |    |   |    |   |    |   |    |   |       |     |         |
| 1   | Yes                                                                                                 |                                                                                                                    |                                                                                                                                                                                                                                                                                                                                                                                                                |   |                        |                    |               |               |         |     |                 |                 |    |   |    |   |    |   |    |   |       |     |         |
| 0   | No                                                                                                  |                                                                                                                    |                                                                                                                                                                                                                                                                                                                                                                                                                |   |                        |                    |               |               |         |     |                 |                 |    |   |    |   |    |   |    |   |       |     |         |
| 634 | prev_bup_mg<br><br>Show the field ONLY if:<br>[prev_bup_amt] = '1' and<br>[prev_bup_freq] = '1'     | Strength of buprenorphine treatment (in mg)<br><i>E.g., if patient takes 8mg buprenorphine TID, enter "8."</i>     | text, Required                                                                                                                                                                                                                                                                                                                                                                                                 |   |                        |                    |               |               |         |     |                 |                 |    |   |    |   |    |   |    |   |       |     |         |
| 635 | prev_bup_mg_tot<br><br>Show the field ONLY if:<br>[prev_bup_amt] = '1' and<br>[prev_bup_freq] = '0' | Total amount of buprenorphine treatment (in mg)                                                                    | text, Required                                                                                                                                                                                                                                                                                                                                                                                                 |   |                        |                    |               |               |         |     |                 |                 |    |   |    |   |    |   |    |   |       |     |         |
| 636 | bup_tx_route<br><br>Show the field ONLY if:<br>[previous_bup] = '1'                                 | Route of most recent buprenorphine treatment                                                                       | radio, Required<br><table border="1"> <tr> <td>1</td> <td>SL</td> </tr> <tr> <td>2</td> <td>BUCC</td> </tr> <tr> <td>3</td> <td>TD</td> </tr> <tr> <td>4</td> <td>IJ</td> </tr> <tr> <td>5</td> <td>IV</td> </tr> <tr> <td>6</td> <td>IM</td> </tr> <tr> <td>7</td> <td>ID</td> </tr> <tr> <td>8</td> <td>SQ</td> </tr> <tr> <td>9</td> <td>Other</td> </tr> <tr> <td>999</td> <td>Unknown</td> </tr> </table> | 1 | SL                     | 2                  | BUCC          | 3             | TD      | 4   | IJ              | 5               | IV | 6 | IM | 7 | ID | 8 | SQ | 9 | Other | 999 | Unknown |
| 1   | SL                                                                                                  |                                                                                                                    |                                                                                                                                                                                                                                                                                                                                                                                                                |   |                        |                    |               |               |         |     |                 |                 |    |   |    |   |    |   |    |   |       |     |         |
| 2   | BUCC                                                                                                |                                                                                                                    |                                                                                                                                                                                                                                                                                                                                                                                                                |   |                        |                    |               |               |         |     |                 |                 |    |   |    |   |    |   |    |   |       |     |         |
| 3   | TD                                                                                                  |                                                                                                                    |                                                                                                                                                                                                                                                                                                                                                                                                                |   |                        |                    |               |               |         |     |                 |                 |    |   |    |   |    |   |    |   |       |     |         |
| 4   | IJ                                                                                                  |                                                                                                                    |                                                                                                                                                                                                                                                                                                                                                                                                                |   |                        |                    |               |               |         |     |                 |                 |    |   |    |   |    |   |    |   |       |     |         |
| 5   | IV                                                                                                  |                                                                                                                    |                                                                                                                                                                                                                                                                                                                                                                                                                |   |                        |                    |               |               |         |     |                 |                 |    |   |    |   |    |   |    |   |       |     |         |
| 6   | IM                                                                                                  |                                                                                                                    |                                                                                                                                                                                                                                                                                                                                                                                                                |   |                        |                    |               |               |         |     |                 |                 |    |   |    |   |    |   |    |   |       |     |         |
| 7   | ID                                                                                                  |                                                                                                                    |                                                                                                                                                                                                                                                                                                                                                                                                                |   |                        |                    |               |               |         |     |                 |                 |    |   |    |   |    |   |    |   |       |     |         |
| 8   | SQ                                                                                                  |                                                                                                                    |                                                                                                                                                                                                                                                                                                                                                                                                                |   |                        |                    |               |               |         |     |                 |                 |    |   |    |   |    |   |    |   |       |     |         |
| 9   | Other                                                                                               |                                                                                                                    |                                                                                                                                                                                                                                                                                                                                                                                                                |   |                        |                    |               |               |         |     |                 |                 |    |   |    |   |    |   |    |   |       |     |         |
| 999 | Unknown                                                                                             |                                                                                                                    |                                                                                                                                                                                                                                                                                                                                                                                                                |   |                        |                    |               |               |         |     |                 |                 |    |   |    |   |    |   |    |   |       |     |         |
| 637 | bup_tx_route_oth<br><br>Show the field ONLY if:<br>[bup_tx_route] = '9'                             | If "Other," please specify.                                                                                        | text, Required                                                                                                                                                                                                                                                                                                                                                                                                 |   |                        |                    |               |               |         |     |                 |                 |    |   |    |   |    |   |    |   |       |     |         |

|     |                                                                                      |                                                                                                                      |                                                                                                                                                                                                                                                                                                                                                                                                                                                                |   |      |   |               |   |        |   |       |     |         |   |    |   |     |   |     |   |       |    |     |    |       |
|-----|--------------------------------------------------------------------------------------|----------------------------------------------------------------------------------------------------------------------|----------------------------------------------------------------------------------------------------------------------------------------------------------------------------------------------------------------------------------------------------------------------------------------------------------------------------------------------------------------------------------------------------------------------------------------------------------------|---|------|---|---------------|---|--------|---|-------|-----|---------|---|----|---|-----|---|-----|---|-------|----|-----|----|-------|
| 638 | <b>bup_freq</b><br>Show the field ONLY if:<br><pre>[prev_bup_freq] = '1'</pre>       | <b>Frequency of most recent treatment</b>                                                                            | <b>radio, Required</b> <table border="1" data-bbox="1047 115 1282 640"> <tr><td>1</td><td>QD</td></tr> <tr><td>2</td><td>Everyotherday</td></tr> <tr><td>3</td><td>BID</td></tr> <tr><td>4</td><td>TID</td></tr> <tr><td>5</td><td>QID</td></tr> <tr><td>6</td><td>QH</td></tr> <tr><td>7</td><td>QHS</td></tr> <tr><td>8</td><td>Q4h</td></tr> <tr><td>9</td><td>Q4-6h</td></tr> <tr><td>10</td><td>QWK</td></tr> <tr><td>11</td><td>Other</td></tr> </table> | 1 | QD   | 2 | Everyotherday | 3 | BID    | 4 | TID   | 5   | QID     | 6 | QH | 7 | QHS | 8 | Q4h | 9 | Q4-6h | 10 | QWK | 11 | Other |
| 1   | QD                                                                                   |                                                                                                                      |                                                                                                                                                                                                                                                                                                                                                                                                                                                                |   |      |   |               |   |        |   |       |     |         |   |    |   |     |   |     |   |       |    |     |    |       |
| 2   | Everyotherday                                                                        |                                                                                                                      |                                                                                                                                                                                                                                                                                                                                                                                                                                                                |   |      |   |               |   |        |   |       |     |         |   |    |   |     |   |     |   |       |    |     |    |       |
| 3   | BID                                                                                  |                                                                                                                      |                                                                                                                                                                                                                                                                                                                                                                                                                                                                |   |      |   |               |   |        |   |       |     |         |   |    |   |     |   |     |   |       |    |     |    |       |
| 4   | TID                                                                                  |                                                                                                                      |                                                                                                                                                                                                                                                                                                                                                                                                                                                                |   |      |   |               |   |        |   |       |     |         |   |    |   |     |   |     |   |       |    |     |    |       |
| 5   | QID                                                                                  |                                                                                                                      |                                                                                                                                                                                                                                                                                                                                                                                                                                                                |   |      |   |               |   |        |   |       |     |         |   |    |   |     |   |     |   |       |    |     |    |       |
| 6   | QH                                                                                   |                                                                                                                      |                                                                                                                                                                                                                                                                                                                                                                                                                                                                |   |      |   |               |   |        |   |       |     |         |   |    |   |     |   |     |   |       |    |     |    |       |
| 7   | QHS                                                                                  |                                                                                                                      |                                                                                                                                                                                                                                                                                                                                                                                                                                                                |   |      |   |               |   |        |   |       |     |         |   |    |   |     |   |     |   |       |    |     |    |       |
| 8   | Q4h                                                                                  |                                                                                                                      |                                                                                                                                                                                                                                                                                                                                                                                                                                                                |   |      |   |               |   |        |   |       |     |         |   |    |   |     |   |     |   |       |    |     |    |       |
| 9   | Q4-6h                                                                                |                                                                                                                      |                                                                                                                                                                                                                                                                                                                                                                                                                                                                |   |      |   |               |   |        |   |       |     |         |   |    |   |     |   |     |   |       |    |     |    |       |
| 10  | QWK                                                                                  |                                                                                                                      |                                                                                                                                                                                                                                                                                                                                                                                                                                                                |   |      |   |               |   |        |   |       |     |         |   |    |   |     |   |     |   |       |    |     |    |       |
| 11  | Other                                                                                |                                                                                                                      |                                                                                                                                                                                                                                                                                                                                                                                                                                                                |   |      |   |               |   |        |   |       |     |         |   |    |   |     |   |     |   |       |    |     |    |       |
| 639 | <b>bup_tx_freq_oth</b><br>Show the field ONLY if:<br><pre>[bup_freq] = '11'</pre>    | <b>If "Other," please specify.</b>                                                                                   | <b>text, Required</b>                                                                                                                                                                                                                                                                                                                                                                                                                                          |   |      |   |               |   |        |   |       |     |         |   |    |   |     |   |     |   |       |    |     |    |       |
| 640 | <b>bup_length_doc</b><br>Show the field ONLY if:<br><pre>[previous_bup] = '1'</pre>  | <b>Is there documentation of how long the patient has been engaged in treatment with buprenorphine?</b>              | <b>yesno, Required</b> <table border="1" data-bbox="1047 829 1136 913"> <tr><td>1</td><td>Yes</td></tr> <tr><td>0</td><td>No</td></tr> </table>                                                                                                                                                                                                                                                                                                                | 1 | Yes  | 0 | No            |   |        |   |       |     |         |   |    |   |     |   |     |   |       |    |     |    |       |
| 1   | Yes                                                                                  |                                                                                                                      |                                                                                                                                                                                                                                                                                                                                                                                                                                                                |   |      |   |               |   |        |   |       |     |         |   |    |   |     |   |     |   |       |    |     |    |       |
| 0   | No                                                                                   |                                                                                                                      |                                                                                                                                                                                                                                                                                                                                                                                                                                                                |   |      |   |               |   |        |   |       |     |         |   |    |   |     |   |     |   |       |    |     |    |       |
| 641 | <b>bup_length_mx</b><br>Show the field ONLY if:<br><pre>[bup_length_doc] = '1'</pre> | <b>Are there discrepant accounts in the chart for the length of time that this patient was engaged in treatment?</b> | <b>yesno, Required</b> <table border="1" data-bbox="1047 976 1136 1060"> <tr><td>1</td><td>Yes</td></tr> <tr><td>0</td><td>No</td></tr> </table>                                                                                                                                                                                                                                                                                                               | 1 | Yes  | 0 | No            |   |        |   |       |     |         |   |    |   |     |   |     |   |       |    |     |    |       |
| 1   | Yes                                                                                  |                                                                                                                      |                                                                                                                                                                                                                                                                                                                                                                                                                                                                |   |      |   |               |   |        |   |       |     |         |   |    |   |     |   |     |   |       |    |     |    |       |
| 0   | No                                                                                   |                                                                                                                      |                                                                                                                                                                                                                                                                                                                                                                                                                                                                |   |      |   |               |   |        |   |       |     |         |   |    |   |     |   |     |   |       |    |     |    |       |
| 642 | <b>bup_length_max</b><br>Show the field ONLY if:<br><pre>[bup_length_mx] = '1'</pre> | <b>Greatest length of treatment documented</b><br><i>Enter numerical value. E.g., if "5 months," enter "5."</i>      | <b>text, Required</b>                                                                                                                                                                                                                                                                                                                                                                                                                                          |   |      |   |               |   |        |   |       |     |         |   |    |   |     |   |     |   |       |    |     |    |       |
| 643 | <b>bup_length_min</b><br>Show the field ONLY if:<br><pre>[bup_length_mx] = '1'</pre> | <b>Shortest length of treatment documented</b><br><i>Enter numerical value. E.g., if "5 months," enter "5."</i>      | <b>text, Required</b>                                                                                                                                                                                                                                                                                                                                                                                                                                          |   |      |   |               |   |        |   |       |     |         |   |    |   |     |   |     |   |       |    |     |    |       |
| 644 | <b>bup_length_avg</b><br>Show the field ONLY if:<br><pre>[bup_length_mx] = '1'</pre> | <b>Average length of treatment</b>                                                                                   | <b>calc, Required</b><br><b>Calculation: mean([bup_length_max] , [bup_length_min])</b>                                                                                                                                                                                                                                                                                                                                                                         |   |      |   |               |   |        |   |       |     |         |   |    |   |     |   |     |   |       |    |     |    |       |
| 645 | <b>bup_length</b><br>Show the field ONLY if:<br><pre>[bup_length_mx] = '0'</pre>     | <b>Length of time of most recent treatment engagement</b><br><i>If 5 years, enter "5." Enter "999" if unknown.</i>   | <b>text, Required</b>                                                                                                                                                                                                                                                                                                                                                                                                                                          |   |      |   |               |   |        |   |       |     |         |   |    |   |     |   |     |   |       |    |     |    |       |
| 646 | <b>bup_unit</b><br>Show the field ONLY if:<br><pre>[bup_length_doc] = '1'</pre>      | <b>Unit of time</b>                                                                                                  | <b>radio, Required</b> <table border="1" data-bbox="1047 1638 1234 1869"> <tr><td>1</td><td>Days</td></tr> <tr><td>2</td><td>Weeks</td></tr> <tr><td>3</td><td>Months</td></tr> <tr><td>4</td><td>Years</td></tr> <tr><td>999</td><td>Unknown</td></tr> </table>                                                                                                                                                                                               | 1 | Days | 2 | Weeks         | 3 | Months | 4 | Years | 999 | Unknown |   |    |   |     |   |     |   |       |    |     |    |       |
| 1   | Days                                                                                 |                                                                                                                      |                                                                                                                                                                                                                                                                                                                                                                                                                                                                |   |      |   |               |   |        |   |       |     |         |   |    |   |     |   |     |   |       |    |     |    |       |
| 2   | Weeks                                                                                |                                                                                                                      |                                                                                                                                                                                                                                                                                                                                                                                                                                                                |   |      |   |               |   |        |   |       |     |         |   |    |   |     |   |     |   |       |    |     |    |       |
| 3   | Months                                                                               |                                                                                                                      |                                                                                                                                                                                                                                                                                                                                                                                                                                                                |   |      |   |               |   |        |   |       |     |         |   |    |   |     |   |     |   |       |    |     |    |       |
| 4   | Years                                                                                |                                                                                                                      |                                                                                                                                                                                                                                                                                                                                                                                                                                                                |   |      |   |               |   |        |   |       |     |         |   |    |   |     |   |     |   |       |    |     |    |       |
| 999 | Unknown                                                                              |                                                                                                                      |                                                                                                                                                                                                                                                                                                                                                                                                                                                                |   |      |   |               |   |        |   |       |     |         |   |    |   |     |   |     |   |       |    |     |    |       |

|     |                                                                                      |                                                                                                       |                                                                                                                                                                                                                                                                                                                                                                                                                                                                                                                                                                                                                                                                                                                                     |   |                    |                    |                                       |                    |                                                   |     |                              |                                    |                          |                    |                              |   |                    |                          |   |                    |          |   |                    |       |   |                    |                   |
|-----|--------------------------------------------------------------------------------------|-------------------------------------------------------------------------------------------------------|-------------------------------------------------------------------------------------------------------------------------------------------------------------------------------------------------------------------------------------------------------------------------------------------------------------------------------------------------------------------------------------------------------------------------------------------------------------------------------------------------------------------------------------------------------------------------------------------------------------------------------------------------------------------------------------------------------------------------------------|---|--------------------|--------------------|---------------------------------------|--------------------|---------------------------------------------------|-----|------------------------------|------------------------------------|--------------------------|--------------------|------------------------------|---|--------------------|--------------------------|---|--------------------|----------|---|--------------------|-------|---|--------------------|-------------------|
| 647 | <b>methadone</b>                                                                     | <b>Section Header: Methadone Treatment History ****</b><br><b>Any previous exposure to methadone?</b> | <b>radio, Required</b><br><table border="1"> <tr> <td>1</td> <td>Yes</td> </tr> <tr> <td>0</td> <td>No/Unclear</td> </tr> </table>                                                                                                                                                                                                                                                                                                                                                                                                                                                                                                                                                                                                  | 1 | Yes                | 0                  | No/Unclear                            |                    |                                                   |     |                              |                                    |                          |                    |                              |   |                    |                          |   |                    |          |   |                    |       |   |                    |                   |
| 1   | Yes                                                                                  |                                                                                                       |                                                                                                                                                                                                                                                                                                                                                                                                                                                                                                                                                                                                                                                                                                                                     |   |                    |                    |                                       |                    |                                                   |     |                              |                                    |                          |                    |                              |   |                    |                          |   |                    |          |   |                    |       |   |                    |                   |
| 0   | No/Unclear                                                                           |                                                                                                       |                                                                                                                                                                                                                                                                                                                                                                                                                                                                                                                                                                                                                                                                                                                                     |   |                    |                    |                                       |                    |                                                   |     |                              |                                    |                          |                    |                              |   |                    |                          |   |                    |          |   |                    |       |   |                    |                   |
| 648 | <b>met_setting</b><br><br>Show the field ONLY if:<br>[methadone] = '1'               | <b>Setting of exposure</b>                                                                            | <b>checkbox, Required</b><br><table border="1"> <tr> <td>1</td> <td>met_setting_1</td> <td>Healthcare setting</td> </tr> <tr> <td>2</td> <td>met_setting_2</td> <td>Street</td> </tr> <tr> <td>999</td> <td>met_setting_999</td> <td>Unknown/Unclear</td> </tr> </table>                                                                                                                                                                                                                                                                                                                                                                                                                                                            | 1 | met_setting_1      | Healthcare setting | 2                                     | met_setting_2      | Street                                            | 999 | met_setting_999              | Unknown/Unclear                    |                          |                    |                              |   |                    |                          |   |                    |          |   |                    |       |   |                    |                   |
| 1   | met_setting_1                                                                        | Healthcare setting                                                                                    |                                                                                                                                                                                                                                                                                                                                                                                                                                                                                                                                                                                                                                                                                                                                     |   |                    |                    |                                       |                    |                                                   |     |                              |                                    |                          |                    |                              |   |                    |                          |   |                    |          |   |                    |       |   |                    |                   |
| 2   | met_setting_2                                                                        | Street                                                                                                |                                                                                                                                                                                                                                                                                                                                                                                                                                                                                                                                                                                                                                                                                                                                     |   |                    |                    |                                       |                    |                                                   |     |                              |                                    |                          |                    |                              |   |                    |                          |   |                    |          |   |                    |       |   |                    |                   |
| 999 | met_setting_999                                                                      | Unknown/Unclear                                                                                       |                                                                                                                                                                                                                                                                                                                                                                                                                                                                                                                                                                                                                                                                                                                                     |   |                    |                    |                                       |                    |                                                   |     |                              |                                    |                          |                    |                              |   |                    |                          |   |                    |          |   |                    |       |   |                    |                   |
| 649 | <b>any_current_opioid</b>                                                            | <b>Section Header: Current Opioid Use ****</b><br><b>Any documentation of current opioid use?</b>     | <b>yesno, Required</b><br><table border="1"> <tr> <td>1</td> <td>Yes</td> </tr> <tr> <td>0</td> <td>No</td> </tr> </table>                                                                                                                                                                                                                                                                                                                                                                                                                                                                                                                                                                                                          | 1 | Yes                | 0                  | No                                    |                    |                                                   |     |                              |                                    |                          |                    |                              |   |                    |                          |   |                    |          |   |                    |       |   |                    |                   |
| 1   | Yes                                                                                  |                                                                                                       |                                                                                                                                                                                                                                                                                                                                                                                                                                                                                                                                                                                                                                                                                                                                     |   |                    |                    |                                       |                    |                                                   |     |                              |                                    |                          |                    |                              |   |                    |                          |   |                    |          |   |                    |       |   |                    |                   |
| 0   | No                                                                                   |                                                                                                       |                                                                                                                                                                                                                                                                                                                                                                                                                                                                                                                                                                                                                                                                                                                                     |   |                    |                    |                                       |                    |                                                   |     |                              |                                    |                          |                    |                              |   |                    |                          |   |                    |          |   |                    |       |   |                    |                   |
| 650 | <b>primary_opioid</b><br><br>Show the field ONLY if:<br>[any_current_opioid] = '1'   | <b>Primary type of opioid used?</b>                                                                   | <b>radio, Required</b><br><table border="1"> <tr> <td>1</td> <td>Heroin</td> </tr> <tr> <td>2</td> <td>Oxycodone (OxyContin, Percocet, etc.)</td> </tr> <tr> <td>3</td> <td>Hydrocodone (Norco, Vicodin, etc.)</td> </tr> <tr> <td>4</td> <td>Fentanyl (Duragesic, Ionsys)</td> </tr> <tr> <td>5</td> <td>Hydromorphone (Dilaudid)</td> </tr> <tr> <td>6</td> <td>Morphine</td> </tr> <tr> <td>7</td> <td>Other</td> </tr> </table>                                                                                                                                                                                                                                                                                                 | 1 | Heroin             | 2                  | Oxycodone (OxyContin, Percocet, etc.) | 3                  | Hydrocodone (Norco, Vicodin, etc.)                | 4   | Fentanyl (Duragesic, Ionsys) | 5                                  | Hydromorphone (Dilaudid) | 6                  | Morphine                     | 7 | Other              |                          |   |                    |          |   |                    |       |   |                    |                   |
| 1   | Heroin                                                                               |                                                                                                       |                                                                                                                                                                                                                                                                                                                                                                                                                                                                                                                                                                                                                                                                                                                                     |   |                    |                    |                                       |                    |                                                   |     |                              |                                    |                          |                    |                              |   |                    |                          |   |                    |          |   |                    |       |   |                    |                   |
| 2   | Oxycodone (OxyContin, Percocet, etc.)                                                |                                                                                                       |                                                                                                                                                                                                                                                                                                                                                                                                                                                                                                                                                                                                                                                                                                                                     |   |                    |                    |                                       |                    |                                                   |     |                              |                                    |                          |                    |                              |   |                    |                          |   |                    |          |   |                    |       |   |                    |                   |
| 3   | Hydrocodone (Norco, Vicodin, etc.)                                                   |                                                                                                       |                                                                                                                                                                                                                                                                                                                                                                                                                                                                                                                                                                                                                                                                                                                                     |   |                    |                    |                                       |                    |                                                   |     |                              |                                    |                          |                    |                              |   |                    |                          |   |                    |          |   |                    |       |   |                    |                   |
| 4   | Fentanyl (Duragesic, Ionsys)                                                         |                                                                                                       |                                                                                                                                                                                                                                                                                                                                                                                                                                                                                                                                                                                                                                                                                                                                     |   |                    |                    |                                       |                    |                                                   |     |                              |                                    |                          |                    |                              |   |                    |                          |   |                    |          |   |                    |       |   |                    |                   |
| 5   | Hydromorphone (Dilaudid)                                                             |                                                                                                       |                                                                                                                                                                                                                                                                                                                                                                                                                                                                                                                                                                                                                                                                                                                                     |   |                    |                    |                                       |                    |                                                   |     |                              |                                    |                          |                    |                              |   |                    |                          |   |                    |          |   |                    |       |   |                    |                   |
| 6   | Morphine                                                                             |                                                                                                       |                                                                                                                                                                                                                                                                                                                                                                                                                                                                                                                                                                                                                                                                                                                                     |   |                    |                    |                                       |                    |                                                   |     |                              |                                    |                          |                    |                              |   |                    |                          |   |                    |          |   |                    |       |   |                    |                   |
| 7   | Other                                                                                |                                                                                                       |                                                                                                                                                                                                                                                                                                                                                                                                                                                                                                                                                                                                                                                                                                                                     |   |                    |                    |                                       |                    |                                                   |     |                              |                                    |                          |                    |                              |   |                    |                          |   |                    |          |   |                    |       |   |                    |                   |
| 651 | <b>primary_opioid_oth</b><br><br>Show the field ONLY if:<br>[primary_opioid] = '7'   | <b>If "Other," please specify.</b>                                                                    | <b>text, Required</b>                                                                                                                                                                                                                                                                                                                                                                                                                                                                                                                                                                                                                                                                                                               |   |                    |                    |                                       |                    |                                                   |     |                              |                                    |                          |                    |                              |   |                    |                          |   |                    |          |   |                    |       |   |                    |                   |
| 652 | <b>curr_opioid_type</b><br><br>Show the field ONLY if:<br>[any_current_opioid] = '1' | <b>Other opioid(s) currently used?</b><br><i>Brand names listed in parentheses</i>                    | <b>checkbox, Required</b><br><table border="1"> <tr> <td>1</td> <td>curr_opioid_type_1</td> <td>Heroin</td> </tr> <tr> <td>2</td> <td>curr_opioid_type_2</td> <td>Oxycodone (OxyContin, Percocet, Roxicodone, etc.)</td> </tr> <tr> <td>3</td> <td>curr_opioid_type_3</td> <td>Hydrocodone (Norco, Vicodin, etc.)</td> </tr> <tr> <td>4</td> <td>curr_opioid_type_4</td> <td>Fentanyl (Duragesic, Ionsys)</td> </tr> <tr> <td>5</td> <td>curr_opioid_type_5</td> <td>Hydromorphone (Dilaudid)</td> </tr> <tr> <td>6</td> <td>curr_opioid_type_6</td> <td>Morphine</td> </tr> <tr> <td>7</td> <td>curr_opioid_type_7</td> <td>Other</td> </tr> <tr> <td>0</td> <td>curr_opioid_type_0</td> <td>None of the above</td> </tr> </table> | 1 | curr_opioid_type_1 | Heroin             | 2                                     | curr_opioid_type_2 | Oxycodone (OxyContin, Percocet, Roxicodone, etc.) | 3   | curr_opioid_type_3           | Hydrocodone (Norco, Vicodin, etc.) | 4                        | curr_opioid_type_4 | Fentanyl (Duragesic, Ionsys) | 5 | curr_opioid_type_5 | Hydromorphone (Dilaudid) | 6 | curr_opioid_type_6 | Morphine | 7 | curr_opioid_type_7 | Other | 0 | curr_opioid_type_0 | None of the above |
| 1   | curr_opioid_type_1                                                                   | Heroin                                                                                                |                                                                                                                                                                                                                                                                                                                                                                                                                                                                                                                                                                                                                                                                                                                                     |   |                    |                    |                                       |                    |                                                   |     |                              |                                    |                          |                    |                              |   |                    |                          |   |                    |          |   |                    |       |   |                    |                   |
| 2   | curr_opioid_type_2                                                                   | Oxycodone (OxyContin, Percocet, Roxicodone, etc.)                                                     |                                                                                                                                                                                                                                                                                                                                                                                                                                                                                                                                                                                                                                                                                                                                     |   |                    |                    |                                       |                    |                                                   |     |                              |                                    |                          |                    |                              |   |                    |                          |   |                    |          |   |                    |       |   |                    |                   |
| 3   | curr_opioid_type_3                                                                   | Hydrocodone (Norco, Vicodin, etc.)                                                                    |                                                                                                                                                                                                                                                                                                                                                                                                                                                                                                                                                                                                                                                                                                                                     |   |                    |                    |                                       |                    |                                                   |     |                              |                                    |                          |                    |                              |   |                    |                          |   |                    |          |   |                    |       |   |                    |                   |
| 4   | curr_opioid_type_4                                                                   | Fentanyl (Duragesic, Ionsys)                                                                          |                                                                                                                                                                                                                                                                                                                                                                                                                                                                                                                                                                                                                                                                                                                                     |   |                    |                    |                                       |                    |                                                   |     |                              |                                    |                          |                    |                              |   |                    |                          |   |                    |          |   |                    |       |   |                    |                   |
| 5   | curr_opioid_type_5                                                                   | Hydromorphone (Dilaudid)                                                                              |                                                                                                                                                                                                                                                                                                                                                                                                                                                                                                                                                                                                                                                                                                                                     |   |                    |                    |                                       |                    |                                                   |     |                              |                                    |                          |                    |                              |   |                    |                          |   |                    |          |   |                    |       |   |                    |                   |
| 6   | curr_opioid_type_6                                                                   | Morphine                                                                                              |                                                                                                                                                                                                                                                                                                                                                                                                                                                                                                                                                                                                                                                                                                                                     |   |                    |                    |                                       |                    |                                                   |     |                              |                                    |                          |                    |                              |   |                    |                          |   |                    |          |   |                    |       |   |                    |                   |
| 7   | curr_opioid_type_7                                                                   | Other                                                                                                 |                                                                                                                                                                                                                                                                                                                                                                                                                                                                                                                                                                                                                                                                                                                                     |   |                    |                    |                                       |                    |                                                   |     |                              |                                    |                          |                    |                              |   |                    |                          |   |                    |          |   |                    |       |   |                    |                   |
| 0   | curr_opioid_type_0                                                                   | None of the above                                                                                     |                                                                                                                                                                                                                                                                                                                                                                                                                                                                                                                                                                                                                                                                                                                                     |   |                    |                    |                                       |                    |                                                   |     |                              |                                    |                          |                    |                              |   |                    |                          |   |                    |          |   |                    |       |   |                    |                   |
| 653 | <b>curr_opioid_oth</b><br><br>Show the field ONLY if:<br>[curr_opioid_type(7)] = '1' | <b>If "Other," please specify.</b>                                                                    | <b>text, Required</b>                                                                                                                                                                                                                                                                                                                                                                                                                                                                                                                                                                                                                                                                                                               |   |                    |                    |                                       |                    |                                                   |     |                              |                                    |                          |                    |                              |   |                    |                          |   |                    |          |   |                    |       |   |                    |                   |

| 654 | <b>her</b><br><br><b>Show the field ONLY if:</b><br><b>[primary_opioid]='1' or</b><br><b>[curr_opioid_type(1)] =</b><br><b>'1'</b>  | <b>Section Header: Opioid Use Details Check the box if "Yes"</b><br><br><b>Heroin</b> | <b>checkbox</b><br><br><table border="1"> <tr> <td>1</td> <td>her_1</td> <td>Typical amount known?</td> </tr> <tr> <td>2</td> <td>her_2</td> <td>Route known?</td> </tr> <tr> <td>3</td> <td>her_3</td> <td>Frequency known?</td> </tr> <tr> <td>4</td> <td>her_4</td> <td>Did the patient/provider specify how long the patient has been using this opioid?</td> </tr> <tr> <td>5</td> <td>her_5</td> <td>Age of first use?</td> </tr> </table>      | 1 | her_1  | Typical amount known? | 2 | her_2  | Route known? | 3 | her_3  | Frequency known? | 4 | her_4  | Did the patient/provider specify how long the patient has been using this opioid? | 5 | her_5  | Age of first use? |
|-----|-------------------------------------------------------------------------------------------------------------------------------------|---------------------------------------------------------------------------------------|-------------------------------------------------------------------------------------------------------------------------------------------------------------------------------------------------------------------------------------------------------------------------------------------------------------------------------------------------------------------------------------------------------------------------------------------------------|---|--------|-----------------------|---|--------|--------------|---|--------|------------------|---|--------|-----------------------------------------------------------------------------------|---|--------|-------------------|
| 1   | her_1                                                                                                                               | Typical amount known?                                                                 |                                                                                                                                                                                                                                                                                                                                                                                                                                                       |   |        |                       |   |        |              |   |        |                  |   |        |                                                                                   |   |        |                   |
| 2   | her_2                                                                                                                               | Route known?                                                                          |                                                                                                                                                                                                                                                                                                                                                                                                                                                       |   |        |                       |   |        |              |   |        |                  |   |        |                                                                                   |   |        |                   |
| 3   | her_3                                                                                                                               | Frequency known?                                                                      |                                                                                                                                                                                                                                                                                                                                                                                                                                                       |   |        |                       |   |        |              |   |        |                  |   |        |                                                                                   |   |        |                   |
| 4   | her_4                                                                                                                               | Did the patient/provider specify how long the patient has been using this opioid?     |                                                                                                                                                                                                                                                                                                                                                                                                                                                       |   |        |                       |   |        |              |   |        |                  |   |        |                                                                                   |   |        |                   |
| 5   | her_5                                                                                                                               | Age of first use?                                                                     |                                                                                                                                                                                                                                                                                                                                                                                                                                                       |   |        |                       |   |        |              |   |        |                  |   |        |                                                                                   |   |        |                   |
| 655 | <b>oxy</b><br><br><b>Show the field ONLY if:</b><br><b>[primary_opioid]='2' or</b><br><b>[curr_opioid_type(2)] =</b><br><b>'1'</b>  | <b>Oxycodone</b>                                                                      | <b>checkbox</b><br><br><table border="1"> <tr> <td>1</td> <td>oxy_1</td> <td>Typical amount known?</td> </tr> <tr> <td>2</td> <td>oxy_2</td> <td>Route known?</td> </tr> <tr> <td>3</td> <td>oxy_3</td> <td>Frequency known?</td> </tr> <tr> <td>4</td> <td>oxy_4</td> <td>Did the patient/provider specify how long the patient has been using this opioid?</td> </tr> <tr> <td>5</td> <td>oxy_5</td> <td>Age of first use?</td> </tr> </table>      | 1 | oxy_1  | Typical amount known? | 2 | oxy_2  | Route known? | 3 | oxy_3  | Frequency known? | 4 | oxy_4  | Did the patient/provider specify how long the patient has been using this opioid? | 5 | oxy_5  | Age of first use? |
| 1   | oxy_1                                                                                                                               | Typical amount known?                                                                 |                                                                                                                                                                                                                                                                                                                                                                                                                                                       |   |        |                       |   |        |              |   |        |                  |   |        |                                                                                   |   |        |                   |
| 2   | oxy_2                                                                                                                               | Route known?                                                                          |                                                                                                                                                                                                                                                                                                                                                                                                                                                       |   |        |                       |   |        |              |   |        |                  |   |        |                                                                                   |   |        |                   |
| 3   | oxy_3                                                                                                                               | Frequency known?                                                                      |                                                                                                                                                                                                                                                                                                                                                                                                                                                       |   |        |                       |   |        |              |   |        |                  |   |        |                                                                                   |   |        |                   |
| 4   | oxy_4                                                                                                                               | Did the patient/provider specify how long the patient has been using this opioid?     |                                                                                                                                                                                                                                                                                                                                                                                                                                                       |   |        |                       |   |        |              |   |        |                  |   |        |                                                                                   |   |        |                   |
| 5   | oxy_5                                                                                                                               | Age of first use?                                                                     |                                                                                                                                                                                                                                                                                                                                                                                                                                                       |   |        |                       |   |        |              |   |        |                  |   |        |                                                                                   |   |        |                   |
| 656 | <b>hyd</b><br><br><b>Show the field ONLY if:</b><br><b>[primary_opioid]='3' or</b><br><b>[curr_opioid_type(3)] =</b><br><b>'1'</b>  | <b>Hydrocodone</b>                                                                    | <b>checkbox</b><br><br><table border="1"> <tr> <td>1</td> <td>hyd_1</td> <td>Typical amount known?</td> </tr> <tr> <td>2</td> <td>hyd_2</td> <td>Route known?</td> </tr> <tr> <td>3</td> <td>hyd_3</td> <td>Frequency known?</td> </tr> <tr> <td>4</td> <td>hyd_4</td> <td>Did the patient/provider specify how long the patient has been using this opioid?</td> </tr> <tr> <td>5</td> <td>hyd_5</td> <td>Age of first use?</td> </tr> </table>      | 1 | hyd_1  | Typical amount known? | 2 | hyd_2  | Route known? | 3 | hyd_3  | Frequency known? | 4 | hyd_4  | Did the patient/provider specify how long the patient has been using this opioid? | 5 | hyd_5  | Age of first use? |
| 1   | hyd_1                                                                                                                               | Typical amount known?                                                                 |                                                                                                                                                                                                                                                                                                                                                                                                                                                       |   |        |                       |   |        |              |   |        |                  |   |        |                                                                                   |   |        |                   |
| 2   | hyd_2                                                                                                                               | Route known?                                                                          |                                                                                                                                                                                                                                                                                                                                                                                                                                                       |   |        |                       |   |        |              |   |        |                  |   |        |                                                                                   |   |        |                   |
| 3   | hyd_3                                                                                                                               | Frequency known?                                                                      |                                                                                                                                                                                                                                                                                                                                                                                                                                                       |   |        |                       |   |        |              |   |        |                  |   |        |                                                                                   |   |        |                   |
| 4   | hyd_4                                                                                                                               | Did the patient/provider specify how long the patient has been using this opioid?     |                                                                                                                                                                                                                                                                                                                                                                                                                                                       |   |        |                       |   |        |              |   |        |                  |   |        |                                                                                   |   |        |                   |
| 5   | hyd_5                                                                                                                               | Age of first use?                                                                     |                                                                                                                                                                                                                                                                                                                                                                                                                                                       |   |        |                       |   |        |              |   |        |                  |   |        |                                                                                   |   |        |                   |
| 657 | <b>fent</b><br><br><b>Show the field ONLY if:</b><br><b>[primary_opioid]='4' or</b><br><b>[curr_opioid_type(4)] =</b><br><b>'1'</b> | <b>Fentanyl</b>                                                                       | <b>checkbox</b><br><br><table border="1"> <tr> <td>1</td> <td>fent_1</td> <td>Typical amount known?</td> </tr> <tr> <td>2</td> <td>fent_2</td> <td>Route known?</td> </tr> <tr> <td>3</td> <td>fent_3</td> <td>Frequency known?</td> </tr> <tr> <td>4</td> <td>fent_4</td> <td>Did the patient/provider specify how long the patient has been using this opioid?</td> </tr> <tr> <td>5</td> <td>fent_5</td> <td>Age of first use?</td> </tr> </table> | 1 | fent_1 | Typical amount known? | 2 | fent_2 | Route known? | 3 | fent_3 | Frequency known? | 4 | fent_4 | Did the patient/provider specify how long the patient has been using this opioid? | 5 | fent_5 | Age of first use? |
| 1   | fent_1                                                                                                                              | Typical amount known?                                                                 |                                                                                                                                                                                                                                                                                                                                                                                                                                                       |   |        |                       |   |        |              |   |        |                  |   |        |                                                                                   |   |        |                   |
| 2   | fent_2                                                                                                                              | Route known?                                                                          |                                                                                                                                                                                                                                                                                                                                                                                                                                                       |   |        |                       |   |        |              |   |        |                  |   |        |                                                                                   |   |        |                   |
| 3   | fent_3                                                                                                                              | Frequency known?                                                                      |                                                                                                                                                                                                                                                                                                                                                                                                                                                       |   |        |                       |   |        |              |   |        |                  |   |        |                                                                                   |   |        |                   |
| 4   | fent_4                                                                                                                              | Did the patient/provider specify how long the patient has been using this opioid?     |                                                                                                                                                                                                                                                                                                                                                                                                                                                       |   |        |                       |   |        |              |   |        |                  |   |        |                                                                                   |   |        |                   |
| 5   | fent_5                                                                                                                              | Age of first use?                                                                     |                                                                                                                                                                                                                                                                                                                                                                                                                                                       |   |        |                       |   |        |              |   |        |                  |   |        |                                                                                   |   |        |                   |
| 658 | <b>hm</b><br><br><b>Show the field ONLY if:</b><br><b>[primary_opioid]='5' or</b><br><b>[curr_opioid_type(5)] =</b><br><b>'1'</b>   | <b>Hydromorphone</b>                                                                  | <b>checkbox</b><br><br><table border="1"> <tr> <td>1</td> <td>hm_1</td> <td>Typical amount known?</td> </tr> <tr> <td>2</td> <td>hm_2</td> <td>Route known?</td> </tr> <tr> <td>3</td> <td>hm_3</td> <td>Frequency known?</td> </tr> <tr> <td>4</td> <td>hm_4</td> <td>Did the patient/provider specify how long the patient has been using this opioid?</td> </tr> <tr> <td>5</td> <td>hm_5</td> <td>Age of first use?</td> </tr> </table>           | 1 | hm_1   | Typical amount known? | 2 | hm_2   | Route known? | 3 | hm_3   | Frequency known? | 4 | hm_4   | Did the patient/provider specify how long the patient has been using this opioid? | 5 | hm_5   | Age of first use? |
| 1   | hm_1                                                                                                                                | Typical amount known?                                                                 |                                                                                                                                                                                                                                                                                                                                                                                                                                                       |   |        |                       |   |        |              |   |        |                  |   |        |                                                                                   |   |        |                   |
| 2   | hm_2                                                                                                                                | Route known?                                                                          |                                                                                                                                                                                                                                                                                                                                                                                                                                                       |   |        |                       |   |        |              |   |        |                  |   |        |                                                                                   |   |        |                   |
| 3   | hm_3                                                                                                                                | Frequency known?                                                                      |                                                                                                                                                                                                                                                                                                                                                                                                                                                       |   |        |                       |   |        |              |   |        |                  |   |        |                                                                                   |   |        |                   |
| 4   | hm_4                                                                                                                                | Did the patient/provider specify how long the patient has been using this opioid?     |                                                                                                                                                                                                                                                                                                                                                                                                                                                       |   |        |                       |   |        |              |   |        |                  |   |        |                                                                                   |   |        |                   |
| 5   | hm_5                                                                                                                                | Age of first use?                                                                     |                                                                                                                                                                                                                                                                                                                                                                                                                                                       |   |        |                       |   |        |              |   |        |                  |   |        |                                                                                   |   |        |                   |

|                           |                                                                                                                                      |                                                                                                                              |                                                                                                                                                                                                                                                                                                                                                                                                                                                                                                                   |                           |  |  |   |                |                       |   |                |              |   |                |                  |   |               |                                                                                   |   |               |                   |
|---------------------------|--------------------------------------------------------------------------------------------------------------------------------------|------------------------------------------------------------------------------------------------------------------------------|-------------------------------------------------------------------------------------------------------------------------------------------------------------------------------------------------------------------------------------------------------------------------------------------------------------------------------------------------------------------------------------------------------------------------------------------------------------------------------------------------------------------|---------------------------|--|--|---|----------------|-----------------------|---|----------------|--------------|---|----------------|------------------|---|---------------|-----------------------------------------------------------------------------------|---|---------------|-------------------|
| 659                       | <b>mor</b><br><br><b>Show the field ONLY if:</b><br><b>[primary_opioid] = '6' or</b><br><b>[curr_opioid_type(6)] =</b><br><b>'1'</b> | <b>Morphine</b>                                                                                                              | <table border="1"> <tr> <td colspan="3"><b>checkbox</b></td> </tr> <tr> <td>1</td> <td>mor_1</td> <td>Typical amount known?</td> </tr> <tr> <td>2</td> <td>mor_2</td> <td>Route known?</td> </tr> <tr> <td>3</td> <td>mor_3</td> <td>Frequency known?</td> </tr> <tr> <td>4</td> <td>mor_4</td> <td>Did the patient/provider specify how long the patient has been using this opioid?</td> </tr> <tr> <td>5</td> <td>mor_5</td> <td>Age of first use?</td> </tr> </table>                                         | <b>checkbox</b>           |  |  | 1 | mor_1          | Typical amount known? | 2 | mor_2          | Route known? | 3 | mor_3          | Frequency known? | 4 | mor_4         | Did the patient/provider specify how long the patient has been using this opioid? | 5 | mor_5         | Age of first use? |
| <b>checkbox</b>           |                                                                                                                                      |                                                                                                                              |                                                                                                                                                                                                                                                                                                                                                                                                                                                                                                                   |                           |  |  |   |                |                       |   |                |              |   |                |                  |   |               |                                                                                   |   |               |                   |
| 1                         | mor_1                                                                                                                                | Typical amount known?                                                                                                        |                                                                                                                                                                                                                                                                                                                                                                                                                                                                                                                   |                           |  |  |   |                |                       |   |                |              |   |                |                  |   |               |                                                                                   |   |               |                   |
| 2                         | mor_2                                                                                                                                | Route known?                                                                                                                 |                                                                                                                                                                                                                                                                                                                                                                                                                                                                                                                   |                           |  |  |   |                |                       |   |                |              |   |                |                  |   |               |                                                                                   |   |               |                   |
| 3                         | mor_3                                                                                                                                | Frequency known?                                                                                                             |                                                                                                                                                                                                                                                                                                                                                                                                                                                                                                                   |                           |  |  |   |                |                       |   |                |              |   |                |                  |   |               |                                                                                   |   |               |                   |
| 4                         | mor_4                                                                                                                                | Did the patient/provider specify how long the patient has been using this opioid?                                            |                                                                                                                                                                                                                                                                                                                                                                                                                                                                                                                   |                           |  |  |   |                |                       |   |                |              |   |                |                  |   |               |                                                                                   |   |               |                   |
| 5                         | mor_5                                                                                                                                | Age of first use?                                                                                                            |                                                                                                                                                                                                                                                                                                                                                                                                                                                                                                                   |                           |  |  |   |                |                       |   |                |              |   |                |                  |   |               |                                                                                   |   |               |                   |
| 660                       | <b>oth_primary</b><br><br><b>Show the field ONLY if:</b><br><b>[primary_opioid] = '7'</b>                                            | <b>[primary_opioid_oth]</b>                                                                                                  | <table border="1"> <tr> <td colspan="3"><b>checkbox</b></td> </tr> <tr> <td>1</td> <td>oth_primary_1</td> <td>Typical amount known?</td> </tr> <tr> <td>2</td> <td>oth_primary_2</td> <td>Route known?</td> </tr> <tr> <td>3</td> <td>oth_primary_3</td> <td>Frequency known?</td> </tr> <tr> <td>4</td> <td>oth_primary_4</td> <td>Did the patient/provider specify how long the patient has been using this opioid?</td> </tr> <tr> <td>5</td> <td>oth_primary_5</td> <td>Age of first use?</td> </tr> </table> | <b>checkbox</b>           |  |  | 1 | oth_primary_1  | Typical amount known? | 2 | oth_primary_2  | Route known? | 3 | oth_primary_3  | Frequency known? | 4 | oth_primary_4 | Did the patient/provider specify how long the patient has been using this opioid? | 5 | oth_primary_5 | Age of first use? |
| <b>checkbox</b>           |                                                                                                                                      |                                                                                                                              |                                                                                                                                                                                                                                                                                                                                                                                                                                                                                                                   |                           |  |  |   |                |                       |   |                |              |   |                |                  |   |               |                                                                                   |   |               |                   |
| 1                         | oth_primary_1                                                                                                                        | Typical amount known?                                                                                                        |                                                                                                                                                                                                                                                                                                                                                                                                                                                                                                                   |                           |  |  |   |                |                       |   |                |              |   |                |                  |   |               |                                                                                   |   |               |                   |
| 2                         | oth_primary_2                                                                                                                        | Route known?                                                                                                                 |                                                                                                                                                                                                                                                                                                                                                                                                                                                                                                                   |                           |  |  |   |                |                       |   |                |              |   |                |                  |   |               |                                                                                   |   |               |                   |
| 3                         | oth_primary_3                                                                                                                        | Frequency known?                                                                                                             |                                                                                                                                                                                                                                                                                                                                                                                                                                                                                                                   |                           |  |  |   |                |                       |   |                |              |   |                |                  |   |               |                                                                                   |   |               |                   |
| 4                         | oth_primary_4                                                                                                                        | Did the patient/provider specify how long the patient has been using this opioid?                                            |                                                                                                                                                                                                                                                                                                                                                                                                                                                                                                                   |                           |  |  |   |                |                       |   |                |              |   |                |                  |   |               |                                                                                   |   |               |                   |
| 5                         | oth_primary_5                                                                                                                        | Age of first use?                                                                                                            |                                                                                                                                                                                                                                                                                                                                                                                                                                                                                                                   |                           |  |  |   |                |                       |   |                |              |   |                |                  |   |               |                                                                                   |   |               |                   |
| 661                       | <b>oth_other</b><br><br><b>Show the field ONLY if:</b><br><b>[curr_opioid_type(7)] =</b><br><b>'1'</b>                               | <b>[curr_opioid_oth]</b>                                                                                                     | <table border="1"> <tr> <td colspan="3"><b>checkbox</b></td> </tr> <tr> <td>1</td> <td>oth_other_1</td> <td>Typical amount known?</td> </tr> <tr> <td>2</td> <td>oth_other_2</td> <td>Route known?</td> </tr> <tr> <td>3</td> <td>oth_other_3</td> <td>Frequency known?</td> </tr> <tr> <td>4</td> <td>oth_other_4</td> <td>Did the patient/provider specify how long the patient has been using this opioid?</td> </tr> <tr> <td>5</td> <td>oth_other_5</td> <td>Age of first use?</td> </tr> </table>           | <b>checkbox</b>           |  |  | 1 | oth_other_1    | Typical amount known? | 2 | oth_other_2    | Route known? | 3 | oth_other_3    | Frequency known? | 4 | oth_other_4   | Did the patient/provider specify how long the patient has been using this opioid? | 5 | oth_other_5   | Age of first use? |
| <b>checkbox</b>           |                                                                                                                                      |                                                                                                                              |                                                                                                                                                                                                                                                                                                                                                                                                                                                                                                                   |                           |  |  |   |                |                       |   |                |              |   |                |                  |   |               |                                                                                   |   |               |                   |
| 1                         | oth_other_1                                                                                                                          | Typical amount known?                                                                                                        |                                                                                                                                                                                                                                                                                                                                                                                                                                                                                                                   |                           |  |  |   |                |                       |   |                |              |   |                |                  |   |               |                                                                                   |   |               |                   |
| 2                         | oth_other_2                                                                                                                          | Route known?                                                                                                                 |                                                                                                                                                                                                                                                                                                                                                                                                                                                                                                                   |                           |  |  |   |                |                       |   |                |              |   |                |                  |   |               |                                                                                   |   |               |                   |
| 3                         | oth_other_3                                                                                                                          | Frequency known?                                                                                                             |                                                                                                                                                                                                                                                                                                                                                                                                                                                                                                                   |                           |  |  |   |                |                       |   |                |              |   |                |                  |   |               |                                                                                   |   |               |                   |
| 4                         | oth_other_4                                                                                                                          | Did the patient/provider specify how long the patient has been using this opioid?                                            |                                                                                                                                                                                                                                                                                                                                                                                                                                                                                                                   |                           |  |  |   |                |                       |   |                |              |   |                |                  |   |               |                                                                                   |   |               |                   |
| 5                         | oth_other_5                                                                                                                          | Age of first use?                                                                                                            |                                                                                                                                                                                                                                                                                                                                                                                                                                                                                                                   |                           |  |  |   |                |                       |   |                |              |   |                |                  |   |               |                                                                                   |   |               |                   |
| 662                       | <b>her_amt_type</b><br><br><b>Show the field ONLY if:</b><br><b>[her(1)] = '1'</b>                                                   | <b>Section Header: Current Heroin Use</b><br><br><b>Heroin amount type</b><br><i>if 10 grams, select "grams."</i>            | <table border="1"> <tr> <td colspan="3"><b>checkbox, Required</b></td> </tr> <tr> <td>1</td> <td>her_amt_type_1</td> <td>grams</td> </tr> <tr> <td>2</td> <td>her_amt_type_2</td> <td>\$</td> </tr> <tr> <td>3</td> <td>her_amt_type_3</td> <td>bags</td> </tr> </table>                                                                                                                                                                                                                                          | <b>checkbox, Required</b> |  |  | 1 | her_amt_type_1 | grams                 | 2 | her_amt_type_2 | \$           | 3 | her_amt_type_3 | bags             |   |               |                                                                                   |   |               |                   |
| <b>checkbox, Required</b> |                                                                                                                                      |                                                                                                                              |                                                                                                                                                                                                                                                                                                                                                                                                                                                                                                                   |                           |  |  |   |                |                       |   |                |              |   |                |                  |   |               |                                                                                   |   |               |                   |
| 1                         | her_amt_type_1                                                                                                                       | grams                                                                                                                        |                                                                                                                                                                                                                                                                                                                                                                                                                                                                                                                   |                           |  |  |   |                |                       |   |                |              |   |                |                  |   |               |                                                                                   |   |               |                   |
| 2                         | her_amt_type_2                                                                                                                       | \$                                                                                                                           |                                                                                                                                                                                                                                                                                                                                                                                                                                                                                                                   |                           |  |  |   |                |                       |   |                |              |   |                |                  |   |               |                                                                                   |   |               |                   |
| 3                         | her_amt_type_3                                                                                                                       | bags                                                                                                                         |                                                                                                                                                                                                                                                                                                                                                                                                                                                                                                                   |                           |  |  |   |                |                       |   |                |              |   |                |                  |   |               |                                                                                   |   |               |                   |
| 663                       | <b>her_gram</b><br><br><b>Show the field ONLY if:</b><br><b>[her_amt_type(1)] = '1'</b>                                              | <b>Maximum grams of heroin documented in the chart</b><br><i>Enter numerical value. Use decimal value if fraction given.</i> | <b>text, Required</b>                                                                                                                                                                                                                                                                                                                                                                                                                                                                                             |                           |  |  |   |                |                       |   |                |              |   |                |                  |   |               |                                                                                   |   |               |                   |
| 664                       | <b>her_dollar</b><br><br><b>Show the field ONLY if:</b><br><b>[her_amt_type(2)] = '1'</b>                                            | <b>Maximum dollar amount of heroin documented in the chart.</b><br><i>Enter numerical value.</i>                             | <b>text, Required</b>                                                                                                                                                                                                                                                                                                                                                                                                                                                                                             |                           |  |  |   |                |                       |   |                |              |   |                |                  |   |               |                                                                                   |   |               |                   |
| 665                       | <b>her_bag</b><br><br><b>Show the field ONLY if:</b><br><b>[her_amt_type(3)] = '1'</b>                                               | <b>Maximum number of bags of heroin documented in the chart.</b><br><i>Enter numerical value.</i>                            | <b>text, Required</b>                                                                                                                                                                                                                                                                                                                                                                                                                                                                                             |                           |  |  |   |                |                       |   |                |              |   |                |                  |   |               |                                                                                   |   |               |                   |



|     |                                                                                                       |                                                                                                               |                                                                                                                                                                                                                                                                 |   |                        |           |         |             |        |     |                 |       |         |
|-----|-------------------------------------------------------------------------------------------------------|---------------------------------------------------------------------------------------------------------------|-----------------------------------------------------------------------------------------------------------------------------------------------------------------------------------------------------------------------------------------------------------------|---|------------------------|-----------|---------|-------------|--------|-----|-----------------|-------|---------|
| 666 | <b>her_route</b><br>Show the field ONLY if:<br>[her(2)] = '1'                                         | <b>Heroin route of administration</b>                                                                         | checkbox, Required<br><table border="1"> <tr> <td>1</td> <td>her_route_1</td> <td>Injection</td> </tr> <tr> <td>2</td> <td>her_route_2</td> <td>Snort</td> </tr> <tr> <td>3</td> <td>her_route_3</td> <td>Smoke</td> </tr> </table>                             | 1 | her_route_1            | Injection | 2       | her_route_2 | Snort  | 3   | her_route_3     | Smoke |         |
| 1   | her_route_1                                                                                           | Injection                                                                                                     |                                                                                                                                                                                                                                                                 |   |                        |           |         |             |        |     |                 |       |         |
| 2   | her_route_2                                                                                           | Snort                                                                                                         |                                                                                                                                                                                                                                                                 |   |                        |           |         |             |        |     |                 |       |         |
| 3   | her_route_3                                                                                           | Smoke                                                                                                         |                                                                                                                                                                                                                                                                 |   |                        |           |         |             |        |     |                 |       |         |
| 667 | <b>her_freq</b><br>Show the field ONLY if:<br>[her(3)] = '1'                                          | <b>Heroin frequency</b>                                                                                       | radio, Required<br><table border="1"> <tr> <td>1</td> <td>Multiple times per day</td> </tr> <tr> <td>2</td> <td>Daily</td> </tr> <tr> <td>3</td> <td>Weekly</td> </tr> <tr> <td>4</td> <td>Monthly</td> </tr> <tr> <td>999</td> <td>Unknown</td> </tr> </table> | 1 | Multiple times per day | 2         | Daily   | 3           | Weekly | 4   | Monthly         | 999   | Unknown |
| 1   | Multiple times per day                                                                                |                                                                                                               |                                                                                                                                                                                                                                                                 |   |                        |           |         |             |        |     |                 |       |         |
| 2   | Daily                                                                                                 |                                                                                                               |                                                                                                                                                                                                                                                                 |   |                        |           |         |             |        |     |                 |       |         |
| 3   | Weekly                                                                                                |                                                                                                               |                                                                                                                                                                                                                                                                 |   |                        |           |         |             |        |     |                 |       |         |
| 4   | Monthly                                                                                               |                                                                                                               |                                                                                                                                                                                                                                                                 |   |                        |           |         |             |        |     |                 |       |         |
| 999 | Unknown                                                                                               |                                                                                                               |                                                                                                                                                                                                                                                                 |   |                        |           |         |             |        |     |                 |       |         |
| 668 | <b>her_length_mx</b><br>Show the field ONLY if:<br>[her(4)] = '1'                                     | <b>Are there discrepant accounts for length of use of heroin documented in the chart?</b>                     | yesno, Required<br><table border="1"> <tr> <td>1</td> <td>Yes</td> </tr> <tr> <td>0</td> <td>No</td> </tr> </table>                                                                                                                                             | 1 | Yes                    | 0         | No      |             |        |     |                 |       |         |
| 1   | Yes                                                                                                   |                                                                                                               |                                                                                                                                                                                                                                                                 |   |                        |           |         |             |        |     |                 |       |         |
| 0   | No                                                                                                    |                                                                                                               |                                                                                                                                                                                                                                                                 |   |                        |           |         |             |        |     |                 |       |         |
| 669 | <b>her_length_max</b><br>Show the field ONLY if:<br>[her_length_mx] = '1'                             | <b>Maximum length of use documented</b><br>Enter numerical value.                                             | text, Required                                                                                                                                                                                                                                                  |   |                        |           |         |             |        |     |                 |       |         |
| 670 | <b>her_length_min</b><br>Show the field ONLY if:<br>[her_length_mx] = '1'                             | <b>Minimum length of use documented</b><br>Enter numerical value.                                             | text, Required                                                                                                                                                                                                                                                  |   |                        |           |         |             |        |     |                 |       |         |
| 671 | <b>her_length_avg</b><br>Show the field ONLY if:<br>[her_length_mx] = '1'                             | <b>Average length of use</b>                                                                                  | calc, Required<br>Calculation: mean([her_length_max], [her_length_min])                                                                                                                                                                                         |   |                        |           |         |             |        |     |                 |       |         |
| 672 | <b>her_length_1</b><br>Show the field ONLY if:<br>[her_length_mx] = '0'                               | <b>Length of use</b><br>If 5 years, enter "5." Enter "999" if unknown.                                        | text, Required                                                                                                                                                                                                                                                  |   |                        |           |         |             |        |     |                 |       |         |
| 673 | <b>her_length_2</b><br>Show the field ONLY if:<br>[her(4)] = '1'                                      | <b>Unit of time</b><br>If 5 years, select "Years."                                                            | radio, Required<br><table border="1"> <tr> <td>1</td> <td>Days</td> </tr> <tr> <td>2</td> <td>Weeks</td> </tr> <tr> <td>3</td> <td>Months</td> </tr> <tr> <td>4</td> <td>Years</td> </tr> <tr> <td>999</td> <td>Unknown</td> </tr> </table>                     | 1 | Days                   | 2         | Weeks   | 3           | Months | 4   | Years           | 999   | Unknown |
| 1   | Days                                                                                                  |                                                                                                               |                                                                                                                                                                                                                                                                 |   |                        |           |         |             |        |     |                 |       |         |
| 2   | Weeks                                                                                                 |                                                                                                               |                                                                                                                                                                                                                                                                 |   |                        |           |         |             |        |     |                 |       |         |
| 3   | Months                                                                                                |                                                                                                               |                                                                                                                                                                                                                                                                 |   |                        |           |         |             |        |     |                 |       |         |
| 4   | Years                                                                                                 |                                                                                                               |                                                                                                                                                                                                                                                                 |   |                        |           |         |             |        |     |                 |       |         |
| 999 | Unknown                                                                                               |                                                                                                               |                                                                                                                                                                                                                                                                 |   |                        |           |         |             |        |     |                 |       |         |
| 674 | <b>her_age</b><br>Show the field ONLY if:<br>[her(5)] = '1'                                           | <b>Age of first use</b>                                                                                       | text, Required                                                                                                                                                                                                                                                  |   |                        |           |         |             |        |     |                 |       |         |
| 675 | <b>oxy_use</b><br>Show the field ONLY if:<br>[primary_opioid] = '2' or<br>[curr_opioid_type(2)] = '1' | <b>Section Header: Current Oxycodone Use</b><br><b>Is this use of oxycodone prescribed, illicit, or both?</b> | radio, Required<br><table border="1"> <tr> <td>1</td> <td>Prescribed</td> </tr> <tr> <td>2</td> <td>Illicit</td> </tr> <tr> <td>3</td> <td>Both</td> </tr> <tr> <td>999</td> <td>Unknown/Unclear</td> </tr> </table>                                            | 1 | Prescribed             | 2         | Illicit | 3           | Both   | 999 | Unknown/Unclear |       |         |
| 1   | Prescribed                                                                                            |                                                                                                               |                                                                                                                                                                                                                                                                 |   |                        |           |         |             |        |     |                 |       |         |
| 2   | Illicit                                                                                               |                                                                                                               |                                                                                                                                                                                                                                                                 |   |                        |           |         |             |        |     |                 |       |         |
| 3   | Both                                                                                                  |                                                                                                               |                                                                                                                                                                                                                                                                 |   |                        |           |         |             |        |     |                 |       |         |
| 999 | Unknown/Unclear                                                                                       |                                                                                                               |                                                                                                                                                                                                                                                                 |   |                        |           |         |             |        |     |                 |       |         |

|     |                                                                           |                                                                                                                                            |                                                                                                                                                                                                                                                                                                        |   |                        |            |       |                |        |   |                |       |   |             |         |
|-----|---------------------------------------------------------------------------|--------------------------------------------------------------------------------------------------------------------------------------------|--------------------------------------------------------------------------------------------------------------------------------------------------------------------------------------------------------------------------------------------------------------------------------------------------------|---|------------------------|------------|-------|----------------|--------|---|----------------|-------|---|-------------|---------|
| 676 | <b>oxy_amt_type</b><br>Show the field ONLY if:<br>[oxy(1)] = '1'          | <b>Oxycodone amount type</b><br><i>if 10 grams, select "grams."</i>                                                                        | <b>checkbox, Required</b><br><table border="1"> <tr> <td>1</td> <td>oxy_amt_type_1</td> <td>milligrams</td> </tr> <tr> <td>2</td> <td>oxy_amt_type_2</td> <td>\$</td> </tr> <tr> <td>3</td> <td>oxy_amt_type_3</td> <td>pills</td> </tr> </table>                                                      | 1 | oxy_amt_type_1         | milligrams | 2     | oxy_amt_type_2 | \$     | 3 | oxy_amt_type_3 | pills |   |             |         |
| 1   | oxy_amt_type_1                                                            | milligrams                                                                                                                                 |                                                                                                                                                                                                                                                                                                        |   |                        |            |       |                |        |   |                |       |   |             |         |
| 2   | oxy_amt_type_2                                                            | \$                                                                                                                                         |                                                                                                                                                                                                                                                                                                        |   |                        |            |       |                |        |   |                |       |   |             |         |
| 3   | oxy_amt_type_3                                                            | pills                                                                                                                                      |                                                                                                                                                                                                                                                                                                        |   |                        |            |       |                |        |   |                |       |   |             |         |
| 677 | <b>oxy_mg</b><br>Show the field ONLY if:<br>[oxy_amt_type(1)] = '1'       | <b>Maximum milligram amount of oxycodone documented in the chart</b><br><i>Enter numerical value. Use decimal value if fraction given.</i> | <b>text, Required</b>                                                                                                                                                                                                                                                                                  |   |                        |            |       |                |        |   |                |       |   |             |         |
| 678 | <b>oxy_dollar</b><br>Show the field ONLY if:<br>[oxy_amt_type(2)] = '1'   | <b>Maximum dollar amount of oxycodone documented in the chart</b><br><i>Enter numerical value.</i>                                         | <b>text, Required</b>                                                                                                                                                                                                                                                                                  |   |                        |            |       |                |        |   |                |       |   |             |         |
| 679 | <b>oxy_pills</b><br>Show the field ONLY if:<br>[oxy_amt_type(3)] = '1'    | <b>Maximum number of oxycodone pills documented in the chart</b><br><i>Enter numerical value.</i>                                          | <b>text, Required</b>                                                                                                                                                                                                                                                                                  |   |                        |            |       |                |        |   |                |       |   |             |         |
| 680 | <b>oxy_route</b><br>Show the field ONLY if:<br>[oxy(2)] = '1'             | <b>Oxycodone route of administration</b>                                                                                                   | <b>checkbox, Required</b><br><table border="1"> <tr> <td>1</td> <td>oxy_route_1</td> <td>Injection</td> </tr> <tr> <td>2</td> <td>oxy_route_2</td> <td>Snort</td> </tr> <tr> <td>3</td> <td>oxy_route_3</td> <td>Smoke</td> </tr> <tr> <td>4</td> <td>oxy_route_4</td> <td>Swallow</td> </tr> </table> | 1 | oxy_route_1            | Injection  | 2     | oxy_route_2    | Snort  | 3 | oxy_route_3    | Smoke | 4 | oxy_route_4 | Swallow |
| 1   | oxy_route_1                                                               | Injection                                                                                                                                  |                                                                                                                                                                                                                                                                                                        |   |                        |            |       |                |        |   |                |       |   |             |         |
| 2   | oxy_route_2                                                               | Snort                                                                                                                                      |                                                                                                                                                                                                                                                                                                        |   |                        |            |       |                |        |   |                |       |   |             |         |
| 3   | oxy_route_3                                                               | Smoke                                                                                                                                      |                                                                                                                                                                                                                                                                                                        |   |                        |            |       |                |        |   |                |       |   |             |         |
| 4   | oxy_route_4                                                               | Swallow                                                                                                                                    |                                                                                                                                                                                                                                                                                                        |   |                        |            |       |                |        |   |                |       |   |             |         |
| 681 | <b>oxy_freq</b><br>Show the field ONLY if:<br>[oxy(3)] = '1'              | <b>Oxycodone frequency</b>                                                                                                                 | <b>radio, Required</b><br><table border="1"> <tr> <td>1</td> <td>Multiple times per day</td> </tr> <tr> <td>2</td> <td>Daily</td> </tr> <tr> <td>3</td> <td>Weekly</td> </tr> <tr> <td>4</td> <td>Monthly</td> </tr> </table>                                                                          | 1 | Multiple times per day | 2          | Daily | 3              | Weekly | 4 | Monthly        |       |   |             |         |
| 1   | Multiple times per day                                                    |                                                                                                                                            |                                                                                                                                                                                                                                                                                                        |   |                        |            |       |                |        |   |                |       |   |             |         |
| 2   | Daily                                                                     |                                                                                                                                            |                                                                                                                                                                                                                                                                                                        |   |                        |            |       |                |        |   |                |       |   |             |         |
| 3   | Weekly                                                                    |                                                                                                                                            |                                                                                                                                                                                                                                                                                                        |   |                        |            |       |                |        |   |                |       |   |             |         |
| 4   | Monthly                                                                   |                                                                                                                                            |                                                                                                                                                                                                                                                                                                        |   |                        |            |       |                |        |   |                |       |   |             |         |
| 682 | <b>oxy_length_mx</b><br>Show the field ONLY if:<br>[oxy(4)] = '1'         | <b>Are there discrepant accounts for length of use of oxycodone documented in the chart?</b>                                               | <b>yesno, Required</b><br><table border="1"> <tr> <td>1</td> <td>Yes</td> </tr> <tr> <td>0</td> <td>No</td> </tr> </table>                                                                                                                                                                             | 1 | Yes                    | 0          | No    |                |        |   |                |       |   |             |         |
| 1   | Yes                                                                       |                                                                                                                                            |                                                                                                                                                                                                                                                                                                        |   |                        |            |       |                |        |   |                |       |   |             |         |
| 0   | No                                                                        |                                                                                                                                            |                                                                                                                                                                                                                                                                                                        |   |                        |            |       |                |        |   |                |       |   |             |         |
| 683 | <b>oxy_length_max</b><br>Show the field ONLY if:<br>[oxy_length_mx] = '1' | <b>Maximum length of use documented</b><br><i>Enter numerical value.</i>                                                                   | <b>text, Required</b>                                                                                                                                                                                                                                                                                  |   |                        |            |       |                |        |   |                |       |   |             |         |
| 684 | <b>oxy_length_min</b><br>Show the field ONLY if:<br>[oxy_length_mx] = '1' | <b>Minimum length of use documented</b><br><i>Enter numerical value.</i>                                                                   | <b>text, Required</b>                                                                                                                                                                                                                                                                                  |   |                        |            |       |                |        |   |                |       |   |             |         |
| 685 | <b>oxy_length_avg</b><br>Show the field ONLY if:<br>[oxy_length_mx] = '1' | <b>Average length of use</b>                                                                                                               | <b>calc, Required</b><br>Calculation: mean([oxy_length_max] , [oxy_length_min])                                                                                                                                                                                                                        |   |                        |            |       |                |        |   |                |       |   |             |         |
| 686 | <b>oxy_length_1</b><br>Show the field ONLY if:<br>[oxy_length_mx] = '0'   | <b>Length of use</b><br><i>If 5 years, enter "5." Enter "999" if unknown.</i>                                                              | <b>text, Required</b>                                                                                                                                                                                                                                                                                  |   |                        |            |       |                |        |   |                |       |   |             |         |

|     |                                                                                              |                                                                                                                                              |                                                                                                                                                                                                                                                                                        |   |                        |            |         |                |        |     |                 |       |         |             |         |
|-----|----------------------------------------------------------------------------------------------|----------------------------------------------------------------------------------------------------------------------------------------------|----------------------------------------------------------------------------------------------------------------------------------------------------------------------------------------------------------------------------------------------------------------------------------------|---|------------------------|------------|---------|----------------|--------|-----|-----------------|-------|---------|-------------|---------|
| 687 | oxy_length_2<br>Show the field ONLY if:<br>[oxy(4)] = '1'                                    | <b>Unit of time</b><br><i>If 5 years, select "Years."</i>                                                                                    | <b>radio, Required</b><br><table border="1"> <tr><td>1</td><td>Days</td></tr> <tr><td>2</td><td>Weeks</td></tr> <tr><td>3</td><td>Months</td></tr> <tr><td>4</td><td>Years</td></tr> <tr><td>999</td><td>Unknown</td></tr> </table>                                                    | 1 | Days                   | 2          | Weeks   | 3              | Months | 4   | Years           | 999   | Unknown |             |         |
| 1   | Days                                                                                         |                                                                                                                                              |                                                                                                                                                                                                                                                                                        |   |                        |            |         |                |        |     |                 |       |         |             |         |
| 2   | Weeks                                                                                        |                                                                                                                                              |                                                                                                                                                                                                                                                                                        |   |                        |            |         |                |        |     |                 |       |         |             |         |
| 3   | Months                                                                                       |                                                                                                                                              |                                                                                                                                                                                                                                                                                        |   |                        |            |         |                |        |     |                 |       |         |             |         |
| 4   | Years                                                                                        |                                                                                                                                              |                                                                                                                                                                                                                                                                                        |   |                        |            |         |                |        |     |                 |       |         |             |         |
| 999 | Unknown                                                                                      |                                                                                                                                              |                                                                                                                                                                                                                                                                                        |   |                        |            |         |                |        |     |                 |       |         |             |         |
| 688 | oxy_age<br>Show the field ONLY if:<br>[oxy(5)] = '1'                                         | <b>Age of first use</b>                                                                                                                      | <b>text, Required</b>                                                                                                                                                                                                                                                                  |   |                        |            |         |                |        |     |                 |       |         |             |         |
| 689 | hyd_use<br>Show the field ONLY if:<br>[primary_opioid]='3' or<br>[curr_opioid_type(3)] = '1' | <b>Section Header:</b> <i>Current Hydrocodone Use</i><br><b>Is this use of hydrocodone prescribed, illicit, or both?</b>                     | <b>radio, Required</b><br><table border="1"> <tr><td>1</td><td>Prescribed</td></tr> <tr><td>2</td><td>Illicit</td></tr> <tr><td>3</td><td>Both</td></tr> <tr><td>999</td><td>Unknown/Unclear</td></tr> </table>                                                                        | 1 | Prescribed             | 2          | Illicit | 3              | Both   | 999 | Unknown/Unclear |       |         |             |         |
| 1   | Prescribed                                                                                   |                                                                                                                                              |                                                                                                                                                                                                                                                                                        |   |                        |            |         |                |        |     |                 |       |         |             |         |
| 2   | Illicit                                                                                      |                                                                                                                                              |                                                                                                                                                                                                                                                                                        |   |                        |            |         |                |        |     |                 |       |         |             |         |
| 3   | Both                                                                                         |                                                                                                                                              |                                                                                                                                                                                                                                                                                        |   |                        |            |         |                |        |     |                 |       |         |             |         |
| 999 | Unknown/Unclear                                                                              |                                                                                                                                              |                                                                                                                                                                                                                                                                                        |   |                        |            |         |                |        |     |                 |       |         |             |         |
| 690 | hyd_amt_type<br>Show the field ONLY if:<br>[hyd(1)] = '1'                                    | <b>Hydrocodone amount type</b><br><i>if 10 grams, select "grams."</i>                                                                        | <b>checkbox, Required</b><br><table border="1"> <tr><td>1</td><td>hyd_amt_type_1</td><td>milligrams</td></tr> <tr><td>2</td><td>hyd_amt_type_2</td><td>\$</td></tr> <tr><td>3</td><td>hyd_amt_type_3</td><td>pills</td></tr> </table>                                                  | 1 | hyd_amt_type_1         | milligrams | 2       | hyd_amt_type_2 | \$     | 3   | hyd_amt_type_3  | pills |         |             |         |
| 1   | hyd_amt_type_1                                                                               | milligrams                                                                                                                                   |                                                                                                                                                                                                                                                                                        |   |                        |            |         |                |        |     |                 |       |         |             |         |
| 2   | hyd_amt_type_2                                                                               | \$                                                                                                                                           |                                                                                                                                                                                                                                                                                        |   |                        |            |         |                |        |     |                 |       |         |             |         |
| 3   | hyd_amt_type_3                                                                               | pills                                                                                                                                        |                                                                                                                                                                                                                                                                                        |   |                        |            |         |                |        |     |                 |       |         |             |         |
| 691 | hyd_mg<br>Show the field ONLY if:<br>[hyd_amt_type(1)] = '1'                                 | <b>Maximum milligram amount of hydrocodone documented in the chart</b><br><i>Enter numerical value. Use decimal value if fraction given.</i> | <b>text, Required</b>                                                                                                                                                                                                                                                                  |   |                        |            |         |                |        |     |                 |       |         |             |         |
| 692 | hyd_max_2<br>Show the field ONLY if:<br>[hyd_amt_type(2)] = '1'                              | <b>Maximum dollar amount of hydrocodone documented in the chart</b><br><i>Enter numerical value.</i>                                         | <b>text, Required</b>                                                                                                                                                                                                                                                                  |   |                        |            |         |                |        |     |                 |       |         |             |         |
| 693 | hyd_max_3<br>Show the field ONLY if:<br>[hyd_amt_type(3)] = '1'                              | <b>Maximum number of hydrocodone pills documented in the chart</b><br><i>Enter numerical value.</i>                                          | <b>text, Required</b>                                                                                                                                                                                                                                                                  |   |                        |            |         |                |        |     |                 |       |         |             |         |
| 694 | hyd_route<br>Show the field ONLY if:<br>[hyd(2)] = '1'                                       | <b>Hydrocodone route of administration</b>                                                                                                   | <b>checkbox, Required</b><br><table border="1"> <tr><td>1</td><td>hyd_route_1</td><td>Injection</td></tr> <tr><td>2</td><td>hyd_route_2</td><td>Snort</td></tr> <tr><td>3</td><td>hyd_route_3</td><td>Smoke</td></tr> <tr><td>4</td><td>hyd_route_4</td><td>Swallow</td></tr> </table> | 1 | hyd_route_1            | Injection  | 2       | hyd_route_2    | Snort  | 3   | hyd_route_3     | Smoke | 4       | hyd_route_4 | Swallow |
| 1   | hyd_route_1                                                                                  | Injection                                                                                                                                    |                                                                                                                                                                                                                                                                                        |   |                        |            |         |                |        |     |                 |       |         |             |         |
| 2   | hyd_route_2                                                                                  | Snort                                                                                                                                        |                                                                                                                                                                                                                                                                                        |   |                        |            |         |                |        |     |                 |       |         |             |         |
| 3   | hyd_route_3                                                                                  | Smoke                                                                                                                                        |                                                                                                                                                                                                                                                                                        |   |                        |            |         |                |        |     |                 |       |         |             |         |
| 4   | hyd_route_4                                                                                  | Swallow                                                                                                                                      |                                                                                                                                                                                                                                                                                        |   |                        |            |         |                |        |     |                 |       |         |             |         |
| 695 | hyd_freq<br>Show the field ONLY if:<br>[hyd(3)] = '1'                                        | <b>Hydrocodone frequency</b>                                                                                                                 | <b>radio, Required</b><br><table border="1"> <tr><td>1</td><td>Multiple times per day</td></tr> <tr><td>2</td><td>Daily</td></tr> <tr><td>3</td><td>Weekly</td></tr> <tr><td>4</td><td>Monthly</td></tr> </table>                                                                      | 1 | Multiple times per day | 2          | Daily   | 3              | Weekly | 4   | Monthly         |       |         |             |         |
| 1   | Multiple times per day                                                                       |                                                                                                                                              |                                                                                                                                                                                                                                                                                        |   |                        |            |         |                |        |     |                 |       |         |             |         |
| 2   | Daily                                                                                        |                                                                                                                                              |                                                                                                                                                                                                                                                                                        |   |                        |            |         |                |        |     |                 |       |         |             |         |
| 3   | Weekly                                                                                       |                                                                                                                                              |                                                                                                                                                                                                                                                                                        |   |                        |            |         |                |        |     |                 |       |         |             |         |
| 4   | Monthly                                                                                      |                                                                                                                                              |                                                                                                                                                                                                                                                                                        |   |                        |            |         |                |        |     |                 |       |         |             |         |
| 696 | hyd_length_mx<br>Show the field ONLY if:<br>[hyd(4)] = '1'                                   | <b>Are there discrepant accounts for length of use of hydrocodone documented in the chart?</b>                                               | <b>yesno, Required</b><br><table border="1"> <tr><td>1</td><td>Yes</td></tr> <tr><td>0</td><td>No</td></tr> </table>                                                                                                                                                                   | 1 | Yes                    | 0          | No      |                |        |     |                 |       |         |             |         |
| 1   | Yes                                                                                          |                                                                                                                                              |                                                                                                                                                                                                                                                                                        |   |                        |            |         |                |        |     |                 |       |         |             |         |
| 0   | No                                                                                           |                                                                                                                                              |                                                                                                                                                                                                                                                                                        |   |                        |            |         |                |        |     |                 |       |         |             |         |

|     |                                                                                                                   |                                                                                                                                           |                                                                                                                                                                                                                                       |   |                 |            |         |                 |        |     |                 |       |         |
|-----|-------------------------------------------------------------------------------------------------------------------|-------------------------------------------------------------------------------------------------------------------------------------------|---------------------------------------------------------------------------------------------------------------------------------------------------------------------------------------------------------------------------------------|---|-----------------|------------|---------|-----------------|--------|-----|-----------------|-------|---------|
| 697 | <b>hyd_length_max</b><br><b>Show the field ONLY if:</b><br><b>[hyd_length_mx] = '1'</b>                           | <b>Maximum length of use documented</b><br><i>Enter numerical value.</i>                                                                  | text, Required                                                                                                                                                                                                                        |   |                 |            |         |                 |        |     |                 |       |         |
| 698 | <b>hyd_length_min</b><br><b>Show the field ONLY if:</b><br><b>[hyd_length_mx] = '1'</b>                           | <b>Minimum length of use documented</b><br><i>Enter numerical value.</i>                                                                  | text, Required                                                                                                                                                                                                                        |   |                 |            |         |                 |        |     |                 |       |         |
| 699 | <b>hyd_length_avg</b><br><b>Show the field ONLY if:</b><br><b>[hyd_length_mx] = '1'</b>                           | <b>Average length of use</b>                                                                                                              | <b>calc, Required</b><br><b>Calculation: mean([hyd_length_max] , [hyd_length_min])</b>                                                                                                                                                |   |                 |            |         |                 |        |     |                 |       |         |
| 700 | <b>hyd_length_1</b><br><b>Show the field ONLY if:</b><br><b>[hyd_length_mx] = '0'</b>                             | <b>Length of use</b><br><i>If 5 years, enter "5." Enter "999" if unknown.</i>                                                             | text, Required                                                                                                                                                                                                                        |   |                 |            |         |                 |        |     |                 |       |         |
| 701 | <b>hyd_length_2</b><br><b>Show the field ONLY if:</b><br><b>[hyd(4)] = '1'</b>                                    | <b>Unit of time</b><br><i>If 5 years, select "Years."</i>                                                                                 | <b>radio, Required</b> <table border="1"> <tr><td>1</td><td>Days</td></tr> <tr><td>2</td><td>Weeks</td></tr> <tr><td>3</td><td>Months</td></tr> <tr><td>4</td><td>Years</td></tr> <tr><td>999</td><td>Unknown</td></tr> </table>      | 1 | Days            | 2          | Weeks   | 3               | Months | 4   | Years           | 999   | Unknown |
| 1   | Days                                                                                                              |                                                                                                                                           |                                                                                                                                                                                                                                       |   |                 |            |         |                 |        |     |                 |       |         |
| 2   | Weeks                                                                                                             |                                                                                                                                           |                                                                                                                                                                                                                                       |   |                 |            |         |                 |        |     |                 |       |         |
| 3   | Months                                                                                                            |                                                                                                                                           |                                                                                                                                                                                                                                       |   |                 |            |         |                 |        |     |                 |       |         |
| 4   | Years                                                                                                             |                                                                                                                                           |                                                                                                                                                                                                                                       |   |                 |            |         |                 |        |     |                 |       |         |
| 999 | Unknown                                                                                                           |                                                                                                                                           |                                                                                                                                                                                                                                       |   |                 |            |         |                 |        |     |                 |       |         |
| 702 | <b>hyd_age</b><br><b>Show the field ONLY if:</b><br><b>[hyd(5)] = '1'</b>                                         | <b>Age of first use</b>                                                                                                                   | text, Required                                                                                                                                                                                                                        |   |                 |            |         |                 |        |     |                 |       |         |
| 703 | <b>fent_use</b><br><b>Show the field ONLY if:</b><br><b>[primary_opioid] = '4' or [curr_opioid_type(4)] = '1'</b> | <b>Section Header: Current Fentanyl Use</b><br><b>Is this use of fentanyl prescribed, illicit, or both?</b>                               | <b>radio, Required</b> <table border="1"> <tr><td>1</td><td>Prescribed</td></tr> <tr><td>2</td><td>Illicit</td></tr> <tr><td>3</td><td>Both</td></tr> <tr><td>999</td><td>Unknown/Unclear</td></tr> </table>                          | 1 | Prescribed      | 2          | Illicit | 3               | Both   | 999 | Unknown/Unclear |       |         |
| 1   | Prescribed                                                                                                        |                                                                                                                                           |                                                                                                                                                                                                                                       |   |                 |            |         |                 |        |     |                 |       |         |
| 2   | Illicit                                                                                                           |                                                                                                                                           |                                                                                                                                                                                                                                       |   |                 |            |         |                 |        |     |                 |       |         |
| 3   | Both                                                                                                              |                                                                                                                                           |                                                                                                                                                                                                                                       |   |                 |            |         |                 |        |     |                 |       |         |
| 999 | Unknown/Unclear                                                                                                   |                                                                                                                                           |                                                                                                                                                                                                                                       |   |                 |            |         |                 |        |     |                 |       |         |
| 704 | <b>fent_amt_type</b><br><b>Show the field ONLY if:</b><br><b>[fent(1)] = '1'</b>                                  | <b>Fentanyl amount type</b><br><i>if 10 grams, select "grams."</i>                                                                        | <b>checkbox, Required</b> <table border="1"> <tr><td>1</td><td>fent_amt_type_1</td><td>micrograms</td></tr> <tr><td>2</td><td>fent_amt_type_2</td><td>\$</td></tr> <tr><td>3</td><td>fent_amt_type_3</td><td>grams</td></tr> </table> | 1 | fent_amt_type_1 | micrograms | 2       | fent_amt_type_2 | \$     | 3   | fent_amt_type_3 | grams |         |
| 1   | fent_amt_type_1                                                                                                   | micrograms                                                                                                                                |                                                                                                                                                                                                                                       |   |                 |            |         |                 |        |     |                 |       |         |
| 2   | fent_amt_type_2                                                                                                   | \$                                                                                                                                        |                                                                                                                                                                                                                                       |   |                 |            |         |                 |        |     |                 |       |         |
| 3   | fent_amt_type_3                                                                                                   | grams                                                                                                                                     |                                                                                                                                                                                                                                       |   |                 |            |         |                 |        |     |                 |       |         |
| 705 | <b>fent_mcg</b><br><b>Show the field ONLY if:</b><br><b>[fent_amt_type(1)] = '1'</b>                              | <b>Maximum microgram amount of fentanyl documented in the chart</b><br><i>Enter numerical value. Use decimal value if fraction given.</i> | text, Required                                                                                                                                                                                                                        |   |                 |            |         |                 |        |     |                 |       |         |
| 706 | <b>fent_dollar</b><br><b>Show the field ONLY if:</b><br><b>[fent_amt_type(2)] = '1'</b>                           | <b>Maximum dollar amount of fentanyl documented in the chart</b><br><i>Enter numerical value.</i>                                         | text, Required                                                                                                                                                                                                                        |   |                 |            |         |                 |        |     |                 |       |         |
| 707 | <b>fent_gram</b><br><b>Show the field ONLY if:</b><br><b>[fent_amt_type(3)] = '1'</b>                             | <b>Maximum gram amount of fentanyl documented in the chart</b><br><i>Enter numerical value.</i>                                           | text, Required                                                                                                                                                                                                                        |   |                 |            |         |                 |        |     |                 |       |         |

|     |                                                                                                      |                                                                                                                       |                                                                                                                                                                                                                                                                                                                                                   |   |                        |           |         |              |        |     |                 |       |         |              |         |   |              |       |
|-----|------------------------------------------------------------------------------------------------------|-----------------------------------------------------------------------------------------------------------------------|---------------------------------------------------------------------------------------------------------------------------------------------------------------------------------------------------------------------------------------------------------------------------------------------------------------------------------------------------|---|------------------------|-----------|---------|--------------|--------|-----|-----------------|-------|---------|--------------|---------|---|--------------|-------|
| 708 | <b>fent_route</b><br>Show the field ONLY if:<br>[fent(2)] = '1'                                      | <b>Fentanyl route of administration</b>                                                                               | <b>checkbox, Required</b><br><table border="1"> <tr><td>1</td><td>fent_route_1</td><td>Injection</td></tr> <tr><td>2</td><td>fent_route_2</td><td>Snort</td></tr> <tr><td>3</td><td>fent_route_3</td><td>Smoke</td></tr> <tr><td>4</td><td>fent_route_4</td><td>Swallow</td></tr> <tr><td>5</td><td>fent_route_5</td><td>Patch</td></tr> </table> | 1 | fent_route_1           | Injection | 2       | fent_route_2 | Snort  | 3   | fent_route_3    | Smoke | 4       | fent_route_4 | Swallow | 5 | fent_route_5 | Patch |
| 1   | fent_route_1                                                                                         | Injection                                                                                                             |                                                                                                                                                                                                                                                                                                                                                   |   |                        |           |         |              |        |     |                 |       |         |              |         |   |              |       |
| 2   | fent_route_2                                                                                         | Snort                                                                                                                 |                                                                                                                                                                                                                                                                                                                                                   |   |                        |           |         |              |        |     |                 |       |         |              |         |   |              |       |
| 3   | fent_route_3                                                                                         | Smoke                                                                                                                 |                                                                                                                                                                                                                                                                                                                                                   |   |                        |           |         |              |        |     |                 |       |         |              |         |   |              |       |
| 4   | fent_route_4                                                                                         | Swallow                                                                                                               |                                                                                                                                                                                                                                                                                                                                                   |   |                        |           |         |              |        |     |                 |       |         |              |         |   |              |       |
| 5   | fent_route_5                                                                                         | Patch                                                                                                                 |                                                                                                                                                                                                                                                                                                                                                   |   |                        |           |         |              |        |     |                 |       |         |              |         |   |              |       |
| 709 | <b>fent_freq</b><br>Show the field ONLY if:<br>[fent(3)] = '1'                                       | <b>Fentanyl frequency</b>                                                                                             | <b>radio, Required</b><br><table border="1"> <tr><td>1</td><td>Multiple times per day</td></tr> <tr><td>2</td><td>Daily</td></tr> <tr><td>3</td><td>Weekly</td></tr> <tr><td>4</td><td>Monthly</td></tr> </table>                                                                                                                                 | 1 | Multiple times per day | 2         | Daily   | 3            | Weekly | 4   | Monthly         |       |         |              |         |   |              |       |
| 1   | Multiple times per day                                                                               |                                                                                                                       |                                                                                                                                                                                                                                                                                                                                                   |   |                        |           |         |              |        |     |                 |       |         |              |         |   |              |       |
| 2   | Daily                                                                                                |                                                                                                                       |                                                                                                                                                                                                                                                                                                                                                   |   |                        |           |         |              |        |     |                 |       |         |              |         |   |              |       |
| 3   | Weekly                                                                                               |                                                                                                                       |                                                                                                                                                                                                                                                                                                                                                   |   |                        |           |         |              |        |     |                 |       |         |              |         |   |              |       |
| 4   | Monthly                                                                                              |                                                                                                                       |                                                                                                                                                                                                                                                                                                                                                   |   |                        |           |         |              |        |     |                 |       |         |              |         |   |              |       |
| 710 | <b>fent_length_mx</b><br>Show the field ONLY if:<br>[fent(4)] = '1'                                  | <b>Are there discrepant accounts for length of use of fentanyl documented in the chart?</b>                           | <b>yesno, Required</b><br><table border="1"> <tr><td>1</td><td>Yes</td></tr> </table>                                                                                                                                                                                                                                                             | 1 | Yes                    |           |         |              |        |     |                 |       |         |              |         |   |              |       |
| 1   | Yes                                                                                                  |                                                                                                                       |                                                                                                                                                                                                                                                                                                                                                   |   |                        |           |         |              |        |     |                 |       |         |              |         |   |              |       |
| 711 | <b>fent_length_max</b><br>Show the field ONLY if:<br>[fent_length_mx] = '1'                          | <b>Maximum length of use documented</b><br><i>Enter numerical value.</i>                                              | <b>0 No</b><br><b>text, Required</b>                                                                                                                                                                                                                                                                                                              |   |                        |           |         |              |        |     |                 |       |         |              |         |   |              |       |
| 712 | <b>fent_length_min</b><br>Show the field ONLY if:<br>[fent_length_mx] = '1'                          | <b>Minimum length of use documented</b><br><i>Enter numerical value.</i>                                              | <b>text, Required</b>                                                                                                                                                                                                                                                                                                                             |   |                        |           |         |              |        |     |                 |       |         |              |         |   |              |       |
| 713 | <b>fent_length_avg</b><br>Show the field ONLY if:<br>[fent_length_mx] = '1'                          | <b>Average length of use</b>                                                                                          | <b>calc, Required</b><br>Calculation: mean([fent_length_max] , [fent_length_min])                                                                                                                                                                                                                                                                 |   |                        |           |         |              |        |     |                 |       |         |              |         |   |              |       |
| 714 | <b>fent_length_1</b><br>Show the field ONLY if:<br>[fent_length_mx] = '0'                            | <b>Length of use</b><br><i>If 5 years, enter "5." Enter "999" if unknown.</i>                                         | <b>text, Required</b>                                                                                                                                                                                                                                                                                                                             |   |                        |           |         |              |        |     |                 |       |         |              |         |   |              |       |
| 715 | <b>fent_length_2</b><br>Show the field ONLY if:<br>[fent(4)] = '1'                                   | <b>Unit of time</b><br><i>If 5 years, select "Years."</i>                                                             | <b>radio, Required</b><br><table border="1"> <tr><td>1</td><td>Days</td></tr> <tr><td>2</td><td>Weeks</td></tr> <tr><td>3</td><td>Months</td></tr> <tr><td>4</td><td>Years</td></tr> <tr><td>999</td><td>Unknown</td></tr> </table>                                                                                                               | 1 | Days                   | 2         | Weeks   | 3            | Months | 4   | Years           | 999   | Unknown |              |         |   |              |       |
| 1   | Days                                                                                                 |                                                                                                                       |                                                                                                                                                                                                                                                                                                                                                   |   |                        |           |         |              |        |     |                 |       |         |              |         |   |              |       |
| 2   | Weeks                                                                                                |                                                                                                                       |                                                                                                                                                                                                                                                                                                                                                   |   |                        |           |         |              |        |     |                 |       |         |              |         |   |              |       |
| 3   | Months                                                                                               |                                                                                                                       |                                                                                                                                                                                                                                                                                                                                                   |   |                        |           |         |              |        |     |                 |       |         |              |         |   |              |       |
| 4   | Years                                                                                                |                                                                                                                       |                                                                                                                                                                                                                                                                                                                                                   |   |                        |           |         |              |        |     |                 |       |         |              |         |   |              |       |
| 999 | Unknown                                                                                              |                                                                                                                       |                                                                                                                                                                                                                                                                                                                                                   |   |                        |           |         |              |        |     |                 |       |         |              |         |   |              |       |
| 716 | <b>fent_age</b><br>Show the field ONLY if:<br>[fent(5)] = '1'                                        | <b>Age of first use</b>                                                                                               | <b>text, Required</b>                                                                                                                                                                                                                                                                                                                             |   |                        |           |         |              |        |     |                 |       |         |              |         |   |              |       |
| 717 | <b>hm_use</b><br>Show the field ONLY if:<br>[primary_opioid] = '5' or<br>[curr_opioid_type(5)] = '1' | <b>Section Header: Current Hydromorphone Use</b><br><b>Is this use of hydromorphone prescribed, illicit, or both?</b> | <b>radio, Required</b><br><table border="1"> <tr><td>1</td><td>Prescribed</td></tr> <tr><td>2</td><td>Illicit</td></tr> <tr><td>3</td><td>Both</td></tr> <tr><td>999</td><td>Unknown/Unclear</td></tr> </table>                                                                                                                                   | 1 | Prescribed             | 2         | Illicit | 3            | Both   | 999 | Unknown/Unclear |       |         |              |         |   |              |       |
| 1   | Prescribed                                                                                           |                                                                                                                       |                                                                                                                                                                                                                                                                                                                                                   |   |                        |           |         |              |        |     |                 |       |         |              |         |   |              |       |
| 2   | Illicit                                                                                              |                                                                                                                       |                                                                                                                                                                                                                                                                                                                                                   |   |                        |           |         |              |        |     |                 |       |         |              |         |   |              |       |
| 3   | Both                                                                                                 |                                                                                                                       |                                                                                                                                                                                                                                                                                                                                                   |   |                        |           |         |              |        |     |                 |       |         |              |         |   |              |       |
| 999 | Unknown/Unclear                                                                                      |                                                                                                                       |                                                                                                                                                                                                                                                                                                                                                   |   |                        |           |         |              |        |     |                 |       |         |              |         |   |              |       |

|     |                                                                                       |                                                                                                                                                |                                                                                                                                                                                                                                                                                                    |   |                        |            |       |               |        |   |               |       |   |            |         |
|-----|---------------------------------------------------------------------------------------|------------------------------------------------------------------------------------------------------------------------------------------------|----------------------------------------------------------------------------------------------------------------------------------------------------------------------------------------------------------------------------------------------------------------------------------------------------|---|------------------------|------------|-------|---------------|--------|---|---------------|-------|---|------------|---------|
| 718 | <b>hm_amt_type</b><br><b>Show the field ONLY if:</b><br><b>[hm(1)] = '1'</b>          | <b>Hydromorphone amount type</b><br><i>if 10 grams, select "grams."</i>                                                                        | <b>checkbox, Required</b><br><table border="1"> <tr> <td>1</td> <td>hm_amt_type_1</td> <td>milligrams</td> </tr> <tr> <td>2</td> <td>hm_amt_type_2</td> <td>\$</td> </tr> <tr> <td>3</td> <td>hm_amt_type_3</td> <td>pills</td> </tr> </table>                                                     | 1 | hm_amt_type_1          | milligrams | 2     | hm_amt_type_2 | \$     | 3 | hm_amt_type_3 | pills |   |            |         |
| 1   | hm_amt_type_1                                                                         | milligrams                                                                                                                                     |                                                                                                                                                                                                                                                                                                    |   |                        |            |       |               |        |   |               |       |   |            |         |
| 2   | hm_amt_type_2                                                                         | \$                                                                                                                                             |                                                                                                                                                                                                                                                                                                    |   |                        |            |       |               |        |   |               |       |   |            |         |
| 3   | hm_amt_type_3                                                                         | pills                                                                                                                                          |                                                                                                                                                                                                                                                                                                    |   |                        |            |       |               |        |   |               |       |   |            |         |
| 719 | <b>hm_mg</b><br><b>Show the field ONLY if:</b><br><b>[hm_amt_type(1)] = '1'</b>       | <b>Maximum milligram amount of hydromorphone documented in the chart</b><br><i>Enter numerical value. Use decimal value if fraction given.</i> | <b>text, Required</b>                                                                                                                                                                                                                                                                              |   |                        |            |       |               |        |   |               |       |   |            |         |
| 720 | <b>hm_dollar</b><br><b>Show the field ONLY if:</b><br><b>[hm_amt_type(2)] = '1'</b>   | <b>Maximum dollar amount of hydromorphone documented in the chart</b><br><i>Enter numerical value.</i>                                         | <b>text, Required</b>                                                                                                                                                                                                                                                                              |   |                        |            |       |               |        |   |               |       |   |            |         |
| 721 | <b>hm_pills</b><br><b>Show the field ONLY if:</b><br><b>[hm_amt_type(3)] = '1'</b>    | <b>Maximum number of hydromorphone pills documented in the chart</b><br><i>Enter numerical value.</i>                                          | <b>text, Required</b>                                                                                                                                                                                                                                                                              |   |                        |            |       |               |        |   |               |       |   |            |         |
| 722 | <b>hm_route</b><br><b>Show the field ONLY if:</b><br><b>[hm(2)] = '1'</b>             | <b>Hydromorphone route of administration</b>                                                                                                   | <b>checkbox, Required</b><br><table border="1"> <tr> <td>1</td> <td>hm_route_1</td> <td>Injection</td> </tr> <tr> <td>2</td> <td>hm_route_2</td> <td>Snort</td> </tr> <tr> <td>3</td> <td>hm_route_3</td> <td>Smoke</td> </tr> <tr> <td>4</td> <td>hm_route_4</td> <td>Swallow</td> </tr> </table> | 1 | hm_route_1             | Injection  | 2     | hm_route_2    | Snort  | 3 | hm_route_3    | Smoke | 4 | hm_route_4 | Swallow |
| 1   | hm_route_1                                                                            | Injection                                                                                                                                      |                                                                                                                                                                                                                                                                                                    |   |                        |            |       |               |        |   |               |       |   |            |         |
| 2   | hm_route_2                                                                            | Snort                                                                                                                                          |                                                                                                                                                                                                                                                                                                    |   |                        |            |       |               |        |   |               |       |   |            |         |
| 3   | hm_route_3                                                                            | Smoke                                                                                                                                          |                                                                                                                                                                                                                                                                                                    |   |                        |            |       |               |        |   |               |       |   |            |         |
| 4   | hm_route_4                                                                            | Swallow                                                                                                                                        |                                                                                                                                                                                                                                                                                                    |   |                        |            |       |               |        |   |               |       |   |            |         |
| 723 | <b>hm_freq</b><br><b>Show the field ONLY if:</b><br><b>[hm(3)] = '1'</b>              | <b>Hydromorphone frequency</b>                                                                                                                 | <b>radio, Required</b><br><table border="1"> <tr> <td>1</td> <td>Multiple times per day</td> </tr> <tr> <td>2</td> <td>Daily</td> </tr> <tr> <td>3</td> <td>Weekly</td> </tr> <tr> <td>4</td> <td>Monthly</td> </tr> </table>                                                                      | 1 | Multiple times per day | 2          | Daily | 3             | Weekly | 4 | Monthly       |       |   |            |         |
| 1   | Multiple times per day                                                                |                                                                                                                                                |                                                                                                                                                                                                                                                                                                    |   |                        |            |       |               |        |   |               |       |   |            |         |
| 2   | Daily                                                                                 |                                                                                                                                                |                                                                                                                                                                                                                                                                                                    |   |                        |            |       |               |        |   |               |       |   |            |         |
| 3   | Weekly                                                                                |                                                                                                                                                |                                                                                                                                                                                                                                                                                                    |   |                        |            |       |               |        |   |               |       |   |            |         |
| 4   | Monthly                                                                               |                                                                                                                                                |                                                                                                                                                                                                                                                                                                    |   |                        |            |       |               |        |   |               |       |   |            |         |
| 724 | <b>hm_length_mx</b><br><b>Show the field ONLY if:</b><br><b>[hm(4)] = '1'</b>         | <b>Are there discrepant accounts for length of use of hydromorphone documented in the chart?</b>                                               | <b>yesno, Required</b><br><table border="1"> <tr> <td>1</td> <td>Yes</td> </tr> <tr> <td>0</td> <td>No</td> </tr> </table>                                                                                                                                                                         | 1 | Yes                    | 0          | No    |               |        |   |               |       |   |            |         |
| 1   | Yes                                                                                   |                                                                                                                                                |                                                                                                                                                                                                                                                                                                    |   |                        |            |       |               |        |   |               |       |   |            |         |
| 0   | No                                                                                    |                                                                                                                                                |                                                                                                                                                                                                                                                                                                    |   |                        |            |       |               |        |   |               |       |   |            |         |
| 725 | <b>hm_length_max</b><br><b>Show the field ONLY if:</b><br><b>[hm_length_mx] = '1'</b> | <b>Maximum length of use documented</b><br><i>Enter numerical value.</i>                                                                       | <b>text, Required</b>                                                                                                                                                                                                                                                                              |   |                        |            |       |               |        |   |               |       |   |            |         |
| 726 | <b>hm_length_min</b><br><b>Show the field ONLY if:</b><br><b>[hm_length_mx] = '1'</b> | <b>Minimum length of use documented</b><br><i>Enter numerical value.</i>                                                                       | <b>text, Required</b>                                                                                                                                                                                                                                                                              |   |                        |            |       |               |        |   |               |       |   |            |         |
| 727 | <b>hm_length_avg</b><br><b>Show the field ONLY if:</b><br><b>[hm_length_mx] = '1'</b> | <b>Average length of use</b>                                                                                                                   | <b>calc, Required</b><br><b>Calculation: mean([hm_length_max] , [hm_length_min])</b>                                                                                                                                                                                                               |   |                        |            |       |               |        |   |               |       |   |            |         |
| 728 | <b>hm_length_1</b><br><b>Show the field ONLY if:</b><br><b>[hm_length_mx] = '0'</b>   | <b>Length of use</b><br><i>If 5 years, enter "5." Enter "999" if unknown.</i>                                                                  | <b>text, Required</b>                                                                                                                                                                                                                                                                              |   |                        |            |       |               |        |   |               |       |   |            |         |

|     |                                                                                                     |                                                                                                                                           |                                                                                                                                                                                                                                                                                                                                                    |   |                        |            |         |                |        |     |                 |       |         |             |         |     |               |         |
|-----|-----------------------------------------------------------------------------------------------------|-------------------------------------------------------------------------------------------------------------------------------------------|----------------------------------------------------------------------------------------------------------------------------------------------------------------------------------------------------------------------------------------------------------------------------------------------------------------------------------------------------|---|------------------------|------------|---------|----------------|--------|-----|-----------------|-------|---------|-------------|---------|-----|---------------|---------|
| 729 | <b>hm_length_2</b><br>Show the field ONLY if:<br>[hm(4)] = '1'                                      | <b>Unit of time</b><br><i>If 5 years, select "Years."</i>                                                                                 | <b>radio, Required</b><br><table border="1"> <tr><td>1</td><td>Days</td></tr> <tr><td>2</td><td>Weeks</td></tr> <tr><td>3</td><td>Months</td></tr> <tr><td>4</td><td>Years</td></tr> <tr><td>999</td><td>Unknown</td></tr> </table>                                                                                                                | 1 | Days                   | 2          | Weeks   | 3              | Months | 4   | Years           | 999   | Unknown |             |         |     |               |         |
| 1   | Days                                                                                                |                                                                                                                                           |                                                                                                                                                                                                                                                                                                                                                    |   |                        |            |         |                |        |     |                 |       |         |             |         |     |               |         |
| 2   | Weeks                                                                                               |                                                                                                                                           |                                                                                                                                                                                                                                                                                                                                                    |   |                        |            |         |                |        |     |                 |       |         |             |         |     |               |         |
| 3   | Months                                                                                              |                                                                                                                                           |                                                                                                                                                                                                                                                                                                                                                    |   |                        |            |         |                |        |     |                 |       |         |             |         |     |               |         |
| 4   | Years                                                                                               |                                                                                                                                           |                                                                                                                                                                                                                                                                                                                                                    |   |                        |            |         |                |        |     |                 |       |         |             |         |     |               |         |
| 999 | Unknown                                                                                             |                                                                                                                                           |                                                                                                                                                                                                                                                                                                                                                    |   |                        |            |         |                |        |     |                 |       |         |             |         |     |               |         |
| 730 | <b>hm_age</b><br>Show the field ONLY if:<br>[hm(5)] = '1'                                           | <b>Age of first use</b>                                                                                                                   | <b>text, Required</b>                                                                                                                                                                                                                                                                                                                              |   |                        |            |         |                |        |     |                 |       |         |             |         |     |               |         |
| 731 | <b>mor_use</b><br>Show the field ONLY if:<br>[primary_opioid]='6' or<br>[curr_opioid_type(6)] = '1' | <b>Section Header: Current Morphine Use</b><br><b>Is this use of morphine prescribed, illicit, or both?</b>                               | <b>radio, Required</b><br><table border="1"> <tr><td>1</td><td>Prescribed</td></tr> <tr><td>2</td><td>Illicit</td></tr> <tr><td>3</td><td>Both</td></tr> <tr><td>999</td><td>Unknown/Unclear</td></tr> </table>                                                                                                                                    | 1 | Prescribed             | 2          | Illicit | 3              | Both   | 999 | Unknown/Unclear |       |         |             |         |     |               |         |
| 1   | Prescribed                                                                                          |                                                                                                                                           |                                                                                                                                                                                                                                                                                                                                                    |   |                        |            |         |                |        |     |                 |       |         |             |         |     |               |         |
| 2   | Illicit                                                                                             |                                                                                                                                           |                                                                                                                                                                                                                                                                                                                                                    |   |                        |            |         |                |        |     |                 |       |         |             |         |     |               |         |
| 3   | Both                                                                                                |                                                                                                                                           |                                                                                                                                                                                                                                                                                                                                                    |   |                        |            |         |                |        |     |                 |       |         |             |         |     |               |         |
| 999 | Unknown/Unclear                                                                                     |                                                                                                                                           |                                                                                                                                                                                                                                                                                                                                                    |   |                        |            |         |                |        |     |                 |       |         |             |         |     |               |         |
| 732 | <b>mor_amt_type</b><br>Show the field ONLY if:<br>[mor(1)] = '1'                                    | <b>Morphine amount type</b><br><i>if 10 grams, select "grams."</i>                                                                        | <b>checkbox, Required</b><br><table border="1"> <tr><td>1</td><td>mor_amt_type_1</td><td>milligrams</td></tr> <tr><td>2</td><td>mor_amt_type_2</td><td>\$</td></tr> <tr><td>3</td><td>mor_amt_type_3</td><td>pills</td></tr> </table>                                                                                                              | 1 | mor_amt_type_1         | milligrams | 2       | mor_amt_type_2 | \$     | 3   | mor_amt_type_3  | pills |         |             |         |     |               |         |
| 1   | mor_amt_type_1                                                                                      | milligrams                                                                                                                                |                                                                                                                                                                                                                                                                                                                                                    |   |                        |            |         |                |        |     |                 |       |         |             |         |     |               |         |
| 2   | mor_amt_type_2                                                                                      | \$                                                                                                                                        |                                                                                                                                                                                                                                                                                                                                                    |   |                        |            |         |                |        |     |                 |       |         |             |         |     |               |         |
| 3   | mor_amt_type_3                                                                                      | pills                                                                                                                                     |                                                                                                                                                                                                                                                                                                                                                    |   |                        |            |         |                |        |     |                 |       |         |             |         |     |               |         |
| 733 | <b>mor_mg</b><br>Show the field ONLY if:<br>[mor_amt_type(1)] = '1'                                 | <b>Maximum milligram amount of morphine documented in the chart</b><br><i>Enter numerical value. Use decimal value if fraction given.</i> | <b>text, Required</b>                                                                                                                                                                                                                                                                                                                              |   |                        |            |         |                |        |     |                 |       |         |             |         |     |               |         |
| 734 | <b>mor_dollar</b><br>Show the field ONLY if:<br>[mor_amt_type(2)] = '1'                             | <b>Maximum dollar amount of morphine documented in the chart</b><br><i>Enter numerical value.</i>                                         | <b>text, Required</b>                                                                                                                                                                                                                                                                                                                              |   |                        |            |         |                |        |     |                 |       |         |             |         |     |               |         |
| 735 | <b>mor_pills</b><br>Show the field ONLY if:<br>[mor_amt_type(3)] = '1'                              | <b>Maximum number of morphine pills documented in the chart</b><br><i>Enter numerical value.</i>                                          | <b>text, Required</b>                                                                                                                                                                                                                                                                                                                              |   |                        |            |         |                |        |     |                 |       |         |             |         |     |               |         |
| 736 | <b>mor_route</b><br>Show the field ONLY if:<br>[mor(2)] = '1'                                       | <b>Morphine route of administration</b>                                                                                                   | <b>checkbox, Required</b><br><table border="1"> <tr><td>1</td><td>mor_route_1</td><td>Injection</td></tr> <tr><td>2</td><td>mor_route_2</td><td>Snort</td></tr> <tr><td>3</td><td>mor_route_3</td><td>Smoke</td></tr> <tr><td>4</td><td>mor_route_4</td><td>Swallow</td></tr> <tr><td>999</td><td>mor_route_999</td><td>Unknown</td></tr> </table> | 1 | mor_route_1            | Injection  | 2       | mor_route_2    | Snort  | 3   | mor_route_3     | Smoke | 4       | mor_route_4 | Swallow | 999 | mor_route_999 | Unknown |
| 1   | mor_route_1                                                                                         | Injection                                                                                                                                 |                                                                                                                                                                                                                                                                                                                                                    |   |                        |            |         |                |        |     |                 |       |         |             |         |     |               |         |
| 2   | mor_route_2                                                                                         | Snort                                                                                                                                     |                                                                                                                                                                                                                                                                                                                                                    |   |                        |            |         |                |        |     |                 |       |         |             |         |     |               |         |
| 3   | mor_route_3                                                                                         | Smoke                                                                                                                                     |                                                                                                                                                                                                                                                                                                                                                    |   |                        |            |         |                |        |     |                 |       |         |             |         |     |               |         |
| 4   | mor_route_4                                                                                         | Swallow                                                                                                                                   |                                                                                                                                                                                                                                                                                                                                                    |   |                        |            |         |                |        |     |                 |       |         |             |         |     |               |         |
| 999 | mor_route_999                                                                                       | Unknown                                                                                                                                   |                                                                                                                                                                                                                                                                                                                                                    |   |                        |            |         |                |        |     |                 |       |         |             |         |     |               |         |
| 737 | <b>mor_freq</b><br>Show the field ONLY if:<br>[mor(3)] = '1'                                        | <b>Morphine frequency</b>                                                                                                                 | <b>radio, Required</b><br><table border="1"> <tr><td>1</td><td>Multiple times per day</td></tr> <tr><td>2</td><td>Daily</td></tr> <tr><td>3</td><td>Weekly</td></tr> <tr><td>4</td><td>Monthly</td></tr> <tr><td>999</td><td>Unknown</td></tr> </table>                                                                                            | 1 | Multiple times per day | 2          | Daily   | 3              | Weekly | 4   | Monthly         | 999   | Unknown |             |         |     |               |         |
| 1   | Multiple times per day                                                                              |                                                                                                                                           |                                                                                                                                                                                                                                                                                                                                                    |   |                        |            |         |                |        |     |                 |       |         |             |         |     |               |         |
| 2   | Daily                                                                                               |                                                                                                                                           |                                                                                                                                                                                                                                                                                                                                                    |   |                        |            |         |                |        |     |                 |       |         |             |         |     |               |         |
| 3   | Weekly                                                                                              |                                                                                                                                           |                                                                                                                                                                                                                                                                                                                                                    |   |                        |            |         |                |        |     |                 |       |         |             |         |     |               |         |
| 4   | Monthly                                                                                             |                                                                                                                                           |                                                                                                                                                                                                                                                                                                                                                    |   |                        |            |         |                |        |     |                 |       |         |             |         |     |               |         |
| 999 | Unknown                                                                                             |                                                                                                                                           |                                                                                                                                                                                                                                                                                                                                                    |   |                        |            |         |                |        |     |                 |       |         |             |         |     |               |         |

|     |                                                                                        |                                                                                                                                            |                                                                                                                                                                                                                                             |
|-----|----------------------------------------------------------------------------------------|--------------------------------------------------------------------------------------------------------------------------------------------|---------------------------------------------------------------------------------------------------------------------------------------------------------------------------------------------------------------------------------------------|
| 738 | <b>mor_length_mx</b><br>Show the field ONLY if:<br>[mor(4)] = '1'                      | <b>Are there discrepant accounts for length of use of morphine documented in the chart?</b>                                                | <b>yesno, Required</b><br>1 Yes<br>0 No                                                                                                                                                                                                     |
| 739 | <b>mor_length_max</b><br>Show the field ONLY if:<br>[mor_length_mx] = '1'              | <b>Maximum length of use documented</b><br><i>Enter numerical value.</i>                                                                   | <b>text, Required</b>                                                                                                                                                                                                                       |
| 740 | <b>mor_length_min</b><br>Show the field ONLY if:<br>[mor_length_mx] = '1'              | <b>Minimum length of use documented</b><br><i>Enter numerical value.</i>                                                                   | <b>text, Required</b>                                                                                                                                                                                                                       |
| 741 | <b>mor_length_avg</b><br>Show the field ONLY if:<br>[hm_length_mx] = '1'               | <b>Average length of use</b>                                                                                                               | <b>calc, Required</b><br>Calculation: mean([mor_length_max] , [mor_length_min])                                                                                                                                                             |
| 742 | <b>mor_length_1</b><br>Show the field ONLY if:<br>[mor_length_mx] = '0'                | <b>Length of use</b><br><i>If 5 years, enter "5." Enter "999" if unknown.</i>                                                              | <b>text, Required</b>                                                                                                                                                                                                                       |
| 743 | <b>mor_length_2</b><br>Show the field ONLY if:<br>[mor(4)] = '1'                       | <b>Unit of time</b><br><i>If 5 years, select "Years."</i>                                                                                  | <b>radio, Required</b><br>1 Days<br>2 Weeks<br>3 Months<br>4 Years<br>999 Unknown                                                                                                                                                           |
| 744 | <b>mor_age</b><br>Show the field ONLY if:<br>[mor(5)] = '1'                            | <b>Age of first use</b>                                                                                                                    | <b>text, Required</b>                                                                                                                                                                                                                       |
| 745 | <b>oth_primary_use</b><br>Show the field ONLY if:<br>[primary_opioid] = '7'            | <b>Section Header:</b> <i>Current [primary_opioid_oth] Use</i><br><b>Is this use of [primary_opioid_oth] prescribed, illicit, or both?</b> | <b>radio, Required</b><br>1 Prescribed<br>2 Illicit<br>3 Both<br>999 Unknown/Unclear                                                                                                                                                        |
| 746 | <b>oth_primary_amt_type</b><br>Show the field ONLY if:<br>[oth_primary(1)] = '1'       | <b>Amount Type</b><br><i>if 10 grams, select "grams."</i>                                                                                  | <b>checkbox, Required</b><br>1 oth_primary_amt_type_1 grams<br>2 oth_primary_amt_type_2 \$<br>3 oth_primary_amt_type_3 bags<br>4 oth_primary_amt_type_4 pills<br>5 oth_primary_amt_type_5 milligrams<br>6 oth_primary_amt_type_6 micrograms |
| 747 | <b>oth_primary_gram</b><br>Show the field ONLY if:<br>[oth_primary_amt_type (1)] = '1' | <b>Maximum gram amount documented in the chart</b><br><i>Enter numerical value.</i>                                                        | <b>text, Required</b>                                                                                                                                                                                                                       |



|     |                                                                                            |                                                                                                                               |                                                                                                                                                                                                                                                                                                                                        |   |                        |           |       |                     |        |   |                     |       |         |                     |         |
|-----|--------------------------------------------------------------------------------------------|-------------------------------------------------------------------------------------------------------------------------------|----------------------------------------------------------------------------------------------------------------------------------------------------------------------------------------------------------------------------------------------------------------------------------------------------------------------------------------|---|------------------------|-----------|-------|---------------------|--------|---|---------------------|-------|---------|---------------------|---------|
| 748 | <b>oth_primary_dollar</b><br>Show the field ONLY if:<br>[oth_primary_amt_type (2)] = '1'   | <b>Maximum dollar amount documented in the chart</b><br><i>Enter numerical value.</i>                                         | <b>text, Required</b>                                                                                                                                                                                                                                                                                                                  |   |                        |           |       |                     |        |   |                     |       |         |                     |         |
| 749 | <b>oth_primary_bag</b><br>Show the field ONLY if:<br>[oth_primary_amt_type (3)] = '1'      | <b>Maximum bag amount documented in the chart</b><br><i>Enter numerical value.</i>                                            | <b>text, Required</b>                                                                                                                                                                                                                                                                                                                  |   |                        |           |       |                     |        |   |                     |       |         |                     |         |
| 750 | <b>oth_primary_pills</b><br>Show the field ONLY if:<br>[oth_primary_amt_type (4)] = '1'    | <b>Maximum number of pills documented in the chart</b><br><i>Enter numerical value.</i>                                       | <b>text, Required</b>                                                                                                                                                                                                                                                                                                                  |   |                        |           |       |                     |        |   |                     |       |         |                     |         |
| 751 | <b>oth_primary_mg</b><br>Show the field ONLY if:<br>[oth_primary_amt_type (5)] = '1'       | <b>Maximum milligram amount documented in the chart</b><br><i>Enter numerical value. Use decimal value if fraction given.</i> | <b>text, Required</b>                                                                                                                                                                                                                                                                                                                  |   |                        |           |       |                     |        |   |                     |       |         |                     |         |
| 752 | <b>oth_primary_mcg</b><br>Show the field ONLY if:<br>[oth_primary_amt_type (6)] = '1'      | <b>Maximum microgram amount documented in the chart</b><br><i>Enter numerical value. Use decimal value if fraction given.</i> | <b>text, Required</b>                                                                                                                                                                                                                                                                                                                  |   |                        |           |       |                     |        |   |                     |       |         |                     |         |
| 753 | <b>oth_primary_route</b><br>Show the field ONLY if:<br>[oth_primary(2)] = '1'              | <b>Route of administration</b>                                                                                                | <b>checkbox, Required</b><br><table border="1"> <tr> <td>1</td> <td>oth_primary_route_1</td> <td>Injection</td> </tr> <tr> <td>2</td> <td>oth_primary_route_2</td> <td>Snort</td> </tr> <tr> <td>3</td> <td>oth_primary_route_3</td> <td>Smoke</td> </tr> <tr> <td>4</td> <td>oth_primary_route_4</td> <td>Swallow</td> </tr> </table> | 1 | oth_primary_route_1    | Injection | 2     | oth_primary_route_2 | Snort  | 3 | oth_primary_route_3 | Smoke | 4       | oth_primary_route_4 | Swallow |
| 1   | oth_primary_route_1                                                                        | Injection                                                                                                                     |                                                                                                                                                                                                                                                                                                                                        |   |                        |           |       |                     |        |   |                     |       |         |                     |         |
| 2   | oth_primary_route_2                                                                        | Snort                                                                                                                         |                                                                                                                                                                                                                                                                                                                                        |   |                        |           |       |                     |        |   |                     |       |         |                     |         |
| 3   | oth_primary_route_3                                                                        | Smoke                                                                                                                         |                                                                                                                                                                                                                                                                                                                                        |   |                        |           |       |                     |        |   |                     |       |         |                     |         |
| 4   | oth_primary_route_4                                                                        | Swallow                                                                                                                       |                                                                                                                                                                                                                                                                                                                                        |   |                        |           |       |                     |        |   |                     |       |         |                     |         |
| 754 | <b>oth_primary_freq</b><br>Show the field ONLY if:<br>[oth_primary(3)] = '1'               | <b>Frequency</b>                                                                                                              | <b>radio, Required</b><br><table border="1"> <tr> <td>1</td> <td>Multiple times per day</td> </tr> <tr> <td>2</td> <td>Daily</td> </tr> <tr> <td>3</td> <td>Weekly</td> </tr> <tr> <td>4</td> <td>Monthly</td> </tr> <tr> <td>999</td> <td>Unknown</td> </tr> </table>                                                                 | 1 | Multiple times per day | 2         | Daily | 3                   | Weekly | 4 | Monthly             | 999   | Unknown |                     |         |
| 1   | Multiple times per day                                                                     |                                                                                                                               |                                                                                                                                                                                                                                                                                                                                        |   |                        |           |       |                     |        |   |                     |       |         |                     |         |
| 2   | Daily                                                                                      |                                                                                                                               |                                                                                                                                                                                                                                                                                                                                        |   |                        |           |       |                     |        |   |                     |       |         |                     |         |
| 3   | Weekly                                                                                     |                                                                                                                               |                                                                                                                                                                                                                                                                                                                                        |   |                        |           |       |                     |        |   |                     |       |         |                     |         |
| 4   | Monthly                                                                                    |                                                                                                                               |                                                                                                                                                                                                                                                                                                                                        |   |                        |           |       |                     |        |   |                     |       |         |                     |         |
| 999 | Unknown                                                                                    |                                                                                                                               |                                                                                                                                                                                                                                                                                                                                        |   |                        |           |       |                     |        |   |                     |       |         |                     |         |
| 755 | <b>oth_primary_length_mx</b><br>Show the field ONLY if:<br>[oth_primary(4)] = '1'          | <b>Are there discrepant accounts for length of use of [primary_opioid_oth] documented in the chart?</b>                       | <b>yesno, Required</b><br><table border="1"> <tr> <td>1</td> <td>Yes</td> </tr> <tr> <td>0</td> <td>No</td> </tr> </table>                                                                                                                                                                                                             | 1 | Yes                    | 0         | No    |                     |        |   |                     |       |         |                     |         |
| 1   | Yes                                                                                        |                                                                                                                               |                                                                                                                                                                                                                                                                                                                                        |   |                        |           |       |                     |        |   |                     |       |         |                     |         |
| 0   | No                                                                                         |                                                                                                                               |                                                                                                                                                                                                                                                                                                                                        |   |                        |           |       |                     |        |   |                     |       |         |                     |         |
| 756 | <b>oth_primary_length_max</b><br>Show the field ONLY if:<br>[oth_primary_length_max] = '1' | <b>Maximum length of use documented</b><br><i>Enter numerical value.</i>                                                      | <b>text, Required</b>                                                                                                                                                                                                                                                                                                                  |   |                        |           |       |                     |        |   |                     |       |         |                     |         |
| 757 | <b>oth_primary_length_min</b><br>Show the field ONLY if:<br>[oth_primary_length_min] = '1' | <b>Minimum length of use documented</b><br><i>Enter numerical value.</i>                                                      | <b>text, Required</b>                                                                                                                                                                                                                                                                                                                  |   |                        |           |       |                     |        |   |                     |       |         |                     |         |

|     |                                                                                            |                                                                                                                                      |                                                                                                                                                                                                                                                                                                                                                                                                                                                   |   |                      |       |         |                      |        |     |                      |      |         |                      |       |   |                      |            |   |                      |            |
|-----|--------------------------------------------------------------------------------------------|--------------------------------------------------------------------------------------------------------------------------------------|---------------------------------------------------------------------------------------------------------------------------------------------------------------------------------------------------------------------------------------------------------------------------------------------------------------------------------------------------------------------------------------------------------------------------------------------------|---|----------------------|-------|---------|----------------------|--------|-----|----------------------|------|---------|----------------------|-------|---|----------------------|------------|---|----------------------|------------|
| 758 | <b>oth_primary_length_avg</b><br>Show the field ONLY if:<br>[oth_primary_length_max] = '1' | <b>Average length of use</b>                                                                                                         | calc, Required<br>Calculation:<br>mean([oth_primary_length_max] ,<br>[oth_primary_length_min])                                                                                                                                                                                                                                                                                                                                                    |   |                      |       |         |                      |        |     |                      |      |         |                      |       |   |                      |            |   |                      |            |
| 759 | <b>oth_primary_length_1</b><br>Show the field ONLY if:<br>[oth_primary_length_max] = '0'   | <b>Length of use</b><br><i>If 5 years, enter "5." Enter "999" if unknown.</i>                                                        | text, Required                                                                                                                                                                                                                                                                                                                                                                                                                                    |   |                      |       |         |                      |        |     |                      |      |         |                      |       |   |                      |            |   |                      |            |
| 760 | <b>oth_primary_length_2</b><br>Show the field ONLY if:<br>[oth_primary(4)] = '1'           | <b>Unit of time</b><br><i>If 5 years, select "Years."</i>                                                                            | radio, Required<br><table border="1"> <tr><td>1</td><td>Days</td></tr> <tr><td>2</td><td>Weeks</td></tr> <tr><td>3</td><td>Months</td></tr> <tr><td>4</td><td>Years</td></tr> <tr><td>999</td><td>Unknown</td></tr> </table>                                                                                                                                                                                                                      | 1 | Days                 | 2     | Weeks   | 3                    | Months | 4   | Years                | 999  | Unknown |                      |       |   |                      |            |   |                      |            |
| 1   | Days                                                                                       |                                                                                                                                      |                                                                                                                                                                                                                                                                                                                                                                                                                                                   |   |                      |       |         |                      |        |     |                      |      |         |                      |       |   |                      |            |   |                      |            |
| 2   | Weeks                                                                                      |                                                                                                                                      |                                                                                                                                                                                                                                                                                                                                                                                                                                                   |   |                      |       |         |                      |        |     |                      |      |         |                      |       |   |                      |            |   |                      |            |
| 3   | Months                                                                                     |                                                                                                                                      |                                                                                                                                                                                                                                                                                                                                                                                                                                                   |   |                      |       |         |                      |        |     |                      |      |         |                      |       |   |                      |            |   |                      |            |
| 4   | Years                                                                                      |                                                                                                                                      |                                                                                                                                                                                                                                                                                                                                                                                                                                                   |   |                      |       |         |                      |        |     |                      |      |         |                      |       |   |                      |            |   |                      |            |
| 999 | Unknown                                                                                    |                                                                                                                                      |                                                                                                                                                                                                                                                                                                                                                                                                                                                   |   |                      |       |         |                      |        |     |                      |      |         |                      |       |   |                      |            |   |                      |            |
| 761 | <b>oth_primary_age</b><br>Show the field ONLY if:<br>[oth_primary(5)] = '1'                | <b>Age of first use</b>                                                                                                              | text, Required                                                                                                                                                                                                                                                                                                                                                                                                                                    |   |                      |       |         |                      |        |     |                      |      |         |                      |       |   |                      |            |   |                      |            |
| 762 | <b>oth_other_use</b><br>Show the field ONLY if:<br>[curr_opioid_type(7)] = '1'             | <b>Section Header:</b> <i>Current [curr_opioid_oth] Use</i><br><b>Is this use of [curr_opioid_oth] prescribed, illicit, or both?</b> | radio, Required<br><table border="1"> <tr><td>1</td><td>Prescribed</td></tr> <tr><td>2</td><td>Illicit</td></tr> <tr><td>3</td><td>Both</td></tr> <tr><td>999</td><td>Unknown/Unclear</td></tr> </table>                                                                                                                                                                                                                                          | 1 | Prescribed           | 2     | Illicit | 3                    | Both   | 999 | Unknown/Unclear      |      |         |                      |       |   |                      |            |   |                      |            |
| 1   | Prescribed                                                                                 |                                                                                                                                      |                                                                                                                                                                                                                                                                                                                                                                                                                                                   |   |                      |       |         |                      |        |     |                      |      |         |                      |       |   |                      |            |   |                      |            |
| 2   | Illicit                                                                                    |                                                                                                                                      |                                                                                                                                                                                                                                                                                                                                                                                                                                                   |   |                      |       |         |                      |        |     |                      |      |         |                      |       |   |                      |            |   |                      |            |
| 3   | Both                                                                                       |                                                                                                                                      |                                                                                                                                                                                                                                                                                                                                                                                                                                                   |   |                      |       |         |                      |        |     |                      |      |         |                      |       |   |                      |            |   |                      |            |
| 999 | Unknown/Unclear                                                                            |                                                                                                                                      |                                                                                                                                                                                                                                                                                                                                                                                                                                                   |   |                      |       |         |                      |        |     |                      |      |         |                      |       |   |                      |            |   |                      |            |
| 763 | <b>oth_other_amt_type</b><br>Show the field ONLY if:<br>[oth_other(1)] = '1'               | <b>Amount Type</b><br><i>if 10 grams, select "grams."</i>                                                                            | checkbox, Required<br><table border="1"> <tr><td>1</td><td>oth_other_amt_type_1</td><td>grams</td></tr> <tr><td>2</td><td>oth_other_amt_type_2</td><td>\$</td></tr> <tr><td>3</td><td>oth_other_amt_type_3</td><td>bags</td></tr> <tr><td>4</td><td>oth_other_amt_type_4</td><td>pills</td></tr> <tr><td>5</td><td>oth_other_amt_type_5</td><td>milligrams</td></tr> <tr><td>6</td><td>oth_other_amt_type_6</td><td>micrograms</td></tr> </table> | 1 | oth_other_amt_type_1 | grams | 2       | oth_other_amt_type_2 | \$     | 3   | oth_other_amt_type_3 | bags | 4       | oth_other_amt_type_4 | pills | 5 | oth_other_amt_type_5 | milligrams | 6 | oth_other_amt_type_6 | micrograms |
| 1   | oth_other_amt_type_1                                                                       | grams                                                                                                                                |                                                                                                                                                                                                                                                                                                                                                                                                                                                   |   |                      |       |         |                      |        |     |                      |      |         |                      |       |   |                      |            |   |                      |            |
| 2   | oth_other_amt_type_2                                                                       | \$                                                                                                                                   |                                                                                                                                                                                                                                                                                                                                                                                                                                                   |   |                      |       |         |                      |        |     |                      |      |         |                      |       |   |                      |            |   |                      |            |
| 3   | oth_other_amt_type_3                                                                       | bags                                                                                                                                 |                                                                                                                                                                                                                                                                                                                                                                                                                                                   |   |                      |       |         |                      |        |     |                      |      |         |                      |       |   |                      |            |   |                      |            |
| 4   | oth_other_amt_type_4                                                                       | pills                                                                                                                                |                                                                                                                                                                                                                                                                                                                                                                                                                                                   |   |                      |       |         |                      |        |     |                      |      |         |                      |       |   |                      |            |   |                      |            |
| 5   | oth_other_amt_type_5                                                                       | milligrams                                                                                                                           |                                                                                                                                                                                                                                                                                                                                                                                                                                                   |   |                      |       |         |                      |        |     |                      |      |         |                      |       |   |                      |            |   |                      |            |
| 6   | oth_other_amt_type_6                                                                       | micrograms                                                                                                                           |                                                                                                                                                                                                                                                                                                                                                                                                                                                   |   |                      |       |         |                      |        |     |                      |      |         |                      |       |   |                      |            |   |                      |            |
| 764 | <b>oth_other_gram</b><br>Show the field ONLY if:<br>[oth_other_amt_type(1)] = '1'          | <b>Maximum gram amount documented in the chart</b><br><i>Enter numerical value.</i>                                                  | text, Required                                                                                                                                                                                                                                                                                                                                                                                                                                    |   |                      |       |         |                      |        |     |                      |      |         |                      |       |   |                      |            |   |                      |            |
| 765 | <b>oth_other_dollar</b><br>Show the field ONLY if:<br>[oth_other_amt_type(2)] = '1'        | <b>Maximum dollar amount documented in the chart</b><br><i>Enter numerical value.</i>                                                | text, Required                                                                                                                                                                                                                                                                                                                                                                                                                                    |   |                      |       |         |                      |        |     |                      |      |         |                      |       |   |                      |            |   |                      |            |
| 766 | <b>oth_other_bag</b><br>Show the field ONLY if:<br>[oth_other_amt_type(3)] = '1'           | <b>Maximum bag amount documented in the chart</b><br><i>Enter numerical value.</i>                                                   | text, Required                                                                                                                                                                                                                                                                                                                                                                                                                                    |   |                      |       |         |                      |        |     |                      |      |         |                      |       |   |                      |            |   |                      |            |

|     |                                                                                       |                                                                                                                               |                                                                                                                                                                                                                                                                                                                                |   |                        |           |       |                   |        |   |                   |       |         |                   |         |
|-----|---------------------------------------------------------------------------------------|-------------------------------------------------------------------------------------------------------------------------------|--------------------------------------------------------------------------------------------------------------------------------------------------------------------------------------------------------------------------------------------------------------------------------------------------------------------------------|---|------------------------|-----------|-------|-------------------|--------|---|-------------------|-------|---------|-------------------|---------|
| 767 | <b>oth_other_pills</b><br>Show the field ONLY if:<br>[oth_other_amt_type(4)] = '1'    | <b>Maximum number of pills documented in the chart</b><br><i>Enter numerical value.</i>                                       | <b>text, Required</b>                                                                                                                                                                                                                                                                                                          |   |                        |           |       |                   |        |   |                   |       |         |                   |         |
| 768 | <b>oth_other_mg</b><br>Show the field ONLY if:<br>[oth_other_amt_type(5)] = '1'       | <b>Maximum milligram amount documented in the chart</b><br><i>Enter numerical value. Use decimal value if fraction given.</i> | <b>text, Required</b>                                                                                                                                                                                                                                                                                                          |   |                        |           |       |                   |        |   |                   |       |         |                   |         |
| 769 | <b>oth_other_mcg</b><br>Show the field ONLY if:<br>[oth_other_amt_type(6)] = '1'      | <b>Maximum microgram amount documented in the chart</b><br><i>Enter numerical value. Use decimal value if fraction given.</i> | <b>text, Required</b>                                                                                                                                                                                                                                                                                                          |   |                        |           |       |                   |        |   |                   |       |         |                   |         |
| 770 | <b>oth_other_route</b><br>Show the field ONLY if:<br>[oth_other(2)] = '1'             | <b>Route of administration</b>                                                                                                | <b>checkbox, Required</b><br><table border="1"> <tr> <td>1</td> <td>oth_other_route_1</td> <td>Injection</td> </tr> <tr> <td>2</td> <td>oth_other_route_2</td> <td>Snort</td> </tr> <tr> <td>3</td> <td>oth_other_route_3</td> <td>Smoke</td> </tr> <tr> <td>4</td> <td>oth_other_route_4</td> <td>Swallow</td> </tr> </table> | 1 | oth_other_route_1      | Injection | 2     | oth_other_route_2 | Snort  | 3 | oth_other_route_3 | Smoke | 4       | oth_other_route_4 | Swallow |
| 1   | oth_other_route_1                                                                     | Injection                                                                                                                     |                                                                                                                                                                                                                                                                                                                                |   |                        |           |       |                   |        |   |                   |       |         |                   |         |
| 2   | oth_other_route_2                                                                     | Snort                                                                                                                         |                                                                                                                                                                                                                                                                                                                                |   |                        |           |       |                   |        |   |                   |       |         |                   |         |
| 3   | oth_other_route_3                                                                     | Smoke                                                                                                                         |                                                                                                                                                                                                                                                                                                                                |   |                        |           |       |                   |        |   |                   |       |         |                   |         |
| 4   | oth_other_route_4                                                                     | Swallow                                                                                                                       |                                                                                                                                                                                                                                                                                                                                |   |                        |           |       |                   |        |   |                   |       |         |                   |         |
| 771 | <b>oth_other_freq</b><br>Show the field ONLY if:<br>[oth_other(3)] = '1'              | <b>Frequency</b>                                                                                                              | <b>radio, Required</b><br><table border="1"> <tr> <td>1</td> <td>Multiple times per day</td> </tr> <tr> <td>2</td> <td>Daily</td> </tr> <tr> <td>3</td> <td>Weekly</td> </tr> <tr> <td>4</td> <td>Monthly</td> </tr> <tr> <td>999</td> <td>Unknown</td> </tr> </table>                                                         | 1 | Multiple times per day | 2         | Daily | 3                 | Weekly | 4 | Monthly           | 999   | Unknown |                   |         |
| 1   | Multiple times per day                                                                |                                                                                                                               |                                                                                                                                                                                                                                                                                                                                |   |                        |           |       |                   |        |   |                   |       |         |                   |         |
| 2   | Daily                                                                                 |                                                                                                                               |                                                                                                                                                                                                                                                                                                                                |   |                        |           |       |                   |        |   |                   |       |         |                   |         |
| 3   | Weekly                                                                                |                                                                                                                               |                                                                                                                                                                                                                                                                                                                                |   |                        |           |       |                   |        |   |                   |       |         |                   |         |
| 4   | Monthly                                                                               |                                                                                                                               |                                                                                                                                                                                                                                                                                                                                |   |                        |           |       |                   |        |   |                   |       |         |                   |         |
| 999 | Unknown                                                                               |                                                                                                                               |                                                                                                                                                                                                                                                                                                                                |   |                        |           |       |                   |        |   |                   |       |         |                   |         |
| 772 | <b>oth_other_length_mx</b><br>Show the field ONLY if:<br>[oth_other(4)] = '1'         | <b>Are there discrepant accounts for length of use of [curr_opioid_oth] documented in the chart?</b>                          | <b>yesno, Required</b><br><table border="1"> <tr> <td>1</td> <td>Yes</td> </tr> <tr> <td>0</td> <td>No</td> </tr> </table>                                                                                                                                                                                                     | 1 | Yes                    | 0         | No    |                   |        |   |                   |       |         |                   |         |
| 1   | Yes                                                                                   |                                                                                                                               |                                                                                                                                                                                                                                                                                                                                |   |                        |           |       |                   |        |   |                   |       |         |                   |         |
| 0   | No                                                                                    |                                                                                                                               |                                                                                                                                                                                                                                                                                                                                |   |                        |           |       |                   |        |   |                   |       |         |                   |         |
| 773 | <b>oth_other_length_max</b><br>Show the field ONLY if:<br>[oth_other_length_mx] = '1' | <b>Maximum length of use documented</b><br><i>Enter numerical value.</i>                                                      | <b>text, Required</b>                                                                                                                                                                                                                                                                                                          |   |                        |           |       |                   |        |   |                   |       |         |                   |         |
| 774 | <b>oth_other_length_min</b><br>Show the field ONLY if:<br>[oth_other_length_mx] = '1' | <b>Minimum length of use documented</b><br><i>Enter numerical value.</i>                                                      | <b>text, Required</b>                                                                                                                                                                                                                                                                                                          |   |                        |           |       |                   |        |   |                   |       |         |                   |         |
| 775 | <b>oth_other_length_avg</b><br>Show the field ONLY if:<br>[oth_other_length_mx] = '1' | <b>Average length of use</b>                                                                                                  | <b>calc, Required</b><br>Calculation: mean([oth_other_length_max], [oth_other_length_min])                                                                                                                                                                                                                                     |   |                        |           |       |                   |        |   |                   |       |         |                   |         |
| 776 | <b>oth_other_length_1</b><br>Show the field ONLY if:<br>[oth_other_length_mx] = '0'   | <b>Length of use</b><br><i>If 5 years, enter "5." Enter "999" if unknown.</i>                                                 | <b>text, Required</b>                                                                                                                                                                                                                                                                                                          |   |                        |           |       |                   |        |   |                   |       |         |                   |         |

|     |                                                                                                 |                                                                                                                                   |                                                                                                                                                                                                                                                                                                                                                                                                                                                                                                                                                                                                                                                                                                                                                                                                                                                                                                                                    |   |                     |                                                   |       |                     |                                    |   |                     |                              |         |                     |                          |   |                     |           |   |                     |                                |   |                     |          |   |                     |        |   |                     |       |     |                       |         |
|-----|-------------------------------------------------------------------------------------------------|-----------------------------------------------------------------------------------------------------------------------------------|------------------------------------------------------------------------------------------------------------------------------------------------------------------------------------------------------------------------------------------------------------------------------------------------------------------------------------------------------------------------------------------------------------------------------------------------------------------------------------------------------------------------------------------------------------------------------------------------------------------------------------------------------------------------------------------------------------------------------------------------------------------------------------------------------------------------------------------------------------------------------------------------------------------------------------|---|---------------------|---------------------------------------------------|-------|---------------------|------------------------------------|---|---------------------|------------------------------|---------|---------------------|--------------------------|---|---------------------|-----------|---|---------------------|--------------------------------|---|---------------------|----------|---|---------------------|--------|---|---------------------|-------|-----|-----------------------|---------|
| 777 | <b>oth_other_length_2</b><br><b>Show the field ONLY if:</b><br><b>[oth_other(4)] = '1'</b>      | <b>Unit of time</b><br><i>If 5 years, select "Years."</i>                                                                         | <b>radio, Required</b> <table border="1" data-bbox="1047 113 1235 352"> <tr> <td>1</td> <td>Days</td> </tr> <tr> <td>2</td> <td>Weeks</td> </tr> <tr> <td>3</td> <td>Months</td> </tr> <tr> <td>4</td> <td>Years</td> </tr> <tr> <td>999</td> <td>Unknown</td> </tr> </table>                                                                                                                                                                                                                                                                                                                                                                                                                                                                                                                                                                                                                                                      | 1 | Days                | 2                                                 | Weeks | 3                   | Months                             | 4 | Years               | 999                          | Unknown |                     |                          |   |                     |           |   |                     |                                |   |                     |          |   |                     |        |   |                     |       |     |                       |         |
| 1   | Days                                                                                            |                                                                                                                                   |                                                                                                                                                                                                                                                                                                                                                                                                                                                                                                                                                                                                                                                                                                                                                                                                                                                                                                                                    |   |                     |                                                   |       |                     |                                    |   |                     |                              |         |                     |                          |   |                     |           |   |                     |                                |   |                     |          |   |                     |        |   |                     |       |     |                       |         |
| 2   | Weeks                                                                                           |                                                                                                                                   |                                                                                                                                                                                                                                                                                                                                                                                                                                                                                                                                                                                                                                                                                                                                                                                                                                                                                                                                    |   |                     |                                                   |       |                     |                                    |   |                     |                              |         |                     |                          |   |                     |           |   |                     |                                |   |                     |          |   |                     |        |   |                     |       |     |                       |         |
| 3   | Months                                                                                          |                                                                                                                                   |                                                                                                                                                                                                                                                                                                                                                                                                                                                                                                                                                                                                                                                                                                                                                                                                                                                                                                                                    |   |                     |                                                   |       |                     |                                    |   |                     |                              |         |                     |                          |   |                     |           |   |                     |                                |   |                     |          |   |                     |        |   |                     |       |     |                       |         |
| 4   | Years                                                                                           |                                                                                                                                   |                                                                                                                                                                                                                                                                                                                                                                                                                                                                                                                                                                                                                                                                                                                                                                                                                                                                                                                                    |   |                     |                                                   |       |                     |                                    |   |                     |                              |         |                     |                          |   |                     |           |   |                     |                                |   |                     |          |   |                     |        |   |                     |       |     |                       |         |
| 999 | Unknown                                                                                         |                                                                                                                                   |                                                                                                                                                                                                                                                                                                                                                                                                                                                                                                                                                                                                                                                                                                                                                                                                                                                                                                                                    |   |                     |                                                   |       |                     |                                    |   |                     |                              |         |                     |                          |   |                     |           |   |                     |                                |   |                     |          |   |                     |        |   |                     |       |     |                       |         |
| 778 | <b>oth_other_age</b><br><b>Show the field ONLY if:</b><br><b>[oth_other(5)] = '1'</b>           | <b>Age of first use</b>                                                                                                           | <b>text, Required</b>                                                                                                                                                                                                                                                                                                                                                                                                                                                                                                                                                                                                                                                                                                                                                                                                                                                                                                              |   |                     |                                                   |       |                     |                                    |   |                     |                              |         |                     |                          |   |                     |           |   |                     |                                |   |                     |          |   |                     |        |   |                     |       |     |                       |         |
| 779 | <b>first_opioid_age</b>                                                                         | <b>Section Header:</b> <i>Substance Use History ****</i><br><b>Age of first opioid exposure?</b><br><i>Enter "999" if unknown</i> | <b>text, Required</b>                                                                                                                                                                                                                                                                                                                                                                                                                                                                                                                                                                                                                                                                                                                                                                                                                                                                                                              |   |                     |                                                   |       |                     |                                    |   |                     |                              |         |                     |                          |   |                     |           |   |                     |                                |   |                     |          |   |                     |        |   |                     |       |     |                       |         |
| 780 | <b>first_opioid_type</b>                                                                        | <b>Opioid(s) first used?</b><br><i>Brand names listed in parantheses</i>                                                          | <b>checkbox, Required</b> <table border="1" data-bbox="1047 644 1534 1440"> <tr> <td>1</td> <td>first_opioid_type_1</td> <td>Oxycodone (OxyContin, Percocet, Roxicodone, etc.)</td> </tr> <tr> <td>2</td> <td>first_opioid_type_2</td> <td>Hydrocodone (Norco, Vicodin, etc.)</td> </tr> <tr> <td>3</td> <td>first_opioid_type_3</td> <td>Fentanyl (Duragesic, Ionsys)</td> </tr> <tr> <td>4</td> <td>first_opioid_type_4</td> <td>Hydromorphone (Dilaudid)</td> </tr> <tr> <td>5</td> <td>first_opioid_type_5</td> <td>Methadone</td> </tr> <tr> <td>6</td> <td>first_opioid_type_6</td> <td>Buprenorphine (Suboxone, etc.)</td> </tr> <tr> <td>7</td> <td>first_opioid_type_7</td> <td>Morphine</td> </tr> <tr> <td>8</td> <td>first_opioid_type_8</td> <td>Heroin</td> </tr> <tr> <td>9</td> <td>first_opioid_type_9</td> <td>Other</td> </tr> <tr> <td>999</td> <td>first_opioid_type_999</td> <td>Unknown</td> </tr> </table> | 1 | first_opioid_type_1 | Oxycodone (OxyContin, Percocet, Roxicodone, etc.) | 2     | first_opioid_type_2 | Hydrocodone (Norco, Vicodin, etc.) | 3 | first_opioid_type_3 | Fentanyl (Duragesic, Ionsys) | 4       | first_opioid_type_4 | Hydromorphone (Dilaudid) | 5 | first_opioid_type_5 | Methadone | 6 | first_opioid_type_6 | Buprenorphine (Suboxone, etc.) | 7 | first_opioid_type_7 | Morphine | 8 | first_opioid_type_8 | Heroin | 9 | first_opioid_type_9 | Other | 999 | first_opioid_type_999 | Unknown |
| 1   | first_opioid_type_1                                                                             | Oxycodone (OxyContin, Percocet, Roxicodone, etc.)                                                                                 |                                                                                                                                                                                                                                                                                                                                                                                                                                                                                                                                                                                                                                                                                                                                                                                                                                                                                                                                    |   |                     |                                                   |       |                     |                                    |   |                     |                              |         |                     |                          |   |                     |           |   |                     |                                |   |                     |          |   |                     |        |   |                     |       |     |                       |         |
| 2   | first_opioid_type_2                                                                             | Hydrocodone (Norco, Vicodin, etc.)                                                                                                |                                                                                                                                                                                                                                                                                                                                                                                                                                                                                                                                                                                                                                                                                                                                                                                                                                                                                                                                    |   |                     |                                                   |       |                     |                                    |   |                     |                              |         |                     |                          |   |                     |           |   |                     |                                |   |                     |          |   |                     |        |   |                     |       |     |                       |         |
| 3   | first_opioid_type_3                                                                             | Fentanyl (Duragesic, Ionsys)                                                                                                      |                                                                                                                                                                                                                                                                                                                                                                                                                                                                                                                                                                                                                                                                                                                                                                                                                                                                                                                                    |   |                     |                                                   |       |                     |                                    |   |                     |                              |         |                     |                          |   |                     |           |   |                     |                                |   |                     |          |   |                     |        |   |                     |       |     |                       |         |
| 4   | first_opioid_type_4                                                                             | Hydromorphone (Dilaudid)                                                                                                          |                                                                                                                                                                                                                                                                                                                                                                                                                                                                                                                                                                                                                                                                                                                                                                                                                                                                                                                                    |   |                     |                                                   |       |                     |                                    |   |                     |                              |         |                     |                          |   |                     |           |   |                     |                                |   |                     |          |   |                     |        |   |                     |       |     |                       |         |
| 5   | first_opioid_type_5                                                                             | Methadone                                                                                                                         |                                                                                                                                                                                                                                                                                                                                                                                                                                                                                                                                                                                                                                                                                                                                                                                                                                                                                                                                    |   |                     |                                                   |       |                     |                                    |   |                     |                              |         |                     |                          |   |                     |           |   |                     |                                |   |                     |          |   |                     |        |   |                     |       |     |                       |         |
| 6   | first_opioid_type_6                                                                             | Buprenorphine (Suboxone, etc.)                                                                                                    |                                                                                                                                                                                                                                                                                                                                                                                                                                                                                                                                                                                                                                                                                                                                                                                                                                                                                                                                    |   |                     |                                                   |       |                     |                                    |   |                     |                              |         |                     |                          |   |                     |           |   |                     |                                |   |                     |          |   |                     |        |   |                     |       |     |                       |         |
| 7   | first_opioid_type_7                                                                             | Morphine                                                                                                                          |                                                                                                                                                                                                                                                                                                                                                                                                                                                                                                                                                                                                                                                                                                                                                                                                                                                                                                                                    |   |                     |                                                   |       |                     |                                    |   |                     |                              |         |                     |                          |   |                     |           |   |                     |                                |   |                     |          |   |                     |        |   |                     |       |     |                       |         |
| 8   | first_opioid_type_8                                                                             | Heroin                                                                                                                            |                                                                                                                                                                                                                                                                                                                                                                                                                                                                                                                                                                                                                                                                                                                                                                                                                                                                                                                                    |   |                     |                                                   |       |                     |                                    |   |                     |                              |         |                     |                          |   |                     |           |   |                     |                                |   |                     |          |   |                     |        |   |                     |       |     |                       |         |
| 9   | first_opioid_type_9                                                                             | Other                                                                                                                             |                                                                                                                                                                                                                                                                                                                                                                                                                                                                                                                                                                                                                                                                                                                                                                                                                                                                                                                                    |   |                     |                                                   |       |                     |                                    |   |                     |                              |         |                     |                          |   |                     |           |   |                     |                                |   |                     |          |   |                     |        |   |                     |       |     |                       |         |
| 999 | first_opioid_type_999                                                                           | Unknown                                                                                                                           |                                                                                                                                                                                                                                                                                                                                                                                                                                                                                                                                                                                                                                                                                                                                                                                                                                                                                                                                    |   |                     |                                                   |       |                     |                                    |   |                     |                              |         |                     |                          |   |                     |           |   |                     |                                |   |                     |          |   |                     |        |   |                     |       |     |                       |         |
| 781 | <b>opioid_type_oth</b><br><b>Show the field ONLY if:</b><br><b>[first_opioid_type(9)] = '1'</b> | <b>If "Other," please specify.</b>                                                                                                | <b>text, Required</b>                                                                                                                                                                                                                                                                                                                                                                                                                                                                                                                                                                                                                                                                                                                                                                                                                                                                                                              |   |                     |                                                   |       |                     |                                    |   |                     |                              |         |                     |                          |   |                     |           |   |                     |                                |   |                     |          |   |                     |        |   |                     |       |     |                       |         |

|     |                                                                                                        |                                                                               |                                                                                                                                                                                                                                                                                                                                                                                                                                                                                                                                                                                                                                                                                                                                                                                                                                                                                                                                                                                                                                                                                                                                                                                                                                                                                                                                                                                                                                                                                                                                                                                                                                                                                                                                                                                                                                           |   |                    |                                                   |    |                    |                                   |   |                    |                              |   |                    |                                        |   |                    |           |   |                    |                                |   |                    |          |   |                    |         |   |                    |                              |     |                      |                   |
|-----|--------------------------------------------------------------------------------------------------------|-------------------------------------------------------------------------------|-------------------------------------------------------------------------------------------------------------------------------------------------------------------------------------------------------------------------------------------------------------------------------------------------------------------------------------------------------------------------------------------------------------------------------------------------------------------------------------------------------------------------------------------------------------------------------------------------------------------------------------------------------------------------------------------------------------------------------------------------------------------------------------------------------------------------------------------------------------------------------------------------------------------------------------------------------------------------------------------------------------------------------------------------------------------------------------------------------------------------------------------------------------------------------------------------------------------------------------------------------------------------------------------------------------------------------------------------------------------------------------------------------------------------------------------------------------------------------------------------------------------------------------------------------------------------------------------------------------------------------------------------------------------------------------------------------------------------------------------------------------------------------------------------------------------------------------------|---|--------------------|---------------------------------------------------|----|--------------------|-----------------------------------|---|--------------------|------------------------------|---|--------------------|----------------------------------------|---|--------------------|-----------|---|--------------------|--------------------------------|---|--------------------|----------|---|--------------------|---------|---|--------------------|------------------------------|-----|----------------------|-------------------|
| 782 | <b>prev_opioid_type</b><br><br>                                                                        | <b>Previously used opioid(s)?</b><br><i>Brand names listed in parantheses</i> | <b>checkbox, Required</b><br><table border="1"> <tr> <td data-bbox="1042 121 1105 289">1</td> <td data-bbox="1105 121 1382 289">prev_opioid_type_1</td> <td data-bbox="1382 121 1542 289">Oxycodone (OxyContin, Percocet, Roxicodone, etc.)</td> </tr> <tr> <td data-bbox="1042 289 1105 401">2</td> <td data-bbox="1105 289 1382 401">prev_opioid_type_2</td> <td data-bbox="1382 289 1542 401">Hydrocodone (Norco, Vicodin etc.)</td> </tr> <tr> <td data-bbox="1042 401 1105 512">3</td> <td data-bbox="1105 401 1382 512">prev_opioid_type_3</td> <td data-bbox="1382 401 1542 512">Fentanyl (Duragesic, Ionsys)</td> </tr> <tr> <td data-bbox="1042 512 1105 583">4</td> <td data-bbox="1105 512 1382 583">prev_opioid_type_4</td> <td data-bbox="1382 512 1542 583">Hydromorphone (Dilaudid)</td> </tr> <tr> <td data-bbox="1042 583 1105 634">5</td> <td data-bbox="1105 583 1382 634">prev_opioid_type_5</td> <td data-bbox="1382 583 1542 634">Methadone</td> </tr> <tr> <td data-bbox="1042 634 1105 716">6</td> <td data-bbox="1105 634 1382 716">prev_opioid_type_6</td> <td data-bbox="1382 634 1542 716">Buprenorphine (Suboxone, etc.)</td> </tr> <tr> <td data-bbox="1042 716 1105 766">7</td> <td data-bbox="1105 716 1382 766">prev_opioid_type_7</td> <td data-bbox="1382 716 1542 766">Morphine</td> </tr> <tr> <td data-bbox="1042 766 1105 816">8</td> <td data-bbox="1105 766 1382 816">prev_opioid_type_8</td> <td data-bbox="1382 766 1542 816">Heroin</td> </tr> <tr> <td data-bbox="1042 816 1105 867">9</td> <td data-bbox="1105 816 1382 867">prev_opioid_type_9</td> <td data-bbox="1382 816 1542 867">Other</td> </tr> <tr> <td data-bbox="1042 867 1105 938">999</td> <td data-bbox="1105 867 1382 938">prev_opioid_type_999</td> <td data-bbox="1382 867 1542 938">None of the above</td> </tr> </table> | 1 | prev_opioid_type_1 | Oxycodone (OxyContin, Percocet, Roxicodone, etc.) | 2  | prev_opioid_type_2 | Hydrocodone (Norco, Vicodin etc.) | 3 | prev_opioid_type_3 | Fentanyl (Duragesic, Ionsys) | 4 | prev_opioid_type_4 | Hydromorphone (Dilaudid)               | 5 | prev_opioid_type_5 | Methadone | 6 | prev_opioid_type_6 | Buprenorphine (Suboxone, etc.) | 7 | prev_opioid_type_7 | Morphine | 8 | prev_opioid_type_8 | Heroin  | 9 | prev_opioid_type_9 | Other                        | 999 | prev_opioid_type_999 | None of the above |
| 1   | prev_opioid_type_1                                                                                     | Oxycodone (OxyContin, Percocet, Roxicodone, etc.)                             |                                                                                                                                                                                                                                                                                                                                                                                                                                                                                                                                                                                                                                                                                                                                                                                                                                                                                                                                                                                                                                                                                                                                                                                                                                                                                                                                                                                                                                                                                                                                                                                                                                                                                                                                                                                                                                           |   |                    |                                                   |    |                    |                                   |   |                    |                              |   |                    |                                        |   |                    |           |   |                    |                                |   |                    |          |   |                    |         |   |                    |                              |     |                      |                   |
| 2   | prev_opioid_type_2                                                                                     | Hydrocodone (Norco, Vicodin etc.)                                             |                                                                                                                                                                                                                                                                                                                                                                                                                                                                                                                                                                                                                                                                                                                                                                                                                                                                                                                                                                                                                                                                                                                                                                                                                                                                                                                                                                                                                                                                                                                                                                                                                                                                                                                                                                                                                                           |   |                    |                                                   |    |                    |                                   |   |                    |                              |   |                    |                                        |   |                    |           |   |                    |                                |   |                    |          |   |                    |         |   |                    |                              |     |                      |                   |
| 3   | prev_opioid_type_3                                                                                     | Fentanyl (Duragesic, Ionsys)                                                  |                                                                                                                                                                                                                                                                                                                                                                                                                                                                                                                                                                                                                                                                                                                                                                                                                                                                                                                                                                                                                                                                                                                                                                                                                                                                                                                                                                                                                                                                                                                                                                                                                                                                                                                                                                                                                                           |   |                    |                                                   |    |                    |                                   |   |                    |                              |   |                    |                                        |   |                    |           |   |                    |                                |   |                    |          |   |                    |         |   |                    |                              |     |                      |                   |
| 4   | prev_opioid_type_4                                                                                     | Hydromorphone (Dilaudid)                                                      |                                                                                                                                                                                                                                                                                                                                                                                                                                                                                                                                                                                                                                                                                                                                                                                                                                                                                                                                                                                                                                                                                                                                                                                                                                                                                                                                                                                                                                                                                                                                                                                                                                                                                                                                                                                                                                           |   |                    |                                                   |    |                    |                                   |   |                    |                              |   |                    |                                        |   |                    |           |   |                    |                                |   |                    |          |   |                    |         |   |                    |                              |     |                      |                   |
| 5   | prev_opioid_type_5                                                                                     | Methadone                                                                     |                                                                                                                                                                                                                                                                                                                                                                                                                                                                                                                                                                                                                                                                                                                                                                                                                                                                                                                                                                                                                                                                                                                                                                                                                                                                                                                                                                                                                                                                                                                                                                                                                                                                                                                                                                                                                                           |   |                    |                                                   |    |                    |                                   |   |                    |                              |   |                    |                                        |   |                    |           |   |                    |                                |   |                    |          |   |                    |         |   |                    |                              |     |                      |                   |
| 6   | prev_opioid_type_6                                                                                     | Buprenorphine (Suboxone, etc.)                                                |                                                                                                                                                                                                                                                                                                                                                                                                                                                                                                                                                                                                                                                                                                                                                                                                                                                                                                                                                                                                                                                                                                                                                                                                                                                                                                                                                                                                                                                                                                                                                                                                                                                                                                                                                                                                                                           |   |                    |                                                   |    |                    |                                   |   |                    |                              |   |                    |                                        |   |                    |           |   |                    |                                |   |                    |          |   |                    |         |   |                    |                              |     |                      |                   |
| 7   | prev_opioid_type_7                                                                                     | Morphine                                                                      |                                                                                                                                                                                                                                                                                                                                                                                                                                                                                                                                                                                                                                                                                                                                                                                                                                                                                                                                                                                                                                                                                                                                                                                                                                                                                                                                                                                                                                                                                                                                                                                                                                                                                                                                                                                                                                           |   |                    |                                                   |    |                    |                                   |   |                    |                              |   |                    |                                        |   |                    |           |   |                    |                                |   |                    |          |   |                    |         |   |                    |                              |     |                      |                   |
| 8   | prev_opioid_type_8                                                                                     | Heroin                                                                        |                                                                                                                                                                                                                                                                                                                                                                                                                                                                                                                                                                                                                                                                                                                                                                                                                                                                                                                                                                                                                                                                                                                                                                                                                                                                                                                                                                                                                                                                                                                                                                                                                                                                                                                                                                                                                                           |   |                    |                                                   |    |                    |                                   |   |                    |                              |   |                    |                                        |   |                    |           |   |                    |                                |   |                    |          |   |                    |         |   |                    |                              |     |                      |                   |
| 9   | prev_opioid_type_9                                                                                     | Other                                                                         |                                                                                                                                                                                                                                                                                                                                                                                                                                                                                                                                                                                                                                                                                                                                                                                                                                                                                                                                                                                                                                                                                                                                                                                                                                                                                                                                                                                                                                                                                                                                                                                                                                                                                                                                                                                                                                           |   |                    |                                                   |    |                    |                                   |   |                    |                              |   |                    |                                        |   |                    |           |   |                    |                                |   |                    |          |   |                    |         |   |                    |                              |     |                      |                   |
| 999 | prev_opioid_type_999                                                                                   | None of the above                                                             |                                                                                                                                                                                                                                                                                                                                                                                                                                                                                                                                                                                                                                                                                                                                                                                                                                                                                                                                                                                                                                                                                                                                                                                                                                                                                                                                                                                                                                                                                                                                                                                                                                                                                                                                                                                                                                           |   |                    |                                                   |    |                    |                                   |   |                    |                              |   |                    |                                        |   |                    |           |   |                    |                                |   |                    |          |   |                    |         |   |                    |                              |     |                      |                   |
| 783 | <b>prev_opioid_oth</b><br><br><b>Show the field ONLY if:</b><br><pre>[prev_opioid_type(9)] = '1'</pre> | <b>If "Other," please specify.</b>                                            | <b>text, Required</b>                                                                                                                                                                                                                                                                                                                                                                                                                                                                                                                                                                                                                                                                                                                                                                                                                                                                                                                                                                                                                                                                                                                                                                                                                                                                                                                                                                                                                                                                                                                                                                                                                                                                                                                                                                                                                     |   |                    |                                                   |    |                    |                                   |   |                    |                              |   |                    |                                        |   |                    |           |   |                    |                                |   |                    |          |   |                    |         |   |                    |                              |     |                      |                   |
| 784 | <b>preop_sud</b>                                                                                       | <b>Any documentation of substance use BEFORE opioids?</b>                     | <b>yesno, Required</b><br><table border="1"> <tr> <td data-bbox="1042 1150 1081 1192">1</td> <td data-bbox="1081 1150 1138 1192">Yes</td> </tr> <tr> <td data-bbox="1042 1192 1081 1234">0</td> <td data-bbox="1081 1192 1138 1234">No</td> </tr> </table>                                                                                                                                                                                                                                                                                                                                                                                                                                                                                                                                                                                                                                                                                                                                                                                                                                                                                                                                                                                                                                                                                                                                                                                                                                                                                                                                                                                                                                                                                                                                                                                | 1 | Yes                | 0                                                 | No |                    |                                   |   |                    |                              |   |                    |                                        |   |                    |           |   |                    |                                |   |                    |          |   |                    |         |   |                    |                              |     |                      |                   |
| 1   | Yes                                                                                                    |                                                                               |                                                                                                                                                                                                                                                                                                                                                                                                                                                                                                                                                                                                                                                                                                                                                                                                                                                                                                                                                                                                                                                                                                                                                                                                                                                                                                                                                                                                                                                                                                                                                                                                                                                                                                                                                                                                                                           |   |                    |                                                   |    |                    |                                   |   |                    |                              |   |                    |                                        |   |                    |           |   |                    |                                |   |                    |          |   |                    |         |   |                    |                              |     |                      |                   |
| 0   | No                                                                                                     |                                                                               |                                                                                                                                                                                                                                                                                                                                                                                                                                                                                                                                                                                                                                                                                                                                                                                                                                                                                                                                                                                                                                                                                                                                                                                                                                                                                                                                                                                                                                                                                                                                                                                                                                                                                                                                                                                                                                           |   |                    |                                                   |    |                    |                                   |   |                    |                              |   |                    |                                        |   |                    |           |   |                    |                                |   |                    |          |   |                    |         |   |                    |                              |     |                      |                   |
| 785 | <b>preop_sud_hx</b><br><br><b>Show the field ONLY if:</b><br><pre>[preop_sud] = '1'</pre>              | <b>Other substance use (check all that apply)</b>                             | <b>checkbox, Required</b><br><table border="1"> <tr> <td data-bbox="1042 1304 1105 1346">1</td> <td data-bbox="1105 1304 1349 1346">preop_sud_hx_1</td> <td data-bbox="1349 1304 1542 1346">Methamphetamine</td> </tr> <tr> <td data-bbox="1042 1346 1105 1388">2</td> <td data-bbox="1105 1346 1349 1388">preop_sud_hx_2</td> <td data-bbox="1349 1346 1542 1388">Cocaine</td> </tr> <tr> <td data-bbox="1042 1388 1105 1430">3</td> <td data-bbox="1105 1388 1349 1430">preop_sud_hx_3</td> <td data-bbox="1349 1388 1542 1430">Cannabis</td> </tr> <tr> <td data-bbox="1042 1430 1105 1541">4</td> <td data-bbox="1105 1430 1349 1541">preop_sud_hx_4</td> <td data-bbox="1349 1430 1542 1541">Hallucinogens (including Ecstasy/MDMA)</td> </tr> <tr> <td data-bbox="1042 1541 1105 1583">5</td> <td data-bbox="1105 1541 1349 1583">preop_sud_hx_5</td> <td data-bbox="1349 1541 1542 1583">LSD</td> </tr> <tr> <td data-bbox="1042 1583 1105 1625">6</td> <td data-bbox="1105 1583 1349 1625">preop_sud_hx_6</td> <td data-bbox="1349 1583 1542 1625">Benzodiazepine</td> </tr> <tr> <td data-bbox="1042 1625 1105 1667">7</td> <td data-bbox="1105 1625 1349 1667">preop_sud_hx_7</td> <td data-bbox="1349 1625 1542 1667">Alcohol</td> </tr> <tr> <td data-bbox="1042 1667 1105 1738">8</td> <td data-bbox="1105 1667 1349 1738">preop_sud_hx_8</td> <td data-bbox="1349 1667 1542 1738">Tobacco</td> </tr> <tr> <td data-bbox="1042 1738 1105 1810">9</td> <td data-bbox="1105 1738 1349 1810">preop_sud_hx_9</td> <td data-bbox="1349 1738 1542 1810">Other (note any heavy usage)</td> </tr> <tr> <td data-bbox="1042 1810 1105 1852">999</td> <td data-bbox="1105 1810 1349 1852">preop_sud_hx_999</td> <td data-bbox="1349 1810 1542 1852">Unknown/Unclear</td> </tr> </table>                                                | 1 | preop_sud_hx_1     | Methamphetamine                                   | 2  | preop_sud_hx_2     | Cocaine                           | 3 | preop_sud_hx_3     | Cannabis                     | 4 | preop_sud_hx_4     | Hallucinogens (including Ecstasy/MDMA) | 5 | preop_sud_hx_5     | LSD       | 6 | preop_sud_hx_6     | Benzodiazepine                 | 7 | preop_sud_hx_7     | Alcohol  | 8 | preop_sud_hx_8     | Tobacco | 9 | preop_sud_hx_9     | Other (note any heavy usage) | 999 | preop_sud_hx_999     | Unknown/Unclear   |
| 1   | preop_sud_hx_1                                                                                         | Methamphetamine                                                               |                                                                                                                                                                                                                                                                                                                                                                                                                                                                                                                                                                                                                                                                                                                                                                                                                                                                                                                                                                                                                                                                                                                                                                                                                                                                                                                                                                                                                                                                                                                                                                                                                                                                                                                                                                                                                                           |   |                    |                                                   |    |                    |                                   |   |                    |                              |   |                    |                                        |   |                    |           |   |                    |                                |   |                    |          |   |                    |         |   |                    |                              |     |                      |                   |
| 2   | preop_sud_hx_2                                                                                         | Cocaine                                                                       |                                                                                                                                                                                                                                                                                                                                                                                                                                                                                                                                                                                                                                                                                                                                                                                                                                                                                                                                                                                                                                                                                                                                                                                                                                                                                                                                                                                                                                                                                                                                                                                                                                                                                                                                                                                                                                           |   |                    |                                                   |    |                    |                                   |   |                    |                              |   |                    |                                        |   |                    |           |   |                    |                                |   |                    |          |   |                    |         |   |                    |                              |     |                      |                   |
| 3   | preop_sud_hx_3                                                                                         | Cannabis                                                                      |                                                                                                                                                                                                                                                                                                                                                                                                                                                                                                                                                                                                                                                                                                                                                                                                                                                                                                                                                                                                                                                                                                                                                                                                                                                                                                                                                                                                                                                                                                                                                                                                                                                                                                                                                                                                                                           |   |                    |                                                   |    |                    |                                   |   |                    |                              |   |                    |                                        |   |                    |           |   |                    |                                |   |                    |          |   |                    |         |   |                    |                              |     |                      |                   |
| 4   | preop_sud_hx_4                                                                                         | Hallucinogens (including Ecstasy/MDMA)                                        |                                                                                                                                                                                                                                                                                                                                                                                                                                                                                                                                                                                                                                                                                                                                                                                                                                                                                                                                                                                                                                                                                                                                                                                                                                                                                                                                                                                                                                                                                                                                                                                                                                                                                                                                                                                                                                           |   |                    |                                                   |    |                    |                                   |   |                    |                              |   |                    |                                        |   |                    |           |   |                    |                                |   |                    |          |   |                    |         |   |                    |                              |     |                      |                   |
| 5   | preop_sud_hx_5                                                                                         | LSD                                                                           |                                                                                                                                                                                                                                                                                                                                                                                                                                                                                                                                                                                                                                                                                                                                                                                                                                                                                                                                                                                                                                                                                                                                                                                                                                                                                                                                                                                                                                                                                                                                                                                                                                                                                                                                                                                                                                           |   |                    |                                                   |    |                    |                                   |   |                    |                              |   |                    |                                        |   |                    |           |   |                    |                                |   |                    |          |   |                    |         |   |                    |                              |     |                      |                   |
| 6   | preop_sud_hx_6                                                                                         | Benzodiazepine                                                                |                                                                                                                                                                                                                                                                                                                                                                                                                                                                                                                                                                                                                                                                                                                                                                                                                                                                                                                                                                                                                                                                                                                                                                                                                                                                                                                                                                                                                                                                                                                                                                                                                                                                                                                                                                                                                                           |   |                    |                                                   |    |                    |                                   |   |                    |                              |   |                    |                                        |   |                    |           |   |                    |                                |   |                    |          |   |                    |         |   |                    |                              |     |                      |                   |
| 7   | preop_sud_hx_7                                                                                         | Alcohol                                                                       |                                                                                                                                                                                                                                                                                                                                                                                                                                                                                                                                                                                                                                                                                                                                                                                                                                                                                                                                                                                                                                                                                                                                                                                                                                                                                                                                                                                                                                                                                                                                                                                                                                                                                                                                                                                                                                           |   |                    |                                                   |    |                    |                                   |   |                    |                              |   |                    |                                        |   |                    |           |   |                    |                                |   |                    |          |   |                    |         |   |                    |                              |     |                      |                   |
| 8   | preop_sud_hx_8                                                                                         | Tobacco                                                                       |                                                                                                                                                                                                                                                                                                                                                                                                                                                                                                                                                                                                                                                                                                                                                                                                                                                                                                                                                                                                                                                                                                                                                                                                                                                                                                                                                                                                                                                                                                                                                                                                                                                                                                                                                                                                                                           |   |                    |                                                   |    |                    |                                   |   |                    |                              |   |                    |                                        |   |                    |           |   |                    |                                |   |                    |          |   |                    |         |   |                    |                              |     |                      |                   |
| 9   | preop_sud_hx_9                                                                                         | Other (note any heavy usage)                                                  |                                                                                                                                                                                                                                                                                                                                                                                                                                                                                                                                                                                                                                                                                                                                                                                                                                                                                                                                                                                                                                                                                                                                                                                                                                                                                                                                                                                                                                                                                                                                                                                                                                                                                                                                                                                                                                           |   |                    |                                                   |    |                    |                                   |   |                    |                              |   |                    |                                        |   |                    |           |   |                    |                                |   |                    |          |   |                    |         |   |                    |                              |     |                      |                   |
| 999 | preop_sud_hx_999                                                                                       | Unknown/Unclear                                                               |                                                                                                                                                                                                                                                                                                                                                                                                                                                                                                                                                                                                                                                                                                                                                                                                                                                                                                                                                                                                                                                                                                                                                                                                                                                                                                                                                                                                                                                                                                                                                                                                                                                                                                                                                                                                                                           |   |                    |                                                   |    |                    |                                   |   |                    |                              |   |                    |                                        |   |                    |           |   |                    |                                |   |                    |          |   |                    |         |   |                    |                              |     |                      |                   |
| 786 | <b>preop_sud_hx_oth</b><br><br><b>Show the field ONLY if:</b><br><pre>[preop_sud_hx(9)] = '1'</pre>    | <b>If "Other," please specify.</b>                                            | <b>text, Required</b>                                                                                                                                                                                                                                                                                                                                                                                                                                                                                                                                                                                                                                                                                                                                                                                                                                                                                                                                                                                                                                                                                                                                                                                                                                                                                                                                                                                                                                                                                                                                                                                                                                                                                                                                                                                                                     |   |                    |                                                   |    |                    |                                   |   |                    |                              |   |                    |                                        |   |                    |           |   |                    |                                |   |                    |          |   |                    |         |   |                    |                              |     |                      |                   |

|     |                                                                                      |                                                                                                                                                                                                                                                            |                                                                                                                                                                                                                     |   |            |                                                |    |            |                        |
|-----|--------------------------------------------------------------------------------------|------------------------------------------------------------------------------------------------------------------------------------------------------------------------------------------------------------------------------------------------------------|---------------------------------------------------------------------------------------------------------------------------------------------------------------------------------------------------------------------|---|------------|------------------------------------------------|----|------------|------------------------|
| 787 | <b>preop_meth_age</b><br>Show the field ONLY if:<br>[preop_sud_hx(1)] = '1'          | <b>Age of methamphetamine exposure</b><br><i>Enter 999 if unknown.</i>                                                                                                                                                                                     | text, Required                                                                                                                                                                                                      |   |            |                                                |    |            |                        |
| 788 | <b>preop_cocaine_age</b><br>Show the field ONLY if:<br>[preop_sud_hx(2)] = '1'       | <b>Age of cocaine exposure</b><br><i>Enter 999 if unknown.</i>                                                                                                                                                                                             | text, Required                                                                                                                                                                                                      |   |            |                                                |    |            |                        |
| 789 | <b>preop_mj_age</b><br>Show the field ONLY if:<br>[preop_sud_hx(3)] = '1'            | <b>Age of marijuana exposure</b><br><i>Enter 999 if unknown.</i>                                                                                                                                                                                           | text, Required                                                                                                                                                                                                      |   |            |                                                |    |            |                        |
| 790 | <b>preop_psych_age</b><br>Show the field ONLY if:<br>[preop_sud_hx(4)] = '1'         | <b>Age of hallucinogen exposure</b><br><i>Enter 999 if unknown.</i>                                                                                                                                                                                        | text, Required                                                                                                                                                                                                      |   |            |                                                |    |            |                        |
| 791 | <b>preop_lsd_age</b><br>Show the field ONLY if:<br>[preop_sud_hx(5)] = '1'           | <b>Age of LSD exposure</b><br><i>Enter 999 if unknown.</i>                                                                                                                                                                                                 | text, Required                                                                                                                                                                                                      |   |            |                                                |    |            |                        |
| 792 | <b>preop_benzo_age</b><br>Show the field ONLY if:<br>[preop_sud_hx(6)] = '1'         | <b>Age of benzodiazepine exposure</b><br><i>Enter 999 if unknown.</i>                                                                                                                                                                                      | text, Required                                                                                                                                                                                                      |   |            |                                                |    |            |                        |
| 793 | <b>preop_etch_age</b><br>Show the field ONLY if:<br>[preop_sud_hx(7)] = '1'          | <b>Age of alcohol exposure</b><br><i>Enter 999 if unknown.</i>                                                                                                                                                                                             | text, Required                                                                                                                                                                                                      |   |            |                                                |    |            |                        |
| 794 | <b>preop_cigs_age</b><br>Show the field ONLY if:<br>[preop_sud_hx(8)] = '1'          | <b>Age of tobacco exposure</b><br><i>Enter 999 if unknown.</i>                                                                                                                                                                                             | text, Required                                                                                                                                                                                                      |   |            |                                                |    |            |                        |
| 795 | <b>preop_oth_age</b><br>Show the field ONLY if:<br>[preop_sud_hx(9)] = '1'           | <b>Age of [preop_sud_hx_oth] exposure</b><br><i>Enter 999 if unknown.</i>                                                                                                                                                                                  | text, Required                                                                                                                                                                                                      |   |            |                                                |    |            |                        |
| 796 | <b>any_chronic_pain</b>                                                              | <b>Section Header: Chronic Pain ****</b><br><b>Any documentation of chronic pain?</b>                                                                                                                                                                      | yesno, Required<br><table border="1"> <tr><td>1</td><td>Yes</td></tr> <tr><td>0</td><td>No</td></tr> </table>                                                                                                       | 1 | Yes        | 0                                              | No |            |                        |
| 1   | Yes                                                                                  |                                                                                                                                                                                                                                                            |                                                                                                                                                                                                                     |   |            |                                                |    |            |                        |
| 0   | No                                                                                   |                                                                                                                                                                                                                                                            |                                                                                                                                                                                                                     |   |            |                                                |    |            |                        |
| 797 | <b>chronic_pain_spec</b><br>Show the field ONLY if:<br>[any_chronic_pain] = '1'      | <b>Is the quality or location of chronic pain specified?</b>                                                                                                                                                                                               | yesno, Required<br><table border="1"> <tr><td>1</td><td>Yes</td></tr> <tr><td>0</td><td>No</td></tr> </table>                                                                                                       | 1 | Yes        | 0                                              | No |            |                        |
| 1   | Yes                                                                                  |                                                                                                                                                                                                                                                            |                                                                                                                                                                                                                     |   |            |                                                |    |            |                        |
| 0   | No                                                                                   |                                                                                                                                                                                                                                                            |                                                                                                                                                                                                                     |   |            |                                                |    |            |                        |
| 798 | <b>chronic_pain_describe</b><br>Show the field ONLY if:<br>[chronic_pain_spec] = '1' | <b>Name/describe the location and quality.</b>                                                                                                                                                                                                             | text, Required                                                                                                                                                                                                      |   |            |                                                |    |            |                        |
| 799 | <b>cse</b>                                                                           | <b>Section Header: Clinically Significant Events</b><br><b>Did any clinically significant events occur during this encounter that warrant further review?</b><br><i>Includes: Clinician-determined precipitated withdrawal, Grade 4 or 5 adverse event</i> | yesno<br><table border="1"> <tr><td>1</td><td>Yes</td></tr> <tr><td>0</td><td>No</td></tr> </table>                                                                                                                 | 1 | Yes        | 0                                              | No |            |                        |
| 1   | Yes                                                                                  |                                                                                                                                                                                                                                                            |                                                                                                                                                                                                                     |   |            |                                                |    |            |                        |
| 0   | No                                                                                   |                                                                                                                                                                                                                                                            |                                                                                                                                                                                                                     |   |            |                                                |    |            |                        |
| 800 | <b>cse_spec</b><br>Show the field ONLY if:<br>[cse] = '1'                            | <b>Which of the following clinically significant events occurred?</b>                                                                                                                                                                                      | checkbox<br><table border="1"> <tr> <td>1</td> <td>cse_spec_1</td> <td>Precipitated withdrawal (clinician determined)</td> </tr> <tr> <td>2</td> <td>cse_spec_2</td> <td>Life threatening event</td> </tr> </table> | 1 | cse_spec_1 | Precipitated withdrawal (clinician determined) | 2  | cse_spec_2 | Life threatening event |
| 1   | cse_spec_1                                                                           | Precipitated withdrawal (clinician determined)                                                                                                                                                                                                             |                                                                                                                                                                                                                     |   |            |                                                |    |            |                        |
| 2   | cse_spec_2                                                                           | Life threatening event                                                                                                                                                                                                                                     |                                                                                                                                                                                                                     |   |            |                                                |    |            |                        |

|                                                                                |                                                                                                                 |                                                                                                                                                                                                  |                                                                                                                                                                                                                            |   |            |   |                  |     |                                               |   |                    |
|--------------------------------------------------------------------------------|-----------------------------------------------------------------------------------------------------------------|--------------------------------------------------------------------------------------------------------------------------------------------------------------------------------------------------|----------------------------------------------------------------------------------------------------------------------------------------------------------------------------------------------------------------------------|---|------------|---|------------------|-----|-----------------------------------------------|---|--------------------|
| 801                                                                            | <b>attribution_ppt</b><br>Show the field ONLY if:<br>[cse_spec(1)] = '1'                                        | <b>Degree of relatedness to buprenorphine administration (investigator only)</b>                                                                                                                 | <b>radio</b><br><table border="1"> <tr><td>1</td><td>Unrelated</td></tr> <tr><td>2</td><td>Possibly Related</td></tr> <tr><td>3</td><td>Probably Related</td></tr> <tr><td>4</td><td>Definitely Related</td></tr> </table> | 1 | Unrelated  | 2 | Possibly Related | 3   | Probably Related                              | 4 | Definitely Related |
| 1                                                                              | Unrelated                                                                                                       |                                                                                                                                                                                                  |                                                                                                                                                                                                                            |   |            |   |                  |     |                                               |   |                    |
| 2                                                                              | Possibly Related                                                                                                |                                                                                                                                                                                                  |                                                                                                                                                                                                                            |   |            |   |                  |     |                                               |   |                    |
| 3                                                                              | Probably Related                                                                                                |                                                                                                                                                                                                  |                                                                                                                                                                                                                            |   |            |   |                  |     |                                               |   |                    |
| 4                                                                              | Definitely Related                                                                                              |                                                                                                                                                                                                  |                                                                                                                                                                                                                            |   |            |   |                  |     |                                               |   |                    |
| 802                                                                            | <b>attribution_sae</b><br>Show the field ONLY if:<br>[cse_spec(2)] = '1'                                        | <b>Degree of relatedness to buprenorphine administration (investigator only)</b>                                                                                                                 | <b>radio</b><br><table border="1"> <tr><td>1</td><td>Unrelated</td></tr> <tr><td>2</td><td>Possibly Related</td></tr> <tr><td>3</td><td>Probably Related</td></tr> <tr><td>4</td><td>Definitely Related</td></tr> </table> | 1 | Unrelated  | 2 | Possibly Related | 3   | Probably Related                              | 4 | Definitely Related |
| 1                                                                              | Unrelated                                                                                                       |                                                                                                                                                                                                  |                                                                                                                                                                                                                            |   |            |   |                  |     |                                               |   |                    |
| 2                                                                              | Possibly Related                                                                                                |                                                                                                                                                                                                  |                                                                                                                                                                                                                            |   |            |   |                  |     |                                               |   |                    |
| 3                                                                              | Probably Related                                                                                                |                                                                                                                                                                                                  |                                                                                                                                                                                                                            |   |            |   |                  |     |                                               |   |                    |
| 4                                                                              | Definitely Related                                                                                              |                                                                                                                                                                                                  |                                                                                                                                                                                                                            |   |            |   |                  |     |                                               |   |                    |
| 803                                                                            | <b>provider_notes_and_ed_buprenorphine_complete</b>                                                             | <b>Section Header: Form Status</b><br><b>Complete?</b>                                                                                                                                           | <b>dropdown</b><br><table border="1"> <tr><td>0</td><td>Incomplete</td></tr> <tr><td>1</td><td>Unverified</td></tr> <tr><td>2</td><td>Complete</td></tr> </table>                                                          | 0 | Incomplete | 1 | Unverified       | 2   | Complete                                      |   |                    |
| 0                                                                              | Incomplete                                                                                                      |                                                                                                                                                                                                  |                                                                                                                                                                                                                            |   |            |   |                  |     |                                               |   |                    |
| 1                                                                              | Unverified                                                                                                      |                                                                                                                                                                                                  |                                                                                                                                                                                                                            |   |            |   |                  |     |                                               |   |                    |
| 2                                                                              | Complete                                                                                                        |                                                                                                                                                                                                  |                                                                                                                                                                                                                            |   |            |   |                  |     |                                               |   |                    |
| <b>Instrument: ED Bridge Intake Form Page 1 (ed bridge intake form page 1)</b> |                                                                                                                 |                                                                                                                                                                                                  |                                                                                                                                                                                                                            |   |            |   |                  |     |                                               |   |                    |
| 804                                                                            | <b>intake</b>                                                                                                   | <b>Section Header: Intake Form</b><br><b>Does the patient have an intake form corresponding to this specific ED visit?</b>                                                                       | <b>radio, Required</b><br><table border="1"> <tr><td>1</td><td>Yes</td></tr> <tr><td>0</td><td>No</td></tr> </table>                                                                                                       | 1 | Yes        | 0 | No               |     |                                               |   |                    |
| 1                                                                              | Yes                                                                                                             |                                                                                                                                                                                                  |                                                                                                                                                                                                                            |   |            |   |                  |     |                                               |   |                    |
| 0                                                                              | No                                                                                                              |                                                                                                                                                                                                  |                                                                                                                                                                                                                            |   |            |   |                  |     |                                               |   |                    |
| 805                                                                            | <b>any_intake</b><br>Show the field ONLY if:<br>[intake] = '0'                                                  | <b>Does the patient have an intake form completed within 30 days after this ED visit?</b>                                                                                                        | <b>yesno, Required</b><br><table border="1"> <tr><td>1</td><td>Yes</td></tr> <tr><td>0</td><td>No</td></tr> </table>                                                                                                       | 1 | Yes        | 0 | No               |     |                                               |   |                    |
| 1                                                                              | Yes                                                                                                             |                                                                                                                                                                                                  |                                                                                                                                                                                                                            |   |            |   |                  |     |                                               |   |                    |
| 0                                                                              | No                                                                                                              |                                                                                                                                                                                                  |                                                                                                                                                                                                                            |   |            |   |                  |     |                                               |   |                    |
| 806                                                                            | <b>intake_ed</b><br>Show the field ONLY if:<br>[any_intake] = '1'                                               | <b>Does this intake form belong to another specific ED visit?</b>                                                                                                                                | <b>yesno, Required</b><br><table border="1"> <tr><td>1</td><td>Yes</td></tr> <tr><td>0</td><td>No</td></tr> </table>                                                                                                       | 1 | Yes        | 0 | No               |     |                                               |   |                    |
| 1                                                                              | Yes                                                                                                             |                                                                                                                                                                                                  |                                                                                                                                                                                                                            |   |            |   |                  |     |                                               |   |                    |
| 0                                                                              | No                                                                                                              |                                                                                                                                                                                                  |                                                                                                                                                                                                                            |   |            |   |                  |     |                                               |   |                    |
| 807                                                                            | <b>ref_md</b><br>Show the field ONLY if:<br>[intake] = '1' OR [intake_ed] = '0'                                 | <b>Section Header: Patient Information and ED Visit</b><br><b>Referring ED provider, as listed on intake sheet</b><br><i>Enter "N/A" if none listed. Please enter as: Last name, First name.</i> | <b>text, Required</b>                                                                                                                                                                                                      |   |            |   |                  |     |                                               |   |                    |
| 808                                                                            | <b>if_no_ins</b><br>Show the field ONLY if:<br>([intake] = '1' or [intake_ed] = '0') and [insurance_1(8)] = '1' | <b>If the patient does not have insurance, was a plan made for obtaining insurance?</b><br><i>See intake form for plan/expected status.</i>                                                      | <b>radio, Required</b><br><table border="1"> <tr><td>1</td><td>Yes</td></tr> <tr><td>0</td><td>No</td></tr> <tr><td>999</td><td>N/A or not specified on ED Bridge intake form</td></tr> </table>                           | 1 | Yes        | 0 | No               | 999 | N/A or not specified on ED Bridge intake form |   |                    |
| 1                                                                              | Yes                                                                                                             |                                                                                                                                                                                                  |                                                                                                                                                                                                                            |   |            |   |                  |     |                                               |   |                    |
| 0                                                                              | No                                                                                                              |                                                                                                                                                                                                  |                                                                                                                                                                                                                            |   |            |   |                  |     |                                               |   |                    |
| 999                                                                            | N/A or not specified on ED Bridge intake form                                                                   |                                                                                                                                                                                                  |                                                                                                                                                                                                                            |   |            |   |                  |     |                                               |   |                    |
| 809                                                                            | <b>primary_care</b><br>Show the field ONLY if:<br>[intake] = '1' OR [intake_ed] = '0'                           | <b>Does the patient have a primary care home?</b><br><i>From intake form.</i>                                                                                                                    | <b>radio, Required</b><br><table border="1"> <tr><td>1</td><td>Yes</td></tr> <tr><td>0</td><td>No</td></tr> <tr><td>999</td><td>Not specified on ED Bridge intake form</td></tr> </table>                                  | 1 | Yes        | 0 | No               | 999 | Not specified on ED Bridge intake form        |   |                    |
| 1                                                                              | Yes                                                                                                             |                                                                                                                                                                                                  |                                                                                                                                                                                                                            |   |            |   |                  |     |                                               |   |                    |
| 0                                                                              | No                                                                                                              |                                                                                                                                                                                                  |                                                                                                                                                                                                                            |   |            |   |                  |     |                                               |   |                    |
| 999                                                                            | Not specified on ED Bridge intake form                                                                          |                                                                                                                                                                                                  |                                                                                                                                                                                                                            |   |            |   |                  |     |                                               |   |                    |

|     |                                                                                                            |                                                                                                                                                                         |                                                                                                                                                                                                                                                                                                                                                                                                                                                                                                                                                                                                                                                                                                                                                                                                                                        |   |            |                                                                      |            |           |                                                      |   |           |         |   |           |                   |   |           |                                                 |   |           |                                                                          |   |           |              |   |           |       |     |             |         |
|-----|------------------------------------------------------------------------------------------------------------|-------------------------------------------------------------------------------------------------------------------------------------------------------------------------|----------------------------------------------------------------------------------------------------------------------------------------------------------------------------------------------------------------------------------------------------------------------------------------------------------------------------------------------------------------------------------------------------------------------------------------------------------------------------------------------------------------------------------------------------------------------------------------------------------------------------------------------------------------------------------------------------------------------------------------------------------------------------------------------------------------------------------------|---|------------|----------------------------------------------------------------------|------------|-----------|------------------------------------------------------|---|-----------|---------|---|-----------|-------------------|---|-----------|-------------------------------------------------|---|-----------|--------------------------------------------------------------------------|---|-----------|--------------|---|-----------|-------|-----|-------------|---------|
| 810 | <b>mental_health</b><br><br><b>Show the field ONLY if:</b><br><b>[intake] = '1' OR [intake_ed] = '0'</b>   | <b>Section Header: Other Concerns</b><br><br><b>Does the patient have a mental health provider?</b><br><i>From intake sheet.</i>                                        | <b>radio, Required</b><br><table border="1"> <tr> <td>1</td> <td>Yes</td> </tr> <tr> <td>0</td> <td>No</td> </tr> <tr> <td>999</td> <td>Not specified on ED Bridge intake form</td> </tr> </table>                                                                                                                                                                                                                                                                                                                                                                                                                                                                                                                                                                                                                                     | 1 | Yes        | 0                                                                    | No         | 999       | Not specified on ED Bridge intake form               |   |           |         |   |           |                   |   |           |                                                 |   |           |                                                                          |   |           |              |   |           |       |     |             |         |
| 1   | Yes                                                                                                        |                                                                                                                                                                         |                                                                                                                                                                                                                                                                                                                                                                                                                                                                                                                                                                                                                                                                                                                                                                                                                                        |   |            |                                                                      |            |           |                                                      |   |           |         |   |           |                   |   |           |                                                 |   |           |                                                                          |   |           |              |   |           |       |     |             |         |
| 0   | No                                                                                                         |                                                                                                                                                                         |                                                                                                                                                                                                                                                                                                                                                                                                                                                                                                                                                                                                                                                                                                                                                                                                                                        |   |            |                                                                      |            |           |                                                      |   |           |         |   |           |                   |   |           |                                                 |   |           |                                                                          |   |           |              |   |           |       |     |             |         |
| 999 | Not specified on ED Bridge intake form                                                                     |                                                                                                                                                                         |                                                                                                                                                                                                                                                                                                                                                                                                                                                                                                                                                                                                                                                                                                                                                                                                                                        |   |            |                                                                      |            |           |                                                      |   |           |         |   |           |                   |   |           |                                                 |   |           |                                                                          |   |           |              |   |           |       |     |             |         |
| 811 | <b>trauma</b><br><br><b>Show the field ONLY if:</b><br><b>[intake] = '1' OR [intake_ed] = '0'</b>          | <b>Were any traumatic events documented on the ED Bridge intake form?</b><br><i>From intake sheet. Can include physical, emotional, psychological, or other trauma.</i> | <b>yesno, Required</b><br><table border="1"> <tr> <td>1</td> <td>Yes</td> </tr> <tr> <td>0</td> <td>No</td> </tr> </table>                                                                                                                                                                                                                                                                                                                                                                                                                                                                                                                                                                                                                                                                                                             | 1 | Yes        | 0                                                                    | No         |           |                                                      |   |           |         |   |           |                   |   |           |                                                 |   |           |                                                                          |   |           |              |   |           |       |     |             |         |
| 1   | Yes                                                                                                        |                                                                                                                                                                         |                                                                                                                                                                                                                                                                                                                                                                                                                                                                                                                                                                                                                                                                                                                                                                                                                                        |   |            |                                                                      |            |           |                                                      |   |           |         |   |           |                   |   |           |                                                 |   |           |                                                                          |   |           |              |   |           |       |     |             |         |
| 0   | No                                                                                                         |                                                                                                                                                                         |                                                                                                                                                                                                                                                                                                                                                                                                                                                                                                                                                                                                                                                                                                                                                                                                                                        |   |            |                                                                      |            |           |                                                      |   |           |         |   |           |                   |   |           |                                                 |   |           |                                                                          |   |           |              |   |           |       |     |             |         |
|     | <b>Show the field ONLY if:</b><br><b>[trauma] = '1'</b>                                                    | <b>Please specify the traumatic event(s).</b><br><i>E.g., death of loved one, car accident, etc.</i>                                                                    | <b>text, Required</b>                                                                                                                                                                                                                                                                                                                                                                                                                                                                                                                                                                                                                                                                                                                                                                                                                  |   |            |                                                                      |            |           |                                                      |   |           |         |   |           |                   |   |           |                                                 |   |           |                                                                          |   |           |              |   |           |       |     |             |         |
| 813 | <b>housing</b><br><br><b>Show the field ONLY if:</b><br><b>[intake] = '1' OR [intake_ed] = '0'</b>         | <b>Current housing situation</b>                                                                                                                                        | <b>checkbox, Required</b><br><table border="1"> <tr> <td>1</td> <td>housing_1</td> <td>Stably housed (own or rent house or apartment, shared housing, etc.)</td> </tr> <tr> <td>2</td> <td>housing_2</td> <td>Marginally/unstably housed (including couch surfing)</td> </tr> <tr> <td>3</td> <td>housing_3</td> <td>Shelter</td> </tr> <tr> <td>4</td> <td>housing_4</td> <td>Street or vehicle</td> </tr> <tr> <td>5</td> <td>housing_5</td> <td>Sobering center (short term, e.g., Cherry Hill)</td> </tr> <tr> <td>6</td> <td>housing_6</td> <td>Sober living facility/halfway house (Teen Challenge, Orchid House, etc.)</td> </tr> <tr> <td>7</td> <td>housing_7</td> <td>Homeless NOS</td> </tr> <tr> <td>8</td> <td>housing_8</td> <td>Other</td> </tr> <tr> <td>999</td> <td>housing_999</td> <td>Unknown</td> </tr> </table> | 1 | housing_1  | Stably housed (own or rent house or apartment, shared housing, etc.) | 2          | housing_2 | Marginally/unstably housed (including couch surfing) | 3 | housing_3 | Shelter | 4 | housing_4 | Street or vehicle | 5 | housing_5 | Sobering center (short term, e.g., Cherry Hill) | 6 | housing_6 | Sober living facility/halfway house (Teen Challenge, Orchid House, etc.) | 7 | housing_7 | Homeless NOS | 8 | housing_8 | Other | 999 | housing_999 | Unknown |
| 1   | housing_1                                                                                                  | Stably housed (own or rent house or apartment, shared housing, etc.)                                                                                                    |                                                                                                                                                                                                                                                                                                                                                                                                                                                                                                                                                                                                                                                                                                                                                                                                                                        |   |            |                                                                      |            |           |                                                      |   |           |         |   |           |                   |   |           |                                                 |   |           |                                                                          |   |           |              |   |           |       |     |             |         |
| 2   | housing_2                                                                                                  | Marginally/unstably housed (including couch surfing)                                                                                                                    |                                                                                                                                                                                                                                                                                                                                                                                                                                                                                                                                                                                                                                                                                                                                                                                                                                        |   |            |                                                                      |            |           |                                                      |   |           |         |   |           |                   |   |           |                                                 |   |           |                                                                          |   |           |              |   |           |       |     |             |         |
| 3   | housing_3                                                                                                  | Shelter                                                                                                                                                                 |                                                                                                                                                                                                                                                                                                                                                                                                                                                                                                                                                                                                                                                                                                                                                                                                                                        |   |            |                                                                      |            |           |                                                      |   |           |         |   |           |                   |   |           |                                                 |   |           |                                                                          |   |           |              |   |           |       |     |             |         |
| 4   | housing_4                                                                                                  | Street or vehicle                                                                                                                                                       |                                                                                                                                                                                                                                                                                                                                                                                                                                                                                                                                                                                                                                                                                                                                                                                                                                        |   |            |                                                                      |            |           |                                                      |   |           |         |   |           |                   |   |           |                                                 |   |           |                                                                          |   |           |              |   |           |       |     |             |         |
| 5   | housing_5                                                                                                  | Sobering center (short term, e.g., Cherry Hill)                                                                                                                         |                                                                                                                                                                                                                                                                                                                                                                                                                                                                                                                                                                                                                                                                                                                                                                                                                                        |   |            |                                                                      |            |           |                                                      |   |           |         |   |           |                   |   |           |                                                 |   |           |                                                                          |   |           |              |   |           |       |     |             |         |
| 6   | housing_6                                                                                                  | Sober living facility/halfway house (Teen Challenge, Orchid House, etc.)                                                                                                |                                                                                                                                                                                                                                                                                                                                                                                                                                                                                                                                                                                                                                                                                                                                                                                                                                        |   |            |                                                                      |            |           |                                                      |   |           |         |   |           |                   |   |           |                                                 |   |           |                                                                          |   |           |              |   |           |       |     |             |         |
| 7   | housing_7                                                                                                  | Homeless NOS                                                                                                                                                            |                                                                                                                                                                                                                                                                                                                                                                                                                                                                                                                                                                                                                                                                                                                                                                                                                                        |   |            |                                                                      |            |           |                                                      |   |           |         |   |           |                   |   |           |                                                 |   |           |                                                                          |   |           |              |   |           |       |     |             |         |
| 8   | housing_8                                                                                                  | Other                                                                                                                                                                   |                                                                                                                                                                                                                                                                                                                                                                                                                                                                                                                                                                                                                                                                                                                                                                                                                                        |   |            |                                                                      |            |           |                                                      |   |           |         |   |           |                   |   |           |                                                 |   |           |                                                                          |   |           |              |   |           |       |     |             |         |
| 999 | housing_999                                                                                                | Unknown                                                                                                                                                                 |                                                                                                                                                                                                                                                                                                                                                                                                                                                                                                                                                                                                                                                                                                                                                                                                                                        |   |            |                                                                      |            |           |                                                      |   |           |         |   |           |                   |   |           |                                                 |   |           |                                                                          |   |           |              |   |           |       |     |             |         |
| 814 | <b>housing_oth</b>                                                                                         | <b>If "Other," please specify.</b>                                                                                                                                      | <b>text, Required</b>                                                                                                                                                                                                                                                                                                                                                                                                                                                                                                                                                                                                                                                                                                                                                                                                                  |   |            |                                                                      |            |           |                                                      |   |           |         |   |           |                   |   |           |                                                 |   |           |                                                                          |   |           |              |   |           |       |     |             |         |
| 815 | <b>Show the field ONLY if:</b><br><b>[housing(8)] = '1'</b><br><br><b>housing_plan</b>                     | <b>If the patient does not currently have housing, was a plan made to obtain housing?</b>                                                                               | <b>radio, Required</b><br><table border="1"> <tr> <td>1</td> <td>Yes</td> </tr> <tr> <td>0</td> <td>No</td> </tr> <tr> <td>999</td> <td>N/A or not specified on ED Bridge intake form</td> </tr> </table>                                                                                                                                                                                                                                                                                                                                                                                                                                                                                                                                                                                                                              | 1 | Yes        | 0                                                                    | No         | 999       | N/A or not specified on ED Bridge intake form        |   |           |         |   |           |                   |   |           |                                                 |   |           |                                                                          |   |           |              |   |           |       |     |             |         |
| 1   | Yes                                                                                                        |                                                                                                                                                                         |                                                                                                                                                                                                                                                                                                                                                                                                                                                                                                                                                                                                                                                                                                                                                                                                                                        |   |            |                                                                      |            |           |                                                      |   |           |         |   |           |                   |   |           |                                                 |   |           |                                                                          |   |           |              |   |           |       |     |             |         |
| 0   | No                                                                                                         |                                                                                                                                                                         |                                                                                                                                                                                                                                                                                                                                                                                                                                                                                                                                                                                                                                                                                                                                                                                                                                        |   |            |                                                                      |            |           |                                                      |   |           |         |   |           |                   |   |           |                                                 |   |           |                                                                          |   |           |              |   |           |       |     |             |         |
| 999 | N/A or not specified on ED Bridge intake form                                                              |                                                                                                                                                                         |                                                                                                                                                                                                                                                                                                                                                                                                                                                                                                                                                                                                                                                                                                                                                                                                                                        |   |            |                                                                      |            |           |                                                      |   |           |         |   |           |                   |   |           |                                                 |   |           |                                                                          |   |           |              |   |           |       |     |             |         |
| 816 | <b>Show the field ONLY if:</b><br><b>[intake]='1'OR[intake_ed]='0'</b><br><br><b>ed_bridge_intake_form</b> | <b>Section Header: Form Status</b>                                                                                                                                      | <b>dropdown</b>                                                                                                                                                                                                                                                                                                                                                                                                                                                                                                                                                                                                                                                                                                                                                                                                                        |   |            |                                                                      |            |           |                                                      |   |           |         |   |           |                   |   |           |                                                 |   |           |                                                                          |   |           |              |   |           |       |     |             |         |
|     | <b>page_1_complete</b>                                                                                     | <b>Complete?</b>                                                                                                                                                        | <table border="1"> <tr> <td>0</td> <td>Incomplete</td> </tr> <tr> <td>1</td> <td>Unverified</td> </tr> <tr> <td>2</td> <td>Complete</td> </tr> </table>                                                                                                                                                                                                                                                                                                                                                                                                                                                                                                                                                                                                                                                                                | 0 | Incomplete | 1                                                                    | Unverified | 2         | Complete                                             |   |           |         |   |           |                   |   |           |                                                 |   |           |                                                                          |   |           |              |   |           |       |     |             |         |
| 0   | Incomplete                                                                                                 |                                                                                                                                                                         |                                                                                                                                                                                                                                                                                                                                                                                                                                                                                                                                                                                                                                                                                                                                                                                                                                        |   |            |                                                                      |            |           |                                                      |   |           |         |   |           |                   |   |           |                                                 |   |           |                                                                          |   |           |              |   |           |       |     |             |         |
| 1   | Unverified                                                                                                 |                                                                                                                                                                         |                                                                                                                                                                                                                                                                                                                                                                                                                                                                                                                                                                                                                                                                                                                                                                                                                                        |   |            |                                                                      |            |           |                                                      |   |           |         |   |           |                   |   |           |                                                 |   |           |                                                                          |   |           |              |   |           |       |     |             |         |
| 2   | Complete                                                                                                   |                                                                                                                                                                         |                                                                                                                                                                                                                                                                                                                                                                                                                                                                                                                                                                                                                                                                                                                                                                                                                                        |   |            |                                                                      |            |           |                                                      |   |           |         |   |           |                   |   |           |                                                 |   |           |                                                                          |   |           |              |   |           |       |     |             |         |



Instrument: ED Bridge Intake Form Page 2 (ed\_bridge\_intake\_form\_page\_2)

|     |                                                                            |                                                                                                         |                                                                         |
|-----|----------------------------------------------------------------------------|---------------------------------------------------------------------------------------------------------|-------------------------------------------------------------------------|
| 817 | intake_2<br>Show the field ONLY if:<br>[intake] = '1' OR [intake_ed] = '0' | Was the second page of the ED Bridge intake form filled out?                                            | yesno, Required<br>1 Yes<br>0 No                                        |
| 818 | psychosocial<br>Show the field ONLY if:<br>[intake_2] = '1'                | Section Header: <i>Psychosocial</i><br>Was a psychosocial support person contacted during the ED visit? | radio, Required<br>1 Yes<br>999 Not specified on ED Bridge intake form. |
| 819 | psychosocial_plan<br>Show the field ONLY if:<br>[intake_2] = '1'           | Is there a plan for ongoing psychosocial recovery support?                                              | radio, Required<br>1 Yes<br>999 Not specified on ED Bridge intake form. |
| 820 | psychosocial_referral<br>Show the field ONLY if:<br>[intake_2] = '1'       | Was an appointment made for psychosocial support?                                                       | radio, Required<br>1 Yes<br>999 Not specified on ED Bridge intake form. |
| 821 | mental<br>Show the field ONLY if:<br>[intake_2] = '1'                      | Section Header: <i>Mental Health Needs</i><br>Any mental health concerns?                               | radio, Required<br>1 Yes<br>999 Not specified on ED Bridge intake form. |
| 822 | mental_health_ref<br>Show the field ONLY if:<br>[intake_2] = '1'           | Was a mental health provider contacted?<br><i>From intake sheet.</i>                                    | radio, Required<br>1 Yes<br>999 Not specified on ED Bridge intake form  |
| 823 | mh_plan<br>Show the field ONLY if:<br>[intake_2] = '1'                     | Is there a psychiatric medication plan?                                                                 | radio, Required<br>1 Yes<br>999 Not specified on ED Bridge intake form  |
| 824 | mh_appt<br>Show the field ONLY if:<br>[intake_2] = '1'                     | Was an appointment made for mental health concerns?                                                     | radio, Required<br>1 Yes<br>999 Not specified on ED Bridge intake form  |
| 825 | dv<br>Show the field ONLY if:<br>[intake_2] = '1'                          | Section Header: <i>Social</i><br>Was the patient screened for domestic violence (DV)?                   | radio, Required<br>1 Yes<br>999 Not specified on ED Bridge intake form. |
| 826 | dv_notify<br>Show the field ONLY if:<br>[dv] = '1'                         | If DV confirmed, provider notified?                                                                     | radio, Required<br>1 Yes<br>999 Not specified on ED Bridge intake form. |

|                                         |                                                                                      |                                                                                                                                                                                          |                                                                                                                                                                                                                                                                                                                                                                                                                                                                                                                                                                                                                    |   |                 |                   |                                         |            |                     |   |            |                    |   |            |                             |   |            |                                  |   |            |                                 |     |              |                                  |
|-----------------------------------------|--------------------------------------------------------------------------------------|------------------------------------------------------------------------------------------------------------------------------------------------------------------------------------------|--------------------------------------------------------------------------------------------------------------------------------------------------------------------------------------------------------------------------------------------------------------------------------------------------------------------------------------------------------------------------------------------------------------------------------------------------------------------------------------------------------------------------------------------------------------------------------------------------------------------|---|-----------------|-------------------|-----------------------------------------|------------|---------------------|---|------------|--------------------|---|------------|-----------------------------|---|------------|----------------------------------|---|------------|---------------------------------|-----|--------------|----------------------------------|
| 827                                     | <b>social_plan</b><br>Show the field ONLY if:<br>[intake_2] = '1'                    | <b>Is there a plan for social support?</b>                                                                                                                                               | <b>radio, Required</b><br><table border="1" data-bbox="1047 115 1526 241"> <tr> <td>1</td> <td>Yes</td> </tr> <tr> <td>999</td> <td>Not specified on ED Bridge intake form.</td> </tr> </table>                                                                                                                                                                                                                                                                                                                                                                                                                    | 1 | Yes             | 999               | Not specified on ED Bridge intake form. |            |                     |   |            |                    |   |            |                             |   |            |                                  |   |            |                                 |     |              |                                  |
| 1                                       | Yes                                                                                  |                                                                                                                                                                                          |                                                                                                                                                                                                                                                                                                                                                                                                                                                                                                                                                                                                                    |   |                 |                   |                                         |            |                     |   |            |                    |   |            |                             |   |            |                                  |   |            |                                 |     |              |                                  |
| 999                                     | Not specified on ED Bridge intake form.                                              |                                                                                                                                                                                          |                                                                                                                                                                                                                                                                                                                                                                                                                                                                                                                                                                                                                    |   |                 |                   |                                         |            |                     |   |            |                    |   |            |                             |   |            |                                  |   |            |                                 |     |              |                                  |
| 828                                     | <b>mat_plan</b><br>Show the field ONLY if:<br>[intake_2] = '1'                       | <b>Section Header: Substance Use Treatment</b><br><b>What is the plan for treatment?</b>                                                                                                 | <b>checkbox, Required</b><br><table border="1" data-bbox="1047 289 1526 657"> <tr> <td>1</td> <td>mat_plan_1</td> <td>ED Bridge</td> </tr> <tr> <td>2</td> <td>mat_plan_2</td> <td>BIC</td> </tr> <tr> <td>3</td> <td>mat_plan_3</td> <td>K6/K7</td> </tr> <tr> <td>4</td> <td>mat_plan_4</td> <td>Outside PCP</td> </tr> <tr> <td>5</td> <td>mat_plan_5</td> <td>Out-of-county MAT</td> </tr> <tr> <td>6</td> <td>mat_plan_6</td> <td>Methadone clinic</td> </tr> <tr> <td>999</td> <td>mat_plan_999</td> <td>Not specified on the intake form</td> </tr> </table>                                                | 1 | mat_plan_1      | ED Bridge         | 2                                       | mat_plan_2 | BIC                 | 3 | mat_plan_3 | K6/K7              | 4 | mat_plan_4 | Outside PCP                 | 5 | mat_plan_5 | Out-of-county MAT                | 6 | mat_plan_6 | Methadone clinic                | 999 | mat_plan_999 | Not specified on the intake form |
| 1                                       | mat_plan_1                                                                           | ED Bridge                                                                                                                                                                                |                                                                                                                                                                                                                                                                                                                                                                                                                                                                                                                                                                                                                    |   |                 |                   |                                         |            |                     |   |            |                    |   |            |                             |   |            |                                  |   |            |                                 |     |              |                                  |
| 2                                       | mat_plan_2                                                                           | BIC                                                                                                                                                                                      |                                                                                                                                                                                                                                                                                                                                                                                                                                                                                                                                                                                                                    |   |                 |                   |                                         |            |                     |   |            |                    |   |            |                             |   |            |                                  |   |            |                                 |     |              |                                  |
| 3                                       | mat_plan_3                                                                           | K6/K7                                                                                                                                                                                    |                                                                                                                                                                                                                                                                                                                                                                                                                                                                                                                                                                                                                    |   |                 |                   |                                         |            |                     |   |            |                    |   |            |                             |   |            |                                  |   |            |                                 |     |              |                                  |
| 4                                       | mat_plan_4                                                                           | Outside PCP                                                                                                                                                                              |                                                                                                                                                                                                                                                                                                                                                                                                                                                                                                                                                                                                                    |   |                 |                   |                                         |            |                     |   |            |                    |   |            |                             |   |            |                                  |   |            |                                 |     |              |                                  |
| 5                                       | mat_plan_5                                                                           | Out-of-county MAT                                                                                                                                                                        |                                                                                                                                                                                                                                                                                                                                                                                                                                                                                                                                                                                                                    |   |                 |                   |                                         |            |                     |   |            |                    |   |            |                             |   |            |                                  |   |            |                                 |     |              |                                  |
| 6                                       | mat_plan_6                                                                           | Methadone clinic                                                                                                                                                                         |                                                                                                                                                                                                                                                                                                                                                                                                                                                                                                                                                                                                                    |   |                 |                   |                                         |            |                     |   |            |                    |   |            |                             |   |            |                                  |   |            |                                 |     |              |                                  |
| 999                                     | mat_plan_999                                                                         | Not specified on the intake form                                                                                                                                                         |                                                                                                                                                                                                                                                                                                                                                                                                                                                                                                                                                                                                                    |   |                 |                   |                                         |            |                     |   |            |                    |   |            |                             |   |            |                                  |   |            |                                 |     |              |                                  |
| 829                                     | <b>ed_bridge_intake_form_page_2_complete</b>                                         | <b>Section Header: Form Status</b><br><b>Complete?</b>                                                                                                                                   | <b>dropdown</b><br><table border="1" data-bbox="1047 766 1226 913"> <tr> <td>0</td> <td>Incomplete</td> </tr> <tr> <td>1</td> <td>Unverified</td> </tr> <tr> <td>2</td> <td>Complete</td> </tr> </table>                                                                                                                                                                                                                                                                                                                                                                                                           | 0 | Incomplete      | 1                 | Unverified                              | 2          | Complete            |   |            |                    |   |            |                             |   |            |                                  |   |            |                                 |     |              |                                  |
| 0                                       | Incomplete                                                                           |                                                                                                                                                                                          |                                                                                                                                                                                                                                                                                                                                                                                                                                                                                                                                                                                                                    |   |                 |                   |                                         |            |                     |   |            |                    |   |            |                             |   |            |                                  |   |            |                                 |     |              |                                  |
| 1                                       | Unverified                                                                           |                                                                                                                                                                                          |                                                                                                                                                                                                                                                                                                                                                                                                                                                                                                                                                                                                                    |   |                 |                   |                                         |            |                     |   |            |                    |   |            |                             |   |            |                                  |   |            |                                 |     |              |                                  |
| 2                                       | Complete                                                                             |                                                                                                                                                                                          |                                                                                                                                                                                                                                                                                                                                                                                                                                                                                                                                                                                                                    |   |                 |                   |                                         |            |                     |   |            |                    |   |            |                             |   |            |                                  |   |            |                                 |     |              |                                  |
| <b>Instrument: Follow-Up (followup)</b> |                                                                                      |                                                                                                                                                                                          |                                                                                                                                                                                                                                                                                                                                                                                                                                                                                                                                                                                                                    |   |                 |                   |                                         |            |                     |   |            |                    |   |            |                             |   |            |                                  |   |            |                                 |     |              |                                  |
| 830                                     | <b>any_contact</b><br>Show the field ONLY if:<br>[intake] = '1' OR [intake_ed] = '0' | <b>Section Header: Follow-up information provided by MAT coordinator (Christian Hailozian)</b><br><b>Was any contact made with the patient within 30 days of their initial ED visit?</b> | <b>radio, Required</b><br><table border="1" data-bbox="1047 1029 1279 1228"> <tr> <td>1</td> <td>Yes (in-person)</td> </tr> <tr> <td>2</td> <td>Yes (phone/text)</td> </tr> <tr> <td>3</td> <td>Yes (both)</td> </tr> <tr> <td>0</td> <td>No</td> </tr> </table>                                                                                                                                                                                                                                                                                                                                                   | 1 | Yes (in-person) | 2                 | Yes (phone/text)                        | 3          | Yes (both)          | 0 | No         |                    |   |            |                             |   |            |                                  |   |            |                                 |     |              |                                  |
| 1                                       | Yes (in-person)                                                                      |                                                                                                                                                                                          |                                                                                                                                                                                                                                                                                                                                                                                                                                                                                                                                                                                                                    |   |                 |                   |                                         |            |                     |   |            |                    |   |            |                             |   |            |                                  |   |            |                                 |     |              |                                  |
| 2                                       | Yes (phone/text)                                                                     |                                                                                                                                                                                          |                                                                                                                                                                                                                                                                                                                                                                                                                                                                                                                                                                                                                    |   |                 |                   |                                         |            |                     |   |            |                    |   |            |                             |   |            |                                  |   |            |                                 |     |              |                                  |
| 3                                       | Yes (both)                                                                           |                                                                                                                                                                                          |                                                                                                                                                                                                                                                                                                                                                                                                                                                                                                                                                                                                                    |   |                 |                   |                                         |            |                     |   |            |                    |   |            |                             |   |            |                                  |   |            |                                 |     |              |                                  |
| 0                                       | No                                                                                   |                                                                                                                                                                                          |                                                                                                                                                                                                                                                                                                                                                                                                                                                                                                                                                                                                                    |   |                 |                   |                                         |            |                     |   |            |                    |   |            |                             |   |            |                                  |   |            |                                 |     |              |                                  |
| 831                                     | <b>ed_bridge</b><br>Show the field ONLY if:<br>[intake] = '1' OR [intake_ed] = '0'   | <b>Did the patient accept an ED bridge follow-up appointment?</b>                                                                                                                        | <b>radio, Required</b><br><table border="1" data-bbox="1047 1270 1140 1375"> <tr> <td>1</td> <td>Yes</td> </tr> <tr> <td>0</td> <td>No</td> </tr> </table>                                                                                                                                                                                                                                                                                                                                                                                                                                                         | 1 | Yes             | 0                 | No                                      |            |                     |   |            |                    |   |            |                             |   |            |                                  |   |            |                                 |     |              |                                  |
| 1                                       | Yes                                                                                  |                                                                                                                                                                                          |                                                                                                                                                                                                                                                                                                                                                                                                                                                                                                                                                                                                                    |   |                 |                   |                                         |            |                     |   |            |                    |   |            |                             |   |            |                                  |   |            |                                 |     |              |                                  |
| 0                                       | No                                                                                   |                                                                                                                                                                                          |                                                                                                                                                                                                                                                                                                                                                                                                                                                                                                                                                                                                                    |   |                 |                   |                                         |            |                     |   |            |                    |   |            |                             |   |            |                                  |   |            |                                 |     |              |                                  |
| 832                                     | <b>engaged</b><br>Show the field ONLY if:<br>[intake] = '1' OR [intake_ed] = '0'     | <b>Did the patient attend any healthcare appointments for their opioid use disorder within 30 days of their initial ED visit?</b>                                                        | <b>radio, Required</b><br><table border="1" data-bbox="1047 1438 1140 1543"> <tr> <td>1</td> <td>Yes</td> </tr> <tr> <td>0</td> <td>No</td> </tr> </table>                                                                                                                                                                                                                                                                                                                                                                                                                                                         | 1 | Yes             | 0                 | No                                      |            |                     |   |            |                    |   |            |                             |   |            |                                  |   |            |                                 |     |              |                                  |
| 1                                       | Yes                                                                                  |                                                                                                                                                                                          |                                                                                                                                                                                                                                                                                                                                                                                                                                                                                                                                                                                                                    |   |                 |                   |                                         |            |                     |   |            |                    |   |            |                             |   |            |                                  |   |            |                                 |     |              |                                  |
| 0                                       | No                                                                                   |                                                                                                                                                                                          |                                                                                                                                                                                                                                                                                                                                                                                                                                                                                                                                                                                                                    |   |                 |                   |                                         |            |                     |   |            |                    |   |            |                             |   |            |                                  |   |            |                                 |     |              |                                  |
| 833                                     | <b>outcome</b><br>Show the field ONLY if:<br>[intake] = '1' OR [intake_ed] = '0'     | <b>What was this patient's outcome after one month?</b>                                                                                                                                  | <b>checkbox, Required</b><br><table border="1" data-bbox="1047 1596 1526 2026"> <tr> <td>1</td> <td>outcome_1</td> <td>Lost to follow-up</td> </tr> <tr> <td>2</td> <td>outcome_2</td> <td>Still in SUD clinic</td> </tr> <tr> <td>3</td> <td>outcome_3</td> <td>Transferred to BIC</td> </tr> <tr> <td>4</td> <td>outcome_4</td> <td>Transferred to primary care</td> </tr> <tr> <td>5</td> <td>outcome_5</td> <td>Transferred to out-of-county MAT</td> </tr> <tr> <td>6</td> <td>outcome_6</td> <td>Transferred to methadone clinic</td> </tr> <tr> <td>7</td> <td>outcome_7</td> <td>Other</td> </tr> </table> | 1 | outcome_1       | Lost to follow-up | 2                                       | outcome_2  | Still in SUD clinic | 3 | outcome_3  | Transferred to BIC | 4 | outcome_4  | Transferred to primary care | 5 | outcome_5  | Transferred to out-of-county MAT | 6 | outcome_6  | Transferred to methadone clinic | 7   | outcome_7    | Other                            |
| 1                                       | outcome_1                                                                            | Lost to follow-up                                                                                                                                                                        |                                                                                                                                                                                                                                                                                                                                                                                                                                                                                                                                                                                                                    |   |                 |                   |                                         |            |                     |   |            |                    |   |            |                             |   |            |                                  |   |            |                                 |     |              |                                  |
| 2                                       | outcome_2                                                                            | Still in SUD clinic                                                                                                                                                                      |                                                                                                                                                                                                                                                                                                                                                                                                                                                                                                                                                                                                                    |   |                 |                   |                                         |            |                     |   |            |                    |   |            |                             |   |            |                                  |   |            |                                 |     |              |                                  |
| 3                                       | outcome_3                                                                            | Transferred to BIC                                                                                                                                                                       |                                                                                                                                                                                                                                                                                                                                                                                                                                                                                                                                                                                                                    |   |                 |                   |                                         |            |                     |   |            |                    |   |            |                             |   |            |                                  |   |            |                                 |     |              |                                  |
| 4                                       | outcome_4                                                                            | Transferred to primary care                                                                                                                                                              |                                                                                                                                                                                                                                                                                                                                                                                                                                                                                                                                                                                                                    |   |                 |                   |                                         |            |                     |   |            |                    |   |            |                             |   |            |                                  |   |            |                                 |     |              |                                  |
| 5                                       | outcome_5                                                                            | Transferred to out-of-county MAT                                                                                                                                                         |                                                                                                                                                                                                                                                                                                                                                                                                                                                                                                                                                                                                                    |   |                 |                   |                                         |            |                     |   |            |                    |   |            |                             |   |            |                                  |   |            |                                 |     |              |                                  |
| 6                                       | outcome_6                                                                            | Transferred to methadone clinic                                                                                                                                                          |                                                                                                                                                                                                                                                                                                                                                                                                                                                                                                                                                                                                                    |   |                 |                   |                                         |            |                     |   |            |                    |   |            |                             |   |            |                                  |   |            |                                 |     |              |                                  |
| 7                                       | outcome_7                                                                            | Other                                                                                                                                                                                    |                                                                                                                                                                                                                                                                                                                                                                                                                                                                                                                                                                                                                    |   |                 |                   |                                         |            |                     |   |            |                    |   |            |                             |   |            |                                  |   |            |                                 |     |              |                                  |

|                                                                              |                                                                       |                                                                                                                                                       |                                                                                                                                                                                                                                                                                                                                                                                                                                                                                                                                                                                                                                                                                                                                                                                                                                                                                                                                                                                                                                                            |   |                  |           |            |                  |                                          |   |                  |                                         |   |                  |                   |   |               |      |   |               |         |   |               |                     |   |               |      |   |               |          |    |                |         |    |                |                          |    |                |                              |    |                |                  |   |               |                   |
|------------------------------------------------------------------------------|-----------------------------------------------------------------------|-------------------------------------------------------------------------------------------------------------------------------------------------------|------------------------------------------------------------------------------------------------------------------------------------------------------------------------------------------------------------------------------------------------------------------------------------------------------------------------------------------------------------------------------------------------------------------------------------------------------------------------------------------------------------------------------------------------------------------------------------------------------------------------------------------------------------------------------------------------------------------------------------------------------------------------------------------------------------------------------------------------------------------------------------------------------------------------------------------------------------------------------------------------------------------------------------------------------------|---|------------------|-----------|------------|------------------|------------------------------------------|---|------------------|-----------------------------------------|---|------------------|-------------------|---|---------------|------|---|---------------|---------|---|---------------|---------------------|---|---------------|------|---|---------------|----------|----|----------------|---------|----|----------------|--------------------------|----|----------------|------------------------------|----|----------------|------------------|---|---------------|-------------------|
| 834                                                                          | <b>outcome_other</b><br>Show the field ONLY if:<br>[outcome(7)] = '1' | If "Other," please specify                                                                                                                            | text, Required                                                                                                                                                                                                                                                                                                                                                                                                                                                                                                                                                                                                                                                                                                                                                                                                                                                                                                                                                                                                                                             |   |                  |           |            |                  |                                          |   |                  |                                         |   |                  |                   |   |               |      |   |               |         |   |               |                     |   |               |      |   |               |          |    |                |         |    |                |                          |    |                |                              |    |                |                  |   |               |                   |
| 835                                                                          | <b>followup_complete</b>                                              | Section Header: <i>Form Status</i><br>Complete?                                                                                                       | dropdown<br><table border="1"> <tr> <td>0</td> <td>Incomplete</td> </tr> <tr> <td>1</td> <td>Unverified</td> </tr> <tr> <td>2</td> <td>Complete</td> </tr> </table>                                                                                                                                                                                                                                                                                                                                                                                                                                                                                                                                                                                                                                                                                                                                                                                                                                                                                        | 0 | Incomplete       | 1         | Unverified | 2                | Complete                                 |   |                  |                                         |   |                  |                   |   |               |      |   |               |         |   |               |                     |   |               |      |   |               |          |    |                |         |    |                |                          |    |                |                              |    |                |                  |   |               |                   |
| 0                                                                            | Incomplete                                                            |                                                                                                                                                       |                                                                                                                                                                                                                                                                                                                                                                                                                                                                                                                                                                                                                                                                                                                                                                                                                                                                                                                                                                                                                                                            |   |                  |           |            |                  |                                          |   |                  |                                         |   |                  |                   |   |               |      |   |               |         |   |               |                     |   |               |      |   |               |          |    |                |         |    |                |                          |    |                |                              |    |                |                  |   |               |                   |
| 1                                                                            | Unverified                                                            |                                                                                                                                                       |                                                                                                                                                                                                                                                                                                                                                                                                                                                                                                                                                                                                                                                                                                                                                                                                                                                                                                                                                                                                                                                            |   |                  |           |            |                  |                                          |   |                  |                                         |   |                  |                   |   |               |      |   |               |         |   |               |                     |   |               |      |   |               |          |    |                |         |    |                |                          |    |                |                              |    |                |                  |   |               |                   |
| 2                                                                            | Complete                                                              |                                                                                                                                                       |                                                                                                                                                                                                                                                                                                                                                                                                                                                                                                                                                                                                                                                                                                                                                                                                                                                                                                                                                                                                                                                            |   |                  |           |            |                  |                                          |   |                  |                                         |   |                  |                   |   |               |      |   |               |         |   |               |                     |   |               |      |   |               |          |    |                |         |    |                |                          |    |                |                              |    |                |                  |   |               |                   |
| <b>Instrument: Admission Discharge Summary (admission_discharge_summary)</b> |                                                                       |                                                                                                                                                       |                                                                                                                                                                                                                                                                                                                                                                                                                                                                                                                                                                                                                                                                                                                                                                                                                                                                                                                                                                                                                                                            |   |                  |           |            |                  |                                          |   |                  |                                         |   |                  |                   |   |               |      |   |               |         |   |               |                     |   |               |      |   |               |          |    |                |         |    |                |                          |    |                |                              |    |                |                  |   |               |                   |
| 836                                                                          | <b>admit_sedation</b><br>Show the field ONLY if:<br>[disp] = '2'      | Section Header: <i>Admit Sedation</i><br>Which of the following signs or symptoms of sedation were documented in the discharge summary notes?         | checkbox, Required<br><table border="1"> <tr> <td>1</td> <td>admit_sedation_1</td> <td>Nodding</td> </tr> <tr> <td>2</td> <td>admit_sedation_2</td> <td>Sleepy, drowsy, difficulty staying awake</td> </tr> <tr> <td>3</td> <td>admit_sedation_3</td> <td>Feelings of general fatigue or weakness</td> </tr> <tr> <td>0</td> <td>admit_sedation_0</td> <td>None of the above</td> </tr> </table>                                                                                                                                                                                                                                                                                                                                                                                                                                                                                                                                                                                                                                                           | 1 | admit_sedation_1 | Nodding   | 2          | admit_sedation_2 | Sleepy, drowsy, difficulty staying awake | 3 | admit_sedation_3 | Feelings of general fatigue or weakness | 0 | admit_sedation_0 | None of the above |   |               |      |   |               |         |   |               |                     |   |               |      |   |               |          |    |                |         |    |                |                          |    |                |                              |    |                |                  |   |               |                   |
| 1                                                                            | admit_sedation_1                                                      | Nodding                                                                                                                                               |                                                                                                                                                                                                                                                                                                                                                                                                                                                                                                                                                                                                                                                                                                                                                                                                                                                                                                                                                                                                                                                            |   |                  |           |            |                  |                                          |   |                  |                                         |   |                  |                   |   |               |      |   |               |         |   |               |                     |   |               |      |   |               |          |    |                |         |    |                |                          |    |                |                              |    |                |                  |   |               |                   |
| 2                                                                            | admit_sedation_2                                                      | Sleepy, drowsy, difficulty staying awake                                                                                                              |                                                                                                                                                                                                                                                                                                                                                                                                                                                                                                                                                                                                                                                                                                                                                                                                                                                                                                                                                                                                                                                            |   |                  |           |            |                  |                                          |   |                  |                                         |   |                  |                   |   |               |      |   |               |         |   |               |                     |   |               |      |   |               |          |    |                |         |    |                |                          |    |                |                              |    |                |                  |   |               |                   |
| 3                                                                            | admit_sedation_3                                                      | Feelings of general fatigue or weakness                                                                                                               |                                                                                                                                                                                                                                                                                                                                                                                                                                                                                                                                                                                                                                                                                                                                                                                                                                                                                                                                                                                                                                                            |   |                  |           |            |                  |                                          |   |                  |                                         |   |                  |                   |   |               |      |   |               |         |   |               |                     |   |               |      |   |               |          |    |                |         |    |                |                          |    |                |                              |    |                |                  |   |               |                   |
| 0                                                                            | admit_sedation_0                                                      | None of the above                                                                                                                                     |                                                                                                                                                                                                                                                                                                                                                                                                                                                                                                                                                                                                                                                                                                                                                                                                                                                                                                                                                                                                                                                            |   |                  |           |            |                  |                                          |   |                  |                                         |   |                  |                   |   |               |      |   |               |         |   |               |                     |   |               |      |   |               |          |    |                |         |    |                |                          |    |                |                              |    |                |                  |   |               |                   |
| 837                                                                          | <b>admit_intox</b><br>Show the field ONLY if:<br>[disp] = '2'         | Section Header: <i>Admit Intoxication</i><br>Which of the following signs or symptoms of intoxication were documented in the discharge summary notes? | checkbox, Required<br><table border="1"> <tr> <td>1</td> <td>admit_intox_1</td> <td>Good mood</td> </tr> <tr> <td>2</td> <td>admit_intox_2</td> <td>Coasting (Spaced out)</td> </tr> <tr> <td>3</td> <td>admit_intox_3</td> <td>Pleasant Sick</td> </tr> <tr> <td>4</td> <td>admit_intox_4</td> <td>Drive (energy)</td> </tr> <tr> <td>5</td> <td>admit_intox_5</td> <td>High</td> </tr> <tr> <td>6</td> <td>admit_intox_6</td> <td>Drunken</td> </tr> <tr> <td>7</td> <td>admit_intox_7</td> <td>Soapbox (talkative)</td> </tr> <tr> <td>8</td> <td>admit_intox_8</td> <td>Rush</td> </tr> <tr> <td>9</td> <td>admit_intox_9</td> <td>Friendly</td> </tr> <tr> <td>10</td> <td>admit_intox_10</td> <td>Relaxed</td> </tr> <tr> <td>11</td> <td>admit_intox_11</td> <td>Difficulty concentrating</td> </tr> <tr> <td>12</td> <td>admit_intox_12</td> <td>Feeling lightheaded or dizzy</td> </tr> <tr> <td>13</td> <td>admit_intox_13</td> <td>Feeling confused</td> </tr> <tr> <td>0</td> <td>admit_intox_0</td> <td>None of the above</td> </tr> </table> | 1 | admit_intox_1    | Good mood | 2          | admit_intox_2    | Coasting (Spaced out)                    | 3 | admit_intox_3    | Pleasant Sick                           | 4 | admit_intox_4    | Drive (energy)    | 5 | admit_intox_5 | High | 6 | admit_intox_6 | Drunken | 7 | admit_intox_7 | Soapbox (talkative) | 8 | admit_intox_8 | Rush | 9 | admit_intox_9 | Friendly | 10 | admit_intox_10 | Relaxed | 11 | admit_intox_11 | Difficulty concentrating | 12 | admit_intox_12 | Feeling lightheaded or dizzy | 13 | admit_intox_13 | Feeling confused | 0 | admit_intox_0 | None of the above |
| 1                                                                            | admit_intox_1                                                         | Good mood                                                                                                                                             |                                                                                                                                                                                                                                                                                                                                                                                                                                                                                                                                                                                                                                                                                                                                                                                                                                                                                                                                                                                                                                                            |   |                  |           |            |                  |                                          |   |                  |                                         |   |                  |                   |   |               |      |   |               |         |   |               |                     |   |               |      |   |               |          |    |                |         |    |                |                          |    |                |                              |    |                |                  |   |               |                   |
| 2                                                                            | admit_intox_2                                                         | Coasting (Spaced out)                                                                                                                                 |                                                                                                                                                                                                                                                                                                                                                                                                                                                                                                                                                                                                                                                                                                                                                                                                                                                                                                                                                                                                                                                            |   |                  |           |            |                  |                                          |   |                  |                                         |   |                  |                   |   |               |      |   |               |         |   |               |                     |   |               |      |   |               |          |    |                |         |    |                |                          |    |                |                              |    |                |                  |   |               |                   |
| 3                                                                            | admit_intox_3                                                         | Pleasant Sick                                                                                                                                         |                                                                                                                                                                                                                                                                                                                                                                                                                                                                                                                                                                                                                                                                                                                                                                                                                                                                                                                                                                                                                                                            |   |                  |           |            |                  |                                          |   |                  |                                         |   |                  |                   |   |               |      |   |               |         |   |               |                     |   |               |      |   |               |          |    |                |         |    |                |                          |    |                |                              |    |                |                  |   |               |                   |
| 4                                                                            | admit_intox_4                                                         | Drive (energy)                                                                                                                                        |                                                                                                                                                                                                                                                                                                                                                                                                                                                                                                                                                                                                                                                                                                                                                                                                                                                                                                                                                                                                                                                            |   |                  |           |            |                  |                                          |   |                  |                                         |   |                  |                   |   |               |      |   |               |         |   |               |                     |   |               |      |   |               |          |    |                |         |    |                |                          |    |                |                              |    |                |                  |   |               |                   |
| 5                                                                            | admit_intox_5                                                         | High                                                                                                                                                  |                                                                                                                                                                                                                                                                                                                                                                                                                                                                                                                                                                                                                                                                                                                                                                                                                                                                                                                                                                                                                                                            |   |                  |           |            |                  |                                          |   |                  |                                         |   |                  |                   |   |               |      |   |               |         |   |               |                     |   |               |      |   |               |          |    |                |         |    |                |                          |    |                |                              |    |                |                  |   |               |                   |
| 6                                                                            | admit_intox_6                                                         | Drunken                                                                                                                                               |                                                                                                                                                                                                                                                                                                                                                                                                                                                                                                                                                                                                                                                                                                                                                                                                                                                                                                                                                                                                                                                            |   |                  |           |            |                  |                                          |   |                  |                                         |   |                  |                   |   |               |      |   |               |         |   |               |                     |   |               |      |   |               |          |    |                |         |    |                |                          |    |                |                              |    |                |                  |   |               |                   |
| 7                                                                            | admit_intox_7                                                         | Soapbox (talkative)                                                                                                                                   |                                                                                                                                                                                                                                                                                                                                                                                                                                                                                                                                                                                                                                                                                                                                                                                                                                                                                                                                                                                                                                                            |   |                  |           |            |                  |                                          |   |                  |                                         |   |                  |                   |   |               |      |   |               |         |   |               |                     |   |               |      |   |               |          |    |                |         |    |                |                          |    |                |                              |    |                |                  |   |               |                   |
| 8                                                                            | admit_intox_8                                                         | Rush                                                                                                                                                  |                                                                                                                                                                                                                                                                                                                                                                                                                                                                                                                                                                                                                                                                                                                                                                                                                                                                                                                                                                                                                                                            |   |                  |           |            |                  |                                          |   |                  |                                         |   |                  |                   |   |               |      |   |               |         |   |               |                     |   |               |      |   |               |          |    |                |         |    |                |                          |    |                |                              |    |                |                  |   |               |                   |
| 9                                                                            | admit_intox_9                                                         | Friendly                                                                                                                                              |                                                                                                                                                                                                                                                                                                                                                                                                                                                                                                                                                                                                                                                                                                                                                                                                                                                                                                                                                                                                                                                            |   |                  |           |            |                  |                                          |   |                  |                                         |   |                  |                   |   |               |      |   |               |         |   |               |                     |   |               |      |   |               |          |    |                |         |    |                |                          |    |                |                              |    |                |                  |   |               |                   |
| 10                                                                           | admit_intox_10                                                        | Relaxed                                                                                                                                               |                                                                                                                                                                                                                                                                                                                                                                                                                                                                                                                                                                                                                                                                                                                                                                                                                                                                                                                                                                                                                                                            |   |                  |           |            |                  |                                          |   |                  |                                         |   |                  |                   |   |               |      |   |               |         |   |               |                     |   |               |      |   |               |          |    |                |         |    |                |                          |    |                |                              |    |                |                  |   |               |                   |
| 11                                                                           | admit_intox_11                                                        | Difficulty concentrating                                                                                                                              |                                                                                                                                                                                                                                                                                                                                                                                                                                                                                                                                                                                                                                                                                                                                                                                                                                                                                                                                                                                                                                                            |   |                  |           |            |                  |                                          |   |                  |                                         |   |                  |                   |   |               |      |   |               |         |   |               |                     |   |               |      |   |               |          |    |                |         |    |                |                          |    |                |                              |    |                |                  |   |               |                   |
| 12                                                                           | admit_intox_12                                                        | Feeling lightheaded or dizzy                                                                                                                          |                                                                                                                                                                                                                                                                                                                                                                                                                                                                                                                                                                                                                                                                                                                                                                                                                                                                                                                                                                                                                                                            |   |                  |           |            |                  |                                          |   |                  |                                         |   |                  |                   |   |               |      |   |               |         |   |               |                     |   |               |      |   |               |          |    |                |         |    |                |                          |    |                |                              |    |                |                  |   |               |                   |
| 13                                                                           | admit_intox_13                                                        | Feeling confused                                                                                                                                      |                                                                                                                                                                                                                                                                                                                                                                                                                                                                                                                                                                                                                                                                                                                                                                                                                                                                                                                                                                                                                                                            |   |                  |           |            |                  |                                          |   |                  |                                         |   |                  |                   |   |               |      |   |               |         |   |               |                     |   |               |      |   |               |          |    |                |         |    |                |                          |    |                |                              |    |                |                  |   |               |                   |
| 0                                                                            | admit_intox_0                                                         | None of the above                                                                                                                                     |                                                                                                                                                                                                                                                                                                                                                                                                                                                                                                                                                                                                                                                                                                                                                                                                                                                                                                                                                                                                                                                            |   |                  |           |            |                  |                                          |   |                  |                                         |   |                  |                   |   |               |      |   |               |         |   |               |                     |   |               |      |   |               |          |    |                |         |    |                |                          |    |                |                              |    |                |                  |   |               |                   |

|     |                                                                    |                                                                                                                                                                     |                                                                                                                                                                                                                                                                                                                                                                                                                                                                                                                                                                                                                                                                                                                                                                                                                 |   |                    |                                     |   |                    |                                       |   |                    |             |   |                    |                        |   |                    |                                                    |   |                    |                                                         |   |                    |                                                |   |                    |                   |
|-----|--------------------------------------------------------------------|---------------------------------------------------------------------------------------------------------------------------------------------------------------------|-----------------------------------------------------------------------------------------------------------------------------------------------------------------------------------------------------------------------------------------------------------------------------------------------------------------------------------------------------------------------------------------------------------------------------------------------------------------------------------------------------------------------------------------------------------------------------------------------------------------------------------------------------------------------------------------------------------------------------------------------------------------------------------------------------------------|---|--------------------|-------------------------------------|---|--------------------|---------------------------------------|---|--------------------|-------------|---|--------------------|------------------------|---|--------------------|----------------------------------------------------|---|--------------------|---------------------------------------------------------|---|--------------------|------------------------------------------------|---|--------------------|-------------------|
| 838 | <b>admit_gi</b><br>Show the field ONLY if:<br>[disp] = '2'         | <b>Section Header:</b> <i>Admit GI Symptoms</i><br><b>Which of the following gastrointestinal signs or symptoms were documented in the discharge summary notes?</b> | <b>checkbox, Required</b><br><table border="1"> <tr> <td>1</td> <td>admit_gi_1</td> <td>Constipation</td> </tr> <tr> <td>2</td> <td>admit_gi_2</td> <td>Turning of stomach</td> </tr> <tr> <td>3</td> <td>admit_gi_3</td> <td>Nausea</td> </tr> <tr> <td>4</td> <td>admit_gi_4</td> <td>Vomiting</td> </tr> <tr> <td>5</td> <td>admit_gi_5</td> <td>Diarrhea</td> </tr> <tr> <td>0</td> <td>admit_gi_0</td> <td>None of the above</td> </tr> </table>                                                                                                                                                                                                                                                                                                                                                           | 1 | admit_gi_1         | Constipation                        | 2 | admit_gi_2         | Turning of stomach                    | 3 | admit_gi_3         | Nausea      | 4 | admit_gi_4         | Vomiting               | 5 | admit_gi_5         | Diarrhea                                           | 0 | admit_gi_0         | None of the above                                       |   |                    |                                                |   |                    |                   |
| 1   | admit_gi_1                                                         | Constipation                                                                                                                                                        |                                                                                                                                                                                                                                                                                                                                                                                                                                                                                                                                                                                                                                                                                                                                                                                                                 |   |                    |                                     |   |                    |                                       |   |                    |             |   |                    |                        |   |                    |                                                    |   |                    |                                                         |   |                    |                                                |   |                    |                   |
| 2   | admit_gi_2                                                         | Turning of stomach                                                                                                                                                  |                                                                                                                                                                                                                                                                                                                                                                                                                                                                                                                                                                                                                                                                                                                                                                                                                 |   |                    |                                     |   |                    |                                       |   |                    |             |   |                    |                        |   |                    |                                                    |   |                    |                                                         |   |                    |                                                |   |                    |                   |
| 3   | admit_gi_3                                                         | Nausea                                                                                                                                                              |                                                                                                                                                                                                                                                                                                                                                                                                                                                                                                                                                                                                                                                                                                                                                                                                                 |   |                    |                                     |   |                    |                                       |   |                    |             |   |                    |                        |   |                    |                                                    |   |                    |                                                         |   |                    |                                                |   |                    |                   |
| 4   | admit_gi_4                                                         | Vomiting                                                                                                                                                            |                                                                                                                                                                                                                                                                                                                                                                                                                                                                                                                                                                                                                                                                                                                                                                                                                 |   |                    |                                     |   |                    |                                       |   |                    |             |   |                    |                        |   |                    |                                                    |   |                    |                                                         |   |                    |                                                |   |                    |                   |
| 5   | admit_gi_5                                                         | Diarrhea                                                                                                                                                            |                                                                                                                                                                                                                                                                                                                                                                                                                                                                                                                                                                                                                                                                                                                                                                                                                 |   |                    |                                     |   |                    |                                       |   |                    |             |   |                    |                        |   |                    |                                                    |   |                    |                                                         |   |                    |                                                |   |                    |                   |
| 0   | admit_gi_0                                                         | None of the above                                                                                                                                                   |                                                                                                                                                                                                                                                                                                                                                                                                                                                                                                                                                                                                                                                                                                                                                                                                                 |   |                    |                                     |   |                    |                                       |   |                    |             |   |                    |                        |   |                    |                                                    |   |                    |                                                         |   |                    |                                                |   |                    |                   |
| 839 | <b>admit_anxious</b><br>Show the field ONLY if:<br>[disp] = '2'    | <b>Section Header:</b> <i>Admit Anxiety</i><br><b>Which of the following signs or symptoms of anxiety were documented in the discharge summary notes?</b>           | <b>checkbox, Required</b><br><table border="1"> <tr> <td>1</td> <td>admit_anxious_1</td> <td>Anxiety, irritability, or agitation</td> </tr> <tr> <td>2</td> <td>admit_anxious_2</td> <td>Nervousness</td> </tr> <tr> <td>3</td> <td>admit_anxious_3</td> <td>Tremor</td> </tr> <tr> <td>4</td> <td>admit_anxious_4</td> <td>Restlessness</td> </tr> <tr> <td>0</td> <td>admit_anxious_0</td> <td>None of the above</td> </tr> </table>                                                                                                                                                                                                                                                                                                                                                                          | 1 | admit_anxious_1    | Anxiety, irritability, or agitation | 2 | admit_anxious_2    | Nervousness                           | 3 | admit_anxious_3    | Tremor      | 4 | admit_anxious_4    | Restlessness           | 0 | admit_anxious_0    | None of the above                                  |   |                    |                                                         |   |                    |                                                |   |                    |                   |
| 1   | admit_anxious_1                                                    | Anxiety, irritability, or agitation                                                                                                                                 |                                                                                                                                                                                                                                                                                                                                                                                                                                                                                                                                                                                                                                                                                                                                                                                                                 |   |                    |                                     |   |                    |                                       |   |                    |             |   |                    |                        |   |                    |                                                    |   |                    |                                                         |   |                    |                                                |   |                    |                   |
| 2   | admit_anxious_2                                                    | Nervousness                                                                                                                                                         |                                                                                                                                                                                                                                                                                                                                                                                                                                                                                                                                                                                                                                                                                                                                                                                                                 |   |                    |                                     |   |                    |                                       |   |                    |             |   |                    |                        |   |                    |                                                    |   |                    |                                                         |   |                    |                                                |   |                    |                   |
| 3   | admit_anxious_3                                                    | Tremor                                                                                                                                                              |                                                                                                                                                                                                                                                                                                                                                                                                                                                                                                                                                                                                                                                                                                                                                                                                                 |   |                    |                                     |   |                    |                                       |   |                    |             |   |                    |                        |   |                    |                                                    |   |                    |                                                         |   |                    |                                                |   |                    |                   |
| 4   | admit_anxious_4                                                    | Restlessness                                                                                                                                                        |                                                                                                                                                                                                                                                                                                                                                                                                                                                                                                                                                                                                                                                                                                                                                                                                                 |   |                    |                                     |   |                    |                                       |   |                    |             |   |                    |                        |   |                    |                                                    |   |                    |                                                         |   |                    |                                                |   |                    |                   |
| 0   | admit_anxious_0                                                    | None of the above                                                                                                                                                   |                                                                                                                                                                                                                                                                                                                                                                                                                                                                                                                                                                                                                                                                                                                                                                                                                 |   |                    |                                     |   |                    |                                       |   |                    |             |   |                    |                        |   |                    |                                                    |   |                    |                                                         |   |                    |                                                |   |                    |                   |
| 840 | <b>admit_withdrawal</b><br>Show the field ONLY if:<br>[disp] = '2' | <b>Section Header:</b> <i>Admit Withdrawal</i><br><b>Which of the following signs or symptoms of withdrawal were documented in the discharge summary notes?</b>     | <b>checkbox, Required</b><br><table border="1"> <tr> <td>1</td> <td>admit_withdrawal 1</td> <td>Yawning</td> </tr> <tr> <td>2</td> <td>admit_withdrawal 2</td> <td>Gooseflesh skin (chills/piloerection)</td> </tr> <tr> <td>3</td> <td>admit_withdrawal 3</td> <td>Pulse &gt; 80</td> </tr> <tr> <td>4</td> <td>admit_withdrawal 4</td> <td>Sweating (diaphoresis)</td> </tr> <tr> <td>5</td> <td>admit_withdrawal 5</td> <td>Pupil size larger than normal (dilation/mydriasis)</td> </tr> <tr> <td>6</td> <td>admit_withdrawal 6</td> <td>Bone, joint aches, or body aches (arthralgias/myalgias)</td> </tr> <tr> <td>7</td> <td>admit_withdrawal 7</td> <td>Runny nose or tearing (rhinorrhea/lacrimation)</td> </tr> <tr> <td>0</td> <td>admit_withdrawal 0</td> <td>None of the above</td> </tr> </table> | 1 | admit_withdrawal 1 | Yawning                             | 2 | admit_withdrawal 2 | Gooseflesh skin (chills/piloerection) | 3 | admit_withdrawal 3 | Pulse > 80  | 4 | admit_withdrawal 4 | Sweating (diaphoresis) | 5 | admit_withdrawal 5 | Pupil size larger than normal (dilation/mydriasis) | 6 | admit_withdrawal 6 | Bone, joint aches, or body aches (arthralgias/myalgias) | 7 | admit_withdrawal 7 | Runny nose or tearing (rhinorrhea/lacrimation) | 0 | admit_withdrawal 0 | None of the above |
| 1   | admit_withdrawal 1                                                 | Yawning                                                                                                                                                             |                                                                                                                                                                                                                                                                                                                                                                                                                                                                                                                                                                                                                                                                                                                                                                                                                 |   |                    |                                     |   |                    |                                       |   |                    |             |   |                    |                        |   |                    |                                                    |   |                    |                                                         |   |                    |                                                |   |                    |                   |
| 2   | admit_withdrawal 2                                                 | Gooseflesh skin (chills/piloerection)                                                                                                                               |                                                                                                                                                                                                                                                                                                                                                                                                                                                                                                                                                                                                                                                                                                                                                                                                                 |   |                    |                                     |   |                    |                                       |   |                    |             |   |                    |                        |   |                    |                                                    |   |                    |                                                         |   |                    |                                                |   |                    |                   |
| 3   | admit_withdrawal 3                                                 | Pulse > 80                                                                                                                                                          |                                                                                                                                                                                                                                                                                                                                                                                                                                                                                                                                                                                                                                                                                                                                                                                                                 |   |                    |                                     |   |                    |                                       |   |                    |             |   |                    |                        |   |                    |                                                    |   |                    |                                                         |   |                    |                                                |   |                    |                   |
| 4   | admit_withdrawal 4                                                 | Sweating (diaphoresis)                                                                                                                                              |                                                                                                                                                                                                                                                                                                                                                                                                                                                                                                                                                                                                                                                                                                                                                                                                                 |   |                    |                                     |   |                    |                                       |   |                    |             |   |                    |                        |   |                    |                                                    |   |                    |                                                         |   |                    |                                                |   |                    |                   |
| 5   | admit_withdrawal 5                                                 | Pupil size larger than normal (dilation/mydriasis)                                                                                                                  |                                                                                                                                                                                                                                                                                                                                                                                                                                                                                                                                                                                                                                                                                                                                                                                                                 |   |                    |                                     |   |                    |                                       |   |                    |             |   |                    |                        |   |                    |                                                    |   |                    |                                                         |   |                    |                                                |   |                    |                   |
| 6   | admit_withdrawal 6                                                 | Bone, joint aches, or body aches (arthralgias/myalgias)                                                                                                             |                                                                                                                                                                                                                                                                                                                                                                                                                                                                                                                                                                                                                                                                                                                                                                                                                 |   |                    |                                     |   |                    |                                       |   |                    |             |   |                    |                        |   |                    |                                                    |   |                    |                                                         |   |                    |                                                |   |                    |                   |
| 7   | admit_withdrawal 7                                                 | Runny nose or tearing (rhinorrhea/lacrimation)                                                                                                                      |                                                                                                                                                                                                                                                                                                                                                                                                                                                                                                                                                                                                                                                                                                                                                                                                                 |   |                    |                                     |   |                    |                                       |   |                    |             |   |                    |                        |   |                    |                                                    |   |                    |                                                         |   |                    |                                                |   |                    |                   |
| 0   | admit_withdrawal 0                                                 | None of the above                                                                                                                                                   |                                                                                                                                                                                                                                                                                                                                                                                                                                                                                                                                                                                                                                                                                                                                                                                                                 |   |                    |                                     |   |                    |                                       |   |                    |             |   |                    |                        |   |                    |                                                    |   |                    |                                                         |   |                    |                                                |   |                    |                   |
| 841 | <b>admit_vitals</b><br>Show the field ONLY if:<br>[disp] = '2'     | <b>Section Header:</b> <i>Admit Abnormal Vitals</i><br><b>Which of the following abnormal vital signs were documented in the discharge summary notes?</b>           | <b>checkbox, Required</b><br><table border="1"> <tr> <td>1</td> <td>admit_vitals_1</td> <td>Hypoxia</td> </tr> <tr> <td>2</td> <td>admit_vitals_2</td> <td>Hypercarbia</td> </tr> <tr> <td>3</td> <td>admit_vitals_3</td> <td>Hypotension</td> </tr> <tr> <td>4</td> <td>admit_vitals_4</td> <td>Bradycardia</td> </tr> <tr> <td>0</td> <td>admit_vitals_0</td> <td>None of the above</td> </tr> </table>                                                                                                                                                                                                                                                                                                                                                                                                       | 1 | admit_vitals_1     | Hypoxia                             | 2 | admit_vitals_2     | Hypercarbia                           | 3 | admit_vitals_3     | Hypotension | 4 | admit_vitals_4     | Bradycardia            | 0 | admit_vitals_0     | None of the above                                  |   |                    |                                                         |   |                    |                                                |   |                    |                   |
| 1   | admit_vitals_1                                                     | Hypoxia                                                                                                                                                             |                                                                                                                                                                                                                                                                                                                                                                                                                                                                                                                                                                                                                                                                                                                                                                                                                 |   |                    |                                     |   |                    |                                       |   |                    |             |   |                    |                        |   |                    |                                                    |   |                    |                                                         |   |                    |                                                |   |                    |                   |
| 2   | admit_vitals_2                                                     | Hypercarbia                                                                                                                                                         |                                                                                                                                                                                                                                                                                                                                                                                                                                                                                                                                                                                                                                                                                                                                                                                                                 |   |                    |                                     |   |                    |                                       |   |                    |             |   |                    |                        |   |                    |                                                    |   |                    |                                                         |   |                    |                                                |   |                    |                   |
| 3   | admit_vitals_3                                                     | Hypotension                                                                                                                                                         |                                                                                                                                                                                                                                                                                                                                                                                                                                                                                                                                                                                                                                                                                                                                                                                                                 |   |                    |                                     |   |                    |                                       |   |                    |             |   |                    |                        |   |                    |                                                    |   |                    |                                                         |   |                    |                                                |   |                    |                   |
| 4   | admit_vitals_4                                                     | Bradycardia                                                                                                                                                         |                                                                                                                                                                                                                                                                                                                                                                                                                                                                                                                                                                                                                                                                                                                                                                                                                 |   |                    |                                     |   |                    |                                       |   |                    |             |   |                    |                        |   |                    |                                                    |   |                    |                                                         |   |                    |                                                |   |                    |                   |
| 0   | admit_vitals_0                                                     | None of the above                                                                                                                                                   |                                                                                                                                                                                                                                                                                                                                                                                                                                                                                                                                                                                                                                                                                                                                                                                                                 |   |                    |                                     |   |                    |                                       |   |                    |             |   |                    |                        |   |                    |                                                    |   |                    |                                                         |   |                    |                                                |   |                    |                   |

|                                                                 |                                                              |                                                                                                                                                                                         |                                                         |                 |                                                      |
|-----------------------------------------------------------------|--------------------------------------------------------------|-----------------------------------------------------------------------------------------------------------------------------------------------------------------------------------------|---------------------------------------------------------|-----------------|------------------------------------------------------|
| 842                                                             | admit_misc_sx<br><br>Show the field ONLY if:<br>[disp] = '2' | Section Header: Admit Miscellaneous Opioid-Related Side Effects<br><br>Which of the following miscellaneous opioid related side effects were documented in the discharge summary notes? | checkbox, Required                                      |                 |                                                      |
|                                                                 |                                                              |                                                                                                                                                                                         | 1                                                       | admit_misc_sx_1 | Difficulty passing urine                             |
|                                                                 |                                                              |                                                                                                                                                                                         | 2                                                       | admit_misc_sx_2 | Itchiness                                            |
|                                                                 |                                                              |                                                                                                                                                                                         | 3                                                       | admit_misc_sx_3 | Dry mouth                                            |
|                                                                 |                                                              |                                                                                                                                                                                         | 4                                                       | admit_misc_sx_4 | Headache                                             |
|                                                                 |                                                              |                                                                                                                                                                                         | 5                                                       | admit_misc_sx_5 | Unable to walk                                       |
|                                                                 |                                                              |                                                                                                                                                                                         | 6                                                       | admit_misc_sx_6 | Unable to discharge                                  |
|                                                                 |                                                              |                                                                                                                                                                                         | 7                                                       | admit_misc_sx_7 | Pupil size smaller than normal (constriction/miosis) |
| 0                                                               | admit_misc_sx_0                                              | None of the above                                                                                                                                                                       |                                                         |                 |                                                      |
| 843                                                             | admit_death<br><br>Show the field ONLY if:<br>[disp] = '2'   | Section Header: Admit Death<br><br>Did the discharge summary notes indicate that the patient died?                                                                                      | yesno, Required                                         |                 |                                                      |
|                                                                 |                                                              |                                                                                                                                                                                         | 1                                                       | Yes             |                                                      |
|                                                                 |                                                              |                                                                                                                                                                                         | 0                                                       | No              |                                                      |
| 844                                                             | admission_discharge_summary_complete                         | Section Header: Form Status<br><br>Complete?                                                                                                                                            | dropdown                                                |                 |                                                      |
|                                                                 |                                                              |                                                                                                                                                                                         | 0                                                       | Incomplete      |                                                      |
|                                                                 |                                                              |                                                                                                                                                                                         | 1                                                       | Unverified      |                                                      |
|                                                                 |                                                              |                                                                                                                                                                                         | 2                                                       | Complete        |                                                      |
| <b>Instrument: Pre-Bup Chart Scoring (prebup_chart_scoring)</b> |                                                              |                                                                                                                                                                                         |                                                         |                 |                                                      |
| 845                                                             | agonist_1_pre                                                | Section Header: Opiate 32 (16 Agonist)<br><br>Nodding                                                                                                                                   | calc<br>Calculation: if([prebup_sedation(1)] = 1, 1, 0) |                 |                                                      |
| 846                                                             | agonist_2_pre                                                | Sleepy                                                                                                                                                                                  | calc<br>Calculation: if([prebup_sedation(2)] = 1, 1, 0) |                 |                                                      |
| 847                                                             | agonist_3_pre                                                | Good mood                                                                                                                                                                               | calc<br>Calculation: if([prebup_intox(1)] = 1, 1, 0)    |                 |                                                      |
| 848                                                             | agonist_4_pre                                                | Coasting                                                                                                                                                                                | calc<br>Calculation: if([prebup_intox(2)] = 1, 1, 0)    |                 |                                                      |
| 849                                                             | agonist_5_pre                                                | Pleasant Sick                                                                                                                                                                           | calc<br>Calculation: if([prebup_intox(3)] = 1, 1, 0)    |                 |                                                      |
| 850                                                             | agonist_6_pre                                                | Drive                                                                                                                                                                                   | calc<br>Calculation: if([prebup_intox(4)] = 1, 1, 0)    |                 |                                                      |
| 851                                                             | agonist_7_pre                                                | High                                                                                                                                                                                    | calc<br>Calculation: if([prebup_intox(5)] = 1, 1, 0)    |                 |                                                      |
| 852                                                             | agonist_8_pre                                                | Drunken                                                                                                                                                                                 | calc<br>Calculation: if([prebup_intox(6)] = 1, 1, 0)    |                 |                                                      |
| 853                                                             | agonist_9_pre                                                | Soapbox                                                                                                                                                                                 | calc<br>Calculation: if([prebup_intox(7)] = 1, 1, 0)    |                 |                                                      |
| 854                                                             | agonist_10_pre                                               | Rush                                                                                                                                                                                    | calc<br>Calculation: if([prebup_intox(8)] = 1, 1, 0)    |                 |                                                      |
| 855                                                             | agonist_11_pre                                               | Friendly                                                                                                                                                                                | calc<br>Calculation: if([prebup_intox(9)] = 1, 1, 0)    |                 |                                                      |
| 856                                                             | agonist_12_pre                                               | Relaxed                                                                                                                                                                                 | calc<br>Calculation: if([prebup_intox(10)] = 1, 1, 0)   |                 |                                                      |

|     |                    |                                                            |                                                                                                                                                                                                                                                                                                                 |
|-----|--------------------|------------------------------------------------------------|-----------------------------------------------------------------------------------------------------------------------------------------------------------------------------------------------------------------------------------------------------------------------------------------------------------------|
| 857 | agonist_13_pre     | Turning of stomach                                         | calc<br>Calculation: if([prebup_gi(2)] = 1, 1, 0)                                                                                                                                                                                                                                                               |
| 858 | agonist_14_pre     | Nervousness                                                | calc<br>Calculation: if([prebup_anxious(2)] = 1, 1, 0)                                                                                                                                                                                                                                                          |
| 859 | agonist_15_pre     | Itchy                                                      | calc<br>Calculation: if([prebup_misc_sx(2)] = 1, 1, 0)                                                                                                                                                                                                                                                          |
| 860 | agonist_16_pre     | Dry mouth                                                  | calc<br>Calculation: if([prebup_misc_sx(3)] = 1, 1, 0)                                                                                                                                                                                                                                                          |
| 861 | sum_agonist_pre    | Sum Agonist 16                                             | calc<br>Calculation: sum([agonist_1_pre], [agonist_2_pre], [agonist_3_pre], [agonist_4_pre], [agonist_5_pre], [agonist_6_pre], [agonist_7_pre], [agonist_8_pre], [agonist_9_pre], [agonist_10_pre], [agonist_11_pre], [agonist_12_pre], [agonist_13_pre], [agonist_14_pre], [agonist_15_pre], [agonist_16_pre]) |
| 862 | antagonist_1_pre   | Section Header: <i>Opiate 32 (Antagonist 9)</i><br>Yawning | calc<br>Calculation: if([prebup_withdrawal(1)] = 1, 1, 0)                                                                                                                                                                                                                                                       |
| 863 | antagonist_2_pre   | Restlessness                                               | calc<br>Calculation: if([prebup_anxious(4)] = 1, 1, 0)                                                                                                                                                                                                                                                          |
| 864 | antagonist_3_pre   | Tearing or Runny Nose                                      | calc<br>Calculation: if([prebup_withdrawal(7)] = 1, 1, 0)                                                                                                                                                                                                                                                       |
| 865 | antagonist_4_pre   | Turning of stomach/cramping/abdominal pain                 | calc<br>Calculation: if([prebup_gi(2)] = 1, 1, 0)                                                                                                                                                                                                                                                               |
| 866 | antagonist_5_pre   | Anxiety, irritability, or agitation                        | calc<br>Calculation: if([prebup_anxious(1)] = 1, 1, 0)                                                                                                                                                                                                                                                          |
| 867 | antagonist_6_pre   | Chills or gooseflesh skin                                  | calc<br>Calculation: if([prebup_withdrawal(2)] = 1, 1, 0)                                                                                                                                                                                                                                                       |
| 868 | antagonist_7_pre   | Sweating                                                   | calc<br>Calculation: if([prebup_withdrawal(4)] = 1, 1, 0)                                                                                                                                                                                                                                                       |
| 869 | antagonist_8_pre   | Bone, joint, or body aches                                 | calc<br>Calculation: if([prebup_withdrawal(6)] = 1, 1, 0)                                                                                                                                                                                                                                                       |
| 870 | antagonist_9_pre   | Feelings of general fatigue or weakness                    | calc<br>Calculation: if([prebup_sedation(3)] = 1, 1, 0)                                                                                                                                                                                                                                                         |
| 871 | sum_antagonist_pre | Sum antagonist 9                                           | calc<br>Calculation: sum([antagonist_1_pre], [antagonist_2_pre], [antagonist_3_pre], [antagonist_4_pre], [antagonist_5_pre], [antagonist_6_pre], [antagonist_7_pre], [antagonist_8_pre], [antagonist_9_pre])                                                                                                    |
| 872 | orsds_1_pre        | Section Header: <i>OR-SDS</i><br>Nausea                    | calc<br>Calculation: if([prebup_gi(3)] = 1, 1, 0)                                                                                                                                                                                                                                                               |
| 873 | orsds_2_pre        | Vomiting                                                   | calc<br>Calculation: if([prebup_gi(4)] = 1, 1, 0)                                                                                                                                                                                                                                                               |

|     |               |                                                       |                                                                                                                                                                                                                 |
|-----|---------------|-------------------------------------------------------|-----------------------------------------------------------------------------------------------------------------------------------------------------------------------------------------------------------------|
| 874 | orsds_3_pre   | Constipation                                          | calc<br>Calculation: if([prebup_gi(1)] = 1, 1, 0)                                                                                                                                                               |
| 875 | orsds_4_pre   | Difficulty passing urine                              | calc<br>Calculation: if([prebup_misc_sx(1)] = 1, 1, 0)                                                                                                                                                          |
| 876 | orsds_5_pre   | Difficulty concentrating                              | calc<br>Calculation: if([prebup_intox(11)] = 1, 1, 0)                                                                                                                                                           |
| 877 | orsds_6_pre   | Drowsiness/difficulty staying awake                   | calc<br>Calculation: if([prebup_sedation(2)] = 1, 1, 0)                                                                                                                                                         |
| 878 | orsds_7_pre   | Feeling lightheaded or dizzy                          | calc<br>Calculation: if([prebup_intox(12)] = 1, 1, 0)                                                                                                                                                           |
| 879 | orsds_8_pre   | Feeling confused                                      | calc<br>Calculation: if([prebup_intox(13)] = 1, 1, 0)                                                                                                                                                           |
| 880 | orsds_9_pre   | Feelings of general fatigue or weakness               | calc<br>Calculation: if([prebup_sedation(3)] = 1, 1, 0)                                                                                                                                                         |
| 881 | orsds_10_pre  | Itchiness                                             | calc<br>Calculation: if([prebup_misc_sx(2)] = 1, 1, 0)                                                                                                                                                          |
| 882 | orsds_11_pre  | Dry mouth                                             | calc<br>Calculation: if([prebup_misc_sx(3)] = 1, 1, 0)                                                                                                                                                          |
| 883 | orsds_12_pre  | Headache                                              | calc<br>Calculation: if([prebup_misc_sx(4)] = 1, 1, 0)                                                                                                                                                          |
| 884 | sum_orsds_pre | Sum OR-SDS                                            | calc<br>Calculation: sum([orsds_1_pre], [orsds_2_pre], [orsds_3_pre], [orsds_4_pre], [orsds_5_pre], [orsds_6_pre], [orsds_7_pre], [orsds_8_pre], [orsds_9_pre], [orsds_10_pre], [orsds_11_pre], [orsds_12_pre]) |
| 885 | cows_1_pre    | Section Header: COWS<br>Pulse > 80                    | calc<br>Calculation: if([prebup_withdrawal(3)] = 1, 1, 0)                                                                                                                                                       |
| 886 | cows_2_pre    | Sweating                                              | calc<br>Calculation: if([prebup_withdrawal(4)] = 1, 1, 0)                                                                                                                                                       |
| 887 | cows_3_pre    | Restlessness                                          | calc<br>Calculation: if([prebup_anxious(4)] = 1, 1, 0)                                                                                                                                                          |
| 888 | cows_4_pre    | Pupil size larger than normal                         | calc<br>Calculation: if([prebup_withdrawal(5)] = 1, 1, 0)                                                                                                                                                       |
| 889 | cows_5_pre    | Bone, joint, or body aches                            | calc<br>Calculation: if([prebup_withdrawal(6)] = 1, 1, 0)                                                                                                                                                       |
| 890 | cows_6_pre    | GI Upset - stomach cramps, nausea, vomiting, diarrhea | calc<br>Calculation: (if([prebup_gi(2)] = 1, 1, 0)) or (if([prebup_gi(3)] = 1, 1, 0)) or (if([prebup_gi(4)] = 1, 1, 0)) or (if([prebup_gi(5)] = 1, 1, 0))                                                       |
| 891 | cows_7_pre    | Tremor                                                | calc<br>Calculation: if([prebup_anxious(3)] = 1, 1, 0)                                                                                                                                                          |
| 892 | cows_8_pre    | Yawning                                               | calc<br>Calculation: if([prebup_withdrawal(1)] = 1, 1, 0)                                                                                                                                                       |

|                                                                   |                               |                                                          |                                                                                                                                                                       |   |            |   |            |   |          |
|-------------------------------------------------------------------|-------------------------------|----------------------------------------------------------|-----------------------------------------------------------------------------------------------------------------------------------------------------------------------|---|------------|---|------------|---|----------|
| 893                                                               | cows_9_pre                    | Anxiety, irritability, or agitation                      | calc<br>Calculation: if([prebup_anxious(1)] = 1, 1, 0)                                                                                                                |   |            |   |            |   |          |
| 894                                                               | cows_10_pre                   | Gooseflesh skin                                          | calc<br>Calculation: if([prebup_withdrawal(2)] = 1, 1, 0)                                                                                                             |   |            |   |            |   |          |
| 895                                                               | sum_cows_pre                  | Sum COWS                                                 | calc<br>Calculation: sum([cows_1_pre], [cows_2_pre], [cows_3_pre], [cows_4_pre], [cows_5_pre], [cows_6_pre], [cows_7_pre], [cows_8_pre], [cows_9_pre], [cows_10_pre]) |   |            |   |            |   |          |
| 896                                                               | prebup_chart_scoring_complete | Section Header: <i>Form Status</i><br>Complete?          | dropdown<br><table border="1"> <tr> <td>0</td> <td>Incomplete</td> </tr> <tr> <td>1</td> <td>Unverified</td> </tr> <tr> <td>2</td> <td>Complete</td> </tr> </table>   | 0 | Incomplete | 1 | Unverified | 2 | Complete |
| 0                                                                 | Incomplete                    |                                                          |                                                                                                                                                                       |   |            |   |            |   |          |
| 1                                                                 | Unverified                    |                                                          |                                                                                                                                                                       |   |            |   |            |   |          |
| 2                                                                 | Complete                      |                                                          |                                                                                                                                                                       |   |            |   |            |   |          |
| <b>Instrument: Post-Bup Chart Scoring (postbup_chart_scoring)</b> |                               |                                                          |                                                                                                                                                                       |   |            |   |            |   |          |
| 897                                                               | agonist_1_post                | Section Header: <i>Opiate 32 (16 Agonist)</i><br>Nodding | calc<br>Calculation: if([postbup_sedation(1)] = 1, 1, 0)                                                                                                              |   |            |   |            |   |          |
| 898                                                               | agonist_2_post                | Sleepy                                                   | calc<br>Calculation: if([postbup_sedation(2)] = 1, 1, 0)                                                                                                              |   |            |   |            |   |          |
| 899                                                               | agonist_3_post                | Good mood                                                | calc<br>Calculation: if([postbup_intox(1)] = 1, 1, 0)                                                                                                                 |   |            |   |            |   |          |
| 900                                                               | agonist_4_post                | Coasting                                                 | calc<br>Calculation: if([postbup_intox(2)] = 1, 1, 0)                                                                                                                 |   |            |   |            |   |          |
| 901                                                               | agonist_5_post                | Pleasant Sick                                            | calc<br>Calculation: if([postbup_intox(3)] = 1, 1, 0)                                                                                                                 |   |            |   |            |   |          |
| 902                                                               | agonist_6_post                | Drive                                                    | calc<br>Calculation: if([postbup_intox(4)] = 1, 1, 0)                                                                                                                 |   |            |   |            |   |          |
| 903                                                               | agonist_7_post                | High                                                     | calc<br>Calculation: if([postbup_intox(5)] = 1, 1, 0)                                                                                                                 |   |            |   |            |   |          |
| 904                                                               | agonist_8_post                | Drunken                                                  | calc<br>Calculation: if([postbup_intox(6)] = 1, 1, 0)                                                                                                                 |   |            |   |            |   |          |
| 905                                                               | agonist_9_post                | Soapbox                                                  | calc<br>Calculation: if([postbup_intox(7)] = 1, 1, 0)                                                                                                                 |   |            |   |            |   |          |
| 906                                                               | agonist_10_post               | Rush                                                     | calc<br>Calculation: if([postbup_intox(8)] = 1, 1, 0)                                                                                                                 |   |            |   |            |   |          |
| 907                                                               | agonist_11_post               | Friendly                                                 | calc<br>Calculation: if([postbup_intox(9)] = 1, 1, 0)                                                                                                                 |   |            |   |            |   |          |
| 908                                                               | agonist_12_post               | Relaxed                                                  | calc<br>Calculation: if([postbup_intox(10)] = 1, 1, 0)                                                                                                                |   |            |   |            |   |          |
| 909                                                               | agonist_13_post               | Turning of stomach                                       | calc<br>Calculation: if([postbup_gi(2)] = 1, 1, 0)                                                                                                                    |   |            |   |            |   |          |
| 910                                                               | agonist_14_post               | Nervousness                                              | calc<br>Calculation: if([postbup_anxious(2)] = 1, 1, 0)                                                                                                               |   |            |   |            |   |          |
| 911                                                               | agonist_15_post               | Itchy                                                    | calc<br>Calculation: if([postbup_misc_sx(2)] = 1, 1, 0)                                                                                                               |   |            |   |            |   |          |



|     |                     |                                                            |                                                                                                                                                                                                                                                                                                                                 |
|-----|---------------------|------------------------------------------------------------|---------------------------------------------------------------------------------------------------------------------------------------------------------------------------------------------------------------------------------------------------------------------------------------------------------------------------------|
| 912 | agonist_16_post     | Dry mouth                                                  | calc<br>Calculation: if([postbup_misc_sx(3)] = 1, 1, 0)                                                                                                                                                                                                                                                                         |
| 913 | sum_agonist_post    | Sum Agonist 16                                             | calc<br>Calculation: sum([agonist_1_post], [agonist_2_post], [agonist_3_post], [agonist_4_post], [agonist_5_post], [agonist_6_post], [agonist_7_post], [agonist_8_post], [agonist_9_post], [agonist_10_post], [agonist_11_post], [agonist_12_post], [agonist_13_post], [agonist_14_post], [agonist_15_post], [agonist_16_post]) |
| 914 | antagonist_1_post   | Section Header: <i>Opiate 32 (Antagonist 9)</i><br>Yawning | calc<br>Calculation: if([postbup_withdrawal(1)] = 1, 1, 0)                                                                                                                                                                                                                                                                      |
| 915 | antagonist_2_post   | Restlessness                                               | calc<br>Calculation: if([postbup_anxious(4)] = 1, 1, 0)                                                                                                                                                                                                                                                                         |
| 916 | antagonist_3_post   | Tearing or Runny Nose                                      | calc<br>Calculation: if([postbup_withdrawal(7)] = 1, 1, 0)                                                                                                                                                                                                                                                                      |
| 917 | antagonist_4_post   | Turning of stomach/cramping/abdominal pain                 | calc<br>Calculation: if([postbup_gi(2)] = 1, 1, 0)                                                                                                                                                                                                                                                                              |
| 918 | antagonist_5_post   | Anxiety, irritability, or agitation                        | calc<br>Calculation: if([postbup_anxious(1)] = 1, 1, 0)                                                                                                                                                                                                                                                                         |
| 919 | antagonist_6_post   | Chills or gooseflesh skin                                  | calc<br>Calculation: if([postbup_withdrawal(2)] = 1, 1, 0)                                                                                                                                                                                                                                                                      |
| 920 | antagonist_7_post   | Sweating                                                   | calc<br>Calculation: if([postbup_withdrawal(4)] = 1, 1, 0)                                                                                                                                                                                                                                                                      |
| 921 | antagonist_8_post   | Bone, joint, or body aches                                 | calc<br>Calculation: if([postbup_withdrawal(6)] = 1, 1, 0)                                                                                                                                                                                                                                                                      |
| 922 | antagonist_9_post   | Feelings of general fatigue or weakness                    | calc<br>Calculation: if([postbup_sedation(3)] = 1, 1, 0)                                                                                                                                                                                                                                                                        |
| 923 | sum_antagonist_post | Sum antagonist 9                                           | calc<br>Calculation: sum([antagonist_1_post], [antagonist_2_post], [antagonist_3_post], [antagonist_4_post], [antagonist_5_post], [antagonist_6_post], [antagonist_7_post], [antagonist_8_post], [antagonist_9_post])                                                                                                           |
| 924 | orsds_1_post        | Section Header: <i>OR-SDS</i><br>Nausea                    | calc<br>Calculation: if([postbup_gi(3)] = 1, 1, 0)                                                                                                                                                                                                                                                                              |
| 925 | orsds_2_post        | Vomiting                                                   | calc<br>Calculation: if([postbup_gi(4)] = 1, 1, 0)                                                                                                                                                                                                                                                                              |
| 926 | orsds_3_post        | Constipation                                               | calc<br>Calculation: if([postbup_gi(1)] = 1, 1, 0)                                                                                                                                                                                                                                                                              |
| 927 | orsds_4_post        | Difficulty passing urine                                   | calc<br>Calculation: if([postbup_misc_sx(1)] = 1, 1, 0)                                                                                                                                                                                                                                                                         |
| 928 | orsds_5_post        | Difficulty concentrating                                   | calc<br>Calculation: if([postbup_intox(11)] = 1, 1, 0)                                                                                                                                                                                                                                                                          |

|     |                |                                                      |                                                                                                                                                                                                                             |
|-----|----------------|------------------------------------------------------|-----------------------------------------------------------------------------------------------------------------------------------------------------------------------------------------------------------------------------|
| 929 | orsds_6_post   | Drowsiness/diffculty staying awake                   | calc<br>Calculation: if([postbup_sedation(2)] = 1, 1, 0)                                                                                                                                                                    |
| 930 | orsds_7_post   | Feeling lightheaded or dizzy                         | calc<br>Calculation: if([postbup_intox(12)] = 1, 1, 0)                                                                                                                                                                      |
| 931 | orsds_8_post   | Feeling confused                                     | calc<br>Calculation: if([postbup_intox(13)] = 1, 1, 0)                                                                                                                                                                      |
| 932 | orsds_9_post   | Feelings of general fatigue or weakness              | calc<br>Calculation: if([postbup_sedation(3)] = 1, 1, 0)                                                                                                                                                                    |
| 933 | orsds_10_post  | Itchiness                                            | calc<br>Calculation: if([postbup_misc_sx(2)] = 1, 1, 0)                                                                                                                                                                     |
| 934 | orsds_11_post  | Dry mouth                                            | calc<br>Calculation: if([postbup_misc_sx(3)] = 1, 1, 0)                                                                                                                                                                     |
| 935 | orsds_12_post  | Headache                                             | calc<br>Calculation: if([postbup_misc_sx(4)] = 1, 1, 0)                                                                                                                                                                     |
| 936 | sum_orsds_post | Sum OR-SDS                                           | calc<br>Calculation: sum([orsds_1_post], [orsds_2_post], [orsds_3_post], [orsds_4_post], [orsds_5_post], [orsds_6_post], [orsds_7_post], [orsds_8_post], [orsds_9_post], [orsds_10_post], [orsds_11_post], [orsds_12_post]) |
| 937 | cows_1_post    | Section Header: COWS<br>Pulse > 80                   | calc<br>Calculation: if([postbup_withdrawal(3)] = 1, 1, 0)                                                                                                                                                                  |
| 938 | cows_2_post    | Sweating                                             | calc<br>Calculation: if([postbup_withdrawal(4)] = 1, 1, 0)                                                                                                                                                                  |
| 939 | cows_3_post    | Restlessness                                         | calc<br>Calculation: if([postbup_anxious(4)] = 1, 1, 0)                                                                                                                                                                     |
| 940 | cows_4_post    | Pupil size larger than normal                        | calc<br>Calculation: if([postbup_withdrawal(5)] = 1, 1, 0)                                                                                                                                                                  |
| 941 | cows_5_post    | Bone, joint, or body aches                           | calc<br>Calculation: if([postbup_withdrawal(6)] = 1, 1, 0)                                                                                                                                                                  |
| 942 | cows_6_post    | GI Upset -stomach cramps, nausea, vomiting, diarrhea | calc<br>Calculation: if([postbup_gi(2)] = 1, 1, 0) or if([postbup_gi(3)] = 1, 1, 0) or if([postbup_gi(4)] = 1, 1, 0) or if([postbup_gi(5)] = 1, 1, 0)                                                                       |
| 943 | cows_7_post    | Tremor                                               | calc<br>Calculation: if([postbup_anxious(3)] = 1, 1, 0)                                                                                                                                                                     |
| 944 | cows_8_post    | Yawning                                              | calc<br>Calculation: if([postbup_withdrawal(1)] = 1, 1, 0)                                                                                                                                                                  |
| 945 | cows_9_post    | Anxiety, irritability, or agitation                  | calc<br>Calculation: if([postbup_anxious(1)] = 1, 1, 0)                                                                                                                                                                     |

|                                                    |            |                                                                                                                                                                                                     |                                                                                  |                                                                                                                                                                                                                                                                                                              |   |            |   |            |   |          |   |   |   |   |   |   |   |   |   |   |
|----------------------------------------------------|------------|-----------------------------------------------------------------------------------------------------------------------------------------------------------------------------------------------------|----------------------------------------------------------------------------------|--------------------------------------------------------------------------------------------------------------------------------------------------------------------------------------------------------------------------------------------------------------------------------------------------------------|---|------------|---|------------|---|----------|---|---|---|---|---|---|---|---|---|---|
|                                                    | 946        | cows_10_post                                                                                                                                                                                        | Gooseflesh skin                                                                  | calc<br>Calculation: if([postbup_withdrawal(2)] = 1, 1, 0)                                                                                                                                                                                                                                                   |   |            |   |            |   |          |   |   |   |   |   |   |   |   |   |   |
|                                                    | 947        | sum_cows_post                                                                                                                                                                                       | Sum COWS                                                                         | calc<br>Calculation: sum([cows_1_post], [cows_2_post], [cows_3_post], [cows_4_post], [cows_5_post], [cows_6_post], [cows_7_post], [cows_8_post], [cows_9_post], [cows_10_post])                                                                                                                              |   |            |   |            |   |          |   |   |   |   |   |   |   |   |   |   |
|                                                    | 948        | admit_post                                                                                                                                                                                          | Section Header: <i>Serious Adverse Events</i><br>Hospitalization                 | calc<br>Calculation: if([disp] = 2, 1, 0)                                                                                                                                                                                                                                                                    |   |            |   |            |   |          |   |   |   |   |   |   |   |   |   |   |
|                                                    | 949        | threat_post                                                                                                                                                                                         | CTCAE Grade 4 (Life-threatening consequences; urgent intervention indicated)     | calc<br>Calculation: if([cse_spec(2)] = 1, 1, 0)                                                                                                                                                                                                                                                             |   |            |   |            |   |          |   |   |   |   |   |   |   |   |   |   |
|                                                    | 950        | death_post                                                                                                                                                                                          | CTCAE Grade 5 (Death from AE)                                                    | calc<br>Calculation: if([ed_death] = 1, 1, 0)                                                                                                                                                                                                                                                                |   |            |   |            |   |          |   |   |   |   |   |   |   |   |   |   |
|                                                    | 951        | sum_sae_post                                                                                                                                                                                        | Sum SAE                                                                          | calc<br>Calculation: sum([admit_post], [threat_post], [death_post])                                                                                                                                                                                                                                          |   |            |   |            |   |          |   |   |   |   |   |   |   |   |   |   |
|                                                    | 952        | postbup_chart_scoring_complete                                                                                                                                                                      | Section Header: <i>Form Status</i><br>Complete?                                  | dropdown<br><table border="1"> <tr> <td>0</td> <td>Incomplete</td> </tr> <tr> <td>1</td> <td>Unverified</td> </tr> <tr> <td>2</td> <td>Complete</td> </tr> </table>                                                                                                                                          | 0 | Incomplete | 1 | Unverified | 2 | Complete |   |   |   |   |   |   |   |   |   |   |
| 0                                                  | Incomplete |                                                                                                                                                                                                     |                                                                                  |                                                                                                                                                                                                                                                                                                              |   |            |   |            |   |          |   |   |   |   |   |   |   |   |   |   |
| 1                                                  | Unverified |                                                                                                                                                                                                     |                                                                                  |                                                                                                                                                                                                                                                                                                              |   |            |   |            |   |          |   |   |   |   |   |   |   |   |   |   |
| 2                                                  | Complete   |                                                                                                                                                                                                     |                                                                                  |                                                                                                                                                                                                                                                                                                              |   |            |   |            |   |          |   |   |   |   |   |   |   |   |   |   |
| <b>Instrument: Return Visit(s) (return_visits)</b> |            |                                                                                                                                                                                                     |                                                                                  |                                                                                                                                                                                                                                                                                                              |   |            |   |            |   |          |   |   |   |   |   |   |   |   |   |   |
|                                                    | 953        | return_yn                                                                                                                                                                                           | Did the patient return to the emergency department within 10 days of this visit? | yesno<br><table border="1"> <tr> <td>1</td> <td>Yes</td> </tr> <tr> <td>0</td> <td>No</td> </tr> </table>                                                                                                                                                                                                    | 1 | Yes        | 0 | No         |   |          |   |   |   |   |   |   |   |   |   |   |
| 1                                                  | Yes        |                                                                                                                                                                                                     |                                                                                  |                                                                                                                                                                                                                                                                                                              |   |            |   |            |   |          |   |   |   |   |   |   |   |   |   |   |
| 0                                                  | No         |                                                                                                                                                                                                     |                                                                                  |                                                                                                                                                                                                                                                                                                              |   |            |   |            |   |          |   |   |   |   |   |   |   |   |   |   |
|                                                    | 954        | return_num<br>Show the field ONLY if: [return_yn] = '1'                                                                                                                                             | How many times did the patient return within 10 days of this visit?              | radio<br><table border="1"> <tr> <td>0</td> <td>0</td> </tr> <tr> <td>1</td> <td>1</td> </tr> <tr> <td>2</td> <td>2</td> </tr> <tr> <td>3</td> <td>3</td> </tr> <tr> <td>4</td> <td>4</td> </tr> <tr> <td>5</td> <td>5</td> </tr> <tr> <td>6</td> <td>6</td> </tr> <tr> <td>7</td> <td>7</td> </tr> </table> | 0 | 0          | 1 | 1          | 2 | 2        | 3 | 3 | 4 | 4 | 5 | 5 | 6 | 6 | 7 | 7 |
| 0                                                  | 0          |                                                                                                                                                                                                     |                                                                                  |                                                                                                                                                                                                                                                                                                              |   |            |   |            |   |          |   |   |   |   |   |   |   |   |   |   |
| 1                                                  | 1          |                                                                                                                                                                                                     |                                                                                  |                                                                                                                                                                                                                                                                                                              |   |            |   |            |   |          |   |   |   |   |   |   |   |   |   |   |
| 2                                                  | 2          |                                                                                                                                                                                                     |                                                                                  |                                                                                                                                                                                                                                                                                                              |   |            |   |            |   |          |   |   |   |   |   |   |   |   |   |   |
| 3                                                  | 3          |                                                                                                                                                                                                     |                                                                                  |                                                                                                                                                                                                                                                                                                              |   |            |   |            |   |          |   |   |   |   |   |   |   |   |   |   |
| 4                                                  | 4          |                                                                                                                                                                                                     |                                                                                  |                                                                                                                                                                                                                                                                                                              |   |            |   |            |   |          |   |   |   |   |   |   |   |   |   |   |
| 5                                                  | 5          |                                                                                                                                                                                                     |                                                                                  |                                                                                                                                                                                                                                                                                                              |   |            |   |            |   |          |   |   |   |   |   |   |   |   |   |   |
| 6                                                  | 6          |                                                                                                                                                                                                     |                                                                                  |                                                                                                                                                                                                                                                                                                              |   |            |   |            |   |          |   |   |   |   |   |   |   |   |   |   |
| 7                                                  | 7          |                                                                                                                                                                                                     |                                                                                  |                                                                                                                                                                                                                                                                                                              |   |            |   |            |   |          |   |   |   |   |   |   |   |   |   |   |
|                                                    | 955        | datetime_return_1<br>Show the field ONLY if: [return_num] = '1' or [return_num] = '2' or [return_num] = '3' or [return_num] = '4' or [return_num] = '5' or [return_num] = '6' or [return_num] = '7' | Section Header: <i>First Return Visit</i><br>Date and time of arrival            | text (datetime_mdy)                                                                                                                                                                                                                                                                                          |   |            |   |            |   |          |   |   |   |   |   |   |   |   |   |   |

|     |                                                                                                                                                                                                                               |                                                                                                               |                                                                                                                                                                                                                                                                                                                                                                                                                                                                                                                                                                                                                                                                                                                                                                                                                                                                                                                                                                                                    |   |                      |                                   |    |                      |            |   |                      |         |   |                      |          |   |                      |                                   |   |                      |     |   |                      |            |   |                      |         |   |                      |         |    |                       |                 |    |                       |                         |     |                        |             |
|-----|-------------------------------------------------------------------------------------------------------------------------------------------------------------------------------------------------------------------------------|---------------------------------------------------------------------------------------------------------------|----------------------------------------------------------------------------------------------------------------------------------------------------------------------------------------------------------------------------------------------------------------------------------------------------------------------------------------------------------------------------------------------------------------------------------------------------------------------------------------------------------------------------------------------------------------------------------------------------------------------------------------------------------------------------------------------------------------------------------------------------------------------------------------------------------------------------------------------------------------------------------------------------------------------------------------------------------------------------------------------------|---|----------------------|-----------------------------------|----|----------------------|------------|---|----------------------|---------|---|----------------------|----------|---|----------------------|-----------------------------------|---|----------------------|-----|---|----------------------|------------|---|----------------------|---------|---|----------------------|---------|----|-----------------------|-----------------|----|-----------------------|-------------------------|-----|------------------------|-------------|
| 956 | <p><b>return_redcap_1</b></p> <p>Show the field ONLY if:<br/>[return_num] = '1' or [return_num] = '2' or [return_num] = '3' or [return_num] = '4' or [return_num] = '5' or [return_num] = '6' or [return_num] = '7'</p>       | <p>Does this encounter coincide with an existing visit in REDCap?</p>                                         | <p>yesno</p> <table border="1"> <tr> <td>1</td> <td>Yes</td> </tr> <tr> <td>0</td> <td>No</td> </tr> </table>                                                                                                                                                                                                                                                                                                                                                                                                                                                                                                                                                                                                                                                                                                                                                                                                                                                                                      | 1 | Yes                  | 0                                 | No |                      |            |   |                      |         |   |                      |          |   |                      |                                   |   |                      |     |   |                      |            |   |                      |         |   |                      |         |    |                       |                 |    |                       |                         |     |                        |             |
| 1   | Yes                                                                                                                                                                                                                           |                                                                                                               |                                                                                                                                                                                                                                                                                                                                                                                                                                                                                                                                                                                                                                                                                                                                                                                                                                                                                                                                                                                                    |   |                      |                                   |    |                      |            |   |                      |         |   |                      |          |   |                      |                                   |   |                      |     |   |                      |            |   |                      |         |   |                      |         |    |                       |                 |    |                       |                         |     |                        |             |
| 0   | No                                                                                                                                                                                                                            |                                                                                                               |                                                                                                                                                                                                                                                                                                                                                                                                                                                                                                                                                                                                                                                                                                                                                                                                                                                                                                                                                                                                    |   |                      |                                   |    |                      |            |   |                      |         |   |                      |          |   |                      |                                   |   |                      |     |   |                      |            |   |                      |         |   |                      |         |    |                       |                 |    |                       |                         |     |                        |             |
| 957 | <p><b>return_redcap_spec_1</b></p> <p>Show the field ONLY if:<br/>[return_redcap_1] = '1'</p>                                                                                                                                 | <p>Please enter the visit number</p>                                                                          | <p>text</p>                                                                                                                                                                                                                                                                                                                                                                                                                                                                                                                                                                                                                                                                                                                                                                                                                                                                                                                                                                                        |   |                      |                                   |    |                      |            |   |                      |         |   |                      |          |   |                      |                                   |   |                      |     |   |                      |            |   |                      |         |   |                      |         |    |                       |                 |    |                       |                         |     |                        |             |
| 958 | <p><b>return_od_1</b></p> <p>Show the field ONLY if:<br/>[return_num] = '1' or [return_num] = '2' or [return_num] = '3' or [return_num] = '4' or [return_num] = '5' or [return_num] = '6' or [return_num] = '7'</p>           | <p>Did the patient present to the ED for opioid overdose?</p>                                                 | <p>yesno</p> <table border="1"> <tr> <td>1</td> <td>Yes</td> </tr> <tr> <td>0</td> <td>No</td> </tr> </table>                                                                                                                                                                                                                                                                                                                                                                                                                                                                                                                                                                                                                                                                                                                                                                                                                                                                                      | 1 | Yes                  | 0                                 | No |                      |            |   |                      |         |   |                      |          |   |                      |                                   |   |                      |     |   |                      |            |   |                      |         |   |                      |         |    |                       |                 |    |                       |                         |     |                        |             |
| 1   | Yes                                                                                                                                                                                                                           |                                                                                                               |                                                                                                                                                                                                                                                                                                                                                                                                                                                                                                                                                                                                                                                                                                                                                                                                                                                                                                                                                                                                    |   |                      |                                   |    |                      |            |   |                      |         |   |                      |          |   |                      |                                   |   |                      |     |   |                      |            |   |                      |         |   |                      |         |    |                       |                 |    |                       |                         |     |                        |             |
| 0   | No                                                                                                                                                                                                                            |                                                                                                               |                                                                                                                                                                                                                                                                                                                                                                                                                                                                                                                                                                                                                                                                                                                                                                                                                                                                                                                                                                                                    |   |                      |                                   |    |                      |            |   |                      |         |   |                      |          |   |                      |                                   |   |                      |     |   |                      |            |   |                      |         |   |                      |         |    |                       |                 |    |                       |                         |     |                        |             |
| 959 | <p><b>return_substance_yn_1</b></p> <p>Show the field ONLY if:<br/>[return_num] = '1' or [return_num] = '2' or [return_num] = '3' or [return_num] = '4' or [return_num] = '5' or [return_num] = '6' or [return_num] = '7'</p> | <p>Did the patient or provider report any substance use between the index ED visit and this return visit?</p> | <p>yesno</p> <table border="1"> <tr> <td>1</td> <td>Yes</td> </tr> <tr> <td>0</td> <td>No</td> </tr> </table>                                                                                                                                                                                                                                                                                                                                                                                                                                                                                                                                                                                                                                                                                                                                                                                                                                                                                      | 1 | Yes                  | 0                                 | No |                      |            |   |                      |         |   |                      |          |   |                      |                                   |   |                      |     |   |                      |            |   |                      |         |   |                      |         |    |                       |                 |    |                       |                         |     |                        |             |
| 1   | Yes                                                                                                                                                                                                                           |                                                                                                               |                                                                                                                                                                                                                                                                                                                                                                                                                                                                                                                                                                                                                                                                                                                                                                                                                                                                                                                                                                                                    |   |                      |                                   |    |                      |            |   |                      |         |   |                      |          |   |                      |                                   |   |                      |     |   |                      |            |   |                      |         |   |                      |         |    |                       |                 |    |                       |                         |     |                        |             |
| 0   | No                                                                                                                                                                                                                            |                                                                                                               |                                                                                                                                                                                                                                                                                                                                                                                                                                                                                                                                                                                                                                                                                                                                                                                                                                                                                                                                                                                                    |   |                      |                                   |    |                      |            |   |                      |         |   |                      |          |   |                      |                                   |   |                      |     |   |                      |            |   |                      |         |   |                      |         |    |                       |                 |    |                       |                         |     |                        |             |
| 960 | <p><b>return_substance_1</b></p> <p>Show the field ONLY if:<br/>[return_substance_yn_1] = '1'</p>                                                                                                                             | <p>Which substance(s) did the patient use?</p>                                                                | <p>checkbox</p> <table border="1"> <tr> <td>1</td> <td>return_substance_1_1</td> <td>Opioids (not including buprenorph</td> </tr> <tr> <td>2</td> <td>return_substance_1_2</td> <td>Methamphie</td> </tr> <tr> <td>3</td> <td>return_substance_1_3</td> <td>Cocaine</td> </tr> <tr> <td>4</td> <td>return_substance_1_4</td> <td>Cannabis</td> </tr> <tr> <td>5</td> <td>return_substance_1_5</td> <td>Hallucinoge (including Ecstasy/MD</td> </tr> <tr> <td>6</td> <td>return_substance_1_6</td> <td>LSD</td> </tr> <tr> <td>7</td> <td>return_substance_1_7</td> <td>Benzodiaze</td> </tr> <tr> <td>8</td> <td>return_substance_1_8</td> <td>Alcohol</td> </tr> <tr> <td>9</td> <td>return_substance_1_9</td> <td>Tobacco</td> </tr> <tr> <td>10</td> <td>return_substance_1_10</td> <td>Other stimu NOS</td> </tr> <tr> <td>11</td> <td>return_substance_1_11</td> <td>Other (note heavy usage</td> </tr> <tr> <td>999</td> <td>return_substance_1_999</td> <td>None of the</td> </tr> </table> | 1 | return_substance_1_1 | Opioids (not including buprenorph | 2  | return_substance_1_2 | Methamphie | 3 | return_substance_1_3 | Cocaine | 4 | return_substance_1_4 | Cannabis | 5 | return_substance_1_5 | Hallucinoge (including Ecstasy/MD | 6 | return_substance_1_6 | LSD | 7 | return_substance_1_7 | Benzodiaze | 8 | return_substance_1_8 | Alcohol | 9 | return_substance_1_9 | Tobacco | 10 | return_substance_1_10 | Other stimu NOS | 11 | return_substance_1_11 | Other (note heavy usage | 999 | return_substance_1_999 | None of the |
| 1   | return_substance_1_1                                                                                                                                                                                                          | Opioids (not including buprenorph                                                                             |                                                                                                                                                                                                                                                                                                                                                                                                                                                                                                                                                                                                                                                                                                                                                                                                                                                                                                                                                                                                    |   |                      |                                   |    |                      |            |   |                      |         |   |                      |          |   |                      |                                   |   |                      |     |   |                      |            |   |                      |         |   |                      |         |    |                       |                 |    |                       |                         |     |                        |             |
| 2   | return_substance_1_2                                                                                                                                                                                                          | Methamphie                                                                                                    |                                                                                                                                                                                                                                                                                                                                                                                                                                                                                                                                                                                                                                                                                                                                                                                                                                                                                                                                                                                                    |   |                      |                                   |    |                      |            |   |                      |         |   |                      |          |   |                      |                                   |   |                      |     |   |                      |            |   |                      |         |   |                      |         |    |                       |                 |    |                       |                         |     |                        |             |
| 3   | return_substance_1_3                                                                                                                                                                                                          | Cocaine                                                                                                       |                                                                                                                                                                                                                                                                                                                                                                                                                                                                                                                                                                                                                                                                                                                                                                                                                                                                                                                                                                                                    |   |                      |                                   |    |                      |            |   |                      |         |   |                      |          |   |                      |                                   |   |                      |     |   |                      |            |   |                      |         |   |                      |         |    |                       |                 |    |                       |                         |     |                        |             |
| 4   | return_substance_1_4                                                                                                                                                                                                          | Cannabis                                                                                                      |                                                                                                                                                                                                                                                                                                                                                                                                                                                                                                                                                                                                                                                                                                                                                                                                                                                                                                                                                                                                    |   |                      |                                   |    |                      |            |   |                      |         |   |                      |          |   |                      |                                   |   |                      |     |   |                      |            |   |                      |         |   |                      |         |    |                       |                 |    |                       |                         |     |                        |             |
| 5   | return_substance_1_5                                                                                                                                                                                                          | Hallucinoge (including Ecstasy/MD                                                                             |                                                                                                                                                                                                                                                                                                                                                                                                                                                                                                                                                                                                                                                                                                                                                                                                                                                                                                                                                                                                    |   |                      |                                   |    |                      |            |   |                      |         |   |                      |          |   |                      |                                   |   |                      |     |   |                      |            |   |                      |         |   |                      |         |    |                       |                 |    |                       |                         |     |                        |             |
| 6   | return_substance_1_6                                                                                                                                                                                                          | LSD                                                                                                           |                                                                                                                                                                                                                                                                                                                                                                                                                                                                                                                                                                                                                                                                                                                                                                                                                                                                                                                                                                                                    |   |                      |                                   |    |                      |            |   |                      |         |   |                      |          |   |                      |                                   |   |                      |     |   |                      |            |   |                      |         |   |                      |         |    |                       |                 |    |                       |                         |     |                        |             |
| 7   | return_substance_1_7                                                                                                                                                                                                          | Benzodiaze                                                                                                    |                                                                                                                                                                                                                                                                                                                                                                                                                                                                                                                                                                                                                                                                                                                                                                                                                                                                                                                                                                                                    |   |                      |                                   |    |                      |            |   |                      |         |   |                      |          |   |                      |                                   |   |                      |     |   |                      |            |   |                      |         |   |                      |         |    |                       |                 |    |                       |                         |     |                        |             |
| 8   | return_substance_1_8                                                                                                                                                                                                          | Alcohol                                                                                                       |                                                                                                                                                                                                                                                                                                                                                                                                                                                                                                                                                                                                                                                                                                                                                                                                                                                                                                                                                                                                    |   |                      |                                   |    |                      |            |   |                      |         |   |                      |          |   |                      |                                   |   |                      |     |   |                      |            |   |                      |         |   |                      |         |    |                       |                 |    |                       |                         |     |                        |             |
| 9   | return_substance_1_9                                                                                                                                                                                                          | Tobacco                                                                                                       |                                                                                                                                                                                                                                                                                                                                                                                                                                                                                                                                                                                                                                                                                                                                                                                                                                                                                                                                                                                                    |   |                      |                                   |    |                      |            |   |                      |         |   |                      |          |   |                      |                                   |   |                      |     |   |                      |            |   |                      |         |   |                      |         |    |                       |                 |    |                       |                         |     |                        |             |
| 10  | return_substance_1_10                                                                                                                                                                                                         | Other stimu NOS                                                                                               |                                                                                                                                                                                                                                                                                                                                                                                                                                                                                                                                                                                                                                                                                                                                                                                                                                                                                                                                                                                                    |   |                      |                                   |    |                      |            |   |                      |         |   |                      |          |   |                      |                                   |   |                      |     |   |                      |            |   |                      |         |   |                      |         |    |                       |                 |    |                       |                         |     |                        |             |
| 11  | return_substance_1_11                                                                                                                                                                                                         | Other (note heavy usage                                                                                       |                                                                                                                                                                                                                                                                                                                                                                                                                                                                                                                                                                                                                                                                                                                                                                                                                                                                                                                                                                                                    |   |                      |                                   |    |                      |            |   |                      |         |   |                      |          |   |                      |                                   |   |                      |     |   |                      |            |   |                      |         |   |                      |         |    |                       |                 |    |                       |                         |     |                        |             |
| 999 | return_substance_1_999                                                                                                                                                                                                        | None of the                                                                                                   |                                                                                                                                                                                                                                                                                                                                                                                                                                                                                                                                                                                                                                                                                                                                                                                                                                                                                                                                                                                                    |   |                      |                                   |    |                      |            |   |                      |         |   |                      |          |   |                      |                                   |   |                      |     |   |                      |            |   |                      |         |   |                      |         |    |                       |                 |    |                       |                         |     |                        |             |

|     |                                                                                                                                                                                                                |                                                                                |                                                                                                                                                                                                                                                                                                                                                                                                                                                                                                                                                                                                                                                                                                                                                                                                                                                                                                                                                                                                                                                               |   |                      |           |    |                      |                                       |   |                      |                                    |   |                      |                              |   |                      |                          |   |                      |           |   |                      |         |   |                      |              |   |                      |           |    |                       |             |    |                       |           |    |                       |           |    |                       |       |
|-----|----------------------------------------------------------------------------------------------------------------------------------------------------------------------------------------------------------------|--------------------------------------------------------------------------------|---------------------------------------------------------------------------------------------------------------------------------------------------------------------------------------------------------------------------------------------------------------------------------------------------------------------------------------------------------------------------------------------------------------------------------------------------------------------------------------------------------------------------------------------------------------------------------------------------------------------------------------------------------------------------------------------------------------------------------------------------------------------------------------------------------------------------------------------------------------------------------------------------------------------------------------------------------------------------------------------------------------------------------------------------------------|---|----------------------|-----------|----|----------------------|---------------------------------------|---|----------------------|------------------------------------|---|----------------------|------------------------------|---|----------------------|--------------------------|---|----------------------|-----------|---|----------------------|---------|---|----------------------|--------------|---|----------------------|-----------|----|-----------------------|-------------|----|-----------------------|-----------|----|-----------------------|-----------|----|-----------------------|-------|
| 961 | <p>return_substance_oth_1</p> <p>Show the field ONLY if:<br/>[return_substance_1(11)] = '1'</p>                                                                                                                | If "Other," please specify.                                                    | text                                                                                                                                                                                                                                                                                                                                                                                                                                                                                                                                                                                                                                                                                                                                                                                                                                                                                                                                                                                                                                                          |   |                      |           |    |                      |                                       |   |                      |                                    |   |                      |                              |   |                      |                          |   |                      |           |   |                      |         |   |                      |              |   |                      |           |    |                       |             |    |                       |           |    |                       |           |    |                       |       |
| 962 | <p>return_opioid_1</p> <p>Show the field ONLY if:<br/>[return_substance_1(1)] = '1'</p>                                                                                                                        | Which opioid(s) did the patient use?                                           | <p>checkbox</p> <table border="1"> <tr> <td>1</td> <td>return_opioid_1_1</td> <td>Heroin</td> </tr> <tr> <td>2</td> <td>return_opioid_1_2</td> <td>Oxycodone (OxyContin, Percocet, etc.)</td> </tr> <tr> <td>3</td> <td>return_opioid_1_3</td> <td>Hydrocodone (Norco, Vicodin, etc.)</td> </tr> <tr> <td>4</td> <td>return_opioid_1_4</td> <td>Fentanyl (Duragesic, Ionsys)</td> </tr> <tr> <td>5</td> <td>return_opioid_1_5</td> <td>Hydromorphone (Dilaudid)</td> </tr> <tr> <td>6</td> <td>return_opioid_1_6</td> <td>Morphine</td> </tr> <tr> <td>7</td> <td>return_opioid_1_7</td> <td>Other</td> </tr> </table>                                                                                                                                                                                                                                                                                                                                                                                                                                        | 1 | return_opioid_1_1    | Heroin    | 2  | return_opioid_1_2    | Oxycodone (OxyContin, Percocet, etc.) | 3 | return_opioid_1_3    | Hydrocodone (Norco, Vicodin, etc.) | 4 | return_opioid_1_4    | Fentanyl (Duragesic, Ionsys) | 5 | return_opioid_1_5    | Hydromorphone (Dilaudid) | 6 | return_opioid_1_6    | Morphine  | 7 | return_opioid_1_7    | Other   |   |                      |              |   |                      |           |    |                       |             |    |                       |           |    |                       |           |    |                       |       |
| 1   | return_opioid_1_1                                                                                                                                                                                              | Heroin                                                                         |                                                                                                                                                                                                                                                                                                                                                                                                                                                                                                                                                                                                                                                                                                                                                                                                                                                                                                                                                                                                                                                               |   |                      |           |    |                      |                                       |   |                      |                                    |   |                      |                              |   |                      |                          |   |                      |           |   |                      |         |   |                      |              |   |                      |           |    |                       |             |    |                       |           |    |                       |           |    |                       |       |
| 2   | return_opioid_1_2                                                                                                                                                                                              | Oxycodone (OxyContin, Percocet, etc.)                                          |                                                                                                                                                                                                                                                                                                                                                                                                                                                                                                                                                                                                                                                                                                                                                                                                                                                                                                                                                                                                                                                               |   |                      |           |    |                      |                                       |   |                      |                                    |   |                      |                              |   |                      |                          |   |                      |           |   |                      |         |   |                      |              |   |                      |           |    |                       |             |    |                       |           |    |                       |           |    |                       |       |
| 3   | return_opioid_1_3                                                                                                                                                                                              | Hydrocodone (Norco, Vicodin, etc.)                                             |                                                                                                                                                                                                                                                                                                                                                                                                                                                                                                                                                                                                                                                                                                                                                                                                                                                                                                                                                                                                                                                               |   |                      |           |    |                      |                                       |   |                      |                                    |   |                      |                              |   |                      |                          |   |                      |           |   |                      |         |   |                      |              |   |                      |           |    |                       |             |    |                       |           |    |                       |           |    |                       |       |
| 4   | return_opioid_1_4                                                                                                                                                                                              | Fentanyl (Duragesic, Ionsys)                                                   |                                                                                                                                                                                                                                                                                                                                                                                                                                                                                                                                                                                                                                                                                                                                                                                                                                                                                                                                                                                                                                                               |   |                      |           |    |                      |                                       |   |                      |                                    |   |                      |                              |   |                      |                          |   |                      |           |   |                      |         |   |                      |              |   |                      |           |    |                       |             |    |                       |           |    |                       |           |    |                       |       |
| 5   | return_opioid_1_5                                                                                                                                                                                              | Hydromorphone (Dilaudid)                                                       |                                                                                                                                                                                                                                                                                                                                                                                                                                                                                                                                                                                                                                                                                                                                                                                                                                                                                                                                                                                                                                                               |   |                      |           |    |                      |                                       |   |                      |                                    |   |                      |                              |   |                      |                          |   |                      |           |   |                      |         |   |                      |              |   |                      |           |    |                       |             |    |                       |           |    |                       |           |    |                       |       |
| 6   | return_opioid_1_6                                                                                                                                                                                              | Morphine                                                                       |                                                                                                                                                                                                                                                                                                                                                                                                                                                                                                                                                                                                                                                                                                                                                                                                                                                                                                                                                                                                                                                               |   |                      |           |    |                      |                                       |   |                      |                                    |   |                      |                              |   |                      |                          |   |                      |           |   |                      |         |   |                      |              |   |                      |           |    |                       |             |    |                       |           |    |                       |           |    |                       |       |
| 7   | return_opioid_1_7                                                                                                                                                                                              | Other                                                                          |                                                                                                                                                                                                                                                                                                                                                                                                                                                                                                                                                                                                                                                                                                                                                                                                                                                                                                                                                                                                                                                               |   |                      |           |    |                      |                                       |   |                      |                                    |   |                      |                              |   |                      |                          |   |                      |           |   |                      |         |   |                      |              |   |                      |           |    |                       |             |    |                       |           |    |                       |           |    |                       |       |
| 963 | <p>return_opioid_oth_1</p> <p>Show the field ONLY if:<br/>[return_opioid_1(7)] = '1'</p>                                                                                                                       | If "Other," please specify.                                                    | text                                                                                                                                                                                                                                                                                                                                                                                                                                                                                                                                                                                                                                                                                                                                                                                                                                                                                                                                                                                                                                                          |   |                      |           |    |                      |                                       |   |                      |                                    |   |                      |                              |   |                      |                          |   |                      |           |   |                      |         |   |                      |              |   |                      |           |    |                       |             |    |                       |           |    |                       |           |    |                       |       |
| 964 | <p>return_utox_1</p> <p>Show the field ONLY if:<br/>[return_num] = '1' or [return_num] = '2' or [return_num] = '3' or [return_num] = '4' or [return_num] = '5' or [return_num] = '6' or [return_num] = '7'</p> | Was a urine toxicology screen performed for this visit?                        | <p>yesno</p> <table border="1"> <tr> <td>1</td> <td>Yes</td> </tr> <tr> <td>0</td> <td>No</td> </tr> </table>                                                                                                                                                                                                                                                                                                                                                                                                                                                                                                                                                                                                                                                                                                                                                                                                                                                                                                                                                 | 1 | Yes                  | 0         | No |                      |                                       |   |                      |                                    |   |                      |                              |   |                      |                          |   |                      |           |   |                      |         |   |                      |              |   |                      |           |    |                       |             |    |                       |           |    |                       |           |    |                       |       |
| 1   | Yes                                                                                                                                                                                                            |                                                                                |                                                                                                                                                                                                                                                                                                                                                                                                                                                                                                                                                                                                                                                                                                                                                                                                                                                                                                                                                                                                                                                               |   |                      |           |    |                      |                                       |   |                      |                                    |   |                      |                              |   |                      |                          |   |                      |           |   |                      |         |   |                      |              |   |                      |           |    |                       |             |    |                       |           |    |                       |           |    |                       |       |
| 0   | No                                                                                                                                                                                                             |                                                                                |                                                                                                                                                                                                                                                                                                                                                                                                                                                                                                                                                                                                                                                                                                                                                                                                                                                                                                                                                                                                                                                               |   |                      |           |    |                      |                                       |   |                      |                                    |   |                      |                              |   |                      |                          |   |                      |           |   |                      |         |   |                      |              |   |                      |           |    |                       |             |    |                       |           |    |                       |           |    |                       |       |
| 965 | <p>return_utox_spec_1</p> <p>Show the field ONLY if:<br/>[return_utox_1] = '1'</p>                                                                                                                             | Please select all drugs shown to be positive in the urine toxicology analysis: | <p>checkbox</p> <table border="1"> <tr> <td>1</td> <td>return_utox_spec_1_1</td> <td>Amphetami</td> </tr> <tr> <td>2</td> <td>return_utox_spec_1_2</td> <td>Barbiturates</td> </tr> <tr> <td>3</td> <td>return_utox_spec_1_3</td> <td>Cocaine</td> </tr> <tr> <td>4</td> <td>return_utox_spec_1_4</td> <td>Methaqualo</td> </tr> <tr> <td>5</td> <td>return_utox_spec_1_5</td> <td>Methadone</td> </tr> <tr> <td>6</td> <td>return_utox_spec_1_6</td> <td>Methamphe</td> </tr> <tr> <td>7</td> <td>return_utox_spec_1_7</td> <td>Opiates</td> </tr> <tr> <td>8</td> <td>return_utox_spec_1_8</td> <td>Phencyclidin</td> </tr> <tr> <td>9</td> <td>return_utox_spec_1_9</td> <td>Marijuana</td> </tr> <tr> <td>10</td> <td>return_utox_spec_1_10</td> <td>Benzodiazep</td> </tr> <tr> <td>11</td> <td>return_utox_spec_1_11</td> <td>Propoxyph</td> </tr> <tr> <td>12</td> <td>return_utox_spec_1_12</td> <td>Amphetami</td> </tr> <tr> <td>13</td> <td>return_utox_spec_1_13</td> <td>Other</td> </tr> </table> <p>999 return_utox_spec_1_999 None of the</p> | 1 | return_utox_spec_1_1 | Amphetami | 2  | return_utox_spec_1_2 | Barbiturates                          | 3 | return_utox_spec_1_3 | Cocaine                            | 4 | return_utox_spec_1_4 | Methaqualo                   | 5 | return_utox_spec_1_5 | Methadone                | 6 | return_utox_spec_1_6 | Methamphe | 7 | return_utox_spec_1_7 | Opiates | 8 | return_utox_spec_1_8 | Phencyclidin | 9 | return_utox_spec_1_9 | Marijuana | 10 | return_utox_spec_1_10 | Benzodiazep | 11 | return_utox_spec_1_11 | Propoxyph | 12 | return_utox_spec_1_12 | Amphetami | 13 | return_utox_spec_1_13 | Other |
| 1   | return_utox_spec_1_1                                                                                                                                                                                           | Amphetami                                                                      |                                                                                                                                                                                                                                                                                                                                                                                                                                                                                                                                                                                                                                                                                                                                                                                                                                                                                                                                                                                                                                                               |   |                      |           |    |                      |                                       |   |                      |                                    |   |                      |                              |   |                      |                          |   |                      |           |   |                      |         |   |                      |              |   |                      |           |    |                       |             |    |                       |           |    |                       |           |    |                       |       |
| 2   | return_utox_spec_1_2                                                                                                                                                                                           | Barbiturates                                                                   |                                                                                                                                                                                                                                                                                                                                                                                                                                                                                                                                                                                                                                                                                                                                                                                                                                                                                                                                                                                                                                                               |   |                      |           |    |                      |                                       |   |                      |                                    |   |                      |                              |   |                      |                          |   |                      |           |   |                      |         |   |                      |              |   |                      |           |    |                       |             |    |                       |           |    |                       |           |    |                       |       |
| 3   | return_utox_spec_1_3                                                                                                                                                                                           | Cocaine                                                                        |                                                                                                                                                                                                                                                                                                                                                                                                                                                                                                                                                                                                                                                                                                                                                                                                                                                                                                                                                                                                                                                               |   |                      |           |    |                      |                                       |   |                      |                                    |   |                      |                              |   |                      |                          |   |                      |           |   |                      |         |   |                      |              |   |                      |           |    |                       |             |    |                       |           |    |                       |           |    |                       |       |
| 4   | return_utox_spec_1_4                                                                                                                                                                                           | Methaqualo                                                                     |                                                                                                                                                                                                                                                                                                                                                                                                                                                                                                                                                                                                                                                                                                                                                                                                                                                                                                                                                                                                                                                               |   |                      |           |    |                      |                                       |   |                      |                                    |   |                      |                              |   |                      |                          |   |                      |           |   |                      |         |   |                      |              |   |                      |           |    |                       |             |    |                       |           |    |                       |           |    |                       |       |
| 5   | return_utox_spec_1_5                                                                                                                                                                                           | Methadone                                                                      |                                                                                                                                                                                                                                                                                                                                                                                                                                                                                                                                                                                                                                                                                                                                                                                                                                                                                                                                                                                                                                                               |   |                      |           |    |                      |                                       |   |                      |                                    |   |                      |                              |   |                      |                          |   |                      |           |   |                      |         |   |                      |              |   |                      |           |    |                       |             |    |                       |           |    |                       |           |    |                       |       |
| 6   | return_utox_spec_1_6                                                                                                                                                                                           | Methamphe                                                                      |                                                                                                                                                                                                                                                                                                                                                                                                                                                                                                                                                                                                                                                                                                                                                                                                                                                                                                                                                                                                                                                               |   |                      |           |    |                      |                                       |   |                      |                                    |   |                      |                              |   |                      |                          |   |                      |           |   |                      |         |   |                      |              |   |                      |           |    |                       |             |    |                       |           |    |                       |           |    |                       |       |
| 7   | return_utox_spec_1_7                                                                                                                                                                                           | Opiates                                                                        |                                                                                                                                                                                                                                                                                                                                                                                                                                                                                                                                                                                                                                                                                                                                                                                                                                                                                                                                                                                                                                                               |   |                      |           |    |                      |                                       |   |                      |                                    |   |                      |                              |   |                      |                          |   |                      |           |   |                      |         |   |                      |              |   |                      |           |    |                       |             |    |                       |           |    |                       |           |    |                       |       |
| 8   | return_utox_spec_1_8                                                                                                                                                                                           | Phencyclidin                                                                   |                                                                                                                                                                                                                                                                                                                                                                                                                                                                                                                                                                                                                                                                                                                                                                                                                                                                                                                                                                                                                                                               |   |                      |           |    |                      |                                       |   |                      |                                    |   |                      |                              |   |                      |                          |   |                      |           |   |                      |         |   |                      |              |   |                      |           |    |                       |             |    |                       |           |    |                       |           |    |                       |       |
| 9   | return_utox_spec_1_9                                                                                                                                                                                           | Marijuana                                                                      |                                                                                                                                                                                                                                                                                                                                                                                                                                                                                                                                                                                                                                                                                                                                                                                                                                                                                                                                                                                                                                                               |   |                      |           |    |                      |                                       |   |                      |                                    |   |                      |                              |   |                      |                          |   |                      |           |   |                      |         |   |                      |              |   |                      |           |    |                       |             |    |                       |           |    |                       |           |    |                       |       |
| 10  | return_utox_spec_1_10                                                                                                                                                                                          | Benzodiazep                                                                    |                                                                                                                                                                                                                                                                                                                                                                                                                                                                                                                                                                                                                                                                                                                                                                                                                                                                                                                                                                                                                                                               |   |                      |           |    |                      |                                       |   |                      |                                    |   |                      |                              |   |                      |                          |   |                      |           |   |                      |         |   |                      |              |   |                      |           |    |                       |             |    |                       |           |    |                       |           |    |                       |       |
| 11  | return_utox_spec_1_11                                                                                                                                                                                          | Propoxyph                                                                      |                                                                                                                                                                                                                                                                                                                                                                                                                                                                                                                                                                                                                                                                                                                                                                                                                                                                                                                                                                                                                                                               |   |                      |           |    |                      |                                       |   |                      |                                    |   |                      |                              |   |                      |                          |   |                      |           |   |                      |         |   |                      |              |   |                      |           |    |                       |             |    |                       |           |    |                       |           |    |                       |       |
| 12  | return_utox_spec_1_12                                                                                                                                                                                          | Amphetami                                                                      |                                                                                                                                                                                                                                                                                                                                                                                                                                                                                                                                                                                                                                                                                                                                                                                                                                                                                                                                                                                                                                                               |   |                      |           |    |                      |                                       |   |                      |                                    |   |                      |                              |   |                      |                          |   |                      |           |   |                      |         |   |                      |              |   |                      |           |    |                       |             |    |                       |           |    |                       |           |    |                       |       |
| 13  | return_utox_spec_1_13                                                                                                                                                                                          | Other                                                                          |                                                                                                                                                                                                                                                                                                                                                                                                                                                                                                                                                                                                                                                                                                                                                                                                                                                                                                                                                                                                                                                               |   |                      |           |    |                      |                                       |   |                      |                                    |   |                      |                              |   |                      |                          |   |                      |           |   |                      |         |   |                      |              |   |                      |           |    |                       |             |    |                       |           |    |                       |           |    |                       |       |

|     |                                                                                                                                                                                                                         |                                                                                                                                                                                                                                                           |                                                                                                                                                                                                                                                                                                                                                                                                                                          |   |                     |         |    |                     |                                          |   |                     |                                         |   |                     |                   |
|-----|-------------------------------------------------------------------------------------------------------------------------------------------------------------------------------------------------------------------------|-----------------------------------------------------------------------------------------------------------------------------------------------------------------------------------------------------------------------------------------------------------|------------------------------------------------------------------------------------------------------------------------------------------------------------------------------------------------------------------------------------------------------------------------------------------------------------------------------------------------------------------------------------------------------------------------------------------|---|---------------------|---------|----|---------------------|------------------------------------------|---|---------------------|-----------------------------------------|---|---------------------|-------------------|
| 966 | <b>return_utox_oth_1</b><br><br><b>Show the field ONLY if:</b><br>[return_utox_spec_1(13)] = '1'                                                                                                                        | <b>If "Other," please specify</b>                                                                                                                                                                                                                         | <b>text</b>                                                                                                                                                                                                                                                                                                                                                                                                                              |   |                     |         |    |                     |                                          |   |                     |                                         |   |                     |                   |
| 967 | <b>return_craving_1</b><br><br><b>Show the field ONLY if:</b><br>[return_num] = '1' or [return_num] = '2' or [return_num] = '3' or [return_num] = '4' or [return_num] = '5' or [return_num] = '6' or [return_num] = '7' | <b>Did the patient or provider mention opioid cravings during the visit?</b>                                                                                                                                                                              | <b>yesno</b><br><table border="1" data-bbox="1047 279 1138 373"> <tr> <td>1</td> <td>Yes</td> </tr> <tr> <td>0</td> <td>No</td> </tr> </table>                                                                                                                                                                                                                                                                                           | 1 | Yes                 | 0       | No |                     |                                          |   |                     |                                         |   |                     |                   |
| 1   | Yes                                                                                                                                                                                                                     |                                                                                                                                                                                                                                                           |                                                                                                                                                                                                                                                                                                                                                                                                                                          |   |                     |         |    |                     |                                          |   |                     |                                         |   |                     |                   |
| 0   | No                                                                                                                                                                                                                      |                                                                                                                                                                                                                                                           |                                                                                                                                                                                                                                                                                                                                                                                                                                          |   |                     |         |    |                     |                                          |   |                     |                                         |   |                     |                   |
| 968 | <b>return_wd_1</b><br><br><b>Show the field ONLY if:</b><br>[return_num] = '1' or [return_num] = '2' or [return_num] = '3' or [return_num] = '4' or [return_num] = '5' or [return_num] = '6' or [return_num] = '7'      | <b>Did the patient complain about or exhibit any signs or symptoms of withdrawal during this visit?</b><br><br><i>If the patient received buprenorphine during this visit, only select signs/symptoms documented BEFORE buprenorphine administration.</i> | <b>yesno</b><br><table border="1" data-bbox="1047 604 1138 699"> <tr> <td>1</td> <td>Yes</td> </tr> <tr> <td>0</td> <td>No</td> </tr> </table>                                                                                                                                                                                                                                                                                           | 1 | Yes                 | 0       | No |                     |                                          |   |                     |                                         |   |                     |                   |
| 1   | Yes                                                                                                                                                                                                                     |                                                                                                                                                                                                                                                           |                                                                                                                                                                                                                                                                                                                                                                                                                                          |   |                     |         |    |                     |                                          |   |                     |                                         |   |                     |                   |
| 0   | No                                                                                                                                                                                                                      |                                                                                                                                                                                                                                                           |                                                                                                                                                                                                                                                                                                                                                                                                                                          |   |                     |         |    |                     |                                          |   |                     |                                         |   |                     |                   |
| 969 | <b>return_sedation_1</b><br><br><b>Show the field ONLY if:</b><br>[return_wd_1] = '1'                                                                                                                                   | <b>Section Header: Return Sedation 1</b><br><br><b>Which of the following signs or symptoms of sedation were documented?</b>                                                                                                                              | <b>checkbox</b><br><table border="1" data-bbox="1047 919 1523 1306"> <tr> <td>1</td> <td>return_sedation_1_1</td> <td>Nodding</td> </tr> <tr> <td>2</td> <td>return_sedation_1_2</td> <td>Sleepy, drowsy, difficulty staying awake</td> </tr> <tr> <td>3</td> <td>return_sedation_1_3</td> <td>Feelings of general fatigue or weakness</td> </tr> <tr> <td>0</td> <td>return_sedation_1_0</td> <td>None of the above</td> </tr> </table> | 1 | return_sedation_1_1 | Nodding | 2  | return_sedation_1_2 | Sleepy, drowsy, difficulty staying awake | 3 | return_sedation_1_3 | Feelings of general fatigue or weakness | 0 | return_sedation_1_0 | None of the above |
| 1   | return_sedation_1_1                                                                                                                                                                                                     | Nodding                                                                                                                                                                                                                                                   |                                                                                                                                                                                                                                                                                                                                                                                                                                          |   |                     |         |    |                     |                                          |   |                     |                                         |   |                     |                   |
| 2   | return_sedation_1_2                                                                                                                                                                                                     | Sleepy, drowsy, difficulty staying awake                                                                                                                                                                                                                  |                                                                                                                                                                                                                                                                                                                                                                                                                                          |   |                     |         |    |                     |                                          |   |                     |                                         |   |                     |                   |
| 3   | return_sedation_1_3                                                                                                                                                                                                     | Feelings of general fatigue or weakness                                                                                                                                                                                                                   |                                                                                                                                                                                                                                                                                                                                                                                                                                          |   |                     |         |    |                     |                                          |   |                     |                                         |   |                     |                   |
| 0   | return_sedation_1_0                                                                                                                                                                                                     | None of the above                                                                                                                                                                                                                                         |                                                                                                                                                                                                                                                                                                                                                                                                                                          |   |                     |         |    |                     |                                          |   |                     |                                         |   |                     |                   |

|     |                                                                                             |                                                                                                                                             |                                                                                                                                                                                                                                                                                                                                                                                                                                                                                                                                                                                                                                                                                                                                                                                                                                                                                                                                                                                                                                          |   |                    |                                     |   |                    |                                       |   |                    |               |   |                    |                |   |                    |                   |   |                  |                   |   |                  |                     |   |                  |      |   |                  |          |    |                   |         |    |                   |                         |    |                   |                              |    |                   |                  |   |                  |                   |
|-----|---------------------------------------------------------------------------------------------|---------------------------------------------------------------------------------------------------------------------------------------------|------------------------------------------------------------------------------------------------------------------------------------------------------------------------------------------------------------------------------------------------------------------------------------------------------------------------------------------------------------------------------------------------------------------------------------------------------------------------------------------------------------------------------------------------------------------------------------------------------------------------------------------------------------------------------------------------------------------------------------------------------------------------------------------------------------------------------------------------------------------------------------------------------------------------------------------------------------------------------------------------------------------------------------------|---|--------------------|-------------------------------------|---|--------------------|---------------------------------------|---|--------------------|---------------|---|--------------------|----------------|---|--------------------|-------------------|---|------------------|-------------------|---|------------------|---------------------|---|------------------|------|---|------------------|----------|----|-------------------|---------|----|-------------------|-------------------------|----|-------------------|------------------------------|----|-------------------|------------------|---|------------------|-------------------|
| 970 | <b>return_intox_1</b><br><br><b>Show the field ONLY if:</b><br><b>[return_wd_1] = '1'</b>   | <b>Section Header:</b> <i>Return Intoxication 1</i><br><br><b>Which of the following signs or symptoms of intoxication were documented?</b> | <b>checkbox</b><br><table border="1"> <tr><td>1</td><td>return_intox_1_1</td><td>Good mood</td></tr> <tr><td>2</td><td>return_intox_1_2</td><td>Coasting (Spaced out)</td></tr> <tr><td>3</td><td>return_intox_1_3</td><td>Pleasant Sick</td></tr> <tr><td>4</td><td>return_intox_1_4</td><td>Drive (energy)</td></tr> <tr><td>5</td><td>return_intox_1_5</td><td>High</td></tr> <tr><td>6</td><td>return_intox_1_6</td><td>Drunken</td></tr> <tr><td>7</td><td>return_intox_1_7</td><td>Soapbox (talkative)</td></tr> <tr><td>8</td><td>return_intox_1_8</td><td>Rush</td></tr> <tr><td>9</td><td>return_intox_1_9</td><td>Friendly</td></tr> <tr><td>10</td><td>return_intox_1_10</td><td>Relaxed</td></tr> <tr><td>11</td><td>return_intox_1_11</td><td>Diffculty concentrating</td></tr> <tr><td>12</td><td>return_intox_1_12</td><td>Feeling lightheaded or dizzy</td></tr> <tr><td>13</td><td>return_intox_1_13</td><td>Feeling confused</td></tr> <tr><td>0</td><td>return_intox_1_0</td><td>None of the above</td></tr> </table> | 1 | return_intox_1_1   | Good mood                           | 2 | return_intox_1_2   | Coasting (Spaced out)                 | 3 | return_intox_1_3   | Pleasant Sick | 4 | return_intox_1_4   | Drive (energy) | 5 | return_intox_1_5   | High              | 6 | return_intox_1_6 | Drunken           | 7 | return_intox_1_7 | Soapbox (talkative) | 8 | return_intox_1_8 | Rush | 9 | return_intox_1_9 | Friendly | 10 | return_intox_1_10 | Relaxed | 11 | return_intox_1_11 | Diffculty concentrating | 12 | return_intox_1_12 | Feeling lightheaded or dizzy | 13 | return_intox_1_13 | Feeling confused | 0 | return_intox_1_0 | None of the above |
| 1   | return_intox_1_1                                                                            | Good mood                                                                                                                                   |                                                                                                                                                                                                                                                                                                                                                                                                                                                                                                                                                                                                                                                                                                                                                                                                                                                                                                                                                                                                                                          |   |                    |                                     |   |                    |                                       |   |                    |               |   |                    |                |   |                    |                   |   |                  |                   |   |                  |                     |   |                  |      |   |                  |          |    |                   |         |    |                   |                         |    |                   |                              |    |                   |                  |   |                  |                   |
| 2   | return_intox_1_2                                                                            | Coasting (Spaced out)                                                                                                                       |                                                                                                                                                                                                                                                                                                                                                                                                                                                                                                                                                                                                                                                                                                                                                                                                                                                                                                                                                                                                                                          |   |                    |                                     |   |                    |                                       |   |                    |               |   |                    |                |   |                    |                   |   |                  |                   |   |                  |                     |   |                  |      |   |                  |          |    |                   |         |    |                   |                         |    |                   |                              |    |                   |                  |   |                  |                   |
| 3   | return_intox_1_3                                                                            | Pleasant Sick                                                                                                                               |                                                                                                                                                                                                                                                                                                                                                                                                                                                                                                                                                                                                                                                                                                                                                                                                                                                                                                                                                                                                                                          |   |                    |                                     |   |                    |                                       |   |                    |               |   |                    |                |   |                    |                   |   |                  |                   |   |                  |                     |   |                  |      |   |                  |          |    |                   |         |    |                   |                         |    |                   |                              |    |                   |                  |   |                  |                   |
| 4   | return_intox_1_4                                                                            | Drive (energy)                                                                                                                              |                                                                                                                                                                                                                                                                                                                                                                                                                                                                                                                                                                                                                                                                                                                                                                                                                                                                                                                                                                                                                                          |   |                    |                                     |   |                    |                                       |   |                    |               |   |                    |                |   |                    |                   |   |                  |                   |   |                  |                     |   |                  |      |   |                  |          |    |                   |         |    |                   |                         |    |                   |                              |    |                   |                  |   |                  |                   |
| 5   | return_intox_1_5                                                                            | High                                                                                                                                        |                                                                                                                                                                                                                                                                                                                                                                                                                                                                                                                                                                                                                                                                                                                                                                                                                                                                                                                                                                                                                                          |   |                    |                                     |   |                    |                                       |   |                    |               |   |                    |                |   |                    |                   |   |                  |                   |   |                  |                     |   |                  |      |   |                  |          |    |                   |         |    |                   |                         |    |                   |                              |    |                   |                  |   |                  |                   |
| 6   | return_intox_1_6                                                                            | Drunken                                                                                                                                     |                                                                                                                                                                                                                                                                                                                                                                                                                                                                                                                                                                                                                                                                                                                                                                                                                                                                                                                                                                                                                                          |   |                    |                                     |   |                    |                                       |   |                    |               |   |                    |                |   |                    |                   |   |                  |                   |   |                  |                     |   |                  |      |   |                  |          |    |                   |         |    |                   |                         |    |                   |                              |    |                   |                  |   |                  |                   |
| 7   | return_intox_1_7                                                                            | Soapbox (talkative)                                                                                                                         |                                                                                                                                                                                                                                                                                                                                                                                                                                                                                                                                                                                                                                                                                                                                                                                                                                                                                                                                                                                                                                          |   |                    |                                     |   |                    |                                       |   |                    |               |   |                    |                |   |                    |                   |   |                  |                   |   |                  |                     |   |                  |      |   |                  |          |    |                   |         |    |                   |                         |    |                   |                              |    |                   |                  |   |                  |                   |
| 8   | return_intox_1_8                                                                            | Rush                                                                                                                                        |                                                                                                                                                                                                                                                                                                                                                                                                                                                                                                                                                                                                                                                                                                                                                                                                                                                                                                                                                                                                                                          |   |                    |                                     |   |                    |                                       |   |                    |               |   |                    |                |   |                    |                   |   |                  |                   |   |                  |                     |   |                  |      |   |                  |          |    |                   |         |    |                   |                         |    |                   |                              |    |                   |                  |   |                  |                   |
| 9   | return_intox_1_9                                                                            | Friendly                                                                                                                                    |                                                                                                                                                                                                                                                                                                                                                                                                                                                                                                                                                                                                                                                                                                                                                                                                                                                                                                                                                                                                                                          |   |                    |                                     |   |                    |                                       |   |                    |               |   |                    |                |   |                    |                   |   |                  |                   |   |                  |                     |   |                  |      |   |                  |          |    |                   |         |    |                   |                         |    |                   |                              |    |                   |                  |   |                  |                   |
| 10  | return_intox_1_10                                                                           | Relaxed                                                                                                                                     |                                                                                                                                                                                                                                                                                                                                                                                                                                                                                                                                                                                                                                                                                                                                                                                                                                                                                                                                                                                                                                          |   |                    |                                     |   |                    |                                       |   |                    |               |   |                    |                |   |                    |                   |   |                  |                   |   |                  |                     |   |                  |      |   |                  |          |    |                   |         |    |                   |                         |    |                   |                              |    |                   |                  |   |                  |                   |
| 11  | return_intox_1_11                                                                           | Diffculty concentrating                                                                                                                     |                                                                                                                                                                                                                                                                                                                                                                                                                                                                                                                                                                                                                                                                                                                                                                                                                                                                                                                                                                                                                                          |   |                    |                                     |   |                    |                                       |   |                    |               |   |                    |                |   |                    |                   |   |                  |                   |   |                  |                     |   |                  |      |   |                  |          |    |                   |         |    |                   |                         |    |                   |                              |    |                   |                  |   |                  |                   |
| 12  | return_intox_1_12                                                                           | Feeling lightheaded or dizzy                                                                                                                |                                                                                                                                                                                                                                                                                                                                                                                                                                                                                                                                                                                                                                                                                                                                                                                                                                                                                                                                                                                                                                          |   |                    |                                     |   |                    |                                       |   |                    |               |   |                    |                |   |                    |                   |   |                  |                   |   |                  |                     |   |                  |      |   |                  |          |    |                   |         |    |                   |                         |    |                   |                              |    |                   |                  |   |                  |                   |
| 13  | return_intox_1_13                                                                           | Feeling confused                                                                                                                            |                                                                                                                                                                                                                                                                                                                                                                                                                                                                                                                                                                                                                                                                                                                                                                                                                                                                                                                                                                                                                                          |   |                    |                                     |   |                    |                                       |   |                    |               |   |                    |                |   |                    |                   |   |                  |                   |   |                  |                     |   |                  |      |   |                  |          |    |                   |         |    |                   |                         |    |                   |                              |    |                   |                  |   |                  |                   |
| 0   | return_intox_1_0                                                                            | None of the above                                                                                                                           |                                                                                                                                                                                                                                                                                                                                                                                                                                                                                                                                                                                                                                                                                                                                                                                                                                                                                                                                                                                                                                          |   |                    |                                     |   |                    |                                       |   |                    |               |   |                    |                |   |                    |                   |   |                  |                   |   |                  |                     |   |                  |      |   |                  |          |    |                   |         |    |                   |                         |    |                   |                              |    |                   |                  |   |                  |                   |
| 971 | <b>return_gi_1</b><br><br><b>Show the field ONLY if:</b><br><b>[return_wd_1] = '1'</b>      | <b>Section Header:</b> <i>Return GI 1</i><br><br><b>Which of the following gastrointestinal signs or symptoms were documented?</b>          | <b>checkbox</b><br><table border="1"> <tr><td>1</td><td>return_gi_1_1</td><td>Constipation</td></tr> <tr><td>2</td><td>return_gi_1_2</td><td>Turning of stomach/cramping/abdo pain</td></tr> <tr><td>3</td><td>return_gi_1_3</td><td>Nausea</td></tr> <tr><td>4</td><td>return_gi_1_4</td><td>Vomiting</td></tr> <tr><td>5</td><td>return_gi_1_5</td><td>Diarrhea</td></tr> <tr><td>0</td><td>return_gi_1_0</td><td>None of the above</td></tr> </table>                                                                                                                                                                                                                                                                                                                                                                                                                                                                                                                                                                                 | 1 | return_gi_1_1      | Constipation                        | 2 | return_gi_1_2      | Turning of stomach/cramping/abdo pain | 3 | return_gi_1_3      | Nausea        | 4 | return_gi_1_4      | Vomiting       | 5 | return_gi_1_5      | Diarrhea          | 0 | return_gi_1_0    | None of the above |   |                  |                     |   |                  |      |   |                  |          |    |                   |         |    |                   |                         |    |                   |                              |    |                   |                  |   |                  |                   |
| 1   | return_gi_1_1                                                                               | Constipation                                                                                                                                |                                                                                                                                                                                                                                                                                                                                                                                                                                                                                                                                                                                                                                                                                                                                                                                                                                                                                                                                                                                                                                          |   |                    |                                     |   |                    |                                       |   |                    |               |   |                    |                |   |                    |                   |   |                  |                   |   |                  |                     |   |                  |      |   |                  |          |    |                   |         |    |                   |                         |    |                   |                              |    |                   |                  |   |                  |                   |
| 2   | return_gi_1_2                                                                               | Turning of stomach/cramping/abdo pain                                                                                                       |                                                                                                                                                                                                                                                                                                                                                                                                                                                                                                                                                                                                                                                                                                                                                                                                                                                                                                                                                                                                                                          |   |                    |                                     |   |                    |                                       |   |                    |               |   |                    |                |   |                    |                   |   |                  |                   |   |                  |                     |   |                  |      |   |                  |          |    |                   |         |    |                   |                         |    |                   |                              |    |                   |                  |   |                  |                   |
| 3   | return_gi_1_3                                                                               | Nausea                                                                                                                                      |                                                                                                                                                                                                                                                                                                                                                                                                                                                                                                                                                                                                                                                                                                                                                                                                                                                                                                                                                                                                                                          |   |                    |                                     |   |                    |                                       |   |                    |               |   |                    |                |   |                    |                   |   |                  |                   |   |                  |                     |   |                  |      |   |                  |          |    |                   |         |    |                   |                         |    |                   |                              |    |                   |                  |   |                  |                   |
| 4   | return_gi_1_4                                                                               | Vomiting                                                                                                                                    |                                                                                                                                                                                                                                                                                                                                                                                                                                                                                                                                                                                                                                                                                                                                                                                                                                                                                                                                                                                                                                          |   |                    |                                     |   |                    |                                       |   |                    |               |   |                    |                |   |                    |                   |   |                  |                   |   |                  |                     |   |                  |      |   |                  |          |    |                   |         |    |                   |                         |    |                   |                              |    |                   |                  |   |                  |                   |
| 5   | return_gi_1_5                                                                               | Diarrhea                                                                                                                                    |                                                                                                                                                                                                                                                                                                                                                                                                                                                                                                                                                                                                                                                                                                                                                                                                                                                                                                                                                                                                                                          |   |                    |                                     |   |                    |                                       |   |                    |               |   |                    |                |   |                    |                   |   |                  |                   |   |                  |                     |   |                  |      |   |                  |          |    |                   |         |    |                   |                         |    |                   |                              |    |                   |                  |   |                  |                   |
| 0   | return_gi_1_0                                                                               | None of the above                                                                                                                           |                                                                                                                                                                                                                                                                                                                                                                                                                                                                                                                                                                                                                                                                                                                                                                                                                                                                                                                                                                                                                                          |   |                    |                                     |   |                    |                                       |   |                    |               |   |                    |                |   |                    |                   |   |                  |                   |   |                  |                     |   |                  |      |   |                  |          |    |                   |         |    |                   |                         |    |                   |                              |    |                   |                  |   |                  |                   |
| 972 | <b>return_anxiety_1</b><br><br><b>Show the field ONLY if:</b><br><b>[return_wd_1] = '1'</b> | <b>Section Header:</b> <i>Return Anxiety 1</i><br><br><b>Which of the following signs or symptoms of anxiety were documented?</b>           | <b>checkbox</b><br><table border="1"> <tr><td>1</td><td>return_anxiety_1_1</td><td>Anxiety, irritability, or agitation</td></tr> <tr><td>2</td><td>return_anxiety_1_2</td><td>Nervousness</td></tr> <tr><td>3</td><td>return_anxiety_1_3</td><td>Tremor</td></tr> <tr><td>4</td><td>return_anxiety_1_4</td><td>Restlessness</td></tr> <tr><td>0</td><td>return_anxiety_1_0</td><td>None of the above</td></tr> </table>                                                                                                                                                                                                                                                                                                                                                                                                                                                                                                                                                                                                                  | 1 | return_anxiety_1_1 | Anxiety, irritability, or agitation | 2 | return_anxiety_1_2 | Nervousness                           | 3 | return_anxiety_1_3 | Tremor        | 4 | return_anxiety_1_4 | Restlessness   | 0 | return_anxiety_1_0 | None of the above |   |                  |                   |   |                  |                     |   |                  |      |   |                  |          |    |                   |         |    |                   |                         |    |                   |                              |    |                   |                  |   |                  |                   |
| 1   | return_anxiety_1_1                                                                          | Anxiety, irritability, or agitation                                                                                                         |                                                                                                                                                                                                                                                                                                                                                                                                                                                                                                                                                                                                                                                                                                                                                                                                                                                                                                                                                                                                                                          |   |                    |                                     |   |                    |                                       |   |                    |               |   |                    |                |   |                    |                   |   |                  |                   |   |                  |                     |   |                  |      |   |                  |          |    |                   |         |    |                   |                         |    |                   |                              |    |                   |                  |   |                  |                   |
| 2   | return_anxiety_1_2                                                                          | Nervousness                                                                                                                                 |                                                                                                                                                                                                                                                                                                                                                                                                                                                                                                                                                                                                                                                                                                                                                                                                                                                                                                                                                                                                                                          |   |                    |                                     |   |                    |                                       |   |                    |               |   |                    |                |   |                    |                   |   |                  |                   |   |                  |                     |   |                  |      |   |                  |          |    |                   |         |    |                   |                         |    |                   |                              |    |                   |                  |   |                  |                   |
| 3   | return_anxiety_1_3                                                                          | Tremor                                                                                                                                      |                                                                                                                                                                                                                                                                                                                                                                                                                                                                                                                                                                                                                                                                                                                                                                                                                                                                                                                                                                                                                                          |   |                    |                                     |   |                    |                                       |   |                    |               |   |                    |                |   |                    |                   |   |                  |                   |   |                  |                     |   |                  |      |   |                  |          |    |                   |         |    |                   |                         |    |                   |                              |    |                   |                  |   |                  |                   |
| 4   | return_anxiety_1_4                                                                          | Restlessness                                                                                                                                |                                                                                                                                                                                                                                                                                                                                                                                                                                                                                                                                                                                                                                                                                                                                                                                                                                                                                                                                                                                                                                          |   |                    |                                     |   |                    |                                       |   |                    |               |   |                    |                |   |                    |                   |   |                  |                   |   |                  |                     |   |                  |      |   |                  |          |    |                   |         |    |                   |                         |    |                   |                              |    |                   |                  |   |                  |                   |
| 0   | return_anxiety_1_0                                                                          | None of the above                                                                                                                           |                                                                                                                                                                                                                                                                                                                                                                                                                                                                                                                                                                                                                                                                                                                                                                                                                                                                                                                                                                                                                                          |   |                    |                                     |   |                    |                                       |   |                    |               |   |                    |                |   |                    |                   |   |                  |                   |   |                  |                     |   |                  |      |   |                  |          |    |                   |         |    |                   |                         |    |                   |                              |    |                   |                  |   |                  |                   |

|                 |                                                                                                                                                                                                           |                                                                                                                                                      |                                                                                                                                                                                                                                                                                                                                                                                                                                                                                                                                                                                                                                                                                                                                                                                                                                                         |                 |  |  |   |                       |                          |   |                       |                                       |   |                       |             |   |                       |                        |   |                       |                                                    |   |                       |                                                   |   |                       |                                                      |   |                       |                   |
|-----------------|-----------------------------------------------------------------------------------------------------------------------------------------------------------------------------------------------------------|------------------------------------------------------------------------------------------------------------------------------------------------------|---------------------------------------------------------------------------------------------------------------------------------------------------------------------------------------------------------------------------------------------------------------------------------------------------------------------------------------------------------------------------------------------------------------------------------------------------------------------------------------------------------------------------------------------------------------------------------------------------------------------------------------------------------------------------------------------------------------------------------------------------------------------------------------------------------------------------------------------------------|-----------------|--|--|---|-----------------------|--------------------------|---|-----------------------|---------------------------------------|---|-----------------------|-------------|---|-----------------------|------------------------|---|-----------------------|----------------------------------------------------|---|-----------------------|---------------------------------------------------|---|-----------------------|------------------------------------------------------|---|-----------------------|-------------------|
| 973             | <b>return_withdrawal_1</b><br><br><b>Show the field ONLY if:</b><br><b>[return_wd_1] = '1'</b>                                                                                                            | <b>Section Header:</b> <i>Return Withdrawal 1</i><br><br><b>Which of the following signs or symptoms of withdrawal were documented?</b>              | <table border="1"> <tr> <td colspan="3"><b>checkbox</b></td> </tr> <tr> <td>1</td> <td>return_withdrawal_1_1</td> <td>Yawning</td> </tr> <tr> <td>2</td> <td>return_withdrawal_1_2</td> <td>Gooseflesh skin (chills/piloerection)</td> </tr> <tr> <td>3</td> <td>return_withdrawal_1_3</td> <td>Pulse &gt; 80</td> </tr> <tr> <td>4</td> <td>return_withdrawal_1_4</td> <td>Sweating (diaphoresis)</td> </tr> <tr> <td>5</td> <td>return_withdrawal_1_5</td> <td>Pupil size larger than normal (dilation/mydriasis)</td> </tr> <tr> <td>6</td> <td>return_withdrawal_1_6</td> <td>Bone, joint and body aches (arthralgias/myalgias)</td> </tr> <tr> <td>7</td> <td>return_withdrawal_1_7</td> <td>Runny nose or tearing (rhinorrhea or lacrimation)</td> </tr> <tr> <td>0</td> <td>return_withdrawal_1_0</td> <td>None of the above</td> </tr> </table> | <b>checkbox</b> |  |  | 1 | return_withdrawal_1_1 | Yawning                  | 2 | return_withdrawal_1_2 | Gooseflesh skin (chills/piloerection) | 3 | return_withdrawal_1_3 | Pulse > 80  | 4 | return_withdrawal_1_4 | Sweating (diaphoresis) | 5 | return_withdrawal_1_5 | Pupil size larger than normal (dilation/mydriasis) | 6 | return_withdrawal_1_6 | Bone, joint and body aches (arthralgias/myalgias) | 7 | return_withdrawal_1_7 | Runny nose or tearing (rhinorrhea or lacrimation)    | 0 | return_withdrawal_1_0 | None of the above |
| <b>checkbox</b> |                                                                                                                                                                                                           |                                                                                                                                                      |                                                                                                                                                                                                                                                                                                                                                                                                                                                                                                                                                                                                                                                                                                                                                                                                                                                         |                 |  |  |   |                       |                          |   |                       |                                       |   |                       |             |   |                       |                        |   |                       |                                                    |   |                       |                                                   |   |                       |                                                      |   |                       |                   |
| 1               | return_withdrawal_1_1                                                                                                                                                                                     | Yawning                                                                                                                                              |                                                                                                                                                                                                                                                                                                                                                                                                                                                                                                                                                                                                                                                                                                                                                                                                                                                         |                 |  |  |   |                       |                          |   |                       |                                       |   |                       |             |   |                       |                        |   |                       |                                                    |   |                       |                                                   |   |                       |                                                      |   |                       |                   |
| 2               | return_withdrawal_1_2                                                                                                                                                                                     | Gooseflesh skin (chills/piloerection)                                                                                                                |                                                                                                                                                                                                                                                                                                                                                                                                                                                                                                                                                                                                                                                                                                                                                                                                                                                         |                 |  |  |   |                       |                          |   |                       |                                       |   |                       |             |   |                       |                        |   |                       |                                                    |   |                       |                                                   |   |                       |                                                      |   |                       |                   |
| 3               | return_withdrawal_1_3                                                                                                                                                                                     | Pulse > 80                                                                                                                                           |                                                                                                                                                                                                                                                                                                                                                                                                                                                                                                                                                                                                                                                                                                                                                                                                                                                         |                 |  |  |   |                       |                          |   |                       |                                       |   |                       |             |   |                       |                        |   |                       |                                                    |   |                       |                                                   |   |                       |                                                      |   |                       |                   |
| 4               | return_withdrawal_1_4                                                                                                                                                                                     | Sweating (diaphoresis)                                                                                                                               |                                                                                                                                                                                                                                                                                                                                                                                                                                                                                                                                                                                                                                                                                                                                                                                                                                                         |                 |  |  |   |                       |                          |   |                       |                                       |   |                       |             |   |                       |                        |   |                       |                                                    |   |                       |                                                   |   |                       |                                                      |   |                       |                   |
| 5               | return_withdrawal_1_5                                                                                                                                                                                     | Pupil size larger than normal (dilation/mydriasis)                                                                                                   |                                                                                                                                                                                                                                                                                                                                                                                                                                                                                                                                                                                                                                                                                                                                                                                                                                                         |                 |  |  |   |                       |                          |   |                       |                                       |   |                       |             |   |                       |                        |   |                       |                                                    |   |                       |                                                   |   |                       |                                                      |   |                       |                   |
| 6               | return_withdrawal_1_6                                                                                                                                                                                     | Bone, joint and body aches (arthralgias/myalgias)                                                                                                    |                                                                                                                                                                                                                                                                                                                                                                                                                                                                                                                                                                                                                                                                                                                                                                                                                                                         |                 |  |  |   |                       |                          |   |                       |                                       |   |                       |             |   |                       |                        |   |                       |                                                    |   |                       |                                                   |   |                       |                                                      |   |                       |                   |
| 7               | return_withdrawal_1_7                                                                                                                                                                                     | Runny nose or tearing (rhinorrhea or lacrimation)                                                                                                    |                                                                                                                                                                                                                                                                                                                                                                                                                                                                                                                                                                                                                                                                                                                                                                                                                                                         |                 |  |  |   |                       |                          |   |                       |                                       |   |                       |             |   |                       |                        |   |                       |                                                    |   |                       |                                                   |   |                       |                                                      |   |                       |                   |
| 0               | return_withdrawal_1_0                                                                                                                                                                                     | None of the above                                                                                                                                    |                                                                                                                                                                                                                                                                                                                                                                                                                                                                                                                                                                                                                                                                                                                                                                                                                                                         |                 |  |  |   |                       |                          |   |                       |                                       |   |                       |             |   |                       |                        |   |                       |                                                    |   |                       |                                                   |   |                       |                                                      |   |                       |                   |
| 974             | <b>return_vitals_1</b><br><br><b>Show the field ONLY if:</b><br><b>[return_wd_1] = '1'</b>                                                                                                                | <b>Section Header:</b> <i>Return Abnormal Vitals 1</i><br><br><b>Which of the following abnormal vital signs were documented?</b>                    | <table border="1"> <tr> <td colspan="3"><b>checkbox</b></td> </tr> <tr> <td>1</td> <td>return_vitals_1_1</td> <td>Hypoxia</td> </tr> <tr> <td>2</td> <td>return_vitals_1_2</td> <td>Hypercarbia</td> </tr> <tr> <td>3</td> <td>return_vitals_1_3</td> <td>Hypotension</td> </tr> <tr> <td>4</td> <td>return_vitals_1_4</td> <td>Bradycardia</td> </tr> <tr> <td>0</td> <td>return_vitals_1_0</td> <td>None of the above</td> </tr> </table>                                                                                                                                                                                                                                                                                                                                                                                                             | <b>checkbox</b> |  |  | 1 | return_vitals_1_1     | Hypoxia                  | 2 | return_vitals_1_2     | Hypercarbia                           | 3 | return_vitals_1_3     | Hypotension | 4 | return_vitals_1_4     | Bradycardia            | 0 | return_vitals_1_0     | None of the above                                  |   |                       |                                                   |   |                       |                                                      |   |                       |                   |
| <b>checkbox</b> |                                                                                                                                                                                                           |                                                                                                                                                      |                                                                                                                                                                                                                                                                                                                                                                                                                                                                                                                                                                                                                                                                                                                                                                                                                                                         |                 |  |  |   |                       |                          |   |                       |                                       |   |                       |             |   |                       |                        |   |                       |                                                    |   |                       |                                                   |   |                       |                                                      |   |                       |                   |
| 1               | return_vitals_1_1                                                                                                                                                                                         | Hypoxia                                                                                                                                              |                                                                                                                                                                                                                                                                                                                                                                                                                                                                                                                                                                                                                                                                                                                                                                                                                                                         |                 |  |  |   |                       |                          |   |                       |                                       |   |                       |             |   |                       |                        |   |                       |                                                    |   |                       |                                                   |   |                       |                                                      |   |                       |                   |
| 2               | return_vitals_1_2                                                                                                                                                                                         | Hypercarbia                                                                                                                                          |                                                                                                                                                                                                                                                                                                                                                                                                                                                                                                                                                                                                                                                                                                                                                                                                                                                         |                 |  |  |   |                       |                          |   |                       |                                       |   |                       |             |   |                       |                        |   |                       |                                                    |   |                       |                                                   |   |                       |                                                      |   |                       |                   |
| 3               | return_vitals_1_3                                                                                                                                                                                         | Hypotension                                                                                                                                          |                                                                                                                                                                                                                                                                                                                                                                                                                                                                                                                                                                                                                                                                                                                                                                                                                                                         |                 |  |  |   |                       |                          |   |                       |                                       |   |                       |             |   |                       |                        |   |                       |                                                    |   |                       |                                                   |   |                       |                                                      |   |                       |                   |
| 4               | return_vitals_1_4                                                                                                                                                                                         | Bradycardia                                                                                                                                          |                                                                                                                                                                                                                                                                                                                                                                                                                                                                                                                                                                                                                                                                                                                                                                                                                                                         |                 |  |  |   |                       |                          |   |                       |                                       |   |                       |             |   |                       |                        |   |                       |                                                    |   |                       |                                                   |   |                       |                                                      |   |                       |                   |
| 0               | return_vitals_1_0                                                                                                                                                                                         | None of the above                                                                                                                                    |                                                                                                                                                                                                                                                                                                                                                                                                                                                                                                                                                                                                                                                                                                                                                                                                                                                         |                 |  |  |   |                       |                          |   |                       |                                       |   |                       |             |   |                       |                        |   |                       |                                                    |   |                       |                                                   |   |                       |                                                      |   |                       |                   |
| 975             | <b>return_misc_1</b><br><br><b>Show the field ONLY if:</b><br><b>[return_wd_1] = '1'</b>                                                                                                                  | <b>Section Header:</b> <i>Return Miscellaneous 1</i><br><br><b>Which of the following miscellaneous opioid related side effects were documented?</b> | <table border="1"> <tr> <td colspan="3"><b>checkbox</b></td> </tr> <tr> <td>1</td> <td>return_misc_1_1</td> <td>Difficulty passing urine</td> </tr> <tr> <td>2</td> <td>return_misc_1_2</td> <td>Itchiness</td> </tr> <tr> <td>3</td> <td>return_misc_1_3</td> <td>Dry mouth</td> </tr> <tr> <td>4</td> <td>return_misc_1_4</td> <td>Headache</td> </tr> <tr> <td>5</td> <td>return_misc_1_5</td> <td>Unable to walk</td> </tr> <tr> <td>6</td> <td>return_misc_1_6</td> <td>Unable to discharge</td> </tr> <tr> <td>7</td> <td>return_misc_1_7</td> <td>Pupil size smaller than normal (constriction/miosis)</td> </tr> <tr> <td>0</td> <td>return_misc_1_0</td> <td>None of the above</td> </tr> </table>                                                                                                                                             | <b>checkbox</b> |  |  | 1 | return_misc_1_1       | Difficulty passing urine | 2 | return_misc_1_2       | Itchiness                             | 3 | return_misc_1_3       | Dry mouth   | 4 | return_misc_1_4       | Headache               | 5 | return_misc_1_5       | Unable to walk                                     | 6 | return_misc_1_6       | Unable to discharge                               | 7 | return_misc_1_7       | Pupil size smaller than normal (constriction/miosis) | 0 | return_misc_1_0       | None of the above |
| <b>checkbox</b> |                                                                                                                                                                                                           |                                                                                                                                                      |                                                                                                                                                                                                                                                                                                                                                                                                                                                                                                                                                                                                                                                                                                                                                                                                                                                         |                 |  |  |   |                       |                          |   |                       |                                       |   |                       |             |   |                       |                        |   |                       |                                                    |   |                       |                                                   |   |                       |                                                      |   |                       |                   |
| 1               | return_misc_1_1                                                                                                                                                                                           | Difficulty passing urine                                                                                                                             |                                                                                                                                                                                                                                                                                                                                                                                                                                                                                                                                                                                                                                                                                                                                                                                                                                                         |                 |  |  |   |                       |                          |   |                       |                                       |   |                       |             |   |                       |                        |   |                       |                                                    |   |                       |                                                   |   |                       |                                                      |   |                       |                   |
| 2               | return_misc_1_2                                                                                                                                                                                           | Itchiness                                                                                                                                            |                                                                                                                                                                                                                                                                                                                                                                                                                                                                                                                                                                                                                                                                                                                                                                                                                                                         |                 |  |  |   |                       |                          |   |                       |                                       |   |                       |             |   |                       |                        |   |                       |                                                    |   |                       |                                                   |   |                       |                                                      |   |                       |                   |
| 3               | return_misc_1_3                                                                                                                                                                                           | Dry mouth                                                                                                                                            |                                                                                                                                                                                                                                                                                                                                                                                                                                                                                                                                                                                                                                                                                                                                                                                                                                                         |                 |  |  |   |                       |                          |   |                       |                                       |   |                       |             |   |                       |                        |   |                       |                                                    |   |                       |                                                   |   |                       |                                                      |   |                       |                   |
| 4               | return_misc_1_4                                                                                                                                                                                           | Headache                                                                                                                                             |                                                                                                                                                                                                                                                                                                                                                                                                                                                                                                                                                                                                                                                                                                                                                                                                                                                         |                 |  |  |   |                       |                          |   |                       |                                       |   |                       |             |   |                       |                        |   |                       |                                                    |   |                       |                                                   |   |                       |                                                      |   |                       |                   |
| 5               | return_misc_1_5                                                                                                                                                                                           | Unable to walk                                                                                                                                       |                                                                                                                                                                                                                                                                                                                                                                                                                                                                                                                                                                                                                                                                                                                                                                                                                                                         |                 |  |  |   |                       |                          |   |                       |                                       |   |                       |             |   |                       |                        |   |                       |                                                    |   |                       |                                                   |   |                       |                                                      |   |                       |                   |
| 6               | return_misc_1_6                                                                                                                                                                                           | Unable to discharge                                                                                                                                  |                                                                                                                                                                                                                                                                                                                                                                                                                                                                                                                                                                                                                                                                                                                                                                                                                                                         |                 |  |  |   |                       |                          |   |                       |                                       |   |                       |             |   |                       |                        |   |                       |                                                    |   |                       |                                                   |   |                       |                                                      |   |                       |                   |
| 7               | return_misc_1_7                                                                                                                                                                                           | Pupil size smaller than normal (constriction/miosis)                                                                                                 |                                                                                                                                                                                                                                                                                                                                                                                                                                                                                                                                                                                                                                                                                                                                                                                                                                                         |                 |  |  |   |                       |                          |   |                       |                                       |   |                       |             |   |                       |                        |   |                       |                                                    |   |                       |                                                   |   |                       |                                                      |   |                       |                   |
| 0               | return_misc_1_0                                                                                                                                                                                           | None of the above                                                                                                                                    |                                                                                                                                                                                                                                                                                                                                                                                                                                                                                                                                                                                                                                                                                                                                                                                                                                                         |                 |  |  |   |                       |                          |   |                       |                                       |   |                       |             |   |                       |                        |   |                       |                                                    |   |                       |                                                   |   |                       |                                                      |   |                       |                   |
| 976             | <b>datetime_return_2</b><br><br><b>Show the field ONLY if:</b><br><b>[return_num] = '2' or [return_num] = '3' or [return_num] = '4' or [return_num] = '5' or [return_num] = '6' or [return_num] = '7'</b> | <b>Section Header:</b> <i>Second Return Visit</i><br><br><b>Date and time of arrival</b>                                                             | <b>text (datetime_mdy)</b>                                                                                                                                                                                                                                                                                                                                                                                                                                                                                                                                                                                                                                                                                                                                                                                                                              |                 |  |  |   |                       |                          |   |                       |                                       |   |                       |             |   |                       |                        |   |                       |                                                    |   |                       |                                                   |   |                       |                                                      |   |                       |                   |



| 977             | <p><b>return_redcap_2</b></p> <p>Show the field ONLY if:<br/>[return_num] = '2' or [return_num] = '3' or [return_num] = '4' or [return_num] = '5' or [return_num] = '6' or [return_num] = '7'</p>       | <p><b>Does this encounter coincide with an existing visit in REDCap?</b></p>                                         | <p><b>yesno</b></p> <table border="1"> <tr> <td>1</td> <td>Yes</td> </tr> <tr> <td>0</td> <td>No</td> </tr> </table>                                                                                                                                                                                                                                                                                                                                                                                                                                                                                                                                                                                                                                                                                                                                                                                                                                                                                                                                               | 1               | Yes | 0 | No |                      |                                   |   |                      |          |   |                      |         |   |                      |          |   |                      |                                   |   |                      |     |   |                      |            |   |                      |         |   |                      |         |    |                       |                 |    |                       |                         |     |                        |             |
|-----------------|---------------------------------------------------------------------------------------------------------------------------------------------------------------------------------------------------------|----------------------------------------------------------------------------------------------------------------------|--------------------------------------------------------------------------------------------------------------------------------------------------------------------------------------------------------------------------------------------------------------------------------------------------------------------------------------------------------------------------------------------------------------------------------------------------------------------------------------------------------------------------------------------------------------------------------------------------------------------------------------------------------------------------------------------------------------------------------------------------------------------------------------------------------------------------------------------------------------------------------------------------------------------------------------------------------------------------------------------------------------------------------------------------------------------|-----------------|-----|---|----|----------------------|-----------------------------------|---|----------------------|----------|---|----------------------|---------|---|----------------------|----------|---|----------------------|-----------------------------------|---|----------------------|-----|---|----------------------|------------|---|----------------------|---------|---|----------------------|---------|----|-----------------------|-----------------|----|-----------------------|-------------------------|-----|------------------------|-------------|
| 1               | Yes                                                                                                                                                                                                     |                                                                                                                      |                                                                                                                                                                                                                                                                                                                                                                                                                                                                                                                                                                                                                                                                                                                                                                                                                                                                                                                                                                                                                                                                    |                 |     |   |    |                      |                                   |   |                      |          |   |                      |         |   |                      |          |   |                      |                                   |   |                      |     |   |                      |            |   |                      |         |   |                      |         |    |                       |                 |    |                       |                         |     |                        |             |
| 0               | No                                                                                                                                                                                                      |                                                                                                                      |                                                                                                                                                                                                                                                                                                                                                                                                                                                                                                                                                                                                                                                                                                                                                                                                                                                                                                                                                                                                                                                                    |                 |     |   |    |                      |                                   |   |                      |          |   |                      |         |   |                      |          |   |                      |                                   |   |                      |     |   |                      |            |   |                      |         |   |                      |         |    |                       |                 |    |                       |                         |     |                        |             |
| 978             | <p><b>return_redcap_spec_2</b></p> <p>Show the field ONLY if:<br/>[return_redcap_2] = '1'</p>                                                                                                           | <p><b>Please enter the visit number</b></p>                                                                          | <p><b>text</b></p>                                                                                                                                                                                                                                                                                                                                                                                                                                                                                                                                                                                                                                                                                                                                                                                                                                                                                                                                                                                                                                                 |                 |     |   |    |                      |                                   |   |                      |          |   |                      |         |   |                      |          |   |                      |                                   |   |                      |     |   |                      |            |   |                      |         |   |                      |         |    |                       |                 |    |                       |                         |     |                        |             |
| 979             | <p><b>return_od_2</b></p> <p>Show the field ONLY if:<br/>[return_num] = '2' or [return_num] = '3' or [return_num] = '4' or [return_num] = '5' or [return_num] = '6' or [return_num] = '7'</p>           | <p><b>Did the patient present to the ED for opioid overdose?</b></p>                                                 | <p><b>yesno</b></p> <table border="1"> <tr> <td>1</td> <td>Yes</td> </tr> <tr> <td>0</td> <td>No</td> </tr> </table>                                                                                                                                                                                                                                                                                                                                                                                                                                                                                                                                                                                                                                                                                                                                                                                                                                                                                                                                               | 1               | Yes | 0 | No |                      |                                   |   |                      |          |   |                      |         |   |                      |          |   |                      |                                   |   |                      |     |   |                      |            |   |                      |         |   |                      |         |    |                       |                 |    |                       |                         |     |                        |             |
| 1               | Yes                                                                                                                                                                                                     |                                                                                                                      |                                                                                                                                                                                                                                                                                                                                                                                                                                                                                                                                                                                                                                                                                                                                                                                                                                                                                                                                                                                                                                                                    |                 |     |   |    |                      |                                   |   |                      |          |   |                      |         |   |                      |          |   |                      |                                   |   |                      |     |   |                      |            |   |                      |         |   |                      |         |    |                       |                 |    |                       |                         |     |                        |             |
| 0               | No                                                                                                                                                                                                      |                                                                                                                      |                                                                                                                                                                                                                                                                                                                                                                                                                                                                                                                                                                                                                                                                                                                                                                                                                                                                                                                                                                                                                                                                    |                 |     |   |    |                      |                                   |   |                      |          |   |                      |         |   |                      |          |   |                      |                                   |   |                      |     |   |                      |            |   |                      |         |   |                      |         |    |                       |                 |    |                       |                         |     |                        |             |
| 980             | <p><b>return_substance_yn_2</b></p> <p>Show the field ONLY if:<br/>[return_num] = '2' or [return_num] = '3' or [return_num] = '4' or [return_num] = '5' or [return_num] = '6' or [return_num] = '7'</p> | <p><b>Did the patient or provider report any substance use between the index ED visit and this return visit?</b></p> | <p><b>yesno</b></p> <table border="1"> <tr> <td>1</td> <td>Yes</td> </tr> <tr> <td>0</td> <td>No</td> </tr> </table>                                                                                                                                                                                                                                                                                                                                                                                                                                                                                                                                                                                                                                                                                                                                                                                                                                                                                                                                               | 1               | Yes | 0 | No |                      |                                   |   |                      |          |   |                      |         |   |                      |          |   |                      |                                   |   |                      |     |   |                      |            |   |                      |         |   |                      |         |    |                       |                 |    |                       |                         |     |                        |             |
| 1               | Yes                                                                                                                                                                                                     |                                                                                                                      |                                                                                                                                                                                                                                                                                                                                                                                                                                                                                                                                                                                                                                                                                                                                                                                                                                                                                                                                                                                                                                                                    |                 |     |   |    |                      |                                   |   |                      |          |   |                      |         |   |                      |          |   |                      |                                   |   |                      |     |   |                      |            |   |                      |         |   |                      |         |    |                       |                 |    |                       |                         |     |                        |             |
| 0               | No                                                                                                                                                                                                      |                                                                                                                      |                                                                                                                                                                                                                                                                                                                                                                                                                                                                                                                                                                                                                                                                                                                                                                                                                                                                                                                                                                                                                                                                    |                 |     |   |    |                      |                                   |   |                      |          |   |                      |         |   |                      |          |   |                      |                                   |   |                      |     |   |                      |            |   |                      |         |   |                      |         |    |                       |                 |    |                       |                         |     |                        |             |
| 981             | <p><b>return_substance_2</b></p> <p>Show the field ONLY if:<br/>[return_substance_yn_2] = '1'</p>                                                                                                       | <p><b>Which substance(s) did the patient use?</b></p>                                                                | <table border="1"> <thead> <tr> <th colspan="3"><b>checkbox</b></th> </tr> </thead> <tbody> <tr> <td>1</td> <td>return_substance_2_1</td> <td>Opioids (not including buprenorph</td> </tr> <tr> <td>2</td> <td>return_substance_2_2</td> <td>Methamph</td> </tr> <tr> <td>3</td> <td>return_substance_2_3</td> <td>Cocaine</td> </tr> <tr> <td>4</td> <td>return_substance_2_4</td> <td>Cannabis</td> </tr> <tr> <td>5</td> <td>return_substance_2_5</td> <td>Hallucinoge (including Ecstasy/MD</td> </tr> <tr> <td>6</td> <td>return_substance_2_6</td> <td>LSD</td> </tr> <tr> <td>7</td> <td>return_substance_2_7</td> <td>Benzodiaze</td> </tr> <tr> <td>8</td> <td>return_substance_2_8</td> <td>Alcohol</td> </tr> <tr> <td>9</td> <td>return_substance_2_9</td> <td>Tobacco</td> </tr> <tr> <td>10</td> <td>return_substance_2_10</td> <td>Other stimu NOS</td> </tr> <tr> <td>11</td> <td>return_substance_2_11</td> <td>Other (note heavy usage</td> </tr> <tr> <td>999</td> <td>return_substance_2_999</td> <td>None of the</td> </tr> </tbody> </table> | <b>checkbox</b> |     |   | 1  | return_substance_2_1 | Opioids (not including buprenorph | 2 | return_substance_2_2 | Methamph | 3 | return_substance_2_3 | Cocaine | 4 | return_substance_2_4 | Cannabis | 5 | return_substance_2_5 | Hallucinoge (including Ecstasy/MD | 6 | return_substance_2_6 | LSD | 7 | return_substance_2_7 | Benzodiaze | 8 | return_substance_2_8 | Alcohol | 9 | return_substance_2_9 | Tobacco | 10 | return_substance_2_10 | Other stimu NOS | 11 | return_substance_2_11 | Other (note heavy usage | 999 | return_substance_2_999 | None of the |
| <b>checkbox</b> |                                                                                                                                                                                                         |                                                                                                                      |                                                                                                                                                                                                                                                                                                                                                                                                                                                                                                                                                                                                                                                                                                                                                                                                                                                                                                                                                                                                                                                                    |                 |     |   |    |                      |                                   |   |                      |          |   |                      |         |   |                      |          |   |                      |                                   |   |                      |     |   |                      |            |   |                      |         |   |                      |         |    |                       |                 |    |                       |                         |     |                        |             |
| 1               | return_substance_2_1                                                                                                                                                                                    | Opioids (not including buprenorph                                                                                    |                                                                                                                                                                                                                                                                                                                                                                                                                                                                                                                                                                                                                                                                                                                                                                                                                                                                                                                                                                                                                                                                    |                 |     |   |    |                      |                                   |   |                      |          |   |                      |         |   |                      |          |   |                      |                                   |   |                      |     |   |                      |            |   |                      |         |   |                      |         |    |                       |                 |    |                       |                         |     |                        |             |
| 2               | return_substance_2_2                                                                                                                                                                                    | Methamph                                                                                                             |                                                                                                                                                                                                                                                                                                                                                                                                                                                                                                                                                                                                                                                                                                                                                                                                                                                                                                                                                                                                                                                                    |                 |     |   |    |                      |                                   |   |                      |          |   |                      |         |   |                      |          |   |                      |                                   |   |                      |     |   |                      |            |   |                      |         |   |                      |         |    |                       |                 |    |                       |                         |     |                        |             |
| 3               | return_substance_2_3                                                                                                                                                                                    | Cocaine                                                                                                              |                                                                                                                                                                                                                                                                                                                                                                                                                                                                                                                                                                                                                                                                                                                                                                                                                                                                                                                                                                                                                                                                    |                 |     |   |    |                      |                                   |   |                      |          |   |                      |         |   |                      |          |   |                      |                                   |   |                      |     |   |                      |            |   |                      |         |   |                      |         |    |                       |                 |    |                       |                         |     |                        |             |
| 4               | return_substance_2_4                                                                                                                                                                                    | Cannabis                                                                                                             |                                                                                                                                                                                                                                                                                                                                                                                                                                                                                                                                                                                                                                                                                                                                                                                                                                                                                                                                                                                                                                                                    |                 |     |   |    |                      |                                   |   |                      |          |   |                      |         |   |                      |          |   |                      |                                   |   |                      |     |   |                      |            |   |                      |         |   |                      |         |    |                       |                 |    |                       |                         |     |                        |             |
| 5               | return_substance_2_5                                                                                                                                                                                    | Hallucinoge (including Ecstasy/MD                                                                                    |                                                                                                                                                                                                                                                                                                                                                                                                                                                                                                                                                                                                                                                                                                                                                                                                                                                                                                                                                                                                                                                                    |                 |     |   |    |                      |                                   |   |                      |          |   |                      |         |   |                      |          |   |                      |                                   |   |                      |     |   |                      |            |   |                      |         |   |                      |         |    |                       |                 |    |                       |                         |     |                        |             |
| 6               | return_substance_2_6                                                                                                                                                                                    | LSD                                                                                                                  |                                                                                                                                                                                                                                                                                                                                                                                                                                                                                                                                                                                                                                                                                                                                                                                                                                                                                                                                                                                                                                                                    |                 |     |   |    |                      |                                   |   |                      |          |   |                      |         |   |                      |          |   |                      |                                   |   |                      |     |   |                      |            |   |                      |         |   |                      |         |    |                       |                 |    |                       |                         |     |                        |             |
| 7               | return_substance_2_7                                                                                                                                                                                    | Benzodiaze                                                                                                           |                                                                                                                                                                                                                                                                                                                                                                                                                                                                                                                                                                                                                                                                                                                                                                                                                                                                                                                                                                                                                                                                    |                 |     |   |    |                      |                                   |   |                      |          |   |                      |         |   |                      |          |   |                      |                                   |   |                      |     |   |                      |            |   |                      |         |   |                      |         |    |                       |                 |    |                       |                         |     |                        |             |
| 8               | return_substance_2_8                                                                                                                                                                                    | Alcohol                                                                                                              |                                                                                                                                                                                                                                                                                                                                                                                                                                                                                                                                                                                                                                                                                                                                                                                                                                                                                                                                                                                                                                                                    |                 |     |   |    |                      |                                   |   |                      |          |   |                      |         |   |                      |          |   |                      |                                   |   |                      |     |   |                      |            |   |                      |         |   |                      |         |    |                       |                 |    |                       |                         |     |                        |             |
| 9               | return_substance_2_9                                                                                                                                                                                    | Tobacco                                                                                                              |                                                                                                                                                                                                                                                                                                                                                                                                                                                                                                                                                                                                                                                                                                                                                                                                                                                                                                                                                                                                                                                                    |                 |     |   |    |                      |                                   |   |                      |          |   |                      |         |   |                      |          |   |                      |                                   |   |                      |     |   |                      |            |   |                      |         |   |                      |         |    |                       |                 |    |                       |                         |     |                        |             |
| 10              | return_substance_2_10                                                                                                                                                                                   | Other stimu NOS                                                                                                      |                                                                                                                                                                                                                                                                                                                                                                                                                                                                                                                                                                                                                                                                                                                                                                                                                                                                                                                                                                                                                                                                    |                 |     |   |    |                      |                                   |   |                      |          |   |                      |         |   |                      |          |   |                      |                                   |   |                      |     |   |                      |            |   |                      |         |   |                      |         |    |                       |                 |    |                       |                         |     |                        |             |
| 11              | return_substance_2_11                                                                                                                                                                                   | Other (note heavy usage                                                                                              |                                                                                                                                                                                                                                                                                                                                                                                                                                                                                                                                                                                                                                                                                                                                                                                                                                                                                                                                                                                                                                                                    |                 |     |   |    |                      |                                   |   |                      |          |   |                      |         |   |                      |          |   |                      |                                   |   |                      |     |   |                      |            |   |                      |         |   |                      |         |    |                       |                 |    |                       |                         |     |                        |             |
| 999             | return_substance_2_999                                                                                                                                                                                  | None of the                                                                                                          |                                                                                                                                                                                                                                                                                                                                                                                                                                                                                                                                                                                                                                                                                                                                                                                                                                                                                                                                                                                                                                                                    |                 |     |   |    |                      |                                   |   |                      |          |   |                      |         |   |                      |          |   |                      |                                   |   |                      |     |   |                      |            |   |                      |         |   |                      |         |    |                       |                 |    |                       |                         |     |                        |             |

|     |                                                                                                                                                                                          |                                                                                |                                                                                                                                                                                                                                                                                                                                                                                                                                                                                                                                                                                                                                                                                                                                                                                                                                                                                                                                                                                                                                                                                              |   |                      |           |    |                      |                                       |   |                      |                                    |   |                      |                              |   |                      |                          |   |                      |           |   |                      |         |   |                      |              |   |                      |           |    |                       |             |    |                       |           |    |                       |           |    |                       |       |     |                        |             |
|-----|------------------------------------------------------------------------------------------------------------------------------------------------------------------------------------------|--------------------------------------------------------------------------------|----------------------------------------------------------------------------------------------------------------------------------------------------------------------------------------------------------------------------------------------------------------------------------------------------------------------------------------------------------------------------------------------------------------------------------------------------------------------------------------------------------------------------------------------------------------------------------------------------------------------------------------------------------------------------------------------------------------------------------------------------------------------------------------------------------------------------------------------------------------------------------------------------------------------------------------------------------------------------------------------------------------------------------------------------------------------------------------------|---|----------------------|-----------|----|----------------------|---------------------------------------|---|----------------------|------------------------------------|---|----------------------|------------------------------|---|----------------------|--------------------------|---|----------------------|-----------|---|----------------------|---------|---|----------------------|--------------|---|----------------------|-----------|----|-----------------------|-------------|----|-----------------------|-----------|----|-----------------------|-----------|----|-----------------------|-------|-----|------------------------|-------------|
| 982 | <p>return_substance_oth_2</p> <p>Show the field ONLY if:<br/>[return_substance_2(11)] = '1'</p>                                                                                          | If "Other," please specify.                                                    | text                                                                                                                                                                                                                                                                                                                                                                                                                                                                                                                                                                                                                                                                                                                                                                                                                                                                                                                                                                                                                                                                                         |   |                      |           |    |                      |                                       |   |                      |                                    |   |                      |                              |   |                      |                          |   |                      |           |   |                      |         |   |                      |              |   |                      |           |    |                       |             |    |                       |           |    |                       |           |    |                       |       |     |                        |             |
| 983 | <p>return_opioid_2</p> <p>Show the field ONLY if:<br/>[return_substance_2(1)] = '1'</p>                                                                                                  | Which opioid(s) did the patient use?                                           | <p>checkbox</p> <table border="1"> <tr> <td>1</td> <td>return_opioid_2_1</td> <td>Heroin</td> </tr> <tr> <td>2</td> <td>return_opioid_2_2</td> <td>Oxycodone (OxyContin, Percocet, etc.)</td> </tr> <tr> <td>3</td> <td>return_opioid_2_3</td> <td>Hydrocodone (Norco, Vicodin, etc.)</td> </tr> <tr> <td>4</td> <td>return_opioid_2_4</td> <td>Fentanyl (Duragesic, Ionsys)</td> </tr> <tr> <td>5</td> <td>return_opioid_2_5</td> <td>Hydromorphone (Dilaudid)</td> </tr> <tr> <td>6</td> <td>return_opioid_2_6</td> <td>Morphine</td> </tr> <tr> <td>7</td> <td>return_opioid_2_7</td> <td>Other</td> </tr> </table>                                                                                                                                                                                                                                                                                                                                                                                                                                                                       | 1 | return_opioid_2_1    | Heroin    | 2  | return_opioid_2_2    | Oxycodone (OxyContin, Percocet, etc.) | 3 | return_opioid_2_3    | Hydrocodone (Norco, Vicodin, etc.) | 4 | return_opioid_2_4    | Fentanyl (Duragesic, Ionsys) | 5 | return_opioid_2_5    | Hydromorphone (Dilaudid) | 6 | return_opioid_2_6    | Morphine  | 7 | return_opioid_2_7    | Other   |   |                      |              |   |                      |           |    |                       |             |    |                       |           |    |                       |           |    |                       |       |     |                        |             |
| 1   | return_opioid_2_1                                                                                                                                                                        | Heroin                                                                         |                                                                                                                                                                                                                                                                                                                                                                                                                                                                                                                                                                                                                                                                                                                                                                                                                                                                                                                                                                                                                                                                                              |   |                      |           |    |                      |                                       |   |                      |                                    |   |                      |                              |   |                      |                          |   |                      |           |   |                      |         |   |                      |              |   |                      |           |    |                       |             |    |                       |           |    |                       |           |    |                       |       |     |                        |             |
| 2   | return_opioid_2_2                                                                                                                                                                        | Oxycodone (OxyContin, Percocet, etc.)                                          |                                                                                                                                                                                                                                                                                                                                                                                                                                                                                                                                                                                                                                                                                                                                                                                                                                                                                                                                                                                                                                                                                              |   |                      |           |    |                      |                                       |   |                      |                                    |   |                      |                              |   |                      |                          |   |                      |           |   |                      |         |   |                      |              |   |                      |           |    |                       |             |    |                       |           |    |                       |           |    |                       |       |     |                        |             |
| 3   | return_opioid_2_3                                                                                                                                                                        | Hydrocodone (Norco, Vicodin, etc.)                                             |                                                                                                                                                                                                                                                                                                                                                                                                                                                                                                                                                                                                                                                                                                                                                                                                                                                                                                                                                                                                                                                                                              |   |                      |           |    |                      |                                       |   |                      |                                    |   |                      |                              |   |                      |                          |   |                      |           |   |                      |         |   |                      |              |   |                      |           |    |                       |             |    |                       |           |    |                       |           |    |                       |       |     |                        |             |
| 4   | return_opioid_2_4                                                                                                                                                                        | Fentanyl (Duragesic, Ionsys)                                                   |                                                                                                                                                                                                                                                                                                                                                                                                                                                                                                                                                                                                                                                                                                                                                                                                                                                                                                                                                                                                                                                                                              |   |                      |           |    |                      |                                       |   |                      |                                    |   |                      |                              |   |                      |                          |   |                      |           |   |                      |         |   |                      |              |   |                      |           |    |                       |             |    |                       |           |    |                       |           |    |                       |       |     |                        |             |
| 5   | return_opioid_2_5                                                                                                                                                                        | Hydromorphone (Dilaudid)                                                       |                                                                                                                                                                                                                                                                                                                                                                                                                                                                                                                                                                                                                                                                                                                                                                                                                                                                                                                                                                                                                                                                                              |   |                      |           |    |                      |                                       |   |                      |                                    |   |                      |                              |   |                      |                          |   |                      |           |   |                      |         |   |                      |              |   |                      |           |    |                       |             |    |                       |           |    |                       |           |    |                       |       |     |                        |             |
| 6   | return_opioid_2_6                                                                                                                                                                        | Morphine                                                                       |                                                                                                                                                                                                                                                                                                                                                                                                                                                                                                                                                                                                                                                                                                                                                                                                                                                                                                                                                                                                                                                                                              |   |                      |           |    |                      |                                       |   |                      |                                    |   |                      |                              |   |                      |                          |   |                      |           |   |                      |         |   |                      |              |   |                      |           |    |                       |             |    |                       |           |    |                       |           |    |                       |       |     |                        |             |
| 7   | return_opioid_2_7                                                                                                                                                                        | Other                                                                          |                                                                                                                                                                                                                                                                                                                                                                                                                                                                                                                                                                                                                                                                                                                                                                                                                                                                                                                                                                                                                                                                                              |   |                      |           |    |                      |                                       |   |                      |                                    |   |                      |                              |   |                      |                          |   |                      |           |   |                      |         |   |                      |              |   |                      |           |    |                       |             |    |                       |           |    |                       |           |    |                       |       |     |                        |             |
| 984 | <p>return_opioid_oth_2</p> <p>Show the field ONLY if:<br/>[return_opioid_2(7)] = '1'</p>                                                                                                 | If "Other," please specify.                                                    | text                                                                                                                                                                                                                                                                                                                                                                                                                                                                                                                                                                                                                                                                                                                                                                                                                                                                                                                                                                                                                                                                                         |   |                      |           |    |                      |                                       |   |                      |                                    |   |                      |                              |   |                      |                          |   |                      |           |   |                      |         |   |                      |              |   |                      |           |    |                       |             |    |                       |           |    |                       |           |    |                       |       |     |                        |             |
| 985 | <p>return_utox_2</p> <p>Show the field ONLY if:<br/>[return_num] = '2' or [return_num] = '3' or [return_num] = '4' or [return_num] = '5' or [return_num] = '6' or [return_num] = '7'</p> | Was a urine toxicology screen performed for this visit?                        | <p>yesno</p> <table border="1"> <tr> <td>1</td> <td>Yes</td> </tr> <tr> <td>0</td> <td>No</td> </tr> </table>                                                                                                                                                                                                                                                                                                                                                                                                                                                                                                                                                                                                                                                                                                                                                                                                                                                                                                                                                                                | 1 | Yes                  | 0         | No |                      |                                       |   |                      |                                    |   |                      |                              |   |                      |                          |   |                      |           |   |                      |         |   |                      |              |   |                      |           |    |                       |             |    |                       |           |    |                       |           |    |                       |       |     |                        |             |
| 1   | Yes                                                                                                                                                                                      |                                                                                |                                                                                                                                                                                                                                                                                                                                                                                                                                                                                                                                                                                                                                                                                                                                                                                                                                                                                                                                                                                                                                                                                              |   |                      |           |    |                      |                                       |   |                      |                                    |   |                      |                              |   |                      |                          |   |                      |           |   |                      |         |   |                      |              |   |                      |           |    |                       |             |    |                       |           |    |                       |           |    |                       |       |     |                        |             |
| 0   | No                                                                                                                                                                                       |                                                                                |                                                                                                                                                                                                                                                                                                                                                                                                                                                                                                                                                                                                                                                                                                                                                                                                                                                                                                                                                                                                                                                                                              |   |                      |           |    |                      |                                       |   |                      |                                    |   |                      |                              |   |                      |                          |   |                      |           |   |                      |         |   |                      |              |   |                      |           |    |                       |             |    |                       |           |    |                       |           |    |                       |       |     |                        |             |
| 986 | <p>return_utox_spec_2</p> <p>Show the field ONLY if:<br/>[return_utox_2] = '1'</p>                                                                                                       | Please select all drugs shown to be positive in the urine toxicology analysis: | <p>checkbox</p> <table border="1"> <tr> <td>1</td> <td>return_utox_spec_2_1</td> <td>Amphetami</td> </tr> <tr> <td>2</td> <td>return_utox_spec_2_2</td> <td>Barbiturates</td> </tr> <tr> <td>3</td> <td>return_utox_spec_2_3</td> <td>Cocaine</td> </tr> <tr> <td>4</td> <td>return_utox_spec_2_4</td> <td>Methaqualo</td> </tr> <tr> <td>5</td> <td>return_utox_spec_2_5</td> <td>Methadone</td> </tr> <tr> <td>6</td> <td>return_utox_spec_2_6</td> <td>Methamphe</td> </tr> <tr> <td>7</td> <td>return_utox_spec_2_7</td> <td>Opiates</td> </tr> <tr> <td>8</td> <td>return_utox_spec_2_8</td> <td>Phencyclidin</td> </tr> <tr> <td>9</td> <td>return_utox_spec_2_9</td> <td>Marijuana</td> </tr> <tr> <td>10</td> <td>return_utox_spec_2_10</td> <td>Benzodiazep</td> </tr> <tr> <td>11</td> <td>return_utox_spec_2_11</td> <td>Propoxyph</td> </tr> <tr> <td>12</td> <td>return_utox_spec_2_12</td> <td>Amphetami</td> </tr> <tr> <td>13</td> <td>return_utox_spec_2_13</td> <td>Other</td> </tr> <tr> <td>999</td> <td>return_utox_spec_2_999</td> <td>None of the</td> </tr> </table> | 1 | return_utox_spec_2_1 | Amphetami | 2  | return_utox_spec_2_2 | Barbiturates                          | 3 | return_utox_spec_2_3 | Cocaine                            | 4 | return_utox_spec_2_4 | Methaqualo                   | 5 | return_utox_spec_2_5 | Methadone                | 6 | return_utox_spec_2_6 | Methamphe | 7 | return_utox_spec_2_7 | Opiates | 8 | return_utox_spec_2_8 | Phencyclidin | 9 | return_utox_spec_2_9 | Marijuana | 10 | return_utox_spec_2_10 | Benzodiazep | 11 | return_utox_spec_2_11 | Propoxyph | 12 | return_utox_spec_2_12 | Amphetami | 13 | return_utox_spec_2_13 | Other | 999 | return_utox_spec_2_999 | None of the |
| 1   | return_utox_spec_2_1                                                                                                                                                                     | Amphetami                                                                      |                                                                                                                                                                                                                                                                                                                                                                                                                                                                                                                                                                                                                                                                                                                                                                                                                                                                                                                                                                                                                                                                                              |   |                      |           |    |                      |                                       |   |                      |                                    |   |                      |                              |   |                      |                          |   |                      |           |   |                      |         |   |                      |              |   |                      |           |    |                       |             |    |                       |           |    |                       |           |    |                       |       |     |                        |             |
| 2   | return_utox_spec_2_2                                                                                                                                                                     | Barbiturates                                                                   |                                                                                                                                                                                                                                                                                                                                                                                                                                                                                                                                                                                                                                                                                                                                                                                                                                                                                                                                                                                                                                                                                              |   |                      |           |    |                      |                                       |   |                      |                                    |   |                      |                              |   |                      |                          |   |                      |           |   |                      |         |   |                      |              |   |                      |           |    |                       |             |    |                       |           |    |                       |           |    |                       |       |     |                        |             |
| 3   | return_utox_spec_2_3                                                                                                                                                                     | Cocaine                                                                        |                                                                                                                                                                                                                                                                                                                                                                                                                                                                                                                                                                                                                                                                                                                                                                                                                                                                                                                                                                                                                                                                                              |   |                      |           |    |                      |                                       |   |                      |                                    |   |                      |                              |   |                      |                          |   |                      |           |   |                      |         |   |                      |              |   |                      |           |    |                       |             |    |                       |           |    |                       |           |    |                       |       |     |                        |             |
| 4   | return_utox_spec_2_4                                                                                                                                                                     | Methaqualo                                                                     |                                                                                                                                                                                                                                                                                                                                                                                                                                                                                                                                                                                                                                                                                                                                                                                                                                                                                                                                                                                                                                                                                              |   |                      |           |    |                      |                                       |   |                      |                                    |   |                      |                              |   |                      |                          |   |                      |           |   |                      |         |   |                      |              |   |                      |           |    |                       |             |    |                       |           |    |                       |           |    |                       |       |     |                        |             |
| 5   | return_utox_spec_2_5                                                                                                                                                                     | Methadone                                                                      |                                                                                                                                                                                                                                                                                                                                                                                                                                                                                                                                                                                                                                                                                                                                                                                                                                                                                                                                                                                                                                                                                              |   |                      |           |    |                      |                                       |   |                      |                                    |   |                      |                              |   |                      |                          |   |                      |           |   |                      |         |   |                      |              |   |                      |           |    |                       |             |    |                       |           |    |                       |           |    |                       |       |     |                        |             |
| 6   | return_utox_spec_2_6                                                                                                                                                                     | Methamphe                                                                      |                                                                                                                                                                                                                                                                                                                                                                                                                                                                                                                                                                                                                                                                                                                                                                                                                                                                                                                                                                                                                                                                                              |   |                      |           |    |                      |                                       |   |                      |                                    |   |                      |                              |   |                      |                          |   |                      |           |   |                      |         |   |                      |              |   |                      |           |    |                       |             |    |                       |           |    |                       |           |    |                       |       |     |                        |             |
| 7   | return_utox_spec_2_7                                                                                                                                                                     | Opiates                                                                        |                                                                                                                                                                                                                                                                                                                                                                                                                                                                                                                                                                                                                                                                                                                                                                                                                                                                                                                                                                                                                                                                                              |   |                      |           |    |                      |                                       |   |                      |                                    |   |                      |                              |   |                      |                          |   |                      |           |   |                      |         |   |                      |              |   |                      |           |    |                       |             |    |                       |           |    |                       |           |    |                       |       |     |                        |             |
| 8   | return_utox_spec_2_8                                                                                                                                                                     | Phencyclidin                                                                   |                                                                                                                                                                                                                                                                                                                                                                                                                                                                                                                                                                                                                                                                                                                                                                                                                                                                                                                                                                                                                                                                                              |   |                      |           |    |                      |                                       |   |                      |                                    |   |                      |                              |   |                      |                          |   |                      |           |   |                      |         |   |                      |              |   |                      |           |    |                       |             |    |                       |           |    |                       |           |    |                       |       |     |                        |             |
| 9   | return_utox_spec_2_9                                                                                                                                                                     | Marijuana                                                                      |                                                                                                                                                                                                                                                                                                                                                                                                                                                                                                                                                                                                                                                                                                                                                                                                                                                                                                                                                                                                                                                                                              |   |                      |           |    |                      |                                       |   |                      |                                    |   |                      |                              |   |                      |                          |   |                      |           |   |                      |         |   |                      |              |   |                      |           |    |                       |             |    |                       |           |    |                       |           |    |                       |       |     |                        |             |
| 10  | return_utox_spec_2_10                                                                                                                                                                    | Benzodiazep                                                                    |                                                                                                                                                                                                                                                                                                                                                                                                                                                                                                                                                                                                                                                                                                                                                                                                                                                                                                                                                                                                                                                                                              |   |                      |           |    |                      |                                       |   |                      |                                    |   |                      |                              |   |                      |                          |   |                      |           |   |                      |         |   |                      |              |   |                      |           |    |                       |             |    |                       |           |    |                       |           |    |                       |       |     |                        |             |
| 11  | return_utox_spec_2_11                                                                                                                                                                    | Propoxyph                                                                      |                                                                                                                                                                                                                                                                                                                                                                                                                                                                                                                                                                                                                                                                                                                                                                                                                                                                                                                                                                                                                                                                                              |   |                      |           |    |                      |                                       |   |                      |                                    |   |                      |                              |   |                      |                          |   |                      |           |   |                      |         |   |                      |              |   |                      |           |    |                       |             |    |                       |           |    |                       |           |    |                       |       |     |                        |             |
| 12  | return_utox_spec_2_12                                                                                                                                                                    | Amphetami                                                                      |                                                                                                                                                                                                                                                                                                                                                                                                                                                                                                                                                                                                                                                                                                                                                                                                                                                                                                                                                                                                                                                                                              |   |                      |           |    |                      |                                       |   |                      |                                    |   |                      |                              |   |                      |                          |   |                      |           |   |                      |         |   |                      |              |   |                      |           |    |                       |             |    |                       |           |    |                       |           |    |                       |       |     |                        |             |
| 13  | return_utox_spec_2_13                                                                                                                                                                    | Other                                                                          |                                                                                                                                                                                                                                                                                                                                                                                                                                                                                                                                                                                                                                                                                                                                                                                                                                                                                                                                                                                                                                                                                              |   |                      |           |    |                      |                                       |   |                      |                                    |   |                      |                              |   |                      |                          |   |                      |           |   |                      |         |   |                      |              |   |                      |           |    |                       |             |    |                       |           |    |                       |           |    |                       |       |     |                        |             |
| 999 | return_utox_spec_2_999                                                                                                                                                                   | None of the                                                                    |                                                                                                                                                                                                                                                                                                                                                                                                                                                                                                                                                                                                                                                                                                                                                                                                                                                                                                                                                                                                                                                                                              |   |                      |           |    |                      |                                       |   |                      |                                    |   |                      |                              |   |                      |                          |   |                      |           |   |                      |         |   |                      |              |   |                      |           |    |                       |             |    |                       |           |    |                       |           |    |                       |       |     |                        |             |

|     |                                                                                                                                                                                                   |                                                                                                                                                                                                                                                           |                                                                                                                                                                                                                                                                                                                                                                                                                                          |   |                     |         |    |                     |                                          |   |                     |                                         |   |                     |                   |
|-----|---------------------------------------------------------------------------------------------------------------------------------------------------------------------------------------------------|-----------------------------------------------------------------------------------------------------------------------------------------------------------------------------------------------------------------------------------------------------------|------------------------------------------------------------------------------------------------------------------------------------------------------------------------------------------------------------------------------------------------------------------------------------------------------------------------------------------------------------------------------------------------------------------------------------------|---|---------------------|---------|----|---------------------|------------------------------------------|---|---------------------|-----------------------------------------|---|---------------------|-------------------|
| 987 | <b>return_utox_oth_2</b><br><br><b>Show the field ONLY if:</b><br>[return_utox_spec_2(13)] = '1'                                                                                                  | <b>If "Other," please specify</b>                                                                                                                                                                                                                         | <b>text</b>                                                                                                                                                                                                                                                                                                                                                                                                                              |   |                     |         |    |                     |                                          |   |                     |                                         |   |                     |                   |
| 988 | <b>return_craving_2</b><br><br><b>Show the field ONLY if:</b><br>[return_num] = '2' or [return_num] = '3' or [return_num] = '4' or [return_num] = '5' or [return_num] = '6' or [return_num] = '7' | <b>Did the patient or provider mention opioid cravings during the visit?</b>                                                                                                                                                                              | <b>yesno</b><br><table border="1" data-bbox="1047 279 1138 373"> <tr> <td>1</td> <td>Yes</td> </tr> <tr> <td>0</td> <td>No</td> </tr> </table>                                                                                                                                                                                                                                                                                           | 1 | Yes                 | 0       | No |                     |                                          |   |                     |                                         |   |                     |                   |
| 1   | Yes                                                                                                                                                                                               |                                                                                                                                                                                                                                                           |                                                                                                                                                                                                                                                                                                                                                                                                                                          |   |                     |         |    |                     |                                          |   |                     |                                         |   |                     |                   |
| 0   | No                                                                                                                                                                                                |                                                                                                                                                                                                                                                           |                                                                                                                                                                                                                                                                                                                                                                                                                                          |   |                     |         |    |                     |                                          |   |                     |                                         |   |                     |                   |
| 989 | <b>return_wd_2</b><br><br><b>Show the field ONLY if:</b><br>[return_num] = '2' or [return_num] = '3' or [return_num] = '4' or [return_num] = '5' or [return_num] = '6' or [return_num] = '7'      | <b>Did the patient complain about or exhibit any signs or symptoms of withdrawal during this visit?</b><br><br><i>If the patient received buprenorphine during this visit, only select signs/symptoms documented BEFORE buprenorphine administration.</i> | <b>yesno</b><br><table border="1" data-bbox="1047 573 1138 667"> <tr> <td>1</td> <td>Yes</td> </tr> <tr> <td>0</td> <td>No</td> </tr> </table>                                                                                                                                                                                                                                                                                           | 1 | Yes                 | 0       | No |                     |                                          |   |                     |                                         |   |                     |                   |
| 1   | Yes                                                                                                                                                                                               |                                                                                                                                                                                                                                                           |                                                                                                                                                                                                                                                                                                                                                                                                                                          |   |                     |         |    |                     |                                          |   |                     |                                         |   |                     |                   |
| 0   | No                                                                                                                                                                                                |                                                                                                                                                                                                                                                           |                                                                                                                                                                                                                                                                                                                                                                                                                                          |   |                     |         |    |                     |                                          |   |                     |                                         |   |                     |                   |
| 990 | <b>return_sedation_2</b><br><br><b>Show the field ONLY if:</b><br>[return_wd_2] = '1'                                                                                                             | <b>Section Header: ReturnSedation2</b><br><br><b>Which of the following signs or symptoms of sedation were documented?</b>                                                                                                                                | <b>checkbox</b><br><table border="1" data-bbox="1047 856 1523 1243"> <tr> <td>1</td> <td>return_sedation_2_1</td> <td>Nodding</td> </tr> <tr> <td>2</td> <td>return_sedation_2_2</td> <td>Sleepy, drowsy, difficulty staying awake</td> </tr> <tr> <td>3</td> <td>return_sedation_2_3</td> <td>Feelings of general fatigue or weakness</td> </tr> <tr> <td>0</td> <td>return_sedation_2_0</td> <td>None of the above</td> </tr> </table> | 1 | return_sedation_2_1 | Nodding | 2  | return_sedation_2_2 | Sleepy, drowsy, difficulty staying awake | 3 | return_sedation_2_3 | Feelings of general fatigue or weakness | 0 | return_sedation_2_0 | None of the above |
| 1   | return_sedation_2_1                                                                                                                                                                               | Nodding                                                                                                                                                                                                                                                   |                                                                                                                                                                                                                                                                                                                                                                                                                                          |   |                     |         |    |                     |                                          |   |                     |                                         |   |                     |                   |
| 2   | return_sedation_2_2                                                                                                                                                                               | Sleepy, drowsy, difficulty staying awake                                                                                                                                                                                                                  |                                                                                                                                                                                                                                                                                                                                                                                                                                          |   |                     |         |    |                     |                                          |   |                     |                                         |   |                     |                   |
| 3   | return_sedation_2_3                                                                                                                                                                               | Feelings of general fatigue or weakness                                                                                                                                                                                                                   |                                                                                                                                                                                                                                                                                                                                                                                                                                          |   |                     |         |    |                     |                                          |   |                     |                                         |   |                     |                   |
| 0   | return_sedation_2_0                                                                                                                                                                               | None of the above                                                                                                                                                                                                                                         |                                                                                                                                                                                                                                                                                                                                                                                                                                          |   |                     |         |    |                     |                                          |   |                     |                                         |   |                     |                   |

|     |                                                                                             |                                                                                                                                             |                                                                                                                                                                                                                                                                                                                                                                                                                                                                                                                                                                                                                                                                                                                                                                                                                                                                                                                                                                                                                                          |   |                    |                                     |   |                    |                                       |   |                    |               |   |                    |                |   |                    |                   |   |                  |                   |   |                  |                     |   |                  |      |   |                  |          |    |                   |         |    |                   |                         |    |                   |                              |    |                   |                  |   |                  |                   |
|-----|---------------------------------------------------------------------------------------------|---------------------------------------------------------------------------------------------------------------------------------------------|------------------------------------------------------------------------------------------------------------------------------------------------------------------------------------------------------------------------------------------------------------------------------------------------------------------------------------------------------------------------------------------------------------------------------------------------------------------------------------------------------------------------------------------------------------------------------------------------------------------------------------------------------------------------------------------------------------------------------------------------------------------------------------------------------------------------------------------------------------------------------------------------------------------------------------------------------------------------------------------------------------------------------------------|---|--------------------|-------------------------------------|---|--------------------|---------------------------------------|---|--------------------|---------------|---|--------------------|----------------|---|--------------------|-------------------|---|------------------|-------------------|---|------------------|---------------------|---|------------------|------|---|------------------|----------|----|-------------------|---------|----|-------------------|-------------------------|----|-------------------|------------------------------|----|-------------------|------------------|---|------------------|-------------------|
| 991 | <b>return_intox_2</b><br><br><b>Show the field ONLY if:</b><br><b>[return_wd_2] = '1'</b>   | <b>Section Header:</b> <i>Return Intoxication 2</i><br><br><b>Which of the following signs or symptoms of intoxication were documented?</b> | <b>checkbox</b><br><table border="1"> <tr><td>1</td><td>return_intox_2_1</td><td>Good mood</td></tr> <tr><td>2</td><td>return_intox_2_2</td><td>Coasting (Spaced out)</td></tr> <tr><td>3</td><td>return_intox_2_3</td><td>Pleasant Sick</td></tr> <tr><td>4</td><td>return_intox_2_4</td><td>Drive (energy)</td></tr> <tr><td>5</td><td>return_intox_2_5</td><td>High</td></tr> <tr><td>6</td><td>return_intox_2_6</td><td>Drunken</td></tr> <tr><td>7</td><td>return_intox_2_7</td><td>Soapbox (talkative)</td></tr> <tr><td>8</td><td>return_intox_2_8</td><td>Rush</td></tr> <tr><td>9</td><td>return_intox_2_9</td><td>Friendly</td></tr> <tr><td>10</td><td>return_intox_2_10</td><td>Relaxed</td></tr> <tr><td>11</td><td>return_intox_2_11</td><td>Diffculty concentrating</td></tr> <tr><td>12</td><td>return_intox_2_12</td><td>Feeling lightheaded or dizzy</td></tr> <tr><td>13</td><td>return_intox_2_13</td><td>Feeling confused</td></tr> <tr><td>0</td><td>return_intox_2_0</td><td>None of the above</td></tr> </table> | 1 | return_intox_2_1   | Good mood                           | 2 | return_intox_2_2   | Coasting (Spaced out)                 | 3 | return_intox_2_3   | Pleasant Sick | 4 | return_intox_2_4   | Drive (energy) | 5 | return_intox_2_5   | High              | 6 | return_intox_2_6 | Drunken           | 7 | return_intox_2_7 | Soapbox (talkative) | 8 | return_intox_2_8 | Rush | 9 | return_intox_2_9 | Friendly | 10 | return_intox_2_10 | Relaxed | 11 | return_intox_2_11 | Diffculty concentrating | 12 | return_intox_2_12 | Feeling lightheaded or dizzy | 13 | return_intox_2_13 | Feeling confused | 0 | return_intox_2_0 | None of the above |
| 1   | return_intox_2_1                                                                            | Good mood                                                                                                                                   |                                                                                                                                                                                                                                                                                                                                                                                                                                                                                                                                                                                                                                                                                                                                                                                                                                                                                                                                                                                                                                          |   |                    |                                     |   |                    |                                       |   |                    |               |   |                    |                |   |                    |                   |   |                  |                   |   |                  |                     |   |                  |      |   |                  |          |    |                   |         |    |                   |                         |    |                   |                              |    |                   |                  |   |                  |                   |
| 2   | return_intox_2_2                                                                            | Coasting (Spaced out)                                                                                                                       |                                                                                                                                                                                                                                                                                                                                                                                                                                                                                                                                                                                                                                                                                                                                                                                                                                                                                                                                                                                                                                          |   |                    |                                     |   |                    |                                       |   |                    |               |   |                    |                |   |                    |                   |   |                  |                   |   |                  |                     |   |                  |      |   |                  |          |    |                   |         |    |                   |                         |    |                   |                              |    |                   |                  |   |                  |                   |
| 3   | return_intox_2_3                                                                            | Pleasant Sick                                                                                                                               |                                                                                                                                                                                                                                                                                                                                                                                                                                                                                                                                                                                                                                                                                                                                                                                                                                                                                                                                                                                                                                          |   |                    |                                     |   |                    |                                       |   |                    |               |   |                    |                |   |                    |                   |   |                  |                   |   |                  |                     |   |                  |      |   |                  |          |    |                   |         |    |                   |                         |    |                   |                              |    |                   |                  |   |                  |                   |
| 4   | return_intox_2_4                                                                            | Drive (energy)                                                                                                                              |                                                                                                                                                                                                                                                                                                                                                                                                                                                                                                                                                                                                                                                                                                                                                                                                                                                                                                                                                                                                                                          |   |                    |                                     |   |                    |                                       |   |                    |               |   |                    |                |   |                    |                   |   |                  |                   |   |                  |                     |   |                  |      |   |                  |          |    |                   |         |    |                   |                         |    |                   |                              |    |                   |                  |   |                  |                   |
| 5   | return_intox_2_5                                                                            | High                                                                                                                                        |                                                                                                                                                                                                                                                                                                                                                                                                                                                                                                                                                                                                                                                                                                                                                                                                                                                                                                                                                                                                                                          |   |                    |                                     |   |                    |                                       |   |                    |               |   |                    |                |   |                    |                   |   |                  |                   |   |                  |                     |   |                  |      |   |                  |          |    |                   |         |    |                   |                         |    |                   |                              |    |                   |                  |   |                  |                   |
| 6   | return_intox_2_6                                                                            | Drunken                                                                                                                                     |                                                                                                                                                                                                                                                                                                                                                                                                                                                                                                                                                                                                                                                                                                                                                                                                                                                                                                                                                                                                                                          |   |                    |                                     |   |                    |                                       |   |                    |               |   |                    |                |   |                    |                   |   |                  |                   |   |                  |                     |   |                  |      |   |                  |          |    |                   |         |    |                   |                         |    |                   |                              |    |                   |                  |   |                  |                   |
| 7   | return_intox_2_7                                                                            | Soapbox (talkative)                                                                                                                         |                                                                                                                                                                                                                                                                                                                                                                                                                                                                                                                                                                                                                                                                                                                                                                                                                                                                                                                                                                                                                                          |   |                    |                                     |   |                    |                                       |   |                    |               |   |                    |                |   |                    |                   |   |                  |                   |   |                  |                     |   |                  |      |   |                  |          |    |                   |         |    |                   |                         |    |                   |                              |    |                   |                  |   |                  |                   |
| 8   | return_intox_2_8                                                                            | Rush                                                                                                                                        |                                                                                                                                                                                                                                                                                                                                                                                                                                                                                                                                                                                                                                                                                                                                                                                                                                                                                                                                                                                                                                          |   |                    |                                     |   |                    |                                       |   |                    |               |   |                    |                |   |                    |                   |   |                  |                   |   |                  |                     |   |                  |      |   |                  |          |    |                   |         |    |                   |                         |    |                   |                              |    |                   |                  |   |                  |                   |
| 9   | return_intox_2_9                                                                            | Friendly                                                                                                                                    |                                                                                                                                                                                                                                                                                                                                                                                                                                                                                                                                                                                                                                                                                                                                                                                                                                                                                                                                                                                                                                          |   |                    |                                     |   |                    |                                       |   |                    |               |   |                    |                |   |                    |                   |   |                  |                   |   |                  |                     |   |                  |      |   |                  |          |    |                   |         |    |                   |                         |    |                   |                              |    |                   |                  |   |                  |                   |
| 10  | return_intox_2_10                                                                           | Relaxed                                                                                                                                     |                                                                                                                                                                                                                                                                                                                                                                                                                                                                                                                                                                                                                                                                                                                                                                                                                                                                                                                                                                                                                                          |   |                    |                                     |   |                    |                                       |   |                    |               |   |                    |                |   |                    |                   |   |                  |                   |   |                  |                     |   |                  |      |   |                  |          |    |                   |         |    |                   |                         |    |                   |                              |    |                   |                  |   |                  |                   |
| 11  | return_intox_2_11                                                                           | Diffculty concentrating                                                                                                                     |                                                                                                                                                                                                                                                                                                                                                                                                                                                                                                                                                                                                                                                                                                                                                                                                                                                                                                                                                                                                                                          |   |                    |                                     |   |                    |                                       |   |                    |               |   |                    |                |   |                    |                   |   |                  |                   |   |                  |                     |   |                  |      |   |                  |          |    |                   |         |    |                   |                         |    |                   |                              |    |                   |                  |   |                  |                   |
| 12  | return_intox_2_12                                                                           | Feeling lightheaded or dizzy                                                                                                                |                                                                                                                                                                                                                                                                                                                                                                                                                                                                                                                                                                                                                                                                                                                                                                                                                                                                                                                                                                                                                                          |   |                    |                                     |   |                    |                                       |   |                    |               |   |                    |                |   |                    |                   |   |                  |                   |   |                  |                     |   |                  |      |   |                  |          |    |                   |         |    |                   |                         |    |                   |                              |    |                   |                  |   |                  |                   |
| 13  | return_intox_2_13                                                                           | Feeling confused                                                                                                                            |                                                                                                                                                                                                                                                                                                                                                                                                                                                                                                                                                                                                                                                                                                                                                                                                                                                                                                                                                                                                                                          |   |                    |                                     |   |                    |                                       |   |                    |               |   |                    |                |   |                    |                   |   |                  |                   |   |                  |                     |   |                  |      |   |                  |          |    |                   |         |    |                   |                         |    |                   |                              |    |                   |                  |   |                  |                   |
| 0   | return_intox_2_0                                                                            | None of the above                                                                                                                           |                                                                                                                                                                                                                                                                                                                                                                                                                                                                                                                                                                                                                                                                                                                                                                                                                                                                                                                                                                                                                                          |   |                    |                                     |   |                    |                                       |   |                    |               |   |                    |                |   |                    |                   |   |                  |                   |   |                  |                     |   |                  |      |   |                  |          |    |                   |         |    |                   |                         |    |                   |                              |    |                   |                  |   |                  |                   |
| 992 | <b>return_gi_2</b><br><br><b>Show the field ONLY if:</b><br><b>[return_wd_2] = '1'</b>      | <b>Section Header:</b> <i>Return GI 2</i><br><br><b>Which of the following gastrointestinal signs or symptoms were documented?</b>          | <b>checkbox</b><br><table border="1"> <tr><td>1</td><td>return_gi_2_1</td><td>Constipation</td></tr> <tr><td>2</td><td>return_gi_2_2</td><td>Turning of stomach/cramping/abdo pain</td></tr> <tr><td>3</td><td>return_gi_2_3</td><td>Nausea</td></tr> <tr><td>4</td><td>return_gi_2_4</td><td>Vomiting</td></tr> <tr><td>5</td><td>return_gi_2_5</td><td>Diarrhea</td></tr> <tr><td>0</td><td>return_gi_2_0</td><td>None of the above</td></tr> </table>                                                                                                                                                                                                                                                                                                                                                                                                                                                                                                                                                                                 | 1 | return_gi_2_1      | Constipation                        | 2 | return_gi_2_2      | Turning of stomach/cramping/abdo pain | 3 | return_gi_2_3      | Nausea        | 4 | return_gi_2_4      | Vomiting       | 5 | return_gi_2_5      | Diarrhea          | 0 | return_gi_2_0    | None of the above |   |                  |                     |   |                  |      |   |                  |          |    |                   |         |    |                   |                         |    |                   |                              |    |                   |                  |   |                  |                   |
| 1   | return_gi_2_1                                                                               | Constipation                                                                                                                                |                                                                                                                                                                                                                                                                                                                                                                                                                                                                                                                                                                                                                                                                                                                                                                                                                                                                                                                                                                                                                                          |   |                    |                                     |   |                    |                                       |   |                    |               |   |                    |                |   |                    |                   |   |                  |                   |   |                  |                     |   |                  |      |   |                  |          |    |                   |         |    |                   |                         |    |                   |                              |    |                   |                  |   |                  |                   |
| 2   | return_gi_2_2                                                                               | Turning of stomach/cramping/abdo pain                                                                                                       |                                                                                                                                                                                                                                                                                                                                                                                                                                                                                                                                                                                                                                                                                                                                                                                                                                                                                                                                                                                                                                          |   |                    |                                     |   |                    |                                       |   |                    |               |   |                    |                |   |                    |                   |   |                  |                   |   |                  |                     |   |                  |      |   |                  |          |    |                   |         |    |                   |                         |    |                   |                              |    |                   |                  |   |                  |                   |
| 3   | return_gi_2_3                                                                               | Nausea                                                                                                                                      |                                                                                                                                                                                                                                                                                                                                                                                                                                                                                                                                                                                                                                                                                                                                                                                                                                                                                                                                                                                                                                          |   |                    |                                     |   |                    |                                       |   |                    |               |   |                    |                |   |                    |                   |   |                  |                   |   |                  |                     |   |                  |      |   |                  |          |    |                   |         |    |                   |                         |    |                   |                              |    |                   |                  |   |                  |                   |
| 4   | return_gi_2_4                                                                               | Vomiting                                                                                                                                    |                                                                                                                                                                                                                                                                                                                                                                                                                                                                                                                                                                                                                                                                                                                                                                                                                                                                                                                                                                                                                                          |   |                    |                                     |   |                    |                                       |   |                    |               |   |                    |                |   |                    |                   |   |                  |                   |   |                  |                     |   |                  |      |   |                  |          |    |                   |         |    |                   |                         |    |                   |                              |    |                   |                  |   |                  |                   |
| 5   | return_gi_2_5                                                                               | Diarrhea                                                                                                                                    |                                                                                                                                                                                                                                                                                                                                                                                                                                                                                                                                                                                                                                                                                                                                                                                                                                                                                                                                                                                                                                          |   |                    |                                     |   |                    |                                       |   |                    |               |   |                    |                |   |                    |                   |   |                  |                   |   |                  |                     |   |                  |      |   |                  |          |    |                   |         |    |                   |                         |    |                   |                              |    |                   |                  |   |                  |                   |
| 0   | return_gi_2_0                                                                               | None of the above                                                                                                                           |                                                                                                                                                                                                                                                                                                                                                                                                                                                                                                                                                                                                                                                                                                                                                                                                                                                                                                                                                                                                                                          |   |                    |                                     |   |                    |                                       |   |                    |               |   |                    |                |   |                    |                   |   |                  |                   |   |                  |                     |   |                  |      |   |                  |          |    |                   |         |    |                   |                         |    |                   |                              |    |                   |                  |   |                  |                   |
| 993 | <b>return_anxiety_2</b><br><br><b>Show the field ONLY if:</b><br><b>[return_wd_2] = '1'</b> | <b>Section Header:</b> <i>Return Anxiety 2</i><br><br><b>Which of the following signs or symptoms of anxiety were documented?</b>           | <b>checkbox</b><br><table border="1"> <tr><td>1</td><td>return_anxiety_2_1</td><td>Anxiety, irritability, or agitation</td></tr> <tr><td>2</td><td>return_anxiety_2_2</td><td>Nervousness</td></tr> <tr><td>3</td><td>return_anxiety_2_3</td><td>Tremor</td></tr> <tr><td>4</td><td>return_anxiety_2_4</td><td>Restlessness</td></tr> <tr><td>0</td><td>return_anxiety_2_0</td><td>None of the above</td></tr> </table>                                                                                                                                                                                                                                                                                                                                                                                                                                                                                                                                                                                                                  | 1 | return_anxiety_2_1 | Anxiety, irritability, or agitation | 2 | return_anxiety_2_2 | Nervousness                           | 3 | return_anxiety_2_3 | Tremor        | 4 | return_anxiety_2_4 | Restlessness   | 0 | return_anxiety_2_0 | None of the above |   |                  |                   |   |                  |                     |   |                  |      |   |                  |          |    |                   |         |    |                   |                         |    |                   |                              |    |                   |                  |   |                  |                   |
| 1   | return_anxiety_2_1                                                                          | Anxiety, irritability, or agitation                                                                                                         |                                                                                                                                                                                                                                                                                                                                                                                                                                                                                                                                                                                                                                                                                                                                                                                                                                                                                                                                                                                                                                          |   |                    |                                     |   |                    |                                       |   |                    |               |   |                    |                |   |                    |                   |   |                  |                   |   |                  |                     |   |                  |      |   |                  |          |    |                   |         |    |                   |                         |    |                   |                              |    |                   |                  |   |                  |                   |
| 2   | return_anxiety_2_2                                                                          | Nervousness                                                                                                                                 |                                                                                                                                                                                                                                                                                                                                                                                                                                                                                                                                                                                                                                                                                                                                                                                                                                                                                                                                                                                                                                          |   |                    |                                     |   |                    |                                       |   |                    |               |   |                    |                |   |                    |                   |   |                  |                   |   |                  |                     |   |                  |      |   |                  |          |    |                   |         |    |                   |                         |    |                   |                              |    |                   |                  |   |                  |                   |
| 3   | return_anxiety_2_3                                                                          | Tremor                                                                                                                                      |                                                                                                                                                                                                                                                                                                                                                                                                                                                                                                                                                                                                                                                                                                                                                                                                                                                                                                                                                                                                                                          |   |                    |                                     |   |                    |                                       |   |                    |               |   |                    |                |   |                    |                   |   |                  |                   |   |                  |                     |   |                  |      |   |                  |          |    |                   |         |    |                   |                         |    |                   |                              |    |                   |                  |   |                  |                   |
| 4   | return_anxiety_2_4                                                                          | Restlessness                                                                                                                                |                                                                                                                                                                                                                                                                                                                                                                                                                                                                                                                                                                                                                                                                                                                                                                                                                                                                                                                                                                                                                                          |   |                    |                                     |   |                    |                                       |   |                    |               |   |                    |                |   |                    |                   |   |                  |                   |   |                  |                     |   |                  |      |   |                  |          |    |                   |         |    |                   |                         |    |                   |                              |    |                   |                  |   |                  |                   |
| 0   | return_anxiety_2_0                                                                          | None of the above                                                                                                                           |                                                                                                                                                                                                                                                                                                                                                                                                                                                                                                                                                                                                                                                                                                                                                                                                                                                                                                                                                                                                                                          |   |                    |                                     |   |                    |                                       |   |                    |               |   |                    |                |   |                    |                   |   |                  |                   |   |                  |                     |   |                  |      |   |                  |          |    |                   |         |    |                   |                         |    |                   |                              |    |                   |                  |   |                  |                   |

|     |                                                                                                                                                                                     |                                                                                                                                                      |                                                                                                                                                                                                                                                                                                                                                                                                                                                                                                                                                                                                                                                                                                                                                                                                                            |   |                       |                          |   |                       |                                       |   |                       |             |   |                       |                        |   |                       |                                                    |   |                       |                                                   |   |                       |                                                      |   |                       |                   |
|-----|-------------------------------------------------------------------------------------------------------------------------------------------------------------------------------------|------------------------------------------------------------------------------------------------------------------------------------------------------|----------------------------------------------------------------------------------------------------------------------------------------------------------------------------------------------------------------------------------------------------------------------------------------------------------------------------------------------------------------------------------------------------------------------------------------------------------------------------------------------------------------------------------------------------------------------------------------------------------------------------------------------------------------------------------------------------------------------------------------------------------------------------------------------------------------------------|---|-----------------------|--------------------------|---|-----------------------|---------------------------------------|---|-----------------------|-------------|---|-----------------------|------------------------|---|-----------------------|----------------------------------------------------|---|-----------------------|---------------------------------------------------|---|-----------------------|------------------------------------------------------|---|-----------------------|-------------------|
| 994 | <b>return_withdrawal_2</b><br><br><b>Show the field ONLY if:</b><br><b>[return_wd_2] = '1'</b>                                                                                      | <b>Section Header:</b> <i>Return Withdrawal 2</i><br><br><b>Which of the following signs or symptoms of withdrawal were documented?</b>              | <b>checkbox</b><br><table border="1"> <tr> <td>1</td> <td>return_withdrawal_2_1</td> <td>Yawning</td> </tr> <tr> <td>2</td> <td>return_withdrawal_2_2</td> <td>Gooseflesh skin (chills/piloerection)</td> </tr> <tr> <td>3</td> <td>return_withdrawal_2_3</td> <td>Pulse &gt; 80</td> </tr> <tr> <td>4</td> <td>return_withdrawal_2_4</td> <td>Sweating (diaphoresis)</td> </tr> <tr> <td>5</td> <td>return_withdrawal_2_5</td> <td>Pupil size larger than normal (dilation/mydriasis)</td> </tr> <tr> <td>6</td> <td>return_withdrawal_2_6</td> <td>Bone, joint and body aches (arthralgias/myalgias)</td> </tr> <tr> <td>7</td> <td>return_withdrawal_2_7</td> <td>Runny nose or tearing (rhinorrhea or lacrimation)</td> </tr> <tr> <td>0</td> <td>return_withdrawal_2_0</td> <td>None of the above</td> </tr> </table> | 1 | return_withdrawal_2_1 | Yawning                  | 2 | return_withdrawal_2_2 | Gooseflesh skin (chills/piloerection) | 3 | return_withdrawal_2_3 | Pulse > 80  | 4 | return_withdrawal_2_4 | Sweating (diaphoresis) | 5 | return_withdrawal_2_5 | Pupil size larger than normal (dilation/mydriasis) | 6 | return_withdrawal_2_6 | Bone, joint and body aches (arthralgias/myalgias) | 7 | return_withdrawal_2_7 | Runny nose or tearing (rhinorrhea or lacrimation)    | 0 | return_withdrawal_2_0 | None of the above |
| 1   | return_withdrawal_2_1                                                                                                                                                               | Yawning                                                                                                                                              |                                                                                                                                                                                                                                                                                                                                                                                                                                                                                                                                                                                                                                                                                                                                                                                                                            |   |                       |                          |   |                       |                                       |   |                       |             |   |                       |                        |   |                       |                                                    |   |                       |                                                   |   |                       |                                                      |   |                       |                   |
| 2   | return_withdrawal_2_2                                                                                                                                                               | Gooseflesh skin (chills/piloerection)                                                                                                                |                                                                                                                                                                                                                                                                                                                                                                                                                                                                                                                                                                                                                                                                                                                                                                                                                            |   |                       |                          |   |                       |                                       |   |                       |             |   |                       |                        |   |                       |                                                    |   |                       |                                                   |   |                       |                                                      |   |                       |                   |
| 3   | return_withdrawal_2_3                                                                                                                                                               | Pulse > 80                                                                                                                                           |                                                                                                                                                                                                                                                                                                                                                                                                                                                                                                                                                                                                                                                                                                                                                                                                                            |   |                       |                          |   |                       |                                       |   |                       |             |   |                       |                        |   |                       |                                                    |   |                       |                                                   |   |                       |                                                      |   |                       |                   |
| 4   | return_withdrawal_2_4                                                                                                                                                               | Sweating (diaphoresis)                                                                                                                               |                                                                                                                                                                                                                                                                                                                                                                                                                                                                                                                                                                                                                                                                                                                                                                                                                            |   |                       |                          |   |                       |                                       |   |                       |             |   |                       |                        |   |                       |                                                    |   |                       |                                                   |   |                       |                                                      |   |                       |                   |
| 5   | return_withdrawal_2_5                                                                                                                                                               | Pupil size larger than normal (dilation/mydriasis)                                                                                                   |                                                                                                                                                                                                                                                                                                                                                                                                                                                                                                                                                                                                                                                                                                                                                                                                                            |   |                       |                          |   |                       |                                       |   |                       |             |   |                       |                        |   |                       |                                                    |   |                       |                                                   |   |                       |                                                      |   |                       |                   |
| 6   | return_withdrawal_2_6                                                                                                                                                               | Bone, joint and body aches (arthralgias/myalgias)                                                                                                    |                                                                                                                                                                                                                                                                                                                                                                                                                                                                                                                                                                                                                                                                                                                                                                                                                            |   |                       |                          |   |                       |                                       |   |                       |             |   |                       |                        |   |                       |                                                    |   |                       |                                                   |   |                       |                                                      |   |                       |                   |
| 7   | return_withdrawal_2_7                                                                                                                                                               | Runny nose or tearing (rhinorrhea or lacrimation)                                                                                                    |                                                                                                                                                                                                                                                                                                                                                                                                                                                                                                                                                                                                                                                                                                                                                                                                                            |   |                       |                          |   |                       |                                       |   |                       |             |   |                       |                        |   |                       |                                                    |   |                       |                                                   |   |                       |                                                      |   |                       |                   |
| 0   | return_withdrawal_2_0                                                                                                                                                               | None of the above                                                                                                                                    |                                                                                                                                                                                                                                                                                                                                                                                                                                                                                                                                                                                                                                                                                                                                                                                                                            |   |                       |                          |   |                       |                                       |   |                       |             |   |                       |                        |   |                       |                                                    |   |                       |                                                   |   |                       |                                                      |   |                       |                   |
| 995 | <b>return_vitals_2</b><br><br><b>Show the field ONLY if:</b><br><b>[return_wd_2] = '1'</b>                                                                                          | <b>Section Header:</b> <i>Return Abnormal Vitals 2</i><br><br><b>Which of the following abnormal vital signs were documented?</b>                    | <b>checkbox</b><br><table border="1"> <tr> <td>1</td> <td>return_vitals_2_1</td> <td>Hypoxia</td> </tr> <tr> <td>2</td> <td>return_vitals_2_2</td> <td>Hypercarbia</td> </tr> <tr> <td>3</td> <td>return_vitals_2_3</td> <td>Hypotension</td> </tr> <tr> <td>4</td> <td>return_vitals_2_4</td> <td>Bradycardia</td> </tr> <tr> <td>0</td> <td>return_vitals_2_0</td> <td>None of the above</td> </tr> </table>                                                                                                                                                                                                                                                                                                                                                                                                             | 1 | return_vitals_2_1     | Hypoxia                  | 2 | return_vitals_2_2     | Hypercarbia                           | 3 | return_vitals_2_3     | Hypotension | 4 | return_vitals_2_4     | Bradycardia            | 0 | return_vitals_2_0     | None of the above                                  |   |                       |                                                   |   |                       |                                                      |   |                       |                   |
| 1   | return_vitals_2_1                                                                                                                                                                   | Hypoxia                                                                                                                                              |                                                                                                                                                                                                                                                                                                                                                                                                                                                                                                                                                                                                                                                                                                                                                                                                                            |   |                       |                          |   |                       |                                       |   |                       |             |   |                       |                        |   |                       |                                                    |   |                       |                                                   |   |                       |                                                      |   |                       |                   |
| 2   | return_vitals_2_2                                                                                                                                                                   | Hypercarbia                                                                                                                                          |                                                                                                                                                                                                                                                                                                                                                                                                                                                                                                                                                                                                                                                                                                                                                                                                                            |   |                       |                          |   |                       |                                       |   |                       |             |   |                       |                        |   |                       |                                                    |   |                       |                                                   |   |                       |                                                      |   |                       |                   |
| 3   | return_vitals_2_3                                                                                                                                                                   | Hypotension                                                                                                                                          |                                                                                                                                                                                                                                                                                                                                                                                                                                                                                                                                                                                                                                                                                                                                                                                                                            |   |                       |                          |   |                       |                                       |   |                       |             |   |                       |                        |   |                       |                                                    |   |                       |                                                   |   |                       |                                                      |   |                       |                   |
| 4   | return_vitals_2_4                                                                                                                                                                   | Bradycardia                                                                                                                                          |                                                                                                                                                                                                                                                                                                                                                                                                                                                                                                                                                                                                                                                                                                                                                                                                                            |   |                       |                          |   |                       |                                       |   |                       |             |   |                       |                        |   |                       |                                                    |   |                       |                                                   |   |                       |                                                      |   |                       |                   |
| 0   | return_vitals_2_0                                                                                                                                                                   | None of the above                                                                                                                                    |                                                                                                                                                                                                                                                                                                                                                                                                                                                                                                                                                                                                                                                                                                                                                                                                                            |   |                       |                          |   |                       |                                       |   |                       |             |   |                       |                        |   |                       |                                                    |   |                       |                                                   |   |                       |                                                      |   |                       |                   |
| 996 | <b>return_misc_2</b><br><br><b>Show the field ONLY if:</b><br><b>[return_wd_2] = '1'</b>                                                                                            | <b>Section Header:</b> <i>Return Miscellaneous 2</i><br><br><b>Which of the following miscellaneous opioid related side effects were documented?</b> | <b>checkbox</b><br><table border="1"> <tr> <td>1</td> <td>return_misc_2_1</td> <td>Difficulty passing urine</td> </tr> <tr> <td>2</td> <td>return_misc_2_2</td> <td>Itchiness</td> </tr> <tr> <td>3</td> <td>return_misc_2_3</td> <td>Dry mouth</td> </tr> <tr> <td>4</td> <td>return_misc_2_4</td> <td>Headache</td> </tr> <tr> <td>5</td> <td>return_misc_2_5</td> <td>Unable to walk</td> </tr> <tr> <td>6</td> <td>return_misc_2_6</td> <td>Unable to discharge</td> </tr> <tr> <td>7</td> <td>return_misc_2_7</td> <td>Pupil size smaller than normal (constriction/miosis)</td> </tr> <tr> <td>0</td> <td>return_misc_2_0</td> <td>None of the above</td> </tr> </table>                                                                                                                                             | 1 | return_misc_2_1       | Difficulty passing urine | 2 | return_misc_2_2       | Itchiness                             | 3 | return_misc_2_3       | Dry mouth   | 4 | return_misc_2_4       | Headache               | 5 | return_misc_2_5       | Unable to walk                                     | 6 | return_misc_2_6       | Unable to discharge                               | 7 | return_misc_2_7       | Pupil size smaller than normal (constriction/miosis) | 0 | return_misc_2_0       | None of the above |
| 1   | return_misc_2_1                                                                                                                                                                     | Difficulty passing urine                                                                                                                             |                                                                                                                                                                                                                                                                                                                                                                                                                                                                                                                                                                                                                                                                                                                                                                                                                            |   |                       |                          |   |                       |                                       |   |                       |             |   |                       |                        |   |                       |                                                    |   |                       |                                                   |   |                       |                                                      |   |                       |                   |
| 2   | return_misc_2_2                                                                                                                                                                     | Itchiness                                                                                                                                            |                                                                                                                                                                                                                                                                                                                                                                                                                                                                                                                                                                                                                                                                                                                                                                                                                            |   |                       |                          |   |                       |                                       |   |                       |             |   |                       |                        |   |                       |                                                    |   |                       |                                                   |   |                       |                                                      |   |                       |                   |
| 3   | return_misc_2_3                                                                                                                                                                     | Dry mouth                                                                                                                                            |                                                                                                                                                                                                                                                                                                                                                                                                                                                                                                                                                                                                                                                                                                                                                                                                                            |   |                       |                          |   |                       |                                       |   |                       |             |   |                       |                        |   |                       |                                                    |   |                       |                                                   |   |                       |                                                      |   |                       |                   |
| 4   | return_misc_2_4                                                                                                                                                                     | Headache                                                                                                                                             |                                                                                                                                                                                                                                                                                                                                                                                                                                                                                                                                                                                                                                                                                                                                                                                                                            |   |                       |                          |   |                       |                                       |   |                       |             |   |                       |                        |   |                       |                                                    |   |                       |                                                   |   |                       |                                                      |   |                       |                   |
| 5   | return_misc_2_5                                                                                                                                                                     | Unable to walk                                                                                                                                       |                                                                                                                                                                                                                                                                                                                                                                                                                                                                                                                                                                                                                                                                                                                                                                                                                            |   |                       |                          |   |                       |                                       |   |                       |             |   |                       |                        |   |                       |                                                    |   |                       |                                                   |   |                       |                                                      |   |                       |                   |
| 6   | return_misc_2_6                                                                                                                                                                     | Unable to discharge                                                                                                                                  |                                                                                                                                                                                                                                                                                                                                                                                                                                                                                                                                                                                                                                                                                                                                                                                                                            |   |                       |                          |   |                       |                                       |   |                       |             |   |                       |                        |   |                       |                                                    |   |                       |                                                   |   |                       |                                                      |   |                       |                   |
| 7   | return_misc_2_7                                                                                                                                                                     | Pupil size smaller than normal (constriction/miosis)                                                                                                 |                                                                                                                                                                                                                                                                                                                                                                                                                                                                                                                                                                                                                                                                                                                                                                                                                            |   |                       |                          |   |                       |                                       |   |                       |             |   |                       |                        |   |                       |                                                    |   |                       |                                                   |   |                       |                                                      |   |                       |                   |
| 0   | return_misc_2_0                                                                                                                                                                     | None of the above                                                                                                                                    |                                                                                                                                                                                                                                                                                                                                                                                                                                                                                                                                                                                                                                                                                                                                                                                                                            |   |                       |                          |   |                       |                                       |   |                       |             |   |                       |                        |   |                       |                                                    |   |                       |                                                   |   |                       |                                                      |   |                       |                   |
| 997 | <b>datetime_return_3</b><br><br><b>Show the field ONLY if:</b><br><b>[return_num] = '3' or [return_num] = '4' or [return_num] = '5' or [return_num] = '6' or [return_num] = '7'</b> | <b>Section Header:</b> <i>Third Return Visit</i><br><br><b>Date and time of arrival</b>                                                              | <b>text (datetime_mdy)</b>                                                                                                                                                                                                                                                                                                                                                                                                                                                                                                                                                                                                                                                                                                                                                                                                 |   |                       |                          |   |                       |                                       |   |                       |             |   |                       |                        |   |                       |                                                    |   |                       |                                                   |   |                       |                                                      |   |                       |                   |

|      |                                                                                                                                                              |                                                                                                        |                                                                                                                                                                                                                                                                                                                                                                                                                                                                                 |
|------|--------------------------------------------------------------------------------------------------------------------------------------------------------------|--------------------------------------------------------------------------------------------------------|---------------------------------------------------------------------------------------------------------------------------------------------------------------------------------------------------------------------------------------------------------------------------------------------------------------------------------------------------------------------------------------------------------------------------------------------------------------------------------|
| 998  | return_redcap_3<br>Show the field ONLY if:<br>[return_num] = '3' or [return_num] = '4' or [return_num] = '5' or [return_num] = '6' or [return_num] = '7'     | Does this encounter coincide with an existing visit in REDCap?                                         | yesno<br>1 Yes<br>0 No                                                                                                                                                                                                                                                                                                                                                                                                                                                          |
| 999  | return_redcap_spec_3<br>Show the field ONLY if:<br>[return_redcap_3] = '1'                                                                                   | Please enter the visit number                                                                          | text                                                                                                                                                                                                                                                                                                                                                                                                                                                                            |
| 1000 | return_od_3<br>Show the field ONLY if:<br>[return_num] = '3' or [return_num] = '4' or [return_num] = '5' or [return_num] = '6' or [return_num] = '7'         | Did the patient present to the ED for opioid overdose?                                                 | yesno<br>1 Yes<br>0 No                                                                                                                                                                                                                                                                                                                                                                                                                                                          |
| 1001 | return_illicit_yn_3<br>Show the field ONLY if:<br>[return_num] = '3' or [return_num] = '4' or [return_num] = '5' or [return_num] = '6' or [return_num] = '7' | Did the patient or provider report any substance use between the index ED visit and this return visit? | yesno<br>1 Yes<br>0 No                                                                                                                                                                                                                                                                                                                                                                                                                                                          |
| 1002 | return_substance_3<br>Show the field ONLY if:<br>[return_illicit_yn_3] = '1'                                                                                 | Which substance(s) did the patient use?                                                                | checkbox<br>1 return_substance_3_1 Opioids (not including buprenorph<br>2 return_substance_3_2 Methamph<br>3 return_substance_3_3 Cocaine<br>4 return_substance_3_4 Cannabis<br>5 return_substance_3_5 Hallucinoge (including Ecstasy/MD<br>6 return_substance_3_6 LSD<br>7 return_substance_3_7 Benzodiaze<br>8 return_substance_3_8 Alcohol<br>9 return_substance_3_9 Tobacco<br>10 return_substance_3_10 Other stimu NOS<br>11 return_substance_3_11 Other (note heavy usage |
| 1003 | return_substance_oth_3<br>Show the field ONLY if:<br>[return_substance_3(11)] = '1'                                                                          | If "Other," please specify.                                                                            | 999 return_substance_3_999 None of the<br>text                                                                                                                                                                                                                                                                                                                                                                                                                                  |

|                                                                                                                                                                                |                                                                                       |                                                                                                                                                                                                                                                                                                                                                                                                                                                                                                                                                                                                                                                                                                                                                                                                                                                                                                                                                                                                                 |   |                      |           |    |                      |                                       |   |                      |                                    |   |                      |                              |   |                      |                          |   |                      |           |   |                      |         |   |                      |              |   |                      |           |    |                       |             |    |                       |           |    |                       |           |    |                       |       |
|--------------------------------------------------------------------------------------------------------------------------------------------------------------------------------|---------------------------------------------------------------------------------------|-----------------------------------------------------------------------------------------------------------------------------------------------------------------------------------------------------------------------------------------------------------------------------------------------------------------------------------------------------------------------------------------------------------------------------------------------------------------------------------------------------------------------------------------------------------------------------------------------------------------------------------------------------------------------------------------------------------------------------------------------------------------------------------------------------------------------------------------------------------------------------------------------------------------------------------------------------------------------------------------------------------------|---|----------------------|-----------|----|----------------------|---------------------------------------|---|----------------------|------------------------------------|---|----------------------|------------------------------|---|----------------------|--------------------------|---|----------------------|-----------|---|----------------------|---------|---|----------------------|--------------|---|----------------------|-----------|----|-----------------------|-------------|----|-----------------------|-----------|----|-----------------------|-----------|----|-----------------------|-------|
| <p><b>1004</b> return_opioid_3</p> <p>Show the field ONLY if:<br/>[return_substance_3(1)] = '1'</p>                                                                            | <p>Which opioid(s) did the patient use?</p>                                           | <p>checkbox</p> <table border="1"> <tr> <td>1</td> <td>return_opioid_3_1</td> <td>Heroin</td> </tr> <tr> <td>2</td> <td>return_opioid_3_2</td> <td>Oxycodone (OxyContin, Percocet, etc.)</td> </tr> <tr> <td>3</td> <td>return_opioid_3_3</td> <td>Hydrocodone (Norco, Vicodin, etc.)</td> </tr> <tr> <td>4</td> <td>return_opioid_3_4</td> <td>Fentanyl (Duragesic, Ionsys)</td> </tr> <tr> <td>5</td> <td>return_opioid_3_5</td> <td>Hydromorphone (Dilaudid)</td> </tr> <tr> <td>6</td> <td>return_opioid_3_6</td> <td>Morphine</td> </tr> <tr> <td>7</td> <td>return_opioid_3_7</td> <td>Other</td> </tr> </table>                                                                                                                                                                                                                                                                                                                                                                                          | 1 | return_opioid_3_1    | Heroin    | 2  | return_opioid_3_2    | Oxycodone (OxyContin, Percocet, etc.) | 3 | return_opioid_3_3    | Hydrocodone (Norco, Vicodin, etc.) | 4 | return_opioid_3_4    | Fentanyl (Duragesic, Ionsys) | 5 | return_opioid_3_5    | Hydromorphone (Dilaudid) | 6 | return_opioid_3_6    | Morphine  | 7 | return_opioid_3_7    | Other   |   |                      |              |   |                      |           |    |                       |             |    |                       |           |    |                       |           |    |                       |       |
| 1                                                                                                                                                                              | return_opioid_3_1                                                                     | Heroin                                                                                                                                                                                                                                                                                                                                                                                                                                                                                                                                                                                                                                                                                                                                                                                                                                                                                                                                                                                                          |   |                      |           |    |                      |                                       |   |                      |                                    |   |                      |                              |   |                      |                          |   |                      |           |   |                      |         |   |                      |              |   |                      |           |    |                       |             |    |                       |           |    |                       |           |    |                       |       |
| 2                                                                                                                                                                              | return_opioid_3_2                                                                     | Oxycodone (OxyContin, Percocet, etc.)                                                                                                                                                                                                                                                                                                                                                                                                                                                                                                                                                                                                                                                                                                                                                                                                                                                                                                                                                                           |   |                      |           |    |                      |                                       |   |                      |                                    |   |                      |                              |   |                      |                          |   |                      |           |   |                      |         |   |                      |              |   |                      |           |    |                       |             |    |                       |           |    |                       |           |    |                       |       |
| 3                                                                                                                                                                              | return_opioid_3_3                                                                     | Hydrocodone (Norco, Vicodin, etc.)                                                                                                                                                                                                                                                                                                                                                                                                                                                                                                                                                                                                                                                                                                                                                                                                                                                                                                                                                                              |   |                      |           |    |                      |                                       |   |                      |                                    |   |                      |                              |   |                      |                          |   |                      |           |   |                      |         |   |                      |              |   |                      |           |    |                       |             |    |                       |           |    |                       |           |    |                       |       |
| 4                                                                                                                                                                              | return_opioid_3_4                                                                     | Fentanyl (Duragesic, Ionsys)                                                                                                                                                                                                                                                                                                                                                                                                                                                                                                                                                                                                                                                                                                                                                                                                                                                                                                                                                                                    |   |                      |           |    |                      |                                       |   |                      |                                    |   |                      |                              |   |                      |                          |   |                      |           |   |                      |         |   |                      |              |   |                      |           |    |                       |             |    |                       |           |    |                       |           |    |                       |       |
| 5                                                                                                                                                                              | return_opioid_3_5                                                                     | Hydromorphone (Dilaudid)                                                                                                                                                                                                                                                                                                                                                                                                                                                                                                                                                                                                                                                                                                                                                                                                                                                                                                                                                                                        |   |                      |           |    |                      |                                       |   |                      |                                    |   |                      |                              |   |                      |                          |   |                      |           |   |                      |         |   |                      |              |   |                      |           |    |                       |             |    |                       |           |    |                       |           |    |                       |       |
| 6                                                                                                                                                                              | return_opioid_3_6                                                                     | Morphine                                                                                                                                                                                                                                                                                                                                                                                                                                                                                                                                                                                                                                                                                                                                                                                                                                                                                                                                                                                                        |   |                      |           |    |                      |                                       |   |                      |                                    |   |                      |                              |   |                      |                          |   |                      |           |   |                      |         |   |                      |              |   |                      |           |    |                       |             |    |                       |           |    |                       |           |    |                       |       |
| 7                                                                                                                                                                              | return_opioid_3_7                                                                     | Other                                                                                                                                                                                                                                                                                                                                                                                                                                                                                                                                                                                                                                                                                                                                                                                                                                                                                                                                                                                                           |   |                      |           |    |                      |                                       |   |                      |                                    |   |                      |                              |   |                      |                          |   |                      |           |   |                      |         |   |                      |              |   |                      |           |    |                       |             |    |                       |           |    |                       |           |    |                       |       |
| <p><b>1005</b> return_opioid_oth_3</p> <p>Show the field ONLY if:<br/>[return_opioid_3(7)] = '1'</p>                                                                           | <p>If "Other," please specify.</p>                                                    | <p>text</p>                                                                                                                                                                                                                                                                                                                                                                                                                                                                                                                                                                                                                                                                                                                                                                                                                                                                                                                                                                                                     |   |                      |           |    |                      |                                       |   |                      |                                    |   |                      |                              |   |                      |                          |   |                      |           |   |                      |         |   |                      |              |   |                      |           |    |                       |             |    |                       |           |    |                       |           |    |                       |       |
| <p><b>1006</b> return_utox_3</p> <p>Show the field ONLY if:<br/>[return_num] = '3' or [return_num] = '4' or [return_num] = '5' or [return_num] = '6' or [return_num] = '7'</p> | <p>Was a urine toxicology screen performed for this visit?</p>                        | <p>yesno</p> <table border="1"> <tr> <td>1</td> <td>Yes</td> </tr> <tr> <td>0</td> <td>No</td> </tr> </table>                                                                                                                                                                                                                                                                                                                                                                                                                                                                                                                                                                                                                                                                                                                                                                                                                                                                                                   | 1 | Yes                  | 0         | No |                      |                                       |   |                      |                                    |   |                      |                              |   |                      |                          |   |                      |           |   |                      |         |   |                      |              |   |                      |           |    |                       |             |    |                       |           |    |                       |           |    |                       |       |
| 1                                                                                                                                                                              | Yes                                                                                   |                                                                                                                                                                                                                                                                                                                                                                                                                                                                                                                                                                                                                                                                                                                                                                                                                                                                                                                                                                                                                 |   |                      |           |    |                      |                                       |   |                      |                                    |   |                      |                              |   |                      |                          |   |                      |           |   |                      |         |   |                      |              |   |                      |           |    |                       |             |    |                       |           |    |                       |           |    |                       |       |
| 0                                                                                                                                                                              | No                                                                                    |                                                                                                                                                                                                                                                                                                                                                                                                                                                                                                                                                                                                                                                                                                                                                                                                                                                                                                                                                                                                                 |   |                      |           |    |                      |                                       |   |                      |                                    |   |                      |                              |   |                      |                          |   |                      |           |   |                      |         |   |                      |              |   |                      |           |    |                       |             |    |                       |           |    |                       |           |    |                       |       |
| <p><b>1007</b> return_utox_spec_3</p> <p>Show the field ONLY if:<br/>[return_utox_3] = '1'</p>                                                                                 | <p>Please select all drugs shown to be positive in the urine toxicology analysis:</p> | <p>checkbox</p> <table border="1"> <tr> <td>1</td> <td>return_utox_spec_3_1</td> <td>Amphetami</td> </tr> <tr> <td>2</td> <td>return_utox_spec_3_2</td> <td>Barbiturates</td> </tr> <tr> <td>3</td> <td>return_utox_spec_3_3</td> <td>Cocaine</td> </tr> <tr> <td>4</td> <td>return_utox_spec_3_4</td> <td>Methaqualo</td> </tr> <tr> <td>5</td> <td>return_utox_spec_3_5</td> <td>Methadone</td> </tr> <tr> <td>6</td> <td>return_utox_spec_3_6</td> <td>Methamphe</td> </tr> <tr> <td>7</td> <td>return_utox_spec_3_7</td> <td>Opiates</td> </tr> <tr> <td>8</td> <td>return_utox_spec_3_8</td> <td>Phencyclidin</td> </tr> <tr> <td>9</td> <td>return_utox_spec_3_9</td> <td>Marijuana</td> </tr> <tr> <td>10</td> <td>return_utox_spec_3_10</td> <td>Benzodiazep</td> </tr> <tr> <td>11</td> <td>return_utox_spec_3_11</td> <td>Propoxyph</td> </tr> <tr> <td>12</td> <td>return_utox_spec_3_12</td> <td>Amphetami</td> </tr> <tr> <td>13</td> <td>return_utox_spec_3_13</td> <td>Other</td> </tr> </table> | 1 | return_utox_spec_3_1 | Amphetami | 2  | return_utox_spec_3_2 | Barbiturates                          | 3 | return_utox_spec_3_3 | Cocaine                            | 4 | return_utox_spec_3_4 | Methaqualo                   | 5 | return_utox_spec_3_5 | Methadone                | 6 | return_utox_spec_3_6 | Methamphe | 7 | return_utox_spec_3_7 | Opiates | 8 | return_utox_spec_3_8 | Phencyclidin | 9 | return_utox_spec_3_9 | Marijuana | 10 | return_utox_spec_3_10 | Benzodiazep | 11 | return_utox_spec_3_11 | Propoxyph | 12 | return_utox_spec_3_12 | Amphetami | 13 | return_utox_spec_3_13 | Other |
| 1                                                                                                                                                                              | return_utox_spec_3_1                                                                  | Amphetami                                                                                                                                                                                                                                                                                                                                                                                                                                                                                                                                                                                                                                                                                                                                                                                                                                                                                                                                                                                                       |   |                      |           |    |                      |                                       |   |                      |                                    |   |                      |                              |   |                      |                          |   |                      |           |   |                      |         |   |                      |              |   |                      |           |    |                       |             |    |                       |           |    |                       |           |    |                       |       |
| 2                                                                                                                                                                              | return_utox_spec_3_2                                                                  | Barbiturates                                                                                                                                                                                                                                                                                                                                                                                                                                                                                                                                                                                                                                                                                                                                                                                                                                                                                                                                                                                                    |   |                      |           |    |                      |                                       |   |                      |                                    |   |                      |                              |   |                      |                          |   |                      |           |   |                      |         |   |                      |              |   |                      |           |    |                       |             |    |                       |           |    |                       |           |    |                       |       |
| 3                                                                                                                                                                              | return_utox_spec_3_3                                                                  | Cocaine                                                                                                                                                                                                                                                                                                                                                                                                                                                                                                                                                                                                                                                                                                                                                                                                                                                                                                                                                                                                         |   |                      |           |    |                      |                                       |   |                      |                                    |   |                      |                              |   |                      |                          |   |                      |           |   |                      |         |   |                      |              |   |                      |           |    |                       |             |    |                       |           |    |                       |           |    |                       |       |
| 4                                                                                                                                                                              | return_utox_spec_3_4                                                                  | Methaqualo                                                                                                                                                                                                                                                                                                                                                                                                                                                                                                                                                                                                                                                                                                                                                                                                                                                                                                                                                                                                      |   |                      |           |    |                      |                                       |   |                      |                                    |   |                      |                              |   |                      |                          |   |                      |           |   |                      |         |   |                      |              |   |                      |           |    |                       |             |    |                       |           |    |                       |           |    |                       |       |
| 5                                                                                                                                                                              | return_utox_spec_3_5                                                                  | Methadone                                                                                                                                                                                                                                                                                                                                                                                                                                                                                                                                                                                                                                                                                                                                                                                                                                                                                                                                                                                                       |   |                      |           |    |                      |                                       |   |                      |                                    |   |                      |                              |   |                      |                          |   |                      |           |   |                      |         |   |                      |              |   |                      |           |    |                       |             |    |                       |           |    |                       |           |    |                       |       |
| 6                                                                                                                                                                              | return_utox_spec_3_6                                                                  | Methamphe                                                                                                                                                                                                                                                                                                                                                                                                                                                                                                                                                                                                                                                                                                                                                                                                                                                                                                                                                                                                       |   |                      |           |    |                      |                                       |   |                      |                                    |   |                      |                              |   |                      |                          |   |                      |           |   |                      |         |   |                      |              |   |                      |           |    |                       |             |    |                       |           |    |                       |           |    |                       |       |
| 7                                                                                                                                                                              | return_utox_spec_3_7                                                                  | Opiates                                                                                                                                                                                                                                                                                                                                                                                                                                                                                                                                                                                                                                                                                                                                                                                                                                                                                                                                                                                                         |   |                      |           |    |                      |                                       |   |                      |                                    |   |                      |                              |   |                      |                          |   |                      |           |   |                      |         |   |                      |              |   |                      |           |    |                       |             |    |                       |           |    |                       |           |    |                       |       |
| 8                                                                                                                                                                              | return_utox_spec_3_8                                                                  | Phencyclidin                                                                                                                                                                                                                                                                                                                                                                                                                                                                                                                                                                                                                                                                                                                                                                                                                                                                                                                                                                                                    |   |                      |           |    |                      |                                       |   |                      |                                    |   |                      |                              |   |                      |                          |   |                      |           |   |                      |         |   |                      |              |   |                      |           |    |                       |             |    |                       |           |    |                       |           |    |                       |       |
| 9                                                                                                                                                                              | return_utox_spec_3_9                                                                  | Marijuana                                                                                                                                                                                                                                                                                                                                                                                                                                                                                                                                                                                                                                                                                                                                                                                                                                                                                                                                                                                                       |   |                      |           |    |                      |                                       |   |                      |                                    |   |                      |                              |   |                      |                          |   |                      |           |   |                      |         |   |                      |              |   |                      |           |    |                       |             |    |                       |           |    |                       |           |    |                       |       |
| 10                                                                                                                                                                             | return_utox_spec_3_10                                                                 | Benzodiazep                                                                                                                                                                                                                                                                                                                                                                                                                                                                                                                                                                                                                                                                                                                                                                                                                                                                                                                                                                                                     |   |                      |           |    |                      |                                       |   |                      |                                    |   |                      |                              |   |                      |                          |   |                      |           |   |                      |         |   |                      |              |   |                      |           |    |                       |             |    |                       |           |    |                       |           |    |                       |       |
| 11                                                                                                                                                                             | return_utox_spec_3_11                                                                 | Propoxyph                                                                                                                                                                                                                                                                                                                                                                                                                                                                                                                                                                                                                                                                                                                                                                                                                                                                                                                                                                                                       |   |                      |           |    |                      |                                       |   |                      |                                    |   |                      |                              |   |                      |                          |   |                      |           |   |                      |         |   |                      |              |   |                      |           |    |                       |             |    |                       |           |    |                       |           |    |                       |       |
| 12                                                                                                                                                                             | return_utox_spec_3_12                                                                 | Amphetami                                                                                                                                                                                                                                                                                                                                                                                                                                                                                                                                                                                                                                                                                                                                                                                                                                                                                                                                                                                                       |   |                      |           |    |                      |                                       |   |                      |                                    |   |                      |                              |   |                      |                          |   |                      |           |   |                      |         |   |                      |              |   |                      |           |    |                       |             |    |                       |           |    |                       |           |    |                       |       |
| 13                                                                                                                                                                             | return_utox_spec_3_13                                                                 | Other                                                                                                                                                                                                                                                                                                                                                                                                                                                                                                                                                                                                                                                                                                                                                                                                                                                                                                                                                                                                           |   |                      |           |    |                      |                                       |   |                      |                                    |   |                      |                              |   |                      |                          |   |                      |           |   |                      |         |   |                      |              |   |                      |           |    |                       |             |    |                       |           |    |                       |           |    |                       |       |
| <p><b>1008</b> return_utox_oth_3</p> <p>Show the field ONLY if:<br/>[return_utox_spec_3(13)] = '1'</p>                                                                         | <p>If "Other," please specify</p>                                                     | <p>999 return_utox_spec_3_999 None of the</p> <p>text</p>                                                                                                                                                                                                                                                                                                                                                                                                                                                                                                                                                                                                                                                                                                                                                                                                                                                                                                                                                       |   |                      |           |    |                      |                                       |   |                      |                                    |   |                      |                              |   |                      |                          |   |                      |           |   |                      |         |   |                      |              |   |                      |           |    |                       |             |    |                       |           |    |                       |           |    |                       |       |

|      |                                                                                                                                                                             |                                                                                                                                                                                                                                                            |                                                                                                                                                                                                                                                                                                                                                                                                                                                                                                                                                                                                                                                                                                                                                                                                                                                                                                                                                                                                                                                                                                                                   |   |                     |           |    |                     |                                          |   |                     |                                         |   |                     |                   |   |                  |      |   |                  |         |   |                  |                     |   |                  |      |   |                  |          |    |                   |         |    |                   |                          |    |                   |                              |    |                   |                  |   |                  |                   |
|------|-----------------------------------------------------------------------------------------------------------------------------------------------------------------------------|------------------------------------------------------------------------------------------------------------------------------------------------------------------------------------------------------------------------------------------------------------|-----------------------------------------------------------------------------------------------------------------------------------------------------------------------------------------------------------------------------------------------------------------------------------------------------------------------------------------------------------------------------------------------------------------------------------------------------------------------------------------------------------------------------------------------------------------------------------------------------------------------------------------------------------------------------------------------------------------------------------------------------------------------------------------------------------------------------------------------------------------------------------------------------------------------------------------------------------------------------------------------------------------------------------------------------------------------------------------------------------------------------------|---|---------------------|-----------|----|---------------------|------------------------------------------|---|---------------------|-----------------------------------------|---|---------------------|-------------------|---|------------------|------|---|------------------|---------|---|------------------|---------------------|---|------------------|------|---|------------------|----------|----|-------------------|---------|----|-------------------|--------------------------|----|-------------------|------------------------------|----|-------------------|------------------|---|------------------|-------------------|
| 1009 | <b>return_craving_3</b><br><br><b>Show the field ONLY if:</b><br>[return_num] = '3' or [return_num] = '4' or [return_num] = '5' or [return_num] = '6' or [return_num] = '7' | <b>Did the patient or provider mention opioid cravings during the visit?</b>                                                                                                                                                                               | <b>yesno</b><br><table border="1" data-bbox="1052 100 1140 197"> <tr> <td>1</td> <td>Yes</td> </tr> <tr> <td>0</td> <td>No</td> </tr> </table>                                                                                                                                                                                                                                                                                                                                                                                                                                                                                                                                                                                                                                                                                                                                                                                                                                                                                                                                                                                    | 1 | Yes                 | 0         | No |                     |                                          |   |                     |                                         |   |                     |                   |   |                  |      |   |                  |         |   |                  |                     |   |                  |      |   |                  |          |    |                   |         |    |                   |                          |    |                   |                              |    |                   |                  |   |                  |                   |
| 1    | Yes                                                                                                                                                                         |                                                                                                                                                                                                                                                            |                                                                                                                                                                                                                                                                                                                                                                                                                                                                                                                                                                                                                                                                                                                                                                                                                                                                                                                                                                                                                                                                                                                                   |   |                     |           |    |                     |                                          |   |                     |                                         |   |                     |                   |   |                  |      |   |                  |         |   |                  |                     |   |                  |      |   |                  |          |    |                   |         |    |                   |                          |    |                   |                              |    |                   |                  |   |                  |                   |
| 0    | No                                                                                                                                                                          |                                                                                                                                                                                                                                                            |                                                                                                                                                                                                                                                                                                                                                                                                                                                                                                                                                                                                                                                                                                                                                                                                                                                                                                                                                                                                                                                                                                                                   |   |                     |           |    |                     |                                          |   |                     |                                         |   |                     |                   |   |                  |      |   |                  |         |   |                  |                     |   |                  |      |   |                  |          |    |                   |         |    |                   |                          |    |                   |                              |    |                   |                  |   |                  |                   |
| 1010 | <b>return_wd_3</b><br><br><b>Show the field ONLY if:</b><br>[return_num] = '3' or [return_num] = '4' or [return_num] = '5' or [return_num] = '6' or [return_num] = '7'      | <b>Did the patient complaint about or exhibit any signs or symptoms of withdrawal during this visit?</b><br><br><i>If the patient received buprenorphine during this visit, only select signs/symptoms documented BEFORE buprenorphine administration.</i> | <b>yesno</b><br><table border="1" data-bbox="1052 357 1140 453"> <tr> <td>1</td> <td>Yes</td> </tr> <tr> <td>0</td> <td>No</td> </tr> </table>                                                                                                                                                                                                                                                                                                                                                                                                                                                                                                                                                                                                                                                                                                                                                                                                                                                                                                                                                                                    | 1 | Yes                 | 0         | No |                     |                                          |   |                     |                                         |   |                     |                   |   |                  |      |   |                  |         |   |                  |                     |   |                  |      |   |                  |          |    |                   |         |    |                   |                          |    |                   |                              |    |                   |                  |   |                  |                   |
| 1    | Yes                                                                                                                                                                         |                                                                                                                                                                                                                                                            |                                                                                                                                                                                                                                                                                                                                                                                                                                                                                                                                                                                                                                                                                                                                                                                                                                                                                                                                                                                                                                                                                                                                   |   |                     |           |    |                     |                                          |   |                     |                                         |   |                     |                   |   |                  |      |   |                  |         |   |                  |                     |   |                  |      |   |                  |          |    |                   |         |    |                   |                          |    |                   |                              |    |                   |                  |   |                  |                   |
| 0    | No                                                                                                                                                                          |                                                                                                                                                                                                                                                            |                                                                                                                                                                                                                                                                                                                                                                                                                                                                                                                                                                                                                                                                                                                                                                                                                                                                                                                                                                                                                                                                                                                                   |   |                     |           |    |                     |                                          |   |                     |                                         |   |                     |                   |   |                  |      |   |                  |         |   |                  |                     |   |                  |      |   |                  |          |    |                   |         |    |                   |                          |    |                   |                              |    |                   |                  |   |                  |                   |
| 1011 | <b>return_sedation_3</b><br><br><b>Show the field ONLY if:</b><br>[return_wd_3] = '1'                                                                                       | <b>Section Header: Return Sedation 3</b><br><br><b>Which of the following signs or symptoms of sedation were documented?</b>                                                                                                                               | <b>checkbox</b><br><table border="1" data-bbox="1052 615 1528 999"> <tr> <td>1</td> <td>return_sedation_3_1</td> <td>Nodding</td> </tr> <tr> <td>2</td> <td>return_sedation_3_2</td> <td>Sleepy, drowsy, difficulty staying awake</td> </tr> <tr> <td>3</td> <td>return_sedation_3_3</td> <td>Feelings of general fatigue or weakness</td> </tr> <tr> <td>0</td> <td>return_sedation_3_0</td> <td>None of the above</td> </tr> </table>                                                                                                                                                                                                                                                                                                                                                                                                                                                                                                                                                                                                                                                                                           | 1 | return_sedation_3_1 | Nodding   | 2  | return_sedation_3_2 | Sleepy, drowsy, difficulty staying awake | 3 | return_sedation_3_3 | Feelings of general fatigue or weakness | 0 | return_sedation_3_0 | None of the above |   |                  |      |   |                  |         |   |                  |                     |   |                  |      |   |                  |          |    |                   |         |    |                   |                          |    |                   |                              |    |                   |                  |   |                  |                   |
| 1    | return_sedation_3_1                                                                                                                                                         | Nodding                                                                                                                                                                                                                                                    |                                                                                                                                                                                                                                                                                                                                                                                                                                                                                                                                                                                                                                                                                                                                                                                                                                                                                                                                                                                                                                                                                                                                   |   |                     |           |    |                     |                                          |   |                     |                                         |   |                     |                   |   |                  |      |   |                  |         |   |                  |                     |   |                  |      |   |                  |          |    |                   |         |    |                   |                          |    |                   |                              |    |                   |                  |   |                  |                   |
| 2    | return_sedation_3_2                                                                                                                                                         | Sleepy, drowsy, difficulty staying awake                                                                                                                                                                                                                   |                                                                                                                                                                                                                                                                                                                                                                                                                                                                                                                                                                                                                                                                                                                                                                                                                                                                                                                                                                                                                                                                                                                                   |   |                     |           |    |                     |                                          |   |                     |                                         |   |                     |                   |   |                  |      |   |                  |         |   |                  |                     |   |                  |      |   |                  |          |    |                   |         |    |                   |                          |    |                   |                              |    |                   |                  |   |                  |                   |
| 3    | return_sedation_3_3                                                                                                                                                         | Feelings of general fatigue or weakness                                                                                                                                                                                                                    |                                                                                                                                                                                                                                                                                                                                                                                                                                                                                                                                                                                                                                                                                                                                                                                                                                                                                                                                                                                                                                                                                                                                   |   |                     |           |    |                     |                                          |   |                     |                                         |   |                     |                   |   |                  |      |   |                  |         |   |                  |                     |   |                  |      |   |                  |          |    |                   |         |    |                   |                          |    |                   |                              |    |                   |                  |   |                  |                   |
| 0    | return_sedation_3_0                                                                                                                                                         | None of the above                                                                                                                                                                                                                                          |                                                                                                                                                                                                                                                                                                                                                                                                                                                                                                                                                                                                                                                                                                                                                                                                                                                                                                                                                                                                                                                                                                                                   |   |                     |           |    |                     |                                          |   |                     |                                         |   |                     |                   |   |                  |      |   |                  |         |   |                  |                     |   |                  |      |   |                  |          |    |                   |         |    |                   |                          |    |                   |                              |    |                   |                  |   |                  |                   |
| 1012 | <b>return_intox_3</b><br><br><b>Show the field ONLY if:</b><br>[return_wd_3] = '1'                                                                                          | <b>Section Header: Return Intoxication 3</b><br><br><b>Which of the following signs or symptoms of intoxication were documented?</b>                                                                                                                       | <b>checkbox</b><br><table border="1" data-bbox="1052 1050 1528 1944"> <tr> <td>1</td> <td>return_intox_3_1</td> <td>Good mood</td> </tr> <tr> <td>2</td> <td>return_intox_3_2</td> <td>Coasting (Spaced out)</td> </tr> <tr> <td>3</td> <td>return_intox_3_3</td> <td>Pleasant Sick</td> </tr> <tr> <td>4</td> <td>return_intox_3_4</td> <td>Drive (energy)</td> </tr> <tr> <td>5</td> <td>return_intox_3_5</td> <td>High</td> </tr> <tr> <td>6</td> <td>return_intox_3_6</td> <td>Drunken</td> </tr> <tr> <td>7</td> <td>return_intox_3_7</td> <td>Soapbox (talkative)</td> </tr> <tr> <td>8</td> <td>return_intox_3_8</td> <td>Rush</td> </tr> <tr> <td>9</td> <td>return_intox_3_9</td> <td>Friendly</td> </tr> <tr> <td>10</td> <td>return_intox_3_10</td> <td>Relaxed</td> </tr> <tr> <td>11</td> <td>return_intox_3_11</td> <td>Difficulty concentrating</td> </tr> <tr> <td>12</td> <td>return_intox_3_12</td> <td>Feeling lightheaded or dizzy</td> </tr> <tr> <td>13</td> <td>return_intox_3_13</td> <td>Feeling confused</td> </tr> <tr> <td>0</td> <td>return_intox_3_0</td> <td>None of the above</td> </tr> </table> | 1 | return_intox_3_1    | Good mood | 2  | return_intox_3_2    | Coasting (Spaced out)                    | 3 | return_intox_3_3    | Pleasant Sick                           | 4 | return_intox_3_4    | Drive (energy)    | 5 | return_intox_3_5 | High | 6 | return_intox_3_6 | Drunken | 7 | return_intox_3_7 | Soapbox (talkative) | 8 | return_intox_3_8 | Rush | 9 | return_intox_3_9 | Friendly | 10 | return_intox_3_10 | Relaxed | 11 | return_intox_3_11 | Difficulty concentrating | 12 | return_intox_3_12 | Feeling lightheaded or dizzy | 13 | return_intox_3_13 | Feeling confused | 0 | return_intox_3_0 | None of the above |
| 1    | return_intox_3_1                                                                                                                                                            | Good mood                                                                                                                                                                                                                                                  |                                                                                                                                                                                                                                                                                                                                                                                                                                                                                                                                                                                                                                                                                                                                                                                                                                                                                                                                                                                                                                                                                                                                   |   |                     |           |    |                     |                                          |   |                     |                                         |   |                     |                   |   |                  |      |   |                  |         |   |                  |                     |   |                  |      |   |                  |          |    |                   |         |    |                   |                          |    |                   |                              |    |                   |                  |   |                  |                   |
| 2    | return_intox_3_2                                                                                                                                                            | Coasting (Spaced out)                                                                                                                                                                                                                                      |                                                                                                                                                                                                                                                                                                                                                                                                                                                                                                                                                                                                                                                                                                                                                                                                                                                                                                                                                                                                                                                                                                                                   |   |                     |           |    |                     |                                          |   |                     |                                         |   |                     |                   |   |                  |      |   |                  |         |   |                  |                     |   |                  |      |   |                  |          |    |                   |         |    |                   |                          |    |                   |                              |    |                   |                  |   |                  |                   |
| 3    | return_intox_3_3                                                                                                                                                            | Pleasant Sick                                                                                                                                                                                                                                              |                                                                                                                                                                                                                                                                                                                                                                                                                                                                                                                                                                                                                                                                                                                                                                                                                                                                                                                                                                                                                                                                                                                                   |   |                     |           |    |                     |                                          |   |                     |                                         |   |                     |                   |   |                  |      |   |                  |         |   |                  |                     |   |                  |      |   |                  |          |    |                   |         |    |                   |                          |    |                   |                              |    |                   |                  |   |                  |                   |
| 4    | return_intox_3_4                                                                                                                                                            | Drive (energy)                                                                                                                                                                                                                                             |                                                                                                                                                                                                                                                                                                                                                                                                                                                                                                                                                                                                                                                                                                                                                                                                                                                                                                                                                                                                                                                                                                                                   |   |                     |           |    |                     |                                          |   |                     |                                         |   |                     |                   |   |                  |      |   |                  |         |   |                  |                     |   |                  |      |   |                  |          |    |                   |         |    |                   |                          |    |                   |                              |    |                   |                  |   |                  |                   |
| 5    | return_intox_3_5                                                                                                                                                            | High                                                                                                                                                                                                                                                       |                                                                                                                                                                                                                                                                                                                                                                                                                                                                                                                                                                                                                                                                                                                                                                                                                                                                                                                                                                                                                                                                                                                                   |   |                     |           |    |                     |                                          |   |                     |                                         |   |                     |                   |   |                  |      |   |                  |         |   |                  |                     |   |                  |      |   |                  |          |    |                   |         |    |                   |                          |    |                   |                              |    |                   |                  |   |                  |                   |
| 6    | return_intox_3_6                                                                                                                                                            | Drunken                                                                                                                                                                                                                                                    |                                                                                                                                                                                                                                                                                                                                                                                                                                                                                                                                                                                                                                                                                                                                                                                                                                                                                                                                                                                                                                                                                                                                   |   |                     |           |    |                     |                                          |   |                     |                                         |   |                     |                   |   |                  |      |   |                  |         |   |                  |                     |   |                  |      |   |                  |          |    |                   |         |    |                   |                          |    |                   |                              |    |                   |                  |   |                  |                   |
| 7    | return_intox_3_7                                                                                                                                                            | Soapbox (talkative)                                                                                                                                                                                                                                        |                                                                                                                                                                                                                                                                                                                                                                                                                                                                                                                                                                                                                                                                                                                                                                                                                                                                                                                                                                                                                                                                                                                                   |   |                     |           |    |                     |                                          |   |                     |                                         |   |                     |                   |   |                  |      |   |                  |         |   |                  |                     |   |                  |      |   |                  |          |    |                   |         |    |                   |                          |    |                   |                              |    |                   |                  |   |                  |                   |
| 8    | return_intox_3_8                                                                                                                                                            | Rush                                                                                                                                                                                                                                                       |                                                                                                                                                                                                                                                                                                                                                                                                                                                                                                                                                                                                                                                                                                                                                                                                                                                                                                                                                                                                                                                                                                                                   |   |                     |           |    |                     |                                          |   |                     |                                         |   |                     |                   |   |                  |      |   |                  |         |   |                  |                     |   |                  |      |   |                  |          |    |                   |         |    |                   |                          |    |                   |                              |    |                   |                  |   |                  |                   |
| 9    | return_intox_3_9                                                                                                                                                            | Friendly                                                                                                                                                                                                                                                   |                                                                                                                                                                                                                                                                                                                                                                                                                                                                                                                                                                                                                                                                                                                                                                                                                                                                                                                                                                                                                                                                                                                                   |   |                     |           |    |                     |                                          |   |                     |                                         |   |                     |                   |   |                  |      |   |                  |         |   |                  |                     |   |                  |      |   |                  |          |    |                   |         |    |                   |                          |    |                   |                              |    |                   |                  |   |                  |                   |
| 10   | return_intox_3_10                                                                                                                                                           | Relaxed                                                                                                                                                                                                                                                    |                                                                                                                                                                                                                                                                                                                                                                                                                                                                                                                                                                                                                                                                                                                                                                                                                                                                                                                                                                                                                                                                                                                                   |   |                     |           |    |                     |                                          |   |                     |                                         |   |                     |                   |   |                  |      |   |                  |         |   |                  |                     |   |                  |      |   |                  |          |    |                   |         |    |                   |                          |    |                   |                              |    |                   |                  |   |                  |                   |
| 11   | return_intox_3_11                                                                                                                                                           | Difficulty concentrating                                                                                                                                                                                                                                   |                                                                                                                                                                                                                                                                                                                                                                                                                                                                                                                                                                                                                                                                                                                                                                                                                                                                                                                                                                                                                                                                                                                                   |   |                     |           |    |                     |                                          |   |                     |                                         |   |                     |                   |   |                  |      |   |                  |         |   |                  |                     |   |                  |      |   |                  |          |    |                   |         |    |                   |                          |    |                   |                              |    |                   |                  |   |                  |                   |
| 12   | return_intox_3_12                                                                                                                                                           | Feeling lightheaded or dizzy                                                                                                                                                                                                                               |                                                                                                                                                                                                                                                                                                                                                                                                                                                                                                                                                                                                                                                                                                                                                                                                                                                                                                                                                                                                                                                                                                                                   |   |                     |           |    |                     |                                          |   |                     |                                         |   |                     |                   |   |                  |      |   |                  |         |   |                  |                     |   |                  |      |   |                  |          |    |                   |         |    |                   |                          |    |                   |                              |    |                   |                  |   |                  |                   |
| 13   | return_intox_3_13                                                                                                                                                           | Feeling confused                                                                                                                                                                                                                                           |                                                                                                                                                                                                                                                                                                                                                                                                                                                                                                                                                                                                                                                                                                                                                                                                                                                                                                                                                                                                                                                                                                                                   |   |                     |           |    |                     |                                          |   |                     |                                         |   |                     |                   |   |                  |      |   |                  |         |   |                  |                     |   |                  |      |   |                  |          |    |                   |         |    |                   |                          |    |                   |                              |    |                   |                  |   |                  |                   |
| 0    | return_intox_3_0                                                                                                                                                            | None of the above                                                                                                                                                                                                                                          |                                                                                                                                                                                                                                                                                                                                                                                                                                                                                                                                                                                                                                                                                                                                                                                                                                                                                                                                                                                                                                                                                                                                   |   |                     |           |    |                     |                                          |   |                     |                                         |   |                     |                   |   |                  |      |   |                  |         |   |                  |                     |   |                  |      |   |                  |          |    |                   |         |    |                   |                          |    |                   |                              |    |                   |                  |   |                  |                   |



|                                                                                               |                                                                                                                                                |                                                                                                                                                                                                                                                                                                                                                                                                                                                                                                                                                                                                                                                                                                                                                                                                         |   |                       |                                     |   |                       |                                       |   |                       |             |   |                       |                        |   |                       |                                           |   |                       |                                             |   |                       |                                                |   |                       |                 |
|-----------------------------------------------------------------------------------------------|------------------------------------------------------------------------------------------------------------------------------------------------|---------------------------------------------------------------------------------------------------------------------------------------------------------------------------------------------------------------------------------------------------------------------------------------------------------------------------------------------------------------------------------------------------------------------------------------------------------------------------------------------------------------------------------------------------------------------------------------------------------------------------------------------------------------------------------------------------------------------------------------------------------------------------------------------------------|---|-----------------------|-------------------------------------|---|-----------------------|---------------------------------------|---|-----------------------|-------------|---|-----------------------|------------------------|---|-----------------------|-------------------------------------------|---|-----------------------|---------------------------------------------|---|-----------------------|------------------------------------------------|---|-----------------------|-----------------|
| <p><b>1013</b> return_gi_3</p> <p>Show the field ONLY if:<br/>[return_wd_3] = '1'</p>         | <p><b>Section Header:</b> <i>Return GI 3</i></p> <p><b>Which of the following gastrointestinal signs or symptoms were documented?</b></p>      | <p><b>checkbox</b></p> <table border="1"> <tr> <td>1</td> <td>return_gi_3_1</td> <td>Constipation</td> </tr> <tr> <td>2</td> <td>return_gi_3_2</td> <td>Turning of stomach/cramping/abdo pain</td> </tr> <tr> <td>3</td> <td>return_gi_3_3</td> <td>Nausea</td> </tr> <tr> <td>4</td> <td>return_gi_3_4</td> <td>Vomiting</td> </tr> <tr> <td>5</td> <td>return_gi_3_5</td> <td>Diarrhea</td> </tr> <tr> <td>0</td> <td>return_gi_3_0</td> <td>None of the above</td> </tr> </table>                                                                                                                                                                                                                                                                                                                    | 1 | return_gi_3_1         | Constipation                        | 2 | return_gi_3_2         | Turning of stomach/cramping/abdo pain | 3 | return_gi_3_3         | Nausea      | 4 | return_gi_3_4         | Vomiting               | 5 | return_gi_3_5         | Diarrhea                                  | 0 | return_gi_3_0         | None of the above                           |   |                       |                                                |   |                       |                 |
| 1                                                                                             | return_gi_3_1                                                                                                                                  | Constipation                                                                                                                                                                                                                                                                                                                                                                                                                                                                                                                                                                                                                                                                                                                                                                                            |   |                       |                                     |   |                       |                                       |   |                       |             |   |                       |                        |   |                       |                                           |   |                       |                                             |   |                       |                                                |   |                       |                 |
| 2                                                                                             | return_gi_3_2                                                                                                                                  | Turning of stomach/cramping/abdo pain                                                                                                                                                                                                                                                                                                                                                                                                                                                                                                                                                                                                                                                                                                                                                                   |   |                       |                                     |   |                       |                                       |   |                       |             |   |                       |                        |   |                       |                                           |   |                       |                                             |   |                       |                                                |   |                       |                 |
| 3                                                                                             | return_gi_3_3                                                                                                                                  | Nausea                                                                                                                                                                                                                                                                                                                                                                                                                                                                                                                                                                                                                                                                                                                                                                                                  |   |                       |                                     |   |                       |                                       |   |                       |             |   |                       |                        |   |                       |                                           |   |                       |                                             |   |                       |                                                |   |                       |                 |
| 4                                                                                             | return_gi_3_4                                                                                                                                  | Vomiting                                                                                                                                                                                                                                                                                                                                                                                                                                                                                                                                                                                                                                                                                                                                                                                                |   |                       |                                     |   |                       |                                       |   |                       |             |   |                       |                        |   |                       |                                           |   |                       |                                             |   |                       |                                                |   |                       |                 |
| 5                                                                                             | return_gi_3_5                                                                                                                                  | Diarrhea                                                                                                                                                                                                                                                                                                                                                                                                                                                                                                                                                                                                                                                                                                                                                                                                |   |                       |                                     |   |                       |                                       |   |                       |             |   |                       |                        |   |                       |                                           |   |                       |                                             |   |                       |                                                |   |                       |                 |
| 0                                                                                             | return_gi_3_0                                                                                                                                  | None of the above                                                                                                                                                                                                                                                                                                                                                                                                                                                                                                                                                                                                                                                                                                                                                                                       |   |                       |                                     |   |                       |                                       |   |                       |             |   |                       |                        |   |                       |                                           |   |                       |                                             |   |                       |                                                |   |                       |                 |
| <p><b>1014</b> return_anxiety_3</p> <p>Show the field ONLY if:<br/>[return_wd_3] = '1'</p>    | <p><b>Section Header:</b> <i>Return Anxiety 3</i></p> <p><b>Which of the following signs or symptoms of anxiety were documented?</b></p>       | <p><b>checkbox</b></p> <table border="1"> <tr> <td>1</td> <td>return_anxiety_3_1</td> <td>Anxiety, irritability, or agitation</td> </tr> <tr> <td>2</td> <td>return_anxiety_3_2</td> <td>Nervousness</td> </tr> <tr> <td>3</td> <td>return_anxiety_3_3</td> <td>Tremor</td> </tr> <tr> <td>4</td> <td>return_anxiety_3_4</td> <td>Restlessness</td> </tr> <tr> <td>0</td> <td>return_anxiety_3_0</td> <td>None of the above</td> </tr> </table>                                                                                                                                                                                                                                                                                                                                                         | 1 | return_anxiety_3_1    | Anxiety, irritability, or agitation | 2 | return_anxiety_3_2    | Nervousness                           | 3 | return_anxiety_3_3    | Tremor      | 4 | return_anxiety_3_4    | Restlessness           | 0 | return_anxiety_3_0    | None of the above                         |   |                       |                                             |   |                       |                                                |   |                       |                 |
| 1                                                                                             | return_anxiety_3_1                                                                                                                             | Anxiety, irritability, or agitation                                                                                                                                                                                                                                                                                                                                                                                                                                                                                                                                                                                                                                                                                                                                                                     |   |                       |                                     |   |                       |                                       |   |                       |             |   |                       |                        |   |                       |                                           |   |                       |                                             |   |                       |                                                |   |                       |                 |
| 2                                                                                             | return_anxiety_3_2                                                                                                                             | Nervousness                                                                                                                                                                                                                                                                                                                                                                                                                                                                                                                                                                                                                                                                                                                                                                                             |   |                       |                                     |   |                       |                                       |   |                       |             |   |                       |                        |   |                       |                                           |   |                       |                                             |   |                       |                                                |   |                       |                 |
| 3                                                                                             | return_anxiety_3_3                                                                                                                             | Tremor                                                                                                                                                                                                                                                                                                                                                                                                                                                                                                                                                                                                                                                                                                                                                                                                  |   |                       |                                     |   |                       |                                       |   |                       |             |   |                       |                        |   |                       |                                           |   |                       |                                             |   |                       |                                                |   |                       |                 |
| 4                                                                                             | return_anxiety_3_4                                                                                                                             | Restlessness                                                                                                                                                                                                                                                                                                                                                                                                                                                                                                                                                                                                                                                                                                                                                                                            |   |                       |                                     |   |                       |                                       |   |                       |             |   |                       |                        |   |                       |                                           |   |                       |                                             |   |                       |                                                |   |                       |                 |
| 0                                                                                             | return_anxiety_3_0                                                                                                                             | None of the above                                                                                                                                                                                                                                                                                                                                                                                                                                                                                                                                                                                                                                                                                                                                                                                       |   |                       |                                     |   |                       |                                       |   |                       |             |   |                       |                        |   |                       |                                           |   |                       |                                             |   |                       |                                                |   |                       |                 |
| <p><b>1015</b> return_withdrawal_3</p> <p>Show the field ONLY if:<br/>[return_wd_3] = '1'</p> | <p><b>Section Header:</b> <i>Return Withdrawal 3</i></p> <p><b>Which of the following signs or symptoms of withdrawal were documented?</b></p> | <p><b>checkbox</b></p> <table border="1"> <tr> <td>1</td> <td>return_withdrawal_3_1</td> <td>Yawning</td> </tr> <tr> <td>2</td> <td>return_withdrawal_3_2</td> <td>Gooseflesh skin (chills/piloerecti</td> </tr> <tr> <td>3</td> <td>return_withdrawal_3_3</td> <td>Pulse &gt; 80</td> </tr> <tr> <td>4</td> <td>return_withdrawal_3_4</td> <td>Sweating (diaphoresis)</td> </tr> <tr> <td>5</td> <td>return_withdrawal_3_5</td> <td>Pupil size larger normal (dilation/mydria</td> </tr> <tr> <td>6</td> <td>return_withdrawal_3_6</td> <td>Bone, jointache body aches (arthralgias/mya</td> </tr> <tr> <td>7</td> <td>return_withdrawal_3_7</td> <td>Runny nose or tearing (rhinorr or lacrimation)</td> </tr> <tr> <td>0</td> <td>return_withdrawal_3_0</td> <td>None of the abo</td> </tr> </table> | 1 | return_withdrawal_3_1 | Yawning                             | 2 | return_withdrawal_3_2 | Gooseflesh skin (chills/piloerecti    | 3 | return_withdrawal_3_3 | Pulse > 80  | 4 | return_withdrawal_3_4 | Sweating (diaphoresis) | 5 | return_withdrawal_3_5 | Pupil size larger normal (dilation/mydria | 6 | return_withdrawal_3_6 | Bone, jointache body aches (arthralgias/mya | 7 | return_withdrawal_3_7 | Runny nose or tearing (rhinorr or lacrimation) | 0 | return_withdrawal_3_0 | None of the abo |
| 1                                                                                             | return_withdrawal_3_1                                                                                                                          | Yawning                                                                                                                                                                                                                                                                                                                                                                                                                                                                                                                                                                                                                                                                                                                                                                                                 |   |                       |                                     |   |                       |                                       |   |                       |             |   |                       |                        |   |                       |                                           |   |                       |                                             |   |                       |                                                |   |                       |                 |
| 2                                                                                             | return_withdrawal_3_2                                                                                                                          | Gooseflesh skin (chills/piloerecti                                                                                                                                                                                                                                                                                                                                                                                                                                                                                                                                                                                                                                                                                                                                                                      |   |                       |                                     |   |                       |                                       |   |                       |             |   |                       |                        |   |                       |                                           |   |                       |                                             |   |                       |                                                |   |                       |                 |
| 3                                                                                             | return_withdrawal_3_3                                                                                                                          | Pulse > 80                                                                                                                                                                                                                                                                                                                                                                                                                                                                                                                                                                                                                                                                                                                                                                                              |   |                       |                                     |   |                       |                                       |   |                       |             |   |                       |                        |   |                       |                                           |   |                       |                                             |   |                       |                                                |   |                       |                 |
| 4                                                                                             | return_withdrawal_3_4                                                                                                                          | Sweating (diaphoresis)                                                                                                                                                                                                                                                                                                                                                                                                                                                                                                                                                                                                                                                                                                                                                                                  |   |                       |                                     |   |                       |                                       |   |                       |             |   |                       |                        |   |                       |                                           |   |                       |                                             |   |                       |                                                |   |                       |                 |
| 5                                                                                             | return_withdrawal_3_5                                                                                                                          | Pupil size larger normal (dilation/mydria                                                                                                                                                                                                                                                                                                                                                                                                                                                                                                                                                                                                                                                                                                                                                               |   |                       |                                     |   |                       |                                       |   |                       |             |   |                       |                        |   |                       |                                           |   |                       |                                             |   |                       |                                                |   |                       |                 |
| 6                                                                                             | return_withdrawal_3_6                                                                                                                          | Bone, jointache body aches (arthralgias/mya                                                                                                                                                                                                                                                                                                                                                                                                                                                                                                                                                                                                                                                                                                                                                             |   |                       |                                     |   |                       |                                       |   |                       |             |   |                       |                        |   |                       |                                           |   |                       |                                             |   |                       |                                                |   |                       |                 |
| 7                                                                                             | return_withdrawal_3_7                                                                                                                          | Runny nose or tearing (rhinorr or lacrimation)                                                                                                                                                                                                                                                                                                                                                                                                                                                                                                                                                                                                                                                                                                                                                          |   |                       |                                     |   |                       |                                       |   |                       |             |   |                       |                        |   |                       |                                           |   |                       |                                             |   |                       |                                                |   |                       |                 |
| 0                                                                                             | return_withdrawal_3_0                                                                                                                          | None of the abo                                                                                                                                                                                                                                                                                                                                                                                                                                                                                                                                                                                                                                                                                                                                                                                         |   |                       |                                     |   |                       |                                       |   |                       |             |   |                       |                        |   |                       |                                           |   |                       |                                             |   |                       |                                                |   |                       |                 |
| <p><b>1016</b> return_vitals_3</p> <p>Show the field ONLY if:<br/>[return_wd_3] = '1'</p>     | <p><b>Section Header:</b> <i>Return Abnormal Vitals 3</i></p> <p><b>Which of the following abnormal vital signs were documented?</b></p>       | <p><b>checkbox</b></p> <table border="1"> <tr> <td>1</td> <td>return_vitals_3_1</td> <td>Hypoxia</td> </tr> <tr> <td>2</td> <td>return_vitals_3_2</td> <td>Hypercarbia</td> </tr> <tr> <td>3</td> <td>return_vitals_3_3</td> <td>Hypotension</td> </tr> <tr> <td>4</td> <td>return_vitals_3_4</td> <td>Bradycardia</td> </tr> <tr> <td>0</td> <td>return_vitals_3_0</td> <td>None of the above</td> </tr> </table>                                                                                                                                                                                                                                                                                                                                                                                      | 1 | return_vitals_3_1     | Hypoxia                             | 2 | return_vitals_3_2     | Hypercarbia                           | 3 | return_vitals_3_3     | Hypotension | 4 | return_vitals_3_4     | Bradycardia            | 0 | return_vitals_3_0     | None of the above                         |   |                       |                                             |   |                       |                                                |   |                       |                 |
| 1                                                                                             | return_vitals_3_1                                                                                                                              | Hypoxia                                                                                                                                                                                                                                                                                                                                                                                                                                                                                                                                                                                                                                                                                                                                                                                                 |   |                       |                                     |   |                       |                                       |   |                       |             |   |                       |                        |   |                       |                                           |   |                       |                                             |   |                       |                                                |   |                       |                 |
| 2                                                                                             | return_vitals_3_2                                                                                                                              | Hypercarbia                                                                                                                                                                                                                                                                                                                                                                                                                                                                                                                                                                                                                                                                                                                                                                                             |   |                       |                                     |   |                       |                                       |   |                       |             |   |                       |                        |   |                       |                                           |   |                       |                                             |   |                       |                                                |   |                       |                 |
| 3                                                                                             | return_vitals_3_3                                                                                                                              | Hypotension                                                                                                                                                                                                                                                                                                                                                                                                                                                                                                                                                                                                                                                                                                                                                                                             |   |                       |                                     |   |                       |                                       |   |                       |             |   |                       |                        |   |                       |                                           |   |                       |                                             |   |                       |                                                |   |                       |                 |
| 4                                                                                             | return_vitals_3_4                                                                                                                              | Bradycardia                                                                                                                                                                                                                                                                                                                                                                                                                                                                                                                                                                                                                                                                                                                                                                                             |   |                       |                                     |   |                       |                                       |   |                       |             |   |                       |                        |   |                       |                                           |   |                       |                                             |   |                       |                                                |   |                       |                 |
| 0                                                                                             | return_vitals_3_0                                                                                                                              | None of the above                                                                                                                                                                                                                                                                                                                                                                                                                                                                                                                                                                                                                                                                                                                                                                                       |   |                       |                                     |   |                       |                                       |   |                       |             |   |                       |                        |   |                       |                                           |   |                       |                                             |   |                       |                                                |   |                       |                 |

|      |                                                                                                                                                          |                                                                                                                                               |                                                                                                                                                                                                                                                                                                                                                                                                                                                                                                                                                                                                                                                                                                              |   |                 |                          |    |                 |           |   |                 |           |   |                 |          |   |                 |                |   |                 |                     |   |                 |                                                      |   |                 |                   |
|------|----------------------------------------------------------------------------------------------------------------------------------------------------------|-----------------------------------------------------------------------------------------------------------------------------------------------|--------------------------------------------------------------------------------------------------------------------------------------------------------------------------------------------------------------------------------------------------------------------------------------------------------------------------------------------------------------------------------------------------------------------------------------------------------------------------------------------------------------------------------------------------------------------------------------------------------------------------------------------------------------------------------------------------------------|---|-----------------|--------------------------|----|-----------------|-----------|---|-----------------|-----------|---|-----------------|----------|---|-----------------|----------------|---|-----------------|---------------------|---|-----------------|------------------------------------------------------|---|-----------------|-------------------|
| 1017 | <b>return_misc_3</b><br><br><b>Show the field ONLY if:</b><br>[return_wd_3] = '1'                                                                        | <b>Section Header: Return Miscellaneous 3</b><br><br><b>Which of the following miscellaneous opioid related side effects were documented?</b> | <b>checkbox</b><br><table border="1" data-bbox="1047 115 1534 588"> <tr> <td>1</td> <td>return_misc_3_1</td> <td>Difficulty passing urine</td> </tr> <tr> <td>2</td> <td>return_misc_3_2</td> <td>Itchiness</td> </tr> <tr> <td>3</td> <td>return_misc_3_3</td> <td>Dry mouth</td> </tr> <tr> <td>4</td> <td>return_misc_3_4</td> <td>Headache</td> </tr> <tr> <td>5</td> <td>return_misc_3_5</td> <td>Unable to walk</td> </tr> <tr> <td>6</td> <td>return_misc_3_6</td> <td>Unable to discharge</td> </tr> <tr> <td>7</td> <td>return_misc_3_7</td> <td>Pupil size smaller than normal (constriction/miosis)</td> </tr> <tr> <td>0</td> <td>return_misc_3_0</td> <td>None of the above</td> </tr> </table> | 1 | return_misc_3_1 | Difficulty passing urine | 2  | return_misc_3_2 | Itchiness | 3 | return_misc_3_3 | Dry mouth | 4 | return_misc_3_4 | Headache | 5 | return_misc_3_5 | Unable to walk | 6 | return_misc_3_6 | Unable to discharge | 7 | return_misc_3_7 | Pupil size smaller than normal (constriction/miosis) | 0 | return_misc_3_0 | None of the above |
| 1    | return_misc_3_1                                                                                                                                          | Difficulty passing urine                                                                                                                      |                                                                                                                                                                                                                                                                                                                                                                                                                                                                                                                                                                                                                                                                                                              |   |                 |                          |    |                 |           |   |                 |           |   |                 |          |   |                 |                |   |                 |                     |   |                 |                                                      |   |                 |                   |
| 2    | return_misc_3_2                                                                                                                                          | Itchiness                                                                                                                                     |                                                                                                                                                                                                                                                                                                                                                                                                                                                                                                                                                                                                                                                                                                              |   |                 |                          |    |                 |           |   |                 |           |   |                 |          |   |                 |                |   |                 |                     |   |                 |                                                      |   |                 |                   |
| 3    | return_misc_3_3                                                                                                                                          | Dry mouth                                                                                                                                     |                                                                                                                                                                                                                                                                                                                                                                                                                                                                                                                                                                                                                                                                                                              |   |                 |                          |    |                 |           |   |                 |           |   |                 |          |   |                 |                |   |                 |                     |   |                 |                                                      |   |                 |                   |
| 4    | return_misc_3_4                                                                                                                                          | Headache                                                                                                                                      |                                                                                                                                                                                                                                                                                                                                                                                                                                                                                                                                                                                                                                                                                                              |   |                 |                          |    |                 |           |   |                 |           |   |                 |          |   |                 |                |   |                 |                     |   |                 |                                                      |   |                 |                   |
| 5    | return_misc_3_5                                                                                                                                          | Unable to walk                                                                                                                                |                                                                                                                                                                                                                                                                                                                                                                                                                                                                                                                                                                                                                                                                                                              |   |                 |                          |    |                 |           |   |                 |           |   |                 |          |   |                 |                |   |                 |                     |   |                 |                                                      |   |                 |                   |
| 6    | return_misc_3_6                                                                                                                                          | Unable to discharge                                                                                                                           |                                                                                                                                                                                                                                                                                                                                                                                                                                                                                                                                                                                                                                                                                                              |   |                 |                          |    |                 |           |   |                 |           |   |                 |          |   |                 |                |   |                 |                     |   |                 |                                                      |   |                 |                   |
| 7    | return_misc_3_7                                                                                                                                          | Pupil size smaller than normal (constriction/miosis)                                                                                          |                                                                                                                                                                                                                                                                                                                                                                                                                                                                                                                                                                                                                                                                                                              |   |                 |                          |    |                 |           |   |                 |           |   |                 |          |   |                 |                |   |                 |                     |   |                 |                                                      |   |                 |                   |
| 0    | return_misc_3_0                                                                                                                                          | None of the above                                                                                                                             |                                                                                                                                                                                                                                                                                                                                                                                                                                                                                                                                                                                                                                                                                                              |   |                 |                          |    |                 |           |   |                 |           |   |                 |          |   |                 |                |   |                 |                     |   |                 |                                                      |   |                 |                   |
| 1018 | <b>datetime_return_4</b><br><br><b>Show the field ONLY if:</b><br>[return_num] = '4' or [return_num] = '5' or [return_num] = '6' or [return_num] = '7'   | <b>Section Header: Fourth Return Visit</b><br><br><b>Date and time of arrival</b>                                                             | <b>text (datetime_mdy)</b>                                                                                                                                                                                                                                                                                                                                                                                                                                                                                                                                                                                                                                                                                   |   |                 |                          |    |                 |           |   |                 |           |   |                 |          |   |                 |                |   |                 |                     |   |                 |                                                      |   |                 |                   |
| 1019 | <b>return_redcap_4</b><br><br><b>Show the field ONLY if:</b><br>[return_num] = '4' or [return_num] = '5' or [return_num] = '6' or [return_num] = '7'     | <b>Does this encounter coincide with an existing visit in REDCap?</b>                                                                         | <b>yesno</b><br><table border="1" data-bbox="1047 861 1144 955"> <tr> <td>1</td> <td>Yes</td> </tr> <tr> <td>0</td> <td>No</td> </tr> </table>                                                                                                                                                                                                                                                                                                                                                                                                                                                                                                                                                               | 1 | Yes             | 0                        | No |                 |           |   |                 |           |   |                 |          |   |                 |                |   |                 |                     |   |                 |                                                      |   |                 |                   |
| 1    | Yes                                                                                                                                                      |                                                                                                                                               |                                                                                                                                                                                                                                                                                                                                                                                                                                                                                                                                                                                                                                                                                                              |   |                 |                          |    |                 |           |   |                 |           |   |                 |          |   |                 |                |   |                 |                     |   |                 |                                                      |   |                 |                   |
| 0    | No                                                                                                                                                       |                                                                                                                                               |                                                                                                                                                                                                                                                                                                                                                                                                                                                                                                                                                                                                                                                                                                              |   |                 |                          |    |                 |           |   |                 |           |   |                 |          |   |                 |                |   |                 |                     |   |                 |                                                      |   |                 |                   |
| 1020 | <b>return_redcap_spec_4</b><br><br><b>Show the field ONLY if:</b><br>[return_redcap_4] = '1'                                                             | <b>Please enter the visit number</b>                                                                                                          | <b>text</b>                                                                                                                                                                                                                                                                                                                                                                                                                                                                                                                                                                                                                                                                                                  |   |                 |                          |    |                 |           |   |                 |           |   |                 |          |   |                 |                |   |                 |                     |   |                 |                                                      |   |                 |                   |
| 1021 | <b>return_od_4</b><br><br><b>Show the field ONLY if:</b><br>[return_num] = '4' or [return_num] = '5' or [return_num] = '6' or [return_num] = '7'         | <b>Did the patient present to the ED for opioid overdose?</b>                                                                                 | <b>yesno</b><br><table border="1" data-bbox="1047 1302 1144 1396"> <tr> <td>1</td> <td>Yes</td> </tr> <tr> <td>0</td> <td>No</td> </tr> </table>                                                                                                                                                                                                                                                                                                                                                                                                                                                                                                                                                             | 1 | Yes             | 0                        | No |                 |           |   |                 |           |   |                 |          |   |                 |                |   |                 |                     |   |                 |                                                      |   |                 |                   |
| 1    | Yes                                                                                                                                                      |                                                                                                                                               |                                                                                                                                                                                                                                                                                                                                                                                                                                                                                                                                                                                                                                                                                                              |   |                 |                          |    |                 |           |   |                 |           |   |                 |          |   |                 |                |   |                 |                     |   |                 |                                                      |   |                 |                   |
| 0    | No                                                                                                                                                       |                                                                                                                                               |                                                                                                                                                                                                                                                                                                                                                                                                                                                                                                                                                                                                                                                                                                              |   |                 |                          |    |                 |           |   |                 |           |   |                 |          |   |                 |                |   |                 |                     |   |                 |                                                      |   |                 |                   |
| 1022 | <b>return_illicit_yn_4</b><br><br><b>Show the field ONLY if:</b><br>[return_num] = '4' or [return_num] = '5' or [return_num] = '6' or [return_num] = '7' | <b>Did the patient or provider report any substance use between the index ED visit and this return visit?</b>                                 | <b>yesno</b><br><table border="1" data-bbox="1047 1533 1144 1627"> <tr> <td>1</td> <td>Yes</td> </tr> <tr> <td>0</td> <td>No</td> </tr> </table>                                                                                                                                                                                                                                                                                                                                                                                                                                                                                                                                                             | 1 | Yes             | 0                        | No |                 |           |   |                 |           |   |                 |          |   |                 |                |   |                 |                     |   |                 |                                                      |   |                 |                   |
| 1    | Yes                                                                                                                                                      |                                                                                                                                               |                                                                                                                                                                                                                                                                                                                                                                                                                                                                                                                                                                                                                                                                                                              |   |                 |                          |    |                 |           |   |                 |           |   |                 |          |   |                 |                |   |                 |                     |   |                 |                                                      |   |                 |                   |
| 0    | No                                                                                                                                                       |                                                                                                                                               |                                                                                                                                                                                                                                                                                                                                                                                                                                                                                                                                                                                                                                                                                                              |   |                 |                          |    |                 |           |   |                 |           |   |                 |          |   |                 |                |   |                 |                     |   |                 |                                                      |   |                 |                   |

|      |                                                                                                                                                    |                                                                |                                                                                                                                                                                                                                                                                                                                                                                                                                                                                                                                                                                                                                                                                                                                                                                                                                                                                                                                                                                                                                  |   |                      |                                   |    |                      |                                       |   |                      |                                    |   |                      |                              |   |                      |                                   |   |                      |          |   |                      |            |   |                      |         |   |                      |         |    |                       |                |    |                       |                         |     |                        |             |
|------|----------------------------------------------------------------------------------------------------------------------------------------------------|----------------------------------------------------------------|----------------------------------------------------------------------------------------------------------------------------------------------------------------------------------------------------------------------------------------------------------------------------------------------------------------------------------------------------------------------------------------------------------------------------------------------------------------------------------------------------------------------------------------------------------------------------------------------------------------------------------------------------------------------------------------------------------------------------------------------------------------------------------------------------------------------------------------------------------------------------------------------------------------------------------------------------------------------------------------------------------------------------------|---|----------------------|-----------------------------------|----|----------------------|---------------------------------------|---|----------------------|------------------------------------|---|----------------------|------------------------------|---|----------------------|-----------------------------------|---|----------------------|----------|---|----------------------|------------|---|----------------------|---------|---|----------------------|---------|----|-----------------------|----------------|----|-----------------------|-------------------------|-----|------------------------|-------------|
| 1023 | <b>return_substance_4</b><br><br><b>Show the field ONLY if:</b><br>[return_illicit_yn_4] = '1'                                                     | <b>Which substance(s) did the patient use?</b>                 | <b>checkbox</b><br><table border="1" data-bbox="1047 115 1528 884"> <tr> <td>1</td> <td>return_substance_4_1</td> <td>Opioids (not including buprenorph</td> </tr> <tr> <td>2</td> <td>return_substance_4_2</td> <td>Methamph</td> </tr> <tr> <td>3</td> <td>return_substance_4_3</td> <td>Cocaine</td> </tr> <tr> <td>4</td> <td>return_substance_4_4</td> <td>Cannabis</td> </tr> <tr> <td>5</td> <td>return_substance_4_5</td> <td>Hallucinoge (including Ecstasy/MD</td> </tr> <tr> <td>6</td> <td>return_substance_4_6</td> <td>LSD</td> </tr> <tr> <td>7</td> <td>return_substance_4_7</td> <td>Benzodiaze</td> </tr> <tr> <td>8</td> <td>return_substance_4_8</td> <td>Alcohol</td> </tr> <tr> <td>9</td> <td>return_substance_4_9</td> <td>Tobacco</td> </tr> <tr> <td>10</td> <td>return_substance_4_10</td> <td>Otherstimu NOS</td> </tr> <tr> <td>11</td> <td>return_substance_4_11</td> <td>Other (note heavy usage</td> </tr> <tr> <td>999</td> <td>return_substance_4_999</td> <td>None of the</td> </tr> </table> | 1 | return_substance_4_1 | Opioids (not including buprenorph | 2  | return_substance_4_2 | Methamph                              | 3 | return_substance_4_3 | Cocaine                            | 4 | return_substance_4_4 | Cannabis                     | 5 | return_substance_4_5 | Hallucinoge (including Ecstasy/MD | 6 | return_substance_4_6 | LSD      | 7 | return_substance_4_7 | Benzodiaze | 8 | return_substance_4_8 | Alcohol | 9 | return_substance_4_9 | Tobacco | 10 | return_substance_4_10 | Otherstimu NOS | 11 | return_substance_4_11 | Other (note heavy usage | 999 | return_substance_4_999 | None of the |
| 1    | return_substance_4_1                                                                                                                               | Opioids (not including buprenorph                              |                                                                                                                                                                                                                                                                                                                                                                                                                                                                                                                                                                                                                                                                                                                                                                                                                                                                                                                                                                                                                                  |   |                      |                                   |    |                      |                                       |   |                      |                                    |   |                      |                              |   |                      |                                   |   |                      |          |   |                      |            |   |                      |         |   |                      |         |    |                       |                |    |                       |                         |     |                        |             |
| 2    | return_substance_4_2                                                                                                                               | Methamph                                                       |                                                                                                                                                                                                                                                                                                                                                                                                                                                                                                                                                                                                                                                                                                                                                                                                                                                                                                                                                                                                                                  |   |                      |                                   |    |                      |                                       |   |                      |                                    |   |                      |                              |   |                      |                                   |   |                      |          |   |                      |            |   |                      |         |   |                      |         |    |                       |                |    |                       |                         |     |                        |             |
| 3    | return_substance_4_3                                                                                                                               | Cocaine                                                        |                                                                                                                                                                                                                                                                                                                                                                                                                                                                                                                                                                                                                                                                                                                                                                                                                                                                                                                                                                                                                                  |   |                      |                                   |    |                      |                                       |   |                      |                                    |   |                      |                              |   |                      |                                   |   |                      |          |   |                      |            |   |                      |         |   |                      |         |    |                       |                |    |                       |                         |     |                        |             |
| 4    | return_substance_4_4                                                                                                                               | Cannabis                                                       |                                                                                                                                                                                                                                                                                                                                                                                                                                                                                                                                                                                                                                                                                                                                                                                                                                                                                                                                                                                                                                  |   |                      |                                   |    |                      |                                       |   |                      |                                    |   |                      |                              |   |                      |                                   |   |                      |          |   |                      |            |   |                      |         |   |                      |         |    |                       |                |    |                       |                         |     |                        |             |
| 5    | return_substance_4_5                                                                                                                               | Hallucinoge (including Ecstasy/MD                              |                                                                                                                                                                                                                                                                                                                                                                                                                                                                                                                                                                                                                                                                                                                                                                                                                                                                                                                                                                                                                                  |   |                      |                                   |    |                      |                                       |   |                      |                                    |   |                      |                              |   |                      |                                   |   |                      |          |   |                      |            |   |                      |         |   |                      |         |    |                       |                |    |                       |                         |     |                        |             |
| 6    | return_substance_4_6                                                                                                                               | LSD                                                            |                                                                                                                                                                                                                                                                                                                                                                                                                                                                                                                                                                                                                                                                                                                                                                                                                                                                                                                                                                                                                                  |   |                      |                                   |    |                      |                                       |   |                      |                                    |   |                      |                              |   |                      |                                   |   |                      |          |   |                      |            |   |                      |         |   |                      |         |    |                       |                |    |                       |                         |     |                        |             |
| 7    | return_substance_4_7                                                                                                                               | Benzodiaze                                                     |                                                                                                                                                                                                                                                                                                                                                                                                                                                                                                                                                                                                                                                                                                                                                                                                                                                                                                                                                                                                                                  |   |                      |                                   |    |                      |                                       |   |                      |                                    |   |                      |                              |   |                      |                                   |   |                      |          |   |                      |            |   |                      |         |   |                      |         |    |                       |                |    |                       |                         |     |                        |             |
| 8    | return_substance_4_8                                                                                                                               | Alcohol                                                        |                                                                                                                                                                                                                                                                                                                                                                                                                                                                                                                                                                                                                                                                                                                                                                                                                                                                                                                                                                                                                                  |   |                      |                                   |    |                      |                                       |   |                      |                                    |   |                      |                              |   |                      |                                   |   |                      |          |   |                      |            |   |                      |         |   |                      |         |    |                       |                |    |                       |                         |     |                        |             |
| 9    | return_substance_4_9                                                                                                                               | Tobacco                                                        |                                                                                                                                                                                                                                                                                                                                                                                                                                                                                                                                                                                                                                                                                                                                                                                                                                                                                                                                                                                                                                  |   |                      |                                   |    |                      |                                       |   |                      |                                    |   |                      |                              |   |                      |                                   |   |                      |          |   |                      |            |   |                      |         |   |                      |         |    |                       |                |    |                       |                         |     |                        |             |
| 10   | return_substance_4_10                                                                                                                              | Otherstimu NOS                                                 |                                                                                                                                                                                                                                                                                                                                                                                                                                                                                                                                                                                                                                                                                                                                                                                                                                                                                                                                                                                                                                  |   |                      |                                   |    |                      |                                       |   |                      |                                    |   |                      |                              |   |                      |                                   |   |                      |          |   |                      |            |   |                      |         |   |                      |         |    |                       |                |    |                       |                         |     |                        |             |
| 11   | return_substance_4_11                                                                                                                              | Other (note heavy usage                                        |                                                                                                                                                                                                                                                                                                                                                                                                                                                                                                                                                                                                                                                                                                                                                                                                                                                                                                                                                                                                                                  |   |                      |                                   |    |                      |                                       |   |                      |                                    |   |                      |                              |   |                      |                                   |   |                      |          |   |                      |            |   |                      |         |   |                      |         |    |                       |                |    |                       |                         |     |                        |             |
| 999  | return_substance_4_999                                                                                                                             | None of the                                                    |                                                                                                                                                                                                                                                                                                                                                                                                                                                                                                                                                                                                                                                                                                                                                                                                                                                                                                                                                                                                                                  |   |                      |                                   |    |                      |                                       |   |                      |                                    |   |                      |                              |   |                      |                                   |   |                      |          |   |                      |            |   |                      |         |   |                      |         |    |                       |                |    |                       |                         |     |                        |             |
| 1024 | <b>return_substance_oth_4</b><br><br><b>Show the field ONLY if:</b><br>[return_substance_4(1 1)] = '1'                                             | <b>If "Other," please specify.</b>                             | <b>text</b>                                                                                                                                                                                                                                                                                                                                                                                                                                                                                                                                                                                                                                                                                                                                                                                                                                                                                                                                                                                                                      |   |                      |                                   |    |                      |                                       |   |                      |                                    |   |                      |                              |   |                      |                                   |   |                      |          |   |                      |            |   |                      |         |   |                      |         |    |                       |                |    |                       |                         |     |                        |             |
| 1025 | <b>return_opioid_4</b><br><br><b>Show the field ONLY if:</b><br>[return_substance_4(1)] = '1'                                                      | <b>Which opioid(s) did the patient use?</b>                    | <b>checkbox</b><br><table border="1" data-bbox="1047 1081 1528 1640"> <tr> <td>1</td> <td>return_opioid_4_1</td> <td>Heroin</td> </tr> <tr> <td>2</td> <td>return_opioid_4_2</td> <td>Oxycodone (OxyContin, Percocet, etc.)</td> </tr> <tr> <td>3</td> <td>return_opioid_4_3</td> <td>Hydrocodone (Norco, Vicodin, etc.)</td> </tr> <tr> <td>4</td> <td>return_opioid_4_4</td> <td>Fentanyl (Duragesic, Ionsys)</td> </tr> <tr> <td>5</td> <td>return_opioid_4_5</td> <td>Hydromorphone (Dilaudid)</td> </tr> <tr> <td>6</td> <td>return_opioid_4_6</td> <td>Morphine</td> </tr> <tr> <td>7</td> <td>return_opioid_4_7</td> <td>Other</td> </tr> </table>                                                                                                                                                                                                                                                                                                                                                                        | 1 | return_opioid_4_1    | Heroin                            | 2  | return_opioid_4_2    | Oxycodone (OxyContin, Percocet, etc.) | 3 | return_opioid_4_3    | Hydrocodone (Norco, Vicodin, etc.) | 4 | return_opioid_4_4    | Fentanyl (Duragesic, Ionsys) | 5 | return_opioid_4_5    | Hydromorphone (Dilaudid)          | 6 | return_opioid_4_6    | Morphine | 7 | return_opioid_4_7    | Other      |   |                      |         |   |                      |         |    |                       |                |    |                       |                         |     |                        |             |
| 1    | return_opioid_4_1                                                                                                                                  | Heroin                                                         |                                                                                                                                                                                                                                                                                                                                                                                                                                                                                                                                                                                                                                                                                                                                                                                                                                                                                                                                                                                                                                  |   |                      |                                   |    |                      |                                       |   |                      |                                    |   |                      |                              |   |                      |                                   |   |                      |          |   |                      |            |   |                      |         |   |                      |         |    |                       |                |    |                       |                         |     |                        |             |
| 2    | return_opioid_4_2                                                                                                                                  | Oxycodone (OxyContin, Percocet, etc.)                          |                                                                                                                                                                                                                                                                                                                                                                                                                                                                                                                                                                                                                                                                                                                                                                                                                                                                                                                                                                                                                                  |   |                      |                                   |    |                      |                                       |   |                      |                                    |   |                      |                              |   |                      |                                   |   |                      |          |   |                      |            |   |                      |         |   |                      |         |    |                       |                |    |                       |                         |     |                        |             |
| 3    | return_opioid_4_3                                                                                                                                  | Hydrocodone (Norco, Vicodin, etc.)                             |                                                                                                                                                                                                                                                                                                                                                                                                                                                                                                                                                                                                                                                                                                                                                                                                                                                                                                                                                                                                                                  |   |                      |                                   |    |                      |                                       |   |                      |                                    |   |                      |                              |   |                      |                                   |   |                      |          |   |                      |            |   |                      |         |   |                      |         |    |                       |                |    |                       |                         |     |                        |             |
| 4    | return_opioid_4_4                                                                                                                                  | Fentanyl (Duragesic, Ionsys)                                   |                                                                                                                                                                                                                                                                                                                                                                                                                                                                                                                                                                                                                                                                                                                                                                                                                                                                                                                                                                                                                                  |   |                      |                                   |    |                      |                                       |   |                      |                                    |   |                      |                              |   |                      |                                   |   |                      |          |   |                      |            |   |                      |         |   |                      |         |    |                       |                |    |                       |                         |     |                        |             |
| 5    | return_opioid_4_5                                                                                                                                  | Hydromorphone (Dilaudid)                                       |                                                                                                                                                                                                                                                                                                                                                                                                                                                                                                                                                                                                                                                                                                                                                                                                                                                                                                                                                                                                                                  |   |                      |                                   |    |                      |                                       |   |                      |                                    |   |                      |                              |   |                      |                                   |   |                      |          |   |                      |            |   |                      |         |   |                      |         |    |                       |                |    |                       |                         |     |                        |             |
| 6    | return_opioid_4_6                                                                                                                                  | Morphine                                                       |                                                                                                                                                                                                                                                                                                                                                                                                                                                                                                                                                                                                                                                                                                                                                                                                                                                                                                                                                                                                                                  |   |                      |                                   |    |                      |                                       |   |                      |                                    |   |                      |                              |   |                      |                                   |   |                      |          |   |                      |            |   |                      |         |   |                      |         |    |                       |                |    |                       |                         |     |                        |             |
| 7    | return_opioid_4_7                                                                                                                                  | Other                                                          |                                                                                                                                                                                                                                                                                                                                                                                                                                                                                                                                                                                                                                                                                                                                                                                                                                                                                                                                                                                                                                  |   |                      |                                   |    |                      |                                       |   |                      |                                    |   |                      |                              |   |                      |                                   |   |                      |          |   |                      |            |   |                      |         |   |                      |         |    |                       |                |    |                       |                         |     |                        |             |
| 1026 | <b>return_opioid_oth_4</b><br><br><b>Show the field ONLY if:</b><br>[return_opioid_4(7)] = '1'                                                     | <b>If "Other," please specify.</b>                             | <b>text</b>                                                                                                                                                                                                                                                                                                                                                                                                                                                                                                                                                                                                                                                                                                                                                                                                                                                                                                                                                                                                                      |   |                      |                                   |    |                      |                                       |   |                      |                                    |   |                      |                              |   |                      |                                   |   |                      |          |   |                      |            |   |                      |         |   |                      |         |    |                       |                |    |                       |                         |     |                        |             |
| 1027 | <b>return_utox_4</b><br><br><b>Show the field ONLY if:</b><br>[return_num] = '4' or [return_num] = '5' or [return_num] = '6' or [return_num] = '7' | <b>Was a urine toxicology screen performed for this visit?</b> | <b>yesno</b><br><table border="1" data-bbox="1047 1854 1141 1948"> <tr> <td>1</td> <td>Yes</td> </tr> <tr> <td>0</td> <td>No</td> </tr> </table>                                                                                                                                                                                                                                                                                                                                                                                                                                                                                                                                                                                                                                                                                                                                                                                                                                                                                 | 1 | Yes                  | 0                                 | No |                      |                                       |   |                      |                                    |   |                      |                              |   |                      |                                   |   |                      |          |   |                      |            |   |                      |         |   |                      |         |    |                       |                |    |                       |                         |     |                        |             |
| 1    | Yes                                                                                                                                                |                                                                |                                                                                                                                                                                                                                                                                                                                                                                                                                                                                                                                                                                                                                                                                                                                                                                                                                                                                                                                                                                                                                  |   |                      |                                   |    |                      |                                       |   |                      |                                    |   |                      |                              |   |                      |                                   |   |                      |          |   |                      |            |   |                      |         |   |                      |         |    |                       |                |    |                       |                         |     |                        |             |
| 0    | No                                                                                                                                                 |                                                                |                                                                                                                                                                                                                                                                                                                                                                                                                                                                                                                                                                                                                                                                                                                                                                                                                                                                                                                                                                                                                                  |   |                      |                                   |    |                      |                                       |   |                      |                                    |   |                      |                              |   |                      |                                   |   |                      |          |   |                      |            |   |                      |         |   |                      |         |    |                       |                |    |                       |                         |     |                        |             |

|                 |                                                                                                                                                              |                                                                                                                                                                                                                                                            |                                                                                                                                                                                                                                                                                                                                                                                                                                                                                                                                                                                                                                                                                                                                                                                                                                                                                                                                                                                                                                                                                                                              |                 |     |   |    |                      |           |   |                      |                                          |   |                      |                                         |   |                      |                   |   |                      |           |   |                      |           |   |                      |         |   |                      |              |   |                      |           |    |                       |             |    |                       |           |    |                       |           |    |                       |       |     |                        |             |
|-----------------|--------------------------------------------------------------------------------------------------------------------------------------------------------------|------------------------------------------------------------------------------------------------------------------------------------------------------------------------------------------------------------------------------------------------------------|------------------------------------------------------------------------------------------------------------------------------------------------------------------------------------------------------------------------------------------------------------------------------------------------------------------------------------------------------------------------------------------------------------------------------------------------------------------------------------------------------------------------------------------------------------------------------------------------------------------------------------------------------------------------------------------------------------------------------------------------------------------------------------------------------------------------------------------------------------------------------------------------------------------------------------------------------------------------------------------------------------------------------------------------------------------------------------------------------------------------------|-----------------|-----|---|----|----------------------|-----------|---|----------------------|------------------------------------------|---|----------------------|-----------------------------------------|---|----------------------|-------------------|---|----------------------|-----------|---|----------------------|-----------|---|----------------------|---------|---|----------------------|--------------|---|----------------------|-----------|----|-----------------------|-------------|----|-----------------------|-----------|----|-----------------------|-----------|----|-----------------------|-------|-----|------------------------|-------------|
| 1028            | <b>return_utox_spec_4</b><br><br><b>Show the field ONLY if:</b><br><b>[return_utox_4] = '1'</b>                                                              | <b>Please select all drugs shown to be positive in the urine toxicology analysis:</b>                                                                                                                                                                      | <table border="1"> <tr> <td colspan="3"><b>checkbox</b></td> </tr> <tr> <td>1</td> <td>return_utox_spec_4_1</td> <td>Amphetami</td> </tr> <tr> <td>2</td> <td>return_utox_spec_4_2</td> <td>Barbiturates</td> </tr> <tr> <td>3</td> <td>return_utox_spec_4_3</td> <td>Cocaine</td> </tr> <tr> <td>4</td> <td>return_utox_spec_4_4</td> <td>Methaqualo</td> </tr> <tr> <td>5</td> <td>return_utox_spec_4_5</td> <td>Methadone</td> </tr> <tr> <td>6</td> <td>return_utox_spec_4_6</td> <td>Methamphe</td> </tr> <tr> <td>7</td> <td>return_utox_spec_4_7</td> <td>Opiates</td> </tr> <tr> <td>8</td> <td>return_utox_spec_4_8</td> <td>Phencyclidin</td> </tr> <tr> <td>9</td> <td>return_utox_spec_4_9</td> <td>Marijuana</td> </tr> <tr> <td>10</td> <td>return_utox_spec_4_10</td> <td>Benzodiazep</td> </tr> <tr> <td>11</td> <td>return_utox_spec_4_11</td> <td>Propoxyph</td> </tr> <tr> <td>12</td> <td>return_utox_spec_4_12</td> <td>Amphetami</td> </tr> <tr> <td>13</td> <td>return_utox_spec_4_13</td> <td>Other</td> </tr> <tr> <td>999</td> <td>return_utox_spec_4_999</td> <td>None of the</td> </tr> </table> | <b>checkbox</b> |     |   | 1  | return_utox_spec_4_1 | Amphetami | 2 | return_utox_spec_4_2 | Barbiturates                             | 3 | return_utox_spec_4_3 | Cocaine                                 | 4 | return_utox_spec_4_4 | Methaqualo        | 5 | return_utox_spec_4_5 | Methadone | 6 | return_utox_spec_4_6 | Methamphe | 7 | return_utox_spec_4_7 | Opiates | 8 | return_utox_spec_4_8 | Phencyclidin | 9 | return_utox_spec_4_9 | Marijuana | 10 | return_utox_spec_4_10 | Benzodiazep | 11 | return_utox_spec_4_11 | Propoxyph | 12 | return_utox_spec_4_12 | Amphetami | 13 | return_utox_spec_4_13 | Other | 999 | return_utox_spec_4_999 | None of the |
| <b>checkbox</b> |                                                                                                                                                              |                                                                                                                                                                                                                                                            |                                                                                                                                                                                                                                                                                                                                                                                                                                                                                                                                                                                                                                                                                                                                                                                                                                                                                                                                                                                                                                                                                                                              |                 |     |   |    |                      |           |   |                      |                                          |   |                      |                                         |   |                      |                   |   |                      |           |   |                      |           |   |                      |         |   |                      |              |   |                      |           |    |                       |             |    |                       |           |    |                       |           |    |                       |       |     |                        |             |
| 1               | return_utox_spec_4_1                                                                                                                                         | Amphetami                                                                                                                                                                                                                                                  |                                                                                                                                                                                                                                                                                                                                                                                                                                                                                                                                                                                                                                                                                                                                                                                                                                                                                                                                                                                                                                                                                                                              |                 |     |   |    |                      |           |   |                      |                                          |   |                      |                                         |   |                      |                   |   |                      |           |   |                      |           |   |                      |         |   |                      |              |   |                      |           |    |                       |             |    |                       |           |    |                       |           |    |                       |       |     |                        |             |
| 2               | return_utox_spec_4_2                                                                                                                                         | Barbiturates                                                                                                                                                                                                                                               |                                                                                                                                                                                                                                                                                                                                                                                                                                                                                                                                                                                                                                                                                                                                                                                                                                                                                                                                                                                                                                                                                                                              |                 |     |   |    |                      |           |   |                      |                                          |   |                      |                                         |   |                      |                   |   |                      |           |   |                      |           |   |                      |         |   |                      |              |   |                      |           |    |                       |             |    |                       |           |    |                       |           |    |                       |       |     |                        |             |
| 3               | return_utox_spec_4_3                                                                                                                                         | Cocaine                                                                                                                                                                                                                                                    |                                                                                                                                                                                                                                                                                                                                                                                                                                                                                                                                                                                                                                                                                                                                                                                                                                                                                                                                                                                                                                                                                                                              |                 |     |   |    |                      |           |   |                      |                                          |   |                      |                                         |   |                      |                   |   |                      |           |   |                      |           |   |                      |         |   |                      |              |   |                      |           |    |                       |             |    |                       |           |    |                       |           |    |                       |       |     |                        |             |
| 4               | return_utox_spec_4_4                                                                                                                                         | Methaqualo                                                                                                                                                                                                                                                 |                                                                                                                                                                                                                                                                                                                                                                                                                                                                                                                                                                                                                                                                                                                                                                                                                                                                                                                                                                                                                                                                                                                              |                 |     |   |    |                      |           |   |                      |                                          |   |                      |                                         |   |                      |                   |   |                      |           |   |                      |           |   |                      |         |   |                      |              |   |                      |           |    |                       |             |    |                       |           |    |                       |           |    |                       |       |     |                        |             |
| 5               | return_utox_spec_4_5                                                                                                                                         | Methadone                                                                                                                                                                                                                                                  |                                                                                                                                                                                                                                                                                                                                                                                                                                                                                                                                                                                                                                                                                                                                                                                                                                                                                                                                                                                                                                                                                                                              |                 |     |   |    |                      |           |   |                      |                                          |   |                      |                                         |   |                      |                   |   |                      |           |   |                      |           |   |                      |         |   |                      |              |   |                      |           |    |                       |             |    |                       |           |    |                       |           |    |                       |       |     |                        |             |
| 6               | return_utox_spec_4_6                                                                                                                                         | Methamphe                                                                                                                                                                                                                                                  |                                                                                                                                                                                                                                                                                                                                                                                                                                                                                                                                                                                                                                                                                                                                                                                                                                                                                                                                                                                                                                                                                                                              |                 |     |   |    |                      |           |   |                      |                                          |   |                      |                                         |   |                      |                   |   |                      |           |   |                      |           |   |                      |         |   |                      |              |   |                      |           |    |                       |             |    |                       |           |    |                       |           |    |                       |       |     |                        |             |
| 7               | return_utox_spec_4_7                                                                                                                                         | Opiates                                                                                                                                                                                                                                                    |                                                                                                                                                                                                                                                                                                                                                                                                                                                                                                                                                                                                                                                                                                                                                                                                                                                                                                                                                                                                                                                                                                                              |                 |     |   |    |                      |           |   |                      |                                          |   |                      |                                         |   |                      |                   |   |                      |           |   |                      |           |   |                      |         |   |                      |              |   |                      |           |    |                       |             |    |                       |           |    |                       |           |    |                       |       |     |                        |             |
| 8               | return_utox_spec_4_8                                                                                                                                         | Phencyclidin                                                                                                                                                                                                                                               |                                                                                                                                                                                                                                                                                                                                                                                                                                                                                                                                                                                                                                                                                                                                                                                                                                                                                                                                                                                                                                                                                                                              |                 |     |   |    |                      |           |   |                      |                                          |   |                      |                                         |   |                      |                   |   |                      |           |   |                      |           |   |                      |         |   |                      |              |   |                      |           |    |                       |             |    |                       |           |    |                       |           |    |                       |       |     |                        |             |
| 9               | return_utox_spec_4_9                                                                                                                                         | Marijuana                                                                                                                                                                                                                                                  |                                                                                                                                                                                                                                                                                                                                                                                                                                                                                                                                                                                                                                                                                                                                                                                                                                                                                                                                                                                                                                                                                                                              |                 |     |   |    |                      |           |   |                      |                                          |   |                      |                                         |   |                      |                   |   |                      |           |   |                      |           |   |                      |         |   |                      |              |   |                      |           |    |                       |             |    |                       |           |    |                       |           |    |                       |       |     |                        |             |
| 10              | return_utox_spec_4_10                                                                                                                                        | Benzodiazep                                                                                                                                                                                                                                                |                                                                                                                                                                                                                                                                                                                                                                                                                                                                                                                                                                                                                                                                                                                                                                                                                                                                                                                                                                                                                                                                                                                              |                 |     |   |    |                      |           |   |                      |                                          |   |                      |                                         |   |                      |                   |   |                      |           |   |                      |           |   |                      |         |   |                      |              |   |                      |           |    |                       |             |    |                       |           |    |                       |           |    |                       |       |     |                        |             |
| 11              | return_utox_spec_4_11                                                                                                                                        | Propoxyph                                                                                                                                                                                                                                                  |                                                                                                                                                                                                                                                                                                                                                                                                                                                                                                                                                                                                                                                                                                                                                                                                                                                                                                                                                                                                                                                                                                                              |                 |     |   |    |                      |           |   |                      |                                          |   |                      |                                         |   |                      |                   |   |                      |           |   |                      |           |   |                      |         |   |                      |              |   |                      |           |    |                       |             |    |                       |           |    |                       |           |    |                       |       |     |                        |             |
| 12              | return_utox_spec_4_12                                                                                                                                        | Amphetami                                                                                                                                                                                                                                                  |                                                                                                                                                                                                                                                                                                                                                                                                                                                                                                                                                                                                                                                                                                                                                                                                                                                                                                                                                                                                                                                                                                                              |                 |     |   |    |                      |           |   |                      |                                          |   |                      |                                         |   |                      |                   |   |                      |           |   |                      |           |   |                      |         |   |                      |              |   |                      |           |    |                       |             |    |                       |           |    |                       |           |    |                       |       |     |                        |             |
| 13              | return_utox_spec_4_13                                                                                                                                        | Other                                                                                                                                                                                                                                                      |                                                                                                                                                                                                                                                                                                                                                                                                                                                                                                                                                                                                                                                                                                                                                                                                                                                                                                                                                                                                                                                                                                                              |                 |     |   |    |                      |           |   |                      |                                          |   |                      |                                         |   |                      |                   |   |                      |           |   |                      |           |   |                      |         |   |                      |              |   |                      |           |    |                       |             |    |                       |           |    |                       |           |    |                       |       |     |                        |             |
| 999             | return_utox_spec_4_999                                                                                                                                       | None of the                                                                                                                                                                                                                                                |                                                                                                                                                                                                                                                                                                                                                                                                                                                                                                                                                                                                                                                                                                                                                                                                                                                                                                                                                                                                                                                                                                                              |                 |     |   |    |                      |           |   |                      |                                          |   |                      |                                         |   |                      |                   |   |                      |           |   |                      |           |   |                      |         |   |                      |              |   |                      |           |    |                       |             |    |                       |           |    |                       |           |    |                       |       |     |                        |             |
| 1029            | <b>return_utox_oth_4</b><br><br><b>Show the field ONLY if:</b><br><b>[return_utox_spec_4(13)] = '1'</b>                                                      | <b>If "Other," please specify</b>                                                                                                                                                                                                                          | <b>text</b>                                                                                                                                                                                                                                                                                                                                                                                                                                                                                                                                                                                                                                                                                                                                                                                                                                                                                                                                                                                                                                                                                                                  |                 |     |   |    |                      |           |   |                      |                                          |   |                      |                                         |   |                      |                   |   |                      |           |   |                      |           |   |                      |         |   |                      |              |   |                      |           |    |                       |             |    |                       |           |    |                       |           |    |                       |       |     |                        |             |
| 1030            | <b>return_craving_4</b><br><br><b>Show the field ONLY if:</b><br><b>[return_num] = '4' or [return_num] = '5' or [return_num] = '6' or [return_num] = '7'</b> | <b>Did the patient or provider mention opioid cravings during the visit?</b>                                                                                                                                                                               | <b>yesno</b><br><table border="1"> <tr> <td>1</td> <td>Yes</td> </tr> <tr> <td>0</td> <td>No</td> </tr> </table>                                                                                                                                                                                                                                                                                                                                                                                                                                                                                                                                                                                                                                                                                                                                                                                                                                                                                                                                                                                                             | 1               | Yes | 0 | No |                      |           |   |                      |                                          |   |                      |                                         |   |                      |                   |   |                      |           |   |                      |           |   |                      |         |   |                      |              |   |                      |           |    |                       |             |    |                       |           |    |                       |           |    |                       |       |     |                        |             |
| 1               | Yes                                                                                                                                                          |                                                                                                                                                                                                                                                            |                                                                                                                                                                                                                                                                                                                                                                                                                                                                                                                                                                                                                                                                                                                                                                                                                                                                                                                                                                                                                                                                                                                              |                 |     |   |    |                      |           |   |                      |                                          |   |                      |                                         |   |                      |                   |   |                      |           |   |                      |           |   |                      |         |   |                      |              |   |                      |           |    |                       |             |    |                       |           |    |                       |           |    |                       |       |     |                        |             |
| 0               | No                                                                                                                                                           |                                                                                                                                                                                                                                                            |                                                                                                                                                                                                                                                                                                                                                                                                                                                                                                                                                                                                                                                                                                                                                                                                                                                                                                                                                                                                                                                                                                                              |                 |     |   |    |                      |           |   |                      |                                          |   |                      |                                         |   |                      |                   |   |                      |           |   |                      |           |   |                      |         |   |                      |              |   |                      |           |    |                       |             |    |                       |           |    |                       |           |    |                       |       |     |                        |             |
| 1031            | <b>return_wd_4</b><br><br><b>Show the field ONLY if:</b><br><b>[return_num] = '4' or [return_num] = '5' or [return_num] = '6' or [return_num] = '7'</b>      | <b>Did the patient complaint about or exhibit any signs or symptoms of withdrawal during this visit?</b><br><br><i>If the patient received buprenorphine during this visit, only select signs/symptoms documented BEFORE buprenorphine administration.</i> | <b>yesno</b><br><table border="1"> <tr> <td>1</td> <td>Yes</td> </tr> <tr> <td>0</td> <td>No</td> </tr> </table>                                                                                                                                                                                                                                                                                                                                                                                                                                                                                                                                                                                                                                                                                                                                                                                                                                                                                                                                                                                                             | 1               | Yes | 0 | No |                      |           |   |                      |                                          |   |                      |                                         |   |                      |                   |   |                      |           |   |                      |           |   |                      |         |   |                      |              |   |                      |           |    |                       |             |    |                       |           |    |                       |           |    |                       |       |     |                        |             |
| 1               | Yes                                                                                                                                                          |                                                                                                                                                                                                                                                            |                                                                                                                                                                                                                                                                                                                                                                                                                                                                                                                                                                                                                                                                                                                                                                                                                                                                                                                                                                                                                                                                                                                              |                 |     |   |    |                      |           |   |                      |                                          |   |                      |                                         |   |                      |                   |   |                      |           |   |                      |           |   |                      |         |   |                      |              |   |                      |           |    |                       |             |    |                       |           |    |                       |           |    |                       |       |     |                        |             |
| 0               | No                                                                                                                                                           |                                                                                                                                                                                                                                                            |                                                                                                                                                                                                                                                                                                                                                                                                                                                                                                                                                                                                                                                                                                                                                                                                                                                                                                                                                                                                                                                                                                                              |                 |     |   |    |                      |           |   |                      |                                          |   |                      |                                         |   |                      |                   |   |                      |           |   |                      |           |   |                      |         |   |                      |              |   |                      |           |    |                       |             |    |                       |           |    |                       |           |    |                       |       |     |                        |             |
| 1032            | <b>return_sedation_4</b><br><br><b>Show the field ONLY if:</b><br><b>[return_wd_4] = '1'</b>                                                                 | <b>Section Header:</b> <i>Return Sedation 4</i><br><br><b>Which of the following signs or symptoms of sedation were documented?</b>                                                                                                                        | <table border="1"> <tr> <td colspan="3"><b>checkbox</b></td> </tr> <tr> <td>1</td> <td>return_sedation_4_1</td> <td>Nodding</td> </tr> <tr> <td>2</td> <td>return_sedation_4_2</td> <td>Sleepy, drowsy, difficulty staying awake</td> </tr> <tr> <td>3</td> <td>return_sedation_4_3</td> <td>Feelings of general fatigue or weakness</td> </tr> <tr> <td>0</td> <td>return_sedation_4_0</td> <td>None of the above</td> </tr> </table>                                                                                                                                                                                                                                                                                                                                                                                                                                                                                                                                                                                                                                                                                       | <b>checkbox</b> |     |   | 1  | return_sedation_4_1  | Nodding   | 2 | return_sedation_4_2  | Sleepy, drowsy, difficulty staying awake | 3 | return_sedation_4_3  | Feelings of general fatigue or weakness | 0 | return_sedation_4_0  | None of the above |   |                      |           |   |                      |           |   |                      |         |   |                      |              |   |                      |           |    |                       |             |    |                       |           |    |                       |           |    |                       |       |     |                        |             |
| <b>checkbox</b> |                                                                                                                                                              |                                                                                                                                                                                                                                                            |                                                                                                                                                                                                                                                                                                                                                                                                                                                                                                                                                                                                                                                                                                                                                                                                                                                                                                                                                                                                                                                                                                                              |                 |     |   |    |                      |           |   |                      |                                          |   |                      |                                         |   |                      |                   |   |                      |           |   |                      |           |   |                      |         |   |                      |              |   |                      |           |    |                       |             |    |                       |           |    |                       |           |    |                       |       |     |                        |             |
| 1               | return_sedation_4_1                                                                                                                                          | Nodding                                                                                                                                                                                                                                                    |                                                                                                                                                                                                                                                                                                                                                                                                                                                                                                                                                                                                                                                                                                                                                                                                                                                                                                                                                                                                                                                                                                                              |                 |     |   |    |                      |           |   |                      |                                          |   |                      |                                         |   |                      |                   |   |                      |           |   |                      |           |   |                      |         |   |                      |              |   |                      |           |    |                       |             |    |                       |           |    |                       |           |    |                       |       |     |                        |             |
| 2               | return_sedation_4_2                                                                                                                                          | Sleepy, drowsy, difficulty staying awake                                                                                                                                                                                                                   |                                                                                                                                                                                                                                                                                                                                                                                                                                                                                                                                                                                                                                                                                                                                                                                                                                                                                                                                                                                                                                                                                                                              |                 |     |   |    |                      |           |   |                      |                                          |   |                      |                                         |   |                      |                   |   |                      |           |   |                      |           |   |                      |         |   |                      |              |   |                      |           |    |                       |             |    |                       |           |    |                       |           |    |                       |       |     |                        |             |
| 3               | return_sedation_4_3                                                                                                                                          | Feelings of general fatigue or weakness                                                                                                                                                                                                                    |                                                                                                                                                                                                                                                                                                                                                                                                                                                                                                                                                                                                                                                                                                                                                                                                                                                                                                                                                                                                                                                                                                                              |                 |     |   |    |                      |           |   |                      |                                          |   |                      |                                         |   |                      |                   |   |                      |           |   |                      |           |   |                      |         |   |                      |              |   |                      |           |    |                       |             |    |                       |           |    |                       |           |    |                       |       |     |                        |             |
| 0               | return_sedation_4_0                                                                                                                                          | None of the above                                                                                                                                                                                                                                          |                                                                                                                                                                                                                                                                                                                                                                                                                                                                                                                                                                                                                                                                                                                                                                                                                                                                                                                                                                                                                                                                                                                              |                 |     |   |    |                      |           |   |                      |                                          |   |                      |                                         |   |                      |                   |   |                      |           |   |                      |           |   |                      |         |   |                      |              |   |                      |           |    |                       |             |    |                       |           |    |                       |           |    |                       |       |     |                        |             |

|                                                                                            |                    |                                                                                                                                                    |                                                                                                                                                                                                                                                                                                                                                                                                                                                                                                                                                                                                                                                                                                                                                                                                                                                                                                                                                                                                                                               |   |                    |                                     |   |                    |                                       |   |                    |               |   |                    |                |   |                    |                   |   |                  |                   |   |                  |                     |   |                  |      |   |                  |          |    |                   |         |    |                   |                          |    |                   |                              |    |                   |                  |   |                  |                   |
|--------------------------------------------------------------------------------------------|--------------------|----------------------------------------------------------------------------------------------------------------------------------------------------|-----------------------------------------------------------------------------------------------------------------------------------------------------------------------------------------------------------------------------------------------------------------------------------------------------------------------------------------------------------------------------------------------------------------------------------------------------------------------------------------------------------------------------------------------------------------------------------------------------------------------------------------------------------------------------------------------------------------------------------------------------------------------------------------------------------------------------------------------------------------------------------------------------------------------------------------------------------------------------------------------------------------------------------------------|---|--------------------|-------------------------------------|---|--------------------|---------------------------------------|---|--------------------|---------------|---|--------------------|----------------|---|--------------------|-------------------|---|------------------|-------------------|---|------------------|---------------------|---|------------------|------|---|------------------|----------|----|-------------------|---------|----|-------------------|--------------------------|----|-------------------|------------------------------|----|-------------------|------------------|---|------------------|-------------------|
| <p><b>1033 return_intox_4</b></p> <p>Show the field ONLY if:<br/>[return_wd_4] = '1'</p>   |                    | <p><b>Section Header:</b> <i>Return Intoxication 4</i></p> <p><b>Which of the following signs or symptoms of intoxication were documented?</b></p> | <p><b>checkbox</b></p> <table border="1"> <tr><td>1</td><td>return_intox_4_1</td><td>Good mood</td></tr> <tr><td>2</td><td>return_intox_4_2</td><td>Coasting (Spaced out)</td></tr> <tr><td>3</td><td>return_intox_4_3</td><td>Pleasant Sick</td></tr> <tr><td>4</td><td>return_intox_4_4</td><td>Drive (energy)</td></tr> <tr><td>5</td><td>return_intox_4_5</td><td>High</td></tr> <tr><td>6</td><td>return_intox_4_6</td><td>Drunken</td></tr> <tr><td>7</td><td>return_intox_4_7</td><td>Soapbox (talkative)</td></tr> <tr><td>8</td><td>return_intox_4_8</td><td>Rush</td></tr> <tr><td>9</td><td>return_intox_4_9</td><td>Friendly</td></tr> <tr><td>10</td><td>return_intox_4_10</td><td>Relaxed</td></tr> <tr><td>11</td><td>return_intox_4_11</td><td>Difficulty concentrating</td></tr> <tr><td>12</td><td>return_intox_4_12</td><td>Feeling lightheaded or dizzy</td></tr> <tr><td>13</td><td>return_intox_4_13</td><td>Feeling confused</td></tr> <tr><td>0</td><td>return_intox_4_0</td><td>None of the above</td></tr> </table> | 1 | return_intox_4_1   | Good mood                           | 2 | return_intox_4_2   | Coasting (Spaced out)                 | 3 | return_intox_4_3   | Pleasant Sick | 4 | return_intox_4_4   | Drive (energy) | 5 | return_intox_4_5   | High              | 6 | return_intox_4_6 | Drunken           | 7 | return_intox_4_7 | Soapbox (talkative) | 8 | return_intox_4_8 | Rush | 9 | return_intox_4_9 | Friendly | 10 | return_intox_4_10 | Relaxed | 11 | return_intox_4_11 | Difficulty concentrating | 12 | return_intox_4_12 | Feeling lightheaded or dizzy | 13 | return_intox_4_13 | Feeling confused | 0 | return_intox_4_0 | None of the above |
| 1                                                                                          | return_intox_4_1   | Good mood                                                                                                                                          |                                                                                                                                                                                                                                                                                                                                                                                                                                                                                                                                                                                                                                                                                                                                                                                                                                                                                                                                                                                                                                               |   |                    |                                     |   |                    |                                       |   |                    |               |   |                    |                |   |                    |                   |   |                  |                   |   |                  |                     |   |                  |      |   |                  |          |    |                   |         |    |                   |                          |    |                   |                              |    |                   |                  |   |                  |                   |
| 2                                                                                          | return_intox_4_2   | Coasting (Spaced out)                                                                                                                              |                                                                                                                                                                                                                                                                                                                                                                                                                                                                                                                                                                                                                                                                                                                                                                                                                                                                                                                                                                                                                                               |   |                    |                                     |   |                    |                                       |   |                    |               |   |                    |                |   |                    |                   |   |                  |                   |   |                  |                     |   |                  |      |   |                  |          |    |                   |         |    |                   |                          |    |                   |                              |    |                   |                  |   |                  |                   |
| 3                                                                                          | return_intox_4_3   | Pleasant Sick                                                                                                                                      |                                                                                                                                                                                                                                                                                                                                                                                                                                                                                                                                                                                                                                                                                                                                                                                                                                                                                                                                                                                                                                               |   |                    |                                     |   |                    |                                       |   |                    |               |   |                    |                |   |                    |                   |   |                  |                   |   |                  |                     |   |                  |      |   |                  |          |    |                   |         |    |                   |                          |    |                   |                              |    |                   |                  |   |                  |                   |
| 4                                                                                          | return_intox_4_4   | Drive (energy)                                                                                                                                     |                                                                                                                                                                                                                                                                                                                                                                                                                                                                                                                                                                                                                                                                                                                                                                                                                                                                                                                                                                                                                                               |   |                    |                                     |   |                    |                                       |   |                    |               |   |                    |                |   |                    |                   |   |                  |                   |   |                  |                     |   |                  |      |   |                  |          |    |                   |         |    |                   |                          |    |                   |                              |    |                   |                  |   |                  |                   |
| 5                                                                                          | return_intox_4_5   | High                                                                                                                                               |                                                                                                                                                                                                                                                                                                                                                                                                                                                                                                                                                                                                                                                                                                                                                                                                                                                                                                                                                                                                                                               |   |                    |                                     |   |                    |                                       |   |                    |               |   |                    |                |   |                    |                   |   |                  |                   |   |                  |                     |   |                  |      |   |                  |          |    |                   |         |    |                   |                          |    |                   |                              |    |                   |                  |   |                  |                   |
| 6                                                                                          | return_intox_4_6   | Drunken                                                                                                                                            |                                                                                                                                                                                                                                                                                                                                                                                                                                                                                                                                                                                                                                                                                                                                                                                                                                                                                                                                                                                                                                               |   |                    |                                     |   |                    |                                       |   |                    |               |   |                    |                |   |                    |                   |   |                  |                   |   |                  |                     |   |                  |      |   |                  |          |    |                   |         |    |                   |                          |    |                   |                              |    |                   |                  |   |                  |                   |
| 7                                                                                          | return_intox_4_7   | Soapbox (talkative)                                                                                                                                |                                                                                                                                                                                                                                                                                                                                                                                                                                                                                                                                                                                                                                                                                                                                                                                                                                                                                                                                                                                                                                               |   |                    |                                     |   |                    |                                       |   |                    |               |   |                    |                |   |                    |                   |   |                  |                   |   |                  |                     |   |                  |      |   |                  |          |    |                   |         |    |                   |                          |    |                   |                              |    |                   |                  |   |                  |                   |
| 8                                                                                          | return_intox_4_8   | Rush                                                                                                                                               |                                                                                                                                                                                                                                                                                                                                                                                                                                                                                                                                                                                                                                                                                                                                                                                                                                                                                                                                                                                                                                               |   |                    |                                     |   |                    |                                       |   |                    |               |   |                    |                |   |                    |                   |   |                  |                   |   |                  |                     |   |                  |      |   |                  |          |    |                   |         |    |                   |                          |    |                   |                              |    |                   |                  |   |                  |                   |
| 9                                                                                          | return_intox_4_9   | Friendly                                                                                                                                           |                                                                                                                                                                                                                                                                                                                                                                                                                                                                                                                                                                                                                                                                                                                                                                                                                                                                                                                                                                                                                                               |   |                    |                                     |   |                    |                                       |   |                    |               |   |                    |                |   |                    |                   |   |                  |                   |   |                  |                     |   |                  |      |   |                  |          |    |                   |         |    |                   |                          |    |                   |                              |    |                   |                  |   |                  |                   |
| 10                                                                                         | return_intox_4_10  | Relaxed                                                                                                                                            |                                                                                                                                                                                                                                                                                                                                                                                                                                                                                                                                                                                                                                                                                                                                                                                                                                                                                                                                                                                                                                               |   |                    |                                     |   |                    |                                       |   |                    |               |   |                    |                |   |                    |                   |   |                  |                   |   |                  |                     |   |                  |      |   |                  |          |    |                   |         |    |                   |                          |    |                   |                              |    |                   |                  |   |                  |                   |
| 11                                                                                         | return_intox_4_11  | Difficulty concentrating                                                                                                                           |                                                                                                                                                                                                                                                                                                                                                                                                                                                                                                                                                                                                                                                                                                                                                                                                                                                                                                                                                                                                                                               |   |                    |                                     |   |                    |                                       |   |                    |               |   |                    |                |   |                    |                   |   |                  |                   |   |                  |                     |   |                  |      |   |                  |          |    |                   |         |    |                   |                          |    |                   |                              |    |                   |                  |   |                  |                   |
| 12                                                                                         | return_intox_4_12  | Feeling lightheaded or dizzy                                                                                                                       |                                                                                                                                                                                                                                                                                                                                                                                                                                                                                                                                                                                                                                                                                                                                                                                                                                                                                                                                                                                                                                               |   |                    |                                     |   |                    |                                       |   |                    |               |   |                    |                |   |                    |                   |   |                  |                   |   |                  |                     |   |                  |      |   |                  |          |    |                   |         |    |                   |                          |    |                   |                              |    |                   |                  |   |                  |                   |
| 13                                                                                         | return_intox_4_13  | Feeling confused                                                                                                                                   |                                                                                                                                                                                                                                                                                                                                                                                                                                                                                                                                                                                                                                                                                                                                                                                                                                                                                                                                                                                                                                               |   |                    |                                     |   |                    |                                       |   |                    |               |   |                    |                |   |                    |                   |   |                  |                   |   |                  |                     |   |                  |      |   |                  |          |    |                   |         |    |                   |                          |    |                   |                              |    |                   |                  |   |                  |                   |
| 0                                                                                          | return_intox_4_0   | None of the above                                                                                                                                  |                                                                                                                                                                                                                                                                                                                                                                                                                                                                                                                                                                                                                                                                                                                                                                                                                                                                                                                                                                                                                                               |   |                    |                                     |   |                    |                                       |   |                    |               |   |                    |                |   |                    |                   |   |                  |                   |   |                  |                     |   |                  |      |   |                  |          |    |                   |         |    |                   |                          |    |                   |                              |    |                   |                  |   |                  |                   |
| <p><b>1034 return_gi_4</b></p> <p>Show the field ONLY if:<br/>[return_wd_4] = '1'</p>      |                    | <p><b>Section Header:</b> <i>Return GI 4</i></p> <p><b>Which of the following gastrointestinal signs or symptoms were documented?</b></p>          | <p><b>checkbox</b></p> <table border="1"> <tr><td>1</td><td>return_gi_4_1</td><td>Constipation</td></tr> <tr><td>2</td><td>return_gi_4_2</td><td>Turning of stomach/cramping/abdo pain</td></tr> <tr><td>3</td><td>return_gi_4_3</td><td>Nausea</td></tr> <tr><td>4</td><td>return_gi_4_4</td><td>Vomiting</td></tr> <tr><td>5</td><td>return_gi_4_5</td><td>Diarrhea</td></tr> <tr><td>0</td><td>return_gi_4_0</td><td>None of the above</td></tr> </table>                                                                                                                                                                                                                                                                                                                                                                                                                                                                                                                                                                                  | 1 | return_gi_4_1      | Constipation                        | 2 | return_gi_4_2      | Turning of stomach/cramping/abdo pain | 3 | return_gi_4_3      | Nausea        | 4 | return_gi_4_4      | Vomiting       | 5 | return_gi_4_5      | Diarrhea          | 0 | return_gi_4_0    | None of the above |   |                  |                     |   |                  |      |   |                  |          |    |                   |         |    |                   |                          |    |                   |                              |    |                   |                  |   |                  |                   |
| 1                                                                                          | return_gi_4_1      | Constipation                                                                                                                                       |                                                                                                                                                                                                                                                                                                                                                                                                                                                                                                                                                                                                                                                                                                                                                                                                                                                                                                                                                                                                                                               |   |                    |                                     |   |                    |                                       |   |                    |               |   |                    |                |   |                    |                   |   |                  |                   |   |                  |                     |   |                  |      |   |                  |          |    |                   |         |    |                   |                          |    |                   |                              |    |                   |                  |   |                  |                   |
| 2                                                                                          | return_gi_4_2      | Turning of stomach/cramping/abdo pain                                                                                                              |                                                                                                                                                                                                                                                                                                                                                                                                                                                                                                                                                                                                                                                                                                                                                                                                                                                                                                                                                                                                                                               |   |                    |                                     |   |                    |                                       |   |                    |               |   |                    |                |   |                    |                   |   |                  |                   |   |                  |                     |   |                  |      |   |                  |          |    |                   |         |    |                   |                          |    |                   |                              |    |                   |                  |   |                  |                   |
| 3                                                                                          | return_gi_4_3      | Nausea                                                                                                                                             |                                                                                                                                                                                                                                                                                                                                                                                                                                                                                                                                                                                                                                                                                                                                                                                                                                                                                                                                                                                                                                               |   |                    |                                     |   |                    |                                       |   |                    |               |   |                    |                |   |                    |                   |   |                  |                   |   |                  |                     |   |                  |      |   |                  |          |    |                   |         |    |                   |                          |    |                   |                              |    |                   |                  |   |                  |                   |
| 4                                                                                          | return_gi_4_4      | Vomiting                                                                                                                                           |                                                                                                                                                                                                                                                                                                                                                                                                                                                                                                                                                                                                                                                                                                                                                                                                                                                                                                                                                                                                                                               |   |                    |                                     |   |                    |                                       |   |                    |               |   |                    |                |   |                    |                   |   |                  |                   |   |                  |                     |   |                  |      |   |                  |          |    |                   |         |    |                   |                          |    |                   |                              |    |                   |                  |   |                  |                   |
| 5                                                                                          | return_gi_4_5      | Diarrhea                                                                                                                                           |                                                                                                                                                                                                                                                                                                                                                                                                                                                                                                                                                                                                                                                                                                                                                                                                                                                                                                                                                                                                                                               |   |                    |                                     |   |                    |                                       |   |                    |               |   |                    |                |   |                    |                   |   |                  |                   |   |                  |                     |   |                  |      |   |                  |          |    |                   |         |    |                   |                          |    |                   |                              |    |                   |                  |   |                  |                   |
| 0                                                                                          | return_gi_4_0      | None of the above                                                                                                                                  |                                                                                                                                                                                                                                                                                                                                                                                                                                                                                                                                                                                                                                                                                                                                                                                                                                                                                                                                                                                                                                               |   |                    |                                     |   |                    |                                       |   |                    |               |   |                    |                |   |                    |                   |   |                  |                   |   |                  |                     |   |                  |      |   |                  |          |    |                   |         |    |                   |                          |    |                   |                              |    |                   |                  |   |                  |                   |
| <p><b>1035 return_anxiety_4</b></p> <p>Show the field ONLY if:<br/>[return_wd_4] = '1'</p> |                    | <p><b>Section Header:</b> <i>Return Anxiety 4</i></p> <p><b>Which of the following signs or symptoms of anxiety were documented?</b></p>           | <p><b>checkbox</b></p> <table border="1"> <tr><td>1</td><td>return_anxiety_4_1</td><td>Anxiety, irritability, or agitation</td></tr> <tr><td>2</td><td>return_anxiety_4_2</td><td>Nervousness</td></tr> <tr><td>3</td><td>return_anxiety_4_3</td><td>Tremor</td></tr> <tr><td>4</td><td>return_anxiety_4_4</td><td>Restlessness</td></tr> <tr><td>0</td><td>return_anxiety_4_0</td><td>None of the above</td></tr> </table>                                                                                                                                                                                                                                                                                                                                                                                                                                                                                                                                                                                                                   | 1 | return_anxiety_4_1 | Anxiety, irritability, or agitation | 2 | return_anxiety_4_2 | Nervousness                           | 3 | return_anxiety_4_3 | Tremor        | 4 | return_anxiety_4_4 | Restlessness   | 0 | return_anxiety_4_0 | None of the above |   |                  |                   |   |                  |                     |   |                  |      |   |                  |          |    |                   |         |    |                   |                          |    |                   |                              |    |                   |                  |   |                  |                   |
| 1                                                                                          | return_anxiety_4_1 | Anxiety, irritability, or agitation                                                                                                                |                                                                                                                                                                                                                                                                                                                                                                                                                                                                                                                                                                                                                                                                                                                                                                                                                                                                                                                                                                                                                                               |   |                    |                                     |   |                    |                                       |   |                    |               |   |                    |                |   |                    |                   |   |                  |                   |   |                  |                     |   |                  |      |   |                  |          |    |                   |         |    |                   |                          |    |                   |                              |    |                   |                  |   |                  |                   |
| 2                                                                                          | return_anxiety_4_2 | Nervousness                                                                                                                                        |                                                                                                                                                                                                                                                                                                                                                                                                                                                                                                                                                                                                                                                                                                                                                                                                                                                                                                                                                                                                                                               |   |                    |                                     |   |                    |                                       |   |                    |               |   |                    |                |   |                    |                   |   |                  |                   |   |                  |                     |   |                  |      |   |                  |          |    |                   |         |    |                   |                          |    |                   |                              |    |                   |                  |   |                  |                   |
| 3                                                                                          | return_anxiety_4_3 | Tremor                                                                                                                                             |                                                                                                                                                                                                                                                                                                                                                                                                                                                                                                                                                                                                                                                                                                                                                                                                                                                                                                                                                                                                                                               |   |                    |                                     |   |                    |                                       |   |                    |               |   |                    |                |   |                    |                   |   |                  |                   |   |                  |                     |   |                  |      |   |                  |          |    |                   |         |    |                   |                          |    |                   |                              |    |                   |                  |   |                  |                   |
| 4                                                                                          | return_anxiety_4_4 | Restlessness                                                                                                                                       |                                                                                                                                                                                                                                                                                                                                                                                                                                                                                                                                                                                                                                                                                                                                                                                                                                                                                                                                                                                                                                               |   |                    |                                     |   |                    |                                       |   |                    |               |   |                    |                |   |                    |                   |   |                  |                   |   |                  |                     |   |                  |      |   |                  |          |    |                   |         |    |                   |                          |    |                   |                              |    |                   |                  |   |                  |                   |
| 0                                                                                          | return_anxiety_4_0 | None of the above                                                                                                                                  |                                                                                                                                                                                                                                                                                                                                                                                                                                                                                                                                                                                                                                                                                                                                                                                                                                                                                                                                                                                                                                               |   |                    |                                     |   |                    |                                       |   |                    |               |   |                    |                |   |                    |                   |   |                  |                   |   |                  |                     |   |                  |      |   |                  |          |    |                   |         |    |                   |                          |    |                   |                              |    |                   |                  |   |                  |                   |

|      |                                                                                                                           |                                                                                                                                               |                                                                                                                                                                                                                                                                                                                                                                                                                                                                                                                                                                                                                                                                                                                                                                                                     |   |                       |                          |    |                       |                                    |   |                       |             |   |                       |                        |   |                       |                                           |   |                       |                                             |   |                       |                                                      |   |                       |                   |
|------|---------------------------------------------------------------------------------------------------------------------------|-----------------------------------------------------------------------------------------------------------------------------------------------|-----------------------------------------------------------------------------------------------------------------------------------------------------------------------------------------------------------------------------------------------------------------------------------------------------------------------------------------------------------------------------------------------------------------------------------------------------------------------------------------------------------------------------------------------------------------------------------------------------------------------------------------------------------------------------------------------------------------------------------------------------------------------------------------------------|---|-----------------------|--------------------------|----|-----------------------|------------------------------------|---|-----------------------|-------------|---|-----------------------|------------------------|---|-----------------------|-------------------------------------------|---|-----------------------|---------------------------------------------|---|-----------------------|------------------------------------------------------|---|-----------------------|-------------------|
| 1036 | <b>return_withdrawal_4</b><br><br>Show the field ONLY if:<br>[return_wd_4] = '1'                                          | <b>Section Header: Return Withdrawal 4</b><br><br><b>Which of the following signs or symptoms of withdrawal were documented?</b>              | <b>checkbox</b><br><table border="1"> <tr> <td>1</td> <td>return_withdrawal_4_1</td> <td>Yawning</td> </tr> <tr> <td>2</td> <td>return_withdrawal_4_2</td> <td>Gooseflesh skin (chills/piloerecti</td> </tr> <tr> <td>3</td> <td>return_withdrawal_4_3</td> <td>Pulse &gt; 80</td> </tr> <tr> <td>4</td> <td>return_withdrawal_4_4</td> <td>Sweating (diaphoresis)</td> </tr> <tr> <td>5</td> <td>return_withdrawal_4_5</td> <td>Pupil size larger normal (dilation/mydria</td> </tr> <tr> <td>6</td> <td>return_withdrawal_4_6</td> <td>Bone, jointache body aches (arthralgias/mya</td> </tr> <tr> <td>7</td> <td>return_withdrawal_4_7</td> <td>Runny nose or tearing (rhinorr or lacrimation)</td> </tr> <tr> <td>0</td> <td>return_withdrawal_4_0</td> <td>None of the abo</td> </tr> </table> | 1 | return_withdrawal_4_1 | Yawning                  | 2  | return_withdrawal_4_2 | Gooseflesh skin (chills/piloerecti | 3 | return_withdrawal_4_3 | Pulse > 80  | 4 | return_withdrawal_4_4 | Sweating (diaphoresis) | 5 | return_withdrawal_4_5 | Pupil size larger normal (dilation/mydria | 6 | return_withdrawal_4_6 | Bone, jointache body aches (arthralgias/mya | 7 | return_withdrawal_4_7 | Runny nose or tearing (rhinorr or lacrimation)       | 0 | return_withdrawal_4_0 | None of the abo   |
| 1    | return_withdrawal_4_1                                                                                                     | Yawning                                                                                                                                       |                                                                                                                                                                                                                                                                                                                                                                                                                                                                                                                                                                                                                                                                                                                                                                                                     |   |                       |                          |    |                       |                                    |   |                       |             |   |                       |                        |   |                       |                                           |   |                       |                                             |   |                       |                                                      |   |                       |                   |
| 2    | return_withdrawal_4_2                                                                                                     | Gooseflesh skin (chills/piloerecti                                                                                                            |                                                                                                                                                                                                                                                                                                                                                                                                                                                                                                                                                                                                                                                                                                                                                                                                     |   |                       |                          |    |                       |                                    |   |                       |             |   |                       |                        |   |                       |                                           |   |                       |                                             |   |                       |                                                      |   |                       |                   |
| 3    | return_withdrawal_4_3                                                                                                     | Pulse > 80                                                                                                                                    |                                                                                                                                                                                                                                                                                                                                                                                                                                                                                                                                                                                                                                                                                                                                                                                                     |   |                       |                          |    |                       |                                    |   |                       |             |   |                       |                        |   |                       |                                           |   |                       |                                             |   |                       |                                                      |   |                       |                   |
| 4    | return_withdrawal_4_4                                                                                                     | Sweating (diaphoresis)                                                                                                                        |                                                                                                                                                                                                                                                                                                                                                                                                                                                                                                                                                                                                                                                                                                                                                                                                     |   |                       |                          |    |                       |                                    |   |                       |             |   |                       |                        |   |                       |                                           |   |                       |                                             |   |                       |                                                      |   |                       |                   |
| 5    | return_withdrawal_4_5                                                                                                     | Pupil size larger normal (dilation/mydria                                                                                                     |                                                                                                                                                                                                                                                                                                                                                                                                                                                                                                                                                                                                                                                                                                                                                                                                     |   |                       |                          |    |                       |                                    |   |                       |             |   |                       |                        |   |                       |                                           |   |                       |                                             |   |                       |                                                      |   |                       |                   |
| 6    | return_withdrawal_4_6                                                                                                     | Bone, jointache body aches (arthralgias/mya                                                                                                   |                                                                                                                                                                                                                                                                                                                                                                                                                                                                                                                                                                                                                                                                                                                                                                                                     |   |                       |                          |    |                       |                                    |   |                       |             |   |                       |                        |   |                       |                                           |   |                       |                                             |   |                       |                                                      |   |                       |                   |
| 7    | return_withdrawal_4_7                                                                                                     | Runny nose or tearing (rhinorr or lacrimation)                                                                                                |                                                                                                                                                                                                                                                                                                                                                                                                                                                                                                                                                                                                                                                                                                                                                                                                     |   |                       |                          |    |                       |                                    |   |                       |             |   |                       |                        |   |                       |                                           |   |                       |                                             |   |                       |                                                      |   |                       |                   |
| 0    | return_withdrawal_4_0                                                                                                     | None of the abo                                                                                                                               |                                                                                                                                                                                                                                                                                                                                                                                                                                                                                                                                                                                                                                                                                                                                                                                                     |   |                       |                          |    |                       |                                    |   |                       |             |   |                       |                        |   |                       |                                           |   |                       |                                             |   |                       |                                                      |   |                       |                   |
| 1037 | <b>return_vitals_4</b><br><br>Show the field ONLY if:<br>[return_wd_4] = '1'                                              | <b>Section Header: Return Vitals 4</b><br><br><b>Which of the following abnormal vital signs were documented?</b>                             | <b>checkbox</b><br><table border="1"> <tr> <td>1</td> <td>return_vitals_4_1</td> <td>Hypoxia</td> </tr> <tr> <td>2</td> <td>return_vitals_4_2</td> <td>Hypercarbia</td> </tr> <tr> <td>3</td> <td>return_vitals_4_3</td> <td>Hypotension</td> </tr> <tr> <td>4</td> <td>return_vitals_4_4</td> <td>Bradycardia</td> </tr> <tr> <td>0</td> <td>return_vitals_4_0</td> <td>None of the above</td> </tr> </table>                                                                                                                                                                                                                                                                                                                                                                                      | 1 | return_vitals_4_1     | Hypoxia                  | 2  | return_vitals_4_2     | Hypercarbia                        | 3 | return_vitals_4_3     | Hypotension | 4 | return_vitals_4_4     | Bradycardia            | 0 | return_vitals_4_0     | None of the above                         |   |                       |                                             |   |                       |                                                      |   |                       |                   |
| 1    | return_vitals_4_1                                                                                                         | Hypoxia                                                                                                                                       |                                                                                                                                                                                                                                                                                                                                                                                                                                                                                                                                                                                                                                                                                                                                                                                                     |   |                       |                          |    |                       |                                    |   |                       |             |   |                       |                        |   |                       |                                           |   |                       |                                             |   |                       |                                                      |   |                       |                   |
| 2    | return_vitals_4_2                                                                                                         | Hypercarbia                                                                                                                                   |                                                                                                                                                                                                                                                                                                                                                                                                                                                                                                                                                                                                                                                                                                                                                                                                     |   |                       |                          |    |                       |                                    |   |                       |             |   |                       |                        |   |                       |                                           |   |                       |                                             |   |                       |                                                      |   |                       |                   |
| 3    | return_vitals_4_3                                                                                                         | Hypotension                                                                                                                                   |                                                                                                                                                                                                                                                                                                                                                                                                                                                                                                                                                                                                                                                                                                                                                                                                     |   |                       |                          |    |                       |                                    |   |                       |             |   |                       |                        |   |                       |                                           |   |                       |                                             |   |                       |                                                      |   |                       |                   |
| 4    | return_vitals_4_4                                                                                                         | Bradycardia                                                                                                                                   |                                                                                                                                                                                                                                                                                                                                                                                                                                                                                                                                                                                                                                                                                                                                                                                                     |   |                       |                          |    |                       |                                    |   |                       |             |   |                       |                        |   |                       |                                           |   |                       |                                             |   |                       |                                                      |   |                       |                   |
| 0    | return_vitals_4_0                                                                                                         | None of the above                                                                                                                             |                                                                                                                                                                                                                                                                                                                                                                                                                                                                                                                                                                                                                                                                                                                                                                                                     |   |                       |                          |    |                       |                                    |   |                       |             |   |                       |                        |   |                       |                                           |   |                       |                                             |   |                       |                                                      |   |                       |                   |
| 1038 | <b>return_misc_4</b><br><br>Show the field ONLY if:<br>[return_wd_4] = '1'                                                | <b>Section Header: Return Miscellaneous 4</b><br><br><b>Which of the following miscellaneous opioid related side effects were documented?</b> | <b>checkbox</b><br><table border="1"> <tr> <td>1</td> <td>return_misc_4_1</td> <td>Difficulty passing urine</td> </tr> <tr> <td>2</td> <td>return_misc_4_2</td> <td>Itchiness</td> </tr> <tr> <td>3</td> <td>return_misc_4_3</td> <td>Dry mouth</td> </tr> <tr> <td>4</td> <td>return_misc_4_4</td> <td>Headache</td> </tr> <tr> <td>5</td> <td>return_misc_4_5</td> <td>Unable to walk</td> </tr> <tr> <td>6</td> <td>return_misc_4_6</td> <td>Unable to discharge</td> </tr> <tr> <td>7</td> <td>return_misc_4_7</td> <td>Pupil size smaller than normal (constriction/miosis)</td> </tr> <tr> <td>0</td> <td>return_misc_4_0</td> <td>None of the above</td> </tr> </table>                                                                                                                      | 1 | return_misc_4_1       | Difficulty passing urine | 2  | return_misc_4_2       | Itchiness                          | 3 | return_misc_4_3       | Dry mouth   | 4 | return_misc_4_4       | Headache               | 5 | return_misc_4_5       | Unable to walk                            | 6 | return_misc_4_6       | Unable to discharge                         | 7 | return_misc_4_7       | Pupil size smaller than normal (constriction/miosis) | 0 | return_misc_4_0       | None of the above |
| 1    | return_misc_4_1                                                                                                           | Difficulty passing urine                                                                                                                      |                                                                                                                                                                                                                                                                                                                                                                                                                                                                                                                                                                                                                                                                                                                                                                                                     |   |                       |                          |    |                       |                                    |   |                       |             |   |                       |                        |   |                       |                                           |   |                       |                                             |   |                       |                                                      |   |                       |                   |
| 2    | return_misc_4_2                                                                                                           | Itchiness                                                                                                                                     |                                                                                                                                                                                                                                                                                                                                                                                                                                                                                                                                                                                                                                                                                                                                                                                                     |   |                       |                          |    |                       |                                    |   |                       |             |   |                       |                        |   |                       |                                           |   |                       |                                             |   |                       |                                                      |   |                       |                   |
| 3    | return_misc_4_3                                                                                                           | Dry mouth                                                                                                                                     |                                                                                                                                                                                                                                                                                                                                                                                                                                                                                                                                                                                                                                                                                                                                                                                                     |   |                       |                          |    |                       |                                    |   |                       |             |   |                       |                        |   |                       |                                           |   |                       |                                             |   |                       |                                                      |   |                       |                   |
| 4    | return_misc_4_4                                                                                                           | Headache                                                                                                                                      |                                                                                                                                                                                                                                                                                                                                                                                                                                                                                                                                                                                                                                                                                                                                                                                                     |   |                       |                          |    |                       |                                    |   |                       |             |   |                       |                        |   |                       |                                           |   |                       |                                             |   |                       |                                                      |   |                       |                   |
| 5    | return_misc_4_5                                                                                                           | Unable to walk                                                                                                                                |                                                                                                                                                                                                                                                                                                                                                                                                                                                                                                                                                                                                                                                                                                                                                                                                     |   |                       |                          |    |                       |                                    |   |                       |             |   |                       |                        |   |                       |                                           |   |                       |                                             |   |                       |                                                      |   |                       |                   |
| 6    | return_misc_4_6                                                                                                           | Unable to discharge                                                                                                                           |                                                                                                                                                                                                                                                                                                                                                                                                                                                                                                                                                                                                                                                                                                                                                                                                     |   |                       |                          |    |                       |                                    |   |                       |             |   |                       |                        |   |                       |                                           |   |                       |                                             |   |                       |                                                      |   |                       |                   |
| 7    | return_misc_4_7                                                                                                           | Pupil size smaller than normal (constriction/miosis)                                                                                          |                                                                                                                                                                                                                                                                                                                                                                                                                                                                                                                                                                                                                                                                                                                                                                                                     |   |                       |                          |    |                       |                                    |   |                       |             |   |                       |                        |   |                       |                                           |   |                       |                                             |   |                       |                                                      |   |                       |                   |
| 0    | return_misc_4_0                                                                                                           | None of the above                                                                                                                             |                                                                                                                                                                                                                                                                                                                                                                                                                                                                                                                                                                                                                                                                                                                                                                                                     |   |                       |                          |    |                       |                                    |   |                       |             |   |                       |                        |   |                       |                                           |   |                       |                                             |   |                       |                                                      |   |                       |                   |
| 1039 | <b>datetime_return_5</b><br><br>Show the field ONLY if:<br>[return_num] = '5' or [return_num] = '6' or [return_num] = '7' | <b>Section Header: Fifth Return Visit</b><br><br><b>Date and time of arrival</b>                                                              | <b>text (datetime_mdy)</b>                                                                                                                                                                                                                                                                                                                                                                                                                                                                                                                                                                                                                                                                                                                                                                          |   |                       |                          |    |                       |                                    |   |                       |             |   |                       |                        |   |                       |                                           |   |                       |                                             |   |                       |                                                      |   |                       |                   |
| 1040 | <b>return_redcap_5</b><br><br>Show the field ONLY if:<br>[return_num] = '5' or [return_num] = '6' or [return_num] = '7'   | <b>Does this encounter coincide with an existing visit in REDCap?</b>                                                                         | <b>yesno</b><br><table border="1"> <tr> <td>1</td> <td>Yes</td> </tr> <tr> <td>0</td> <td>No</td> </tr> </table>                                                                                                                                                                                                                                                                                                                                                                                                                                                                                                                                                                                                                                                                                    | 1 | Yes                   | 0                        | No |                       |                                    |   |                       |             |   |                       |                        |   |                       |                                           |   |                       |                                             |   |                       |                                                      |   |                       |                   |
| 1    | Yes                                                                                                                       |                                                                                                                                               |                                                                                                                                                                                                                                                                                                                                                                                                                                                                                                                                                                                                                                                                                                                                                                                                     |   |                       |                          |    |                       |                                    |   |                       |             |   |                       |                        |   |                       |                                           |   |                       |                                             |   |                       |                                                      |   |                       |                   |
| 0    | No                                                                                                                        |                                                                                                                                               |                                                                                                                                                                                                                                                                                                                                                                                                                                                                                                                                                                                                                                                                                                                                                                                                     |   |                       |                          |    |                       |                                    |   |                       |             |   |                       |                        |   |                       |                                           |   |                       |                                             |   |                       |                                                      |   |                       |                   |

|      |                                                                                                                  |                                                                                                        |                                                                                                                                                                                                                                                                                                                                                                                                                                                                                                                                                                                                                                                                                                                                                                                                                                                                                                                 |   |                      |                                   |    |                      |          |   |                      |         |   |                      |          |   |                      |                                   |   |                      |     |   |                      |            |   |                      |         |   |                      |         |    |                       |                 |    |                       |                         |
|------|------------------------------------------------------------------------------------------------------------------|--------------------------------------------------------------------------------------------------------|-----------------------------------------------------------------------------------------------------------------------------------------------------------------------------------------------------------------------------------------------------------------------------------------------------------------------------------------------------------------------------------------------------------------------------------------------------------------------------------------------------------------------------------------------------------------------------------------------------------------------------------------------------------------------------------------------------------------------------------------------------------------------------------------------------------------------------------------------------------------------------------------------------------------|---|----------------------|-----------------------------------|----|----------------------|----------|---|----------------------|---------|---|----------------------|----------|---|----------------------|-----------------------------------|---|----------------------|-----|---|----------------------|------------|---|----------------------|---------|---|----------------------|---------|----|-----------------------|-----------------|----|-----------------------|-------------------------|
| 1041 | return_redcap_spec_5<br>Show the field ONLY if:<br>[return_redcap_5] = '1'                                       | Please enter the visit number                                                                          | text                                                                                                                                                                                                                                                                                                                                                                                                                                                                                                                                                                                                                                                                                                                                                                                                                                                                                                            |   |                      |                                   |    |                      |          |   |                      |         |   |                      |          |   |                      |                                   |   |                      |     |   |                      |            |   |                      |         |   |                      |         |    |                       |                 |    |                       |                         |
| 1042 | return_od_5<br>Show the field ONLY if:<br>[return_num] = '5' or [return_num] = '6' or [return_num] = '7'         | Did the patient present to the ED for opioid overdose?                                                 | yesno<br><table border="1"> <tr> <td>1</td> <td>Yes</td> </tr> <tr> <td>0</td> <td>No</td> </tr> </table>                                                                                                                                                                                                                                                                                                                                                                                                                                                                                                                                                                                                                                                                                                                                                                                                       | 1 | Yes                  | 0                                 | No |                      |          |   |                      |         |   |                      |          |   |                      |                                   |   |                      |     |   |                      |            |   |                      |         |   |                      |         |    |                       |                 |    |                       |                         |
| 1    | Yes                                                                                                              |                                                                                                        |                                                                                                                                                                                                                                                                                                                                                                                                                                                                                                                                                                                                                                                                                                                                                                                                                                                                                                                 |   |                      |                                   |    |                      |          |   |                      |         |   |                      |          |   |                      |                                   |   |                      |     |   |                      |            |   |                      |         |   |                      |         |    |                       |                 |    |                       |                         |
| 0    | No                                                                                                               |                                                                                                        |                                                                                                                                                                                                                                                                                                                                                                                                                                                                                                                                                                                                                                                                                                                                                                                                                                                                                                                 |   |                      |                                   |    |                      |          |   |                      |         |   |                      |          |   |                      |                                   |   |                      |     |   |                      |            |   |                      |         |   |                      |         |    |                       |                 |    |                       |                         |
| 1043 | return_illicit_yn_5<br>Show the field ONLY if:<br>[return_num] = '5' or [return_num] = '6' or [return_num] = '7' | Did the patient or provider report any substance use between the index ED visit and this return visit? | yesno<br><table border="1"> <tr> <td>1</td> <td>Yes</td> </tr> <tr> <td>0</td> <td>No</td> </tr> </table>                                                                                                                                                                                                                                                                                                                                                                                                                                                                                                                                                                                                                                                                                                                                                                                                       | 1 | Yes                  | 0                                 | No |                      |          |   |                      |         |   |                      |          |   |                      |                                   |   |                      |     |   |                      |            |   |                      |         |   |                      |         |    |                       |                 |    |                       |                         |
| 1    | Yes                                                                                                              |                                                                                                        |                                                                                                                                                                                                                                                                                                                                                                                                                                                                                                                                                                                                                                                                                                                                                                                                                                                                                                                 |   |                      |                                   |    |                      |          |   |                      |         |   |                      |          |   |                      |                                   |   |                      |     |   |                      |            |   |                      |         |   |                      |         |    |                       |                 |    |                       |                         |
| 0    | No                                                                                                               |                                                                                                        |                                                                                                                                                                                                                                                                                                                                                                                                                                                                                                                                                                                                                                                                                                                                                                                                                                                                                                                 |   |                      |                                   |    |                      |          |   |                      |         |   |                      |          |   |                      |                                   |   |                      |     |   |                      |            |   |                      |         |   |                      |         |    |                       |                 |    |                       |                         |
| 1044 | return_substance_5<br>Show the field ONLY if:<br>[return_illicit_yn_5] = '1'                                     | Which substance(s) did the patient use?                                                                | checkbox<br><table border="1"> <tr> <td>1</td> <td>return_substance_5_1</td> <td>Opioids (not including buprenorph</td> </tr> <tr> <td>2</td> <td>return_substance_5_2</td> <td>Methamph</td> </tr> <tr> <td>3</td> <td>return_substance_5_3</td> <td>Cocaine</td> </tr> <tr> <td>4</td> <td>return_substance_5_4</td> <td>Cannabis</td> </tr> <tr> <td>5</td> <td>return_substance_5_5</td> <td>Hallucinoge (including Ecstasy/MD</td> </tr> <tr> <td>6</td> <td>return_substance_5_6</td> <td>LSD</td> </tr> <tr> <td>7</td> <td>return_substance_5_7</td> <td>Benzodiaze</td> </tr> <tr> <td>8</td> <td>return_substance_5_8</td> <td>Alcohol</td> </tr> <tr> <td>9</td> <td>return_substance_5_9</td> <td>Tobacco</td> </tr> <tr> <td>10</td> <td>return_substance_5_10</td> <td>Other stimu NOS</td> </tr> <tr> <td>11</td> <td>return_substance_5_11</td> <td>Other (note heavy usage</td> </tr> </table> | 1 | return_substance_5_1 | Opioids (not including buprenorph | 2  | return_substance_5_2 | Methamph | 3 | return_substance_5_3 | Cocaine | 4 | return_substance_5_4 | Cannabis | 5 | return_substance_5_5 | Hallucinoge (including Ecstasy/MD | 6 | return_substance_5_6 | LSD | 7 | return_substance_5_7 | Benzodiaze | 8 | return_substance_5_8 | Alcohol | 9 | return_substance_5_9 | Tobacco | 10 | return_substance_5_10 | Other stimu NOS | 11 | return_substance_5_11 | Other (note heavy usage |
| 1    | return_substance_5_1                                                                                             | Opioids (not including buprenorph                                                                      |                                                                                                                                                                                                                                                                                                                                                                                                                                                                                                                                                                                                                                                                                                                                                                                                                                                                                                                 |   |                      |                                   |    |                      |          |   |                      |         |   |                      |          |   |                      |                                   |   |                      |     |   |                      |            |   |                      |         |   |                      |         |    |                       |                 |    |                       |                         |
| 2    | return_substance_5_2                                                                                             | Methamph                                                                                               |                                                                                                                                                                                                                                                                                                                                                                                                                                                                                                                                                                                                                                                                                                                                                                                                                                                                                                                 |   |                      |                                   |    |                      |          |   |                      |         |   |                      |          |   |                      |                                   |   |                      |     |   |                      |            |   |                      |         |   |                      |         |    |                       |                 |    |                       |                         |
| 3    | return_substance_5_3                                                                                             | Cocaine                                                                                                |                                                                                                                                                                                                                                                                                                                                                                                                                                                                                                                                                                                                                                                                                                                                                                                                                                                                                                                 |   |                      |                                   |    |                      |          |   |                      |         |   |                      |          |   |                      |                                   |   |                      |     |   |                      |            |   |                      |         |   |                      |         |    |                       |                 |    |                       |                         |
| 4    | return_substance_5_4                                                                                             | Cannabis                                                                                               |                                                                                                                                                                                                                                                                                                                                                                                                                                                                                                                                                                                                                                                                                                                                                                                                                                                                                                                 |   |                      |                                   |    |                      |          |   |                      |         |   |                      |          |   |                      |                                   |   |                      |     |   |                      |            |   |                      |         |   |                      |         |    |                       |                 |    |                       |                         |
| 5    | return_substance_5_5                                                                                             | Hallucinoge (including Ecstasy/MD                                                                      |                                                                                                                                                                                                                                                                                                                                                                                                                                                                                                                                                                                                                                                                                                                                                                                                                                                                                                                 |   |                      |                                   |    |                      |          |   |                      |         |   |                      |          |   |                      |                                   |   |                      |     |   |                      |            |   |                      |         |   |                      |         |    |                       |                 |    |                       |                         |
| 6    | return_substance_5_6                                                                                             | LSD                                                                                                    |                                                                                                                                                                                                                                                                                                                                                                                                                                                                                                                                                                                                                                                                                                                                                                                                                                                                                                                 |   |                      |                                   |    |                      |          |   |                      |         |   |                      |          |   |                      |                                   |   |                      |     |   |                      |            |   |                      |         |   |                      |         |    |                       |                 |    |                       |                         |
| 7    | return_substance_5_7                                                                                             | Benzodiaze                                                                                             |                                                                                                                                                                                                                                                                                                                                                                                                                                                                                                                                                                                                                                                                                                                                                                                                                                                                                                                 |   |                      |                                   |    |                      |          |   |                      |         |   |                      |          |   |                      |                                   |   |                      |     |   |                      |            |   |                      |         |   |                      |         |    |                       |                 |    |                       |                         |
| 8    | return_substance_5_8                                                                                             | Alcohol                                                                                                |                                                                                                                                                                                                                                                                                                                                                                                                                                                                                                                                                                                                                                                                                                                                                                                                                                                                                                                 |   |                      |                                   |    |                      |          |   |                      |         |   |                      |          |   |                      |                                   |   |                      |     |   |                      |            |   |                      |         |   |                      |         |    |                       |                 |    |                       |                         |
| 9    | return_substance_5_9                                                                                             | Tobacco                                                                                                |                                                                                                                                                                                                                                                                                                                                                                                                                                                                                                                                                                                                                                                                                                                                                                                                                                                                                                                 |   |                      |                                   |    |                      |          |   |                      |         |   |                      |          |   |                      |                                   |   |                      |     |   |                      |            |   |                      |         |   |                      |         |    |                       |                 |    |                       |                         |
| 10   | return_substance_5_10                                                                                            | Other stimu NOS                                                                                        |                                                                                                                                                                                                                                                                                                                                                                                                                                                                                                                                                                                                                                                                                                                                                                                                                                                                                                                 |   |                      |                                   |    |                      |          |   |                      |         |   |                      |          |   |                      |                                   |   |                      |     |   |                      |            |   |                      |         |   |                      |         |    |                       |                 |    |                       |                         |
| 11   | return_substance_5_11                                                                                            | Other (note heavy usage                                                                                |                                                                                                                                                                                                                                                                                                                                                                                                                                                                                                                                                                                                                                                                                                                                                                                                                                                                                                                 |   |                      |                                   |    |                      |          |   |                      |         |   |                      |          |   |                      |                                   |   |                      |     |   |                      |            |   |                      |         |   |                      |         |    |                       |                 |    |                       |                         |
| 1045 | return_substance_oth_5<br>Show the field ONLY if:<br>[return_substance_5(11)] = '1'                              | If "Other," please specify.                                                                            | 999 return_substance_5_999 None of the text                                                                                                                                                                                                                                                                                                                                                                                                                                                                                                                                                                                                                                                                                                                                                                                                                                                                     |   |                      |                                   |    |                      |          |   |                      |         |   |                      |          |   |                      |                                   |   |                      |     |   |                      |            |   |                      |         |   |                      |         |    |                       |                 |    |                       |                         |

|      |                                                                                                                              |                                                                                       |                                                                                                                                                                                                                                                                                                                                                                                                                                                                                                                                                                                                                                                                                                                                                                                                                                                                                                                                                                                                                    |   |                      |           |    |                      |                                       |   |                      |                                    |   |                      |                              |   |                      |                          |   |                      |           |   |                      |         |   |                      |              |   |                      |           |    |                       |             |    |                       |           |    |                       |           |    |                       |       |
|------|------------------------------------------------------------------------------------------------------------------------------|---------------------------------------------------------------------------------------|--------------------------------------------------------------------------------------------------------------------------------------------------------------------------------------------------------------------------------------------------------------------------------------------------------------------------------------------------------------------------------------------------------------------------------------------------------------------------------------------------------------------------------------------------------------------------------------------------------------------------------------------------------------------------------------------------------------------------------------------------------------------------------------------------------------------------------------------------------------------------------------------------------------------------------------------------------------------------------------------------------------------|---|----------------------|-----------|----|----------------------|---------------------------------------|---|----------------------|------------------------------------|---|----------------------|------------------------------|---|----------------------|--------------------------|---|----------------------|-----------|---|----------------------|---------|---|----------------------|--------------|---|----------------------|-----------|----|-----------------------|-------------|----|-----------------------|-----------|----|-----------------------|-----------|----|-----------------------|-------|
| 1046 | <b>return_opioid_5</b><br><br><b>Show the field ONLY if:</b><br>[return_substance_5(1)]<br>= '1'                             | <b>Which opioid(s) did the patient use?</b>                                           | <b>checkbox</b><br><table border="1"> <tr> <td>1</td> <td>return_opioid_5_1</td> <td>Heroin</td> </tr> <tr> <td>2</td> <td>return_opioid_5_2</td> <td>Oxycodone (OxyContin, Percocet, etc.)</td> </tr> <tr> <td>3</td> <td>return_opioid_5_3</td> <td>Hydrocodone (Norco, Vicodin, etc.)</td> </tr> <tr> <td>4</td> <td>return_opioid_5_4</td> <td>Fentanyl (Duragesic, Ionsys)</td> </tr> <tr> <td>5</td> <td>return_opioid_5_5</td> <td>Hydromorphone (Dilaudid)</td> </tr> <tr> <td>6</td> <td>return_opioid_5_6</td> <td>Morphine</td> </tr> <tr> <td>7</td> <td>return_opioid_5_7</td> <td>Other</td> </tr> </table>                                                                                                                                                                                                                                                                                                                                                                                          | 1 | return_opioid_5_1    | Heroin    | 2  | return_opioid_5_2    | Oxycodone (OxyContin, Percocet, etc.) | 3 | return_opioid_5_3    | Hydrocodone (Norco, Vicodin, etc.) | 4 | return_opioid_5_4    | Fentanyl (Duragesic, Ionsys) | 5 | return_opioid_5_5    | Hydromorphone (Dilaudid) | 6 | return_opioid_5_6    | Morphine  | 7 | return_opioid_5_7    | Other   |   |                      |              |   |                      |           |    |                       |             |    |                       |           |    |                       |           |    |                       |       |
| 1    | return_opioid_5_1                                                                                                            | Heroin                                                                                |                                                                                                                                                                                                                                                                                                                                                                                                                                                                                                                                                                                                                                                                                                                                                                                                                                                                                                                                                                                                                    |   |                      |           |    |                      |                                       |   |                      |                                    |   |                      |                              |   |                      |                          |   |                      |           |   |                      |         |   |                      |              |   |                      |           |    |                       |             |    |                       |           |    |                       |           |    |                       |       |
| 2    | return_opioid_5_2                                                                                                            | Oxycodone (OxyContin, Percocet, etc.)                                                 |                                                                                                                                                                                                                                                                                                                                                                                                                                                                                                                                                                                                                                                                                                                                                                                                                                                                                                                                                                                                                    |   |                      |           |    |                      |                                       |   |                      |                                    |   |                      |                              |   |                      |                          |   |                      |           |   |                      |         |   |                      |              |   |                      |           |    |                       |             |    |                       |           |    |                       |           |    |                       |       |
| 3    | return_opioid_5_3                                                                                                            | Hydrocodone (Norco, Vicodin, etc.)                                                    |                                                                                                                                                                                                                                                                                                                                                                                                                                                                                                                                                                                                                                                                                                                                                                                                                                                                                                                                                                                                                    |   |                      |           |    |                      |                                       |   |                      |                                    |   |                      |                              |   |                      |                          |   |                      |           |   |                      |         |   |                      |              |   |                      |           |    |                       |             |    |                       |           |    |                       |           |    |                       |       |
| 4    | return_opioid_5_4                                                                                                            | Fentanyl (Duragesic, Ionsys)                                                          |                                                                                                                                                                                                                                                                                                                                                                                                                                                                                                                                                                                                                                                                                                                                                                                                                                                                                                                                                                                                                    |   |                      |           |    |                      |                                       |   |                      |                                    |   |                      |                              |   |                      |                          |   |                      |           |   |                      |         |   |                      |              |   |                      |           |    |                       |             |    |                       |           |    |                       |           |    |                       |       |
| 5    | return_opioid_5_5                                                                                                            | Hydromorphone (Dilaudid)                                                              |                                                                                                                                                                                                                                                                                                                                                                                                                                                                                                                                                                                                                                                                                                                                                                                                                                                                                                                                                                                                                    |   |                      |           |    |                      |                                       |   |                      |                                    |   |                      |                              |   |                      |                          |   |                      |           |   |                      |         |   |                      |              |   |                      |           |    |                       |             |    |                       |           |    |                       |           |    |                       |       |
| 6    | return_opioid_5_6                                                                                                            | Morphine                                                                              |                                                                                                                                                                                                                                                                                                                                                                                                                                                                                                                                                                                                                                                                                                                                                                                                                                                                                                                                                                                                                    |   |                      |           |    |                      |                                       |   |                      |                                    |   |                      |                              |   |                      |                          |   |                      |           |   |                      |         |   |                      |              |   |                      |           |    |                       |             |    |                       |           |    |                       |           |    |                       |       |
| 7    | return_opioid_5_7                                                                                                            | Other                                                                                 |                                                                                                                                                                                                                                                                                                                                                                                                                                                                                                                                                                                                                                                                                                                                                                                                                                                                                                                                                                                                                    |   |                      |           |    |                      |                                       |   |                      |                                    |   |                      |                              |   |                      |                          |   |                      |           |   |                      |         |   |                      |              |   |                      |           |    |                       |             |    |                       |           |    |                       |           |    |                       |       |
| 1047 | <b>return_opioid_oth_5</b><br><br><b>Show the field ONLY if:</b><br>[return_opioid_5(7)] = '1'                               | <b>If "Other," please specify.</b>                                                    | <b>text</b>                                                                                                                                                                                                                                                                                                                                                                                                                                                                                                                                                                                                                                                                                                                                                                                                                                                                                                                                                                                                        |   |                      |           |    |                      |                                       |   |                      |                                    |   |                      |                              |   |                      |                          |   |                      |           |   |                      |         |   |                      |              |   |                      |           |    |                       |             |    |                       |           |    |                       |           |    |                       |       |
| 1048 | <b>return_utox_5</b><br><br><b>Show the field ONLY if:</b><br>[return_num] = '5' or [return_num] = '6' or [return_num] = '7' | <b>Was a urine toxicology screen performed for this visit?</b>                        | <b>yesno</b><br><table border="1"> <tr> <td>1</td> <td>Yes</td> </tr> <tr> <td>0</td> <td>No</td> </tr> </table>                                                                                                                                                                                                                                                                                                                                                                                                                                                                                                                                                                                                                                                                                                                                                                                                                                                                                                   | 1 | Yes                  | 0         | No |                      |                                       |   |                      |                                    |   |                      |                              |   |                      |                          |   |                      |           |   |                      |         |   |                      |              |   |                      |           |    |                       |             |    |                       |           |    |                       |           |    |                       |       |
| 1    | Yes                                                                                                                          |                                                                                       |                                                                                                                                                                                                                                                                                                                                                                                                                                                                                                                                                                                                                                                                                                                                                                                                                                                                                                                                                                                                                    |   |                      |           |    |                      |                                       |   |                      |                                    |   |                      |                              |   |                      |                          |   |                      |           |   |                      |         |   |                      |              |   |                      |           |    |                       |             |    |                       |           |    |                       |           |    |                       |       |
| 0    | No                                                                                                                           |                                                                                       |                                                                                                                                                                                                                                                                                                                                                                                                                                                                                                                                                                                                                                                                                                                                                                                                                                                                                                                                                                                                                    |   |                      |           |    |                      |                                       |   |                      |                                    |   |                      |                              |   |                      |                          |   |                      |           |   |                      |         |   |                      |              |   |                      |           |    |                       |             |    |                       |           |    |                       |           |    |                       |       |
| 1049 | <b>return_utox_spec_5</b><br><br><b>Show the field ONLY if:</b><br>[return_utox_5] = '1'                                     | <b>Please select all drugs shown to be positive in the urine toxicology analysis:</b> | <b>checkbox</b><br><table border="1"> <tr> <td>1</td> <td>return_utox_spec_5_1</td> <td>Amphetami</td> </tr> <tr> <td>2</td> <td>return_utox_spec_5_2</td> <td>Barbiturates</td> </tr> <tr> <td>3</td> <td>return_utox_spec_5_3</td> <td>Cocaine</td> </tr> <tr> <td>4</td> <td>return_utox_spec_5_4</td> <td>Methaqualo</td> </tr> <tr> <td>5</td> <td>return_utox_spec_5_5</td> <td>Methadone</td> </tr> <tr> <td>6</td> <td>return_utox_spec_5_6</td> <td>Methamphe</td> </tr> <tr> <td>7</td> <td>return_utox_spec_5_7</td> <td>Opiates</td> </tr> <tr> <td>8</td> <td>return_utox_spec_5_8</td> <td>Phencyclidin</td> </tr> <tr> <td>9</td> <td>return_utox_spec_5_9</td> <td>Marijuana</td> </tr> <tr> <td>10</td> <td>return_utox_spec_5_10</td> <td>Benzodiazep</td> </tr> <tr> <td>11</td> <td>return_utox_spec_5_11</td> <td>Propoxyph</td> </tr> <tr> <td>12</td> <td>return_utox_spec_5_12</td> <td>Amphetami</td> </tr> <tr> <td>13</td> <td>return_utox_spec_5_13</td> <td>Other</td> </tr> </table> | 1 | return_utox_spec_5_1 | Amphetami | 2  | return_utox_spec_5_2 | Barbiturates                          | 3 | return_utox_spec_5_3 | Cocaine                            | 4 | return_utox_spec_5_4 | Methaqualo                   | 5 | return_utox_spec_5_5 | Methadone                | 6 | return_utox_spec_5_6 | Methamphe | 7 | return_utox_spec_5_7 | Opiates | 8 | return_utox_spec_5_8 | Phencyclidin | 9 | return_utox_spec_5_9 | Marijuana | 10 | return_utox_spec_5_10 | Benzodiazep | 11 | return_utox_spec_5_11 | Propoxyph | 12 | return_utox_spec_5_12 | Amphetami | 13 | return_utox_spec_5_13 | Other |
| 1    | return_utox_spec_5_1                                                                                                         | Amphetami                                                                             |                                                                                                                                                                                                                                                                                                                                                                                                                                                                                                                                                                                                                                                                                                                                                                                                                                                                                                                                                                                                                    |   |                      |           |    |                      |                                       |   |                      |                                    |   |                      |                              |   |                      |                          |   |                      |           |   |                      |         |   |                      |              |   |                      |           |    |                       |             |    |                       |           |    |                       |           |    |                       |       |
| 2    | return_utox_spec_5_2                                                                                                         | Barbiturates                                                                          |                                                                                                                                                                                                                                                                                                                                                                                                                                                                                                                                                                                                                                                                                                                                                                                                                                                                                                                                                                                                                    |   |                      |           |    |                      |                                       |   |                      |                                    |   |                      |                              |   |                      |                          |   |                      |           |   |                      |         |   |                      |              |   |                      |           |    |                       |             |    |                       |           |    |                       |           |    |                       |       |
| 3    | return_utox_spec_5_3                                                                                                         | Cocaine                                                                               |                                                                                                                                                                                                                                                                                                                                                                                                                                                                                                                                                                                                                                                                                                                                                                                                                                                                                                                                                                                                                    |   |                      |           |    |                      |                                       |   |                      |                                    |   |                      |                              |   |                      |                          |   |                      |           |   |                      |         |   |                      |              |   |                      |           |    |                       |             |    |                       |           |    |                       |           |    |                       |       |
| 4    | return_utox_spec_5_4                                                                                                         | Methaqualo                                                                            |                                                                                                                                                                                                                                                                                                                                                                                                                                                                                                                                                                                                                                                                                                                                                                                                                                                                                                                                                                                                                    |   |                      |           |    |                      |                                       |   |                      |                                    |   |                      |                              |   |                      |                          |   |                      |           |   |                      |         |   |                      |              |   |                      |           |    |                       |             |    |                       |           |    |                       |           |    |                       |       |
| 5    | return_utox_spec_5_5                                                                                                         | Methadone                                                                             |                                                                                                                                                                                                                                                                                                                                                                                                                                                                                                                                                                                                                                                                                                                                                                                                                                                                                                                                                                                                                    |   |                      |           |    |                      |                                       |   |                      |                                    |   |                      |                              |   |                      |                          |   |                      |           |   |                      |         |   |                      |              |   |                      |           |    |                       |             |    |                       |           |    |                       |           |    |                       |       |
| 6    | return_utox_spec_5_6                                                                                                         | Methamphe                                                                             |                                                                                                                                                                                                                                                                                                                                                                                                                                                                                                                                                                                                                                                                                                                                                                                                                                                                                                                                                                                                                    |   |                      |           |    |                      |                                       |   |                      |                                    |   |                      |                              |   |                      |                          |   |                      |           |   |                      |         |   |                      |              |   |                      |           |    |                       |             |    |                       |           |    |                       |           |    |                       |       |
| 7    | return_utox_spec_5_7                                                                                                         | Opiates                                                                               |                                                                                                                                                                                                                                                                                                                                                                                                                                                                                                                                                                                                                                                                                                                                                                                                                                                                                                                                                                                                                    |   |                      |           |    |                      |                                       |   |                      |                                    |   |                      |                              |   |                      |                          |   |                      |           |   |                      |         |   |                      |              |   |                      |           |    |                       |             |    |                       |           |    |                       |           |    |                       |       |
| 8    | return_utox_spec_5_8                                                                                                         | Phencyclidin                                                                          |                                                                                                                                                                                                                                                                                                                                                                                                                                                                                                                                                                                                                                                                                                                                                                                                                                                                                                                                                                                                                    |   |                      |           |    |                      |                                       |   |                      |                                    |   |                      |                              |   |                      |                          |   |                      |           |   |                      |         |   |                      |              |   |                      |           |    |                       |             |    |                       |           |    |                       |           |    |                       |       |
| 9    | return_utox_spec_5_9                                                                                                         | Marijuana                                                                             |                                                                                                                                                                                                                                                                                                                                                                                                                                                                                                                                                                                                                                                                                                                                                                                                                                                                                                                                                                                                                    |   |                      |           |    |                      |                                       |   |                      |                                    |   |                      |                              |   |                      |                          |   |                      |           |   |                      |         |   |                      |              |   |                      |           |    |                       |             |    |                       |           |    |                       |           |    |                       |       |
| 10   | return_utox_spec_5_10                                                                                                        | Benzodiazep                                                                           |                                                                                                                                                                                                                                                                                                                                                                                                                                                                                                                                                                                                                                                                                                                                                                                                                                                                                                                                                                                                                    |   |                      |           |    |                      |                                       |   |                      |                                    |   |                      |                              |   |                      |                          |   |                      |           |   |                      |         |   |                      |              |   |                      |           |    |                       |             |    |                       |           |    |                       |           |    |                       |       |
| 11   | return_utox_spec_5_11                                                                                                        | Propoxyph                                                                             |                                                                                                                                                                                                                                                                                                                                                                                                                                                                                                                                                                                                                                                                                                                                                                                                                                                                                                                                                                                                                    |   |                      |           |    |                      |                                       |   |                      |                                    |   |                      |                              |   |                      |                          |   |                      |           |   |                      |         |   |                      |              |   |                      |           |    |                       |             |    |                       |           |    |                       |           |    |                       |       |
| 12   | return_utox_spec_5_12                                                                                                        | Amphetami                                                                             |                                                                                                                                                                                                                                                                                                                                                                                                                                                                                                                                                                                                                                                                                                                                                                                                                                                                                                                                                                                                                    |   |                      |           |    |                      |                                       |   |                      |                                    |   |                      |                              |   |                      |                          |   |                      |           |   |                      |         |   |                      |              |   |                      |           |    |                       |             |    |                       |           |    |                       |           |    |                       |       |
| 13   | return_utox_spec_5_13                                                                                                        | Other                                                                                 |                                                                                                                                                                                                                                                                                                                                                                                                                                                                                                                                                                                                                                                                                                                                                                                                                                                                                                                                                                                                                    |   |                      |           |    |                      |                                       |   |                      |                                    |   |                      |                              |   |                      |                          |   |                      |           |   |                      |         |   |                      |              |   |                      |           |    |                       |             |    |                       |           |    |                       |           |    |                       |       |
| 1050 | <b>return_utox_oth_5</b><br><br><b>Show the field ONLY if:</b><br>[return_utox_spec_5(13)] = '1'                             | <b>If "Other," please specify</b>                                                     | <b>999 return_utox_spec_5_999 None of the</b><br><br><b>text</b>                                                                                                                                                                                                                                                                                                                                                                                                                                                                                                                                                                                                                                                                                                                                                                                                                                                                                                                                                   |   |                      |           |    |                      |                                       |   |                      |                                    |   |                      |                              |   |                      |                          |   |                      |           |   |                      |         |   |                      |              |   |                      |           |    |                       |             |    |                       |           |    |                       |           |    |                       |       |



|      |                                                                                                                                 |                                                                                                                                                                                                                                                            |                                                                                                                                                                                                                                                                                                                                                                                                                                                                                                                                                                                                                                                                                                                                                                                                                                                                                                                                                                                                                                                                                                                                  |   |                     |           |    |                     |                                          |   |                     |                                         |   |                     |                   |   |                  |      |   |                  |         |   |                  |                     |   |                  |      |   |                  |          |    |                   |         |    |                   |                          |    |                   |                              |    |                   |                  |   |                  |                   |
|------|---------------------------------------------------------------------------------------------------------------------------------|------------------------------------------------------------------------------------------------------------------------------------------------------------------------------------------------------------------------------------------------------------|----------------------------------------------------------------------------------------------------------------------------------------------------------------------------------------------------------------------------------------------------------------------------------------------------------------------------------------------------------------------------------------------------------------------------------------------------------------------------------------------------------------------------------------------------------------------------------------------------------------------------------------------------------------------------------------------------------------------------------------------------------------------------------------------------------------------------------------------------------------------------------------------------------------------------------------------------------------------------------------------------------------------------------------------------------------------------------------------------------------------------------|---|---------------------|-----------|----|---------------------|------------------------------------------|---|---------------------|-----------------------------------------|---|---------------------|-------------------|---|------------------|------|---|------------------|---------|---|------------------|---------------------|---|------------------|------|---|------------------|----------|----|-------------------|---------|----|-------------------|--------------------------|----|-------------------|------------------------------|----|-------------------|------------------|---|------------------|-------------------|
| 1051 | <b>return_craving_5</b><br><br><b>Show the field ONLY if:</b><br>[return_num] = '5' or [return_num] = '6' or [return_num] = '7' | <b>Did the patient or provider mention opioid cravings during the visit?</b>                                                                                                                                                                               | <b>yesno</b><br><table border="1" data-bbox="1047 100 1140 199"> <tr> <td>1</td> <td>Yes</td> </tr> <tr> <td>0</td> <td>No</td> </tr> </table>                                                                                                                                                                                                                                                                                                                                                                                                                                                                                                                                                                                                                                                                                                                                                                                                                                                                                                                                                                                   | 1 | Yes                 | 0         | No |                     |                                          |   |                     |                                         |   |                     |                   |   |                  |      |   |                  |         |   |                  |                     |   |                  |      |   |                  |          |    |                   |         |    |                   |                          |    |                   |                              |    |                   |                  |   |                  |                   |
| 1    | Yes                                                                                                                             |                                                                                                                                                                                                                                                            |                                                                                                                                                                                                                                                                                                                                                                                                                                                                                                                                                                                                                                                                                                                                                                                                                                                                                                                                                                                                                                                                                                                                  |   |                     |           |    |                     |                                          |   |                     |                                         |   |                     |                   |   |                  |      |   |                  |         |   |                  |                     |   |                  |      |   |                  |          |    |                   |         |    |                   |                          |    |                   |                              |    |                   |                  |   |                  |                   |
| 0    | No                                                                                                                              |                                                                                                                                                                                                                                                            |                                                                                                                                                                                                                                                                                                                                                                                                                                                                                                                                                                                                                                                                                                                                                                                                                                                                                                                                                                                                                                                                                                                                  |   |                     |           |    |                     |                                          |   |                     |                                         |   |                     |                   |   |                  |      |   |                  |         |   |                  |                     |   |                  |      |   |                  |          |    |                   |         |    |                   |                          |    |                   |                              |    |                   |                  |   |                  |                   |
| 1052 | <b>return_wd_5</b><br><br><b>Show the field ONLY if:</b><br>[return_num] = '5' or [return_num] = '6' or [return_num] = '7'      | <b>Did the patient complaint about or exhibit any signs or symptoms of withdrawal during this visit?</b><br><br><i>If the patient received buprenorphine during this visit, only select signs/symptoms documented BEFORE buprenorphine administration.</i> | <b>yesno</b><br><table border="1" data-bbox="1047 294 1140 392"> <tr> <td>1</td> <td>Yes</td> </tr> <tr> <td>0</td> <td>No</td> </tr> </table>                                                                                                                                                                                                                                                                                                                                                                                                                                                                                                                                                                                                                                                                                                                                                                                                                                                                                                                                                                                   | 1 | Yes                 | 0         | No |                     |                                          |   |                     |                                         |   |                     |                   |   |                  |      |   |                  |         |   |                  |                     |   |                  |      |   |                  |          |    |                   |         |    |                   |                          |    |                   |                              |    |                   |                  |   |                  |                   |
| 1    | Yes                                                                                                                             |                                                                                                                                                                                                                                                            |                                                                                                                                                                                                                                                                                                                                                                                                                                                                                                                                                                                                                                                                                                                                                                                                                                                                                                                                                                                                                                                                                                                                  |   |                     |           |    |                     |                                          |   |                     |                                         |   |                     |                   |   |                  |      |   |                  |         |   |                  |                     |   |                  |      |   |                  |          |    |                   |         |    |                   |                          |    |                   |                              |    |                   |                  |   |                  |                   |
| 0    | No                                                                                                                              |                                                                                                                                                                                                                                                            |                                                                                                                                                                                                                                                                                                                                                                                                                                                                                                                                                                                                                                                                                                                                                                                                                                                                                                                                                                                                                                                                                                                                  |   |                     |           |    |                     |                                          |   |                     |                                         |   |                     |                   |   |                  |      |   |                  |         |   |                  |                     |   |                  |      |   |                  |          |    |                   |         |    |                   |                          |    |                   |                              |    |                   |                  |   |                  |                   |
| 1053 | <b>return_sedation_5</b><br><br><b>Show the field ONLY if:</b><br>[return_wd_5] = '1'                                           | <b>Section Header: Return Sedation 5</b><br><br><b>Which of the following signs or symptoms of sedation were documented?</b>                                                                                                                               | <b>checkbox</b><br><table border="1" data-bbox="1047 487 1526 871"> <tr> <td>1</td> <td>return_sedation_5_1</td> <td>Nodding</td> </tr> <tr> <td>2</td> <td>return_sedation_5_2</td> <td>Sleepy, drowsy, difficulty staying awake</td> </tr> <tr> <td>3</td> <td>return_sedation_5_3</td> <td>Feelings of general fatigue or weakness</td> </tr> <tr> <td>0</td> <td>return_sedation_5_0</td> <td>None of the above</td> </tr> </table>                                                                                                                                                                                                                                                                                                                                                                                                                                                                                                                                                                                                                                                                                          | 1 | return_sedation_5_1 | Nodding   | 2  | return_sedation_5_2 | Sleepy, drowsy, difficulty staying awake | 3 | return_sedation_5_3 | Feelings of general fatigue or weakness | 0 | return_sedation_5_0 | None of the above |   |                  |      |   |                  |         |   |                  |                     |   |                  |      |   |                  |          |    |                   |         |    |                   |                          |    |                   |                              |    |                   |                  |   |                  |                   |
| 1    | return_sedation_5_1                                                                                                             | Nodding                                                                                                                                                                                                                                                    |                                                                                                                                                                                                                                                                                                                                                                                                                                                                                                                                                                                                                                                                                                                                                                                                                                                                                                                                                                                                                                                                                                                                  |   |                     |           |    |                     |                                          |   |                     |                                         |   |                     |                   |   |                  |      |   |                  |         |   |                  |                     |   |                  |      |   |                  |          |    |                   |         |    |                   |                          |    |                   |                              |    |                   |                  |   |                  |                   |
| 2    | return_sedation_5_2                                                                                                             | Sleepy, drowsy, difficulty staying awake                                                                                                                                                                                                                   |                                                                                                                                                                                                                                                                                                                                                                                                                                                                                                                                                                                                                                                                                                                                                                                                                                                                                                                                                                                                                                                                                                                                  |   |                     |           |    |                     |                                          |   |                     |                                         |   |                     |                   |   |                  |      |   |                  |         |   |                  |                     |   |                  |      |   |                  |          |    |                   |         |    |                   |                          |    |                   |                              |    |                   |                  |   |                  |                   |
| 3    | return_sedation_5_3                                                                                                             | Feelings of general fatigue or weakness                                                                                                                                                                                                                    |                                                                                                                                                                                                                                                                                                                                                                                                                                                                                                                                                                                                                                                                                                                                                                                                                                                                                                                                                                                                                                                                                                                                  |   |                     |           |    |                     |                                          |   |                     |                                         |   |                     |                   |   |                  |      |   |                  |         |   |                  |                     |   |                  |      |   |                  |          |    |                   |         |    |                   |                          |    |                   |                              |    |                   |                  |   |                  |                   |
| 0    | return_sedation_5_0                                                                                                             | None of the above                                                                                                                                                                                                                                          |                                                                                                                                                                                                                                                                                                                                                                                                                                                                                                                                                                                                                                                                                                                                                                                                                                                                                                                                                                                                                                                                                                                                  |   |                     |           |    |                     |                                          |   |                     |                                         |   |                     |                   |   |                  |      |   |                  |         |   |                  |                     |   |                  |      |   |                  |          |    |                   |         |    |                   |                          |    |                   |                              |    |                   |                  |   |                  |                   |
| 1054 | <b>return_intox_5</b><br><br><b>Show the field ONLY if:</b><br>[return_wd_5] = '1'                                              | <b>Section Header: Return Intoxication 5</b><br><br><b>Which of the following signs or symptoms of intoxication were documented?</b>                                                                                                                       | <b>checkbox</b><br><table border="1" data-bbox="1047 924 1526 1816"> <tr> <td>1</td> <td>return_intox_5_1</td> <td>Good mood</td> </tr> <tr> <td>2</td> <td>return_intox_5_2</td> <td>Coasting (Spaced out)</td> </tr> <tr> <td>3</td> <td>return_intox_5_3</td> <td>Pleasant Sick</td> </tr> <tr> <td>4</td> <td>return_intox_5_4</td> <td>Drive (energy)</td> </tr> <tr> <td>5</td> <td>return_intox_5_5</td> <td>High</td> </tr> <tr> <td>6</td> <td>return_intox_5_6</td> <td>Drunken</td> </tr> <tr> <td>7</td> <td>return_intox_5_7</td> <td>Soapbox (talkative)</td> </tr> <tr> <td>8</td> <td>return_intox_5_8</td> <td>Rush</td> </tr> <tr> <td>9</td> <td>return_intox_5_9</td> <td>Friendly</td> </tr> <tr> <td>10</td> <td>return_intox_5_10</td> <td>Relaxed</td> </tr> <tr> <td>11</td> <td>return_intox_5_11</td> <td>Difficulty concentrating</td> </tr> <tr> <td>12</td> <td>return_intox_5_12</td> <td>Feeling lightheaded or dizzy</td> </tr> <tr> <td>13</td> <td>return_intox_5_13</td> <td>Feeling confused</td> </tr> <tr> <td>0</td> <td>return_intox_5_0</td> <td>None of the above</td> </tr> </table> | 1 | return_intox_5_1    | Good mood | 2  | return_intox_5_2    | Coasting (Spaced out)                    | 3 | return_intox_5_3    | Pleasant Sick                           | 4 | return_intox_5_4    | Drive (energy)    | 5 | return_intox_5_5 | High | 6 | return_intox_5_6 | Drunken | 7 | return_intox_5_7 | Soapbox (talkative) | 8 | return_intox_5_8 | Rush | 9 | return_intox_5_9 | Friendly | 10 | return_intox_5_10 | Relaxed | 11 | return_intox_5_11 | Difficulty concentrating | 12 | return_intox_5_12 | Feeling lightheaded or dizzy | 13 | return_intox_5_13 | Feeling confused | 0 | return_intox_5_0 | None of the above |
| 1    | return_intox_5_1                                                                                                                | Good mood                                                                                                                                                                                                                                                  |                                                                                                                                                                                                                                                                                                                                                                                                                                                                                                                                                                                                                                                                                                                                                                                                                                                                                                                                                                                                                                                                                                                                  |   |                     |           |    |                     |                                          |   |                     |                                         |   |                     |                   |   |                  |      |   |                  |         |   |                  |                     |   |                  |      |   |                  |          |    |                   |         |    |                   |                          |    |                   |                              |    |                   |                  |   |                  |                   |
| 2    | return_intox_5_2                                                                                                                | Coasting (Spaced out)                                                                                                                                                                                                                                      |                                                                                                                                                                                                                                                                                                                                                                                                                                                                                                                                                                                                                                                                                                                                                                                                                                                                                                                                                                                                                                                                                                                                  |   |                     |           |    |                     |                                          |   |                     |                                         |   |                     |                   |   |                  |      |   |                  |         |   |                  |                     |   |                  |      |   |                  |          |    |                   |         |    |                   |                          |    |                   |                              |    |                   |                  |   |                  |                   |
| 3    | return_intox_5_3                                                                                                                | Pleasant Sick                                                                                                                                                                                                                                              |                                                                                                                                                                                                                                                                                                                                                                                                                                                                                                                                                                                                                                                                                                                                                                                                                                                                                                                                                                                                                                                                                                                                  |   |                     |           |    |                     |                                          |   |                     |                                         |   |                     |                   |   |                  |      |   |                  |         |   |                  |                     |   |                  |      |   |                  |          |    |                   |         |    |                   |                          |    |                   |                              |    |                   |                  |   |                  |                   |
| 4    | return_intox_5_4                                                                                                                | Drive (energy)                                                                                                                                                                                                                                             |                                                                                                                                                                                                                                                                                                                                                                                                                                                                                                                                                                                                                                                                                                                                                                                                                                                                                                                                                                                                                                                                                                                                  |   |                     |           |    |                     |                                          |   |                     |                                         |   |                     |                   |   |                  |      |   |                  |         |   |                  |                     |   |                  |      |   |                  |          |    |                   |         |    |                   |                          |    |                   |                              |    |                   |                  |   |                  |                   |
| 5    | return_intox_5_5                                                                                                                | High                                                                                                                                                                                                                                                       |                                                                                                                                                                                                                                                                                                                                                                                                                                                                                                                                                                                                                                                                                                                                                                                                                                                                                                                                                                                                                                                                                                                                  |   |                     |           |    |                     |                                          |   |                     |                                         |   |                     |                   |   |                  |      |   |                  |         |   |                  |                     |   |                  |      |   |                  |          |    |                   |         |    |                   |                          |    |                   |                              |    |                   |                  |   |                  |                   |
| 6    | return_intox_5_6                                                                                                                | Drunken                                                                                                                                                                                                                                                    |                                                                                                                                                                                                                                                                                                                                                                                                                                                                                                                                                                                                                                                                                                                                                                                                                                                                                                                                                                                                                                                                                                                                  |   |                     |           |    |                     |                                          |   |                     |                                         |   |                     |                   |   |                  |      |   |                  |         |   |                  |                     |   |                  |      |   |                  |          |    |                   |         |    |                   |                          |    |                   |                              |    |                   |                  |   |                  |                   |
| 7    | return_intox_5_7                                                                                                                | Soapbox (talkative)                                                                                                                                                                                                                                        |                                                                                                                                                                                                                                                                                                                                                                                                                                                                                                                                                                                                                                                                                                                                                                                                                                                                                                                                                                                                                                                                                                                                  |   |                     |           |    |                     |                                          |   |                     |                                         |   |                     |                   |   |                  |      |   |                  |         |   |                  |                     |   |                  |      |   |                  |          |    |                   |         |    |                   |                          |    |                   |                              |    |                   |                  |   |                  |                   |
| 8    | return_intox_5_8                                                                                                                | Rush                                                                                                                                                                                                                                                       |                                                                                                                                                                                                                                                                                                                                                                                                                                                                                                                                                                                                                                                                                                                                                                                                                                                                                                                                                                                                                                                                                                                                  |   |                     |           |    |                     |                                          |   |                     |                                         |   |                     |                   |   |                  |      |   |                  |         |   |                  |                     |   |                  |      |   |                  |          |    |                   |         |    |                   |                          |    |                   |                              |    |                   |                  |   |                  |                   |
| 9    | return_intox_5_9                                                                                                                | Friendly                                                                                                                                                                                                                                                   |                                                                                                                                                                                                                                                                                                                                                                                                                                                                                                                                                                                                                                                                                                                                                                                                                                                                                                                                                                                                                                                                                                                                  |   |                     |           |    |                     |                                          |   |                     |                                         |   |                     |                   |   |                  |      |   |                  |         |   |                  |                     |   |                  |      |   |                  |          |    |                   |         |    |                   |                          |    |                   |                              |    |                   |                  |   |                  |                   |
| 10   | return_intox_5_10                                                                                                               | Relaxed                                                                                                                                                                                                                                                    |                                                                                                                                                                                                                                                                                                                                                                                                                                                                                                                                                                                                                                                                                                                                                                                                                                                                                                                                                                                                                                                                                                                                  |   |                     |           |    |                     |                                          |   |                     |                                         |   |                     |                   |   |                  |      |   |                  |         |   |                  |                     |   |                  |      |   |                  |          |    |                   |         |    |                   |                          |    |                   |                              |    |                   |                  |   |                  |                   |
| 11   | return_intox_5_11                                                                                                               | Difficulty concentrating                                                                                                                                                                                                                                   |                                                                                                                                                                                                                                                                                                                                                                                                                                                                                                                                                                                                                                                                                                                                                                                                                                                                                                                                                                                                                                                                                                                                  |   |                     |           |    |                     |                                          |   |                     |                                         |   |                     |                   |   |                  |      |   |                  |         |   |                  |                     |   |                  |      |   |                  |          |    |                   |         |    |                   |                          |    |                   |                              |    |                   |                  |   |                  |                   |
| 12   | return_intox_5_12                                                                                                               | Feeling lightheaded or dizzy                                                                                                                                                                                                                               |                                                                                                                                                                                                                                                                                                                                                                                                                                                                                                                                                                                                                                                                                                                                                                                                                                                                                                                                                                                                                                                                                                                                  |   |                     |           |    |                     |                                          |   |                     |                                         |   |                     |                   |   |                  |      |   |                  |         |   |                  |                     |   |                  |      |   |                  |          |    |                   |         |    |                   |                          |    |                   |                              |    |                   |                  |   |                  |                   |
| 13   | return_intox_5_13                                                                                                               | Feeling confused                                                                                                                                                                                                                                           |                                                                                                                                                                                                                                                                                                                                                                                                                                                                                                                                                                                                                                                                                                                                                                                                                                                                                                                                                                                                                                                                                                                                  |   |                     |           |    |                     |                                          |   |                     |                                         |   |                     |                   |   |                  |      |   |                  |         |   |                  |                     |   |                  |      |   |                  |          |    |                   |         |    |                   |                          |    |                   |                              |    |                   |                  |   |                  |                   |
| 0    | return_intox_5_0                                                                                                                | None of the above                                                                                                                                                                                                                                          |                                                                                                                                                                                                                                                                                                                                                                                                                                                                                                                                                                                                                                                                                                                                                                                                                                                                                                                                                                                                                                                                                                                                  |   |                     |           |    |                     |                                          |   |                     |                                         |   |                     |                   |   |                  |      |   |                  |         |   |                  |                     |   |                  |      |   |                  |          |    |                   |         |    |                   |                          |    |                   |                              |    |                   |                  |   |                  |                   |

|                                                                                               |                                                                                                                                         |                                                                                                                                                                                                                                                                                                                                                                                                                                                                                                                                                                                                                                                                                                                                                                                                         |   |                       |                                     |   |                       |                                       |   |                       |             |   |                       |                        |   |                       |                                           |   |                       |                                             |   |                       |                                                |   |                       |                 |
|-----------------------------------------------------------------------------------------------|-----------------------------------------------------------------------------------------------------------------------------------------|---------------------------------------------------------------------------------------------------------------------------------------------------------------------------------------------------------------------------------------------------------------------------------------------------------------------------------------------------------------------------------------------------------------------------------------------------------------------------------------------------------------------------------------------------------------------------------------------------------------------------------------------------------------------------------------------------------------------------------------------------------------------------------------------------------|---|-----------------------|-------------------------------------|---|-----------------------|---------------------------------------|---|-----------------------|-------------|---|-----------------------|------------------------|---|-----------------------|-------------------------------------------|---|-----------------------|---------------------------------------------|---|-----------------------|------------------------------------------------|---|-----------------------|-----------------|
| <p><b>1055 return_gi_5</b></p> <p>Show the field ONLY if:<br/>[return_wd_5] = '1'</p>         | <p><b>Section Header: Return GI 5</b></p> <p><b>Which of the following gastrointestinal signs or symptoms were documented?</b></p>      | <p><b>checkbox</b></p> <table border="1"> <tr> <td>1</td> <td>return_gi_5_1</td> <td>Constipation</td> </tr> <tr> <td>2</td> <td>return_gi_5_2</td> <td>Turning of stomach/cramping/abdo pain</td> </tr> <tr> <td>3</td> <td>return_gi_5_3</td> <td>Nausea</td> </tr> <tr> <td>4</td> <td>return_gi_5_4</td> <td>Vomiting</td> </tr> <tr> <td>5</td> <td>return_gi_5_5</td> <td>Diarrhea</td> </tr> <tr> <td>0</td> <td>return_gi_5_0</td> <td>None of the above</td> </tr> </table>                                                                                                                                                                                                                                                                                                                    | 1 | return_gi_5_1         | Constipation                        | 2 | return_gi_5_2         | Turning of stomach/cramping/abdo pain | 3 | return_gi_5_3         | Nausea      | 4 | return_gi_5_4         | Vomiting               | 5 | return_gi_5_5         | Diarrhea                                  | 0 | return_gi_5_0         | None of the above                           |   |                       |                                                |   |                       |                 |
| 1                                                                                             | return_gi_5_1                                                                                                                           | Constipation                                                                                                                                                                                                                                                                                                                                                                                                                                                                                                                                                                                                                                                                                                                                                                                            |   |                       |                                     |   |                       |                                       |   |                       |             |   |                       |                        |   |                       |                                           |   |                       |                                             |   |                       |                                                |   |                       |                 |
| 2                                                                                             | return_gi_5_2                                                                                                                           | Turning of stomach/cramping/abdo pain                                                                                                                                                                                                                                                                                                                                                                                                                                                                                                                                                                                                                                                                                                                                                                   |   |                       |                                     |   |                       |                                       |   |                       |             |   |                       |                        |   |                       |                                           |   |                       |                                             |   |                       |                                                |   |                       |                 |
| 3                                                                                             | return_gi_5_3                                                                                                                           | Nausea                                                                                                                                                                                                                                                                                                                                                                                                                                                                                                                                                                                                                                                                                                                                                                                                  |   |                       |                                     |   |                       |                                       |   |                       |             |   |                       |                        |   |                       |                                           |   |                       |                                             |   |                       |                                                |   |                       |                 |
| 4                                                                                             | return_gi_5_4                                                                                                                           | Vomiting                                                                                                                                                                                                                                                                                                                                                                                                                                                                                                                                                                                                                                                                                                                                                                                                |   |                       |                                     |   |                       |                                       |   |                       |             |   |                       |                        |   |                       |                                           |   |                       |                                             |   |                       |                                                |   |                       |                 |
| 5                                                                                             | return_gi_5_5                                                                                                                           | Diarrhea                                                                                                                                                                                                                                                                                                                                                                                                                                                                                                                                                                                                                                                                                                                                                                                                |   |                       |                                     |   |                       |                                       |   |                       |             |   |                       |                        |   |                       |                                           |   |                       |                                             |   |                       |                                                |   |                       |                 |
| 0                                                                                             | return_gi_5_0                                                                                                                           | None of the above                                                                                                                                                                                                                                                                                                                                                                                                                                                                                                                                                                                                                                                                                                                                                                                       |   |                       |                                     |   |                       |                                       |   |                       |             |   |                       |                        |   |                       |                                           |   |                       |                                             |   |                       |                                                |   |                       |                 |
| <p><b>1056 return_anxiety_5</b></p> <p>Show the field ONLY if:<br/>[return_wd_5] = '1'</p>    | <p><b>Section Header: Return Anxiety 5</b></p> <p><b>Which of the following signs or symptoms of anxiety were documented?</b></p>       | <p><b>checkbox</b></p> <table border="1"> <tr> <td>1</td> <td>return_anxiety_5_1</td> <td>Anxiety, irritability, or agitation</td> </tr> <tr> <td>2</td> <td>return_anxiety_5_2</td> <td>Nervousness</td> </tr> <tr> <td>3</td> <td>return_anxiety_5_3</td> <td>Tremor</td> </tr> <tr> <td>4</td> <td>return_anxiety_5_4</td> <td>Restlessness</td> </tr> <tr> <td>0</td> <td>return_anxiety_5_0</td> <td>None of the above</td> </tr> </table>                                                                                                                                                                                                                                                                                                                                                         | 1 | return_anxiety_5_1    | Anxiety, irritability, or agitation | 2 | return_anxiety_5_2    | Nervousness                           | 3 | return_anxiety_5_3    | Tremor      | 4 | return_anxiety_5_4    | Restlessness           | 0 | return_anxiety_5_0    | None of the above                         |   |                       |                                             |   |                       |                                                |   |                       |                 |
| 1                                                                                             | return_anxiety_5_1                                                                                                                      | Anxiety, irritability, or agitation                                                                                                                                                                                                                                                                                                                                                                                                                                                                                                                                                                                                                                                                                                                                                                     |   |                       |                                     |   |                       |                                       |   |                       |             |   |                       |                        |   |                       |                                           |   |                       |                                             |   |                       |                                                |   |                       |                 |
| 2                                                                                             | return_anxiety_5_2                                                                                                                      | Nervousness                                                                                                                                                                                                                                                                                                                                                                                                                                                                                                                                                                                                                                                                                                                                                                                             |   |                       |                                     |   |                       |                                       |   |                       |             |   |                       |                        |   |                       |                                           |   |                       |                                             |   |                       |                                                |   |                       |                 |
| 3                                                                                             | return_anxiety_5_3                                                                                                                      | Tremor                                                                                                                                                                                                                                                                                                                                                                                                                                                                                                                                                                                                                                                                                                                                                                                                  |   |                       |                                     |   |                       |                                       |   |                       |             |   |                       |                        |   |                       |                                           |   |                       |                                             |   |                       |                                                |   |                       |                 |
| 4                                                                                             | return_anxiety_5_4                                                                                                                      | Restlessness                                                                                                                                                                                                                                                                                                                                                                                                                                                                                                                                                                                                                                                                                                                                                                                            |   |                       |                                     |   |                       |                                       |   |                       |             |   |                       |                        |   |                       |                                           |   |                       |                                             |   |                       |                                                |   |                       |                 |
| 0                                                                                             | return_anxiety_5_0                                                                                                                      | None of the above                                                                                                                                                                                                                                                                                                                                                                                                                                                                                                                                                                                                                                                                                                                                                                                       |   |                       |                                     |   |                       |                                       |   |                       |             |   |                       |                        |   |                       |                                           |   |                       |                                             |   |                       |                                                |   |                       |                 |
| <p><b>1057 return_withdrawal_5</b></p> <p>Show the field ONLY if:<br/>[return_wd_5] = '1'</p> | <p><b>Section Header: Return Withdrawal 5</b></p> <p><b>Which of the following signs or symptoms of withdrawal were documented?</b></p> | <p><b>checkbox</b></p> <table border="1"> <tr> <td>1</td> <td>return_withdrawal_5_1</td> <td>Yawning</td> </tr> <tr> <td>2</td> <td>return_withdrawal_5_2</td> <td>Gooseflesh skin (chills/piloerecti</td> </tr> <tr> <td>3</td> <td>return_withdrawal_5_3</td> <td>Pulse &gt; 80</td> </tr> <tr> <td>4</td> <td>return_withdrawal_5_4</td> <td>Sweating (diaphoresis)</td> </tr> <tr> <td>5</td> <td>return_withdrawal_5_5</td> <td>Pupil size larger normal (dilation/mydria</td> </tr> <tr> <td>6</td> <td>return_withdrawal_5_6</td> <td>Bone, jointache body aches (arthralgias/mya</td> </tr> <tr> <td>7</td> <td>return_withdrawal_5_7</td> <td>Runny nose or tearing (rhinorr or lacrimation)</td> </tr> <tr> <td>0</td> <td>return_withdrawal_5_0</td> <td>None of the abo</td> </tr> </table> | 1 | return_withdrawal_5_1 | Yawning                             | 2 | return_withdrawal_5_2 | Gooseflesh skin (chills/piloerecti    | 3 | return_withdrawal_5_3 | Pulse > 80  | 4 | return_withdrawal_5_4 | Sweating (diaphoresis) | 5 | return_withdrawal_5_5 | Pupil size larger normal (dilation/mydria | 6 | return_withdrawal_5_6 | Bone, jointache body aches (arthralgias/mya | 7 | return_withdrawal_5_7 | Runny nose or tearing (rhinorr or lacrimation) | 0 | return_withdrawal_5_0 | None of the abo |
| 1                                                                                             | return_withdrawal_5_1                                                                                                                   | Yawning                                                                                                                                                                                                                                                                                                                                                                                                                                                                                                                                                                                                                                                                                                                                                                                                 |   |                       |                                     |   |                       |                                       |   |                       |             |   |                       |                        |   |                       |                                           |   |                       |                                             |   |                       |                                                |   |                       |                 |
| 2                                                                                             | return_withdrawal_5_2                                                                                                                   | Gooseflesh skin (chills/piloerecti                                                                                                                                                                                                                                                                                                                                                                                                                                                                                                                                                                                                                                                                                                                                                                      |   |                       |                                     |   |                       |                                       |   |                       |             |   |                       |                        |   |                       |                                           |   |                       |                                             |   |                       |                                                |   |                       |                 |
| 3                                                                                             | return_withdrawal_5_3                                                                                                                   | Pulse > 80                                                                                                                                                                                                                                                                                                                                                                                                                                                                                                                                                                                                                                                                                                                                                                                              |   |                       |                                     |   |                       |                                       |   |                       |             |   |                       |                        |   |                       |                                           |   |                       |                                             |   |                       |                                                |   |                       |                 |
| 4                                                                                             | return_withdrawal_5_4                                                                                                                   | Sweating (diaphoresis)                                                                                                                                                                                                                                                                                                                                                                                                                                                                                                                                                                                                                                                                                                                                                                                  |   |                       |                                     |   |                       |                                       |   |                       |             |   |                       |                        |   |                       |                                           |   |                       |                                             |   |                       |                                                |   |                       |                 |
| 5                                                                                             | return_withdrawal_5_5                                                                                                                   | Pupil size larger normal (dilation/mydria                                                                                                                                                                                                                                                                                                                                                                                                                                                                                                                                                                                                                                                                                                                                                               |   |                       |                                     |   |                       |                                       |   |                       |             |   |                       |                        |   |                       |                                           |   |                       |                                             |   |                       |                                                |   |                       |                 |
| 6                                                                                             | return_withdrawal_5_6                                                                                                                   | Bone, jointache body aches (arthralgias/mya                                                                                                                                                                                                                                                                                                                                                                                                                                                                                                                                                                                                                                                                                                                                                             |   |                       |                                     |   |                       |                                       |   |                       |             |   |                       |                        |   |                       |                                           |   |                       |                                             |   |                       |                                                |   |                       |                 |
| 7                                                                                             | return_withdrawal_5_7                                                                                                                   | Runny nose or tearing (rhinorr or lacrimation)                                                                                                                                                                                                                                                                                                                                                                                                                                                                                                                                                                                                                                                                                                                                                          |   |                       |                                     |   |                       |                                       |   |                       |             |   |                       |                        |   |                       |                                           |   |                       |                                             |   |                       |                                                |   |                       |                 |
| 0                                                                                             | return_withdrawal_5_0                                                                                                                   | None of the abo                                                                                                                                                                                                                                                                                                                                                                                                                                                                                                                                                                                                                                                                                                                                                                                         |   |                       |                                     |   |                       |                                       |   |                       |             |   |                       |                        |   |                       |                                           |   |                       |                                             |   |                       |                                                |   |                       |                 |
| <p><b>1058 return_vitals_5</b></p> <p>Show the field ONLY if:<br/>[return_wd_5] = '1'</p>     | <p><b>Section Header: Return Abnormal Vitals 5</b></p> <p><b>Which of the following abnormal vital signs were documented?</b></p>       | <p><b>checkbox</b></p> <table border="1"> <tr> <td>1</td> <td>return_vitals_5_1</td> <td>Hypoxia</td> </tr> <tr> <td>2</td> <td>return_vitals_5_2</td> <td>Hypercarbia</td> </tr> <tr> <td>3</td> <td>return_vitals_5_3</td> <td>Hypotension</td> </tr> <tr> <td>4</td> <td>return_vitals_5_4</td> <td>Bradycardia</td> </tr> <tr> <td>0</td> <td>return_vitals_5_0</td> <td>None of the above</td> </tr> </table>                                                                                                                                                                                                                                                                                                                                                                                      | 1 | return_vitals_5_1     | Hypoxia                             | 2 | return_vitals_5_2     | Hypercarbia                           | 3 | return_vitals_5_3     | Hypotension | 4 | return_vitals_5_4     | Bradycardia            | 0 | return_vitals_5_0     | None of the above                         |   |                       |                                             |   |                       |                                                |   |                       |                 |
| 1                                                                                             | return_vitals_5_1                                                                                                                       | Hypoxia                                                                                                                                                                                                                                                                                                                                                                                                                                                                                                                                                                                                                                                                                                                                                                                                 |   |                       |                                     |   |                       |                                       |   |                       |             |   |                       |                        |   |                       |                                           |   |                       |                                             |   |                       |                                                |   |                       |                 |
| 2                                                                                             | return_vitals_5_2                                                                                                                       | Hypercarbia                                                                                                                                                                                                                                                                                                                                                                                                                                                                                                                                                                                                                                                                                                                                                                                             |   |                       |                                     |   |                       |                                       |   |                       |             |   |                       |                        |   |                       |                                           |   |                       |                                             |   |                       |                                                |   |                       |                 |
| 3                                                                                             | return_vitals_5_3                                                                                                                       | Hypotension                                                                                                                                                                                                                                                                                                                                                                                                                                                                                                                                                                                                                                                                                                                                                                                             |   |                       |                                     |   |                       |                                       |   |                       |             |   |                       |                        |   |                       |                                           |   |                       |                                             |   |                       |                                                |   |                       |                 |
| 4                                                                                             | return_vitals_5_4                                                                                                                       | Bradycardia                                                                                                                                                                                                                                                                                                                                                                                                                                                                                                                                                                                                                                                                                                                                                                                             |   |                       |                                     |   |                       |                                       |   |                       |             |   |                       |                        |   |                       |                                           |   |                       |                                             |   |                       |                                                |   |                       |                 |
| 0                                                                                             | return_vitals_5_0                                                                                                                       | None of the above                                                                                                                                                                                                                                                                                                                                                                                                                                                                                                                                                                                                                                                                                                                                                                                       |   |                       |                                     |   |                       |                                       |   |                       |             |   |                       |                        |   |                       |                                           |   |                       |                                             |   |                       |                                                |   |                       |                 |

|      |                                                                                                              |                                                                                                                                               |                                                                                                                                                                                                                                                                                                                                                                                                                                                                                                                                                                                                                                                                                                              |   |                 |                          |    |                 |           |   |                 |           |   |                 |          |   |                 |                |   |                 |                     |   |                 |                                                      |   |                 |                   |
|------|--------------------------------------------------------------------------------------------------------------|-----------------------------------------------------------------------------------------------------------------------------------------------|--------------------------------------------------------------------------------------------------------------------------------------------------------------------------------------------------------------------------------------------------------------------------------------------------------------------------------------------------------------------------------------------------------------------------------------------------------------------------------------------------------------------------------------------------------------------------------------------------------------------------------------------------------------------------------------------------------------|---|-----------------|--------------------------|----|-----------------|-----------|---|-----------------|-----------|---|-----------------|----------|---|-----------------|----------------|---|-----------------|---------------------|---|-----------------|------------------------------------------------------|---|-----------------|-------------------|
| 1059 | <b>return_misc_5</b><br><br><b>Show the field ONLY if:</b><br>[return_wd_5] = '1'                            | <b>Section Header: Return Miscellaneous 5</b><br><br><b>Which of the following miscellaneous opioid related side effects were documented?</b> | <b>checkbox</b><br><table border="1" data-bbox="1047 113 1533 596"> <tr> <td>1</td> <td>return_misc_5_1</td> <td>Difficulty passing urine</td> </tr> <tr> <td>2</td> <td>return_misc_5_2</td> <td>Itchiness</td> </tr> <tr> <td>3</td> <td>return_misc_5_3</td> <td>Dry mouth</td> </tr> <tr> <td>4</td> <td>return_misc_5_4</td> <td>Headache</td> </tr> <tr> <td>5</td> <td>return_misc_5_5</td> <td>Unable to walk</td> </tr> <tr> <td>6</td> <td>return_misc_5_6</td> <td>Unable to discharge</td> </tr> <tr> <td>7</td> <td>return_misc_5_7</td> <td>Pupil size smaller than normal (constriction/miosis)</td> </tr> <tr> <td>0</td> <td>return_misc_5_0</td> <td>None of the above</td> </tr> </table> | 1 | return_misc_5_1 | Difficulty passing urine | 2  | return_misc_5_2 | Itchiness | 3 | return_misc_5_3 | Dry mouth | 4 | return_misc_5_4 | Headache | 5 | return_misc_5_5 | Unable to walk | 6 | return_misc_5_6 | Unable to discharge | 7 | return_misc_5_7 | Pupil size smaller than normal (constriction/miosis) | 0 | return_misc_5_0 | None of the above |
| 1    | return_misc_5_1                                                                                              | Difficulty passing urine                                                                                                                      |                                                                                                                                                                                                                                                                                                                                                                                                                                                                                                                                                                                                                                                                                                              |   |                 |                          |    |                 |           |   |                 |           |   |                 |          |   |                 |                |   |                 |                     |   |                 |                                                      |   |                 |                   |
| 2    | return_misc_5_2                                                                                              | Itchiness                                                                                                                                     |                                                                                                                                                                                                                                                                                                                                                                                                                                                                                                                                                                                                                                                                                                              |   |                 |                          |    |                 |           |   |                 |           |   |                 |          |   |                 |                |   |                 |                     |   |                 |                                                      |   |                 |                   |
| 3    | return_misc_5_3                                                                                              | Dry mouth                                                                                                                                     |                                                                                                                                                                                                                                                                                                                                                                                                                                                                                                                                                                                                                                                                                                              |   |                 |                          |    |                 |           |   |                 |           |   |                 |          |   |                 |                |   |                 |                     |   |                 |                                                      |   |                 |                   |
| 4    | return_misc_5_4                                                                                              | Headache                                                                                                                                      |                                                                                                                                                                                                                                                                                                                                                                                                                                                                                                                                                                                                                                                                                                              |   |                 |                          |    |                 |           |   |                 |           |   |                 |          |   |                 |                |   |                 |                     |   |                 |                                                      |   |                 |                   |
| 5    | return_misc_5_5                                                                                              | Unable to walk                                                                                                                                |                                                                                                                                                                                                                                                                                                                                                                                                                                                                                                                                                                                                                                                                                                              |   |                 |                          |    |                 |           |   |                 |           |   |                 |          |   |                 |                |   |                 |                     |   |                 |                                                      |   |                 |                   |
| 6    | return_misc_5_6                                                                                              | Unable to discharge                                                                                                                           |                                                                                                                                                                                                                                                                                                                                                                                                                                                                                                                                                                                                                                                                                                              |   |                 |                          |    |                 |           |   |                 |           |   |                 |          |   |                 |                |   |                 |                     |   |                 |                                                      |   |                 |                   |
| 7    | return_misc_5_7                                                                                              | Pupil size smaller than normal (constriction/miosis)                                                                                          |                                                                                                                                                                                                                                                                                                                                                                                                                                                                                                                                                                                                                                                                                                              |   |                 |                          |    |                 |           |   |                 |           |   |                 |          |   |                 |                |   |                 |                     |   |                 |                                                      |   |                 |                   |
| 0    | return_misc_5_0                                                                                              | None of the above                                                                                                                             |                                                                                                                                                                                                                                                                                                                                                                                                                                                                                                                                                                                                                                                                                                              |   |                 |                          |    |                 |           |   |                 |           |   |                 |          |   |                 |                |   |                 |                     |   |                 |                                                      |   |                 |                   |
| 1060 | <b>datetime_return_6</b><br><br><b>Show the field ONLY if:</b><br>[return_num] = '6' or [return_num] = '7'   | <b>Section Header: Sixth Return Visit</b><br><br><b>Date and time of arrival</b>                                                              | <b>text (datetime_mdy)</b>                                                                                                                                                                                                                                                                                                                                                                                                                                                                                                                                                                                                                                                                                   |   |                 |                          |    |                 |           |   |                 |           |   |                 |          |   |                 |                |   |                 |                     |   |                 |                                                      |   |                 |                   |
| 1061 | <b>return_redcap_6</b><br><br><b>Show the field ONLY if:</b><br>[return_num] = '6' or [return_num] = '7'     | <b>Does this encounter coincide with an existing visit in REDCap?</b>                                                                         | <b>yesno</b><br><table border="1" data-bbox="1047 800 1138 890"> <tr> <td>1</td> <td>Yes</td> </tr> <tr> <td>0</td> <td>No</td> </tr> </table>                                                                                                                                                                                                                                                                                                                                                                                                                                                                                                                                                               | 1 | Yes             | 0                        | No |                 |           |   |                 |           |   |                 |          |   |                 |                |   |                 |                     |   |                 |                                                      |   |                 |                   |
| 1    | Yes                                                                                                          |                                                                                                                                               |                                                                                                                                                                                                                                                                                                                                                                                                                                                                                                                                                                                                                                                                                                              |   |                 |                          |    |                 |           |   |                 |           |   |                 |          |   |                 |                |   |                 |                     |   |                 |                                                      |   |                 |                   |
| 0    | No                                                                                                           |                                                                                                                                               |                                                                                                                                                                                                                                                                                                                                                                                                                                                                                                                                                                                                                                                                                                              |   |                 |                          |    |                 |           |   |                 |           |   |                 |          |   |                 |                |   |                 |                     |   |                 |                                                      |   |                 |                   |
| 1062 | <b>return_redcap_spec_6</b><br><br><b>Show the field ONLY if:</b><br>[return_redcap_6] = '1'                 | <b>Please enter the visit number</b>                                                                                                          | <b>text</b>                                                                                                                                                                                                                                                                                                                                                                                                                                                                                                                                                                                                                                                                                                  |   |                 |                          |    |                 |           |   |                 |           |   |                 |          |   |                 |                |   |                 |                     |   |                 |                                                      |   |                 |                   |
| 1063 | <b>return_od_6</b><br><br><b>Show the field ONLY if:</b><br>[return_num] = '6' or [return_num] = '7'         | <b>Did the patient present to the ED for opioid overdose?</b>                                                                                 | <b>yesno</b><br><table border="1" data-bbox="1047 1178 1138 1268"> <tr> <td>1</td> <td>Yes</td> </tr> <tr> <td>0</td> <td>No</td> </tr> </table>                                                                                                                                                                                                                                                                                                                                                                                                                                                                                                                                                             | 1 | Yes             | 0                        | No |                 |           |   |                 |           |   |                 |          |   |                 |                |   |                 |                     |   |                 |                                                      |   |                 |                   |
| 1    | Yes                                                                                                          |                                                                                                                                               |                                                                                                                                                                                                                                                                                                                                                                                                                                                                                                                                                                                                                                                                                                              |   |                 |                          |    |                 |           |   |                 |           |   |                 |          |   |                 |                |   |                 |                     |   |                 |                                                      |   |                 |                   |
| 0    | No                                                                                                           |                                                                                                                                               |                                                                                                                                                                                                                                                                                                                                                                                                                                                                                                                                                                                                                                                                                                              |   |                 |                          |    |                 |           |   |                 |           |   |                 |          |   |                 |                |   |                 |                     |   |                 |                                                      |   |                 |                   |
| 1064 | <b>return_illicit_yn_6</b><br><br><b>Show the field ONLY if:</b><br>[return_num] = '6' or [return_num] = '7' | <b>Did the patient or provider report any substance use between the index ED visit and this return visit?</b>                                 | <b>yesno</b><br><table border="1" data-bbox="1047 1339 1138 1430"> <tr> <td>1</td> <td>Yes</td> </tr> <tr> <td>0</td> <td>No</td> </tr> </table>                                                                                                                                                                                                                                                                                                                                                                                                                                                                                                                                                             | 1 | Yes             | 0                        | No |                 |           |   |                 |           |   |                 |          |   |                 |                |   |                 |                     |   |                 |                                                      |   |                 |                   |
| 1    | Yes                                                                                                          |                                                                                                                                               |                                                                                                                                                                                                                                                                                                                                                                                                                                                                                                                                                                                                                                                                                                              |   |                 |                          |    |                 |           |   |                 |           |   |                 |          |   |                 |                |   |                 |                     |   |                 |                                                      |   |                 |                   |
| 0    | No                                                                                                           |                                                                                                                                               |                                                                                                                                                                                                                                                                                                                                                                                                                                                                                                                                                                                                                                                                                                              |   |                 |                          |    |                 |           |   |                 |           |   |                 |          |   |                 |                |   |                 |                     |   |                 |                                                      |   |                 |                   |

|                                                                                                              |                        |                                                                |                                                                                                                                                                                                                                                                                                                                                                                                                                                                                                                                                                                                                                                                                                                                                                                                                                                                                                                                                                                                 |   |                      |                                   |    |                      |                                       |   |                      |                                    |   |                      |                              |   |                      |                                   |   |                      |          |   |                      |            |   |                      |         |   |                      |         |    |                       |                |    |                       |                         |     |                        |             |
|--------------------------------------------------------------------------------------------------------------|------------------------|----------------------------------------------------------------|-------------------------------------------------------------------------------------------------------------------------------------------------------------------------------------------------------------------------------------------------------------------------------------------------------------------------------------------------------------------------------------------------------------------------------------------------------------------------------------------------------------------------------------------------------------------------------------------------------------------------------------------------------------------------------------------------------------------------------------------------------------------------------------------------------------------------------------------------------------------------------------------------------------------------------------------------------------------------------------------------|---|----------------------|-----------------------------------|----|----------------------|---------------------------------------|---|----------------------|------------------------------------|---|----------------------|------------------------------|---|----------------------|-----------------------------------|---|----------------------|----------|---|----------------------|------------|---|----------------------|---------|---|----------------------|---------|----|-----------------------|----------------|----|-----------------------|-------------------------|-----|------------------------|-------------|
| <p><b>1065</b> return_substance_6</p> <p>Show the field ONLY if:<br/>[return_illicit_yn_6] = '1'</p>         |                        | <p>Which substance(s) did the patient use?</p>                 | <p>checkbox</p> <table border="1"> <tr> <td>1</td> <td>return_substance_6_1</td> <td>Opioids (not including buprenorph</td> </tr> <tr> <td>2</td> <td>return_substance_6_2</td> <td>Methampe</td> </tr> <tr> <td>3</td> <td>return_substance_6_3</td> <td>Cocaine</td> </tr> <tr> <td>4</td> <td>return_substance_6_4</td> <td>Cannabis</td> </tr> <tr> <td>5</td> <td>return_substance_6_5</td> <td>Hallucinoge (including Ecstasy/MD</td> </tr> <tr> <td>6</td> <td>return_substance_6_6</td> <td>LSD</td> </tr> <tr> <td>7</td> <td>return_substance_6_7</td> <td>Benzodiaze</td> </tr> <tr> <td>8</td> <td>return_substance_6_8</td> <td>Alcohol</td> </tr> <tr> <td>9</td> <td>return_substance_6_9</td> <td>Tobacco</td> </tr> <tr> <td>10</td> <td>return_substance_6_10</td> <td>Otherstimu NOS</td> </tr> <tr> <td>11</td> <td>return_substance_6_11</td> <td>Other (note heavy usage</td> </tr> <tr> <td>999</td> <td>return_substance_6_999</td> <td>None of the</td> </tr> </table> | 1 | return_substance_6_1 | Opioids (not including buprenorph | 2  | return_substance_6_2 | Methampe                              | 3 | return_substance_6_3 | Cocaine                            | 4 | return_substance_6_4 | Cannabis                     | 5 | return_substance_6_5 | Hallucinoge (including Ecstasy/MD | 6 | return_substance_6_6 | LSD      | 7 | return_substance_6_7 | Benzodiaze | 8 | return_substance_6_8 | Alcohol | 9 | return_substance_6_9 | Tobacco | 10 | return_substance_6_10 | Otherstimu NOS | 11 | return_substance_6_11 | Other (note heavy usage | 999 | return_substance_6_999 | None of the |
| 1                                                                                                            | return_substance_6_1   | Opioids (not including buprenorph                              |                                                                                                                                                                                                                                                                                                                                                                                                                                                                                                                                                                                                                                                                                                                                                                                                                                                                                                                                                                                                 |   |                      |                                   |    |                      |                                       |   |                      |                                    |   |                      |                              |   |                      |                                   |   |                      |          |   |                      |            |   |                      |         |   |                      |         |    |                       |                |    |                       |                         |     |                        |             |
| 2                                                                                                            | return_substance_6_2   | Methampe                                                       |                                                                                                                                                                                                                                                                                                                                                                                                                                                                                                                                                                                                                                                                                                                                                                                                                                                                                                                                                                                                 |   |                      |                                   |    |                      |                                       |   |                      |                                    |   |                      |                              |   |                      |                                   |   |                      |          |   |                      |            |   |                      |         |   |                      |         |    |                       |                |    |                       |                         |     |                        |             |
| 3                                                                                                            | return_substance_6_3   | Cocaine                                                        |                                                                                                                                                                                                                                                                                                                                                                                                                                                                                                                                                                                                                                                                                                                                                                                                                                                                                                                                                                                                 |   |                      |                                   |    |                      |                                       |   |                      |                                    |   |                      |                              |   |                      |                                   |   |                      |          |   |                      |            |   |                      |         |   |                      |         |    |                       |                |    |                       |                         |     |                        |             |
| 4                                                                                                            | return_substance_6_4   | Cannabis                                                       |                                                                                                                                                                                                                                                                                                                                                                                                                                                                                                                                                                                                                                                                                                                                                                                                                                                                                                                                                                                                 |   |                      |                                   |    |                      |                                       |   |                      |                                    |   |                      |                              |   |                      |                                   |   |                      |          |   |                      |            |   |                      |         |   |                      |         |    |                       |                |    |                       |                         |     |                        |             |
| 5                                                                                                            | return_substance_6_5   | Hallucinoge (including Ecstasy/MD                              |                                                                                                                                                                                                                                                                                                                                                                                                                                                                                                                                                                                                                                                                                                                                                                                                                                                                                                                                                                                                 |   |                      |                                   |    |                      |                                       |   |                      |                                    |   |                      |                              |   |                      |                                   |   |                      |          |   |                      |            |   |                      |         |   |                      |         |    |                       |                |    |                       |                         |     |                        |             |
| 6                                                                                                            | return_substance_6_6   | LSD                                                            |                                                                                                                                                                                                                                                                                                                                                                                                                                                                                                                                                                                                                                                                                                                                                                                                                                                                                                                                                                                                 |   |                      |                                   |    |                      |                                       |   |                      |                                    |   |                      |                              |   |                      |                                   |   |                      |          |   |                      |            |   |                      |         |   |                      |         |    |                       |                |    |                       |                         |     |                        |             |
| 7                                                                                                            | return_substance_6_7   | Benzodiaze                                                     |                                                                                                                                                                                                                                                                                                                                                                                                                                                                                                                                                                                                                                                                                                                                                                                                                                                                                                                                                                                                 |   |                      |                                   |    |                      |                                       |   |                      |                                    |   |                      |                              |   |                      |                                   |   |                      |          |   |                      |            |   |                      |         |   |                      |         |    |                       |                |    |                       |                         |     |                        |             |
| 8                                                                                                            | return_substance_6_8   | Alcohol                                                        |                                                                                                                                                                                                                                                                                                                                                                                                                                                                                                                                                                                                                                                                                                                                                                                                                                                                                                                                                                                                 |   |                      |                                   |    |                      |                                       |   |                      |                                    |   |                      |                              |   |                      |                                   |   |                      |          |   |                      |            |   |                      |         |   |                      |         |    |                       |                |    |                       |                         |     |                        |             |
| 9                                                                                                            | return_substance_6_9   | Tobacco                                                        |                                                                                                                                                                                                                                                                                                                                                                                                                                                                                                                                                                                                                                                                                                                                                                                                                                                                                                                                                                                                 |   |                      |                                   |    |                      |                                       |   |                      |                                    |   |                      |                              |   |                      |                                   |   |                      |          |   |                      |            |   |                      |         |   |                      |         |    |                       |                |    |                       |                         |     |                        |             |
| 10                                                                                                           | return_substance_6_10  | Otherstimu NOS                                                 |                                                                                                                                                                                                                                                                                                                                                                                                                                                                                                                                                                                                                                                                                                                                                                                                                                                                                                                                                                                                 |   |                      |                                   |    |                      |                                       |   |                      |                                    |   |                      |                              |   |                      |                                   |   |                      |          |   |                      |            |   |                      |         |   |                      |         |    |                       |                |    |                       |                         |     |                        |             |
| 11                                                                                                           | return_substance_6_11  | Other (note heavy usage                                        |                                                                                                                                                                                                                                                                                                                                                                                                                                                                                                                                                                                                                                                                                                                                                                                                                                                                                                                                                                                                 |   |                      |                                   |    |                      |                                       |   |                      |                                    |   |                      |                              |   |                      |                                   |   |                      |          |   |                      |            |   |                      |         |   |                      |         |    |                       |                |    |                       |                         |     |                        |             |
| 999                                                                                                          | return_substance_6_999 | None of the                                                    |                                                                                                                                                                                                                                                                                                                                                                                                                                                                                                                                                                                                                                                                                                                                                                                                                                                                                                                                                                                                 |   |                      |                                   |    |                      |                                       |   |                      |                                    |   |                      |                              |   |                      |                                   |   |                      |          |   |                      |            |   |                      |         |   |                      |         |    |                       |                |    |                       |                         |     |                        |             |
| <p><b>1066</b> return_substance_oth_6</p> <p>Show the field ONLY if:<br/>[return_substance_6(1)] = '1'</p>   |                        | <p>If "Other," please specify.</p>                             | <p>text</p>                                                                                                                                                                                                                                                                                                                                                                                                                                                                                                                                                                                                                                                                                                                                                                                                                                                                                                                                                                                     |   |                      |                                   |    |                      |                                       |   |                      |                                    |   |                      |                              |   |                      |                                   |   |                      |          |   |                      |            |   |                      |         |   |                      |         |    |                       |                |    |                       |                         |     |                        |             |
| <p><b>1067</b> return_opioid_6</p> <p>Show the field ONLY if:<br/>[return_substance_6(1)] = '1'</p>          |                        | <p>Which opioid(s) did the patient use?</p>                    | <p>checkbox</p> <table border="1"> <tr> <td>1</td> <td>return_opioid_6_1</td> <td>Heroin</td> </tr> <tr> <td>2</td> <td>return_opioid_6_2</td> <td>Oxycodone (OxyContin, Percocet, etc.)</td> </tr> <tr> <td>3</td> <td>return_opioid_6_3</td> <td>Hydrocodone (Norco, Vicodin, etc.)</td> </tr> <tr> <td>4</td> <td>return_opioid_6_4</td> <td>Fentanyl (Duragesic, Ionsys)</td> </tr> <tr> <td>5</td> <td>return_opioid_6_5</td> <td>Hydromorphone (Dilaudid)</td> </tr> <tr> <td>6</td> <td>return_opioid_6_6</td> <td>Morphine</td> </tr> <tr> <td>7</td> <td>return_opioid_6_7</td> <td>Other</td> </tr> </table>                                                                                                                                                                                                                                                                                                                                                                          | 1 | return_opioid_6_1    | Heroin                            | 2  | return_opioid_6_2    | Oxycodone (OxyContin, Percocet, etc.) | 3 | return_opioid_6_3    | Hydrocodone (Norco, Vicodin, etc.) | 4 | return_opioid_6_4    | Fentanyl (Duragesic, Ionsys) | 5 | return_opioid_6_5    | Hydromorphone (Dilaudid)          | 6 | return_opioid_6_6    | Morphine | 7 | return_opioid_6_7    | Other      |   |                      |         |   |                      |         |    |                       |                |    |                       |                         |     |                        |             |
| 1                                                                                                            | return_opioid_6_1      | Heroin                                                         |                                                                                                                                                                                                                                                                                                                                                                                                                                                                                                                                                                                                                                                                                                                                                                                                                                                                                                                                                                                                 |   |                      |                                   |    |                      |                                       |   |                      |                                    |   |                      |                              |   |                      |                                   |   |                      |          |   |                      |            |   |                      |         |   |                      |         |    |                       |                |    |                       |                         |     |                        |             |
| 2                                                                                                            | return_opioid_6_2      | Oxycodone (OxyContin, Percocet, etc.)                          |                                                                                                                                                                                                                                                                                                                                                                                                                                                                                                                                                                                                                                                                                                                                                                                                                                                                                                                                                                                                 |   |                      |                                   |    |                      |                                       |   |                      |                                    |   |                      |                              |   |                      |                                   |   |                      |          |   |                      |            |   |                      |         |   |                      |         |    |                       |                |    |                       |                         |     |                        |             |
| 3                                                                                                            | return_opioid_6_3      | Hydrocodone (Norco, Vicodin, etc.)                             |                                                                                                                                                                                                                                                                                                                                                                                                                                                                                                                                                                                                                                                                                                                                                                                                                                                                                                                                                                                                 |   |                      |                                   |    |                      |                                       |   |                      |                                    |   |                      |                              |   |                      |                                   |   |                      |          |   |                      |            |   |                      |         |   |                      |         |    |                       |                |    |                       |                         |     |                        |             |
| 4                                                                                                            | return_opioid_6_4      | Fentanyl (Duragesic, Ionsys)                                   |                                                                                                                                                                                                                                                                                                                                                                                                                                                                                                                                                                                                                                                                                                                                                                                                                                                                                                                                                                                                 |   |                      |                                   |    |                      |                                       |   |                      |                                    |   |                      |                              |   |                      |                                   |   |                      |          |   |                      |            |   |                      |         |   |                      |         |    |                       |                |    |                       |                         |     |                        |             |
| 5                                                                                                            | return_opioid_6_5      | Hydromorphone (Dilaudid)                                       |                                                                                                                                                                                                                                                                                                                                                                                                                                                                                                                                                                                                                                                                                                                                                                                                                                                                                                                                                                                                 |   |                      |                                   |    |                      |                                       |   |                      |                                    |   |                      |                              |   |                      |                                   |   |                      |          |   |                      |            |   |                      |         |   |                      |         |    |                       |                |    |                       |                         |     |                        |             |
| 6                                                                                                            | return_opioid_6_6      | Morphine                                                       |                                                                                                                                                                                                                                                                                                                                                                                                                                                                                                                                                                                                                                                                                                                                                                                                                                                                                                                                                                                                 |   |                      |                                   |    |                      |                                       |   |                      |                                    |   |                      |                              |   |                      |                                   |   |                      |          |   |                      |            |   |                      |         |   |                      |         |    |                       |                |    |                       |                         |     |                        |             |
| 7                                                                                                            | return_opioid_6_7      | Other                                                          |                                                                                                                                                                                                                                                                                                                                                                                                                                                                                                                                                                                                                                                                                                                                                                                                                                                                                                                                                                                                 |   |                      |                                   |    |                      |                                       |   |                      |                                    |   |                      |                              |   |                      |                                   |   |                      |          |   |                      |            |   |                      |         |   |                      |         |    |                       |                |    |                       |                         |     |                        |             |
| <p><b>1068</b> return_opioid_oth_6</p> <p>Show the field ONLY if:<br/>[return_opioid_6(7)] = '1'</p>         |                        | <p>If "Other," please specify.</p>                             | <p>text</p>                                                                                                                                                                                                                                                                                                                                                                                                                                                                                                                                                                                                                                                                                                                                                                                                                                                                                                                                                                                     |   |                      |                                   |    |                      |                                       |   |                      |                                    |   |                      |                              |   |                      |                                   |   |                      |          |   |                      |            |   |                      |         |   |                      |         |    |                       |                |    |                       |                         |     |                        |             |
| <p><b>1069</b> return_utox_6</p> <p>Show the field ONLY if:<br/>[return_num] = '6' or [return_num] = '7'</p> |                        | <p>Was a urine toxicology screen performed for this visit?</p> | <p>yesno</p> <table border="1"> <tr> <td>1</td> <td>Yes</td> </tr> <tr> <td>0</td> <td>No</td> </tr> </table>                                                                                                                                                                                                                                                                                                                                                                                                                                                                                                                                                                                                                                                                                                                                                                                                                                                                                   | 1 | Yes                  | 0                                 | No |                      |                                       |   |                      |                                    |   |                      |                              |   |                      |                                   |   |                      |          |   |                      |            |   |                      |         |   |                      |         |    |                       |                |    |                       |                         |     |                        |             |
| 1                                                                                                            | Yes                    |                                                                |                                                                                                                                                                                                                                                                                                                                                                                                                                                                                                                                                                                                                                                                                                                                                                                                                                                                                                                                                                                                 |   |                      |                                   |    |                      |                                       |   |                      |                                    |   |                      |                              |   |                      |                                   |   |                      |          |   |                      |            |   |                      |         |   |                      |         |    |                       |                |    |                       |                         |     |                        |             |
| 0                                                                                                            | No                     |                                                                |                                                                                                                                                                                                                                                                                                                                                                                                                                                                                                                                                                                                                                                                                                                                                                                                                                                                                                                                                                                                 |   |                      |                                   |    |                      |                                       |   |                      |                                    |   |                      |                              |   |                      |                                   |   |                      |          |   |                      |            |   |                      |         |   |                      |         |    |                       |                |    |                       |                         |     |                        |             |

| 1070     | <b>return_utox_spec_6</b><br>Show the field ONLY if:<br>[return_utox_6] = '1'                  | <b>Please select all drugs shown to be positive in the urine toxicology analysis:</b>                                                                                                                                                                  | <table border="1"> <tr> <th colspan="3">checkbox</th> </tr> <tr> <td>1</td> <td>return_utox_spec_6_1</td> <td>Amphetami</td> </tr> <tr> <td>2</td> <td>return_utox_spec_6_2</td> <td>Barbiturates</td> </tr> <tr> <td>3</td> <td>return_utox_spec_6_3</td> <td>Cocaine</td> </tr> <tr> <td>4</td> <td>return_utox_spec_6_4</td> <td>Methaqualo</td> </tr> <tr> <td>5</td> <td>return_utox_spec_6_5</td> <td>Methadone</td> </tr> <tr> <td>6</td> <td>return_utox_spec_6_6</td> <td>Methamphe</td> </tr> <tr> <td>7</td> <td>return_utox_spec_6_7</td> <td>Opiates</td> </tr> <tr> <td>8</td> <td>return_utox_spec_6_8</td> <td>Phencyclidin</td> </tr> <tr> <td>9</td> <td>return_utox_spec_6_9</td> <td>Marijuana</td> </tr> <tr> <td>10</td> <td>return_utox_spec_6_10</td> <td>Benzodiazep</td> </tr> <tr> <td>11</td> <td>return_utox_spec_6_11</td> <td>Propoxyph</td> </tr> <tr> <td>12</td> <td>return_utox_spec_6_12</td> <td>Amphetami</td> </tr> <tr> <td>13</td> <td>return_utox_spec_6_13</td> <td>Other</td> </tr> <tr> <td>999</td> <td>return_utox_spec_6_999</td> <td>None of the</td> </tr> </table> | checkbox |     |   | 1  | return_utox_spec_6_1 | Amphetami | 2 | return_utox_spec_6_2 | Barbiturates                             | 3 | return_utox_spec_6_3 | Cocaine                                 | 4 | return_utox_spec_6_4 | Methaqualo        | 5 | return_utox_spec_6_5 | Methadone | 6 | return_utox_spec_6_6 | Methamphe | 7 | return_utox_spec_6_7 | Opiates | 8 | return_utox_spec_6_8 | Phencyclidin | 9 | return_utox_spec_6_9 | Marijuana | 10 | return_utox_spec_6_10 | Benzodiazep | 11 | return_utox_spec_6_11 | Propoxyph | 12 | return_utox_spec_6_12 | Amphetami | 13 | return_utox_spec_6_13 | Other | 999 | return_utox_spec_6_999 | None of the |
|----------|------------------------------------------------------------------------------------------------|--------------------------------------------------------------------------------------------------------------------------------------------------------------------------------------------------------------------------------------------------------|-----------------------------------------------------------------------------------------------------------------------------------------------------------------------------------------------------------------------------------------------------------------------------------------------------------------------------------------------------------------------------------------------------------------------------------------------------------------------------------------------------------------------------------------------------------------------------------------------------------------------------------------------------------------------------------------------------------------------------------------------------------------------------------------------------------------------------------------------------------------------------------------------------------------------------------------------------------------------------------------------------------------------------------------------------------------------------------------------------------------------|----------|-----|---|----|----------------------|-----------|---|----------------------|------------------------------------------|---|----------------------|-----------------------------------------|---|----------------------|-------------------|---|----------------------|-----------|---|----------------------|-----------|---|----------------------|---------|---|----------------------|--------------|---|----------------------|-----------|----|-----------------------|-------------|----|-----------------------|-----------|----|-----------------------|-----------|----|-----------------------|-------|-----|------------------------|-------------|
| checkbox |                                                                                                |                                                                                                                                                                                                                                                        |                                                                                                                                                                                                                                                                                                                                                                                                                                                                                                                                                                                                                                                                                                                                                                                                                                                                                                                                                                                                                                                                                                                       |          |     |   |    |                      |           |   |                      |                                          |   |                      |                                         |   |                      |                   |   |                      |           |   |                      |           |   |                      |         |   |                      |              |   |                      |           |    |                       |             |    |                       |           |    |                       |           |    |                       |       |     |                        |             |
| 1        | return_utox_spec_6_1                                                                           | Amphetami                                                                                                                                                                                                                                              |                                                                                                                                                                                                                                                                                                                                                                                                                                                                                                                                                                                                                                                                                                                                                                                                                                                                                                                                                                                                                                                                                                                       |          |     |   |    |                      |           |   |                      |                                          |   |                      |                                         |   |                      |                   |   |                      |           |   |                      |           |   |                      |         |   |                      |              |   |                      |           |    |                       |             |    |                       |           |    |                       |           |    |                       |       |     |                        |             |
| 2        | return_utox_spec_6_2                                                                           | Barbiturates                                                                                                                                                                                                                                           |                                                                                                                                                                                                                                                                                                                                                                                                                                                                                                                                                                                                                                                                                                                                                                                                                                                                                                                                                                                                                                                                                                                       |          |     |   |    |                      |           |   |                      |                                          |   |                      |                                         |   |                      |                   |   |                      |           |   |                      |           |   |                      |         |   |                      |              |   |                      |           |    |                       |             |    |                       |           |    |                       |           |    |                       |       |     |                        |             |
| 3        | return_utox_spec_6_3                                                                           | Cocaine                                                                                                                                                                                                                                                |                                                                                                                                                                                                                                                                                                                                                                                                                                                                                                                                                                                                                                                                                                                                                                                                                                                                                                                                                                                                                                                                                                                       |          |     |   |    |                      |           |   |                      |                                          |   |                      |                                         |   |                      |                   |   |                      |           |   |                      |           |   |                      |         |   |                      |              |   |                      |           |    |                       |             |    |                       |           |    |                       |           |    |                       |       |     |                        |             |
| 4        | return_utox_spec_6_4                                                                           | Methaqualo                                                                                                                                                                                                                                             |                                                                                                                                                                                                                                                                                                                                                                                                                                                                                                                                                                                                                                                                                                                                                                                                                                                                                                                                                                                                                                                                                                                       |          |     |   |    |                      |           |   |                      |                                          |   |                      |                                         |   |                      |                   |   |                      |           |   |                      |           |   |                      |         |   |                      |              |   |                      |           |    |                       |             |    |                       |           |    |                       |           |    |                       |       |     |                        |             |
| 5        | return_utox_spec_6_5                                                                           | Methadone                                                                                                                                                                                                                                              |                                                                                                                                                                                                                                                                                                                                                                                                                                                                                                                                                                                                                                                                                                                                                                                                                                                                                                                                                                                                                                                                                                                       |          |     |   |    |                      |           |   |                      |                                          |   |                      |                                         |   |                      |                   |   |                      |           |   |                      |           |   |                      |         |   |                      |              |   |                      |           |    |                       |             |    |                       |           |    |                       |           |    |                       |       |     |                        |             |
| 6        | return_utox_spec_6_6                                                                           | Methamphe                                                                                                                                                                                                                                              |                                                                                                                                                                                                                                                                                                                                                                                                                                                                                                                                                                                                                                                                                                                                                                                                                                                                                                                                                                                                                                                                                                                       |          |     |   |    |                      |           |   |                      |                                          |   |                      |                                         |   |                      |                   |   |                      |           |   |                      |           |   |                      |         |   |                      |              |   |                      |           |    |                       |             |    |                       |           |    |                       |           |    |                       |       |     |                        |             |
| 7        | return_utox_spec_6_7                                                                           | Opiates                                                                                                                                                                                                                                                |                                                                                                                                                                                                                                                                                                                                                                                                                                                                                                                                                                                                                                                                                                                                                                                                                                                                                                                                                                                                                                                                                                                       |          |     |   |    |                      |           |   |                      |                                          |   |                      |                                         |   |                      |                   |   |                      |           |   |                      |           |   |                      |         |   |                      |              |   |                      |           |    |                       |             |    |                       |           |    |                       |           |    |                       |       |     |                        |             |
| 8        | return_utox_spec_6_8                                                                           | Phencyclidin                                                                                                                                                                                                                                           |                                                                                                                                                                                                                                                                                                                                                                                                                                                                                                                                                                                                                                                                                                                                                                                                                                                                                                                                                                                                                                                                                                                       |          |     |   |    |                      |           |   |                      |                                          |   |                      |                                         |   |                      |                   |   |                      |           |   |                      |           |   |                      |         |   |                      |              |   |                      |           |    |                       |             |    |                       |           |    |                       |           |    |                       |       |     |                        |             |
| 9        | return_utox_spec_6_9                                                                           | Marijuana                                                                                                                                                                                                                                              |                                                                                                                                                                                                                                                                                                                                                                                                                                                                                                                                                                                                                                                                                                                                                                                                                                                                                                                                                                                                                                                                                                                       |          |     |   |    |                      |           |   |                      |                                          |   |                      |                                         |   |                      |                   |   |                      |           |   |                      |           |   |                      |         |   |                      |              |   |                      |           |    |                       |             |    |                       |           |    |                       |           |    |                       |       |     |                        |             |
| 10       | return_utox_spec_6_10                                                                          | Benzodiazep                                                                                                                                                                                                                                            |                                                                                                                                                                                                                                                                                                                                                                                                                                                                                                                                                                                                                                                                                                                                                                                                                                                                                                                                                                                                                                                                                                                       |          |     |   |    |                      |           |   |                      |                                          |   |                      |                                         |   |                      |                   |   |                      |           |   |                      |           |   |                      |         |   |                      |              |   |                      |           |    |                       |             |    |                       |           |    |                       |           |    |                       |       |     |                        |             |
| 11       | return_utox_spec_6_11                                                                          | Propoxyph                                                                                                                                                                                                                                              |                                                                                                                                                                                                                                                                                                                                                                                                                                                                                                                                                                                                                                                                                                                                                                                                                                                                                                                                                                                                                                                                                                                       |          |     |   |    |                      |           |   |                      |                                          |   |                      |                                         |   |                      |                   |   |                      |           |   |                      |           |   |                      |         |   |                      |              |   |                      |           |    |                       |             |    |                       |           |    |                       |           |    |                       |       |     |                        |             |
| 12       | return_utox_spec_6_12                                                                          | Amphetami                                                                                                                                                                                                                                              |                                                                                                                                                                                                                                                                                                                                                                                                                                                                                                                                                                                                                                                                                                                                                                                                                                                                                                                                                                                                                                                                                                                       |          |     |   |    |                      |           |   |                      |                                          |   |                      |                                         |   |                      |                   |   |                      |           |   |                      |           |   |                      |         |   |                      |              |   |                      |           |    |                       |             |    |                       |           |    |                       |           |    |                       |       |     |                        |             |
| 13       | return_utox_spec_6_13                                                                          | Other                                                                                                                                                                                                                                                  |                                                                                                                                                                                                                                                                                                                                                                                                                                                                                                                                                                                                                                                                                                                                                                                                                                                                                                                                                                                                                                                                                                                       |          |     |   |    |                      |           |   |                      |                                          |   |                      |                                         |   |                      |                   |   |                      |           |   |                      |           |   |                      |         |   |                      |              |   |                      |           |    |                       |             |    |                       |           |    |                       |           |    |                       |       |     |                        |             |
| 999      | return_utox_spec_6_999                                                                         | None of the                                                                                                                                                                                                                                            |                                                                                                                                                                                                                                                                                                                                                                                                                                                                                                                                                                                                                                                                                                                                                                                                                                                                                                                                                                                                                                                                                                                       |          |     |   |    |                      |           |   |                      |                                          |   |                      |                                         |   |                      |                   |   |                      |           |   |                      |           |   |                      |         |   |                      |              |   |                      |           |    |                       |             |    |                       |           |    |                       |           |    |                       |       |     |                        |             |
| 1071     | <b>return_utox_oth_6</b><br>Show the field ONLY if:<br>[return_utox_spec_6(13)] = '1'          | <b>If "Other," please specify</b>                                                                                                                                                                                                                      | <b>text</b>                                                                                                                                                                                                                                                                                                                                                                                                                                                                                                                                                                                                                                                                                                                                                                                                                                                                                                                                                                                                                                                                                                           |          |     |   |    |                      |           |   |                      |                                          |   |                      |                                         |   |                      |                   |   |                      |           |   |                      |           |   |                      |         |   |                      |              |   |                      |           |    |                       |             |    |                       |           |    |                       |           |    |                       |       |     |                        |             |
| 1072     | <b>return_craving_6</b><br>Show the field ONLY if:<br>[return_num] = '6' or [return_num] = '7' | <b>Did the patient or provider mention opioid cravings during the visit?</b>                                                                                                                                                                           | <b>yesno</b><br><table border="1"> <tr> <td>1</td> <td>Yes</td> </tr> <tr> <td>0</td> <td>No</td> </tr> </table>                                                                                                                                                                                                                                                                                                                                                                                                                                                                                                                                                                                                                                                                                                                                                                                                                                                                                                                                                                                                      | 1        | Yes | 0 | No |                      |           |   |                      |                                          |   |                      |                                         |   |                      |                   |   |                      |           |   |                      |           |   |                      |         |   |                      |              |   |                      |           |    |                       |             |    |                       |           |    |                       |           |    |                       |       |     |                        |             |
| 1        | Yes                                                                                            |                                                                                                                                                                                                                                                        |                                                                                                                                                                                                                                                                                                                                                                                                                                                                                                                                                                                                                                                                                                                                                                                                                                                                                                                                                                                                                                                                                                                       |          |     |   |    |                      |           |   |                      |                                          |   |                      |                                         |   |                      |                   |   |                      |           |   |                      |           |   |                      |         |   |                      |              |   |                      |           |    |                       |             |    |                       |           |    |                       |           |    |                       |       |     |                        |             |
| 0        | No                                                                                             |                                                                                                                                                                                                                                                        |                                                                                                                                                                                                                                                                                                                                                                                                                                                                                                                                                                                                                                                                                                                                                                                                                                                                                                                                                                                                                                                                                                                       |          |     |   |    |                      |           |   |                      |                                          |   |                      |                                         |   |                      |                   |   |                      |           |   |                      |           |   |                      |         |   |                      |              |   |                      |           |    |                       |             |    |                       |           |    |                       |           |    |                       |       |     |                        |             |
| 1073     | <b>return_wd_6</b><br>Show the field ONLY if:<br>[return_num] = '6' or [return_num] = '7'      | <b>Did the patient complaint about or exhibit any signs or symptoms of withdrawal during this visit?</b><br><i>If the patient received buprenorphine during this visit, only select signs/symptoms documented BEFORE buprenorphine administration.</i> | <b>yesno</b><br><table border="1"> <tr> <td>1</td> <td>Yes</td> </tr> <tr> <td>0</td> <td>No</td> </tr> </table>                                                                                                                                                                                                                                                                                                                                                                                                                                                                                                                                                                                                                                                                                                                                                                                                                                                                                                                                                                                                      | 1        | Yes | 0 | No |                      |           |   |                      |                                          |   |                      |                                         |   |                      |                   |   |                      |           |   |                      |           |   |                      |         |   |                      |              |   |                      |           |    |                       |             |    |                       |           |    |                       |           |    |                       |       |     |                        |             |
| 1        | Yes                                                                                            |                                                                                                                                                                                                                                                        |                                                                                                                                                                                                                                                                                                                                                                                                                                                                                                                                                                                                                                                                                                                                                                                                                                                                                                                                                                                                                                                                                                                       |          |     |   |    |                      |           |   |                      |                                          |   |                      |                                         |   |                      |                   |   |                      |           |   |                      |           |   |                      |         |   |                      |              |   |                      |           |    |                       |             |    |                       |           |    |                       |           |    |                       |       |     |                        |             |
| 0        | No                                                                                             |                                                                                                                                                                                                                                                        |                                                                                                                                                                                                                                                                                                                                                                                                                                                                                                                                                                                                                                                                                                                                                                                                                                                                                                                                                                                                                                                                                                                       |          |     |   |    |                      |           |   |                      |                                          |   |                      |                                         |   |                      |                   |   |                      |           |   |                      |           |   |                      |         |   |                      |              |   |                      |           |    |                       |             |    |                       |           |    |                       |           |    |                       |       |     |                        |             |
| 1074     | <b>return_sedation_6</b><br>Show the field ONLY if:<br>[return_wd_6] = '1'                     | <b>Section Header:</b> <i>Return Sedation6</i><br><b>Which of the following signs or symptoms of sedation were documented?</b>                                                                                                                         | <table border="1"> <tr> <th colspan="3">checkbox</th> </tr> <tr> <td>1</td> <td>return_sedation_6_1</td> <td>Nodding</td> </tr> <tr> <td>2</td> <td>return_sedation_6_2</td> <td>Sleepy, drowsy, difficulty staying awake</td> </tr> <tr> <td>3</td> <td>return_sedation_6_3</td> <td>Feelings of general fatigue or weakness</td> </tr> <tr> <td>0</td> <td>return_sedation_6_0</td> <td>None of the above</td> </tr> </table>                                                                                                                                                                                                                                                                                                                                                                                                                                                                                                                                                                                                                                                                                       | checkbox |     |   | 1  | return_sedation_6_1  | Nodding   | 2 | return_sedation_6_2  | Sleepy, drowsy, difficulty staying awake | 3 | return_sedation_6_3  | Feelings of general fatigue or weakness | 0 | return_sedation_6_0  | None of the above |   |                      |           |   |                      |           |   |                      |         |   |                      |              |   |                      |           |    |                       |             |    |                       |           |    |                       |           |    |                       |       |     |                        |             |
| checkbox |                                                                                                |                                                                                                                                                                                                                                                        |                                                                                                                                                                                                                                                                                                                                                                                                                                                                                                                                                                                                                                                                                                                                                                                                                                                                                                                                                                                                                                                                                                                       |          |     |   |    |                      |           |   |                      |                                          |   |                      |                                         |   |                      |                   |   |                      |           |   |                      |           |   |                      |         |   |                      |              |   |                      |           |    |                       |             |    |                       |           |    |                       |           |    |                       |       |     |                        |             |
| 1        | return_sedation_6_1                                                                            | Nodding                                                                                                                                                                                                                                                |                                                                                                                                                                                                                                                                                                                                                                                                                                                                                                                                                                                                                                                                                                                                                                                                                                                                                                                                                                                                                                                                                                                       |          |     |   |    |                      |           |   |                      |                                          |   |                      |                                         |   |                      |                   |   |                      |           |   |                      |           |   |                      |         |   |                      |              |   |                      |           |    |                       |             |    |                       |           |    |                       |           |    |                       |       |     |                        |             |
| 2        | return_sedation_6_2                                                                            | Sleepy, drowsy, difficulty staying awake                                                                                                                                                                                                               |                                                                                                                                                                                                                                                                                                                                                                                                                                                                                                                                                                                                                                                                                                                                                                                                                                                                                                                                                                                                                                                                                                                       |          |     |   |    |                      |           |   |                      |                                          |   |                      |                                         |   |                      |                   |   |                      |           |   |                      |           |   |                      |         |   |                      |              |   |                      |           |    |                       |             |    |                       |           |    |                       |           |    |                       |       |     |                        |             |
| 3        | return_sedation_6_3                                                                            | Feelings of general fatigue or weakness                                                                                                                                                                                                                |                                                                                                                                                                                                                                                                                                                                                                                                                                                                                                                                                                                                                                                                                                                                                                                                                                                                                                                                                                                                                                                                                                                       |          |     |   |    |                      |           |   |                      |                                          |   |                      |                                         |   |                      |                   |   |                      |           |   |                      |           |   |                      |         |   |                      |              |   |                      |           |    |                       |             |    |                       |           |    |                       |           |    |                       |       |     |                        |             |
| 0        | return_sedation_6_0                                                                            | None of the above                                                                                                                                                                                                                                      |                                                                                                                                                                                                                                                                                                                                                                                                                                                                                                                                                                                                                                                                                                                                                                                                                                                                                                                                                                                                                                                                                                                       |          |     |   |    |                      |           |   |                      |                                          |   |                      |                                         |   |                      |                   |   |                      |           |   |                      |           |   |                      |         |   |                      |              |   |                      |           |    |                       |             |    |                       |           |    |                       |           |    |                       |       |     |                        |             |

|                                                                                            |                    |                                                                                                                                                    |                                                                                                                                                                                                                                                                                                                                                                                                                                                                                                                                                                                                                                                                                                                                                                                                                                                                                                                                                                                                                                               |   |                    |                                     |   |                    |                                       |   |                    |               |   |                    |                |   |                    |                   |   |                  |                   |   |                  |                     |   |                  |      |   |                  |          |    |                   |         |    |                   |                          |    |                   |                              |    |                   |                  |   |                  |                   |
|--------------------------------------------------------------------------------------------|--------------------|----------------------------------------------------------------------------------------------------------------------------------------------------|-----------------------------------------------------------------------------------------------------------------------------------------------------------------------------------------------------------------------------------------------------------------------------------------------------------------------------------------------------------------------------------------------------------------------------------------------------------------------------------------------------------------------------------------------------------------------------------------------------------------------------------------------------------------------------------------------------------------------------------------------------------------------------------------------------------------------------------------------------------------------------------------------------------------------------------------------------------------------------------------------------------------------------------------------|---|--------------------|-------------------------------------|---|--------------------|---------------------------------------|---|--------------------|---------------|---|--------------------|----------------|---|--------------------|-------------------|---|------------------|-------------------|---|------------------|---------------------|---|------------------|------|---|------------------|----------|----|-------------------|---------|----|-------------------|--------------------------|----|-------------------|------------------------------|----|-------------------|------------------|---|------------------|-------------------|
| <p><b>1075 return_intox_6</b></p> <p>Show the field ONLY if:<br/>[return_wd_6] = '1'</p>   |                    | <p><b>Section Header:</b> <i>Return Intoxication 6</i></p> <p><b>Which of the following signs or symptoms of intoxication were documented?</b></p> | <p><b>checkbox</b></p> <table border="1"> <tr><td>1</td><td>return_intox_6_1</td><td>Good mood</td></tr> <tr><td>2</td><td>return_intox_6_2</td><td>Coasting (Spaced out)</td></tr> <tr><td>3</td><td>return_intox_6_3</td><td>Pleasant Sick</td></tr> <tr><td>4</td><td>return_intox_6_4</td><td>Drive (energy)</td></tr> <tr><td>5</td><td>return_intox_6_5</td><td>High</td></tr> <tr><td>6</td><td>return_intox_6_6</td><td>Drunken</td></tr> <tr><td>7</td><td>return_intox_6_7</td><td>Soapbox (talkative)</td></tr> <tr><td>8</td><td>return_intox_6_8</td><td>Rush</td></tr> <tr><td>9</td><td>return_intox_6_9</td><td>Friendly</td></tr> <tr><td>10</td><td>return_intox_6_10</td><td>Relaxed</td></tr> <tr><td>11</td><td>return_intox_6_11</td><td>Difficulty concentrating</td></tr> <tr><td>12</td><td>return_intox_6_12</td><td>Feeling lightheaded or dizzy</td></tr> <tr><td>13</td><td>return_intox_6_13</td><td>Feeling confused</td></tr> <tr><td>0</td><td>return_intox_6_0</td><td>None of the above</td></tr> </table> | 1 | return_intox_6_1   | Good mood                           | 2 | return_intox_6_2   | Coasting (Spaced out)                 | 3 | return_intox_6_3   | Pleasant Sick | 4 | return_intox_6_4   | Drive (energy) | 5 | return_intox_6_5   | High              | 6 | return_intox_6_6 | Drunken           | 7 | return_intox_6_7 | Soapbox (talkative) | 8 | return_intox_6_8 | Rush | 9 | return_intox_6_9 | Friendly | 10 | return_intox_6_10 | Relaxed | 11 | return_intox_6_11 | Difficulty concentrating | 12 | return_intox_6_12 | Feeling lightheaded or dizzy | 13 | return_intox_6_13 | Feeling confused | 0 | return_intox_6_0 | None of the above |
| 1                                                                                          | return_intox_6_1   | Good mood                                                                                                                                          |                                                                                                                                                                                                                                                                                                                                                                                                                                                                                                                                                                                                                                                                                                                                                                                                                                                                                                                                                                                                                                               |   |                    |                                     |   |                    |                                       |   |                    |               |   |                    |                |   |                    |                   |   |                  |                   |   |                  |                     |   |                  |      |   |                  |          |    |                   |         |    |                   |                          |    |                   |                              |    |                   |                  |   |                  |                   |
| 2                                                                                          | return_intox_6_2   | Coasting (Spaced out)                                                                                                                              |                                                                                                                                                                                                                                                                                                                                                                                                                                                                                                                                                                                                                                                                                                                                                                                                                                                                                                                                                                                                                                               |   |                    |                                     |   |                    |                                       |   |                    |               |   |                    |                |   |                    |                   |   |                  |                   |   |                  |                     |   |                  |      |   |                  |          |    |                   |         |    |                   |                          |    |                   |                              |    |                   |                  |   |                  |                   |
| 3                                                                                          | return_intox_6_3   | Pleasant Sick                                                                                                                                      |                                                                                                                                                                                                                                                                                                                                                                                                                                                                                                                                                                                                                                                                                                                                                                                                                                                                                                                                                                                                                                               |   |                    |                                     |   |                    |                                       |   |                    |               |   |                    |                |   |                    |                   |   |                  |                   |   |                  |                     |   |                  |      |   |                  |          |    |                   |         |    |                   |                          |    |                   |                              |    |                   |                  |   |                  |                   |
| 4                                                                                          | return_intox_6_4   | Drive (energy)                                                                                                                                     |                                                                                                                                                                                                                                                                                                                                                                                                                                                                                                                                                                                                                                                                                                                                                                                                                                                                                                                                                                                                                                               |   |                    |                                     |   |                    |                                       |   |                    |               |   |                    |                |   |                    |                   |   |                  |                   |   |                  |                     |   |                  |      |   |                  |          |    |                   |         |    |                   |                          |    |                   |                              |    |                   |                  |   |                  |                   |
| 5                                                                                          | return_intox_6_5   | High                                                                                                                                               |                                                                                                                                                                                                                                                                                                                                                                                                                                                                                                                                                                                                                                                                                                                                                                                                                                                                                                                                                                                                                                               |   |                    |                                     |   |                    |                                       |   |                    |               |   |                    |                |   |                    |                   |   |                  |                   |   |                  |                     |   |                  |      |   |                  |          |    |                   |         |    |                   |                          |    |                   |                              |    |                   |                  |   |                  |                   |
| 6                                                                                          | return_intox_6_6   | Drunken                                                                                                                                            |                                                                                                                                                                                                                                                                                                                                                                                                                                                                                                                                                                                                                                                                                                                                                                                                                                                                                                                                                                                                                                               |   |                    |                                     |   |                    |                                       |   |                    |               |   |                    |                |   |                    |                   |   |                  |                   |   |                  |                     |   |                  |      |   |                  |          |    |                   |         |    |                   |                          |    |                   |                              |    |                   |                  |   |                  |                   |
| 7                                                                                          | return_intox_6_7   | Soapbox (talkative)                                                                                                                                |                                                                                                                                                                                                                                                                                                                                                                                                                                                                                                                                                                                                                                                                                                                                                                                                                                                                                                                                                                                                                                               |   |                    |                                     |   |                    |                                       |   |                    |               |   |                    |                |   |                    |                   |   |                  |                   |   |                  |                     |   |                  |      |   |                  |          |    |                   |         |    |                   |                          |    |                   |                              |    |                   |                  |   |                  |                   |
| 8                                                                                          | return_intox_6_8   | Rush                                                                                                                                               |                                                                                                                                                                                                                                                                                                                                                                                                                                                                                                                                                                                                                                                                                                                                                                                                                                                                                                                                                                                                                                               |   |                    |                                     |   |                    |                                       |   |                    |               |   |                    |                |   |                    |                   |   |                  |                   |   |                  |                     |   |                  |      |   |                  |          |    |                   |         |    |                   |                          |    |                   |                              |    |                   |                  |   |                  |                   |
| 9                                                                                          | return_intox_6_9   | Friendly                                                                                                                                           |                                                                                                                                                                                                                                                                                                                                                                                                                                                                                                                                                                                                                                                                                                                                                                                                                                                                                                                                                                                                                                               |   |                    |                                     |   |                    |                                       |   |                    |               |   |                    |                |   |                    |                   |   |                  |                   |   |                  |                     |   |                  |      |   |                  |          |    |                   |         |    |                   |                          |    |                   |                              |    |                   |                  |   |                  |                   |
| 10                                                                                         | return_intox_6_10  | Relaxed                                                                                                                                            |                                                                                                                                                                                                                                                                                                                                                                                                                                                                                                                                                                                                                                                                                                                                                                                                                                                                                                                                                                                                                                               |   |                    |                                     |   |                    |                                       |   |                    |               |   |                    |                |   |                    |                   |   |                  |                   |   |                  |                     |   |                  |      |   |                  |          |    |                   |         |    |                   |                          |    |                   |                              |    |                   |                  |   |                  |                   |
| 11                                                                                         | return_intox_6_11  | Difficulty concentrating                                                                                                                           |                                                                                                                                                                                                                                                                                                                                                                                                                                                                                                                                                                                                                                                                                                                                                                                                                                                                                                                                                                                                                                               |   |                    |                                     |   |                    |                                       |   |                    |               |   |                    |                |   |                    |                   |   |                  |                   |   |                  |                     |   |                  |      |   |                  |          |    |                   |         |    |                   |                          |    |                   |                              |    |                   |                  |   |                  |                   |
| 12                                                                                         | return_intox_6_12  | Feeling lightheaded or dizzy                                                                                                                       |                                                                                                                                                                                                                                                                                                                                                                                                                                                                                                                                                                                                                                                                                                                                                                                                                                                                                                                                                                                                                                               |   |                    |                                     |   |                    |                                       |   |                    |               |   |                    |                |   |                    |                   |   |                  |                   |   |                  |                     |   |                  |      |   |                  |          |    |                   |         |    |                   |                          |    |                   |                              |    |                   |                  |   |                  |                   |
| 13                                                                                         | return_intox_6_13  | Feeling confused                                                                                                                                   |                                                                                                                                                                                                                                                                                                                                                                                                                                                                                                                                                                                                                                                                                                                                                                                                                                                                                                                                                                                                                                               |   |                    |                                     |   |                    |                                       |   |                    |               |   |                    |                |   |                    |                   |   |                  |                   |   |                  |                     |   |                  |      |   |                  |          |    |                   |         |    |                   |                          |    |                   |                              |    |                   |                  |   |                  |                   |
| 0                                                                                          | return_intox_6_0   | None of the above                                                                                                                                  |                                                                                                                                                                                                                                                                                                                                                                                                                                                                                                                                                                                                                                                                                                                                                                                                                                                                                                                                                                                                                                               |   |                    |                                     |   |                    |                                       |   |                    |               |   |                    |                |   |                    |                   |   |                  |                   |   |                  |                     |   |                  |      |   |                  |          |    |                   |         |    |                   |                          |    |                   |                              |    |                   |                  |   |                  |                   |
| <p><b>1076 return_gi_6</b></p> <p>Show the field ONLY if:<br/>[return_wd_6] = '1'</p>      |                    | <p><b>Section Header:</b> <i>Return GI 6</i></p> <p><b>Which of the following gastrointestinal signs or symptoms were documented?</b></p>          | <p><b>checkbox</b></p> <table border="1"> <tr><td>1</td><td>return_gi_6_1</td><td>Constipation</td></tr> <tr><td>2</td><td>return_gi_6_2</td><td>Turning of stomach/cramping/abdo pain</td></tr> <tr><td>3</td><td>return_gi_6_3</td><td>Nausea</td></tr> <tr><td>4</td><td>return_gi_6_4</td><td>Vomiting</td></tr> <tr><td>5</td><td>return_gi_6_5</td><td>Diarrhea</td></tr> <tr><td>0</td><td>return_gi_6_0</td><td>None of the above</td></tr> </table>                                                                                                                                                                                                                                                                                                                                                                                                                                                                                                                                                                                  | 1 | return_gi_6_1      | Constipation                        | 2 | return_gi_6_2      | Turning of stomach/cramping/abdo pain | 3 | return_gi_6_3      | Nausea        | 4 | return_gi_6_4      | Vomiting       | 5 | return_gi_6_5      | Diarrhea          | 0 | return_gi_6_0    | None of the above |   |                  |                     |   |                  |      |   |                  |          |    |                   |         |    |                   |                          |    |                   |                              |    |                   |                  |   |                  |                   |
| 1                                                                                          | return_gi_6_1      | Constipation                                                                                                                                       |                                                                                                                                                                                                                                                                                                                                                                                                                                                                                                                                                                                                                                                                                                                                                                                                                                                                                                                                                                                                                                               |   |                    |                                     |   |                    |                                       |   |                    |               |   |                    |                |   |                    |                   |   |                  |                   |   |                  |                     |   |                  |      |   |                  |          |    |                   |         |    |                   |                          |    |                   |                              |    |                   |                  |   |                  |                   |
| 2                                                                                          | return_gi_6_2      | Turning of stomach/cramping/abdo pain                                                                                                              |                                                                                                                                                                                                                                                                                                                                                                                                                                                                                                                                                                                                                                                                                                                                                                                                                                                                                                                                                                                                                                               |   |                    |                                     |   |                    |                                       |   |                    |               |   |                    |                |   |                    |                   |   |                  |                   |   |                  |                     |   |                  |      |   |                  |          |    |                   |         |    |                   |                          |    |                   |                              |    |                   |                  |   |                  |                   |
| 3                                                                                          | return_gi_6_3      | Nausea                                                                                                                                             |                                                                                                                                                                                                                                                                                                                                                                                                                                                                                                                                                                                                                                                                                                                                                                                                                                                                                                                                                                                                                                               |   |                    |                                     |   |                    |                                       |   |                    |               |   |                    |                |   |                    |                   |   |                  |                   |   |                  |                     |   |                  |      |   |                  |          |    |                   |         |    |                   |                          |    |                   |                              |    |                   |                  |   |                  |                   |
| 4                                                                                          | return_gi_6_4      | Vomiting                                                                                                                                           |                                                                                                                                                                                                                                                                                                                                                                                                                                                                                                                                                                                                                                                                                                                                                                                                                                                                                                                                                                                                                                               |   |                    |                                     |   |                    |                                       |   |                    |               |   |                    |                |   |                    |                   |   |                  |                   |   |                  |                     |   |                  |      |   |                  |          |    |                   |         |    |                   |                          |    |                   |                              |    |                   |                  |   |                  |                   |
| 5                                                                                          | return_gi_6_5      | Diarrhea                                                                                                                                           |                                                                                                                                                                                                                                                                                                                                                                                                                                                                                                                                                                                                                                                                                                                                                                                                                                                                                                                                                                                                                                               |   |                    |                                     |   |                    |                                       |   |                    |               |   |                    |                |   |                    |                   |   |                  |                   |   |                  |                     |   |                  |      |   |                  |          |    |                   |         |    |                   |                          |    |                   |                              |    |                   |                  |   |                  |                   |
| 0                                                                                          | return_gi_6_0      | None of the above                                                                                                                                  |                                                                                                                                                                                                                                                                                                                                                                                                                                                                                                                                                                                                                                                                                                                                                                                                                                                                                                                                                                                                                                               |   |                    |                                     |   |                    |                                       |   |                    |               |   |                    |                |   |                    |                   |   |                  |                   |   |                  |                     |   |                  |      |   |                  |          |    |                   |         |    |                   |                          |    |                   |                              |    |                   |                  |   |                  |                   |
| <p><b>1077 return_anxiety_6</b></p> <p>Show the field ONLY if:<br/>[return_wd_6] = '1'</p> |                    | <p><b>Section Header:</b> <i>Return Anxiety 6</i></p> <p><b>Which of the following signs or symptoms of anxiety were documented?</b></p>           | <p><b>checkbox</b></p> <table border="1"> <tr><td>1</td><td>return_anxiety_6_1</td><td>Anxiety, irritability, or agitation</td></tr> <tr><td>2</td><td>return_anxiety_6_2</td><td>Nervousness</td></tr> <tr><td>3</td><td>return_anxiety_6_3</td><td>Tremor</td></tr> <tr><td>4</td><td>return_anxiety_6_4</td><td>Restlessness</td></tr> <tr><td>0</td><td>return_anxiety_6_0</td><td>None of the above</td></tr> </table>                                                                                                                                                                                                                                                                                                                                                                                                                                                                                                                                                                                                                   | 1 | return_anxiety_6_1 | Anxiety, irritability, or agitation | 2 | return_anxiety_6_2 | Nervousness                           | 3 | return_anxiety_6_3 | Tremor        | 4 | return_anxiety_6_4 | Restlessness   | 0 | return_anxiety_6_0 | None of the above |   |                  |                   |   |                  |                     |   |                  |      |   |                  |          |    |                   |         |    |                   |                          |    |                   |                              |    |                   |                  |   |                  |                   |
| 1                                                                                          | return_anxiety_6_1 | Anxiety, irritability, or agitation                                                                                                                |                                                                                                                                                                                                                                                                                                                                                                                                                                                                                                                                                                                                                                                                                                                                                                                                                                                                                                                                                                                                                                               |   |                    |                                     |   |                    |                                       |   |                    |               |   |                    |                |   |                    |                   |   |                  |                   |   |                  |                     |   |                  |      |   |                  |          |    |                   |         |    |                   |                          |    |                   |                              |    |                   |                  |   |                  |                   |
| 2                                                                                          | return_anxiety_6_2 | Nervousness                                                                                                                                        |                                                                                                                                                                                                                                                                                                                                                                                                                                                                                                                                                                                                                                                                                                                                                                                                                                                                                                                                                                                                                                               |   |                    |                                     |   |                    |                                       |   |                    |               |   |                    |                |   |                    |                   |   |                  |                   |   |                  |                     |   |                  |      |   |                  |          |    |                   |         |    |                   |                          |    |                   |                              |    |                   |                  |   |                  |                   |
| 3                                                                                          | return_anxiety_6_3 | Tremor                                                                                                                                             |                                                                                                                                                                                                                                                                                                                                                                                                                                                                                                                                                                                                                                                                                                                                                                                                                                                                                                                                                                                                                                               |   |                    |                                     |   |                    |                                       |   |                    |               |   |                    |                |   |                    |                   |   |                  |                   |   |                  |                     |   |                  |      |   |                  |          |    |                   |         |    |                   |                          |    |                   |                              |    |                   |                  |   |                  |                   |
| 4                                                                                          | return_anxiety_6_4 | Restlessness                                                                                                                                       |                                                                                                                                                                                                                                                                                                                                                                                                                                                                                                                                                                                                                                                                                                                                                                                                                                                                                                                                                                                                                                               |   |                    |                                     |   |                    |                                       |   |                    |               |   |                    |                |   |                    |                   |   |                  |                   |   |                  |                     |   |                  |      |   |                  |          |    |                   |         |    |                   |                          |    |                   |                              |    |                   |                  |   |                  |                   |
| 0                                                                                          | return_anxiety_6_0 | None of the above                                                                                                                                  |                                                                                                                                                                                                                                                                                                                                                                                                                                                                                                                                                                                                                                                                                                                                                                                                                                                                                                                                                                                                                                               |   |                    |                                     |   |                    |                                       |   |                    |               |   |                    |                |   |                    |                   |   |                  |                   |   |                  |                     |   |                  |      |   |                  |          |    |                   |         |    |                   |                          |    |                   |                              |    |                   |                  |   |                  |                   |

|      |                                                                                                     |                                                                                                                                                      |                                                                                                                                                                                                                                                                                                                                                                                                                                                                                                                                                                                                                                                                                                                                                                                                     |   |                       |                          |    |                       |                                    |   |                       |             |   |                       |                        |   |                       |                                           |   |                       |                                             |   |                       |                                                      |   |                       |                   |
|------|-----------------------------------------------------------------------------------------------------|------------------------------------------------------------------------------------------------------------------------------------------------------|-----------------------------------------------------------------------------------------------------------------------------------------------------------------------------------------------------------------------------------------------------------------------------------------------------------------------------------------------------------------------------------------------------------------------------------------------------------------------------------------------------------------------------------------------------------------------------------------------------------------------------------------------------------------------------------------------------------------------------------------------------------------------------------------------------|---|-----------------------|--------------------------|----|-----------------------|------------------------------------|---|-----------------------|-------------|---|-----------------------|------------------------|---|-----------------------|-------------------------------------------|---|-----------------------|---------------------------------------------|---|-----------------------|------------------------------------------------------|---|-----------------------|-------------------|
| 1078 | <b>return_withdrawal_6</b><br><br><b>Show the field ONLY if:</b><br><b>[return_wd_6] = '1'</b>      | <b>Section Header:</b> <i>Return Withdrawal 6</i><br><br><b>Which of the following signs or symptoms of withdrawal were documented?</b>              | <b>checkbox</b><br><table border="1"> <tr> <td>1</td> <td>return_withdrawal_6_1</td> <td>Yawning</td> </tr> <tr> <td>2</td> <td>return_withdrawal_6_2</td> <td>Gooseflesh skin (chills/piloerecti</td> </tr> <tr> <td>3</td> <td>return_withdrawal_6_3</td> <td>Pulse &gt; 80</td> </tr> <tr> <td>4</td> <td>return_withdrawal_6_4</td> <td>Sweating (diaphoresis)</td> </tr> <tr> <td>5</td> <td>return_withdrawal_6_5</td> <td>Pupil size larger normal (dilation/mydria</td> </tr> <tr> <td>6</td> <td>return_withdrawal_6_6</td> <td>Bone, jointache body aches (arthralgias/mya</td> </tr> <tr> <td>7</td> <td>return_withdrawal_6_7</td> <td>Runny nose or tearing (rhinorr or lacrimation)</td> </tr> <tr> <td>0</td> <td>return_withdrawal_6_0</td> <td>None of the abo</td> </tr> </table> | 1 | return_withdrawal_6_1 | Yawning                  | 2  | return_withdrawal_6_2 | Gooseflesh skin (chills/piloerecti | 3 | return_withdrawal_6_3 | Pulse > 80  | 4 | return_withdrawal_6_4 | Sweating (diaphoresis) | 5 | return_withdrawal_6_5 | Pupil size larger normal (dilation/mydria | 6 | return_withdrawal_6_6 | Bone, jointache body aches (arthralgias/mya | 7 | return_withdrawal_6_7 | Runny nose or tearing (rhinorr or lacrimation)       | 0 | return_withdrawal_6_0 | None of the abo   |
| 1    | return_withdrawal_6_1                                                                               | Yawning                                                                                                                                              |                                                                                                                                                                                                                                                                                                                                                                                                                                                                                                                                                                                                                                                                                                                                                                                                     |   |                       |                          |    |                       |                                    |   |                       |             |   |                       |                        |   |                       |                                           |   |                       |                                             |   |                       |                                                      |   |                       |                   |
| 2    | return_withdrawal_6_2                                                                               | Gooseflesh skin (chills/piloerecti                                                                                                                   |                                                                                                                                                                                                                                                                                                                                                                                                                                                                                                                                                                                                                                                                                                                                                                                                     |   |                       |                          |    |                       |                                    |   |                       |             |   |                       |                        |   |                       |                                           |   |                       |                                             |   |                       |                                                      |   |                       |                   |
| 3    | return_withdrawal_6_3                                                                               | Pulse > 80                                                                                                                                           |                                                                                                                                                                                                                                                                                                                                                                                                                                                                                                                                                                                                                                                                                                                                                                                                     |   |                       |                          |    |                       |                                    |   |                       |             |   |                       |                        |   |                       |                                           |   |                       |                                             |   |                       |                                                      |   |                       |                   |
| 4    | return_withdrawal_6_4                                                                               | Sweating (diaphoresis)                                                                                                                               |                                                                                                                                                                                                                                                                                                                                                                                                                                                                                                                                                                                                                                                                                                                                                                                                     |   |                       |                          |    |                       |                                    |   |                       |             |   |                       |                        |   |                       |                                           |   |                       |                                             |   |                       |                                                      |   |                       |                   |
| 5    | return_withdrawal_6_5                                                                               | Pupil size larger normal (dilation/mydria                                                                                                            |                                                                                                                                                                                                                                                                                                                                                                                                                                                                                                                                                                                                                                                                                                                                                                                                     |   |                       |                          |    |                       |                                    |   |                       |             |   |                       |                        |   |                       |                                           |   |                       |                                             |   |                       |                                                      |   |                       |                   |
| 6    | return_withdrawal_6_6                                                                               | Bone, jointache body aches (arthralgias/mya                                                                                                          |                                                                                                                                                                                                                                                                                                                                                                                                                                                                                                                                                                                                                                                                                                                                                                                                     |   |                       |                          |    |                       |                                    |   |                       |             |   |                       |                        |   |                       |                                           |   |                       |                                             |   |                       |                                                      |   |                       |                   |
| 7    | return_withdrawal_6_7                                                                               | Runny nose or tearing (rhinorr or lacrimation)                                                                                                       |                                                                                                                                                                                                                                                                                                                                                                                                                                                                                                                                                                                                                                                                                                                                                                                                     |   |                       |                          |    |                       |                                    |   |                       |             |   |                       |                        |   |                       |                                           |   |                       |                                             |   |                       |                                                      |   |                       |                   |
| 0    | return_withdrawal_6_0                                                                               | None of the abo                                                                                                                                      |                                                                                                                                                                                                                                                                                                                                                                                                                                                                                                                                                                                                                                                                                                                                                                                                     |   |                       |                          |    |                       |                                    |   |                       |             |   |                       |                        |   |                       |                                           |   |                       |                                             |   |                       |                                                      |   |                       |                   |
| 1079 | <b>return_vitals_6</b><br><br><b>Show the field ONLY if:</b><br><b>[return_wd_6] = '1'</b>          | <b>Section Header:</b> <i>Return Abnormal Vitals 6</i><br><br><b>Which of the following abnormal vital signs were documented?</b>                    | <b>checkbox</b><br><table border="1"> <tr> <td>1</td> <td>return_vitals_6_1</td> <td>Hypoxia</td> </tr> <tr> <td>2</td> <td>return_vitals_6_2</td> <td>Hypercarbia</td> </tr> <tr> <td>3</td> <td>return_vitals_6_3</td> <td>Hypotension</td> </tr> <tr> <td>4</td> <td>return_vitals_6_4</td> <td>Bradycardia</td> </tr> <tr> <td>0</td> <td>return_vitals_6_0</td> <td>None of the above</td> </tr> </table>                                                                                                                                                                                                                                                                                                                                                                                      | 1 | return_vitals_6_1     | Hypoxia                  | 2  | return_vitals_6_2     | Hypercarbia                        | 3 | return_vitals_6_3     | Hypotension | 4 | return_vitals_6_4     | Bradycardia            | 0 | return_vitals_6_0     | None of the above                         |   |                       |                                             |   |                       |                                                      |   |                       |                   |
| 1    | return_vitals_6_1                                                                                   | Hypoxia                                                                                                                                              |                                                                                                                                                                                                                                                                                                                                                                                                                                                                                                                                                                                                                                                                                                                                                                                                     |   |                       |                          |    |                       |                                    |   |                       |             |   |                       |                        |   |                       |                                           |   |                       |                                             |   |                       |                                                      |   |                       |                   |
| 2    | return_vitals_6_2                                                                                   | Hypercarbia                                                                                                                                          |                                                                                                                                                                                                                                                                                                                                                                                                                                                                                                                                                                                                                                                                                                                                                                                                     |   |                       |                          |    |                       |                                    |   |                       |             |   |                       |                        |   |                       |                                           |   |                       |                                             |   |                       |                                                      |   |                       |                   |
| 3    | return_vitals_6_3                                                                                   | Hypotension                                                                                                                                          |                                                                                                                                                                                                                                                                                                                                                                                                                                                                                                                                                                                                                                                                                                                                                                                                     |   |                       |                          |    |                       |                                    |   |                       |             |   |                       |                        |   |                       |                                           |   |                       |                                             |   |                       |                                                      |   |                       |                   |
| 4    | return_vitals_6_4                                                                                   | Bradycardia                                                                                                                                          |                                                                                                                                                                                                                                                                                                                                                                                                                                                                                                                                                                                                                                                                                                                                                                                                     |   |                       |                          |    |                       |                                    |   |                       |             |   |                       |                        |   |                       |                                           |   |                       |                                             |   |                       |                                                      |   |                       |                   |
| 0    | return_vitals_6_0                                                                                   | None of the above                                                                                                                                    |                                                                                                                                                                                                                                                                                                                                                                                                                                                                                                                                                                                                                                                                                                                                                                                                     |   |                       |                          |    |                       |                                    |   |                       |             |   |                       |                        |   |                       |                                           |   |                       |                                             |   |                       |                                                      |   |                       |                   |
| 1080 | <b>return_misc_6</b><br><br><b>Show the field ONLY if:</b><br><b>[return_wd_6] = '1'</b>            | <b>Section Header:</b> <i>Return Miscellaneous 6</i><br><br><b>Which of the following miscellaneous opioid related side effects were documented?</b> | <b>checkbox</b><br><table border="1"> <tr> <td>1</td> <td>return_misc_6_1</td> <td>Difficulty passing urine</td> </tr> <tr> <td>2</td> <td>return_misc_6_2</td> <td>Itchiness</td> </tr> <tr> <td>3</td> <td>return_misc_6_3</td> <td>Dry mouth</td> </tr> <tr> <td>4</td> <td>return_misc_6_4</td> <td>Headache</td> </tr> <tr> <td>5</td> <td>return_misc_6_5</td> <td>Unable to walk</td> </tr> <tr> <td>6</td> <td>return_misc_6_6</td> <td>Unable to discharge</td> </tr> <tr> <td>7</td> <td>return_misc_6_7</td> <td>Pupil size smaller than normal (constriction/miosis)</td> </tr> <tr> <td>0</td> <td>return_misc_6_0</td> <td>None of the above</td> </tr> </table>                                                                                                                      | 1 | return_misc_6_1       | Difficulty passing urine | 2  | return_misc_6_2       | Itchiness                          | 3 | return_misc_6_3       | Dry mouth   | 4 | return_misc_6_4       | Headache               | 5 | return_misc_6_5       | Unable to walk                            | 6 | return_misc_6_6       | Unable to discharge                         | 7 | return_misc_6_7       | Pupil size smaller than normal (constriction/miosis) | 0 | return_misc_6_0       | None of the above |
| 1    | return_misc_6_1                                                                                     | Difficulty passing urine                                                                                                                             |                                                                                                                                                                                                                                                                                                                                                                                                                                                                                                                                                                                                                                                                                                                                                                                                     |   |                       |                          |    |                       |                                    |   |                       |             |   |                       |                        |   |                       |                                           |   |                       |                                             |   |                       |                                                      |   |                       |                   |
| 2    | return_misc_6_2                                                                                     | Itchiness                                                                                                                                            |                                                                                                                                                                                                                                                                                                                                                                                                                                                                                                                                                                                                                                                                                                                                                                                                     |   |                       |                          |    |                       |                                    |   |                       |             |   |                       |                        |   |                       |                                           |   |                       |                                             |   |                       |                                                      |   |                       |                   |
| 3    | return_misc_6_3                                                                                     | Dry mouth                                                                                                                                            |                                                                                                                                                                                                                                                                                                                                                                                                                                                                                                                                                                                                                                                                                                                                                                                                     |   |                       |                          |    |                       |                                    |   |                       |             |   |                       |                        |   |                       |                                           |   |                       |                                             |   |                       |                                                      |   |                       |                   |
| 4    | return_misc_6_4                                                                                     | Headache                                                                                                                                             |                                                                                                                                                                                                                                                                                                                                                                                                                                                                                                                                                                                                                                                                                                                                                                                                     |   |                       |                          |    |                       |                                    |   |                       |             |   |                       |                        |   |                       |                                           |   |                       |                                             |   |                       |                                                      |   |                       |                   |
| 5    | return_misc_6_5                                                                                     | Unable to walk                                                                                                                                       |                                                                                                                                                                                                                                                                                                                                                                                                                                                                                                                                                                                                                                                                                                                                                                                                     |   |                       |                          |    |                       |                                    |   |                       |             |   |                       |                        |   |                       |                                           |   |                       |                                             |   |                       |                                                      |   |                       |                   |
| 6    | return_misc_6_6                                                                                     | Unable to discharge                                                                                                                                  |                                                                                                                                                                                                                                                                                                                                                                                                                                                                                                                                                                                                                                                                                                                                                                                                     |   |                       |                          |    |                       |                                    |   |                       |             |   |                       |                        |   |                       |                                           |   |                       |                                             |   |                       |                                                      |   |                       |                   |
| 7    | return_misc_6_7                                                                                     | Pupil size smaller than normal (constriction/miosis)                                                                                                 |                                                                                                                                                                                                                                                                                                                                                                                                                                                                                                                                                                                                                                                                                                                                                                                                     |   |                       |                          |    |                       |                                    |   |                       |             |   |                       |                        |   |                       |                                           |   |                       |                                             |   |                       |                                                      |   |                       |                   |
| 0    | return_misc_6_0                                                                                     | None of the above                                                                                                                                    |                                                                                                                                                                                                                                                                                                                                                                                                                                                                                                                                                                                                                                                                                                                                                                                                     |   |                       |                          |    |                       |                                    |   |                       |             |   |                       |                        |   |                       |                                           |   |                       |                                             |   |                       |                                                      |   |                       |                   |
| 1081 | <b>datetime_return_7</b><br><br><b>Show the field ONLY if:</b><br><b>[return_num] = '7'</b>         | <b>Section Header:</b> <i>Seventh Return Visit</i><br><br><b>Date and time of arrival</b>                                                            | <b>text (datetime_mdy)</b>                                                                                                                                                                                                                                                                                                                                                                                                                                                                                                                                                                                                                                                                                                                                                                          |   |                       |                          |    |                       |                                    |   |                       |             |   |                       |                        |   |                       |                                           |   |                       |                                             |   |                       |                                                      |   |                       |                   |
| 1082 | <b>return_redcap_7</b><br><br><b>Show the field ONLY if:</b><br><b>[return_num] = '7'</b>           | <b>Does this encounter coincide with an existing visit in REDCap?</b>                                                                                | <b>yesno</b><br><table border="1"> <tr> <td>1</td> <td>Yes</td> </tr> <tr> <td>0</td> <td>No</td> </tr> </table>                                                                                                                                                                                                                                                                                                                                                                                                                                                                                                                                                                                                                                                                                    | 1 | Yes                   | 0                        | No |                       |                                    |   |                       |             |   |                       |                        |   |                       |                                           |   |                       |                                             |   |                       |                                                      |   |                       |                   |
| 1    | Yes                                                                                                 |                                                                                                                                                      |                                                                                                                                                                                                                                                                                                                                                                                                                                                                                                                                                                                                                                                                                                                                                                                                     |   |                       |                          |    |                       |                                    |   |                       |             |   |                       |                        |   |                       |                                           |   |                       |                                             |   |                       |                                                      |   |                       |                   |
| 0    | No                                                                                                  |                                                                                                                                                      |                                                                                                                                                                                                                                                                                                                                                                                                                                                                                                                                                                                                                                                                                                                                                                                                     |   |                       |                          |    |                       |                                    |   |                       |             |   |                       |                        |   |                       |                                           |   |                       |                                             |   |                       |                                                      |   |                       |                   |
| 1083 | <b>return_redcap_spec_7</b><br><br><b>Show the field ONLY if:</b><br><b>[return_redcap_7] = '1'</b> | <b>Please enter the visit number</b>                                                                                                                 | <b>text</b>                                                                                                                                                                                                                                                                                                                                                                                                                                                                                                                                                                                                                                                                                                                                                                                         |   |                       |                          |    |                       |                                    |   |                       |             |   |                       |                        |   |                       |                                           |   |                       |                                             |   |                       |                                                      |   |                       |                   |

| 1084                                   | <b>return_od_7</b><br>Show the field ONLY if:<br>[return_num] = '7'                       | <b>Did the patient present to the ED for opioid overdose?</b>                                                 | <b>yesno</b><br><table border="1" data-bbox="1047 100 1140 197"> <tr> <td>1</td> <td>Yes</td> </tr> <tr> <td>0</td> <td>No</td> </tr> </table>                                                                                                                                                                                                                                                                                                                                                                                                                                                                                                                                                                                                                                                                                                                                                                                                                                                                                                                                        | 1        | Yes | 0 | No |                      |                                   |   |                      |                                       |   |                      |                                    |   |                      |                              |   |                      |                                   |   |                      |          |   |                      |            |   |                      |         |   |                      |         |    |                       |                 |    |                       |                         |                                        |  |  |
|----------------------------------------|-------------------------------------------------------------------------------------------|---------------------------------------------------------------------------------------------------------------|---------------------------------------------------------------------------------------------------------------------------------------------------------------------------------------------------------------------------------------------------------------------------------------------------------------------------------------------------------------------------------------------------------------------------------------------------------------------------------------------------------------------------------------------------------------------------------------------------------------------------------------------------------------------------------------------------------------------------------------------------------------------------------------------------------------------------------------------------------------------------------------------------------------------------------------------------------------------------------------------------------------------------------------------------------------------------------------|----------|-----|---|----|----------------------|-----------------------------------|---|----------------------|---------------------------------------|---|----------------------|------------------------------------|---|----------------------|------------------------------|---|----------------------|-----------------------------------|---|----------------------|----------|---|----------------------|------------|---|----------------------|---------|---|----------------------|---------|----|-----------------------|-----------------|----|-----------------------|-------------------------|----------------------------------------|--|--|
| 1                                      | Yes                                                                                       |                                                                                                               |                                                                                                                                                                                                                                                                                                                                                                                                                                                                                                                                                                                                                                                                                                                                                                                                                                                                                                                                                                                                                                                                                       |          |     |   |    |                      |                                   |   |                      |                                       |   |                      |                                    |   |                      |                              |   |                      |                                   |   |                      |          |   |                      |            |   |                      |         |   |                      |         |    |                       |                 |    |                       |                         |                                        |  |  |
| 0                                      | No                                                                                        |                                                                                                               |                                                                                                                                                                                                                                                                                                                                                                                                                                                                                                                                                                                                                                                                                                                                                                                                                                                                                                                                                                                                                                                                                       |          |     |   |    |                      |                                   |   |                      |                                       |   |                      |                                    |   |                      |                              |   |                      |                                   |   |                      |          |   |                      |            |   |                      |         |   |                      |         |    |                       |                 |    |                       |                         |                                        |  |  |
| 1085                                   | <b>return_illicit_yn_7</b><br>Show the field ONLY if:<br>[return_num] = '7'               | <b>Did the patient or provider report any substance use between the index ED visit and this return visit?</b> | <b>yesno</b><br><table border="1" data-bbox="1047 243 1140 340"> <tr> <td>1</td> <td>Yes</td> </tr> <tr> <td>0</td> <td>No</td> </tr> </table>                                                                                                                                                                                                                                                                                                                                                                                                                                                                                                                                                                                                                                                                                                                                                                                                                                                                                                                                        | 1        | Yes | 0 | No |                      |                                   |   |                      |                                       |   |                      |                                    |   |                      |                              |   |                      |                                   |   |                      |          |   |                      |            |   |                      |         |   |                      |         |    |                       |                 |    |                       |                         |                                        |  |  |
| 1                                      | Yes                                                                                       |                                                                                                               |                                                                                                                                                                                                                                                                                                                                                                                                                                                                                                                                                                                                                                                                                                                                                                                                                                                                                                                                                                                                                                                                                       |          |     |   |    |                      |                                   |   |                      |                                       |   |                      |                                    |   |                      |                              |   |                      |                                   |   |                      |          |   |                      |            |   |                      |         |   |                      |         |    |                       |                 |    |                       |                         |                                        |  |  |
| 0                                      | No                                                                                        |                                                                                                               |                                                                                                                                                                                                                                                                                                                                                                                                                                                                                                                                                                                                                                                                                                                                                                                                                                                                                                                                                                                                                                                                                       |          |     |   |    |                      |                                   |   |                      |                                       |   |                      |                                    |   |                      |                              |   |                      |                                   |   |                      |          |   |                      |            |   |                      |         |   |                      |         |    |                       |                 |    |                       |                         |                                        |  |  |
| 1086                                   | <b>return_substance_7</b><br>Show the field ONLY if:<br>[return_illicit_yn_7] = '1'       | <b>Which substance(s) did the patient use?</b>                                                                | <table border="1" data-bbox="1047 407 1526 1176"> <thead> <tr> <th colspan="3">checkbox</th> </tr> </thead> <tbody> <tr> <td>1</td> <td>return_substance_7_1</td> <td>Opioids (not including buprenorph</td> </tr> <tr> <td>2</td> <td>return_substance_7_2</td> <td>Methamphe</td> </tr> <tr> <td>3</td> <td>return_substance_7_3</td> <td>Cocaine</td> </tr> <tr> <td>4</td> <td>return_substance_7_4</td> <td>Cannabis</td> </tr> <tr> <td>5</td> <td>return_substance_7_5</td> <td>Hallucinoge (including Ecstasy/MD</td> </tr> <tr> <td>6</td> <td>return_substance_7_6</td> <td>LSD</td> </tr> <tr> <td>7</td> <td>return_substance_7_7</td> <td>Benzodiaze</td> </tr> <tr> <td>8</td> <td>return_substance_7_8</td> <td>Alcohol</td> </tr> <tr> <td>9</td> <td>return_substance_7_9</td> <td>Tobacco</td> </tr> <tr> <td>10</td> <td>return_substance_7_10</td> <td>Other stimu NOS</td> </tr> <tr> <td>11</td> <td>return_substance_7_11</td> <td>Other (note heavy usage</td> </tr> <tr> <td colspan="3">999 return_substance_7_999 None of the</td> </tr> </tbody> </table> | checkbox |     |   | 1  | return_substance_7_1 | Opioids (not including buprenorph | 2 | return_substance_7_2 | Methamphe                             | 3 | return_substance_7_3 | Cocaine                            | 4 | return_substance_7_4 | Cannabis                     | 5 | return_substance_7_5 | Hallucinoge (including Ecstasy/MD | 6 | return_substance_7_6 | LSD      | 7 | return_substance_7_7 | Benzodiaze | 8 | return_substance_7_8 | Alcohol | 9 | return_substance_7_9 | Tobacco | 10 | return_substance_7_10 | Other stimu NOS | 11 | return_substance_7_11 | Other (note heavy usage | 999 return_substance_7_999 None of the |  |  |
| checkbox                               |                                                                                           |                                                                                                               |                                                                                                                                                                                                                                                                                                                                                                                                                                                                                                                                                                                                                                                                                                                                                                                                                                                                                                                                                                                                                                                                                       |          |     |   |    |                      |                                   |   |                      |                                       |   |                      |                                    |   |                      |                              |   |                      |                                   |   |                      |          |   |                      |            |   |                      |         |   |                      |         |    |                       |                 |    |                       |                         |                                        |  |  |
| 1                                      | return_substance_7_1                                                                      | Opioids (not including buprenorph                                                                             |                                                                                                                                                                                                                                                                                                                                                                                                                                                                                                                                                                                                                                                                                                                                                                                                                                                                                                                                                                                                                                                                                       |          |     |   |    |                      |                                   |   |                      |                                       |   |                      |                                    |   |                      |                              |   |                      |                                   |   |                      |          |   |                      |            |   |                      |         |   |                      |         |    |                       |                 |    |                       |                         |                                        |  |  |
| 2                                      | return_substance_7_2                                                                      | Methamphe                                                                                                     |                                                                                                                                                                                                                                                                                                                                                                                                                                                                                                                                                                                                                                                                                                                                                                                                                                                                                                                                                                                                                                                                                       |          |     |   |    |                      |                                   |   |                      |                                       |   |                      |                                    |   |                      |                              |   |                      |                                   |   |                      |          |   |                      |            |   |                      |         |   |                      |         |    |                       |                 |    |                       |                         |                                        |  |  |
| 3                                      | return_substance_7_3                                                                      | Cocaine                                                                                                       |                                                                                                                                                                                                                                                                                                                                                                                                                                                                                                                                                                                                                                                                                                                                                                                                                                                                                                                                                                                                                                                                                       |          |     |   |    |                      |                                   |   |                      |                                       |   |                      |                                    |   |                      |                              |   |                      |                                   |   |                      |          |   |                      |            |   |                      |         |   |                      |         |    |                       |                 |    |                       |                         |                                        |  |  |
| 4                                      | return_substance_7_4                                                                      | Cannabis                                                                                                      |                                                                                                                                                                                                                                                                                                                                                                                                                                                                                                                                                                                                                                                                                                                                                                                                                                                                                                                                                                                                                                                                                       |          |     |   |    |                      |                                   |   |                      |                                       |   |                      |                                    |   |                      |                              |   |                      |                                   |   |                      |          |   |                      |            |   |                      |         |   |                      |         |    |                       |                 |    |                       |                         |                                        |  |  |
| 5                                      | return_substance_7_5                                                                      | Hallucinoge (including Ecstasy/MD                                                                             |                                                                                                                                                                                                                                                                                                                                                                                                                                                                                                                                                                                                                                                                                                                                                                                                                                                                                                                                                                                                                                                                                       |          |     |   |    |                      |                                   |   |                      |                                       |   |                      |                                    |   |                      |                              |   |                      |                                   |   |                      |          |   |                      |            |   |                      |         |   |                      |         |    |                       |                 |    |                       |                         |                                        |  |  |
| 6                                      | return_substance_7_6                                                                      | LSD                                                                                                           |                                                                                                                                                                                                                                                                                                                                                                                                                                                                                                                                                                                                                                                                                                                                                                                                                                                                                                                                                                                                                                                                                       |          |     |   |    |                      |                                   |   |                      |                                       |   |                      |                                    |   |                      |                              |   |                      |                                   |   |                      |          |   |                      |            |   |                      |         |   |                      |         |    |                       |                 |    |                       |                         |                                        |  |  |
| 7                                      | return_substance_7_7                                                                      | Benzodiaze                                                                                                    |                                                                                                                                                                                                                                                                                                                                                                                                                                                                                                                                                                                                                                                                                                                                                                                                                                                                                                                                                                                                                                                                                       |          |     |   |    |                      |                                   |   |                      |                                       |   |                      |                                    |   |                      |                              |   |                      |                                   |   |                      |          |   |                      |            |   |                      |         |   |                      |         |    |                       |                 |    |                       |                         |                                        |  |  |
| 8                                      | return_substance_7_8                                                                      | Alcohol                                                                                                       |                                                                                                                                                                                                                                                                                                                                                                                                                                                                                                                                                                                                                                                                                                                                                                                                                                                                                                                                                                                                                                                                                       |          |     |   |    |                      |                                   |   |                      |                                       |   |                      |                                    |   |                      |                              |   |                      |                                   |   |                      |          |   |                      |            |   |                      |         |   |                      |         |    |                       |                 |    |                       |                         |                                        |  |  |
| 9                                      | return_substance_7_9                                                                      | Tobacco                                                                                                       |                                                                                                                                                                                                                                                                                                                                                                                                                                                                                                                                                                                                                                                                                                                                                                                                                                                                                                                                                                                                                                                                                       |          |     |   |    |                      |                                   |   |                      |                                       |   |                      |                                    |   |                      |                              |   |                      |                                   |   |                      |          |   |                      |            |   |                      |         |   |                      |         |    |                       |                 |    |                       |                         |                                        |  |  |
| 10                                     | return_substance_7_10                                                                     | Other stimu NOS                                                                                               |                                                                                                                                                                                                                                                                                                                                                                                                                                                                                                                                                                                                                                                                                                                                                                                                                                                                                                                                                                                                                                                                                       |          |     |   |    |                      |                                   |   |                      |                                       |   |                      |                                    |   |                      |                              |   |                      |                                   |   |                      |          |   |                      |            |   |                      |         |   |                      |         |    |                       |                 |    |                       |                         |                                        |  |  |
| 11                                     | return_substance_7_11                                                                     | Other (note heavy usage                                                                                       |                                                                                                                                                                                                                                                                                                                                                                                                                                                                                                                                                                                                                                                                                                                                                                                                                                                                                                                                                                                                                                                                                       |          |     |   |    |                      |                                   |   |                      |                                       |   |                      |                                    |   |                      |                              |   |                      |                                   |   |                      |          |   |                      |            |   |                      |         |   |                      |         |    |                       |                 |    |                       |                         |                                        |  |  |
| 999 return_substance_7_999 None of the |                                                                                           |                                                                                                               |                                                                                                                                                                                                                                                                                                                                                                                                                                                                                                                                                                                                                                                                                                                                                                                                                                                                                                                                                                                                                                                                                       |          |     |   |    |                      |                                   |   |                      |                                       |   |                      |                                    |   |                      |                              |   |                      |                                   |   |                      |          |   |                      |            |   |                      |         |   |                      |         |    |                       |                 |    |                       |                         |                                        |  |  |
| 1087                                   | <b>return_substance_oth_7</b><br>Show the field ONLY if:<br>[return_substance_7(1)] = '1' | <b>If "Other," please specify.</b>                                                                            | <b>text</b>                                                                                                                                                                                                                                                                                                                                                                                                                                                                                                                                                                                                                                                                                                                                                                                                                                                                                                                                                                                                                                                                           |          |     |   |    |                      |                                   |   |                      |                                       |   |                      |                                    |   |                      |                              |   |                      |                                   |   |                      |          |   |                      |            |   |                      |         |   |                      |         |    |                       |                 |    |                       |                         |                                        |  |  |
| 1088                                   | <b>return_opioid_7</b><br>Show the field ONLY if:<br>[return_substance_7(1)] = '1'        | <b>Which opioid(s) did the patient use?</b>                                                                   | <table border="1" data-bbox="1047 1392 1526 1955"> <thead> <tr> <th colspan="3">checkbox</th> </tr> </thead> <tbody> <tr> <td>1</td> <td>return_opioid_7_1</td> <td>Heroin</td> </tr> <tr> <td>2</td> <td>return_opioid_7_2</td> <td>Oxycodone (OxyContin, Percocet, etc.)</td> </tr> <tr> <td>3</td> <td>return_opioid_7_3</td> <td>Hydrocodone (Norco, Vicodin, etc.)</td> </tr> <tr> <td>4</td> <td>return_opioid_7_4</td> <td>Fentanyl (Duragesic, Ionsys)</td> </tr> <tr> <td>5</td> <td>return_opioid_7_5</td> <td>Hydromorphone (Dilaudid)</td> </tr> <tr> <td>6</td> <td>return_opioid_7_6</td> <td>Morphine</td> </tr> <tr> <td>7</td> <td>return_opioid_7_7</td> <td>Other</td> </tr> </tbody> </table>                                                                                                                                                                                                                                                                                                                                                                     | checkbox |     |   | 1  | return_opioid_7_1    | Heroin                            | 2 | return_opioid_7_2    | Oxycodone (OxyContin, Percocet, etc.) | 3 | return_opioid_7_3    | Hydrocodone (Norco, Vicodin, etc.) | 4 | return_opioid_7_4    | Fentanyl (Duragesic, Ionsys) | 5 | return_opioid_7_5    | Hydromorphone (Dilaudid)          | 6 | return_opioid_7_6    | Morphine | 7 | return_opioid_7_7    | Other      |   |                      |         |   |                      |         |    |                       |                 |    |                       |                         |                                        |  |  |
| checkbox                               |                                                                                           |                                                                                                               |                                                                                                                                                                                                                                                                                                                                                                                                                                                                                                                                                                                                                                                                                                                                                                                                                                                                                                                                                                                                                                                                                       |          |     |   |    |                      |                                   |   |                      |                                       |   |                      |                                    |   |                      |                              |   |                      |                                   |   |                      |          |   |                      |            |   |                      |         |   |                      |         |    |                       |                 |    |                       |                         |                                        |  |  |
| 1                                      | return_opioid_7_1                                                                         | Heroin                                                                                                        |                                                                                                                                                                                                                                                                                                                                                                                                                                                                                                                                                                                                                                                                                                                                                                                                                                                                                                                                                                                                                                                                                       |          |     |   |    |                      |                                   |   |                      |                                       |   |                      |                                    |   |                      |                              |   |                      |                                   |   |                      |          |   |                      |            |   |                      |         |   |                      |         |    |                       |                 |    |                       |                         |                                        |  |  |
| 2                                      | return_opioid_7_2                                                                         | Oxycodone (OxyContin, Percocet, etc.)                                                                         |                                                                                                                                                                                                                                                                                                                                                                                                                                                                                                                                                                                                                                                                                                                                                                                                                                                                                                                                                                                                                                                                                       |          |     |   |    |                      |                                   |   |                      |                                       |   |                      |                                    |   |                      |                              |   |                      |                                   |   |                      |          |   |                      |            |   |                      |         |   |                      |         |    |                       |                 |    |                       |                         |                                        |  |  |
| 3                                      | return_opioid_7_3                                                                         | Hydrocodone (Norco, Vicodin, etc.)                                                                            |                                                                                                                                                                                                                                                                                                                                                                                                                                                                                                                                                                                                                                                                                                                                                                                                                                                                                                                                                                                                                                                                                       |          |     |   |    |                      |                                   |   |                      |                                       |   |                      |                                    |   |                      |                              |   |                      |                                   |   |                      |          |   |                      |            |   |                      |         |   |                      |         |    |                       |                 |    |                       |                         |                                        |  |  |
| 4                                      | return_opioid_7_4                                                                         | Fentanyl (Duragesic, Ionsys)                                                                                  |                                                                                                                                                                                                                                                                                                                                                                                                                                                                                                                                                                                                                                                                                                                                                                                                                                                                                                                                                                                                                                                                                       |          |     |   |    |                      |                                   |   |                      |                                       |   |                      |                                    |   |                      |                              |   |                      |                                   |   |                      |          |   |                      |            |   |                      |         |   |                      |         |    |                       |                 |    |                       |                         |                                        |  |  |
| 5                                      | return_opioid_7_5                                                                         | Hydromorphone (Dilaudid)                                                                                      |                                                                                                                                                                                                                                                                                                                                                                                                                                                                                                                                                                                                                                                                                                                                                                                                                                                                                                                                                                                                                                                                                       |          |     |   |    |                      |                                   |   |                      |                                       |   |                      |                                    |   |                      |                              |   |                      |                                   |   |                      |          |   |                      |            |   |                      |         |   |                      |         |    |                       |                 |    |                       |                         |                                        |  |  |
| 6                                      | return_opioid_7_6                                                                         | Morphine                                                                                                      |                                                                                                                                                                                                                                                                                                                                                                                                                                                                                                                                                                                                                                                                                                                                                                                                                                                                                                                                                                                                                                                                                       |          |     |   |    |                      |                                   |   |                      |                                       |   |                      |                                    |   |                      |                              |   |                      |                                   |   |                      |          |   |                      |            |   |                      |         |   |                      |         |    |                       |                 |    |                       |                         |                                        |  |  |
| 7                                      | return_opioid_7_7                                                                         | Other                                                                                                         |                                                                                                                                                                                                                                                                                                                                                                                                                                                                                                                                                                                                                                                                                                                                                                                                                                                                                                                                                                                                                                                                                       |          |     |   |    |                      |                                   |   |                      |                                       |   |                      |                                    |   |                      |                              |   |                      |                                   |   |                      |          |   |                      |            |   |                      |         |   |                      |         |    |                       |                 |    |                       |                         |                                        |  |  |



|      |                                                                                |                                                                                                                                                                                                                                                 |                                                                                                                                                                                                                                                                                                                                                                                                                                                                                                                                                 |
|------|--------------------------------------------------------------------------------|-------------------------------------------------------------------------------------------------------------------------------------------------------------------------------------------------------------------------------------------------|-------------------------------------------------------------------------------------------------------------------------------------------------------------------------------------------------------------------------------------------------------------------------------------------------------------------------------------------------------------------------------------------------------------------------------------------------------------------------------------------------------------------------------------------------|
| 1089 | return_opioid_oth_7<br>Show the field ONLY if:<br>[return_opioid_7(7)] = '1'   | If "Other," please specify.                                                                                                                                                                                                                     | text                                                                                                                                                                                                                                                                                                                                                                                                                                                                                                                                            |
| 1090 | return_utox_7<br>Show the field ONLY if:<br>[return_num] = '7'                 | Was a urine toxicology screen performed for this visit?                                                                                                                                                                                         | yesno<br>1 Yes<br>0 No                                                                                                                                                                                                                                                                                                                                                                                                                                                                                                                          |
| 1091 | return_utox_spec_7<br>Show the field ONLY if:<br>[return_utox_7] = '1'         | Please select all drugs shown to be positive in the urine toxicology analysis:                                                                                                                                                                  | checkbox<br>1 return_utox_spec_7_1 Amphetami<br>2 return_utox_spec_7_2 Barbiturates<br>3 return_utox_spec_7_3 Cocaine<br>4 return_utox_spec_7_4 Methaqualo<br>5 return_utox_spec_7_5 Methadone<br>6 return_utox_spec_7_6 Methamphe<br>7 return_utox_spec_7_7 Opiates<br>8 return_utox_spec_7_8 Phencyclidin<br>9 return_utox_spec_7_9 Marijuana<br>10 return_utox_spec_7_10 Benzodiazep<br>11 return_utox_spec_7_11 Propoxyph<br>12 return_utox_spec_7_12 Amphetami<br>13 return_utox_spec_7_13 Other<br>999 return_utox_spec_7_999 None of the |
| 1092 | return_utox_oth_7<br>Show the field ONLY if:<br>[return_utox_spec_7(13)] = '1' | If "Other," please specify                                                                                                                                                                                                                      | text                                                                                                                                                                                                                                                                                                                                                                                                                                                                                                                                            |
| 1093 | return_craving_7<br>Show the field ONLY if:<br>[return_num] = '7'              | Did the patient or provider mention opioid cravings during the visit?                                                                                                                                                                           | yesno<br>1 Yes<br>0 No                                                                                                                                                                                                                                                                                                                                                                                                                                                                                                                          |
| 1094 | return_wd_7<br>Show the field ONLY if:<br>[return_num] = '7'                   | Did the patient complaint about or exhibit any signs or symptoms of withdrawal during this visit?<br><i>If the patient received buprenorphine during this visit, only select signs/symptoms documented BEFORE buprenorphine administration.</i> | yesno<br>1 Yes<br>0 No                                                                                                                                                                                                                                                                                                                                                                                                                                                                                                                          |
| 1095 | return_sedation_7<br>Show the field ONLY if:<br>[return_wd_7] = '1'            | Section Header: Return Sedation 7<br>Which of the following signs or symptoms of sedation were documented?                                                                                                                                      | checkbox<br>1 return_sedation_7_1 Nodding<br>2 return_sedation_7_2 Sleepy, drowsy, difficulty staying awake<br>3 return_sedation_7_3 Feelings of general fatigue or weakness<br>0 return_sedation_7_0 None of the above                                                                                                                                                                                                                                                                                                                         |

|                                                                                            |                    |                                                                                                                                                    |                                                                                                                                                                                                                                                                                                                                                                                                                                                                                                                                                                                                                                                                                                                                                                                                                                                                                                                                                                                                                                               |   |                    |                                     |   |                    |                                       |   |                    |               |   |                    |                |   |                    |                   |   |                  |                   |   |                  |                     |   |                  |      |   |                  |          |    |                   |         |    |                   |                          |    |                   |                              |    |                   |                  |   |                  |                   |
|--------------------------------------------------------------------------------------------|--------------------|----------------------------------------------------------------------------------------------------------------------------------------------------|-----------------------------------------------------------------------------------------------------------------------------------------------------------------------------------------------------------------------------------------------------------------------------------------------------------------------------------------------------------------------------------------------------------------------------------------------------------------------------------------------------------------------------------------------------------------------------------------------------------------------------------------------------------------------------------------------------------------------------------------------------------------------------------------------------------------------------------------------------------------------------------------------------------------------------------------------------------------------------------------------------------------------------------------------|---|--------------------|-------------------------------------|---|--------------------|---------------------------------------|---|--------------------|---------------|---|--------------------|----------------|---|--------------------|-------------------|---|------------------|-------------------|---|------------------|---------------------|---|------------------|------|---|------------------|----------|----|-------------------|---------|----|-------------------|--------------------------|----|-------------------|------------------------------|----|-------------------|------------------|---|------------------|-------------------|
| <p><b>1096 return_intox_7</b></p> <p>Show the field ONLY if:<br/>[return_wd_7] = '1'</p>   |                    | <p><b>Section Header:</b> <i>Return Intoxication 7</i></p> <p><b>Which of the following signs or symptoms of intoxication were documented?</b></p> | <p><b>checkbox</b></p> <table border="1"> <tr><td>1</td><td>return_intox_7_1</td><td>Good mood</td></tr> <tr><td>2</td><td>return_intox_7_2</td><td>Coasting (Spaced out)</td></tr> <tr><td>3</td><td>return_intox_7_3</td><td>Pleasant Sick</td></tr> <tr><td>4</td><td>return_intox_7_4</td><td>Drive (energy)</td></tr> <tr><td>5</td><td>return_intox_7_5</td><td>High</td></tr> <tr><td>6</td><td>return_intox_7_6</td><td>Drunken</td></tr> <tr><td>7</td><td>return_intox_7_7</td><td>Soapbox (talkative)</td></tr> <tr><td>8</td><td>return_intox_7_8</td><td>Rush</td></tr> <tr><td>9</td><td>return_intox_7_9</td><td>Friendly</td></tr> <tr><td>10</td><td>return_intox_7_10</td><td>Relaxed</td></tr> <tr><td>11</td><td>return_intox_7_11</td><td>Difficulty concentrating</td></tr> <tr><td>12</td><td>return_intox_7_12</td><td>Feeling lightheaded or dizzy</td></tr> <tr><td>13</td><td>return_intox_7_13</td><td>Feeling confused</td></tr> <tr><td>0</td><td>return_intox_7_0</td><td>None of the above</td></tr> </table> | 1 | return_intox_7_1   | Good mood                           | 2 | return_intox_7_2   | Coasting (Spaced out)                 | 3 | return_intox_7_3   | Pleasant Sick | 4 | return_intox_7_4   | Drive (energy) | 5 | return_intox_7_5   | High              | 6 | return_intox_7_6 | Drunken           | 7 | return_intox_7_7 | Soapbox (talkative) | 8 | return_intox_7_8 | Rush | 9 | return_intox_7_9 | Friendly | 10 | return_intox_7_10 | Relaxed | 11 | return_intox_7_11 | Difficulty concentrating | 12 | return_intox_7_12 | Feeling lightheaded or dizzy | 13 | return_intox_7_13 | Feeling confused | 0 | return_intox_7_0 | None of the above |
| 1                                                                                          | return_intox_7_1   | Good mood                                                                                                                                          |                                                                                                                                                                                                                                                                                                                                                                                                                                                                                                                                                                                                                                                                                                                                                                                                                                                                                                                                                                                                                                               |   |                    |                                     |   |                    |                                       |   |                    |               |   |                    |                |   |                    |                   |   |                  |                   |   |                  |                     |   |                  |      |   |                  |          |    |                   |         |    |                   |                          |    |                   |                              |    |                   |                  |   |                  |                   |
| 2                                                                                          | return_intox_7_2   | Coasting (Spaced out)                                                                                                                              |                                                                                                                                                                                                                                                                                                                                                                                                                                                                                                                                                                                                                                                                                                                                                                                                                                                                                                                                                                                                                                               |   |                    |                                     |   |                    |                                       |   |                    |               |   |                    |                |   |                    |                   |   |                  |                   |   |                  |                     |   |                  |      |   |                  |          |    |                   |         |    |                   |                          |    |                   |                              |    |                   |                  |   |                  |                   |
| 3                                                                                          | return_intox_7_3   | Pleasant Sick                                                                                                                                      |                                                                                                                                                                                                                                                                                                                                                                                                                                                                                                                                                                                                                                                                                                                                                                                                                                                                                                                                                                                                                                               |   |                    |                                     |   |                    |                                       |   |                    |               |   |                    |                |   |                    |                   |   |                  |                   |   |                  |                     |   |                  |      |   |                  |          |    |                   |         |    |                   |                          |    |                   |                              |    |                   |                  |   |                  |                   |
| 4                                                                                          | return_intox_7_4   | Drive (energy)                                                                                                                                     |                                                                                                                                                                                                                                                                                                                                                                                                                                                                                                                                                                                                                                                                                                                                                                                                                                                                                                                                                                                                                                               |   |                    |                                     |   |                    |                                       |   |                    |               |   |                    |                |   |                    |                   |   |                  |                   |   |                  |                     |   |                  |      |   |                  |          |    |                   |         |    |                   |                          |    |                   |                              |    |                   |                  |   |                  |                   |
| 5                                                                                          | return_intox_7_5   | High                                                                                                                                               |                                                                                                                                                                                                                                                                                                                                                                                                                                                                                                                                                                                                                                                                                                                                                                                                                                                                                                                                                                                                                                               |   |                    |                                     |   |                    |                                       |   |                    |               |   |                    |                |   |                    |                   |   |                  |                   |   |                  |                     |   |                  |      |   |                  |          |    |                   |         |    |                   |                          |    |                   |                              |    |                   |                  |   |                  |                   |
| 6                                                                                          | return_intox_7_6   | Drunken                                                                                                                                            |                                                                                                                                                                                                                                                                                                                                                                                                                                                                                                                                                                                                                                                                                                                                                                                                                                                                                                                                                                                                                                               |   |                    |                                     |   |                    |                                       |   |                    |               |   |                    |                |   |                    |                   |   |                  |                   |   |                  |                     |   |                  |      |   |                  |          |    |                   |         |    |                   |                          |    |                   |                              |    |                   |                  |   |                  |                   |
| 7                                                                                          | return_intox_7_7   | Soapbox (talkative)                                                                                                                                |                                                                                                                                                                                                                                                                                                                                                                                                                                                                                                                                                                                                                                                                                                                                                                                                                                                                                                                                                                                                                                               |   |                    |                                     |   |                    |                                       |   |                    |               |   |                    |                |   |                    |                   |   |                  |                   |   |                  |                     |   |                  |      |   |                  |          |    |                   |         |    |                   |                          |    |                   |                              |    |                   |                  |   |                  |                   |
| 8                                                                                          | return_intox_7_8   | Rush                                                                                                                                               |                                                                                                                                                                                                                                                                                                                                                                                                                                                                                                                                                                                                                                                                                                                                                                                                                                                                                                                                                                                                                                               |   |                    |                                     |   |                    |                                       |   |                    |               |   |                    |                |   |                    |                   |   |                  |                   |   |                  |                     |   |                  |      |   |                  |          |    |                   |         |    |                   |                          |    |                   |                              |    |                   |                  |   |                  |                   |
| 9                                                                                          | return_intox_7_9   | Friendly                                                                                                                                           |                                                                                                                                                                                                                                                                                                                                                                                                                                                                                                                                                                                                                                                                                                                                                                                                                                                                                                                                                                                                                                               |   |                    |                                     |   |                    |                                       |   |                    |               |   |                    |                |   |                    |                   |   |                  |                   |   |                  |                     |   |                  |      |   |                  |          |    |                   |         |    |                   |                          |    |                   |                              |    |                   |                  |   |                  |                   |
| 10                                                                                         | return_intox_7_10  | Relaxed                                                                                                                                            |                                                                                                                                                                                                                                                                                                                                                                                                                                                                                                                                                                                                                                                                                                                                                                                                                                                                                                                                                                                                                                               |   |                    |                                     |   |                    |                                       |   |                    |               |   |                    |                |   |                    |                   |   |                  |                   |   |                  |                     |   |                  |      |   |                  |          |    |                   |         |    |                   |                          |    |                   |                              |    |                   |                  |   |                  |                   |
| 11                                                                                         | return_intox_7_11  | Difficulty concentrating                                                                                                                           |                                                                                                                                                                                                                                                                                                                                                                                                                                                                                                                                                                                                                                                                                                                                                                                                                                                                                                                                                                                                                                               |   |                    |                                     |   |                    |                                       |   |                    |               |   |                    |                |   |                    |                   |   |                  |                   |   |                  |                     |   |                  |      |   |                  |          |    |                   |         |    |                   |                          |    |                   |                              |    |                   |                  |   |                  |                   |
| 12                                                                                         | return_intox_7_12  | Feeling lightheaded or dizzy                                                                                                                       |                                                                                                                                                                                                                                                                                                                                                                                                                                                                                                                                                                                                                                                                                                                                                                                                                                                                                                                                                                                                                                               |   |                    |                                     |   |                    |                                       |   |                    |               |   |                    |                |   |                    |                   |   |                  |                   |   |                  |                     |   |                  |      |   |                  |          |    |                   |         |    |                   |                          |    |                   |                              |    |                   |                  |   |                  |                   |
| 13                                                                                         | return_intox_7_13  | Feeling confused                                                                                                                                   |                                                                                                                                                                                                                                                                                                                                                                                                                                                                                                                                                                                                                                                                                                                                                                                                                                                                                                                                                                                                                                               |   |                    |                                     |   |                    |                                       |   |                    |               |   |                    |                |   |                    |                   |   |                  |                   |   |                  |                     |   |                  |      |   |                  |          |    |                   |         |    |                   |                          |    |                   |                              |    |                   |                  |   |                  |                   |
| 0                                                                                          | return_intox_7_0   | None of the above                                                                                                                                  |                                                                                                                                                                                                                                                                                                                                                                                                                                                                                                                                                                                                                                                                                                                                                                                                                                                                                                                                                                                                                                               |   |                    |                                     |   |                    |                                       |   |                    |               |   |                    |                |   |                    |                   |   |                  |                   |   |                  |                     |   |                  |      |   |                  |          |    |                   |         |    |                   |                          |    |                   |                              |    |                   |                  |   |                  |                   |
| <p><b>1097 return_gi_7</b></p> <p>Show the field ONLY if:<br/>[return_wd_7] = '1'</p>      |                    | <p><b>Section Header:</b> <i>Return GI 7</i></p> <p><b>Which of the following gastrointestinal signs or symptoms were documented?</b></p>          | <p><b>checkbox</b></p> <table border="1"> <tr><td>1</td><td>return_gi_7_1</td><td>Constipation</td></tr> <tr><td>2</td><td>return_gi_7_2</td><td>Turning of stomach/cramping/abdo pain</td></tr> <tr><td>3</td><td>return_gi_7_3</td><td>Nausea</td></tr> <tr><td>4</td><td>return_gi_7_4</td><td>Vomiting</td></tr> <tr><td>5</td><td>return_gi_7_5</td><td>Diarrhea</td></tr> <tr><td>0</td><td>return_gi_7_0</td><td>None of the above</td></tr> </table>                                                                                                                                                                                                                                                                                                                                                                                                                                                                                                                                                                                  | 1 | return_gi_7_1      | Constipation                        | 2 | return_gi_7_2      | Turning of stomach/cramping/abdo pain | 3 | return_gi_7_3      | Nausea        | 4 | return_gi_7_4      | Vomiting       | 5 | return_gi_7_5      | Diarrhea          | 0 | return_gi_7_0    | None of the above |   |                  |                     |   |                  |      |   |                  |          |    |                   |         |    |                   |                          |    |                   |                              |    |                   |                  |   |                  |                   |
| 1                                                                                          | return_gi_7_1      | Constipation                                                                                                                                       |                                                                                                                                                                                                                                                                                                                                                                                                                                                                                                                                                                                                                                                                                                                                                                                                                                                                                                                                                                                                                                               |   |                    |                                     |   |                    |                                       |   |                    |               |   |                    |                |   |                    |                   |   |                  |                   |   |                  |                     |   |                  |      |   |                  |          |    |                   |         |    |                   |                          |    |                   |                              |    |                   |                  |   |                  |                   |
| 2                                                                                          | return_gi_7_2      | Turning of stomach/cramping/abdo pain                                                                                                              |                                                                                                                                                                                                                                                                                                                                                                                                                                                                                                                                                                                                                                                                                                                                                                                                                                                                                                                                                                                                                                               |   |                    |                                     |   |                    |                                       |   |                    |               |   |                    |                |   |                    |                   |   |                  |                   |   |                  |                     |   |                  |      |   |                  |          |    |                   |         |    |                   |                          |    |                   |                              |    |                   |                  |   |                  |                   |
| 3                                                                                          | return_gi_7_3      | Nausea                                                                                                                                             |                                                                                                                                                                                                                                                                                                                                                                                                                                                                                                                                                                                                                                                                                                                                                                                                                                                                                                                                                                                                                                               |   |                    |                                     |   |                    |                                       |   |                    |               |   |                    |                |   |                    |                   |   |                  |                   |   |                  |                     |   |                  |      |   |                  |          |    |                   |         |    |                   |                          |    |                   |                              |    |                   |                  |   |                  |                   |
| 4                                                                                          | return_gi_7_4      | Vomiting                                                                                                                                           |                                                                                                                                                                                                                                                                                                                                                                                                                                                                                                                                                                                                                                                                                                                                                                                                                                                                                                                                                                                                                                               |   |                    |                                     |   |                    |                                       |   |                    |               |   |                    |                |   |                    |                   |   |                  |                   |   |                  |                     |   |                  |      |   |                  |          |    |                   |         |    |                   |                          |    |                   |                              |    |                   |                  |   |                  |                   |
| 5                                                                                          | return_gi_7_5      | Diarrhea                                                                                                                                           |                                                                                                                                                                                                                                                                                                                                                                                                                                                                                                                                                                                                                                                                                                                                                                                                                                                                                                                                                                                                                                               |   |                    |                                     |   |                    |                                       |   |                    |               |   |                    |                |   |                    |                   |   |                  |                   |   |                  |                     |   |                  |      |   |                  |          |    |                   |         |    |                   |                          |    |                   |                              |    |                   |                  |   |                  |                   |
| 0                                                                                          | return_gi_7_0      | None of the above                                                                                                                                  |                                                                                                                                                                                                                                                                                                                                                                                                                                                                                                                                                                                                                                                                                                                                                                                                                                                                                                                                                                                                                                               |   |                    |                                     |   |                    |                                       |   |                    |               |   |                    |                |   |                    |                   |   |                  |                   |   |                  |                     |   |                  |      |   |                  |          |    |                   |         |    |                   |                          |    |                   |                              |    |                   |                  |   |                  |                   |
| <p><b>1098 return_anxiety_7</b></p> <p>Show the field ONLY if:<br/>[return_wd_7] = '1'</p> |                    | <p><b>Section Header:</b> <i>Return Anxiety 7</i></p> <p><b>Which of the following signs or symptoms of anxiety were documented?</b></p>           | <p><b>checkbox</b></p> <table border="1"> <tr><td>1</td><td>return_anxiety_7_1</td><td>Anxiety, irritability, or agitation</td></tr> <tr><td>2</td><td>return_anxiety_7_2</td><td>Nervousness</td></tr> <tr><td>3</td><td>return_anxiety_7_3</td><td>Tremor</td></tr> <tr><td>4</td><td>return_anxiety_7_4</td><td>Restlessness</td></tr> <tr><td>0</td><td>return_anxiety_7_0</td><td>None of the above</td></tr> </table>                                                                                                                                                                                                                                                                                                                                                                                                                                                                                                                                                                                                                   | 1 | return_anxiety_7_1 | Anxiety, irritability, or agitation | 2 | return_anxiety_7_2 | Nervousness                           | 3 | return_anxiety_7_3 | Tremor        | 4 | return_anxiety_7_4 | Restlessness   | 0 | return_anxiety_7_0 | None of the above |   |                  |                   |   |                  |                     |   |                  |      |   |                  |          |    |                   |         |    |                   |                          |    |                   |                              |    |                   |                  |   |                  |                   |
| 1                                                                                          | return_anxiety_7_1 | Anxiety, irritability, or agitation                                                                                                                |                                                                                                                                                                                                                                                                                                                                                                                                                                                                                                                                                                                                                                                                                                                                                                                                                                                                                                                                                                                                                                               |   |                    |                                     |   |                    |                                       |   |                    |               |   |                    |                |   |                    |                   |   |                  |                   |   |                  |                     |   |                  |      |   |                  |          |    |                   |         |    |                   |                          |    |                   |                              |    |                   |                  |   |                  |                   |
| 2                                                                                          | return_anxiety_7_2 | Nervousness                                                                                                                                        |                                                                                                                                                                                                                                                                                                                                                                                                                                                                                                                                                                                                                                                                                                                                                                                                                                                                                                                                                                                                                                               |   |                    |                                     |   |                    |                                       |   |                    |               |   |                    |                |   |                    |                   |   |                  |                   |   |                  |                     |   |                  |      |   |                  |          |    |                   |         |    |                   |                          |    |                   |                              |    |                   |                  |   |                  |                   |
| 3                                                                                          | return_anxiety_7_3 | Tremor                                                                                                                                             |                                                                                                                                                                                                                                                                                                                                                                                                                                                                                                                                                                                                                                                                                                                                                                                                                                                                                                                                                                                                                                               |   |                    |                                     |   |                    |                                       |   |                    |               |   |                    |                |   |                    |                   |   |                  |                   |   |                  |                     |   |                  |      |   |                  |          |    |                   |         |    |                   |                          |    |                   |                              |    |                   |                  |   |                  |                   |
| 4                                                                                          | return_anxiety_7_4 | Restlessness                                                                                                                                       |                                                                                                                                                                                                                                                                                                                                                                                                                                                                                                                                                                                                                                                                                                                                                                                                                                                                                                                                                                                                                                               |   |                    |                                     |   |                    |                                       |   |                    |               |   |                    |                |   |                    |                   |   |                  |                   |   |                  |                     |   |                  |      |   |                  |          |    |                   |         |    |                   |                          |    |                   |                              |    |                   |                  |   |                  |                   |
| 0                                                                                          | return_anxiety_7_0 | None of the above                                                                                                                                  |                                                                                                                                                                                                                                                                                                                                                                                                                                                                                                                                                                                                                                                                                                                                                                                                                                                                                                                                                                                                                                               |   |                    |                                     |   |                    |                                       |   |                    |               |   |                    |                |   |                    |                   |   |                  |                   |   |                  |                     |   |                  |      |   |                  |          |    |                   |         |    |                   |                          |    |                   |                              |    |                   |                  |   |                  |                   |

|                                                                                               |                       |                                                                                                                                                             |                                                                                                                                                                                                                                                                                                                                                                                                                                                                                                                                                                                                                                                                                                                                                                                                        |   |                       |                          |            |                       |                                    |   |                       |             |   |                       |                        |   |                       |                                           |   |                       |                                             |   |                       |                                                      |   |                       |                   |
|-----------------------------------------------------------------------------------------------|-----------------------|-------------------------------------------------------------------------------------------------------------------------------------------------------------|--------------------------------------------------------------------------------------------------------------------------------------------------------------------------------------------------------------------------------------------------------------------------------------------------------------------------------------------------------------------------------------------------------------------------------------------------------------------------------------------------------------------------------------------------------------------------------------------------------------------------------------------------------------------------------------------------------------------------------------------------------------------------------------------------------|---|-----------------------|--------------------------|------------|-----------------------|------------------------------------|---|-----------------------|-------------|---|-----------------------|------------------------|---|-----------------------|-------------------------------------------|---|-----------------------|---------------------------------------------|---|-----------------------|------------------------------------------------------|---|-----------------------|-------------------|
| <p><b>1099</b> return_withdrawal_7</p> <p>Show the field ONLY if:<br/>[return_wd_7] = '1'</p> |                       | <p><b>Section Header:</b> <i>Return Withdrawal 7</i></p> <p><b>Which of the following signs or symptoms of withdrawal were documented?</b></p>              | <p><b>checkbox</b></p> <table border="1"> <tr> <td>1</td> <td>return_withdrawal_7_1</td> <td>Yawning</td> </tr> <tr> <td>2</td> <td>return_withdrawal_7_2</td> <td>Gooseflesh skin (chills/piloerecti</td> </tr> <tr> <td>3</td> <td>return_withdrawal_7_3</td> <td>Pulse &gt; 80</td> </tr> <tr> <td>4</td> <td>return_withdrawal_7_4</td> <td>Sweating (diaphoresis)</td> </tr> <tr> <td>5</td> <td>return_withdrawal_7_5</td> <td>Pupil size larger normal (dilation/mydria</td> </tr> <tr> <td>6</td> <td>return_withdrawal_7_6</td> <td>Bone, jointache body aches (arthralgias/mya</td> </tr> <tr> <td>7</td> <td>return_withdrawal_7_7</td> <td>Runny nose or tearing (rhinorr or lacrimation)</td> </tr> <tr> <td>0</td> <td>return_withdrawal_7_0</td> <td>None of theabo</td> </tr> </table> | 1 | return_withdrawal_7_1 | Yawning                  | 2          | return_withdrawal_7_2 | Gooseflesh skin (chills/piloerecti | 3 | return_withdrawal_7_3 | Pulse > 80  | 4 | return_withdrawal_7_4 | Sweating (diaphoresis) | 5 | return_withdrawal_7_5 | Pupil size larger normal (dilation/mydria | 6 | return_withdrawal_7_6 | Bone, jointache body aches (arthralgias/mya | 7 | return_withdrawal_7_7 | Runny nose or tearing (rhinorr or lacrimation)       | 0 | return_withdrawal_7_0 | None of theabo    |
| 1                                                                                             | return_withdrawal_7_1 | Yawning                                                                                                                                                     |                                                                                                                                                                                                                                                                                                                                                                                                                                                                                                                                                                                                                                                                                                                                                                                                        |   |                       |                          |            |                       |                                    |   |                       |             |   |                       |                        |   |                       |                                           |   |                       |                                             |   |                       |                                                      |   |                       |                   |
| 2                                                                                             | return_withdrawal_7_2 | Gooseflesh skin (chills/piloerecti                                                                                                                          |                                                                                                                                                                                                                                                                                                                                                                                                                                                                                                                                                                                                                                                                                                                                                                                                        |   |                       |                          |            |                       |                                    |   |                       |             |   |                       |                        |   |                       |                                           |   |                       |                                             |   |                       |                                                      |   |                       |                   |
| 3                                                                                             | return_withdrawal_7_3 | Pulse > 80                                                                                                                                                  |                                                                                                                                                                                                                                                                                                                                                                                                                                                                                                                                                                                                                                                                                                                                                                                                        |   |                       |                          |            |                       |                                    |   |                       |             |   |                       |                        |   |                       |                                           |   |                       |                                             |   |                       |                                                      |   |                       |                   |
| 4                                                                                             | return_withdrawal_7_4 | Sweating (diaphoresis)                                                                                                                                      |                                                                                                                                                                                                                                                                                                                                                                                                                                                                                                                                                                                                                                                                                                                                                                                                        |   |                       |                          |            |                       |                                    |   |                       |             |   |                       |                        |   |                       |                                           |   |                       |                                             |   |                       |                                                      |   |                       |                   |
| 5                                                                                             | return_withdrawal_7_5 | Pupil size larger normal (dilation/mydria                                                                                                                   |                                                                                                                                                                                                                                                                                                                                                                                                                                                                                                                                                                                                                                                                                                                                                                                                        |   |                       |                          |            |                       |                                    |   |                       |             |   |                       |                        |   |                       |                                           |   |                       |                                             |   |                       |                                                      |   |                       |                   |
| 6                                                                                             | return_withdrawal_7_6 | Bone, jointache body aches (arthralgias/mya                                                                                                                 |                                                                                                                                                                                                                                                                                                                                                                                                                                                                                                                                                                                                                                                                                                                                                                                                        |   |                       |                          |            |                       |                                    |   |                       |             |   |                       |                        |   |                       |                                           |   |                       |                                             |   |                       |                                                      |   |                       |                   |
| 7                                                                                             | return_withdrawal_7_7 | Runny nose or tearing (rhinorr or lacrimation)                                                                                                              |                                                                                                                                                                                                                                                                                                                                                                                                                                                                                                                                                                                                                                                                                                                                                                                                        |   |                       |                          |            |                       |                                    |   |                       |             |   |                       |                        |   |                       |                                           |   |                       |                                             |   |                       |                                                      |   |                       |                   |
| 0                                                                                             | return_withdrawal_7_0 | None of theabo                                                                                                                                              |                                                                                                                                                                                                                                                                                                                                                                                                                                                                                                                                                                                                                                                                                                                                                                                                        |   |                       |                          |            |                       |                                    |   |                       |             |   |                       |                        |   |                       |                                           |   |                       |                                             |   |                       |                                                      |   |                       |                   |
| <p><b>1100</b> return_vitals_7</p> <p>Show the field ONLY if:<br/>[return_wd_7] = '1'</p>     |                       | <p><b>Section Header:</b> <i>Return Abnormal Vitals 7</i></p> <p><b>Which of the following abnormal vital signs were documented?</b></p>                    | <p><b>checkbox</b></p> <table border="1"> <tr> <td>1</td> <td>return_vitals_7_1</td> <td>Hypoxia</td> </tr> <tr> <td>2</td> <td>return_vitals_7_2</td> <td>Hypercarbia</td> </tr> <tr> <td>3</td> <td>return_vitals_7_3</td> <td>Hypotension</td> </tr> <tr> <td>4</td> <td>return_vitals_7_4</td> <td>Bradycardia</td> </tr> <tr> <td>0</td> <td>return_vitals_7_0</td> <td>None of the above</td> </tr> </table>                                                                                                                                                                                                                                                                                                                                                                                     | 1 | return_vitals_7_1     | Hypoxia                  | 2          | return_vitals_7_2     | Hypercarbia                        | 3 | return_vitals_7_3     | Hypotension | 4 | return_vitals_7_4     | Bradycardia            | 0 | return_vitals_7_0     | None of the above                         |   |                       |                                             |   |                       |                                                      |   |                       |                   |
| 1                                                                                             | return_vitals_7_1     | Hypoxia                                                                                                                                                     |                                                                                                                                                                                                                                                                                                                                                                                                                                                                                                                                                                                                                                                                                                                                                                                                        |   |                       |                          |            |                       |                                    |   |                       |             |   |                       |                        |   |                       |                                           |   |                       |                                             |   |                       |                                                      |   |                       |                   |
| 2                                                                                             | return_vitals_7_2     | Hypercarbia                                                                                                                                                 |                                                                                                                                                                                                                                                                                                                                                                                                                                                                                                                                                                                                                                                                                                                                                                                                        |   |                       |                          |            |                       |                                    |   |                       |             |   |                       |                        |   |                       |                                           |   |                       |                                             |   |                       |                                                      |   |                       |                   |
| 3                                                                                             | return_vitals_7_3     | Hypotension                                                                                                                                                 |                                                                                                                                                                                                                                                                                                                                                                                                                                                                                                                                                                                                                                                                                                                                                                                                        |   |                       |                          |            |                       |                                    |   |                       |             |   |                       |                        |   |                       |                                           |   |                       |                                             |   |                       |                                                      |   |                       |                   |
| 4                                                                                             | return_vitals_7_4     | Bradycardia                                                                                                                                                 |                                                                                                                                                                                                                                                                                                                                                                                                                                                                                                                                                                                                                                                                                                                                                                                                        |   |                       |                          |            |                       |                                    |   |                       |             |   |                       |                        |   |                       |                                           |   |                       |                                             |   |                       |                                                      |   |                       |                   |
| 0                                                                                             | return_vitals_7_0     | None of the above                                                                                                                                           |                                                                                                                                                                                                                                                                                                                                                                                                                                                                                                                                                                                                                                                                                                                                                                                                        |   |                       |                          |            |                       |                                    |   |                       |             |   |                       |                        |   |                       |                                           |   |                       |                                             |   |                       |                                                      |   |                       |                   |
| <p><b>1101</b> return_misc_7</p> <p>Show the field ONLY if:<br/>[return_wd_7] = '1'</p>       |                       | <p><b>Section Header:</b> <i>Return Miscellaneous 7</i></p> <p><b>Which of the following miscellaneous opioid related side effects were documented?</b></p> | <p><b>checkbox</b></p> <table border="1"> <tr> <td>1</td> <td>return_misc_7_1</td> <td>Difficulty passing urine</td> </tr> <tr> <td>2</td> <td>return_misc_7_2</td> <td>Itchiness</td> </tr> <tr> <td>3</td> <td>return_misc_7_3</td> <td>Dry mouth</td> </tr> <tr> <td>4</td> <td>return_misc_7_4</td> <td>Headache</td> </tr> <tr> <td>5</td> <td>return_misc_7_5</td> <td>Unable to walk</td> </tr> <tr> <td>6</td> <td>return_misc_7_6</td> <td>Unable to discharge</td> </tr> <tr> <td>7</td> <td>return_misc_7_7</td> <td>Pupil size smaller than normal (constriction/miosis)</td> </tr> <tr> <td>0</td> <td>return_misc_7_0</td> <td>None of the above</td> </tr> </table>                                                                                                                     | 1 | return_misc_7_1       | Difficulty passing urine | 2          | return_misc_7_2       | Itchiness                          | 3 | return_misc_7_3       | Dry mouth   | 4 | return_misc_7_4       | Headache               | 5 | return_misc_7_5       | Unable to walk                            | 6 | return_misc_7_6       | Unable to discharge                         | 7 | return_misc_7_7       | Pupil size smaller than normal (constriction/miosis) | 0 | return_misc_7_0       | None of the above |
| 1                                                                                             | return_misc_7_1       | Difficulty passing urine                                                                                                                                    |                                                                                                                                                                                                                                                                                                                                                                                                                                                                                                                                                                                                                                                                                                                                                                                                        |   |                       |                          |            |                       |                                    |   |                       |             |   |                       |                        |   |                       |                                           |   |                       |                                             |   |                       |                                                      |   |                       |                   |
| 2                                                                                             | return_misc_7_2       | Itchiness                                                                                                                                                   |                                                                                                                                                                                                                                                                                                                                                                                                                                                                                                                                                                                                                                                                                                                                                                                                        |   |                       |                          |            |                       |                                    |   |                       |             |   |                       |                        |   |                       |                                           |   |                       |                                             |   |                       |                                                      |   |                       |                   |
| 3                                                                                             | return_misc_7_3       | Dry mouth                                                                                                                                                   |                                                                                                                                                                                                                                                                                                                                                                                                                                                                                                                                                                                                                                                                                                                                                                                                        |   |                       |                          |            |                       |                                    |   |                       |             |   |                       |                        |   |                       |                                           |   |                       |                                             |   |                       |                                                      |   |                       |                   |
| 4                                                                                             | return_misc_7_4       | Headache                                                                                                                                                    |                                                                                                                                                                                                                                                                                                                                                                                                                                                                                                                                                                                                                                                                                                                                                                                                        |   |                       |                          |            |                       |                                    |   |                       |             |   |                       |                        |   |                       |                                           |   |                       |                                             |   |                       |                                                      |   |                       |                   |
| 5                                                                                             | return_misc_7_5       | Unable to walk                                                                                                                                              |                                                                                                                                                                                                                                                                                                                                                                                                                                                                                                                                                                                                                                                                                                                                                                                                        |   |                       |                          |            |                       |                                    |   |                       |             |   |                       |                        |   |                       |                                           |   |                       |                                             |   |                       |                                                      |   |                       |                   |
| 6                                                                                             | return_misc_7_6       | Unable to discharge                                                                                                                                         |                                                                                                                                                                                                                                                                                                                                                                                                                                                                                                                                                                                                                                                                                                                                                                                                        |   |                       |                          |            |                       |                                    |   |                       |             |   |                       |                        |   |                       |                                           |   |                       |                                             |   |                       |                                                      |   |                       |                   |
| 7                                                                                             | return_misc_7_7       | Pupil size smaller than normal (constriction/miosis)                                                                                                        |                                                                                                                                                                                                                                                                                                                                                                                                                                                                                                                                                                                                                                                                                                                                                                                                        |   |                       |                          |            |                       |                                    |   |                       |             |   |                       |                        |   |                       |                                           |   |                       |                                             |   |                       |                                                      |   |                       |                   |
| 0                                                                                             | return_misc_7_0       | None of the above                                                                                                                                           |                                                                                                                                                                                                                                                                                                                                                                                                                                                                                                                                                                                                                                                                                                                                                                                                        |   |                       |                          |            |                       |                                    |   |                       |             |   |                       |                        |   |                       |                                           |   |                       |                                             |   |                       |                                                      |   |                       |                   |
| <p><b>1102</b> return_visits_complete</p>                                                     |                       | <p><b>Section Header:</b> <i>Form Status</i></p> <p><b>Complete?</b></p>                                                                                    | <p><b>dropdown</b></p> <table border="1"> <tr> <td>0</td> <td>Incomplete</td> </tr> <tr> <td>1</td> <td>Unverified</td> </tr> <tr> <td>2</td> <td>Complete</td> </tr> </table>                                                                                                                                                                                                                                                                                                                                                                                                                                                                                                                                                                                                                         | 0 | Incomplete            | 1                        | Unverified | 2                     | Complete                           |   |                       |             |   |                       |                        |   |                       |                                           |   |                       |                                             |   |                       |                                                      |   |                       |                   |
| 0                                                                                             | Incomplete            |                                                                                                                                                             |                                                                                                                                                                                                                                                                                                                                                                                                                                                                                                                                                                                                                                                                                                                                                                                                        |   |                       |                          |            |                       |                                    |   |                       |             |   |                       |                        |   |                       |                                           |   |                       |                                             |   |                       |                                                      |   |                       |                   |
| 1                                                                                             | Unverified            |                                                                                                                                                             |                                                                                                                                                                                                                                                                                                                                                                                                                                                                                                                                                                                                                                                                                                                                                                                                        |   |                       |                          |            |                       |                                    |   |                       |             |   |                       |                        |   |                       |                                           |   |                       |                                             |   |                       |                                                      |   |                       |                   |
| 2                                                                                             | Complete              |                                                                                                                                                             |                                                                                                                                                                                                                                                                                                                                                                                                                                                                                                                                                                                                                                                                                                                                                                                                        |   |                       |                          |            |                       |                                    |   |                       |             |   |                       |                        |   |                       |                                           |   |                       |                                             |   |                       |                                                      |   |                       |                   |
